# Supplementary material
Source: PubMed Central journal article supplement (PMC6417155)
Supplement: gaz001_schall_et_al._supplemental_table_index.pdf [file gaz001_schall_et_al._supplemental_table_index.pdf]

# Supplemental Table Index

| Table | Group | Description                                                                                     |
|-------|-------|-------------------------------------------------------------------------------------------------|
| S1    | QC    | Sample information, quality and alignment statistics                                            |
| S2    | DEGs  | Maternal DEGs                                                                                   |
| S3    | DEGs  | EGA1 DEGs                                                                                       |
| S4    | DEGs  | EGA2 DEGs                                                                                       |
| S5    | DEGs  | EGA3 DEGs                                                                                       |
| S6    | DEGs  | EGA4 DEGs                                                                                       |
| S7    | DEGs  | BL-Down DEGs                                                                                    |
| S8    | IPA   | Maternal canonical pathways                                                                     |
| S9    | IPA   | Maternal biological functions                                                                   |
| S10   | IPA   | EGA1 canonical pathways                                                                         |
| S11   | IPA   | EGA1 biological functions                                                                       |
| S12   | IPA   | EGA2 canonical pathways                                                                         |
| S13   | IPA   | EGA2 biological functions                                                                       |
| S14   | IPA   | EGA3 canonical pathways                                                                         |
| S15   | IPA   | EGA3 biological functions                                                                       |
| S16   | IPA   | EGA1 and EGA2 canonical pathways                                                                |
| S17   | IPA   | EGA1 and EGA2 biological functions                                                              |
| S18   | IPA   | EGA4 canonical pathways                                                                         |
| S19   | IPA   | EGA4 biological functions                                                                       |
| S20   | IPA   | BL-Down biological functions                                                                    |
| S21   | IPA   | MII to 8-cell mega-group biological functions                                                   |
| S22   | IPA   | MII to 8-cell mega-group canonical pathways                                                     |
| S23   | IPA   | 8-cell to morula mega-group canonical pathways                                                  |
| S24   | IPA   | Morula to Blastocyst mega-group biological functions                                            |
| S25   | IPA   | Morula to Blastocyst mega-group canonical pathways                                              |
| S26   | Sex   | Male vs. Female DEGs at Morula                                                                  |
| S27   | Sex   | Male vs. Female DEGs at Blastocyst                                                              |
| S28   | Sex   | Male vs. Female canonical pathways at Morula and Blastocyst                                     |
| S29   | URs   | Upstream regulators differentially expressed in sub-group                                       |
| S30   | URs   | IPA upstream regulators overlapping super-groups and pathway membership                         |
| S31   | URs   | Comparison of URs super-group membership across Rhesus studies                                  |
| S32   | URs   | IPA maternal upstream regulators targets in affected sub-group canonical pathways               |
| S33   | URs   | IPA EGA upstream regulators targets in affected sub-group canonical pathways                    |
| S34   | URs   | IPA maternal upstream regulators targets in affected sub-group biological functions             |
| S35   | URs   | IPA EGA1, EGA2, and EGA3 upstream regulators targets in affected sub-group biological functions |
| S36   | URs   | IPA EGA4 upstream regulators targets in affected sub-group biological functions                 |
