# Supplementary material
Source: PubMed Central journal article supplement (PMC6417155)
Supplement: gaz001_schall_et_al._table_s1.pdf [file gaz001_schall_et_al._table_s1.pdf]

Table S1 - Sample quality control and alignment statistics

| Sample Type | Sample ID | Female ID | Sex | Num. of Oocytes or Embryos | Kit        | PF Reads   | %Q>=30 | Avg Q      | Exonic Reads | Cor (SPIA vs. SOLO) | Total PF Reads | Total Aligned Reads | Total Exonic Reads |
|-------------|-----------|-----------|-----|----------------------------|------------|------------|--------|------------|--------------|---------------------|----------------|---------------------|--------------------|
| MII         | 020516_05 | 39229     | N/A | 2                          | SPIA       | 61,305,617 | 94%    | 36.19      | 22,228,611   | N/A                 | 61,305,617     | 56,625,719          | 22,228,611         |
|             | 020516_06 | 39229     | N/A | 2                          | SPIA       | 75,383,490 | 93%    | 36.06      | 28,817,021   | N/A                 | 75,383,490     | 69,847,572          | 28,817,021         |
|             | 021916_01 | 38276     | N/A | 2                          | SPIA       | 72,705,254 | 92%    | 35.93      | 26,550,477   | 0.959               | 105,318,703    | 9,891,733           | 44,064,149         |
|             |           |           |     |                            | SOLO       | 32,613,449 | 96%    | 38.97      | 17,513,672   |                     |                |                     |                    |
|             | 021916_02 | 38276     | N/A | 2                          | SPIA       | 60,974,052 | 93%    | 36.16      | 26,985,725   | N/A                 | 60,974,052     | 55,993,706          | 26,985,725         |
|             | 110515_02 | 40052     | N/A | 2                          | SPIA       | 62,750,747 | 92%    | 35.80      | 24,706,186   | N/A                 | 62,750,747     | 56,288,090          | 24,706,186         |
|             | 111815_02 | 37704     | N/A | 2                          | SPIA       | 61,480,835 | 92%    | 35.86      | 23,845,020   | 0.947               | 103,488,690    | 95,348,150          | 45,403,637         |
|             |           |           |     |                            | SOLO       | 42,007,855 | 96%    | 39.00      | 21,558,617   |                     |                |                     |                    |
| 120115_01   | 39608     | N/A       | 2   | SPIA                       | 66,242,841 | 93%        | 36.09  | 22,345,345 | 0.942        | 97,408,778          | 92,813,946     | 38,476,978          |                    |
|             |           |           |     | SOLO                       | 31,165,937 | 96%        | 39.02  | 16,131,633 |              |                     |                |                     |                    |
| 120115_02   | 39608     | N/A       | 2   | SPIA                       | 63,682,810 | 93%        | 36.13  | 26,570,592 | N/A          | 63,682,810          | 58,796,270     | 26,570,592          |                    |
| 8-cell      | 011516_02 | 37704     | F   | 1                          | SPIA       | 31,157,832 | 94%    | 36.30      | 9,438,847    | N/A                 | 31,157,832     | 28,210,213          | 9,438,847          |
|             | 011516_03 | 37704     | F   | 1                          | SPIA       | 64,799,593 | 93%    | 36.10      | 15,878,837   | N/A                 | 64,799,593     | 57,322,741          | 15,878,837         |
|             | 020816_06 | 39229     | M   | 1                          | SPIA       | 74,412,910 | 95%    | 37.98      | 11,467,364   | 0.878               | 108,399,672    | 87,342,392          | 22,778,741         |
|             |           |           |     |                            | SOLO       | 33,986,762 | 96%    | 38.98      | 11,311,377   |                     |                |                     |                    |
|             | 020816_07 | 39229     | M   | 1                          | SPIA       | 93,021,283 | 93%    | 36.05      | 18,380,197   | 0.877               | 129,334,455    | 114,490,675         | 30,598,252         |
|             |           |           |     |                            | SOLO       | 36,313,172 | 96%    | 38.97      | 12,218,055   |                     |                |                     |                    |
|             | 020816_08 | 39229     | M   | 1                          | SPIA       | 25,134,429 | 94%    | 36.20      | 2,980,569    | 0.824               | 60,225,777     | 54,367,421          | 14,009,165         |
|             |           |           |     |                            | SOLO       | 35,091,348 | 96%    | 39.05      | 11,028,596   |                     |                |                     |                    |
|             | 020816_09 | 39229     | F   | 1                          | SPIA       | 57,839,729 | 94%    | 36.18      | 16,468,320   | N/A                 | 57,839,729     | 52,047,615          | 16,468,320         |
|             | 020816_10 | 39229     | F   | 1                          | SPIA       | 79,688,554 | 96%    | 37.97      | 17,444,011   | N/A                 | 79,688,554     | 61,407,856          | 17,444,011         |
|             | 112015_01 | 37704     | ?   | 1                          | SPIA       | 66,105,810 | 93%    | 36.01      | 17,340,681   | N/A                 | 66,105,810     | 59,124,698          | 17,340,681         |
|             | 112015_02 | 37704     | ?   | 1                          | SPIA       | 67,148,890 | 93%    | 36.08      | 18,373,308   | N/A                 | 67,148,890     | 58,654,154          | 18,373,308         |
| 112815_01   | 38783     | F         | 1   | SPIA                       | 34,102,110 | 94%        | 36.32  | 8,760,108  | N/A          | 34,102,110          | 31,018,103     | 8,760,108           |                    |
| 112815_02   | 38783     | M         | 1   | SPIA                       | 29,061,974 | 95%        | 36.44  | 5,952,428  | 0.889        | 67,964,021          | 52,425,934     | 16,319,584          |                    |
|             |           |           |     | SOLO                       | 38,902,047 | 96%        | 38.95  | 10,367,156 |              |                     |                |                     |                    |
| Morula      | 020816_02 | 40232     | M   | 1                          | SPIA       | 26,924,277 | 94%    | 36.19      | 5,849,864    | N/A                 | 26,924,277     | 24,447,847          | 5,849,864          |
|             | 020816_03 | 40232     | M   | 1                          | SPIA       | 30,703,326 | 94%    | 36.29      | 5,068,330    | N/A                 | 30,703,326     | 21,964,495          | 5,068,330          |
|             | 020816_04 | 40232     | M   | 1                          | SPIA       | 83,843,998 | 95%    | 36.36      | 16,830,364   | N/A                 | 83,843,998     | 53,775,155          | 16,830,364         |
|             | 021016_02 | 39229     | M   | 1                          | SPIA       | 31,342,937 | 94%    | 36.23      | 3,728,520    | 0.934               | 73,678,995     | 67,676,888          | 19,089,358         |
|             |           |           |     |                            | SOLO       | 42,336,058 | 96%    | 38.99      | 15,360,838   |                     |                |                     |                    |
|             | 021016_03 | 39229     | F   | 1                          | SPIA       | 30,193,265 | 95%    | 36.41      | 4,326,530    | 0.923               | 54,055,290     | 48,368,508          | 14,136,191         |
|             |           |           |     |                            | SOLO       | 23,862,025 | 96%    | 38.94      | 9,809,661    |                     |                |                     |                    |
|             | 021016_04 | 39229     | F   | 1                          | SPIA       | 32,190,001 | 95%    | 36.39      | 8,969,317    | N/A                 | 32,190,001     | 28,910,155          | 8,969,317          |
|             | 022416_02 | 38276     | F   | 1                          | SPIA       | 33,095,670 | 95%    | 36.45      | 4,935,720    | 0.897               | 65,699,469     | 60,355,875          | 18,289,885         |
|             |           |           |     |                            | SOLO       | 32,603,799 | 96%    | 38.96      | 13,354,165   |                     |                |                     |                    |
|             | 022416_03 | 38276     | F   | 1                          | SPIA       | 31,753,884 | 95%    | 36.39      | 10,513,922   | N/A                 | 31,753,884     | 29,471,733          | 10,513,922         |
|             | 022916_01 | 39026     | ?   | 1                          | SPIA       | 26,935,119 | 94%    | 36.24      | 1,773,735    | 0.924               | 71,694,811     | 62,222,364          | 15,066,742         |
|             |           |           |     | SOLO                       | 44,759,692 | 96%        | 38.99  | 13,293,007 |              |                     |                |                     |                    |
| 022916_02   | 39026     | ?         | 1   | SPIA                       | 93,407,780 | 94%        | 36.26  | 21,044,692 | N/A          | 93,407,780          | 80,124,910     | 21,044,692          |                    |
| 022916_03   | 39026     | F         | 1   | SPIA                       | 63,922,965 | 93%        | 36.11  | 20,117,989 | N/A          | 63,922,965          | 56,850,354     | 20,117,989          |                    |
| Exp. Blast  | 111215_01 | 40052     | M   | 1                          | SPIA       | 30,800,931 | 94%    | 36.27      | 3,155,120    | 0.946               | 56,474,447     | 53,661,307          | 12,324,165         |
|             |           |           |     |                            | SOLO       | 25,673,516 | 96%    | 39.03      | 9,169,045    |                     |                |                     |                    |
|             | 111215_02 | 40052     | M   | 1                          | SPIA       | 69,830,253 | 96%    | 38.02      | 11,676,340   | N/A                 | 69,830,253     | 52,884,834          | 11,676,340         |
|             | 111215_03 | 40052     | F   | 1                          | SPIA       | 29,224,153 | 95%    | 36.44      | 2,978,080    | 0.9                 | 60,245,599     | 58,111,350          | 17,401,788         |
|             |           |           |     |                            | SOLO       | 31,021,446 | 96%    | 39.01      | 14,423,708   |                     |                |                     |                    |
|             | 111715_01 | 39670     | F   | 1                          | SPIA       | 32,824,118 | 95%    | 36.51      | 3,399,895    | 0.966               | 74,486,294     | 59,856,211          | 13,746,677         |
|             |           |           |     |                            | SOLO       | 41,662,176 | 96%    | 39.03      | 10,346,782   |                     |                |                     |                    |
|             | 111715_02 | 39670     | M   | 1                          | SPIA       | 29,097,108 | 95%    | 36.45      | 3,637,744    | 0.909               | 68,054,186     | 64,097,230          | 16,740,432         |
|             |           |           |     |                            | SOLO       | 38,957,078 | 96%    | 38.96      | 13,102,688   |                     |                |                     |                    |
|             | 111715_03 | 40232     | ?   | 1                          | SPIA       | 26,704,365 | 94%    | 36.26      | 4,846,910    | N/A                 | 26,704,365     | 24,475,787          | 4,846,910          |
|             | 111715_04 | 40232     | F   | 1                          | SPIA       | 32,321,009 | 96%    | 36.57      | 3,367,982    | 0.959               | 74,515,347     | 68,214,105          | 17,064,067         |
|             |           |           |     |                            | SOLO       | 42,194,338 | 96%    | 39.00      | 13,696,085   |                     |                |                     |                    |
|             | 112415_01 | 37704     | M   | 1                          | SPIA       | 28,121,370 | 94%    | 36.29      | 5,408,647    | N/A                 | 28,121,370     | 26,129,354          | 5,408,647          |
|             | 112415_02 | 37704     | F   | 1                          | SPIA       | 30,137,449 | 94%    | 36.25      | 5,938,871    | N/A                 | 30,137,449     | 27,861,313          | 5,938,871          |
|             | 112415_03 | 37704     | M   | 1                          | SPIA       | 34,335,536 | 96%    | 36.58      | 4,298,681    | 0.914               | 66,418,326     | 63,614,550          | 16,513,169         |
|             |           |           |     |                            | SOLO       | 32,082,790 | 96%    | 38.96      | 12,214,488   |                     |                |                     |                    |
| 112415_04   | 37704     | ?         | 1   | SPIA                       | 33,863,220 | 95%        | 36.47  | 7,843,349  | N/A          | 33,863,220          | 31,805,983     | 7,843,349           |                    |
| 112515_03   | 40422     | M         | 1   | SPIA                       | 30,553,407 | 95%        | 36.46  | 9,455,230  | N/A          | 30,553,407          | 28,203,224     | 9,455,230           |                    |
| 112515_04   | 40422     | F         | 1   | SPIA                       | 33,776,668 | 95%        | 36.46  | 9,278,516  | N/A          | 33,776,668          | 31,674,286     | 9,278,516           |                    |
