# Supplementary material
Source: PubMed Central journal article supplement (PMC6417155)
Supplement: gaz001_schall_et_al._table_s2.pdf [file gaz001_schall_et_al._table_s2.pdf]

Table S2 - Maternal super-group DEGs

| Ensembl ID         | Symbol    | GeneName                                                           | FPKM <sup>a</sup> |        |        |            | MII:8-Cell        |                  | 8-Cell:Morula |          | Morula:Blast |          | Sub-Group |
|--------------------|-----------|--------------------------------------------------------------------|-------------------|--------|--------|------------|-------------------|------------------|---------------|----------|--------------|----------|-----------|
|                    |           |                                                                    | MI                | 8Cell  | Morula | Exp. Blast | L2FC <sup>b</sup> | FDR <sup>c</sup> | L2FC          | FDR      | L2FC         | FDR      |           |
| ENSMMUG00000014682 | PLCH2     | Phospholipase C Eta 2                                              | 3.85              | 14.84  | 0.15   | 0.07       | 1.89              | 2.15E-01         | -7.26         | 2.88E-08 | 0.62         | 8.79E-01 | M-1       |
| ENSMMUG00000023678 | PLEKHG5   | Pleckstrin Homology And RhoGEF Domain Containing G5                | 13.64             | 3.56   | 0.36   | 0.44       | -1.43             | 1.60E-01         | -4.49         | 3.98E-07 | 0.31         | 9.10E-01 | M-1       |
| ENSMMUG00000047133 |           |                                                                    | 12.18             | 4.95   | 1.16   | 0.91       | -1.37             | 2.76E-01         | -3.73         | 8.78E-04 | -0.15        | 9.72E-01 | M-1       |
| ENSMMUG00000038004 |           |                                                                    | 26.90             | 30.80  | 16.44  | 16.50      | 0.32              | 6.47E-01         | -1.11         | 4.20E-02 | 0.52         | 6.25E-01 | M-1       |
| ENSMMUG00000042176 | ERRF1     | ERBB Receptor Feedback Inhibitor 1                                 | 39.81             | 49.83  | 17.36  | 9.15       | 0.04              | 9.72E-01         | -1.90         | 7.34E-03 | 0.10         | 9.69E-01 | M-1       |
| ENSMMUG00000021399 | RERE      | Arginine-glutamic Acid Dipeptide Repeats                           | 77.77             | 96.68  | 16.41  | 10.62      | 0.41              | 6.00E-01         | -2.60         | 8.36E-06 | -0.47        | 7.32E-01 | M-1       |
| ENSMMUG00000006225 | CTNNBIP1  | Catenin Beta Interacting Protein 1                                 | 17.89             | 17.62  | 5.29   | 9.04       | -0.01             | 9.95E-01         | -1.58         | 2.08E-02 | 0.34         | 8.41E-01 | M-1       |
| ENSMMUG00000006164 | TMEM51    | Transmembrane Protein 51                                           | 3.78              | 1.77   | 0.16   | 0.62       | -0.85             | 6.57E-01         | -3.48         | 2.18E-02 | 2.07         | 4.26E-01 | M-1       |
| ENSMMUG00000016281 | PLEKHM2   | Pleckstrin Homology And RUN Domain Containing M2                   | 9.22              | 19.15  | 0.60   | 1.02       | 1.19              | 3.68E-01         | -5.41         | 2.99E-07 | 1.51         | 4.38E-01 | M-1       |
| ENSMMUG00000019940 | NECAP2    | NECAP Endocytosis Associated 2                                     | 28.92             | 12.94  | 6.14   | 8.59       | -1.11             | 1.87E-01         | -1.56         | 4.70E-02 | 0.38         | 8.46E-01 | M-1       |
| ENSMMUG00000001420 | MFAP2     | Microfibril Associated Protein 2                                   | 13.07             | 4.02   | 0.30   | 0.12       | -2.70             | 6.49E-02         | -5.73         | 6.06E-05 | -0.69        | 8.58E-01 | M-1       |
| ENSMMUG00000022437 | PADI6     | Peptidyl Arginine Deiminase 6                                      | 84.58             | 20.81  | 1.65   | 0.37       | -1.74             | 8.07E-02         | -5.09         | 1.07E-08 | -1.94        | 1.67E-01 | M-1       |
| ENSMMUG00000032222 | HTR1D     | 5-hydroxytryptamine Receptor 1D                                    | 11.95             | 2.93   | 4.89   | 0.21       | -2.00             | 1.92E-01         | -4.59         | 1.39E-03 | 0.30         | 9.53E-01 | M-1       |
| ENSMMUG00000010977 | LOC718864 | Transcription Elongation Factor A Protein 3                        | 9.91              | 6.92   | 0.21   | 0.10       | -0.26             | 8.74E-01         | -4.77         | 1.84E-05 | 0.01         | 9.99E-01 | M-1       |
| ENSMMUG00000042021 | ASAP3     | ArfGAP With SH3 Domain, Ankyrin Repeat And PH Domain 3             | 1.65              | 0.34   | 0.09   | 0.03       | -2.71             | 9.71E-02         | -3.68         | 2.58E-02 | -0.12        | 9.85E-01 | M-1       |
| ENSMMUG00000004463 | GRHL3     | Grainyhead Like Transcription Factor 3                             | 57.44             | 33.38  | 2.09   | 4.26       | -1.22             | 2.54E-01         | -4.88         | 3.45E-08 | 1.33         | 4.05E-01 | M-1       |
| ENSMMUG00000018014 | MACO1     | Macoilin 1                                                         | 50.15             | 46.40  | 7.12   | 4.49       | -0.32             | 7.95E-01         | -2.76         | 1.06E-03 | -0.53        | 8.03E-01 | M-1       |
| ENSMMUG00000007851 | SELENON   | Selenoprotein N                                                    | 7.46              | 5.07   | 1.08   | 1.54       | 0.10              | 9.61E-01         | -3.42         | 6.41E-03 | 1.39         | 5.62E-01 | M-1       |
| ENSMMUG00000007857 | PAQR7     | Progesterone And AdipoQ Receptor Family Member 7                   | 17.49             | 10.34  | 1.48   | 0.91       | -1.07             | 3.32E-01         | -2.31         | 1.54E-02 | -1.24        | 4.58E-01 | M-1       |
| ENSMMUG00000041653 |           |                                                                    | 11.75             | 21.13  | 10.73  | 23.93      | 2.68              | 9.53E-02         | -3.20         | 4.33E-02 | 2.88         | 2.29E-01 | M-1       |
| ENSMMUG00000000644 | CEP85     | Centrosomal Protein 85                                             | 30.25             | 14.62  | 4.83   | 4.45       | -0.66             | 3.43E-01         | -2.34         | 3.89E-05 | 0.44         | 7.47E-01 | M-1       |
| ENSMMUG00000000649 | UBXN11    | UBX Domain Protein 11                                              | 4.55              | 4.94   | 2.16   | 0.18       | 0.31              | 8.93E-01         | -3.36         | 3.06E-02 | -3.05        | 1.84E-01 | M-1       |
| ENSMMUG00000012697 | ARID1A    | AT-rich Interaction Domain 1A                                      | 34.59             | 41.26  | 18.11  | 25.09      | 0.42              | 4.62E-01         | -1.09         | 2.34E-02 | 0.02         | 9.93E-01 | M-1       |
| ENSMMUG00000010290 |           |                                                                    | 128.52            | 167.29 | 83.14  | 66.20      | 0.61              | 3.50E-01         | -1.28         | 2.43E-02 | 0.09         | 9.67E-01 | M-1       |
| ENSMMUG00000016893 | LOC720079 | Sodium/hydrogen Exchanger 1                                        | 15.39             | 37.13  | 12.82  | 12.36      | 1.24              | 8.84E-02         | -1.80         | 7.74E-03 | 0.48         | 7.55E-01 | M-1       |
| ENSMMUG00000018325 | GPR3      | G Protein-coupled Receptor 3                                       | 2.35              | 3.92   | 0.36   | 0.22       | -1.52             | 4.35E-01         | -5.06         | 3.25E-03 | -0.05        | 9.95E-01 | M-1       |
| ENSMMUG00000012252 | STX12     | Syntaxin 12                                                        | 30.55             | 46.28  | 8.15   | 8.86       | 0.85              | 2.97E-01         | -3.02         | 6.55E-06 | 0.60         | 6.92E-01 | M-1       |
| ENSMMUG00000018172 | RPA2      | Replication Protein A2                                             | 17.49             | 36.50  | 7.42   | 10.64      | 1.31              | 2.35E-01         | -2.60         | 7.34E-03 | 0.13         | 9.72E-01 | M-1       |
| ENSMMUG00000017080 | DNAJC8    | DnaJ Heat Shock Protein Family (Hsp40) Member C8                   | 19.87             | 38.78  | 15.46  | 13.18      | 0.97              | 1.46E-01         | -1.30         | 3.70E-02 | -0.33        | 8.27E-01 | M-1       |
| ENSMMUG00000042992 | TAF12     | TATA-box Binding Protein Associated Factor 12                      | 3.19              | 8.66   | 2.00   | 2.02       | 1.52              | 1.20E-01         | -2.37         | 8.02E-03 | 0.37         | 8.80E-01 | M-1       |
| ENSMMUG00000011390 | LOC720327 | Glucocorticoid Modulatory Element-binding Protein 1                | 32.01             | 48.52  | 17.02  | 14.93      | 0.35              | 7.22E-01         | -2.07         | 3.26E-03 | 0.07         | 9.80E-01 | M-1       |
| ENSMMUG00000011377 | EPB41     | Erythrocyte Membrane Protein Band 4.1                              | 25.53             | 24.81  | 8.29   | 6.03       | -0.07             | 9.36E-01         | -1.89         | 2.47E-04 | -0.59        | 5.63E-01 | M-1       |
| ENSMMUG00000023438 | KHDRBS1   | KH RNA Binding Domain Containing, Signal Transduction Associated 1 | 58.25             | 53.22  | 26.19  | 28.52      | -0.26             | 6.99E-01         | -1.11         | 3.09E-02 | 0.47         | 6.47E-01 | M-1       |
| ENSMMUG00000015650 | TMEM39B   | Transmembrane Protein 39B                                          | 3.10              | 1.89   | 0.66   | 0.44       | -0.07             | 9.58E-01         | -2.11         | 2.16E-02 | -0.61        | 7.78E-01 | M-1       |

|                    |            |                                                          |        |        |       |       |       |          |       |          |       |          |     |
|--------------------|------------|----------------------------------------------------------|--------|--------|-------|-------|-------|----------|-------|----------|-------|----------|-----|
| ENSMMUG0000001264  | BSDC1      | BSD Domain Containing 1                                  | 12.54  | 41.12  | 14.93 | 4.76  | 1.56  | 8.60E-02 | -1.94 | 2.46E-02 | -0.74 | 6.79E-01 | M-1 |
| ENSMMUG00000009940 | LOC67938   | Histone-binding Protein RBBP4                            | 183.54 | 167.20 | 80.94 | 59.16 | 0.11  | 9.01E-01 | -1.72 | 1.80E-03 | -0.10 | 9.64E-01 | M-1 |
| ENSMMUG00000019743 | KIAA1522   | KIAA1522 Ortholog                                        | 10.26  | 19.78  | 0.83  | 1.45  | -0.08 | 9.64E-01 | -3.63 | 1.93E-03 | -0.14 | 9.74E-01 | M-1 |
| ENSMMUG00000003267 | ZNF362     | Zinc Finger Protein 362                                  | 5.51   | 1.84   | 0.52  | 1.47  | -1.68 | 2.77E-01 | -4.71 | 7.21E-04 | 2.99  | 1.27E-01 | M-1 |
| ENSMMUG00000003269 | PHC2       | Polyhomeotic Homolog 2                                   | 5.17   | 1.59   | 0.38  | 0.74  | -1.01 | 4.15E-01 | -3.13 | 2.38E-03 | 1.20  | 5.43E-01 | M-1 |
| ENSMMUG00000010961 | CLSPN      | Claspin                                                  | 55.51  | 90.04  | 20.34 | 11.04 | 0.59  | 2.10E-01 | -2.02 | 3.17E-07 | -0.77 | 2.23E-01 | M-1 |
| ENSMMUG00000014340 | CDC48      | Cell Division Cycle Associated 8                         | 55.08  | 41.05  | 16.57 | 13.72 | -0.05 | 9.72E-01 | -2.00 | 1.12E-02 | 0.44  | 8.21E-01 | M-1 |
| ENSMMUG00000023275 | MTF1       | Metal Regulatory Transcription Factor 1                  | 67.17  | 51.53  | 18.06 | 7.85  | -0.57 | 4.85E-01 | -1.67 | 1.21E-02 | -1.06 | 3.19E-01 | M-1 |
| ENSMMUG00000023199 | SF3A3      | Splicing Factor 3a Subunit 3                             | 85.95  | 58.73  | 27.51 | 23.02 | -0.36 | 4.89E-01 | -1.45 | 4.48E-04 | -0.03 | 9.87E-01 | M-1 |
| ENSMMUG00000005836 | ZFP69B     | ZFP69 Zinc Finger Protein B                              | 5.71   | 7.88   | 0.77  | 0.43  | 0.30  | 8.60E-01 | -2.63 | 2.38E-02 | -0.51 | 8.72E-01 | M-1 |
| ENSMMUG00000016199 | ZFP69      | ZFP69 Zinc Finger Protein                                | 8.97   | 4.33   | 0.66  | 1.49  | -1.82 | 9.17E-02 | -2.55 | 1.16E-02 | 2.45  | 6.97E-02 | M-1 |
| ENSMMUG00000013125 | RIMKLA     | Ribosomal Modification Protein RimK Like Family Member A | 35.27  | 21.64  | 0.44  | 0.28  | -1.55 | 3.27E-01 | -6.94 | 1.82E-07 | 1.96  | 4.15E-01 | M-1 |
| ENSMMUG00000043761 | C1H1orf210 | Chromosome 1 Open Reading Frame, Human C1orf210          | 11.49  | 3.78   | 0.36  | 1.85  | -2.31 | 5.73E-02 | -3.39 | 3.16E-03 | 2.07  | 2.41E-01 | M-1 |
| ENSMMUG00000023671 | MED8       | Mediator Complex Subunit 8                               | 6.75   | 18.62  | 3.95  | 2.35  | 0.84  | 4.88E-01 | -2.30 | 2.21E-02 | 1.37  | 4.23E-01 | M-1 |
| ENSMMUG00000021929 | KIF2C      | Kinesin Family Member 2C                                 | 10.99  | 16.43  | 4.59  | 5.12  | 0.75  | 2.92E-01 | -2.01 | 9.00E-04 | 0.20  | 9.11E-01 | M-1 |
| ENSMMUG00000006582 | PLK3       | Polo Like Kinase 3                                       | 5.99   | 9.61   | 2.88  | 0.38  | 0.30  | 8.62E-01 | -3.00 | 7.98E-03 | -2.32 | 1.66E-01 | M-1 |
| ENSMMUG00000040001 | BTBD19     | BTB Domain Containing 19                                 | 4.01   | 3.10   | 0.23  | 0.26  | 0.21  | 9.38E-01 | -5.08 | 4.00E-03 | -1.01 | 8.27E-01 | M-1 |
| ENSMMUG00000037829 |            |                                                          | 1.78   | 5.01   | 0.14  | 0.70  | 0.98  | 7.27E-01 | -5.85 | 6.58E-03 | 3.54  | 3.07E-01 | M-1 |
| ENSMMUG00000023431 | AKR1A1     | Aldo-keto Reductase Family 1 Member A1                   | 275.79 | 180.79 | 73.66 | 93.37 | -0.89 | 5.52E-02 | -1.04 | 2.06E-02 | 0.08  | 9.64E-01 | M-1 |
| ENSMMUG00000001960 | GPBP1L1    | GC-rich Promoter Binding Protein 1 Like 1                | 71.71  | 75.01  | 29.00 | 25.34 | 0.09  | 9.17E-01 | -1.45 | 5.67E-03 | 0.13  | 9.40E-01 | M-1 |
| ENSMMUG00000015371 | MAST2      | Microtubule Associated Serine/threonine Kinase 2         | 5.48   | 11.60  | 2.10  | 1.95  | 1.06  | 2.92E-01 | -2.65 | 1.96E-03 | -0.32 | 8.98E-01 | M-1 |
| ENSMMUG00000020162 | MKNK1      | MAP Kinase Interacting Serine/threonine Kinase 1         | 10.64  | 5.60   | 3.61  | 0.82  | -0.78 | 5.89E-01 | -2.96 | 9.46E-03 | 0.58  | 8.43E-01 | M-1 |
| ENSMMUG00000018867 | LOC709535  | Cytochrome P450 4X1                                      | 1.16   | 3.98   | 0.17  | 0.33  | 2.00  | 3.34E-01 | -4.73 | 8.91E-03 | 1.56  | 6.93E-01 | M-1 |
| ENSMMUG00000009282 | SPATA6     | Spermatogenesis Associated 6                             | 15.57  | 12.51  | 3.42  | 0.48  | -0.16 | 9.28E-01 | -4.24 | 5.10E-05 | -0.75 | 7.71E-01 | M-1 |
| ENSMMUG00000007611 | MAGOH      | Mago Homolog, Exon Junction Complex Core Component       | 88.60  | 166.88 | 89.19 | 53.57 | 0.67  | 2.26E-01 | -1.20 | 1.43E-02 | 0.08  | 9.64E-01 | M-1 |
| ENSMMUG00000010406 | PRKAA2     | Protein Kinase AMP-activated Catalytic Subunit Alpha 2   | 11.22  | 6.91   | 1.15  | 6.45  | -1.51 | 1.59E-01 | -2.14 | 3.31E-02 | 2.11  | 1.27E-01 | M-1 |
| ENSMMUG00000002387 | FGGY       | FGGY Carbohydrate Kinase Domain Containing               | 0.71   | 4.21   | 0.47  | 0.27  | 0.32  | 8.49E-01 | -2.60 | 2.80E-02 | -2.30 | 1.90E-01 | M-1 |
| ENSMMUG00000012850 | HOOK1      | Hook Microtubule Tethering Protein 1                     | 22.26  | 16.52  | 3.83  | 1.80  | -0.79 | 4.31E-01 | -3.80 | 2.19E-06 | 0.70  | 7.03E-01 | M-1 |
| ENSMMUG00000020048 | EFCAB7     | EF-hand Calcium Binding Domain 7                         | 12.79  | 4.75   | 0.90  | 2.67  | -1.22 | 1.71E-01 | -2.23 | 6.08E-03 | 0.40  | 8.53E-01 | M-1 |
| ENSMMUG00000014807 | GNG12      | G Protein Subunit Gamma 12                               | 27.78  | 16.80  | 2.90  | 1.14  | -0.83 | 4.25E-01 | -3.57 | 1.42E-05 | 0.08  | 9.80E-01 | M-1 |
| ENSMMUG00000047939 |            |                                                          | 19.83  | 5.66   | 0.59  | 0.53  | -1.87 | 1.64E-01 | -3.60 | 3.71E-03 | -0.75 | 8.12E-01 | M-1 |
| ENSMMUG00000020218 | AK5        | Adenylate Kinase 5                                       | 15.42  | 13.46  | 1.65  | 0.46  | -0.18 | 9.21E-01 | -3.98 | 3.57E-04 | 0.13  | 9.75E-01 | M-1 |
| ENSMMUG00000011987 | MIGA1      | Mitoguardin 1                                            | 4.55   | 12.04  | 3.55  | 5.41  | 1.38  | 1.48E-01 | -1.82 | 4.24E-02 | 1.13  | 4.63E-01 | M-1 |
| ENSMMUG00000038395 | DNAJB4     | DnaJ Heat Shock Protein Family (Hsp40) Member B4         | 3.84   | 3.22   | 0.51  | 0.71  | 0.30  | 8.17E-01 | -2.57 | 4.37E-03 | 0.70  | 7.30E-01 | M-1 |
| ENSMMUG00000005720 | BCL10      | B-cell CLL/lymphoma 10                                   | 27.44  | 75.06  | 8.16  | 8.33  | 0.75  | 5.52E-01 | -2.95 | 3.01E-03 | 1.11  | 5.59E-01 | M-1 |
| ENSMMUG00000014573 | DDAH1      | Dimethylarginine Dimethylaminohydrolase 1                | 2.62   | 7.17   | 0.18  | 0.62  | 1.76  | 1.78E-01 | -4.81 | 2.54E-05 | 0.68  | 8.16E-01 | M-1 |
| ENSMMUG00000031997 |            |                                                          | 11.07  | 5.82   | 1.69  | 2.30  | -0.75 | 6.01E-01 | -2.33 | 4.58E-02 | -0.70 | 8.02E-01 | M-1 |
| ENSMMUG00000017707 | LRRC8B     | Leucine Rich Repeat Containing 8 VRAC Subunit B          | 11.85  | 4.01   | 2.77  | 0.51  | -1.22 | 2.69E-01 | -2.32 | 1.71E-02 | -1.96 | 1.65E-01 | M-1 |

|                     |         |                                                                                    |        |        |        |       |       |          |        |          |       |          |     |
|---------------------|---------|------------------------------------------------------------------------------------|--------|--------|--------|-------|-------|----------|--------|----------|-------|----------|-----|
| ENSMMUG00000012828  | LRRC8D  | Leucine Rich Repeat<br>Containing 8 VRAC Subunit<br>D                              | 10.25  | 4.79   | 1.73   | 4.03  | -1.20 | 2.25E-01 | -1.92  | 3.28E-02 | 1.00  | 5.42E-01 | M-1 |
| ENSMMUG00000013939  |         |                                                                                    | 0.68   | 1.37   | 0.11   | 0.00  | 1.94  | 4.92E-01 | -6.43  | 6.68E-03 | 2.03  | 7.01E-01 | M-1 |
| ENSMMUG00000010095  | GLMN    | Glomulin, FKBP Associated<br>Protein                                               | 46.21  | 35.91  | 18.25  | 4.55  | -0.71 | 2.90E-01 | -1.62  | 4.88E-03 | -1.06 | 2.28E-01 | M-1 |
| ENSMMUG00000015924  | BCAR3   | BCAR3, NSP Family Adaptor<br>Protein                                               | 9.79   | 2.26   | 0.22   | 0.79  | -2.43 | 7.44E-02 | -3.22  | 1.39E-02 | 1.13  | 6.80E-01 | M-1 |
| ENSMMUG00000013858  | ABCA4   | ATP Binding Cassette<br>Subfamily A Member 4                                       | 1.56   | 0.88   | 0.05   | 0.18  | -1.50 | 3.07E-01 | -3.86  | 3.62E-03 | -1.84 | 4.42E-01 | M-1 |
| ENSMMUG00000004240  | SASS6   | SAS-6 Centriolar Assembly<br>Protein                                               | 59.00  | 84.75  | 20.70  | 18.16 | 0.83  | 4.26E-01 | -2.34  | 6.69E-03 | -0.11 | 9.72E-01 | M-1 |
| ENSMMUG000000040885 |         |                                                                                    | 2.75   | 2.56   | 0.04   | 0.00  | -0.26 | 9.33E-01 | -5.23  | 1.52E-02 | -0.98 | 8.66E-01 | M-1 |
| ENSMMUG000000037989 |         |                                                                                    | 10.30  | 12.11  | 1.61   | 0.14  | -0.55 | 6.65E-01 | -4.06  | 1.60E-05 | -1.72 | 2.92E-01 | M-1 |
| ENSMMUG000000019714 | VAV3    | Vav Guanine Nucleotide<br>Exchange Factor 3                                        | 8.67   | 6.17   | 2.06   | 0.93  | -0.61 | 6.29E-01 | -2.49  | 1.14E-02 | -0.12 | 9.74E-01 | M-1 |
| ENSMMUG000000009265 | WDR47   | WD Repeat Domain 47                                                                | 32.54  | 31.76  | 8.93   | 2.94  | -0.19 | 8.35E-01 | -2.46  | 2.13E-05 | -0.77 | 4.74E-01 | M-1 |
| ENSMMUG000000021544 | SLC6A17 | Solute Carrier Family 6<br>Member 17                                               | 6.74   | 3.04   | 0.17   | 0.15  | -1.84 | 1.02E-01 | -4.39  | 1.54E-05 | 0.05  | 9.90E-01 | M-1 |
| ENSMMUG000000015020 | RBM15   | RNA Binding Motif Protein<br>15                                                    | 4.56   | 8.23   | 4.60   | 5.07  | 0.98  | 1.88E-01 | -1.44  | 3.51E-02 | 0.65  | 6.26E-01 | M-1 |
| ENSMMUG000000018684 | KCNA3   | Potassium Voltage-gated<br>Channel Subfamily A<br>Member 3                         | 1.37   | 3.45   | 0.01   | 0.05  | 1.23  | 6.15E-01 | -10.97 | 1.43E-08 | 4.69  | 8.93E-02 | M-1 |
| ENSMMUG000000017819 | PHTF1   | Putative Homeodomain<br>Transcription Factor 1                                     | 19.06  | 22.93  | 5.64   | 5.02  | 0.02  | 9.85E-01 | -2.87  | 4.99E-05 | 0.82  | 5.59E-01 | M-1 |
| ENSMMUG000000019528 | AP4B1   | Adaptor Related Protein<br>Complex 4 Beta 1 Subunit                                | 11.43  | 7.25   | 3.19   | 2.60  | -0.26 | 8.56E-01 | -2.24  | 2.31E-02 | 0.78  | 7.13E-01 | M-1 |
| ENSMMUG000000001974 | CSDE1   | Cold Shock Domain<br>Containing E1                                                 | 373.34 | 287.24 | 116.61 | 72.80 | -0.33 | 6.63E-01 | -1.61  | 4.59E-03 | -0.21 | 8.96E-01 | M-1 |
| ENSMMUG000000016905 | TTF2    | Transcription Termination<br>Factor 2                                              | 6.14   | 11.55  | 4.64   | 6.81  | 0.81  | 2.46E-01 | -1.33  | 3.47E-02 | 0.29  | 8.54E-01 | M-1 |
| ENSMMUG000000015976 | TRIM45  | Tripartite Motif Containing<br>45                                                  | 8.33   | 3.80   | 0.73   | 0.78  | -0.90 | 4.29E-01 | -2.39  | 1.30E-02 | 0.06  | 9.86E-01 | M-1 |
| ENSMMUG000000016964 | VTCN1   | V-set Domain Containing T-<br>cell Activation Inhibitor 1                          | 27.48  | 10.97  | 1.28   | 0.36  | 0.22  | 8.96E-01 | -6.34  | 4.62E-10 | 0.96  | 6.79E-01 | M-1 |
| ENSMMUG000000016568 | HSD3B2  | Hydroxy-delta-5-steroid<br>Dehydrogenase, 3 Beta- And<br>Steroid Delta-isomerase 2 | 0.47   | 4.26   | 0.04   | 0.10  | 3.53  | 1.15E-01 | -6.41  | 2.40E-03 | 4.35  | 1.69E-01 | M-1 |
| ENSMMUG000000018375 | NOTCH2  | Notch 2                                                                            | 3.62   | 4.85   | 0.48   | 0.44  | 0.25  | 8.58E-01 | -3.42  | 1.90E-04 | -0.68 | 7.58E-01 | M-1 |
| ENSMMUG000000016738 | POLR3GL | RNA Polymerase III Subunit<br>G Like                                               | 14.01  | 9.24   | 2.05   | 7.09  | -0.54 | 7.09E-01 | -2.24  | 4.34E-02 | 2.37  | 1.14E-01 | M-1 |
| ENSMMUG000000007244 | OTUD7B  | OTU Deubiquitinase 7B                                                              | 33.66  | 21.30  | 3.95   | 3.14  | -0.49 | 7.54E-01 | -3.05  | 6.06E-03 | 0.59  | 8.33E-01 | M-1 |
| ENSMMUG000000021531 | ANP32E  | Acidic Nuclear<br>Phosphoprotein 32 Family<br>Member E                             | 14.56  | 27.10  | 17.36  | 21.41 | 0.76  | 1.08E-01 | -1.09  | 1.26E-02 | 0.55  | 4.81E-01 | M-1 |
| ENSMMUG000000021388 | CIART   | Circadian Associated<br>Repressor Of Transcription                                 | 43.70  | 19.31  | 6.49   | 1.04  | -1.78 | 1.51E-01 | -4.44  | 4.28E-05 | 0.70  | 8.03E-01 | M-1 |
| ENSMMUG000000010668 | GOLPH3L | Golgi Phosphoprotein 3<br>Like                                                     | 12.28  | 39.56  | 4.86   | 3.93  | 0.89  | 5.74E-01 | -3.23  | 9.48E-03 | 1.04  | 6.96E-01 | M-1 |
| ENSMMUG000000010067 | MINDY1  | MINDY Lysine 48<br>Deubiquitinase 1                                                | 0.29   | 0.61   | 0.08   | 0.65  | -0.51 | 8.02E-01 | -3.11  | 4.98E-02 | 2.52  | 2.63E-01 | M-1 |
| ENSMMUG000000010075 | MLLT11  | MLLT11, Transcription<br>Factor 7 Cofactor                                         | 20.79  | 19.73  | 1.84   | 1.28  | 0.22  | 9.16E-01 | -3.46  | 1.10E-02 | -0.07 | 9.89E-01 | M-1 |
| ENSMMUG000000008402 | GABPB2  | GA Binding Protein<br>Transcription Factor Beta<br>Subunit 2                       | 1.19   | 2.16   | 0.33   | 0.47  | 0.44  | 7.87E-01 | -5.28  | 5.34E-06 | 1.49  | 4.79E-01 | M-1 |
| ENSMMUG000000013170 | PI4KB   | Phosphatidylinositol 4-<br>kinase Beta                                             | 6.41   | 9.51   | 5.09   | 2.88  | 0.75  | 4.01E-01 | -1.59  | 3.99E-02 | 0.15  | 9.53E-01 | M-1 |
| ENSMMUG000000013172 |         |                                                                                    | 4.46   | 3.54   | 0.54   | 1.04  | -1.05 | 5.77E-01 | -4.02  | 9.01E-03 | 2.88  | 2.06E-01 | M-1 |
| ENSMMUG000000045008 | TCHH    | Trichohyalin                                                                       | 0.21   | 3.04   | 0.02   | 0.06  | 3.08  | 5.02E-02 | -7.56  | 4.84E-07 | 1.85  | 5.31E-01 | M-1 |
| ENSMMUG000000046382 | SNAPIN  | SNAP Associated Protein                                                            | 3.90   | 4.63   | 1.27   | 1.42  | 0.13  | 9.47E-01 | -2.70  | 4.31E-02 | 2.11  | 3.18E-01 | M-1 |
| ENSMMUG000000002696 | GATAD2B | GATA Zinc Finger Domain<br>Containing 2B                                           | 88.84  | 48.56  | 24.62  | 6.55  | -0.77 | 2.96E-01 | -1.67  | 8.36E-03 | -1.17 | 2.23E-01 | M-1 |

|                     |           |                                                                         |        |        |       |       |       |          |       |          |       |          |     |
|---------------------|-----------|-------------------------------------------------------------------------|--------|--------|-------|-------|-------|----------|-------|----------|-------|----------|-----|
| ENSMMUG00000016093  | ADAR      | Adenosine Deaminase, RNA Specific                                       | 56.24  | 33.16  | 10.79 | 10.57 | -1.06 | 1.03E-01 | -1.62 | 6.73E-03 | -0.26 | 8.70E-01 | M-1 |
| ENSMMUG00000021312  | SYT11     | Synaptotagmin 11                                                        | 3.91   | 5.06   | 0.85  | 0.17  | -1.66 | 3.26E-01 | -3.67 | 1.97E-02 | -1.26 | 7.20E-01 | M-1 |
| ENSMMUG00000004901  | SEMA4A    | Semaphorin 4A                                                           | 1.52   | 1.07   | 0.08  | 0.46  | -1.52 | 4.06E-01 | -4.25 | 7.10E-03 | 3.27  | 1.56E-01 | M-1 |
| ENSMMUG00000004902  | SLC25A44  | Solute Carrier Family 25 Member 44                                      | 23.27  | 18.98  | 7.33  | 5.45  | -0.26 | 7.54E-01 | -1.39 | 2.04E-02 | -0.75 | 4.75E-01 | M-1 |
| ENSMMUG00000004490  | IFI16     | Interferon Gamma Inducible Protein 16                                   | 0.56   | 0.79   | 0.01  | 0.43  | -0.86 | 7.69E-01 | -4.44 | 4.98E-02 | 3.32  | 3.61E-01 | M-1 |
| ENSMMUG000000042475 | PCP4L1    | Purkinje Cell Protein 4 Like 1                                          | 169.69 | 157.50 | 15.91 | 2.66  | 0.20  | 8.82E-01 | -3.79 | 6.23E-06 | -1.21 | 4.32E-01 | M-1 |
| ENSMMUG00000018525  | PSEN2     | Presenilin 2                                                            | 7.47   | 1.54   | 0.65  | 0.19  | -1.87 | 6.40E-02 | -5.04 | 1.19E-07 | 0.89  | 6.68E-01 | M-1 |
| ENSMMUG00000005129  | MIXL1     | Mix Paired-like Homeobox                                                | 11.31  | 5.00   | 0.70  | 2.05  | -1.64 | 2.75E-01 | -3.13 | 2.09E-02 | 0.74  | 8.20E-01 | M-1 |
| ENSMMUG000000042699 | SDE2      | SDE2 Telomere Maintenance Homolog                                       | 41.80  | 50.14  | 13.53 | 5.96  | 0.45  | 4.76E-01 | -2.02 | 4.17E-05 | -1.01 | 1.81E-01 | M-1 |
| ENSMMUG00000004379  | DUSP10    | Dual Specificity Phosphatase 10                                         | 78.94  | 54.08  | 6.61  | 0.78  | -0.63 | 5.34E-01 | -4.03 | 1.69E-07 | -1.93 | 8.79E-02 | M-1 |
| ENSMMUG00000010176  | DTL       | Denticleless E3 Ubiquitin Protein Ligase Homolog                        | 155.21 | 96.40  | 52.05 | 20.50 | -0.51 | 4.09E-01 | -1.13 | 3.20E-02 | -1.07 | 1.48E-01 | M-1 |
| ENSMMUG00000016102  | KCNH1     | Potassium Voltage-gated Channel Subfamily H Member 1                    | 9.99   | 11.00  | 1.25  | 1.25  | 0.32  | 8.35E-01 | -4.00 | 5.67E-05 | 0.31  | 9.20E-01 | M-1 |
| ENSMMUG000000047787 | C1H1orf74 | Chromosome 1 Open Reading Frame, Human C1orf74                          | 2.43   | 1.56   | 0.37  | 0.54  | -0.18 | 9.25E-01 | -2.60 | 3.79E-02 | 1.14  | 6.48E-01 | M-1 |
| ENSMMUG000000022170 | PFKFB2    | 6-phosphofructo-2-kinase/fructose-2,6-biphosphatase 2                   | 13.42  | 18.32  | 2.24  | 6.69  | -0.16 | 9.05E-01 | -2.49 | 3.09E-03 | 0.58  | 7.71E-01 | M-1 |
| ENSMMUG000000023567 | MAPKAPK2  | Mitogen-activated Protein Kinase-activated Protein Kinase 2             | 23.89  | 22.63  | 7.53  | 2.86  | -0.13 | 9.17E-01 | -2.04 | 8.06E-03 | -0.95 | 4.94E-01 | M-1 |
| ENSMMUG000000023566 | DYRK3     | Dual Specificity Tyrosine Phosphorylation Regulated Kinase 3            | 4.39   | 2.20   | 0.16  | 0.28  | -2.01 | 1.74E-01 | -3.83 | 5.47E-03 | 0.65  | 8.58E-01 | M-1 |
| ENSMMUG00000002528  | EIF2D     | Eukaryotic Translation Initiation Factor 2D                             | 8.20   | 10.33  | 0.50  | 1.25  | 0.08  | 9.64E-01 | -3.87 | 5.54E-04 | 1.54  | 4.53E-01 | M-1 |
| ENSMMUG00000018584  | NUAK2     | NUAK Family Kinase 2                                                    | 0.37   | 3.46   | 0.76  | 1.52  | 2.96  | 7.71E-02 | -4.42 | 5.15E-03 | 2.31  | 3.82E-01 | M-1 |
| ENSMMUG00000011236  | MDM4      | MDM4, P53 Regulator                                                     | 24.40  | 35.43  | 16.17 | 15.61 | 0.57  | 3.59E-01 | -1.48 | 4.69E-03 | 0.21  | 8.85E-01 | M-1 |
| ENSMMUG00000016563  | PIK3C2B   | Phosphatidylinositol-4-phosphate 3-kinase Catalytic Subunit Type 2 Beta | 12.73  | 5.76   | 1.57  | 3.27  | -1.29 | 2.77E-01 | -2.70 | 9.14E-03 | 0.56  | 8.27E-01 | M-1 |
| ENSMMUG000000046860 |           |                                                                         | 52.42  | 21.48  | 4.15  | 0.42  | -0.99 | 5.02E-01 | -5.73 | 9.47E-07 | -0.56 | 8.65E-01 | M-1 |
| ENSMMUG000000004268 | DDX59     | DEAD-box Helicase 59                                                    | 15.02  | 10.09  | 1.42  | 1.09  | -0.29 | 8.52E-01 | -4.29 | 1.75E-05 | 0.97  | 6.54E-01 | M-1 |
| ENSMMUG00000010474  | HMCN1     | Hemicentin 1                                                            | 26.78  | 12.54  | 0.92  | 0.16  | -1.50 | 1.10E-01 | -4.83 | 2.17E-09 | -1.19 | 4.26E-01 | M-1 |
| ENSMMUG000000031286 | IER5      | Immediate Early Response 5                                              | 2.36   | 2.18   | 0.47  | 0.78  | -1.14 | 5.47E-01 | -3.89 | 1.38E-02 | 3.68  | 9.33E-02 | M-1 |
| ENSMMUG00000012848  | XPR1      | Xenotropic And Polytropic Retrovirus Receptor 1                         | 32.30  | 21.09  | 12.95 | 3.90  | -0.20 | 8.73E-01 | -2.03 | 1.39E-02 | -0.05 | 9.87E-01 | M-1 |
| ENSMMUG00000016033  | TDRD5     | Tudor Domain Containing 5                                               | 5.71   | 2.44   | 0.36  | 0.16  | -2.15 | 8.67E-02 | -2.51 | 4.12E-02 | -1.76 | 3.85E-01 | M-1 |
| ENSMMUG000000006262 | ABL2      | ABL Proto-oncogene 2, Non-receptor Tyrosine Kinase                      | 7.64   | 5.83   | 3.59  | 3.25  | -0.15 | 9.05E-01 | -1.76 | 3.55E-02 | 1.14  | 4.14E-01 | M-1 |
| ENSMMUG000000005510 | TNFSF4    | TNF Superfamily Member 4                                                | 0.68   | 1.48   | 0.05  | 0.85  | -0.26 | 8.92E-01 | -3.77 | 2.16E-03 | 1.48  | 5.18E-01 | M-1 |
| ENSMMUG000000007280 | SUCO      | SUN Domain Containing Ossification Factor                               | 40.53  | 16.65  | 3.85  | 3.67  | -1.04 | 1.29E-01 | -2.32 | 1.22E-04 | 0.05  | 9.82E-01 | M-1 |
| ENSMMUG000000007273 | DNM3      | Dynamin 3                                                               | 6.35   | 5.44   | 1.26  | 0.36  | -0.31 | 8.51E-01 | -4.92 | 4.33E-06 | 0.02  | 9.97E-01 | M-1 |
| ENSMMUG000000000065 | CCDC181   | Coiled-coil Domain Containing 181                                       | 8.16   | 7.16   | 2.17  | 2.26  | -0.10 | 9.38E-01 | -2.04 | 1.50E-02 | 1.03  | 4.95E-01 | M-1 |
| ENSMMUG000000005283 | SFT2D2    | SFT2 Domain Containing 2                                                | 24.95  | 19.85  | 2.42  | 7.86  | -0.25 | 8.72E-01 | -3.45 | 5.05E-04 | 2.47  | 7.54E-02 | M-1 |
| ENSMMUG00000010395  | GPR161    | G Protein-coupled Receptor 161                                          | 3.61   | 1.35   | 0.02  | 0.18  | -2.62 | 5.19E-02 | -4.20 | 2.35E-03 | 0.48  | 9.02E-01 | M-1 |
| ENSMMUG000000023462 | ILDR2     | Immunoglobulin Like Domain Containing Receptor 2                        | 10.56  | 11.16  | 0.09  | 0.07  | -0.28 | 9.01E-01 | -9.33 | 2.08E-10 | 2.03  | 4.50E-01 | M-1 |

|                    |         |                                                                    |        |       |       |       |       |          |       |          |       |          |     |
|--------------------|---------|--------------------------------------------------------------------|--------|-------|-------|-------|-------|----------|-------|----------|-------|----------|-----|
| ENSMMUG00000015948 | MGST3   | Microsomal Glutathione S-transferase 3                             | 35.04  | 19.01 | 5.96  | 6.23  | -0.31 | 8.17E-01 | -3.07 | 7.55E-04 | 1.77  | 2.04E-01 | M-1 |
| ENSMMUG00000017722 |         |                                                                    | 4.58   | 17.69 | 4.25  | 3.01  | 1.69  | 1.63E-01 | -2.56 | 2.36E-02 | 0.55  | 8.53E-01 | M-1 |
| ENSMMUG00000041362 | GGPS1   | Geranylgeranyl Diphosphate Synthase 1                              | 17.24  | 17.89 | 8.90  | 2.63  | 0.22  | 7.95E-01 | -2.34 | 5.59E-05 | -0.52 | 6.85E-01 | M-1 |
| ENSMMUG00000015135 | HEATR1  | HEAT Repeat Containing 1                                           | 38.09  | 43.32 | 15.16 | 12.54 | 0.03  | 9.72E-01 | -1.43 | 2.01E-02 | -0.06 | 9.80E-01 | M-1 |
| ENSMMUG0000001060  | RYR2    | Ryanodine Receptor 2                                               | 1.85   | 1.26  | 0.17  | 0.26  | -0.43 | 7.46E-01 | -3.68 | 7.73E-05 | 1.36  | 4.16E-01 | M-1 |
| ENSMMUG00000002105 | ZP4     | Zona Pellucida Glycoprotein 4                                      | 170.65 | 98.18 | 15.23 | 2.93  | -1.21 | 2.74E-01 | -3.39 | 2.64E-04 | -1.03 | 5.76E-01 | M-1 |
| ENSMMUG00000008270 |         |                                                                    | 9.03   | 7.55  | 0.30  | 0.45  | 0.63  | 7.40E-01 | -5.98 | 2.19E-05 | -0.95 | 8.05E-01 | M-1 |
| ENSMMUG00000010729 | RGS7    | Regulator Of G Protein Signaling 7                                 | 8.92   | 2.62  | 0.24  | 0.04  | -2.00 | 2.03E-01 | -5.92 | 7.49E-05 | -1.95 | 4.73E-01 | M-1 |
| ENSMMUG00000004265 | PLD5    | Phospholipase D Family Member 5                                    | 3.74   | 3.79  | 0.55  | 0.46  | 0.23  | 9.00E-01 | -4.60 | 6.01E-05 | 2.06  | 2.65E-01 | M-1 |
| ENSMMUG00000019994 | SDCCAG8 | Serologically Defined Colon Cancer Antigen 8                       | 3.10   | 2.20  | 0.43  | 1.20  | 0.15  | 9.23E-01 | -3.08 | 1.59E-03 | 0.58  | 8.10E-01 | M-1 |
| ENSMMUG00000017324 | KIF26B  | Kinesin Family Member 26B                                          | 2.87   | 2.43  | 0.06  | 0.04  | -1.23 | 4.77E-01 | -5.06 | 3.39E-04 | -0.88 | 8.05E-01 | M-1 |
| ENSMMUG00000011380 | CNST    | Consortin, Connexin Sorting Protein                                | 24.35  | 20.23 | 9.35  | 8.29  | 0.23  | 8.04E-01 | -1.47 | 2.83E-02 | -0.17 | 9.37E-01 | M-1 |
| ENSMMUG00000005946 | NLRP3   | NLR Family Pyrin Domain Containing 3                               | 0.77   | 1.09  | 0.04  | 0.02  | 0.56  | 8.45E-01 | -5.37 | 8.30E-03 | -0.26 | 9.74E-01 | M-1 |
| ENSMMUG00000005955 | GCSAML  | Germinal Center Associated Signaling And Motility Like             | 2.85   | 4.01  | 0.17  | 0.80  | 0.10  | 9.71E-01 | -6.46 | 7.32E-04 | 3.31  | 2.69E-01 | M-1 |
| ENSMMUG00000017095 |         |                                                                    | 0.97   | 4.78  | 0.27  | 0.03  | 1.16  | 5.30E-01 | -4.20 | 7.55E-03 | -2.11 | 5.07E-01 | M-1 |
| ENSMMUG00000005566 |         |                                                                    | 3.40   | 3.22  | 0.25  | 0.02  | 0.25  | 9.23E-01 | -5.01 | 5.92E-03 | -4.30 | 1.11E-01 | M-1 |
| ENSMMUG00000045733 |         |                                                                    | 0.79   | 2.32  | 0.09  | 0.23  | 1.08  | 4.51E-01 | -6.37 | 2.56E-07 | 1.40  | 5.75E-01 | M-1 |
| ENSMMUG00000012609 | ROBO2   | Roundabout Guidance Receptor 2                                     | 1.45   | 0.70  | 0.05  | 0.03  | -1.51 | 2.75E-01 | -5.04 | 4.11E-05 | -0.77 | 8.03E-01 | M-1 |
| ENSMMUG00000002327 | ROBO1   | Roundabout Guidance Receptor 1                                     | 4.97   | 4.08  | 0.09  | 0.18  | -0.32 | 8.26E-01 | -5.29 | 2.16E-08 | 1.38  | 4.34E-01 | M-1 |
| ENSMMUG00000016244 | POU1F1  | POU Class 1 Homeobox 1                                             | 2.92   | 1.46  | 0.23  | 0.11  | -0.95 | 6.06E-01 | -4.07 | 6.20E-03 | 1.16  | 7.43E-01 | M-1 |
| ENSMMUG00000020335 | ARL13B  | ADP Ribosylation Factor Like GTPase 13B                            | 30.12  | 12.60 | 2.77  | 2.05  | -1.11 | 3.09E-01 | -3.13 | 6.69E-04 | 0.11  | 9.74E-01 | M-1 |
| ENSMMUG00000040940 |         |                                                                    | 5.45   | 7.28  | 1.91  | 1.90  | 0.16  | 8.92E-01 | -2.14 | 5.36E-03 | 0.50  | 7.91E-01 | M-1 |
| ENSMMUG00000005977 | GABRR3  | Gamma-aminobutyric Acid Type A Receptor Rho3 Subunit               | 44.87  | 26.77 | 1.46  | 0.34  | -1.44 | 2.27E-01 | -5.41 | 1.56E-07 | -1.08 | 6.32E-01 | M-1 |
| ENSMMUG00000017438 | DCBLD2  | Discoidin, CUB And LCCL Domain Containing 2                        | 28.14  | 17.02 | 2.25  | 2.41  | -0.27 | 8.36E-01 | -3.19 | 2.83E-04 | 0.85  | 6.50E-01 | M-1 |
| ENSMMUG00000042377 |         |                                                                    | 7.81   | 4.82  | 0.92  | 0.03  | -0.95 | 7.20E-01 | -9.31 | 5.28E-06 | 1.32  | 8.05E-01 | M-1 |
| ENSMMUG00000002865 | ABI3BP  | ABI Family Member 3 Binding Protein                                | 37.07  | 42.37 | 8.11  | 1.24  | 0.29  | 7.97E-01 | -3.57 | 2.21E-06 | -1.96 | 6.91E-02 | M-1 |
| ENSMMUG00000043192 |         |                                                                    | 59.08  | 19.44 | 0.45  | 0.38  | -2.25 | 8.17E-02 | -6.00 | 5.07E-07 | 1.03  | 7.12E-01 | M-1 |
| ENSMMUG00000015062 | CEP97   | Centrosomal Protein 97                                             | 36.21  | 56.56 | 8.09  | 4.88  | 0.25  | 8.01E-01 | -2.88 | 1.28E-05 | -0.48 | 7.68E-01 | M-1 |
| ENSMMUG00000021859 | ZPLD1   | Zona Pellucida Like Domain Containing 1                            | 1.51   | 2.23  | 0.06  | 0.01  | -1.32 | 5.98E-01 | -5.52 | 7.45E-03 | -1.64 | 7.27E-01 | M-1 |
| ENSMMUG00000020714 | POLR2K  | RNA Polymerase II Subunit K                                        | 51.25  | 76.34 | 54.54 | 21.51 | 0.42  | 6.00E-01 | -1.43 | 2.44E-02 | -0.23 | 8.99E-01 | M-1 |
| ENSMMUG00000019977 |         |                                                                    | 21.48  | 8.14  | 1.07  | 0.14  | -1.69 | 1.33E-01 | -3.95 | 6.51E-05 | -1.27 | 5.00E-01 | M-1 |
| ENSMMUG00000000692 | PLCXD2  | Phosphatidylinositol Specific Phospholipase CX Domain Containing 2 | 2.61   | 2.14  | 0.40  | 2.76  | 0.24  | 8.89E-01 | -3.01 | 7.75E-03 | 2.44  | 1.28E-01 | M-1 |
| ENSMMUG00000003061 | CCDC80  | Coiled-coil Domain Containing 80                                   | 3.42   | 5.56  | 0.25  | 0.17  | -0.63 | 7.74E-01 | -6.66 | 1.23E-05 | 2.46  | 3.42E-01 | M-1 |
| ENSMMUG00000013443 | BOC     | BOC Cell Adhesion Associated, Oncogene Regulated                   | 1.66   | 0.17  | 0.02  | 0.02  | -2.29 | 2.53E-01 | -5.99 | 1.74E-03 | 0.65  | 9.07E-01 | M-1 |
| ENSMMUG00000013451 | SPICE1  | Spindle And Centriole Associated Protein 1                         | 5.60   | 5.93  | 1.88  | 1.58  | 0.21  | 8.22E-01 | -1.54 | 1.84E-02 | -0.06 | 9.81E-01 | M-1 |
| ENSMMUG00000001949 | CCDC191 | Coiled-coil Domain Containing 191                                  | 3.36   | 2.36  | 0.61  | 0.31  | -1.47 | 1.31E-01 | -2.44 | 6.88E-03 | -0.28 | 9.17E-01 | M-1 |
| ENSMMUG00000008075 | IGSF11  | Immunoglobulin Superfamily Member 11                               | 38.14  | 17.92 | 3.36  | 0.15  | -1.47 | 2.80E-01 | -4.99 | 1.85E-05 | -1.12 | 6.81E-01 | M-1 |
| ENSMMUG00000000912 | CD86    | CD86 Molecule                                                      | 4.99   | 1.62  | 0.11  | 0.09  | -3.21 | 9.84E-02 | -5.00 | 1.42E-02 | 0.03  | 9.97E-01 | M-1 |

|                      |          |                                                               |        |        |        |       |       |          |        |          |       |          |     |
|----------------------|----------|---------------------------------------------------------------|--------|--------|--------|-------|-------|----------|--------|----------|-------|----------|-----|
| ENSMMUG00000007702   | SEC22A   | SEC22 Homolog A, Vesicle Trafficking Protein                  | 21.26  | 18.03  | 2.55   | 2.88  | 0.39  | 7.91E-01 | -4.35  | 1.18E-05 | 1.17  | 5.54E-01 | M-1 |
| ENSMMUG00000002230   | ADCY5    | Adenylate Cyclase 5                                           | 1.96   | 0.90   | 0.16   | 0.03  | -2.31 | 8.96E-02 | -3.23  | 1.49E-02 | -1.44 | 5.71E-01 | M-1 |
| ENSMMUG00000014818   | MYLK     | Myosin Light Chain Kinase                                     | 9.62   | 3.84   | 0.30   | 0.32  | -1.45 | 2.32E-01 | -4.40  | 1.83E-05 | 0.53  | 8.50E-01 | M-1 |
| ENSMMUG00000003851   | KALRN    | Kalirin RhoGEF Kinase                                         | 20.19  | 8.69   | 1.84   | 1.84  | -1.14 | 2.23E-01 | -3.52  | 8.45E-06 | 1.29  | 3.36E-01 | M-1 |
| ENSMMUG000000048732  | SLC12A8  | Solute Carrier Family 12 Member 8                             | 2.60   | 1.61   | 0.09   | 0.10  | -1.03 | 4.81E-01 | -4.83  | 8.89E-05 | -0.38 | 9.20E-01 | M-1 |
| ENSMMUG000000046064  |          |                                                               | 66.00  | 314.47 | 74.47  | 42.35 | 1.77  | 1.13E-01 | -2.37  | 2.35E-02 | 0.78  | 7.35E-01 | M-1 |
| ENSMMUG000000006343  |          |                                                               | 8.17   | 3.20   | 0.12   | 0.09  | -2.01 | 8.11E-02 | -4.21  | 1.26E-04 | -0.74 | 7.97E-01 | M-1 |
| ENSMMUG000000019799  | GP9      | Glycoprotein IX Platelet                                      | 32.86  | 14.91  | 1.11   | 0.12  | -1.60 | 1.84E-01 | -4.53  | 3.60E-05 | -2.27 | 2.09E-01 | M-1 |
| ENSMMUG000000011585  | CNBP     | CCHC-type Zinc Finger Nucleic Acid Binding Protein            | 128.63 | 310.37 | 146.47 | 75.00 | 1.10  | 9.18E-02 | -1.66  | 5.59E-03 | -0.66 | 5.68E-01 | M-1 |
| ENSMMUG000000016793  | TMCC1    | Transmembrane And Coiled-coil Domain Family 1                 | 66.41  | 35.13  | 8.51   | 3.85  | -0.89 | 2.71E-01 | -2.83  | 3.01E-05 | 0.14  | 9.59E-01 | M-1 |
| ENSMMUG000000001339  | CAND2    | Cullin Associated And Neddylation Dissociated 2 (putative)    | 2.49   | 1.09   | 0.40   | 0.02  | -2.61 | 1.40E-01 | -3.67  | 3.55E-02 | -3.42 | 1.72E-01 | M-1 |
| ENSMMUG000000001120  |          |                                                               | 5.61   | 7.69   | 0.44   | 0.10  | -0.69 | 6.78E-01 | -3.14  | 1.27E-02 | -2.86 | 1.04E-01 | M-1 |
| ENSMMUG000000045652  | BRK1     | BRICK1, SCAR/WAVE Actin Nucleating Complex Subunit            | 14.81  | 21.93  | 8.19   | 13.49 | 0.46  | 4.71E-01 | -1.32  | 1.34E-02 | 0.52  | 6.22E-01 | M-1 |
| ENSMMUG000000011231  | GRM7     | Glutamate Metabotropic Receptor 7                             | 9.92   | 4.10   | 0.56   | 0.07  | -1.34 | 3.49E-01 | -3.85  | 1.68E-03 | -2.78 | 1.43E-01 | M-1 |
| ENSMMUG000000000938  | LRRN1    | Leucine Rich Repeat Neuronal 1                                | 11.85  | 4.65   | 0.84   | 0.30  | -1.00 | 3.55E-01 | -2.89  | 1.36E-03 | -0.95 | 5.98E-01 | M-1 |
| ENSMMUG000000012661  | PDZRN3   | PDZ Domain Containing Ring Finger 3                           | 2.81   | 1.43   | 0.26   | 0.06  | -0.22 | 9.17E-01 | -4.59  | 4.89E-04 | -1.08 | 7.21E-01 | M-1 |
| ENSMMUG000000008628  | LMOD3    | Leiomodin 3                                                   | 63.79  | 41.60  | 2.95   | 0.31  | -0.74 | 4.90E-01 | -4.66  | 1.86E-08 | -2.02 | 1.04E-01 | M-1 |
| ENSMMUG000000046166  |          |                                                               | 5.06   | 5.36   | 0.75   | 4.44  | 0.44  | 8.57E-01 | -3.55  | 3.73E-02 | 2.75  | 2.92E-01 | M-1 |
| ENSMMUG000000000265  | ADAMTS9  | ADAM Metallopeptidase With Thrombospondin Type 1 Motif9       | 21.23  | 12.13  | 1.40   | 0.13  | -1.57 | 1.17E-01 | -4.05  | 4.67E-06 | -1.94 | 1.66E-01 | M-1 |
| ENSMMUG0000000031902 | CADPS    | Calcium Dependent Secretion Activator                         | 2.00   | 1.51   | 0.52   | 0.17  | -0.63 | 7.24E-01 | -3.45  | 8.99E-03 | 0.77  | 8.12E-01 | M-1 |
| ENSMMUG000000006432  | PXK      | PX Domain Containing Serine/threonine Kinase Like             | 22.03  | 13.78  | 2.63   | 4.60  | -1.04 | 2.58E-01 | -2.32  | 3.80E-03 | 0.15  | 9.61E-01 | M-1 |
| ENSMMUG000000015322  | DNAH12   | Dynein Axonemal Heavy Chain 12                                | 5.56   | 2.87   | 1.55   | 0.43  | -0.84 | 3.89E-01 | -2.35  | 4.14E-03 | -0.87 | 5.87E-01 | M-1 |
| ENSMMUG0000000021008 | ASB14    | Ankyrin Repeat And SOCS Box Containing 14                     | 0.53   | 1.35   | 0.34   | 0.13  | 1.67  | 2.84E-01 | -3.98  | 5.95E-03 | 0.26  | 9.64E-01 | M-1 |
| ENSMMUG000000016602  | IL17RD   | Interleukin 17 Receptor D                                     | 6.05   | 6.09   | 0.11   | 0.28  | -1.86 | 1.76E-01 | -4.90  | 1.06E-04 | 0.27  | 9.52E-01 | M-1 |
| ENSMMUG000000010163  | ARHGEF3  | Rho Guanine Nucleotide Exchange Factor 3                      | 34.86  | 31.15  | 4.95   | 1.93  | -0.26 | 8.24E-01 | -3.37  | 1.02E-05 | -0.54 | 7.75E-01 | M-1 |
| ENSMMUG000000021620  | ERC2     | ELKS/RAB6-interacting/CAST Family Member 2                    | 1.94   | 1.75   | 0.54   | 0.35  | -0.64 | 6.62E-01 | -3.21  | 3.66E-03 | 0.98  | 6.79E-01 | M-1 |
| ENSMMUG0000000039456 |          |                                                               | 3.70   | 2.50   | 1.20   | 0.00  | -8.69 | 5.33E-02 | -18.20 | 1.11E-05 | 5.09  | 5.29E-01 | M-1 |
| ENSMMUG000000011208  | DCP1A    | Decapping MRNA 1A                                             | 27.79  | 16.37  | 9.29   | 5.22  | -0.97 | 1.71E-01 | -1.38  | 3.49E-02 | -0.48 | 7.33E-01 | M-1 |
| ENSMMUG000000005619  | NISCH    | Nischarin                                                     | 10.96  | 8.59   | 2.62   | 2.55  | -0.47 | 7.02E-01 | -2.83  | 1.73E-03 | 0.47  | 8.41E-01 | M-1 |
| ENSMMUG000000027061  | MIRLET7G | MicroRNA Let-7g                                               | 1.32   | 15.83  | 9.82   | 5.91  | 4.24  | 1.41E-01 | -5.95  | 3.33E-02 | 2.60  | 6.25E-01 | M-1 |
| ENSMMUG000000005596  | ALAS1    | 5'-aminolevulinatase Synthase 1                               | 159.36 | 40.41  | 6.39   | 4.08  | -1.72 | 5.36E-02 | -3.23  | 6.40E-05 | -0.30 | 9.02E-01 | M-1 |
| ENSMMUG000000005300  |          |                                                               | 44.32  | 45.93  | 8.46   | 4.22  | 0.07  | 9.61E-01 | -3.40  | 2.32E-04 | 0.00  | 1.00E+00 | M-1 |
| ENSMMUG000000007022  | CACNA2D2 | Calcium Voltage-gated Channel Auxiliary Subunit Alpha2delta 2 | 3.91   | 7.16   | 0.13   | 0.10  | -0.31 | 8.54E-01 | -6.18  | 1.31E-08 | -0.21 | 9.63E-01 | M-1 |
| ENSMMUG000000020120  | NAT6     | N-acetyltransferase 6                                         | 0.88   | 2.51   | 0.29   | 0.86  | 1.69  | 3.72E-01 | -5.36  | 1.06E-03 | 3.83  | 9.56E-02 | M-1 |
| ENSMMUG0000000031780 | NICN1    | Nicolin 1                                                     | 2.30   | 6.70   | 1.18   | 3.08  | 1.93  | 1.51E-01 | -2.86  | 2.08E-02 | 1.54  | 4.78E-01 | M-1 |
| ENSMMUG000000014720  | NCKIPSD  | NCK Interacting Protein With SH3 Domain                       | 5.52   | 9.68   | 1.14   | 1.94  | 1.76  | 2.46E-01 | -4.72  | 2.53E-04 | 1.57  | 5.23E-01 | M-1 |
| ENSMMUG000000043325  | TMEM89   | Transmembrane Protein 89                                      | 0.49   | 1.03   | 0.14   | 0.41  | 0.45  | 8.18E-01 | -4.19  | 2.78E-03 | 3.42  | 6.49E-02 | M-1 |

|                    |           |                                                                        |        |       |       |       |       |          |       |          |       |          |     |
|--------------------|-----------|------------------------------------------------------------------------|--------|-------|-------|-------|-------|----------|-------|----------|-------|----------|-----|
| ENSMMUG0000003823  | MAP4      | Microtubule Associated Protein 4                                       | 28.03  | 25.52 | 11.76 | 18.77 | -0.23 | 7.45E-01 | -1.13 | 3.41E-02 | 0.13  | 9.39E-01 | M-1 |
| ENSMMUG00000031732 | CSPG5     | Chondroitin Sulfate Proteoglycan 5                                     | 0.46   | 1.64  | 0.25  | 0.16  | 0.74  | 7.54E-01 | -5.44 | 2.01E-03 | 1.52  | 6.80E-01 | M-1 |
| ENSMMUG00000014046 | SCAP      | SREBF Chaperone                                                        | 9.52   | 7.59  | 3.53  | 2.11  | -0.12 | 9.17E-01 | -2.26 | 2.71E-03 | 0.07  | 9.79E-01 | M-1 |
| ENSMMUG00000014045 | PTPN23    | Protein Tyrosine Phosphatase, Non-receptor Type 23                     | 2.01   | 9.58  | 2.65  | 3.93  | 1.99  | 5.56E-02 | -2.24 | 2.59E-02 | 0.60  | 8.03E-01 | M-1 |
| ENSMMUG00000010516 | LZTFL1    | Leucine Zipper Transcription Factor Like 1                             | 31.28  | 11.69 | 1.75  | 2.25  | -1.53 | 8.63E-02 | -3.22 | 6.17E-05 | 1.21  | 3.93E-01 | M-1 |
| ENSMMUG00000017585 | ZNF197    | Zinc Finger Protein 197                                                | 0.97   | 1.68  | 0.45  | 0.80  | 0.49  | 6.30E-01 | -2.16 | 5.30E-03 | 1.33  | 2.71E-01 | M-1 |
| ENSMMUG0000001029  | ANO10     | Anoctamin 10                                                           | 24.21  | 17.85 | 3.75  | 4.60  | -0.59 | 5.69E-01 | -3.10 | 1.02E-04 | 0.25  | 9.19E-01 | M-1 |
| ENSMMUG00000014627 | CTNNB1    | Catenin Beta 1                                                         | 52.15  | 30.06 | 14.72 | 32.86 | -0.57 | 4.45E-01 | -1.39 | 2.91E-02 | 1.13  | 2.30E-01 | M-1 |
| ENSMMUG00000040036 | EIF1B     | Eukaryotic Translation Initiation Factor 1B                            | 11.04  | 18.94 | 6.47  | 3.34  | 0.83  | 2.55E-01 | -2.04 | 1.08E-03 | -0.61 | 6.41E-01 | M-1 |
| ENSMMUG00000017701 | MYRIP     | Myosin VIIA And Rab Interacting Protein                                | 7.54   | 3.35  | 0.35  | 0.16  | -1.67 | 9.61E-02 | -4.39 | 1.32E-06 | 0.12  | 9.73E-01 | M-1 |
| ENSMMUG00000022532 | EPM2AIP1  | EPM2A Interacting Protein 1                                            | 3.88   | 13.76 | 2.61  | 1.99  | 1.71  | 1.64E-01 | -3.30 | 2.61E-03 | 0.52  | 8.59E-01 | M-1 |
| ENSMMUG00000017564 | TBCCD1    | TBCC Domain Containing 1                                               | 0.71   | 3.58  | 1.93  | 1.00  | 2.11  | 6.19E-02 | -2.43 | 2.65E-02 | 0.73  | 7.71E-01 | M-1 |
| ENSMMUG00000013610 | ETV5      | ETS Variant 5                                                          | 22.43  | 11.34 | 2.40  | 1.10  | -1.16 | 3.30E-01 | -3.00 | 3.04E-03 | -1.09 | 5.80E-01 | M-1 |
| ENSMMUG00000000430 | C2H3orf70 | Chromosome 2 C3orf70 Homolog                                           | 8.30   | 26.51 | 0.23  | 0.18  | 1.15  | 5.65E-01 | -5.60 | 3.85E-04 | -1.38 | 7.07E-01 | M-1 |
| ENSMMUG00000003594 | USP13     | Ubiquitin Specific Peptidase 13                                        | 2.87   | 4.32  | 2.02  | 0.37  | 0.74  | 6.02E-01 | -2.52 | 2.64E-02 | -2.54 | 1.06E-01 | M-1 |
| ENSMMUG00000005188 | PIK3CA    | Phosphatidylinositol-4,5-bisphosphate 3-kinase Catalytic Subunit Alpha | 28.35  | 14.87 | 6.26  | 4.47  | -0.68 | 5.07E-01 | -2.25 | 6.47E-03 | -0.60 | 7.53E-01 | M-1 |
| ENSMMUG00000004671 | NLGN1     | Neurologin 1                                                           | 0.36   | 2.22  | 0.25  | 0.01  | -0.56 | 8.58E-01 | -4.84 | 3.12E-02 | -3.58 | 3.08E-01 | M-1 |
| ENSMMUG00000022196 | GPR160    | G Protein-coupled Receptor 160                                         | 39.10  | 18.83 | 4.99  | 2.56  | -1.27 | 1.81E-01 | -2.64 | 1.70E-03 | -0.11 | 9.73E-01 | M-1 |
| ENSMMUG00000023337 | PFN2      | Profilin 2                                                             | 76.65  | 50.89 | 18.15 | 17.85 | -0.48 | 6.40E-01 | -2.67 | 5.55E-04 | 1.16  | 3.89E-01 | M-1 |
| ENSMMUG00000017239 | MED12L    | Mediator Complex Subunit 12 Like                                       | 9.65   | 7.06  | 2.22  | 1.04  | -0.49 | 6.34E-01 | -1.74 | 3.20E-02 | -0.54 | 7.71E-01 | M-1 |
| ENSMMUG00000018341 | PLCH1     | Phospholipase C Eta 1                                                  | 7.71   | 2.02  | 0.64  | 0.08  | -2.13 | 8.30E-02 | -3.48 | 2.32E-03 | -1.96 | 2.88E-01 | M-1 |
| ENSMMUG00000042616 |           |                                                                        | 2.09   | 1.17  | 0.24  | 0.28  | -0.59 | 6.86E-01 | -2.36 | 4.37E-02 | 0.74  | 7.91E-01 | M-1 |
| ENSMMUG00000000366 | TIPARP    | TCDD Inducible Poly(ADP-ribose) Polymerase                             | 44.55  | 28.06 | 6.74  | 2.30  | -1.03 | 3.62E-01 | -3.70 | 6.16E-05 | 0.09  | 9.81E-01 | M-1 |
| ENSMMUG00000004958 | MLF1      | Myeloid Leukemia Factor 1                                              | 10.49  | 10.93 | 6.60  | 1.03  | 0.24  | 8.73E-01 | -3.10 | 1.50E-03 | -0.42 | 8.82E-01 | M-1 |
| ENSMMUG00000010488 | COQ10B    | Coenzyme Q10B                                                          | 38.21  | 21.99 | 12.88 | 6.48  | -0.26 | 8.10E-01 | -2.15 | 3.80E-03 | 0.32  | 8.76E-01 | M-1 |
| ENSMMUG00000008643 | GTF3C3    | General Transcription Factor IIIC Subunit 3                            | 75.68  | 58.52 | 16.17 | 25.87 | -0.49 | 5.86E-01 | -1.74 | 1.50E-02 | 0.87  | 4.94E-01 | M-1 |
| ENSMMUG00000015970 | CCDC150   | Coiled-coil Domain Containing 150                                      | 6.49   | 7.93  | 1.76  | 0.70  | 0.71  | 4.55E-01 | -3.04 | 5.40E-05 | 0.02  | 9.95E-01 | M-1 |
| ENSMMUG00000005622 | DNAH7     | Dynein Axonemal Heavy Chain 7                                          | 2.76   | 3.03  | 0.64  | 0.14  | -0.21 | 8.74E-01 | -2.97 | 4.58E-04 | -2.12 | 7.54E-02 | M-1 |
| ENSMMUG00000005621 | SLC39A10  | Solute Carrier Family 39 Member 10                                     | 48.48  | 36.49 | 9.96  | 12.42 | -0.17 | 8.21E-01 | -2.65 | 7.96E-08 | 0.98  | 2.15E-01 | M-1 |
| ENSMMUG00000021755 | PLSCR1    | Phospholipid Scramblase 1                                              | 0.89   | 0.14  | 0.85  | 1.18  | -2.58 | 8.73E-02 | -3.19 | 4.79E-02 | 3.54  | 7.03E-02 | M-1 |
| ENSMMUG00000009694 | SLC9A9    | Solute Carrier Family 9 Member A9                                      | 11.29  | 3.20  | 0.80  | 0.11  | -2.39 | 6.51E-02 | -3.84 | 2.24E-03 | -1.61 | 4.98E-01 | M-1 |
| ENSMMUG00000019697 | PXYLP1    | 2-phosphoxylose Phosphatase 1                                          | 11.53  | 6.77  | 0.86  | 0.27  | -0.79 | 5.04E-01 | -4.53 | 8.02E-07 | -1.28 | 4.63E-01 | M-1 |
| ENSMMUG00000021392 |           |                                                                        | 12.11  | 22.42 | 0.70  | 0.17  | -0.04 | 9.85E-01 | -5.98 | 2.21E-06 | -1.47 | 5.45E-01 | M-1 |
| ENSMMUG00000000287 | NMNAT3    | Nicotinamide Nucleotide Adenylyltransferase 3                          | 4.43   | 3.08  | 0.56  | 0.34  | -1.40 | 4.29E-01 | -4.58 | 1.90E-03 | 1.51  | 6.05E-01 | M-1 |
| ENSMMUG00000000290 | RBP1      | Retinol Binding Protein 1                                              | 41.81  | 24.51 | 0.50  | 0.41  | -0.54 | 7.72E-01 | -5.28 | 6.91E-05 | 0.86  | 8.03E-01 | M-1 |
| ENSMMUG00000007757 | ESYT3     | Extended Synaptotagmin 3                                               | 5.41   | 1.65  | 0.16  | 0.18  | -1.66 | 2.10E-01 | -3.55 | 2.75E-03 | 0.09  | 9.84E-01 | M-1 |
| ENSMMUG00000021285 | ARMC8     | Armadillo Repeat Containing 8                                          | 41.39  | 18.13 | 10.22 | 7.25  | -1.07 | 5.57E-02 | -1.49 | 4.49E-03 | 0.11  | 9.56E-01 | M-1 |
| ENSMMUG00000019854 | TMEM108   | Transmembrane Protein 108                                              | 10.50  | 5.72  | 0.55  | 0.06  | -1.72 | 1.10E-01 | -4.04 | 5.57E-05 | -2.48 | 1.30E-01 | M-1 |
| ENSMMUG00000003277 | CPNE4     | Copine 4                                                               | 1.58   | 0.90  | 0.19  | 0.04  | -0.97 | 6.10E-01 | -3.17 | 4.46E-02 | -1.50 | 6.33E-01 | M-1 |
| ENSMMUG00000011361 | DAZL      | Deleted In Azoospermia Like                                            | 100.46 | 51.96 | 16.24 | 1.10  | -0.82 | 4.40E-01 | -3.85 | 4.19E-06 | -1.58 | 2.41E-01 | M-1 |

|                     |         |                                                         |        |        |        |       |       |          |       |          |       |          |     |
|---------------------|---------|---------------------------------------------------------|--------|--------|--------|-------|-------|----------|-------|----------|-------|----------|-----|
| ENSMMUG00000019009  | SATB1   | SATB Homeobox 1                                         | 4.87   | 25.02  | 3.63   | 1.11  | 1.72  | 6.20E-02 | -3.64 | 1.22E-05 | -1.57 | 2.39E-01 | M-1 |
| ENSMMUG00000006992  | RAB5A   | RAB5A, Member RAS Oncogene Family                       | 58.93  | 66.22  | 32.21  | 19.63 | 0.27  | 7.79E-01 | -1.91 | 4.34E-03 | 0.22  | 9.11E-01 | M-1 |
| ENSMMUG00000046095  |         |                                                         | 17.95  | 3.29   | 2.53   | 0.10  | -1.74 | 3.66E-01 | -4.56 | 1.07E-02 | -2.62 | 3.88E-01 | M-1 |
| ENSMMUG00000007371  | TOP2B   | DNA Topoisomerase II Beta                               | 106.16 | 66.67  | 26.10  | 30.57 | -0.71 | 3.74E-01 | -1.86 | 5.19E-03 | 1.20  | 2.39E-01 | M-1 |
| ENSMMUG000000019324 | NEK10   | NIMA Related Kinase 10                                  | 1.94   | 2.84   | 0.27   | 0.06  | 0.35  | 8.75E-01 | -3.42 | 2.36E-02 | -2.53 | 3.00E-01 | M-1 |
| ENSMMUG000000019327 | SLC4A7  | Solute Carrier Family 4 Member 7                        | 12.00  | 12.22  | 2.46   | 1.73  | -0.10 | 9.38E-01 | -2.62 | 8.17E-04 | -1.16 | 3.94E-01 | M-1 |
| ENSMMUG000000031449 | ZCWPW2  | Zinc Finger CW-type And PWWP Domain Containing 2        | 1.75   | 0.35   | 0.99   | 0.19  | -1.76 | 2.64E-01 | -3.52 | 2.36E-02 | 2.43  | 3.12E-01 | M-1 |
| ENSMMUG00000004404  | RBMS3   | RNA Binding Motif Single Stranded Interacting Protein 3 | 1.36   | 0.30   | 0.45   | 0.06  | -2.87 | 1.11E-01 | -3.67 | 4.46E-02 | -0.04 | 9.96E-01 | M-1 |
| ENSMMUG000000008610 | OSBPL10 | Oxysterol Binding Protein Like 10                       | 49.50  | 40.40  | 4.43   | 0.85  | -0.19 | 9.00E-01 | -4.23 | 3.46E-06 | -1.09 | 5.52E-01 | M-1 |
| ENSMMUG000000039767 |         |                                                         | 0.80   | 14.27  | 0.08   | 0.00  | 3.54  | 1.60E-01 | -7.49 | 1.54E-03 | 2.17  | 6.79E-01 | M-1 |
| ENSMMUG000000003702 | EIF4A2  | Eukaryotic Translation Initiation Factor 4A2            | 243.99 | 295.21 | 102.81 | 84.23 | 0.12  | 8.75E-01 | -1.61 | 7.69E-04 | -0.25 | 8.38E-01 | M-1 |
| ENSMMUG000000040213 | TPRG1   | Tumor Protein P63 Regulated 1                           | 3.46   | 5.14   | 0.72   | 0.08  | -0.31 | 8.69E-01 | -3.96 | 1.54E-03 | -3.23 | 6.11E-02 | M-1 |
| ENSMMUG000000016466 | TP63    | Tumor Protein P63                                       | 23.79  | 33.43  | 0.88   | 0.29  | -0.08 | 9.62E-01 | -6.73 | 1.09E-12 | 0.37  | 9.00E-01 | M-1 |
| ENSMMUG000000015330 | CCDC50  | Coiled-coil Domain Containing 50                        | 384.80 | 153.64 | 44.58  | 28.11 | -1.30 | 5.53E-02 | -1.98 | 1.67E-03 | -0.40 | 7.99E-01 | M-1 |
| ENSMMUG000000039446 | HES1    | Hes Family BHLH Transcription Factor 1                  | 1.06   | 1.42   | 0.80   | 0.52  | 1.10  | 6.17E-01 | -5.58 | 1.56E-03 | 1.44  | 7.07E-01 | M-1 |
| ENSMMUG00000004035  | RNF168  | Ring Finger Protein 168                                 | 34.31  | 58.95  | 13.86  | 14.59 | 0.50  | 2.73E-01 | -1.82 | 1.65E-06 | 0.06  | 9.67E-01 | M-1 |
| ENSMMUG000000006623 |         |                                                         | 4.22   | 5.61   | 1.62   | 3.29  | -0.25 | 8.53E-01 | -1.93 | 3.84E-02 | 1.25  | 4.25E-01 | M-1 |
| ENSMMUG000000000051 | LMLN    | Leishmanolysin Like Peptidase                           | 0.97   | 1.49   | 1.17   | 1.77  | 0.00  | 9.99E-01 | -2.39 | 4.49E-02 | 2.55  | 1.10E-01 | M-1 |
| ENSMMUG000000012624 | PCGF3   | Polycomb Group Ring Finger 3                            | 18.74  | 30.62  | 6.84   | 5.94  | 0.25  | 8.34E-01 | -2.30 | 3.92E-03 | 0.11  | 9.69E-01 | M-1 |
| ENSMMUG000000017221 | TMEM175 | Transmembrane Protein 175                               | 4.16   | 2.81   | 0.33   | 0.78  | -0.36 | 8.21E-01 | -3.63 | 8.04E-04 | 1.61  | 4.00E-01 | M-1 |
| ENSMMUG000000032300 | FGFRL1  | Fibroblast Growth Factor Receptor Like 1                | 11.65  | 11.77  | 3.62   | 0.90  | -0.62 | 6.15E-01 | -2.92 | 2.01E-03 | -1.17 | 5.10E-01 | M-1 |
| ENSMMUG000000011191 | TACC3   | Transforming Acidic Coiled-coil Containing Protein 3    | 75.28  | 97.07  | 11.90  | 10.75 | 0.68  | 4.83E-01 | -4.16 | 1.73E-08 | 0.66  | 6.94E-01 | M-1 |
| ENSMMUG000000046942 | NSD2    | Nuclear Receptor Binding SET Domain Protein 2           | 20.75  | 20.11  | 4.19   | 4.33  | 0.09  | 9.22E-01 | -2.77 | 3.81E-07 | 0.42  | 7.51E-01 | M-1 |
| ENSMMUG000000009944 | NELFA   | Negative Elongation Factor Complex Member A             | 20.02  | 25.46  | 6.20   | 4.85  | 0.33  | 7.64E-01 | -2.18 | 5.10E-03 | 0.00  | 9.99E-01 | M-1 |
| ENSMMUG000000007948 | RNF4    | Ring Finger Protein 4                                   | 35.14  | 59.67  | 31.11  | 29.13 | 0.51  | 4.05E-01 | -1.16 | 2.60E-02 | 0.10  | 9.56E-01 | M-1 |
| ENSMMUG000000013158 | FAM193A | Family With Sequence Similarity 193 Member A            | 91.38  | 79.78  | 13.08  | 10.79 | -0.47 | 6.39E-01 | -2.83 | 1.31E-04 | -0.17 | 9.51E-01 | M-1 |
| ENSMMUG000000023394 | ZBTB49  | Zinc Finger And BTB Domain Containing 49                | 34.91  | 29.39  | 0.78   | 1.78  | -0.30 | 8.56E-01 | -5.22 | 6.38E-07 | 1.21  | 5.69E-01 | M-1 |
| ENSMMUG000000020203 | NSG1    | Neuronal Vesicle Trafficking Associated 1               | 1.97   | 7.30   | 0.99   | 0.59  | 1.16  | 4.59E-01 | -3.47 | 7.12E-03 | 0.61  | 8.59E-01 | M-1 |
| ENSMMUG000000013414 | WFS1    | Wolframin ER Transmembrane Glycoprotein                 | 7.91   | 12.47  | 1.22   | 1.98  | 0.91  | 4.41E-01 | -3.36 | 3.90E-04 | 0.86  | 6.79E-01 | M-1 |
| ENSMMUG000000013416 | PPP2R2C | Protein Phosphatase 2 Regulatory Subunit Bgamma         | 3.50   | 1.99   | 0.79   | 0.02  | -0.69 | 6.70E-01 | -5.89 | 2.38E-06 | -1.09 | 7.18E-01 | M-1 |
| ENSMMUG000000017000 | TBC1D14 | TBC1 Domain Family Member 14                            | 49.97  | 45.17  | 7.23   | 10.23 | -0.16 | 8.88E-01 | -2.90 | 3.57E-05 | 0.56  | 7.31E-01 | M-1 |
| ENSMMUG000000013984 | ABLIM2  | Actin Binding LIM Protein Family Member 2               | 1.43   | 0.68   | 0.11   | 0.03  | -2.98 | 1.40E-01 | -6.70 | 7.69E-04 | 1.05  | 8.40E-01 | M-1 |
| ENSMMUG000000022672 | HTRA3   | HtrA Serine Peptidase 3                                 | 11.06  | 35.70  | 0.80   | 0.11  | 1.36  | 4.27E-01 | -6.58 | 2.05E-06 | -1.52 | 6.22E-01 | M-1 |
| ENSMMUG000000017670 | PACRGL  | Parkin Coregulated Like                                 | 535.23 | 343.26 | 139.65 | 12.73 | -0.79 | 4.31E-01 | -3.79 | 1.59E-06 | -0.22 | 9.33E-01 | M-1 |
| ENSMMUG000000030380 | KCNIP4  | Potassium Voltage-gated Channel Interacting Protein 4   | 18.11  | 7.82   | 1.19   | 0.72  | -0.90 | 4.41E-01 | -3.79 | 5.50E-05 | 0.43  | 8.70E-01 | M-1 |
| ENSMMUG00000004785  | CCDC149 | Coiled-coil Domain Containing 149                       | 7.10   | 3.16   | 0.31   | 0.02  | -2.18 | 1.06E-01 | -4.87 | 1.04E-04 | -2.72 | 1.60E-01 | M-1 |



|                     |              |                                                                        |        |        |        |        |       |          |       |          |       |          |     |
|---------------------|--------------|------------------------------------------------------------------------|--------|--------|--------|--------|-------|----------|-------|----------|-------|----------|-----|
| ENSMMUG00000015828  | RBPJ         | Recombination Signal Binding Protein For Immunoglobulin Kappa J Region | 19.68  | 30.33  | 14.44  | 16.43  | 0.41  | 5.14E-01 | -1.44 | 4.34E-03 | 1.08  | 1.35E-01 | M-1 |
| ENSMMUG00000038991  | LOC100430932 | Ubiquitin-conjugating Enzyme E2 D2-like                                | 10.69  | 12.95  | 5.80   | 5.95   | -0.03 | 9.79E-01 | -2.40 | 1.22E-03 | 1.34  | 2.50E-01 | M-1 |
| ENSMMUG00000006871  | ARAP2        | ArfGAP With RhoGAP Domain, Ankyrin Repeat And PH Domain 2              | 5.68   | 4.71   | 0.76   | 0.30   | -0.84 | 5.02E-01 | -4.23 | 1.96E-05 | -0.55 | 8.31E-01 | M-1 |
| ENSMMUG00000020324  | SMIM14       | Small Integral Membrane Protein 14                                     | 22.57  | 22.46  | 1.93   | 0.88   | -0.45 | 7.98E-01 | -5.04 | 2.42E-05 | 0.97  | 7.29E-01 | M-1 |
| ENSMMUG00000012563  | APBB2        | Amyloid Beta Precursor Protein Binding Family B Member 2               | 8.03   | 7.70   | 6.08   | 6.63   | -0.23 | 8.52E-01 | -1.75 | 4.27E-02 | 1.67  | 1.70E-01 | M-1 |
| ENSMMUG00000017733  | ATP8A1       | ATPase Phospholipid Transporting 8A1                                   | 11.01  | 7.26   | 2.69   | 0.57   | -0.54 | 7.05E-01 | -3.63 | 4.04E-04 | 0.72  | 7.71E-01 | M-1 |
| ENSMMUG00000015350  | HELQ         | Helicase, POLQ Like                                                    | 9.64   | 8.90   | 5.50   | 3.81   | -0.40 | 6.32E-01 | -1.58 | 1.47E-02 | 0.02  | 9.94E-01 | M-1 |
| ENSMMUG00000022312  | COPS4        | COP9 Signalosome Subunit 4                                             | 22.35  | 15.04  | 7.10   | 7.76   | -0.82 | 2.06E-01 | -1.22 | 4.03E-02 | -0.30 | 8.37E-01 | M-1 |
| ENSMMUG00000019859  | PRKG2        | Protein Kinase, CGMP-dependent, Type II                                | 1.89   | 0.30   | 0.10   | 0.01   | -2.09 | 1.77E-01 | -5.50 | 7.68E-04 | 0.11  | 9.86E-01 | M-1 |
| ENSMMUG00000021988  | NAA11        | N(alpha)-acetyltransferase 11, NatA Catalytic Subunit                  | 129.45 | 173.59 | 32.72  | 11.78  | 0.15  | 8.93E-01 | -2.35 | 9.80E-04 | -0.81 | 5.54E-01 | M-1 |
| ENSMMUG00000005958  |              |                                                                        | 18.24  | 14.25  | 3.23   | 2.15   | -0.46 | 6.16E-01 | -2.93 | 1.84E-05 | 0.01  | 9.99E-01 | M-1 |
| ENSMMUG00000000914  | CCNG2        | Cyclin G2                                                              | 14.74  | 7.87   | 8.26   | 3.76   | -0.96 | 2.51E-01 | -1.84 | 1.31E-02 | 0.81  | 5.64E-01 | M-1 |
| ENSMMUG00000019904  | CCNI         | Cyclin I                                                               | 199.25 | 187.12 | 45.68  | 49.14  | -0.60 | 4.75E-01 | -2.36 | 4.09E-04 | 0.63  | 6.58E-01 | M-1 |
| ENSMMUG000000039147 |              |                                                                        | 12.34  | 42.51  | 12.62  | 8.60   | 1.29  | 2.37E-01 | -2.29 | 1.89E-02 | 0.48  | 8.47E-01 | M-1 |
| ENSMMUG00000020910  | NUP54        | Nucleoporin 54                                                         | 91.97  | 52.67  | 21.55  | 20.15  | -0.93 | 2.79E-01 | -1.62 | 3.55E-02 | 0.57  | 7.32E-01 | M-1 |
| ENSMMUG00000020907  | ART3         | ADP-ribosyltransferase 3                                               | 1.80   | 0.57   | 0.02   | 0.05   | -3.33 | 1.00E-01 | -4.14 | 4.30E-02 | 2.33  | 5.47E-01 | M-1 |
| ENSMMUG00000002314  | AREG         | Amphiregulin                                                           | 0.43   | 5.24   | 0.03   | 0.01   | 1.39  | 5.45E-01 | -4.89 | 1.09E-02 | 0.13  | 9.86E-01 | M-1 |
| ENSMMUG00000017977  | ADAMTS3      | ADAM Metallopeptidase With Thrombospondin Type 1 Motif 3               | 7.70   | 2.66   | 0.62   | 0.75   | -1.41 | 2.26E-01 | -3.24 | 1.41E-03 | 1.02  | 6.19E-01 | M-1 |
| ENSMMUG00000003726  | PTPN13       | Protein Tyrosine Phosphatase, Non-receptor Type 13                     | 10.02  | 2.41   | 0.32   | 1.14   | -1.96 | 5.69E-02 | -3.60 | 1.36E-04 | 1.87  | 1.99E-01 | M-1 |
| ENSMMUG000000039241 |              |                                                                        | 5.82   | 9.36   | 2.85   | 1.39   | 0.00  | 9.98E-01 | -2.45 | 2.32E-03 | 0.16  | 9.58E-01 | M-1 |
| ENSMMUG00000014076  | AFF1         | AF4/FMR2 Family Member 1                                               | 157.70 | 127.73 | 37.65  | 20.44  | -0.57 | 4.12E-01 | -1.58 | 5.70E-03 | -0.95 | 2.93E-01 | M-1 |
| ENSMMUG00000010316  | HERC5        | HECT And RLD Domain Containing E3 Ubiquitin Protein Ligase 5           | 22.69  | 15.62  | 14.03  | 1.30   | -0.19 | 8.66E-01 | -2.21 | 2.66E-03 | -1.29 | 2.62E-01 | M-1 |
| ENSMMUG00000010141  | FAM13A       | Family With Sequence Similarity 13 Member A                            | 143.39 | 84.55  | 6.29   | 1.20   | -1.22 | 1.42E-01 | -4.75 | 1.53E-11 | -1.03 | 4.32E-01 | M-1 |
| ENSMMUG00000006309  | UNC5C        | Unc-5 Netrin Receptor C                                                | 6.67   | 1.07   | 0.12   | 0.05   | -2.65 | 8.73E-02 | -3.33 | 3.55E-02 | -2.81 | 2.54E-01 | M-1 |
| ENSMMUG00000013502  | STPG2        | Sperm Tail PG-rich Repeat Containing 2                                 | 7.88   | 8.13   | 1.07   | 0.09   | -0.09 | 9.60E-01 | -4.73 | 6.65E-05 | -1.75 | 4.45E-01 | M-1 |
| ENSMMUG00000011201  | UBE2D3       | Ubiquitin Conjugating Enzyme E2 D3                                     | 860.07 | #####  | 326.31 | 116.87 | 0.40  | 6.15E-01 | -2.70 | 2.82E-06 | -0.57 | 6.48E-01 | M-1 |
| ENSMMUG00000019083  | SLC9B2       | Solute Carrier Family 9 Member B2                                      | 2.03   | 0.59   | 0.30   | 0.10   | -1.81 | 1.29E-01 | -3.16 | 4.11E-03 | -1.22 | 5.67E-01 | M-1 |
| ENSMMUG00000019085  | BDH2         | 3-hydroxybutyrate Dehydrogenase 2                                      | 11.24  | 3.26   | 0.46   | 0.28   | -1.19 | 4.26E-01 | -4.20 | 7.13E-04 | -2.81 | 1.26E-01 | M-1 |
| ENSMMUG00000018811  | GSTCD        | Glutathione S-transferase C-terminal Domain Containing                 | 5.96   | 2.40   | 0.98   | 1.84   | -0.87 | 3.69E-01 | -1.70 | 4.50E-02 | 1.13  | 4.23E-01 | M-1 |
| ENSMMUG00000011722  | INTS12       | Integrator Complex Subunit 12                                          | 35.82  | 20.74  | 5.75   | 3.05   | -0.66 | 4.84E-01 | -2.32 | 2.26E-03 | -1.00 | 4.67E-01 | M-1 |
| ENSMMUG00000011660  | CXXC4        | CXXC Finger Protein 4                                                  | 1.51   | 2.85   | 0.35   | 0.08   | -1.18 | 4.18E-01 | -2.84 | 2.21E-02 | -0.48 | 8.94E-01 | M-1 |
| ENSMMUG00000019907  | PAPSS1       | 3'-phosphoadenosine 5'-phosphosulfate Synthase 1                       | 39.30  | 14.82  | 3.49   | 6.35   | -1.23 | 1.75E-01 | -3.32 | 1.92E-05 | 1.21  | 3.67E-01 | M-1 |
| ENSMMUG00000014077  |              |                                                                        | 4.92   | 5.92   | 4.59   | 1.10   | 0.16  | 8.94E-01 | -1.66 | 4.03E-02 | -0.64 | 7.08E-01 | M-1 |
| ENSMMUG00000044427  |              |                                                                        | 12.64  | 38.51  | 7.30   | 1.03   | 1.48  | 1.15E-01 | -3.46 | 3.12E-05 | -2.11 | 7.92E-02 | M-1 |
| ENSMMUG00000009819  | BBS7         | Bardet-Biedl Syndrome 7                                                | 5.92   | 4.97   | 1.43   | 2.65   | -0.16 | 9.22E-01 | -3.35 | 8.66E-04 | 2.22  | 1.30E-01 | M-1 |

|                     |           |                                                               |        |        |        |       |       |          |       |          |       |          |     |
|---------------------|-----------|---------------------------------------------------------------|--------|--------|--------|-------|-------|----------|-------|----------|-------|----------|-----|
| ENSMMUG00000004572  | ADAD1     | Adenosine Deaminase Domain Containing 1                       | 181.88 | 112.30 | 12.86  | 1.85  | -1.19 | 2.20E-01 | -3.54 | 1.55E-05 | -1.87 | 1.25E-01 | M-1 |
| ENSMMUG000000038364 |           |                                                               | 32.94  | 30.28  | 8.14   | 16.47 | -0.34 | 8.30E-01 | -2.71 | 1.30E-02 | 1.97  | 2.36E-01 | M-1 |
| ENSMMUG00000022355  | CLGN      | Calmegin                                                      | 1.97   | 1.20   | 1.54   | 0.43  | -0.78 | 7.00E-01 | -3.65 | 1.99E-02 | 1.98  | 4.63E-01 | M-1 |
| ENSMMUG00000010444  | RNF150    | Ring Finger Protein 150                                       | 1.10   | 0.85   | 0.04   | 0.02  | 0.50  | 8.72E-01 | -5.01 | 2.35E-02 | -0.17 | 9.84E-01 | M-1 |
| ENSMMUG00000003697  | INPP4B    | Inositol Polyphosphate-4-phosphatase Type II B                | 18.76  | 10.22  | 2.42   | 0.20  | -1.46 | 1.63E-01 | -3.76 | 4.33E-05 | -1.46 | 3.71E-01 | M-1 |
| ENSMMUG00000004432  | ANAPC10   | Anaphase Promoting Complex Subunit 10                         | 43.66  | 46.65  | 15.61  | 15.35 | 0.22  | 8.49E-01 | -1.69 | 3.35E-02 | -0.57 | 7.45E-01 | M-1 |
| ENSMMUG00000014953  | ARHGAP10  | Rho GTPase Activating Protein 10                              | 30.18  | 16.40  | 3.85   | 5.98  | -0.40 | 7.30E-01 | -2.80 | 7.71E-04 | 0.75  | 6.79E-01 | M-1 |
| ENSMMUG00000014955  | NR3C2     | Nuclear Receptor Subfamily 3 Group C Member 2                 | 34.30  | 42.06  | 13.14  | 1.50  | -0.26 | 8.54E-01 | -4.40 | 1.19E-06 | -0.66 | 7.68E-01 | M-1 |
| ENSMMUG00000041800  | FAM160A1  | Family With Sequence Similarity 160 Member A1                 | 33.96  | 33.07  | 3.84   | 0.39  | 0.11  | 9.39E-01 | -5.54 | 1.46E-10 | -0.34 | 8.98E-01 | M-1 |
| ENSMMUG00000014024  | DCHS2     | Dachsous Cadherin-related 2                                   | 2.36   | 2.25   | 0.20   | 0.03  | -0.49 | 7.40E-01 | -5.52 | 2.41E-07 | -0.80 | 7.61E-01 | M-1 |
| ENSMMUG00000021147  | RBM46     | RNA Binding Motif Protein 46                                  | 42.25  | 24.30  | 7.76   | 5.27  | -0.70 | 3.38E-01 | -2.12 | 4.42E-04 | -0.07 | 9.76E-01 | M-1 |
| ENSMMUG00000004647  | RXFP1     | Relaxin/insulin Like Family Peptide Receptor 1                | 0.10   | 0.92   | 0.27   | 0.05  | 3.92  | 6.61E-02 | -6.84 | 1.10E-03 | -0.69 | 9.09E-01 | M-1 |
| ENSMMUG00000030046  | FNIP2     | Folliculin Interacting Protein 2                              | 2.34   | 1.26   | 0.15   | 1.46  | -0.73 | 6.99E-01 | -4.76 | 9.06E-04 | 2.93  | 1.79E-01 | M-1 |
| ENSMMUG00000041688  | MARCH1    | Membrane Associated Ring-CH-type Finger 1                     | 1.46   | 1.29   | 0.65   | 0.44  | -1.21 | 3.94E-01 | -3.00 | 1.51E-02 | 1.72  | 4.23E-01 | M-1 |
| ENSMMUG000000039808 |           |                                                               | 0.91   | 3.34   | 0.63   | 0.62  | 2.55  | 2.23E-01 | -4.12 | 3.52E-02 | -0.09 | 9.91E-01 | M-1 |
| ENSMMUG000000039189 |           |                                                               | 3.27   | 22.70  | 1.86   | 1.12  | 1.72  | 6.41E-02 | -2.90 | 6.88E-04 | 0.33  | 8.98E-01 | M-1 |
| ENSMMUG00000040113  | MFAP3L    | Microfibril Associated Protein 3 Like                         | 5.19   | 3.74   | 0.85   | 0.72  | -0.46 | 7.95E-01 | -4.23 | 4.10E-04 | 1.88  | 3.53E-01 | M-1 |
| ENSMMUG00000012175  | PRIMPOL   | Primase And DNA Directed Polymerase                           | 6.03   | 3.94   | 1.23   | 1.65  | -0.21 | 9.18E-01 | -2.62 | 4.80E-02 | 0.85  | 7.78E-01 | M-1 |
| ENSMMUG00000012177  | ACSL1     | Acyl-CoA Synthetase Long Chain Family Member 1                | 3.75   | 1.98   | 0.59   | 0.09  | -1.33 | 2.38E-01 | -2.67 | 8.43E-03 | -1.26 | 5.12E-01 | M-1 |
| ENSMMUG00000003518  | SNX25     | Sorting Nexin 25                                              | 31.73  | 17.17  | 5.16   | 1.23  | -0.84 | 4.84E-01 | -2.95 | 2.32E-03 | -1.29 | 4.55E-01 | M-1 |
| ENSMMUG00000015407  | PDLIM3    | PDZ And LIM Domain 3                                          | 1.27   | 0.44   | 0.03   | 0.05  | -1.05 | 5.67E-01 | -6.48 | 2.57E-05 | 1.83  | 5.40E-01 | M-1 |
| ENSMMUG00000015733  | SORBS2    | Sorbin And SH3 Domain Containing 2                            | 1.96   | 2.95   | 0.18   | 2.54  | 0.30  | 8.64E-01 | -3.69 | 1.58E-03 | 3.03  | 5.45E-02 | M-1 |
| ENSMMUG00000015803  | PRMT2     | Protein Arginine Methyltransferase 2                          | 9.37   | 5.71   | 0.27   | 0.50  | -1.88 | 1.27E-01 | -3.72 | 9.94E-04 | -0.48 | 8.81E-01 | M-1 |
| ENSMMUG00000038468  |           |                                                               | 2.70   | 7.86   | 0.86   | 1.24  | 2.26  | 2.44E-01 | -8.01 | 9.76E-06 | 4.58  | 6.96E-02 | M-1 |
| ENSMMUG00000009288  | PKNOX1    | PBX/knotted 1 Homeobox 1                                      | 34.68  | 100.73 | 19.28  | 14.70 | 0.63  | 6.76E-01 | -3.33 | 2.71E-03 | 0.79  | 7.63E-01 | M-1 |
| ENSMMUG00000018085  | SLC37A1   | Solute Carrier Family 37 Member 1                             | 12.50  | 7.06   | 0.43   | 0.38  | -1.57 | 1.82E-01 | -4.27 | 2.66E-05 | -0.04 | 9.93E-01 | M-1 |
| ENSMMUG00000018084  | RSPH1     | Radial Spoke Head 1 Homolog                                   | 0.43   | 2.54   | 0.13   | 0.32  | 1.26  | 6.47E-01 | -6.07 | 5.15E-03 | 3.70  | 2.69E-01 | M-1 |
| ENSMMUG00000018081  | UBASH3A   | Ubiquitin Associated And SH3 Domain Containing A              | 2.29   | 0.59   | 0.01   | 0.02  | -2.11 | 2.38E-01 | -7.99 | 2.95E-06 | 1.30  | 7.52E-01 | M-1 |
| ENSMMUG00000018046  | LOC722502 | PR Domain Zinc Finger Protein 15-like                         | 4.47   | 7.63   | 0.66   | 1.42  | -0.73 | 6.42E-01 | -2.53 | 4.73E-02 | -0.11 | 9.81E-01 | M-1 |
| ENSMMUG00000015329  | MX1       | MX Dynamin Like GTPase 1                                      | 0.45   | 0.93   | 0.41   | 1.94  | -0.46 | 8.50E-01 | -4.70 | 5.50E-03 | 4.21  | 5.70E-02 | M-1 |
| ENSMMUG00000030481  |           |                                                               | 20.21  | 13.50  | 0.35   | 0.08  | -0.22 | 9.27E-01 | -9.11 | 4.22E-08 | 0.27  | 9.68E-01 | M-1 |
| ENSMMUG00000005174  | DSCAM     | DS Cell Adhesion Molecule                                     | 1.35   | 1.17   | 0.05   | 0.01  | -0.10 | 9.58E-01 | -5.50 | 7.76E-06 | -1.15 | 6.85E-01 | M-1 |
| ENSMMUG00000008498  | PSMG1     | Proteasome Assembly Chaperone 1                               | 198.76 | 239.23 | 138.21 | 84.60 | 0.56  | 3.61E-01 | -1.28 | 1.46E-02 | -0.46 | 6.71E-01 | M-1 |
| ENSMMUG00000016789  | KCNJ15    | Potassium Voltage-gated Channel Subfamily J Member 15         | 0.84   | 0.44   | 0.35   | 0.04  | -2.29 | 2.43E-01 | -4.74 | 1.27E-02 | 2.23  | 5.08E-01 | M-1 |
| ENSMMUG00000018136  | KCNJ6     | Potassium Voltage-gated Channel Subfamily J Member 6          | 8.49   | 8.15   | 0.39   | 0.08  | -0.15 | 9.33E-01 | -4.62 | 2.65E-05 | -1.77 | 4.01E-01 | M-1 |
| ENSMMUG00000018131  | DYRK1A    | Dual Specificity Tyrosine Phosphorylation Regulated Kinase 1A | 60.98  | 36.69  | 20.01  | 16.97 | -0.70 | 2.56E-01 | -1.14 | 4.08E-02 | 0.31  | 8.12E-01 | M-1 |

|                     |           |                                                                                |        |        |       |       |       |          |       |          |       |          |     |
|---------------------|-----------|--------------------------------------------------------------------------------|--------|--------|-------|-------|-------|----------|-------|----------|-------|----------|-----|
| ENSMMUG00000005508  | IFNGR2    | Interferon Gamma Receptor 2                                                    | 13.28  | 5.29   | 1.47  | 1.28  | -1.42 | 3.08E-01 | -2.55 | 4.31E-02 | -0.63 | 8.39E-01 | M-1 |
| ENSMMUG00000019571  | TIAM1     | T-cell Lymphoma Invasion And Metastasis 1                                      | 192.73 | 95.08  | 18.64 | 6.53  | -1.57 | 8.76E-02 | -4.24 | 1.47E-07 | 0.90  | 5.90E-01 | M-1 |
| ENSMMUG00000011095  | BACH1     | BTB Domain And CNC Homolog 1                                                   | 38.88  | 20.95  | 5.98  | 4.42  | -0.92 | 3.07E-01 | -3.21 | 1.49E-05 | 0.56  | 7.51E-01 | M-1 |
| ENSMMUG00000004300  | NCAM2     | Neural Cell Adhesion Molecule 2                                                | 38.70  | 13.20  | 2.76  | 2.31  | -1.49 | 9.45E-02 | -3.25 | 4.57E-05 | 0.87  | 5.97E-01 | M-1 |
| ENSMMUG00000002282  | SYCP3     | Synaptonemal Complex Protein 3                                                 | 6.90   | 48.29  | 12.43 | 3.71  | 2.05  | 8.98E-02 | -2.75 | 1.55E-02 | -0.61 | 8.30E-01 | M-1 |
| ENSMMUG00000023770  | NRIP1     | Nuclear Receptor Interacting Protein 1                                         | 1.53   | 1.07   | 0.23  | 0.57  | 0.10  | 9.45E-01 | -2.46 | 7.00E-03 | 1.66  | 2.36E-01 | M-1 |
| ENSMMUG00000020089  | RBM11     | RNA Binding Motif Protein 11                                                   | 23.45  | 6.14   | 0.59  | 0.09  | -2.16 | 9.74E-02 | -3.45 | 4.57E-03 | -2.02 | 3.23E-01 | M-1 |
| ENSMMUG00000003283  | ELFN1     | Extracellular Leucine Rich Repeat And Fibronectin Type III Domain Containing 1 | 1.95   | 3.21   | 0.03  | 0.05  | 0.95  | 5.76E-01 | -8.31 | 4.01E-09 | 2.11  | 4.14E-01 | M-1 |
| ENSMMUG00000011659  | MAD1L1    | Mitotic Arrest Deficient 1 Like 1                                              | 7.43   | 7.86   | 2.07  | 1.92  | 0.29  | 8.55E-01 | -3.05 | 2.95E-03 | -0.03 | 9.95E-01 | M-1 |
| ENSMMUG00000005052  | FBXL18    | F-box And Leucine Rich Repeat Protein 18                                       | 3.02   | 8.20   | 1.72  | 1.91  | 0.97  | 4.50E-01 | -2.59 | 1.56E-02 | 0.40  | 8.95E-01 | M-1 |
| ENSMMUG00000008219  | SLC29A4   | Solute Carrier Family 29 Member 4                                              | 23.32  | 14.04  | 0.31  | 0.30  | -0.81 | 4.96E-01 | -5.32 | 1.68E-08 | 0.22  | 9.52E-01 | M-1 |
| ENSMMUG000000030415 | KDEL2     | KDEL Endoplasmic Reticulum Protein Retention Receptor 2                        | 71.64  | 89.09  | 52.33 | 33.81 | 0.40  | 6.20E-01 | -1.37 | 3.19E-02 | -0.24 | 8.95E-01 | M-1 |
| ENSMMUG00000017570  | DTX2      | Deltex E3 Ubiquitin Ligase 2                                                   | 233.69 | 179.98 | 10.83 | 3.16  | -0.50 | 5.63E-01 | -4.00 | 4.34E-10 | -1.53 | 1.10E-01 | M-1 |
| ENSMMUG00000004124  | HSPB1     | Heat Shock Protein Family B (small) Member 1                                   | 28.00  | 28.69  | 2.76  | 3.32  | 0.20  | 8.92E-01 | -4.57 | 4.33E-07 | 1.06  | 5.54E-01 | M-1 |
| ENSMMUG00000022772  | POM121C   | POM121 Transmembrane Nucleoporin C                                             | 44.51  | 87.15  | 39.63 | 13.36 | 0.86  | 2.21E-01 | -1.79 | 3.51E-03 | -0.76 | 5.00E-01 | M-1 |
| ENSMMUG00000007681  | FKBP6     | FK506 Binding Protein 6                                                        | 16.99  | 12.46  | 2.23  | 1.18  | -1.71 | 1.03E-01 | -2.28 | 2.07E-02 | -1.00 | 5.99E-01 | M-1 |
| ENSMMUG00000009093  | TBL2      | Transducin Beta Like 2                                                         | 3.72   | 18.92  | 4.63  | 4.92  | 0.55  | 6.44E-01 | -1.89 | 4.44E-02 | 2.08  | 9.93E-02 | M-1 |
| ENSMMUG00000003128  | LIMK1     | LIM Domain Kinase 1                                                            | 11.72  | 17.00  | 4.98  | 3.02  | 0.59  | 6.89E-01 | -2.88 | 8.43E-03 | -0.42 | 8.93E-01 | M-1 |
| ENSMMUG00000002502  |           |                                                                                | 16.51  | 25.69  | 7.06  | 16.85 | 0.36  | 7.57E-01 | -1.95 | 2.13E-02 | 0.40  | 8.53E-01 | M-1 |
| ENSMMUG000000041473 | LOC695887 | Rab5 GDP/GTP Exchange Factor                                                   | 26.53  | 37.96  | 6.47  | 4.31  | 0.52  | 6.41E-01 | -2.28 | 7.22E-03 | -0.66 | 7.26E-01 | M-1 |
| ENSMMUG000000048379 |           |                                                                                | 312.28 | 288.16 | 54.11 | 2.99  | -0.11 | 9.33E-01 | -4.01 | 3.62E-07 | -1.85 | 1.17E-01 | M-1 |
| ENSMMUG000000013764 | IGFBP3    | Insulin Like Growth Factor Binding Protein 3                                   | 4.64   | 1.69   | 0.61  | 0.11  | -0.84 | 6.01E-01 | -5.36 | 3.29E-05 | 1.19  | 6.68E-01 | M-1 |
| ENSMMUG00000002421  | POLM      | DNA Polymerase Mu                                                              | 3.51   | 2.16   | 0.19  | 0.45  | -0.43 | 8.57E-01 | -4.67 | 3.74E-03 | 2.63  | 3.30E-01 | M-1 |
| ENSMMUG000000021089 | SFRP4     | Secreted Frizzled Related Protein 4                                            | 6.77   | 9.57   | 0.31  | 0.03  | 0.27  | 9.18E-01 | -7.32 | 1.68E-05 | -0.53 | 9.22E-01 | M-1 |
| ENSMMUG000000023104 | ELMO1     | Engulfment And Cell Motility 1                                                 | 24.93  | 50.08  | 2.07  | 1.13  | 0.89  | 4.43E-01 | -5.73 | 1.63E-10 | 1.29  | 4.44E-01 | M-1 |
| ENSMMUG000000021186 | ANLN      | Anillin Actin Binding Protein                                                  | 98.76  | 71.55  | 29.68 | 48.57 | -0.37 | 6.81E-01 | -1.39 | 4.43E-02 | 0.67  | 6.09E-01 | M-1 |
| ENSMMUG00000001350  | HERPUD2   | HERPUD Family Member 2                                                         | 15.01  | 12.79  | 1.61  | 2.29  | -0.91 | 4.46E-01 | -3.02 | 1.85E-03 | 1.88  | 2.00E-01 | M-1 |
| ENSMMUG00000002886  | BBS9      | Bardet-Biedl Syndrome 9                                                        | 37.77  | 46.27  | 4.96  | 4.89  | -0.10 | 9.48E-01 | -3.64 | 4.92E-05 | -1.02 | 5.67E-01 | M-1 |
| ENSMMUG00000011694  | FKBP9     | FK506 Binding Protein 9                                                        | 9.05   | 7.62   | 1.00  | 4.00  | -0.24 | 8.80E-01 | -3.75 | 1.67E-04 | 2.53  | 6.89E-02 | M-1 |
| ENSMMUG00000008329  | CHN2      | Chimerin 2                                                                     | 137.73 | 60.10  | 18.21 | 1.09  | -1.36 | 2.53E-01 | -4.69 | 2.32E-06 | -2.02 | 1.97E-01 | M-1 |
| ENSMMUG000000039317 | CREB5     | CAMP Responsive Element Binding Protein 5                                      | 24.45  | 30.14  | 10.17 | 0.47  | -0.39 | 8.33E-01 | -3.52 | 5.45E-03 | -2.48 | 1.94E-01 | M-1 |
| ENSMMUG000000018544 | SKAP2     | Src Kinase Associated Phosphoprotein 2                                         | 18.95  | 12.42  | 2.65  | 4.22  | -0.61 | 6.36E-01 | -2.89 | 3.20E-03 | 1.26  | 4.77E-01 | M-1 |
| ENSMMUG000000016939 | OSBPL3    | Oxysterol Binding Protein Like 3                                               | 10.70  | 5.77   | 2.15  | 2.44  | -0.82 | 3.67E-01 | -2.64 | 4.41E-04 | 1.37  | 2.48E-01 | M-1 |
| ENSMMUG000000001562 | KLHL7     | Kelch Like Family Member 7                                                     | 16.64  | 13.68  | 4.28  | 2.39  | -0.17 | 9.05E-01 | -2.11 | 2.40E-02 | -0.81 | 6.78E-01 | M-1 |
| ENSMMUG000000022766 | CDCA7L    | Cell Division Cycle Associated 7 Like                                          | 18.54  | 11.91  | 7.30  | 3.94  | -0.87 | 2.81E-01 | -2.26 | 9.65E-04 | 0.33  | 8.57E-01 | M-1 |
| ENSMMUG000000022764 | DNAH11    | Dynein Axonemal Heavy Chain 11                                                 | 8.64   | 5.91   | 1.04  | 0.40  | -0.47 | 6.68E-01 | -2.98 | 2.08E-04 | -1.11 | 4.47E-01 | M-1 |

|                    |           |                                                                            |        |        |       |       |       |          |       |          |       |          |     |
|--------------------|-----------|----------------------------------------------------------------------------|--------|--------|-------|-------|-------|----------|-------|----------|-------|----------|-----|
| ENSMMUG00000022683 | MACC1     | MACC1, MET<br>Transcriptional Regulator                                    | 14.57  | 3.46   | 3.23  | 0.07  | -1.89 | 1.64E-01 | -5.26 | 1.92E-05 | 0.11  | 9.82E-01 | M-1 |
| ENSMMUG00000009609 | TWISTNB   | TWIST Neighbor                                                             | 6.44   | 8.49   | 3.61  | 2.78  | -0.12 | 9.03E-01 | -1.37 | 3.41E-02 | 0.75  | 5.16E-01 | M-1 |
| ENSMMUG00000011170 | LOC708314 | Histone Deacetylase 9                                                      | 2.48   | 1.45   | 0.32  | 0.07  | -1.18 | 4.47E-01 | -2.68 | 4.82E-02 | -1.00 | 7.39E-01 | M-1 |
| ENSMMUG00000012694 | THSD7A    | Thrombospondin Type 1<br>Domain Containing 7A                              | 25.41  | 12.90  | 1.00  | 0.18  | -1.73 | 6.81E-02 | -3.56 | 3.76E-05 | -2.24 | 6.96E-02 | M-1 |
| ENSMMUG00000043160 |           |                                                                            | 52.77  | 54.58  | 22.78 | 13.24 | 0.18  | 8.54E-01 | -2.01 | 1.78E-03 | -0.29 | 8.67E-01 | M-1 |
| ENSMMUG00000023657 | CLDN12    | Claudin 12                                                                 | 29.45  | 18.50  | 12.61 | 4.44  | -0.93 | 2.28E-01 | -1.51 | 2.90E-02 | 0.21  | 9.17E-01 | M-1 |
| ENSMMUG00000015685 | ZNF804B   | Zinc Finger Protein 804B                                                   | 3.09   | 2.90   | 0.19  | 0.04  | -1.30 | 3.49E-01 | -3.48 | 3.49E-03 | -2.12 | 2.62E-01 | M-1 |
| ENSMMUG00000000480 | KIAA1324L | KIAA1324 Like                                                              | 8.79   | 4.82   | 1.35  | 0.75  | -1.06 | 3.40E-01 | -3.76 | 3.74E-05 | 1.58  | 2.97E-01 | M-1 |
| ENSMMUG00000042831 |           |                                                                            | 60.50  | 29.99  | 6.23  | 0.41  | -1.36 | 4.34E-01 | -4.00 | 6.47E-03 | -1.30 | 6.92E-01 | M-1 |
| ENSMMUG00000030244 | CACNA2D1  | Calcium Voltage-gated<br>Channel Auxiliary Subunit<br>Alpha2delta 1        | 15.21  | 6.55   | 1.59  | 0.19  | -1.92 | 6.05E-02 | -2.99 | 1.96E-03 | -2.02 | 1.66E-01 | M-1 |
| ENSMMUG00000001801 | MAGI2     | Membrane Associated<br>Guanylate Kinase, WW And<br>PDZ Domain Containing 2 | 3.47   | 2.55   | 0.16  | 0.05  | -0.22 | 9.01E-01 | -4.64 | 3.88E-05 | -1.66 | 4.29E-01 | M-1 |
| ENSMMUG00000006701 | GSAP      | Gamma-secretase Activating<br>Protein                                      | 0.57   | 0.69   | 0.21  | 0.08  | 0.67  | 7.34E-01 | -4.25 | 4.43E-03 | -0.04 | 9.95E-01 | M-1 |
| ENSMMUG00000006696 | CCDC146   | Coiled-coil Domain<br>Containing 146                                       | 89.67  | 87.89  | 13.24 | 1.19  | -0.15 | 9.16E-01 | -3.72 | 8.88E-06 | -1.54 | 2.58E-01 | M-1 |
| ENSMMUG00000041743 |           |                                                                            | 1.26   | 0.46   | 0.01  | 0.04  | -1.97 | 3.67E-01 | -5.32 | 9.65E-03 | 1.67  | 7.07E-01 | M-1 |
| ENSMMUG00000013276 | BAIAP2L1  | BAI1 Associated Protein 2<br>Like 1                                        | 165.06 | 152.27 | 30.01 | 14.42 | -0.29 | 8.02E-01 | -2.95 | 1.61E-04 | -0.49 | 8.04E-01 | M-1 |
| ENSMMUG00000009183 | SMURF1    | SMAD Specific E3 Ubiquitin<br>Protein Ligase 1                             | 7.99   | 21.03  | 4.83  | 3.36  | 0.60  | 6.95E-01 | -3.19 | 4.59E-03 | 1.23  | 5.70E-01 | M-1 |
| ENSMMUG00000019445 | KPNA7     | Karyopherin Subunit Alpha<br>7                                             | 486.74 | 201.76 | 29.29 | 2.71  | -1.49 | 9.90E-02 | -4.04 | 2.98E-07 | -1.64 | 1.86E-01 | M-1 |
| ENSMMUG00000020140 | ZNF394    | Zinc Finger Protein 394                                                    | 47.35  | 59.16  | 15.78 | 6.41  | 0.39  | 7.01E-01 | -2.61 | 3.33E-04 | -0.87 | 5.30E-01 | M-1 |
| ENSMMUG0000004021  | ZNF3      | Zinc Finger Protein 3                                                      | 7.33   | 6.55   | 2.66  | 1.73  | 0.34  | 7.68E-01 | -1.84 | 2.95E-02 | -0.49 | 8.10E-01 | M-1 |
| ENSMMUG00000013450 | TAF6      | TATA-box Binding Protein<br>Associated Factor 6                            | 8.59   | 9.20   | 2.00  | 3.96  | 0.04  | 9.73E-01 | -1.99 | 7.53E-03 | 1.08  | 3.93E-01 | M-1 |
| ENSMMUG00000018405 | STAG3     | Stromal Antigen 3                                                          | 8.82   | 4.75   | 0.63  | 0.27  | -1.08 | 3.23E-01 | -4.20 | 3.36E-06 | -0.46 | 8.53E-01 | M-1 |
| ENSMMUG00000012720 | ZCWPW1    | Zinc Finger CW-type And<br>PWWP Domain Containing<br>1                     | 27.60  | 48.63  | 1.85  | 0.30  | 0.11  | 9.50E-01 | -4.96 | 3.77E-06 | -1.24 | 5.66E-01 | M-1 |
| ENSMMUG00000015311 | LRCH4     | Leucine Rich Repeats And<br>Calponin Homology<br>Domain Containing 4       | 23.73  | 19.24  | 7.96  | 5.16  | 0.07  | 9.63E-01 | -2.52 | 7.51E-03 | 0.15  | 9.66E-01 | M-1 |
| ENSMMUG00000048774 |           |                                                                            | 0.86   | 2.06   | 0.03  | 0.04  | 0.25  | 9.19E-01 | -8.14 | 1.49E-07 | 2.61  | 3.24E-01 | M-1 |
| ENSMMUG00000030384 | LOC719871 | Ras GTPase-activating<br>Protein 4                                         | 2.85   | 1.46   | 0.10  | 0.10  | -0.85 | 6.68E-01 | -4.23 | 5.60E-03 | 0.07  | 9.92E-01 | M-1 |
| ENSMMUG00000012435 | ARMC10    | Armadillo Repeat<br>Containing 10                                          | 5.82   | 10.59  | 2.56  | 6.83  | 1.30  | 4.03E-01 | -3.26 | 1.29E-02 | 2.13  | 3.02E-01 | M-1 |
| ENSMMUG00000048420 | RELN      | Reelin                                                                     | 1.74   | 0.66   | 0.16  | 0.08  | -1.44 | 3.66E-01 | -3.36 | 1.49E-02 | -0.94 | 7.68E-01 | M-1 |
| ENSMMUG00000047333 |           |                                                                            | 1.93   | 6.34   | 0.36  | 0.43  | 0.76  | 7.68E-01 | -4.09 | 3.20E-02 | 2.18  | 5.28E-01 | M-1 |
| ENSMMUG00000014122 | CAV1      | Caveolin 1                                                                 | 4.77   | 5.42   | 0.57  | 0.02  | 0.30  | 9.07E-01 | -5.64 | 1.85E-03 | -2.21 | 5.36E-01 | M-1 |
| ENSMMUG00000021722 | ST7       | Suppression Of<br>Tumorigenicity 7                                         | 6.04   | 5.04   | 1.15  | 1.14  | 0.21  | 9.03E-01 | -2.58 | 2.37E-02 | 0.82  | 7.46E-01 | M-1 |
| ENSMMUG00000010297 | CTTNBP2   | Cortactin Binding Protein 2                                                | 4.44   | 1.95   | 0.18  | 0.45  | -1.23 | 4.04E-01 | -5.60 | 3.06E-06 | 2.35  | 2.09E-01 | M-1 |
| ENSMMUG00000002434 | ING3      | Inhibitor Of Growth Family<br>Member 3                                     | 33.68  | 26.59  | 12.66 | 7.42  | -0.07 | 9.56E-01 | -2.01 | 1.30E-02 | -0.40 | 8.51E-01 | M-1 |
| ENSMMUG00000011536 | IQUB      | IQ Motif And Ubiquitin<br>Domain Containing                                | 14.53  | 8.63   | 2.35  | 1.22  | -0.62 | 5.57E-01 | -2.70 | 9.32E-04 | -0.12 | 9.69E-01 | M-1 |
| ENSMMUG00000011544 | WASL      | Wiskott-Aldrich Syndrome<br>Like                                           | 28.73  | 25.84  | 9.00  | 19.97 | -0.40 | 6.66E-01 | -1.49 | 3.70E-02 | 0.84  | 5.09E-01 | M-1 |
| ENSMMUG00000017542 | UBE2H     | Ubiquitin Conjugating<br>Enzyme E2 H                                       | 26.78  | 7.63   | 1.36  | 2.53  | -2.07 | 9.36E-02 | -2.44 | 4.17E-02 | 1.09  | 6.47E-01 | M-1 |
| ENSMMUG00000006155 | ZC3HC1    | Zinc Finger C3HC-type<br>Containing 1                                      | 5.49   | 13.67  | 4.08  | 2.47  | 1.53  | 2.30E-01 | -2.86 | 1.18E-02 | -0.21 | 9.60E-01 | M-1 |
| ENSMMUG00000009495 | CPA1      | Carboxypeptidase A1                                                        | 6.64   | 6.03   | 0.22  | 0.03  | -1.67 | 3.35E-01 | -5.19 | 6.04E-04 | -0.47 | 9.32E-01 | M-1 |
| ENSMMUG00000005127 | PLXNA4    | Plexin A4                                                                  | 18.78  | 9.28   | 0.45  | 0.09  | -1.61 | 1.02E-01 | -4.83 | 2.08E-08 | -1.77 | 2.02E-01 | M-1 |
| ENSMMUG00000002317 | WDR91     | WD Repeat Domain 91                                                        | 7.27   | 5.86   | 1.00  | 0.63  | -0.34 | 8.38E-01 | -3.81 | 6.64E-04 | -0.49 | 8.77E-01 | M-1 |

|                    |          |                                                      |        |        |       |       |       |          |        |          |       |          |     |
|--------------------|----------|------------------------------------------------------|--------|--------|-------|-------|-------|----------|--------|----------|-------|----------|-----|
| ENSMMUG00000016181 | CNOT4    | CCR4-NOT Transcription Complex Subunit 4             | 50.36  | 92.02  | 26.10 | 11.22 | 0.72  | 2.39E-01 | -2.11  | 4.23E-05 | -1.05 | 1.86E-01 | M-1 |
| ENSMMUG00000016386 | SLC13A4  | Solute Carrier Family 13 Member 4                    | 3.18   | 8.09   | 0.38  | 0.30  | 1.18  | 3.92E-01 | -3.64  | 1.61E-03 | -2.06 | 2.65E-01 | M-1 |
| ENSMMUG00000016831 | DGKI     | Diacylglycerol Kinase Iota                           | 7.18   | 6.03   | 0.74  | 0.10  | 0.00  | 9.99E-01 | -5.00  | 1.03E-04 | -1.21 | 6.81E-01 | M-1 |
| ENSMMUG00000002481 | HIPK2    | Homeodomain Interacting Protein Kinase 2             | 9.45   | 13.91  | 5.24  | 2.06  | 0.07  | 9.69E-01 | -2.22  | 4.28E-02 | -1.14 | 5.73E-01 | M-1 |
| ENSMMUG00000004224 | PARP12   | Poly(ADP-ribose) Polymerase Family Member 12         | 91.04  | 46.98  | 6.10  | 4.79  | -1.17 | 1.90E-01 | -3.02  | 8.75E-05 | -0.49 | 8.00E-01 | M-1 |
| ENSMMUG00000042299 | DENND2A  | DENN Domain Containing 2A                            | 1.78   | 0.91   | 0.15  | 0.15  | -2.03 | 1.53E-01 | -3.61  | 7.21E-03 | 0.69  | 8.43E-01 | M-1 |
| ENSMMUG00000038297 |          |                                                      | 8.00   | 2.96   | 0.28  | 0.90  | -1.84 | 5.05E-01 | -6.57  | 5.09E-03 | 4.67  | 1.79E-01 | M-1 |
| ENSMMUG00000044167 | WEE2     | WEE1 Homolog 2                                       | 631.45 | 262.90 | 35.48 | 3.49  | -1.51 | 1.37E-01 | -3.38  | 1.49E-04 | -2.13 | 9.49E-02 | M-1 |
| ENSMMUG00000016273 |          |                                                      | 0.80   | 1.14   | 0.11  | 0.17  | -0.67 | 6.32E-01 | -3.14  | 4.42E-03 | 0.24  | 9.50E-01 | M-1 |
| ENSMMUG00000045624 |          |                                                      | 15.50  | 14.93  | 1.79  | 0.04  | -0.97 | 5.63E-01 | -4.38  | 1.64E-03 | -3.51 | 1.14E-01 | M-1 |
| ENSMMUG00000048104 | PRSS2    | Protease, Serine, 2 (trypsin 2)                      | 18.10  | 8.28   | 5.65  | 0.06  | -1.84 | 2.08E-01 | -5.02  | 1.74E-04 | -2.82 | 2.12E-01 | M-1 |
| ENSMMUG00000017541 | CUL1     | Cullin 1                                             | 117.30 | 99.51  | 34.94 | 35.47 | -0.12 | 8.94E-01 | -1.71  | 2.64E-03 | -0.08 | 9.70E-01 | M-1 |
| ENSMMUG00000015772 | CNTNAP2  | Contactin Associated Protein Like 2                  | 1.50   | 0.56   | 0.27  | 0.08  | -0.35 | 8.74E-01 | -6.66  | 2.44E-05 | 1.63  | 6.06E-01 | M-1 |
| ENSMMUG00000008650 | TPK1     | Thiamin Pyrophosphokinase 1                          | 24.01  | 21.85  | 15.10 | 8.75  | -0.35 | 7.87E-01 | -2.50  | 5.40E-03 | 1.14  | 4.83E-01 | M-1 |
| ENSMMUG00000020609 |          |                                                      | 18.04  | 7.27   | 0.22  | 0.11  | -1.47 | 1.57E-01 | -4.67  | 5.79E-07 | -1.44 | 4.31E-01 | M-1 |
| ENSMMUG00000005233 | LRRC61   | Leucine Rich Repeat Containing 61                    | 0.41   | 1.30   | 1.18  | 0.47  | 1.45  | 4.78E-01 | -4.82  | 5.04E-03 | 3.38  | 1.71E-01 | M-1 |
| ENSMMUG00000043445 | GBX1     | Gastrulation Brain Homeobox 1                        | 8.54   | 4.33   | 0.08  | 0.06  | -1.59 | 3.29E-01 | -8.05  | 9.96E-08 | 0.64  | 8.77E-01 | M-1 |
| ENSMMUG00000017721 | GALNTL5  | Polypeptide N-acetylgalactosaminyltransferase Like 5 | 1.19   | 0.94   | 0.10  | 0.15  | 0.61  | 7.05E-01 | -5.95  | 1.86E-06 | 3.10  | 9.49E-02 | M-1 |
| ENSMMUG00000006328 | DPP6     | Dipeptidyl Peptidase Like 6                          | 4.05   | 1.77   | 0.07  | 0.06  | -0.93 | 4.44E-01 | -4.75  | 1.62E-06 | 0.06  | 9.88E-01 | M-1 |
| ENSMMUG00000007351 | RBM33    | RNA Binding Motif Protein 33                         | 66.71  | 49.63  | 22.85 | 12.26 | -0.38 | 5.78E-01 | -1.43  | 7.08E-03 | -1.03 | 1.90E-01 | M-1 |
| ENSMMUG00000045442 |          |                                                      | 12.09  | 14.10  | 2.16  | 0.27  | 0.58  | 7.76E-01 | -7.31  | 6.67E-06 | 0.81  | 8.60E-01 | M-1 |
| ENSMMUG00000022806 |          |                                                      | 1.57   | 2.33   | 0.08  | 0.12  | 0.06  | 9.84E-01 | -7.19  | 5.34E-05 | 4.70  | 5.59E-02 | M-1 |
| ENSMMUG00000006973 | WDR60    | WD Repeat Domain 60                                  | 16.54  | 10.98  | 2.37  | 2.05  | -0.90 | 3.02E-01 | -2.49  | 7.29E-04 | 0.11  | 9.68E-01 | M-1 |
| ENSMMUG00000019439 |          |                                                      | 3.79   | 1.37   | 0.18  | 0.23  | -0.45 | 8.36E-01 | -3.74  | 1.78E-02 | 0.71  | 8.73E-01 | M-1 |
| ENSMMUG00000013189 |          |                                                      | 180.42 | 98.02  | 17.60 | 9.83  | -1.13 | 1.87E-01 | -3.14  | 1.86E-05 | 0.11  | 9.69E-01 | M-1 |
| ENSMMUG00000018742 | ADCY2    | Adenylate Cyclase 2                                  | 1.76   | 0.80   | 0.03  | 0.17  | -2.08 | 1.07E-01 | -3.27  | 8.20E-03 | 0.81  | 7.78E-01 | M-1 |
| ENSMMUG00000020160 | SEMA5A   | Semaphorin 5A                                        | 9.41   | 7.38   | 0.54  | 0.22  | -0.55 | 7.06E-01 | -5.92  | 2.69E-08 | 1.06  | 6.37E-01 | M-1 |
| ENSMMUG00000023419 |          |                                                      | 1.30   | 0.47   | 0.33  | 0.05  | -1.61 | 2.67E-01 | -3.01  | 2.54E-02 | -0.39 | 9.20E-01 | M-1 |
| ENSMMUG00000015489 | TRIO     | Trio Rho Guanine Nucleotide Exchange Factor          | 10.40  | 9.30   | 2.67  | 2.51  | 0.10  | 9.23E-01 | -2.07  | 2.27E-03 | 0.01  | 9.96E-01 | M-1 |
| ENSMMUG00000013364 | FBXL7    | F-box And Leucine Rich Repeat Protein 7              | 35.30  | 42.25  | 3.14  | 0.45  | -1.00 | 4.98E-01 | -5.52  | 1.15E-06 | -0.61 | 8.43E-01 | M-1 |
| ENSMMUG00000004389 | CDH18    | Cadherin 18                                          | 3.92   | 3.91   | 0.13  | 0.02  | -0.11 | 9.51E-01 | -4.32  | 3.20E-04 | -1.51 | 5.73E-01 | M-1 |
| ENSMMUG00000042872 |          |                                                      | 20.89  | 6.96   | 0.92  | 0.09  | -2.08 | 9.17E-02 | -4.43  | 7.20E-05 | -1.55 | 4.62E-01 | M-1 |
| ENSMMUG00000020275 | HIRIP3   | HIRA Interacting Protein 3                           | 37.10  | 35.75  | 18.36 | 7.03  | 0.23  | 7.99E-01 | -1.64  | 1.09E-02 | -0.92 | 4.00E-01 | M-1 |
| ENSMMUG00000043424 |          |                                                      | 4.58   | 7.63   | 7.33  | 5.37  | 1.12  | 8.50E-02 | -2.03  | 9.92E-04 | 0.99  | 3.24E-01 | M-1 |
| ENSMMUG00000004774 | MROH2B   | Maestro Heat Like Repeat Family Member 2B            | 1.78   | 0.74   | 0.21  | 0.07  | -1.61 | 1.72E-01 | -2.88  | 8.34E-03 | -0.53 | 8.52E-01 | M-1 |
| ENSMMUG00000011878 | PAIP1    | Poly(A) Binding Protein Interacting Protein 1        | 78.64  | 25.20  | 14.29 | 11.60 | -1.22 | 1.68E-01 | -2.26  | 4.13E-03 | 0.45  | 8.16E-01 | M-1 |
| ENSMMUG00000049039 |          |                                                      | 4.49   | 8.14   | 2.58  | 2.35  | 0.71  | 4.30E-01 | -2.16  | 4.83E-03 | 0.16  | 9.52E-01 | M-1 |
| ENSMMUG00000048323 |          |                                                      | 4.51   | 27.80  | 0.01  | 0.02  | 0.18  | 9.63E-01 | -10.03 | 1.17E-04 | 3.20  | 5.31E-01 | M-1 |
| ENSMMUG00000001600 | CDC20B   | Cell Division Cycle 20B                              | 13.19  | 12.56  | 0.44  | 0.08  | 0.59  | 6.75E-01 | -4.97  | 6.61E-07 | -2.75 | 5.38E-02 | M-1 |
| ENSMMUG00000010372 | CCNO     | Cyclin O                                             | 19.44  | 17.58  | 0.34  | 0.21  | -0.54 | 7.74E-01 | -5.73  | 2.27E-05 | -1.41 | 6.36E-01 | M-1 |
| ENSMMUG00000017904 | MAP1B    | Microtubule Associated Protein 1B                    | 16.77  | 25.69  | 3.05  | 6.04  | 0.84  | 3.05E-01 | -3.49  | 1.71E-07 | 1.41  | 1.73E-01 | M-1 |
| ENSMMUG00000017897 | ARHGEF28 | Rho Guanine Nucleotide Exchange Factor 28            | 8.76   | 7.09   | 0.50  | 0.28  | -1.17 | 3.48E-01 | -3.62  | 4.35E-04 | -0.50 | 8.58E-01 | M-1 |
| ENSMMUG00000011198 | FAM169A  | Family With Sequence Similarity 169 Member A         | 56.94  | 59.83  | 11.10 | 8.80  | -0.14 | 8.95E-01 | -2.23  | 1.04E-03 | -0.24 | 9.04E-01 | M-1 |
| ENSMMUG00000011061 | ANKRD31  | Ankyrin Repeat Domain 31                             | 1.34   | 1.09   | 0.16  | 0.26  | -0.21 | 8.73E-01 | -3.71  | 1.11E-05 | 1.42  | 3.19E-01 | M-1 |

|                     |          |                                                              |        |       |       |       |       |          |       |          |       |          |     |
|---------------------|----------|--------------------------------------------------------------|--------|-------|-------|-------|-------|----------|-------|----------|-------|----------|-----|
| ENSMMUG00000021354  | CRHBP    | Corticotropin Releasing Hormone Binding Protein              | 11.07  | 8.51  | 0.08  | 0.06  | -1.44 | 2.38E-01 | -5.83 | 6.03E-08 | 1.17  | 6.24E-01 | M-1 |
| ENSMMUG00000021358  | PDE8B    | Phosphodiesterase 8B                                         | 9.68   | 6.60  | 0.73  | 0.12  | -0.89 | 5.86E-01 | -4.90 | 7.21E-05 | -0.19 | 9.69E-01 | M-1 |
| ENSMMUG00000021361  | WDR41    | WD Repeat Domain 41                                          | 39.31  | 71.48 | 20.72 | 2.83  | 0.61  | 5.73E-01 | -2.85 | 6.02E-04 | -1.22 | 4.04E-01 | M-1 |
| ENSMMUG00000039925  | SCAMP1   | Secretory Carrier Membrane Protein 1                         | 14.09  | 11.16 | 4.10  | 3.82  | -0.24 | 7.93E-01 | -1.46 | 2.58E-02 | -0.36 | 8.19E-01 | M-1 |
| ENSMMUG00000023533  | SERINC5  | Serine Incorporator 5                                        | 37.07  | 34.72 | 8.17  | 14.07 | -0.09 | 9.29E-01 | -2.34 | 5.11E-05 | 1.32  | 1.18E-01 | M-1 |
| ENSMMUG00000039944  | RASGRF2  | Ras Protein Specific Guanine Nucleotide Releasing Factor 2   | 5.50   | 5.56  | 0.67  | 0.13  | -0.85 | 5.51E-01 | -4.04 | 2.43E-04 | 0.87  | 7.37E-01 | M-1 |
| ENSMMUG00000019836  | MEF2C    | Myocyte Enhancer Factor 2C                                   | 0.71   | 0.50  | 0.09  | 0.02  | 1.26  | 6.39E-01 | -7.69 | 2.20E-04 | 1.29  | 8.03E-01 | M-1 |
| ENSMMUG00000002508  | KIAA0825 | KIAA0825 Ortholog                                            | 1.37   | 3.50  | 1.75  | 0.10  | 0.34  | 8.64E-01 | -5.25 | 3.47E-05 | 0.59  | 8.66E-01 | M-1 |
| ENSMMUG00000001397  | MCTP1    | Multiple C2 And Transmembrane Domain Containing 1            | 25.11  | 12.96 | 2.51  | 0.49  | -1.07 | 3.90E-01 | -4.79 | 1.47E-06 | -0.38 | 9.00E-01 | M-1 |
| ENSMMUG000000021165 | RHOBTB3  | Rho Related BTB Domain Containing 3                          | 40.10  | 46.23 | 6.19  | 3.45  | 0.14  | 9.21E-01 | -3.85 | 6.52E-06 | 0.46  | 8.42E-01 | M-1 |
| ENSMMUG00000013109  | ST8SIA4  | ST8 Alpha-N-acetylneuraminide Alpha-2,8-sialyltransferase 4  | 2.83   | 0.74  | 0.03  | 0.02  | -2.67 | 7.88E-02 | -4.60 | 4.26E-03 | -0.51 | 9.20E-01 | M-1 |
| ENSMMUG00000013183  |          |                                                              | 1.06   | 0.56  | 0.48  | 0.93  | -0.27 | 9.14E-01 | -3.65 | 2.92E-02 | 3.41  | 1.43E-01 | M-1 |
| ENSMMUG00000013582  | FER      | FER Tyrosine Kinase                                          | 17.49  | 13.79 | 4.56  | 8.65  | -0.16 | 9.00E-01 | -2.05 | 1.26E-02 | 1.35  | 2.94E-01 | M-1 |
| ENSMMUG00000004275  |          |                                                              | 1.17   | 0.55  | 0.13  | 0.11  | -1.23 | 4.45E-01 | -6.10 | 9.96E-06 | 2.75  | 1.86E-01 | M-1 |
| ENSMMUG00000002768  | NREP     | Neuronal Regeneration Related Protein                        | 32.54  | 13.50 | 3.16  | 0.56  | -1.06 | 3.91E-01 | -6.11 | 8.78E-10 | 0.50  | 8.60E-01 | M-1 |
| ENSMMUG00000013557  | MCC      | Mutated In Colorectal Cancers                                | 4.38   | 3.21  | 0.18  | 0.36  | -1.33 | 4.38E-01 | -3.77 | 8.23E-03 | 0.91  | 7.92E-01 | M-1 |
| ENSMMUG00000043340  | ARL14EPL | ADP Ribosylation Factor Like GTPase 14 Effector Protein Like | 5.13   | 2.91  | 0.11  | 0.05  | -1.05 | 5.26E-01 | -5.01 | 8.50E-04 | -0.94 | 8.10E-01 | M-1 |
| ENSMMUG00000021009  | SRFBP1   | Serum Response Factor Binding Protein 1                      | 8.00   | 25.64 | 8.17  | 5.20  | 1.23  | 1.11E-01 | -1.69 | 1.88E-02 | 0.25  | 9.02E-01 | M-1 |
| ENSMMUG00000045976  |          |                                                              | 15.92  | 6.01  | 4.15  | 0.34  | -2.59 | 1.77E-01 | -4.55 | 1.23E-02 | 1.04  | 8.16E-01 | M-1 |
| ENSMMUG00000011214  | SLC12A2  | Solute Carrier Family 12 Member 2                            | 4.85   | 2.36  | 0.71  | 0.44  | -1.41 | 1.30E-01 | -1.96 | 2.44E-02 | -0.64 | 7.41E-01 | M-1 |
| ENSMMUG00000042358  | MEIKIN   | Meiotic Kinetochore Factor                                   | 10.97  | 5.71  | 1.13  | 0.69  | -1.00 | 5.22E-01 | -3.19 | 1.25E-02 | -0.05 | 9.92E-01 | M-1 |
| ENSMMUG00000010313  | KIF3A    | Kinesin Family Member 3A                                     | 39.27  | 21.41 | 8.96  | 5.97  | -1.25 | 9.37E-02 | -1.48 | 3.90E-02 | -0.02 | 9.94E-01 | M-1 |
| ENSMMUG00000010308  |          |                                                              | 32.36  | 27.04 | 2.29  | 0.22  | -0.35 | 8.41E-01 | -4.51 | 6.53E-05 | -2.18 | 2.45E-01 | M-1 |
| ENSMMUG00000010309  | SEPT8    | Septin 8                                                     | 6.59   | 10.42 | 2.51  | 6.49  | 0.60  | 5.36E-01 | -2.43 | 1.45E-03 | 1.62  | 1.49E-01 | M-1 |
| ENSMMUG00000044819  | GDF9     | Growth Differentiation Factor 9                              | 240.02 | 73.33 | 22.24 | 1.30  | -1.82 | 5.14E-02 | -3.41 | 5.85E-05 | -1.92 | 1.28E-01 | M-1 |
| ENSMMUG00000010571  |          |                                                              | 1.42   | 3.29  | 1.40  | 1.34  | 1.63  | 6.22E-02 | -2.18 | 9.71E-03 | 0.18  | 9.52E-01 | M-1 |
| ENSMMUG00000003062  | FSTL4    | Follistatin Like 4                                           | 6.77   | 9.88  | 0.12  | 0.44  | 0.24  | 8.91E-01 | -7.09 | 7.88E-12 | 1.94  | 2.61E-01 | M-1 |
| ENSMMUG00000004770  | NEUROG1  | Neurogenin 1                                                 | 11.48  | 9.79  | 0.26  | 0.19  | -0.53 | 7.72E-01 | -5.72 | 2.21E-05 | -0.02 | 9.97E-01 | M-1 |
| ENSMMUG00000040964  |          |                                                              | 12.25  | 5.22  | 0.13  | 0.10  | -1.96 | 4.49E-01 | -5.96 | 1.10E-02 | 0.73  | 9.18E-01 | M-1 |
| ENSMMUG00000001507  | BRD8     | Bromodomain Containing 8                                     | 16.87  | 24.20 | 7.49  | 10.26 | 0.42  | 5.93E-01 | -1.77 | 3.58E-03 | 0.17  | 9.31E-01 | M-1 |
| ENSMMUG00000013272  | GFRA3    | GDNF Family Receptor Alpha 3                                 | 15.02  | 13.08 | 3.33  | 0.24  | -0.32 | 8.57E-01 | -5.31 | 2.48E-06 | -1.08 | 6.59E-01 | M-1 |
| ENSMMUG00000018025  | EGR1     | Early Growth Response 1                                      | 19.72  | 17.75 | 4.41  | 1.38  | -0.53 | 6.32E-01 | -4.81 | 1.85E-09 | 1.08  | 4.78E-01 | M-1 |
| ENSMMUG00000020666  | UBE2D2   | Ubiquitin Conjugating Enzyme E2 D2                           | 17.10  | 18.38 | 7.92  | 11.61 | -0.08 | 9.37E-01 | -2.12 | 8.72E-04 | 1.40  | 1.30E-01 | M-1 |
| ENSMMUG00000012593  | FCHSD1   | FCH And Double SH3 Domains 1                                 | 0.12   | 1.74  | 0.42  | 0.70  | 3.04  | 9.36E-02 | -4.02 | 2.03E-02 | 2.11  | 4.84E-01 | M-1 |
| ENSMMUG00000000465  | ARAP3    | ArfGAP With RhoGAP Domain, Ankyrin Repeat And PH Domain 3    | 1.70   | 1.25  | 0.38  | 0.10  | -0.37 | 8.45E-01 | -5.05 | 4.54E-05 | -0.74 | 8.15E-01 | M-1 |
| ENSMMUG00000006287  | KIAA0141 | KIAA0141 Ortholog                                            | 8.45   | 20.61 | 2.63  | 4.13  | 2.21  | 1.11E-01 | -3.53 | 5.43E-03 | 0.51  | 8.87E-01 | M-1 |
| ENSMMUG00000014175  | SPRY4    | Sprouty RTK Signaling Antagonist 4                           | 25.59  | 20.53 | 7.41  | 12.21 | -0.83 | 2.30E-01 | -1.67 | 5.81E-03 | 0.67  | 5.59E-01 | M-1 |
| ENSMMUG00000000421  | NR3C1    | Nuclear Receptor Subfamily 3 Group C Member 1                | 4.33   | 2.98  | 0.42  | 0.88  | -1.59 | 1.83E-01 | -2.45 | 2.66E-02 | 1.17  | 5.69E-01 | M-1 |

|                      |          |                                                                |        |        |       |       |       |          |       |          |       |          |     |
|----------------------|----------|----------------------------------------------------------------|--------|--------|-------|-------|-------|----------|-------|----------|-------|----------|-----|
| ENSMMUG00000004476   | RBM27    | RNA Binding Motif Protein 27                                   | 55.37  | 98.94  | 35.70 | 21.68 | 0.69  | 1.88E-01 | -1.73 | 1.17E-04 | -0.24 | 8.39E-01 | M-1 |
| ENSMMUG000000020465  | PPP2R2B  | Protein Phosphatase 2 Regulatory Subunit Bbeta                 | 6.25   | 3.33   | 2.29  | 0.08  | -1.06 | 5.23E-01 | -5.54 | 6.44E-05 | 0.17  | 9.73E-01 | M-1 |
| ENSMMUG000000013394  | JAKMIP2  | Janus Kinase And Microtubule Interacting Protein 2             | 3.55   | 1.92   | 0.79  | 0.02  | -0.68 | 7.04E-01 | -4.40 | 8.95E-04 | -2.51 | 2.45E-01 | M-1 |
| ENSMMUG000000011556  | CSF1R    | Colony Stimulating Factor 1 Receptor                           | 13.77  | 25.65  | 1.30  | 0.59  | 1.21  | 3.33E-01 | -4.80 | 2.21E-06 | -0.89 | 6.99E-01 | M-1 |
| ENSMMUG000000020678  | SYNPO    | Synaptopodin                                                   | 8.86   | 12.60  | 1.52  | 0.48  | 0.26  | 8.51E-01 | -3.62 | 4.05E-05 | -1.18 | 4.75E-01 | M-1 |
| ENSMMUG000000020683  | RBM22    | RNA Binding Motif Protein 22                                   | 46.17  | 70.79  | 23.97 | 11.51 | 0.68  | 4.22E-01 | -1.62 | 2.38E-02 | -0.64 | 6.61E-01 | M-1 |
| ENSMMUG000000012696  | ZNF300   | Zinc Finger Protein 300                                        | 2.48   | 4.69   | 2.88  | 1.23  | 1.09  | 3.65E-01 | -2.14 | 4.27E-02 | -0.94 | 6.53E-01 | M-1 |
| ENSMMUG000000003499  | SLC36A1  | Solute Carrier Family 36 Member 1                              | 10.90  | 20.08  | 2.69  | 4.02  | 1.15  | 3.83E-01 | -3.38 | 1.99E-03 | 0.69  | 7.98E-01 | M-1 |
| ENSMMUG000000011989  | MFAP3    | Microfibril Associated Protein 3                               | 12.55  | 7.15   | 4.25  | 4.23  | -0.73 | 2.92E-01 | -1.26 | 4.22E-02 | 0.04  | 9.86E-01 | M-1 |
| ENSMMUG000000021550  |          |                                                                | 40.76  | 16.95  | 2.22  | 0.32  | -1.28 | 3.15E-01 | -4.63 | 1.37E-05 | -0.84 | 7.45E-01 | M-1 |
| ENSMMUG000000011471  | TTC1     | Tetratricopeptide Repeat Domain 1                              | 102.04 | 94.42  | 41.99 | 20.87 | -0.27 | 6.67E-01 | -1.29 | 5.42E-03 | -0.57 | 5.06E-01 | M-1 |
| ENSMMUG000000023073  | CCNJL    | Cyclin J Like                                                  | 2.69   | 5.44   | 0.10  | 0.06  | 0.09  | 9.71E-01 | -5.04 | 3.90E-04 | 0.64  | 8.73E-01 | M-1 |
| ENSMMUG000000012643  | ATP10B   | ATPase Phospholipid Transporting 10B (putative)                | 5.11   | 4.37   | 0.60  | 0.05  | -1.24 | 3.87E-01 | -4.14 | 5.12E-04 | -1.65 | 4.53E-01 | M-1 |
| ENSMMUG000000009116  | TENM2    | Teneurin Transmembrane Protein 2                               | 1.51   | 2.19   | 0.49  | 0.13  | -0.22 | 9.12E-01 | -3.06 | 1.65E-02 | -1.63 | 4.65E-01 | M-1 |
| ENSMMUG000000017087  |          |                                                                | 9.53   | 11.96  | 2.08  | 0.71  | 0.29  | 8.21E-01 | -3.58 | 3.27E-05 | -1.21 | 4.40E-01 | M-1 |
| ENSMMUG000000013793  | BOD1     | Biorientation Of Chromosomes In Cell Division 1                | 524.49 | 647.97 | 94.21 | 19.43 | 0.41  | 6.76E-01 | -3.86 | 1.69E-08 | -1.17 | 3.17E-01 | M-1 |
| ENSMMUG000000019926  | CPEB4    | Cytoplasmic Polyadenylation Element Binding Protein 4          | 26.27  | 15.44  | 6.62  | 6.36  | -1.19 | 7.29E-02 | -1.84 | 2.74E-03 | 0.59  | 6.39E-01 | M-1 |
| ENSMMUG000000011491  | NSG2     | Neuronal Vesicle Trafficking Associated 2                      | 44.24  | 20.58  | 3.56  | 0.26  | -2.32 | 5.02E-02 | -4.26 | 9.63E-05 | -2.45 | 1.36E-01 | M-1 |
| ENSMMUG000000014245  | HRH2     | Histamine Receptor H2                                          | 41.51  | 32.71  | 4.83  | 0.42  | -0.33 | 8.19E-01 | -5.35 | 1.34E-08 | -0.67 | 7.79E-01 | M-1 |
| ENSMMUG000000009058  | CLTB     | Clathrin Light Chain B                                         | 9.15   | 5.15   | 1.93  | 2.54  | -0.40 | 7.36E-01 | -2.39 | 5.73E-03 | 0.84  | 6.35E-01 | M-1 |
| ENSMMUG000000002653  | HK3      | Hexokinase 3                                                   | 19.04  | 14.11  | 0.58  | 0.16  | -1.27 | 2.70E-01 | -5.22 | 4.13E-08 | -0.66 | 7.85E-01 | M-1 |
| ENSMMUG0000000022838 | UIMC1    | Ubiquitin Interaction Motif Containing 1                       | 7.10   | 7.30   | 2.49  | 2.01  | 0.10  | 9.41E-01 | -1.71 | 4.83E-02 | -0.44 | 8.36E-01 | M-1 |
| ENSMMUG000000011033  | ZNF346   | Zinc Finger Protein 346                                        | 15.69  | 18.60  | 4.68  | 5.39  | -0.04 | 9.80E-01 | -2.16 | 2.82E-02 | 0.31  | 9.13E-01 | M-1 |
| ENSMMUG000000001728  | MAPK9    | Mitogen-activated Protein Kinase 9                             | 20.83  | 16.16  | 4.71  | 4.43  | -0.64 | 4.53E-01 | -1.92 | 6.14E-03 | 0.89  | 4.77E-01 | M-1 |
| ENSMMUG000000042832  | ZFP62    | ZFP62 Zinc Finger Protein                                      | 10.37  | 8.71   | 3.38  | 2.64  | -0.55 | 5.80E-01 | -2.70 | 4.09E-04 | 1.04  | 4.53E-01 | M-1 |
| ENSMMUG000000019858  | BTNL8    | Butyrophilin Like 8                                            | 0.89   | 1.66   | 1.04  | 0.07  | 1.70  | 3.08E-01 | -4.20 | 3.37E-03 | -0.96 | 7.83E-01 | M-1 |
| ENSMMUG000000001371  | SLC22A23 | Solute Carrier Family 22 Member 23                             | 2.16   | 1.60   | 0.10  | 0.42  | 0.08  | 9.71E-01 | -4.51 | 5.49E-04 | 2.13  | 3.25E-01 | M-1 |
| ENSMMUG000000041553  |          |                                                                | 0.60   | 1.03   | 0.02  | 0.05  | 1.47  | 6.24E-01 | -6.41 | 7.84E-03 | 1.85  | 7.43E-01 | M-1 |
| ENSMMUG000000015577  | RIOK1    | RIO Kinase 1                                                   | 130.95 | 161.12 | 97.40 | 40.05 | 0.06  | 9.11E-01 | -0.78 | 3.97E-02 | -0.89 | 7.03E-02 | M-1 |
| ENSMMUG000000021600  |          |                                                                | 29.31  | 20.49  | 1.33  | 1.62  | -0.13 | 9.40E-01 | -4.98 | 2.53E-06 | 0.82  | 7.51E-01 | M-1 |
| ENSMMUG000000005532  | MAK      | Male Germ Cell Associated Kinase                               | 2.43   | 1.91   | 1.34  | 0.98  | -0.57 | 5.14E-01 | -2.31 | 8.78E-04 | 1.13  | 3.22E-01 | M-1 |
| ENSMMUG000000013908  | ELOVL2   | ELOVL Fatty Acid Elongase 2                                    | 8.37   | 9.09   | 4.23  | 0.65  | -0.29 | 8.66E-01 | -5.38 | 3.90E-07 | 2.12  | 2.12E-01 | M-1 |
| ENSMMUG000000008560  | HIVEP1   | Human Immunodeficiency Virus Type I Enhancer Binding Protein 1 | 14.97  | 25.01  | 8.04  | 6.53  | 0.81  | 2.79E-01 | -2.19 | 5.74E-04 | 0.01  | 9.97E-01 | M-1 |
| ENSMMUG000000020122  | RANBP9   | RAN Binding Protein 9                                          | 116.00 | 110.60 | 45.84 | 31.05 | 0.06  | 9.53E-01 | -1.34 | 3.39E-02 | -0.22 | 9.00E-01 | M-1 |
| ENSMMUG000000015474  | MYLIP    | Myosin Regulatory Light Chain Interacting Protein              | 18.38  | 7.10   | 4.86  | 1.77  | -1.32 | 1.88E-01 | -1.86 | 4.53E-02 | -0.25 | 9.28E-01 | M-1 |
| ENSMMUG000000002940  | ATXN1    | Ataxin 1                                                       | 2.42   | 1.93   | 0.56  | 0.15  | -0.20 | 8.88E-01 | -3.88 | 9.90E-06 | -0.21 | 9.48E-01 | M-1 |
| ENSMMUG000000018575  | KDM1B    | Lysine Demethylase 1B                                          | 94.95  | 55.22  | 9.09  | 4.43  | -0.89 | 3.06E-01 | -2.55 | 4.51E-04 | -1.13 | 3.61E-01 | M-1 |
| ENSMMUG000000008452  | DCDC2    | Doublecortin Domain Containing 2                               | 221.20 | 157.27 | 21.24 | 2.89  | -1.18 | 2.48E-01 | -4.15 | 1.10E-06 | -1.47 | 3.09E-01 | M-1 |

|                     |            |                                                             |        |        |        |       |       |          |       |          |       |          |     |
|---------------------|------------|-------------------------------------------------------------|--------|--------|--------|-------|-------|----------|-------|----------|-------|----------|-----|
| ENSMMUG00000017497  | RIPOR2     | RHO Family Interacting Cell Polarization Regulator 2        | 15.00  | 9.92   | 2.46   | 2.59  | -0.81 | 5.36E-01 | -2.82 | 6.80E-03 | -0.27 | 9.36E-01 | M-1 |
| ENSMMUG00000041140  | HIST1H3D   | Histone Cluster 1, H3d                                      | 145.42 | 328.11 | 110.56 | 74.00 | 1.06  | 2.68E-01 | -2.04 | 1.52E-02 | -1.64 | 1.80E-01 | M-1 |
| ENSMMUG00000047143  | LOC701826  | Histone H2A Type 1-H                                        | 148.32 | 418.06 | 107.27 | 82.15 | 1.42  | 7.22E-02 | -2.33 | 1.27E-03 | -1.18 | 3.19E-01 | M-1 |
| ENSMMUG00000049230  |            |                                                             | 271.37 | 196.68 | 97.81  | 44.08 | -0.22 | 8.05E-01 | -1.75 | 5.00E-03 | -0.21 | 9.12E-01 | M-1 |
| ENSMMUG00000037625  |            |                                                             | 12.36  | 16.46  | 2.01   | 2.07  | 0.02  | 9.91E-01 | -4.27 | 8.40E-05 | 1.33  | 5.26E-01 | M-1 |
| ENSMMUG00000019959  | C4H6orf136 | Chromosome 4 Open Reading Frame, Human C6orf136             | 15.07  | 20.61  | 6.37   | 4.92  | 0.57  | 6.69E-01 | -2.46 | 1.65E-02 | -0.12 | 9.74E-01 | M-1 |
| ENSMMUG00000017194  | NRM        | Nurim                                                       | 0.65   | 1.35   | 0.13   | 1.53  | 2.33  | 2.15E-01 | -3.65 | 3.87E-02 | 2.40  | 4.00E-01 | M-1 |
| ENSMMUG00000029821  |            |                                                             | 59.76  | 47.07  | 8.83   | 11.51 | -0.77 | 3.51E-01 | -2.58 | 1.46E-04 | 0.38  | 8.28E-01 | M-1 |
| ENSMMUG00000000729  | CFB        | Complement Factor B                                         | 0.39   | 3.45   | 0.20   | 0.57  | 2.38  | 1.43E-01 | -5.39 | 1.81E-04 | 2.77  | 2.15E-01 | M-1 |
| ENSMMUG00000000747  | STK19      | Serine/threonine Kinase 19                                  | 0.73   | 2.08   | 0.61   | 2.02  | 1.94  | 2.12E-01 | -2.92 | 4.38E-02 | 2.14  | 3.49E-01 | M-1 |
| ENSMMUG00000010649  | PHF1       | PHD Finger Protein 1                                        | 2.02   | 0.88   | 0.31   | 0.68  | -1.53 | 2.28E-01 | -2.43 | 3.74E-02 | 2.48  | 1.19E-01 | M-1 |
| ENSMMUG00000023046  | GRM4       | Glutamate Metabotropic Receptor 4                           | 2.20   | 1.18   | 0.22   | 0.19  | -1.91 | 2.44E-01 | -5.10 | 3.98E-04 | 3.64  | 6.37E-02 | M-1 |
| ENSMMUG00000022824  | SPDEF      | SAM Pointed Domain Containing ETS Transcription Factor      | 40.79  | 38.98  | 17.11  | 8.61  | -0.22 | 7.97E-01 | -1.61 | 7.41E-03 | -0.43 | 7.53E-01 | M-1 |
| ENSMMUG00000021712  | UHRF1BP1   | UHRF1 Binding Protein 1                                     | 6.60   | 9.88   | 2.75   | 2.90  | 0.87  | 5.81E-01 | -2.84 | 2.42E-02 | 0.44  | 9.03E-01 | M-1 |
| ENSMMUG00000021718  | ANKS1A     | Ankyrin Repeat And Sterile Alpha Motif Domain Containing 1A | 28.57  | 26.64  | 5.00   | 3.35  | -0.09 | 9.45E-01 | -3.57 | 2.01E-06 | 0.15  | 9.59E-01 | M-1 |
| ENSMMUG00000021720  | TCP11      | T-complex 11                                                | 8.10   | 11.86  | 0.45   | 0.25  | 0.12  | 9.48E-01 | -4.15 | 2.18E-04 | -1.12 | 6.43E-01 | M-1 |
| ENSMMUG00000015904  | PPARD      | Peroxisome Proliferator Activated Receptor Delta            | 7.54   | 13.63  | 2.71   | 2.37  | 1.21  | 2.57E-01 | -3.27 | 2.92E-04 | 0.27  | 9.26E-01 | M-1 |
| ENSMMUG00000018557  | SRPK1      | SRSF Protein Kinase 1                                       | 99.00  | 95.95  | 30.75  | 17.72 | 0.01  | 9.95E-01 | -2.27 | 1.42E-04 | -0.28 | 8.67E-01 | M-1 |
| ENSMMUG00000020558  | STK38      | Serine/threonine Kinase 38                                  | 41.96  | 34.36  | 22.84  | 12.10 | -0.17 | 8.93E-01 | -1.68 | 4.38E-02 | 0.60  | 7.41E-01 | M-1 |
| ENSMMUG00000001287  | RNF8       | Ring Finger Protein 8                                       | 21.22  | 44.28  | 7.13   | 7.21  | 0.91  | 3.14E-01 | -2.89 | 9.54E-05 | 0.23  | 9.20E-01 | M-1 |
| ENSMMUG00000001632  | ZFAND3     | Zinc Finger AN1-type Containing 3                           | 32.47  | 16.87  | 10.12  | 7.76  | -0.47 | 5.60E-01 | -1.64 | 1.15E-02 | 0.44  | 7.68E-01 | M-1 |
| ENSMMUG000000019072 | DAAM2      | Dishevelled Associated Activator Of Morphogenesis 2         | 18.41  | 7.80   | 0.42   | 1.06  | -0.87 | 4.45E-01 | -4.31 | 1.50E-06 | 0.60  | 7.92E-01 | M-1 |
| ENSMMUG000000039605 |            |                                                             | 2.58   | 1.89   | 0.64   | 0.01  | -0.64 | 8.57E-01 | -6.47 | 1.17E-02 | 0.29  | 9.75E-01 | M-1 |
| ENSMMUG00000004419  | CCND3      | Cyclin D3                                                   | 1.01   | 1.84   | 1.82   | 3.75  | 1.62  | 2.35E-01 | -2.62 | 3.55E-02 | 2.63  | 1.22E-01 | M-1 |
| ENSMMUG00000023319  | TJAP1      | Tight Junction Associated Protein 1                         | 10.03  | 7.98   | 2.09   | 1.32  | 0.41  | 7.95E-01 | -3.34 | 2.47E-03 | 0.12  | 9.76E-01 | M-1 |
| ENSMMUG00000014389  | CDC5L      | Cell Division Cycle 5 Like                                  | 86.62  | 93.10  | 36.30  | 17.77 | 0.09  | 9.18E-01 | -1.44 | 1.31E-02 | -0.77 | 4.46E-01 | M-1 |
| ENSMMUG000000019819 | LOC703331  | Runt-related Transcription Factor 2                         | 3.92   | 2.72   | 0.59   | 0.09  | -1.54 | 3.29E-01 | -4.91 | 2.15E-04 | 1.41  | 6.04E-01 | M-1 |
| ENSMMUG000000019246 | RCAN2      | Regulator Of Calcineurin 2                                  | 38.72  | 12.78  | 5.27   | 0.96  | -1.63 | 8.75E-02 | -3.84 | 5.64E-06 | -0.06 | 9.86E-01 | M-1 |
| ENSMMUG000000048193 | CENPQ      | Centromere Protein Q                                        | 18.90  | 26.68  | 5.55   | 3.44  | 0.39  | 6.31E-01 | -2.46 | 4.68E-05 | -0.47 | 7.43E-01 | M-1 |
| ENSMMUG000000013718 | TRAM2      | Translocation Associated Membrane Protein 2                 | 218.43 | 230.19 | 23.29  | 9.05  | -0.24 | 8.61E-01 | -4.18 | 9.83E-07 | -0.54 | 8.06E-01 | M-1 |
| ENSMMUG000000040666 | GSTA2      | Glutathione S-transferase Alpha 2                           | 0.56   | 4.93   | 0.15   | 0.08  | 3.88  | 1.16E-01 | -8.75 | 1.48E-04 | 4.75  | 1.65E-01 | M-1 |
| ENSMMUG000000022083 | GCM1       | Glial Cells Missing Homolog 1                               | 4.53   | 10.10  | 2.58   | 3.70  | 1.80  | 2.98E-01 | -6.62 | 6.09E-06 | 3.55  | 8.44E-02 | M-1 |
| ENSMMUG000000006422 | ELOVL5     | ELOVL Fatty Acid Elongase 5                                 | 35.64  | 35.25  | 8.82   | 11.97 | 0.05  | 9.55E-01 | -3.06 | 4.82E-08 | 0.83  | 4.21E-01 | M-1 |
| ENSMMUG000000007616 | COL21A1    | Collagen Type XXI Alpha 1 Chain                             | 0.96   | 0.86   | 0.29   | 0.07  | 0.26  | 9.15E-01 | -4.29 | 7.60E-03 | -1.65 | 6.08E-01 | M-1 |
| ENSMMUG00000000777  | DST        | Dystonin                                                    | 1.22   | 1.24   | 0.49   | 1.83  | -0.34 | 7.92E-01 | -2.03 | 2.92E-02 | 2.32  | 5.30E-02 | M-1 |
| ENSMMUG000000021274 |            |                                                             | 21.37  | 20.77  | 7.57   | 3.84  | -0.11 | 8.98E-01 | -2.23 | 5.99E-05 | -0.31 | 8.32E-01 | M-1 |
| ENSMMUG000000019436 | FAM117A    | Family With Sequence Similarity 117 Member A                | 13.87  | 9.34   | 4.09   | 0.96  | -1.03 | 4.95E-01 | -2.53 | 4.69E-02 | 0.05  | 9.92E-01 | M-1 |
| ENSMMUG000000019261 | COL12A1    | Collagen Type XII Alpha 1 Chain                             | 1.87   | 0.76   | 0.21   | 0.08  | -1.79 | 6.14E-02 | -3.23 | 3.14E-04 | 0.14  | 9.69E-01 | M-1 |
| ENSMMUG000000004351 | HMG3       | High Mobility Group Nucleosomal Binding Domain 3            | 2.12   | 0.58   | 0.28   | 0.14  | -0.92 | 7.38E-01 | -5.74 | 7.56E-03 | 0.58  | 9.31E-01 | M-1 |
| ENSMMUG000000020208 | ELOVL4     | ELOVL Fatty Acid Elongase 4                                 | 56.26  | 34.14  | 4.32   | 1.23  | -1.78 | 8.00E-02 | -2.49 | 9.57E-03 | -0.99 | 6.05E-01 | M-1 |
| ENSMMUG000000020207 | TTK        | TTK Protein Kinase                                          | 32.24  | 22.65  | 11.71  | 10.20 | -0.25 | 7.75E-01 | -1.70 | 5.31E-03 | 0.49  | 7.19E-01 | M-1 |



|                     |           |                                                                |        |        |       |       |       |          |        |          |       |          |     |
|---------------------|-----------|----------------------------------------------------------------|--------|--------|-------|-------|-------|----------|--------|----------|-------|----------|-----|
| ENSMMUG00000016703  | SNAP91    | Synaptosome Associated Protein 91                              | 10.61  | 7.24   | 1.85  | 0.10  | -0.64 | 6.23E-01 | -5.67  | 5.19E-09 | -0.73 | 7.68E-01 | M-1 |
| ENSMMUG00000045108  | CFAP206   | Cilia And Flagella Associated Protein 206                      | 9.72   | 4.59   | 0.12  | 0.19  | -2.12 | 7.63E-02 | -4.13  | 2.59E-04 | 0.09  | 9.84E-01 | M-1 |
| ENSMMUG00000017039  | RARS2     | Arginyl-tRNA Synthetase 2, Mitochondrial                       | 66.28  | 39.97  | 7.68  | 9.71  | -1.10 | 1.43E-01 | -1.62  | 1.92E-02 | 0.14  | 9.56E-01 | M-1 |
| ENSMMUG00000002824  | AKIRIN2   | Akirin 2                                                       | 100.82 | 50.17  | 29.76 | 12.35 | -0.81 | 2.62E-01 | -1.43  | 2.61E-02 | 0.00  | 9.99E-01 | M-1 |
| ENSMMUG00000014942  | PM20D2    | Peptidase M20 Domain Containing 2                              | 4.22   | 1.88   | 0.35  | 0.64  | -1.38 | 2.56E-01 | -2.49  | 2.44E-02 | 0.23  | 9.53E-01 | M-1 |
| ENSMMUG00000003462  | ANKRD6    | Ankyrin Repeat Domain 6                                        | 9.32   | 8.68   | 3.30  | 1.06  | -0.13 | 9.18E-01 | -2.17  | 4.95E-03 | -0.43 | 8.27E-01 | M-1 |
| ENSMMUG000000037890 |           |                                                                | 11.83  | 17.98  | 2.40  | 0.07  | -0.45 | 8.53E-01 | -3.93  | 3.67E-02 | -3.42 | 2.36E-01 | M-1 |
| ENSMMUG000000038684 |           |                                                                | 19.35  | 15.77  | 0.50  | 0.08  | -2.11 | 2.72E-01 | -5.42  | 1.63E-03 | -0.02 | 9.98E-01 | M-1 |
| ENSMMUG00000005093  | KLHL32    | Kelch Like Family Member 32                                    | 2.36   | 0.68   | 0.06  | 0.01  | -2.10 | 2.71E-01 | -5.32  | 2.75E-03 | -0.49 | 9.38E-01 | M-1 |
| ENSMMUG00000040203  | MMS22L    | MMS22 Like, DNA Repair Protein                                 | 13.37  | 12.24  | 5.45  | 5.45  | 0.05  | 9.60E-01 | -1.33  | 4.78E-02 | -1.11 | 2.66E-01 | M-1 |
| ENSMMUG00000041172  |           |                                                                | 12.62  | 46.00  | 10.62 | 13.21 | 1.05  | 3.02E-01 | -1.92  | 3.66E-02 | -0.97 | 5.71E-01 | M-1 |
| ENSMMUG00000013483  | PREP      | Prolyl Endopeptidase                                           | 26.36  | 40.91  | 10.28 | 4.80  | 0.59  | 5.16E-01 | -2.16  | 2.88E-03 | -0.37 | 8.42E-01 | M-1 |
| ENSMMUG00000043733  |           |                                                                | 2.65   | 1.76   | 0.11  | 0.02  | -0.78 | 8.17E-01 | -7.85  | 1.56E-03 | -0.93 | 9.01E-01 | M-1 |
| ENSMMUG00000045075  |           |                                                                | 144.27 | 171.08 | 39.37 | 32.32 | -0.07 | 9.57E-01 | -2.22  | 4.94E-03 | -0.37 | 8.60E-01 | M-1 |
| ENSMMUG00000011169  | TIAM2     | T-cell Lymphoma Invasion And Metastasis 2                      | 17.24  | 10.86  | 1.46  | 0.61  | -0.45 | 7.40E-01 | -4.03  | 1.67E-05 | 0.11  | 9.76E-01 | M-1 |
| ENSMMUG00000019048  | SYNE1     | Spectrin Repeat Containing Nuclear Envelope Protein 1          | 15.13  | 12.44  | 0.70  | 1.11  | -0.63 | 4.93E-01 | -4.23  | 1.28E-09 | 0.75  | 6.13E-01 | M-1 |
| ENSMMUG00000029475  | ZBTB2     | Zinc Finger And BTB Domain Containing 2                        | 17.12  | 24.28  | 5.29  | 5.83  | 0.78  | 4.18E-01 | -2.18  | 6.33E-03 | -0.10 | 9.74E-01 | M-1 |
| ENSMMUG00000019772  | PLEKHG1   | Pleckstrin Homology And RhoGEF Domain Containing G1            | 18.45  | 9.49   | 1.32  | 2.64  | -0.53 | 6.73E-01 | -5.04  | 1.60E-08 | 1.58  | 2.89E-01 | M-1 |
| ENSMMUG00000019443  | STX11     | Syntaxin 11                                                    | 3.82   | 10.64  | 3.33  | 0.90  | 1.93  | 2.06E-01 | -5.61  | 2.42E-05 | 1.91  | 4.35E-01 | M-1 |
| ENSMMUG00000003750  | PLAGL1    | PLAG1 Like Zinc Finger 1                                       | 1.07   | 0.73   | 0.01  | 0.02  | -0.78 | 6.89E-01 | -6.19  | 3.22E-05 | 2.57  | 3.12E-01 | M-1 |
| ENSMMUG00000019927  | ARFGEF3   | ARFGEF Family Member 3                                         | 3.27   | 1.25   | 0.15  | 0.09  | -1.71 | 2.04E-01 | -4.39  | 2.12E-04 | 0.18  | 9.69E-01 | M-1 |
| ENSMMUG00000016373  |           |                                                                | 15.14  | 12.48  | 5.06  | 12.50 | -0.21 | 8.43E-01 | -1.59  | 3.13E-02 | 0.80  | 5.54E-01 | M-1 |
| ENSMMUG00000003708  | PDE7B     | Phosphodiesterase 7B                                           | 1.05   | 0.52   | 0.15  | 0.02  | -1.26 | 5.42E-01 | -6.15  | 5.99E-04 | -0.95 | 8.30E-01 | M-1 |
| ENSMMUG00000009368  | AHI1      | Abelson Helper Integration Site 1                              | 1.65   | 4.08   | 0.83  | 0.83  | 1.00  | 3.34E-01 | -2.84  | 1.27E-03 | -0.07 | 9.85E-01 | M-1 |
| ENSMMUG00000007758  | EPB41L2   | Erythrocyte Membrane Protein Band 4.1 Like 2                   | 57.89  | 57.69  | 7.26  | 2.61  | -0.17 | 8.77E-01 | -3.81  | 1.86E-08 | -1.12 | 3.43E-01 | M-1 |
| ENSMMUG00000042270  |           |                                                                | 6.37   | 0.98   | 0.09  | 0.02  | -2.65 | 2.46E-01 | -4.81  | 2.92E-02 | 1.26  | 8.17E-01 | M-1 |
| ENSMMUG000000038120 |           |                                                                | 4.81   | 3.54   | 0.11  | 0.00  | -3.26 | 4.46E-01 | -18.67 | 5.22E-08 | 0.87  | 9.46E-01 | M-1 |
| ENSMMUG00000029421  |           |                                                                | 49.60  | 56.22  | 4.05  | 0.56  | 0.16  | 9.17E-01 | -5.31  | 2.86E-09 | -1.11 | 5.40E-01 | M-1 |
| ENSMMUG00000040490  |           |                                                                | 37.14  | 9.25   | 0.48  | 0.63  | -2.52 | 1.26E-01 | -4.05  | 1.08E-02 | -0.58 | 8.98E-01 | M-1 |
| ENSMMUG00000009491  | HEY2      | Hes Related Family BHLH Transcription Factor With YRPW Motif 2 | 11.30  | 9.79   | 1.90  | 0.75  | -0.60 | 6.92E-01 | -5.05  | 3.36E-06 | -1.68 | 3.94E-01 | M-1 |
| ENSMMUG00000007911  | SERINC1   | Serine Incorporator 1                                          | 22.07  | 27.80  | 16.01 | 10.65 | 0.32  | 6.65E-01 | -1.91  | 3.34E-04 | 0.76  | 4.22E-01 | M-1 |
| ENSMMUG00000007910  | HSF2      | Heat Shock Transcription Factor 2                              | 2.95   | 5.36   | 1.15  | 1.89  | 1.29  | 3.56E-01 | -2.99  | 1.26E-02 | 1.23  | 5.97E-01 | M-1 |
| ENSMMUG00000001806  | ZUFSP     | Zinc Finger With UFM1 Specific Peptidase Domain                | 7.16   | 7.19   | 1.91  | 5.99  | 0.01  | 9.96E-01 | -1.86  | 1.73E-02 | 0.80  | 5.97E-01 | M-1 |
| ENSMMUG00000007409  | DSE       | Dermatan Sulfate Epimerase                                     | 4.31   | 1.92   | 0.14  | 0.04  | -1.22 | 4.37E-01 | -6.11  | 5.86E-06 | 0.90  | 7.97E-01 | M-1 |
| ENSMMUG000000037901 |           |                                                                | 29.08  | 10.54  | 8.90  | 3.65  | -1.52 | 1.13E-01 | -2.04  | 2.49E-02 | 0.54  | 8.04E-01 | M-1 |
| ENSMMUG00000002174  | TRAF3IP2  | TRAF3 Interacting Protein 2                                    | 5.97   | 1.96   | 0.69  | 1.04  | -0.49 | 7.40E-01 | -2.55  | 1.91E-02 | 1.13  | 5.91E-01 | M-1 |
| ENSMMUG00000017520  | MFSD4B    | Major Facilitator Superfamily Domain Containing 4B             | 2.88   | 4.00   | 1.18  | 2.50  | 0.36  | 8.12E-01 | -2.42  | 2.54E-02 | 0.81  | 7.38E-01 | M-1 |
| ENSMMUG00000014764  | WASF1     | WAS Protein Family Member 1                                    | 44.20  | 35.63  | 23.85 | 2.55  | -0.04 | 9.74E-01 | -2.44  | 1.72E-03 | -1.10 | 4.24E-01 | M-1 |
| ENSMMUG00000007010  | LOC700544 | Coiled-coil Domain-containing Protein 162-like                 | 0.96   | 0.63   | 0.01  | 0.07  | -0.44 | 8.59E-01 | -7.50  | 2.65E-05 | 3.11  | 2.75E-01 | M-1 |
| ENSMMUG00000018231  | ARMC2     | Armadillo Repeat Containing 2                                  | 12.43  | 6.39   | 1.28  | 0.69  | -1.28 | 2.24E-01 | -2.54  | 6.41E-03 | -0.91 | 6.30E-01 | M-1 |

|                    |           |                                                     |        |        |        |        |       |          |       |          |       |          |     |
|--------------------|-----------|-----------------------------------------------------|--------|--------|--------|--------|-------|----------|-------|----------|-------|----------|-----|
| ENSMMUG00000015341 | ERMARD    | ER Membrane Associated RNA Degradation              | 1.08   | 2.50   | 1.28   | 0.90   | 1.37  | 1.14E-01 | -1.88 | 2.04E-02 | 1.50  | 2.12E-01 | M-1 |
| ENSMMUG00000021145 | FAM120B   | Family With Sequence Similarity 120B                | 65.46  | 41.50  | 4.06   | 2.90   | -0.62 | 4.43E-01 | -4.12 | 3.07E-11 | 0.50  | 7.37E-01 | M-1 |
| ENSMMUG00000019483 |           |                                                     | 5.26   | 2.58   | 0.18   | 0.05   | -1.53 | 3.87E-01 | -4.89 | 1.80E-03 | -0.09 | 9.89E-01 | M-1 |
| ENSMMUG00000008530 |           |                                                     | 1.21   | 2.27   | 0.80   | 0.18   | -0.10 | 9.53E-01 | -2.77 | 1.16E-02 | -1.74 | 3.24E-01 | M-1 |
| ENSMMUG00000008395 | LOC720574 | Golgin Subfamily A Member 8C-like                   | 2.14   | 1.28   | 0.14   | 0.05   | -2.22 | 1.24E-01 | -3.33 | 2.56E-02 | -1.42 | 6.61E-01 | M-1 |
| ENSMMUG00000012553 | LOC695266 | Putative Golgin Subfamily A Member 8D               | 2.67   | 1.65   | 0.36   | 0.03   | -2.27 | 1.17E-01 | -3.43 | 1.84E-02 | -1.39 | 6.53E-01 | M-1 |
| ENSMMUG00000021656 | LOC720095 | Golgin Subfamily A Member 8M-like                   | 2.32   | 1.90   | 0.34   | 0.09   | -1.77 | 1.65E-01 | -3.03 | 1.94E-02 | -1.20 | 6.82E-01 | M-1 |
| ENSMMUG00000001811 | FMN1      | Formin 1                                            | 52.14  | 80.77  | 17.00  | 2.35   | 0.67  | 5.30E-01 | -3.91 | 1.13E-06 | -1.55 | 2.27E-01 | M-1 |
| ENSMMUG00000029785 |           |                                                     | 0.68   | 2.50   | 0.12   | 0.07   | 0.46  | 8.72E-01 | -6.60 | 7.55E-04 | -0.31 | 9.68E-01 | M-1 |
| ENSMMUG00000005270 | RYR3      | Ryanodine Receptor 3                                | 4.00   | 1.99   | 0.17   | 0.11   | -1.75 | 7.22E-02 | -3.54 | 6.53E-05 | -0.98 | 5.84E-01 | M-1 |
| ENSMMUG00000046486 | ZNF770    | Zinc Finger Protein 770                             | 9.10   | 14.98  | 9.17   | 9.83   | 0.94  | 1.55E-01 | -1.44 | 1.73E-02 | 0.91  | 3.57E-01 | M-1 |
| ENSMMUG00000006840 | MEIS2     | Meis Homeobox 2                                     | 1.84   | 1.36   | 0.37   | 0.22   | -0.90 | 5.94E-01 | -4.90 | 1.52E-04 | 1.75  | 4.50E-01 | M-1 |
| ENSMMUG00000018333 | RASGRP1   | RAS Guanyl Releasing Protein 1                      | 9.81   | 5.44   | 0.50   | 1.62   | -0.57 | 5.92E-01 | -4.33 | 5.31E-08 | 1.42  | 2.86E-01 | M-1 |
| ENSMMUG00000006035 | THBS1     | Thrombospondin 1                                    | 8.19   | 2.06   | 0.34   | 0.11   | -1.87 | 1.02E-01 | -4.31 | 6.26E-05 | -0.38 | 9.11E-01 | M-1 |
| ENSMMUG00000006038 | FSIP1     | Fibrous Sheath Interacting Protein 1                | 1.92   | 1.01   | 0.33   | 0.47   | -0.13 | 9.48E-01 | -3.16 | 1.59E-02 | 1.97  | 3.54E-01 | M-1 |
| ENSMMUG00000016686 |           |                                                     | 155.06 | 96.79  | 14.66  | 16.90  | -1.03 | 1.65E-01 | -2.68 | 2.90E-05 | 0.23  | 9.06E-01 | M-1 |
| ENSMMUG00000014462 | KNSTRN    | Kinetochores Localized Astrin/SPAG5 Binding Protein | 7.96   | 4.69   | 2.53   | 2.53   | -0.57 | 4.23E-01 | -1.54 | 9.04E-03 | 0.41  | 7.64E-01 | M-1 |
| ENSMMUG00000000306 | RMDN3     | Regulator Of Microtubule Dynamics 3                 | 38.74  | 20.11  | 4.73   | 7.49   | -1.04 | 4.11E-01 | -2.52 | 1.88E-02 | 1.35  | 4.73E-01 | M-1 |
| ENSMMUG00000008093 | STARD9    | StAR Related Lipid Transfer Domain Containing 9     | 5.09   | 3.86   | 0.52   | 0.14   | -0.85 | 4.89E-01 | -4.68 | 7.34E-07 | 0.24  | 9.44E-01 | M-1 |
| ENSMMUG00000022255 | EPB42     | Erythrocyte Membrane Protein Band 4.2               | 7.58   | 4.17   | 0.29   | 0.06   | -1.56 | 2.86E-01 | -6.07 | 2.88E-06 | -0.81 | 8.03E-01 | M-1 |
| ENSMMUG00000022773 |           |                                                     | 236.45 | 151.81 | 83.18  | 27.98  | -0.42 | 5.12E-01 | -1.13 | 3.50E-02 | -1.22 | 8.58E-02 | M-1 |
| ENSMMUG00000022774 | WDR76     | WD Repeat Domain 76                                 | 148.65 | 133.60 | 10.18  | 5.90   | -0.50 | 6.76E-01 | -3.72 | 1.24E-05 | -0.36 | 8.86E-01 | M-1 |
| ENSMMUG00000005856 | GATM      | Glycine Amidinotransferase                          | 59.10  | 27.43  | 1.46   | 0.44   | -1.31 | 2.06E-01 | -4.45 | 3.39E-07 | -0.93 | 6.12E-01 | M-1 |
| ENSMMUG00000015749 | SQOR      | Sulfide Quinone Oxidoreductase                      | 10.06  | 2.09   | 0.24   | 0.33   | -2.43 | 5.66E-02 | -3.19 | 1.16E-02 | 0.59  | 8.58E-01 | M-1 |
| ENSMMUG00000018834 | MYEF2     | Myelin Expression Factor 2                          | 11.05  | 5.17   | 2.27   | 1.11   | -1.04 | 3.42E-01 | -2.20 | 2.21E-02 | 1.28  | 4.51E-01 | M-1 |
| ENSMMUG0000004239  | FBN1      | Fibrillin 1                                         | 1.10   | 0.97   | 0.08   | 0.05   | -0.16 | 9.15E-01 | -3.48 | 2.51E-04 | -0.77 | 7.32E-01 | M-1 |
| ENSMMUG00000009829 | CEP152    | Centrosomal Protein 152                             | 17.03  | 29.47  | 8.28   | 4.26   | 0.46  | 5.39E-01 | -1.67 | 4.76E-03 | -0.85 | 4.01E-01 | M-1 |
| ENSMMUG00000009833 | SHC4      | SHC Adaptor Protein 4                               | 26.32  | 24.97  | 4.02   | 0.21   | -0.53 | 7.32E-01 | -5.68 | 9.92E-08 | -0.72 | 7.91E-01 | M-1 |
| ENSMMUG00000003684 | ATP8B4    | ATPase Phospholipid Transporting 8B4 (putative)     | 3.36   | 2.80   | 1.10   | 0.16   | -1.88 | 2.58E-01 | -3.78 | 1.28E-02 | -2.03 | 4.31E-01 | M-1 |
| ENSMMUG00000002877 | HDC       | Histidine Decarboxylase                             | 2.72   | 0.65   | 0.18   | 0.16   | -2.66 | 1.24E-01 | -4.14 | 1.39E-02 | -1.17 | 7.61E-01 | M-1 |
| ENSMMUG00000008574 | USP50     | Ubiquitin Specific Peptidase 50                     | 2.57   | 1.76   | 0.07   | 0.12   | -2.43 | 2.56E-01 | -5.10 | 1.44E-02 | 1.93  | 6.39E-01 | M-1 |
| ENSMMUG00000005976 | GLDN      | Gliomedin                                           | 6.16   | 7.47   | 0.42   | 0.01   | -1.02 | 4.68E-01 | -4.78 | 2.62E-05 | -2.63 | 1.79E-01 | M-1 |
| ENSMMUG00000029652 | MAPK6     | Mitogen-activated Protein Kinase 6                  | 128.88 | 122.52 | 58.01  | 28.28  | -0.14 | 8.67E-01 | -1.54 | 3.76E-03 | -0.64 | 5.10E-01 | M-1 |
| ENSMMUG00000017372 | BCL2L10   | BCL2 Like 10                                        | 685.76 | 400.83 | 90.91  | 4.13   | -1.36 | 2.05E-01 | -3.85 | 2.63E-05 | -1.36 | 4.07E-01 | M-1 |
| ENSMMUG00000003653 | PRTG      | Protogenin                                          | 3.17   | 3.47   | 0.65   | 0.50   | -0.54 | 7.48E-01 | -3.13 | 1.11E-02 | -0.72 | 8.08E-01 | M-1 |
| ENSMMUG00000017801 | RFX7      | Regulatory Factor X7                                | 21.08  | 32.97  | 2.12   | 0.36   | 0.40  | 7.93E-01 | -4.75 | 3.15E-06 | -1.40 | 4.63E-01 | M-1 |
| ENSMMUG00000019484 | TEX9      | Testis Expressed 9                                  | 2.01   | 1.01   | 0.70   | 0.27   | -0.89 | 4.81E-01 | -2.16 | 4.79E-02 | -0.45 | 8.75E-01 | M-1 |
| ENSMMUG00000005179 |           |                                                     | 37.62  | 16.93  | 7.31   | 6.94   | -1.02 | 1.79E-01 | -1.68 | 1.45E-02 | 0.00  | 9.99E-01 | M-1 |
| ENSMMUG00000012690 | MYZAP     | Myocardial Zonula Adherens Protein                  | 9.84   | 7.02   | 3.59   | 1.88   | -0.45 | 6.15E-01 | -1.53 | 2.97E-02 | -0.30 | 8.74E-01 | M-1 |
| ENSMMUG00000019504 | ALDH1A2   | Aldehyde Dehydrogenase 1 Family Member A2           | 9.25   | 5.25   | 0.64   | 0.04   | -0.53 | 7.62E-01 | -6.88 | 2.01E-08 | -0.04 | 9.94E-01 | M-1 |
| ENSMMUG00000013089 | RNF111    | Ring Finger Protein 111                             | 108.46 | 93.10  | 17.48  | 7.87   | -0.28 | 7.97E-01 | -3.05 | 2.74E-05 | -0.15 | 9.58E-01 | M-1 |
| ENSMMUG00000016390 | FAM81A    | Family With Sequence Similarity 81 Member A         | 13.53  | 4.51   | 3.37   | 0.90   | -1.01 | 4.75E-01 | -3.20 | 5.64E-03 | 0.61  | 8.37E-01 | M-1 |
| ENSMMUG00000012000 | ANXA2     | Annexin A2                                          | 141.53 | 392.42 | 135.80 | 563.30 | 0.78  | 3.08E-01 | -1.60 | 1.69E-02 | 1.46  | 1.13E-01 | M-1 |
| ENSMMUG00000011503 | TLN2      | Talin 2                                             | 19.72  | 9.20   | 1.71   | 4.51   | -1.03 | 2.94E-01 | -2.80 | 7.71E-04 | 1.78  | 1.48E-01 | M-1 |

|                    |              |                                                                            |       |       |       |       |       |          |       |          |       |          |     |
|--------------------|--------------|----------------------------------------------------------------------------|-------|-------|-------|-------|-------|----------|-------|----------|-------|----------|-----|
| ENSMMUG0000001587  | TPM1         | Tropomyosin 1                                                              | 36.66 | 14.28 | 4.13  | 10.10 | -1.39 | 1.06E-01 | -1.81 | 2.49E-02 | 1.39  | 2.53E-01 | M-1 |
| ENSMMUG00000013460 | RAB8B        | RAB8B, Member RAS Oncogene Family                                          | 21.53 | 36.64 | 8.11  | 3.96  | 0.69  | 4.75E-01 | -1.89 | 1.92E-02 | -1.97 | 6.71E-02 | M-1 |
| ENSMMUG00000012114 | USP3         | Ubiquitin Specific Peptidase 3                                             | 37.59 | 36.40 | 7.60  | 6.04  | -0.18 | 8.90E-01 | -3.62 | 7.77E-06 | 1.10  | 4.68E-01 | M-1 |
| ENSMMUG00000012117 | HERC1        | HECT And RLD Domain Containing E3 Ubiquitin Protein Ligase Family Member 1 | 4.25  | 3.23  | 2.19  | 3.99  | 0.09  | 9.03E-01 | -1.13 | 1.99E-02 | 0.76  | 3.17E-01 | M-1 |
| ENSMMUG00000015455 | SMAD3        | SMAD Family Member 3                                                       | 15.21 | 45.34 | 4.57  | 4.95  | 0.65  | 7.06E-01 | -3.56 | 5.32E-03 | 2.44  | 2.03E-01 | M-1 |
| ENSMMUG00000021364 | GLCE         | Glucuronic Acid Epimerase                                                  | 20.97 | 16.10 | 3.16  | 6.16  | -0.63 | 6.12E-01 | -2.37 | 1.56E-02 | 1.17  | 5.07E-01 | M-1 |
| ENSMMUG00000045257 | LOC100427840 | Putative Golgin Subfamily A Member 6C                                      | 12.79 | 7.30  | 0.84  | 0.76  | -1.75 | 1.35E-01 | -3.96 | 1.70E-04 | 0.63  | 8.12E-01 | M-1 |
| ENSMMUG00000002569 | PML          | Promyelocytic Leukemia                                                     | 0.46  | 1.88  | 0.42  | 0.35  | 2.25  | 1.03E-01 | -2.60 | 4.98E-02 | 0.47  | 8.99E-01 | M-1 |
| ENSMMUG00000011309 | ADPGK        | ADP Dependent Glucokinase                                                  | 22.84 | 17.89 | 5.68  | 3.84  | -0.49 | 6.17E-01 | -1.83 | 1.77E-02 | 0.25  | 9.12E-01 | M-1 |
| ENSMMUG00000013685 | BBS4         | Bardet-Biedl Syndrome 4                                                    | 35.32 | 21.30 | 5.89  | 1.38  | -0.20 | 9.00E-01 | -3.50 | 3.06E-04 | -0.52 | 8.38E-01 | M-1 |
| ENSMMUG00000043428 |              |                                                                            | 43.69 | 38.93 | 18.66 | 13.13 | -0.01 | 9.91E-01 | -1.98 | 1.04E-03 | 0.31  | 8.49E-01 | M-1 |
| ENSMMUG00000022733 | LOC715898    | Putative Golgin Subfamily A Member 6C                                      | 53.15 | 14.22 | 2.53  | 0.31  | -1.64 | 1.56E-01 | -4.26 | 2.63E-05 | -0.78 | 7.53E-01 | M-1 |
| ENSMMUG00000009281 | SIN3A        | SIN3 Transcription Regulator Family Member A                               | 80.81 | 83.87 | 21.69 | 14.62 | -0.01 | 9.95E-01 | -2.10 | 2.73E-05 | -0.51 | 6.25E-01 | M-1 |
| ENSMMUG00000003783 | PTPN9        | Protein Tyrosine Phosphatase, Non-receptor Type 9                          | 25.69 | 12.17 | 2.93  | 3.80  | -0.98 | 2.02E-01 | -2.26 | 7.00E-04 | 0.34  | 8.45E-01 | M-1 |
| ENSMMUG00000020882 | NRG4         | Neuregulin 4                                                               | 18.57 | 8.60  | 2.02  | 0.75  | -1.53 | 3.43E-01 | -3.80 | 7.29E-03 | -0.60 | 8.82E-01 | M-1 |
| ENSMMUG00000011047 | SCAPER       | S-phase Cyclin A Associated Protein In The ER                              | 12.31 | 11.37 | 3.57  | 3.03  | -0.02 | 9.82E-01 | -2.00 | 9.82E-04 | -0.06 | 9.78E-01 | M-1 |
| ENSMMUG00000043684 | LOC106995855 | Putative Golgin Subfamily A Member 6B                                      | 19.87 | 5.52  | 5.88  | 0.45  | -1.96 | 1.34E-01 | -4.82 | 3.50E-05 | 0.98  | 7.06E-01 | M-1 |
| ENSMMUG00000000534 | KIAA1024     | KIAA1024 Ortholog                                                          | 6.31  | 2.90  | 0.07  | 0.06  | -1.18 | 3.92E-01 | -4.49 | 1.22E-04 | -1.18 | 6.56E-01 | M-1 |
| ENSMMUG00000011555 | IL16         | Interleukin 16                                                             | 2.11  | 2.23  | 0.20  | 0.18  | -0.37 | 8.41E-01 | -5.11 | 2.61E-05 | 0.38  | 9.20E-01 | M-1 |
| ENSMMUG00000011326 |              |                                                                            | 5.77  | 14.11 | 1.12  | 1.68  | 1.11  | 4.79E-01 | -4.78 | 1.31E-04 | 2.53  | 1.86E-01 | M-1 |
| ENSMMUG00000010432 | ZNF592       | Zinc Finger Protein 592                                                    | 30.14 | 24.25 | 5.53  | 3.96  | -0.59 | 5.66E-01 | -2.69 | 7.41E-04 | 0.13  | 9.66E-01 | M-1 |
| ENSMMUG00000001254 | TICRR        | TOPBP1 Interacting Checkpoint And Replication Regulator                    | 58.91 | 43.41 | 11.16 | 11.92 | -0.60 | 4.53E-01 | -1.48 | 2.92E-02 | -0.42 | 7.90E-01 | M-1 |
| ENSMMUG00000023816 | SEMA4B       | Semaphorin 4B                                                              | 19.75 | 15.01 | 5.02  | 4.84  | -0.10 | 9.51E-01 | -2.63 | 9.33E-03 | 0.62  | 8.03E-01 | M-1 |
| ENSMMUG00000020107 |              |                                                                            | 1.44  | 6.36  | 0.15  | 0.25  | 1.98  | 5.51E-01 | -9.22 | 6.64E-04 | 2.81  | 6.05E-01 | M-1 |
| ENSMMUG00000008886 | CRTC3        | CREB Regulated Transcription Coactivator 3                                 | 14.24 | 9.36  | 1.67  | 1.73  | -0.98 | 4.20E-01 | -3.12 | 1.76E-03 | 0.05  | 9.88E-01 | M-1 |
| ENSMMUG00000005109 | PRC1         | Protein Regulator Of Cytokinesis 1                                         | 98.66 | 60.86 | 29.79 | 18.77 | -0.54 | 3.68E-01 | -1.71 | 4.68E-04 | 0.16  | 9.16E-01 | M-1 |
| ENSMMUG00000001740 | SLCO3A1      | Solute Carrier Organic Anion Transporter Family Member 3A1                 | 7.76  | 2.21  | 0.14  | 0.07  | -1.74 | 1.69E-01 | -3.39 | 4.38E-03 | -1.64 | 4.73E-01 | M-1 |
| ENSMMUG00000017381 | RGMA         | Repulsive Guidance Molecule Family Member A                                | 3.10  | 3.14  | 0.12  | 0.02  | 0.27  | 9.01E-01 | -5.35 | 7.88E-05 | -1.45 | 6.15E-01 | M-1 |
| ENSMMUG00000040931 |              |                                                                            | 18.89 | 6.15  | 0.64  | 0.79  | -1.22 | 3.51E-01 | -6.98 | 7.07E-08 | 2.99  | 1.06E-01 | M-1 |
| ENSMMUG00000004787 | MCTP2        | Multiple C2 And Transmembrane Domain Containing 2                          | 6.23  | 3.37  | 0.90  | 1.00  | -0.49 | 6.76E-01 | -3.29 | 1.02E-04 | 1.21  | 4.31E-01 | M-1 |
| ENSMMUG00000046172 |              |                                                                            | 22.96 | 20.21 | 4.01  | 1.94  | -0.24 | 8.37E-01 | -2.55 | 1.38E-03 | -0.86 | 5.91E-01 | M-1 |
| ENSMMUG00000012305 | IGF1R        | Insulin Like Growth Factor 1 Receptor                                      | 26.06 | 10.28 | 3.78  | 1.87  | -1.40 | 8.20E-02 | -2.07 | 5.87E-03 | -1.19 | 3.26E-01 | M-1 |
| ENSMMUG00000005224 | TTC23        | Tetratricopeptide Repeat Domain 23                                         | 1.48  | 1.86  | 0.28  | 1.57  | 1.16  | 2.59E-01 | -3.50 | 7.20E-05 | 1.97  | 1.29E-01 | M-1 |
| ENSMMUG00000021160 | ADAMTS17     | ADAM Metallopeptidase With Thrombospondin Type 1 Motif 17                  | 1.50  | 3.77  | 0.29  | 0.04  | 1.65  | 2.15E-01 | -4.05 | 5.54E-04 | -1.77 | 4.23E-01 | M-1 |
| ENSMMUG00000016503 | LINS1        | Lines Homolog 1                                                            | 11.68 | 6.24  | 2.24  | 1.84  | -1.10 | 2.85E-01 | -2.26 | 1.25E-02 | 0.13  | 9.68E-01 | M-1 |
| ENSMMUG00000000278 | TARSL2       | Threonyl-tRNA Synthetase Like 2                                            | 1.57  | 0.65  | 0.20  | 0.07  | -1.44 | 2.15E-01 | -3.81 | 4.65E-04 | 0.12  | 9.76E-01 | M-1 |

|                     |            |                                                       |        |        |        |       |       |          |        |          |       |          |     |
|---------------------|------------|-------------------------------------------------------|--------|--------|--------|-------|-------|----------|--------|----------|-------|----------|-----|
| ENSMMUG00000019126  | PNP        | Purine Nucleoside Phosphorylase                       | 5.52   | 8.72   | 0.96   | 1.55  | -0.95 | 5.94E-01 | -4.43  | 2.40E-03 | 2.24  | 3.63E-01 | M-1 |
| ENSMMUG00000005496  | RNASE4     | Ribonuclease, RNase A Family, 4                       | 1.84   | 1.47   | 0.03   | 0.36  | -1.29 | 5.88E-01 | -4.61  | 2.05E-02 | 4.92  | 6.63E-02 | M-1 |
| ENSMMUG000000040922 |            |                                                       | 2.05   | 2.77   | 1.21   | 1.65  | 0.57  | 5.75E-01 | -1.87  | 2.47E-02 | 1.25  | 3.51E-01 | M-1 |
| ENSMMUG00000015002  | CHD8       | Chromodomain Helicase DNA Binding Protein 8           | 27.58  | 50.32  | 21.40  | 13.71 | 0.84  | 7.46E-02 | -1.29  | 3.30E-03 | -0.56 | 4.80E-01 | M-1 |
| ENSMMUG00000015004  | TOX4       | TOX High Mobility Group Box Family Member 4           | 57.91  | 78.18  | 33.86  | 13.32 | 0.37  | 6.49E-01 | -1.89  | 1.84E-03 | -0.45 | 7.51E-01 | M-1 |
| ENSMMUG00000014997  | METTL3     | Methyltransferase Like 3                              | 25.16  | 29.62  | 2.79   | 5.01  | 0.07  | 9.50E-01 | -3.30  | 3.84E-07 | 0.29  | 8.78E-01 | M-1 |
| ENSMMUG00000008477  | C7H14orf93 | Chromosome 7 Open Reading Frame, Human C14orf93       | 0.84   | 2.94   | 0.27   | 0.53  | 2.58  | 1.91E-01 | -4.49  | 1.18E-02 | 3.10  | 2.59E-01 | M-1 |
| ENSMMUG00000012474  | RNF31      | Ring Finger Protein 31                                | 12.70  | 10.72  | 2.96   | 5.08  | -0.75 | 4.12E-01 | -1.59  | 4.57E-02 | 0.32  | 8.78E-01 | M-1 |
| ENSMMUG00000011514  | COCH       | Cochlin                                               | 2.07   | 7.01   | 0.43   | 0.12  | 1.09  | 6.04E-01 | -4.93  | 2.54E-03 | 0.05  | 9.94E-01 | M-1 |
| ENSMMUG00000015128  | AKAP6      | A-kinase Anchoring Protein 6                          | 13.85  | 9.70   | 0.70   | 0.81  | -1.40 | 1.15E-01 | -3.97  | 2.96E-07 | -0.11 | 9.72E-01 | M-1 |
| ENSMMUG000000042622 |            |                                                       | 5.77   | 11.58  | 2.60   | 2.48  | 0.54  | 6.63E-01 | -2.03  | 3.84E-02 | -0.16 | 9.64E-01 | M-1 |
| ENSMMUG00000017678  | KLHL28     | Kelch Like Family Member 28                           | 11.90  | 7.18   | 2.84   | 2.05  | -0.64 | 5.14E-01 | -1.84  | 2.07E-02 | 0.21  | 9.36E-01 | M-1 |
| ENSMMUG00000003914  | KLHDC1     | Kelch Domain Containing 1                             | 4.77   | 4.88   | 0.09   | 0.04  | -0.34 | 8.90E-01 | -5.96  | 1.48E-04 | 0.45  | 9.32E-01 | M-1 |
| ENSMMUG00000018274  | FRMD6      | FERM Domain Containing 6                              | 19.36  | 21.80  | 8.96   | 15.78 | -0.10 | 9.41E-01 | -2.00  | 2.20E-02 | 1.48  | 2.64E-01 | M-1 |
| ENSMMUG00000010392  | GNG2       | G Protein Subunit Gamma 2                             | 2.33   | 8.34   | 0.07   | 0.12  | 0.00  | 1.00E+00 | -8.56  | 2.30E-05 | 3.19  | 3.81E-01 | M-1 |
| ENSMMUG000000042865 |            |                                                       | 0.64   | 0.47   | 0.11   | 0.00  | -1.97 | 7.37E-01 | -17.08 | 4.10E-05 | -0.04 | 9.98E-01 | M-1 |
| ENSMMUG00000000429  | BMP4       | Bone Morphogenetic Protein 4                          | 7.56   | 20.05  | 0.35   | 0.76  | 1.71  | 1.79E-01 | -5.56  | 3.52E-07 | 1.53  | 4.54E-01 | M-1 |
| ENSMMUG000000021757 | PELI2      | Pellino E3 Ubiquitin Protein Ligase Family Member 2   | 1.75   | 1.58   | 0.39   | 0.23  | -0.46 | 8.36E-01 | -4.15  | 9.37E-03 | -1.18 | 7.38E-01 | M-1 |
| ENSMMUG000000038006 | OTX2       | Orthodenticle Homeobox 2                              | 419.85 | #####  | 108.99 | 11.42 | 1.08  | 2.82E-01 | -4.64  | 1.46E-08 | -1.43 | 2.99E-01 | M-1 |
| ENSMMUG000000021311 | NAA30      | N(alpha)-acetyltransferase 30, NatC Catalytic Subunit | 125.53 | 84.36  | 10.04  | 8.38  | -0.58 | 6.01E-01 | -3.22  | 9.75E-05 | 0.08  | 9.79E-01 | M-1 |
| ENSMMUG00000003514  | ARID4A     | AT-rich Interaction Domain 4A                         | 5.37   | 8.08   | 3.72   | 4.48  | 0.58  | 3.77E-01 | -1.15  | 4.46E-02 | 0.55  | 6.17E-01 | M-1 |
| ENSMMUG00000001084  | KIAA0586   | KIAA0586 Ortholog                                     | 12.77  | 6.37   | 2.91   | 3.50  | -0.77 | 3.31E-01 | -1.47  | 3.51E-02 | 0.55  | 7.10E-01 | M-1 |
| ENSMMUG000000022839 | ESR2       | Estrogen Receptor 2                                   | 27.44  | 17.24  | 1.86   | 0.28  | -1.53 | 2.25E-01 | -4.65  | 1.43E-05 | -1.64 | 3.91E-01 | M-1 |
| ENSMMUG000000019172 | SPTB       | Spectrin Beta, Erythrocytic                           | 3.49   | 2.43   | 0.47   | 1.14  | -0.59 | 6.67E-01 | -4.16  | 3.81E-05 | 1.63  | 3.33E-01 | M-1 |
| ENSMMUG000000004339 | RAB15      | RAB15, Member RAS Oncogene Family                     | 25.58  | 29.29  | 2.31   | 0.67  | -0.42 | 7.70E-01 | -4.30  | 1.32E-05 | -1.08 | 5.93E-01 | M-1 |
| ENSMMUG00000013848  | FUT8       | Fucosyltransferase 8                                  | 33.00  | 31.96  | 4.99   | 10.12 | -0.03 | 9.82E-01 | -2.91  | 3.03E-04 | 1.26  | 3.56E-01 | M-1 |
| ENSMMUG00000015865  | ARG2       | Arginase 2                                            | 141.40 | 142.79 | 15.24  | 3.74  | -0.33 | 7.20E-01 | -3.52  | 2.08E-08 | -1.72 | 5.11E-02 | M-1 |
| ENSMMUG00000019346  | DCAF5      | DDB1 And CUL4 Associated Factor 5                     | 37.12  | 25.00  | 1.75   | 11.41 | -1.28 | 2.09E-01 | -3.56  | 3.96E-05 | 2.23  | 6.67E-02 | M-1 |
| ENSMMUG000000012136 | CCDC177    | Coiled-coil Domain Containing 177                     | 4.54   | 2.52   | 0.06   | 0.02  | -1.51 | 3.24E-01 | -5.48  | 2.98E-05 | -1.28 | 6.75E-01 | M-1 |
| ENSMMUG000000020067 | SIPA1L1    | Signal Induced Proliferation Associated 1 Like 1      | 110.23 | 68.31  | 5.85   | 3.30  | -0.92 | 3.16E-01 | -4.53  | 7.56E-10 | 0.23  | 9.26E-01 | M-1 |
| ENSMMUG000000010173 | PSEN1      | Presenilin 1                                          | 47.28  | 44.14  | 9.38   | 8.44  | 0.02  | 9.83E-01 | -2.47  | 7.40E-07 | -0.14 | 9.36E-01 | M-1 |
| ENSMMUG000000020195 | PAPLN      | Papilin, Proteoglycan Like Sulfated Glycoprotein      | 1.72   | 1.05   | 0.05   | 0.04  | -2.03 | 2.58E-01 | -4.25  | 1.17E-02 | -1.84 | 5.82E-01 | M-1 |
| ENSMMUG000000004913 | ELMSAN1    | ELM2 And Myb/SANT Domain Containing 1                 | 12.11  | 16.68  | 3.04   | 3.21  | 0.36  | 7.27E-01 | -2.08  | 4.80E-03 | -0.22 | 9.20E-01 | M-1 |
| ENSMMUG000000011147 | FAM161B    | Family With Sequence Similarity 161 Member B          | 5.51   | 3.57   | 0.62   | 0.23  | -1.61 | 2.62E-01 | -3.23  | 1.23E-02 | -1.57 | 5.00E-01 | M-1 |
| ENSMMUG000000012684 | ALDH6A1    | Aldehyde Dehydrogenase 6 Family Member A1             | 11.37  | 27.89  | 16.29  | 16.17 | 1.04  | 1.76E-01 | -1.56  | 2.76E-02 | 0.27  | 8.92E-01 | M-1 |
| ENSMMUG000000004260 | DLST       | Dihydroliipoamide S-succinyltransferase               | 153.53 | 102.42 | 33.40  | 17.93 | -0.81 | 2.24E-01 | -2.35  | 3.12E-05 | -0.57 | 6.32E-01 | M-1 |
| ENSMMUG00000001092  | TMEM63C    | Transmembrane Protein 63C                             | 1.60   | 3.32   | 0.05   | 0.04  | -1.07 | 5.54E-01 | -3.58  | 1.81E-02 | -2.60 | 2.66E-01 | M-1 |

|                     |          |                                                                                   |        |        |       |       |       |          |       |          |       |          |     |
|---------------------|----------|-----------------------------------------------------------------------------------|--------|--------|-------|-------|-------|----------|-------|----------|-------|----------|-----|
| ENSMMUG00000013551  | VIPAS39  | VPS33B Interacting Protein, Apical-basolateral Polarity Regulator, Spe-39 Homolog | 40.92  | 56.44  | 9.86  | 8.49  | 0.15  | 8.96E-01 | -2.65 | 2.36E-04 | -0.08 | 9.77E-01 | M-1 |
| ENSMMUG00000005402  | SNW1     | SNW Domain Containing 1                                                           | 300.89 | 184.32 | 57.83 | 38.73 | -0.72 | 2.42E-01 | -1.73 | 1.04E-03 | -0.51 | 6.39E-01 | M-1 |
| ENSMMUG00000013842  | NRXN3    | Neurexin 3                                                                        | 2.12   | 2.45   | 0.31  | 0.05  | 0.06  | 9.71E-01 | -3.10 | 4.10E-03 | -2.41 | 1.41E-01 | M-1 |
| ENSMMUG00000019710  | CEP128   | Centrosomal Protein 128                                                           | 23.08  | 39.46  | 14.62 | 10.88 | 0.71  | 5.19E-02 | -1.68 | 2.78E-07 | -0.35 | 6.14E-01 | M-1 |
| ENSMMUG00000009575  | PTPN21   | Protein Tyrosine Phosphatase, Non-receptor Type 21                                | 14.37  | 7.37   | 2.41  | 4.02  | -0.93 | 2.07E-01 | -1.66 | 1.17E-02 | 0.94  | 3.98E-01 | M-1 |
| ENSMMUG00000004606  | EML5     | Echinoderm Microtubule Associated Protein Like 5                                  | 3.57   | 4.30   | 1.11  | 1.05  | -0.01 | 9.96E-01 | -2.75 | 2.42E-03 | 0.42  | 8.63E-01 | M-1 |
| ENSMMUG00000004460  | TDP1     | Tyrosyl-DNA Phosphodiesterase 1                                                   | 49.92  | 14.89  | 8.91  | 2.32  | -1.61 | 5.63E-02 | -2.29 | 3.82E-03 | -0.29 | 9.00E-01 | M-1 |
| ENSMMUG000000048425 | CALM1    | Calmodulin 1                                                                      | 86.18  | 61.26  | 41.84 | 53.66 | -0.42 | 5.43E-01 | -1.22 | 2.83E-02 | 1.06  | 1.91E-01 | M-1 |
| ENSMMUG000000020687 | CCDC88C  | Coiled-coil Domain Containing 88C                                                 | 9.95   | 2.70   | 0.86  | 1.65  | -1.60 | 8.97E-02 | -2.78 | 1.26E-03 | 1.58  | 2.39E-01 | M-1 |
| ENSMMUG000000011745 | TC2N     | Tandem C2 Domains, Nuclear                                                        | 28.86  | 13.27  | 4.80  | 8.18  | -0.67 | 5.49E-01 | -1.92 | 3.70E-02 | -0.09 | 9.77E-01 | M-1 |
| ENSMMUG00000008447  | FBLN5    | Fibulin 5                                                                         | 7.22   | 2.75   | 0.26  | 0.10  | -0.98 | 4.60E-01 | -5.00 | 2.80E-06 | -0.64 | 8.20E-01 | M-1 |
| ENSMMUG000000029233 | RIN3     | Ras And Rab Interactor 3                                                          | 3.07   | 1.21   | 0.10  | 0.36  | -2.12 | 1.54E-01 | -3.56 | 1.01E-02 | 1.65  | 5.14E-01 | M-1 |
| ENSMMUG000000012400 | ASB2     | Ankyrin Repeat And SOCS Box Containing 2                                          | 1.59   | 0.59   | 0.17  | 0.27  | -0.82 | 7.04E-01 | -3.44 | 4.22E-02 | 1.17  | 7.52E-01 | M-1 |
| ENSMMUG000000021295 | PPP4R4   | Protein Phosphatase 4 Regulatory Subunit 4                                        | 29.97  | 19.05  | 1.95  | 1.17  | -0.45 | 6.52E-01 | -4.02 | 1.70E-08 | -1.60 | 1.47E-01 | M-1 |
| ENSMMUG000000015838 | TCL1B    | T-cell Leukemia/lymphoma 1B                                                       | 127.53 | 39.39  | 5.37  | 6.23  | -2.01 | 7.34E-02 | -3.29 | 1.86E-03 | 0.33  | 9.20E-01 | M-1 |
| ENSMMUG000000015839 |          |                                                                                   | 125.71 | 51.14  | 1.68  | 1.39  | -2.08 | 1.43E-01 | -4.31 | 8.53E-04 | -0.49 | 9.02E-01 | M-1 |
| ENSMMUG000000001201 | CCNK     | Cyclin K                                                                          | 34.25  | 52.57  | 25.82 | 18.39 | 0.61  | 1.59E-01 | -1.16 | 2.39E-03 | -0.23 | 8.12E-01 | M-1 |
| ENSMMUG000000048658 |          |                                                                                   | 21.81  | 17.51  | 1.83  | 0.14  | -1.90 | 3.85E-01 | -7.40 | 1.87E-04 | 0.53  | 9.38E-01 | M-1 |
| ENSMMUG000000007135 | WDR20    | WD Repeat Domain 20                                                               | 63.63  | 58.84  | 10.09 | 3.02  | -0.09 | 9.41E-01 | -4.11 | 5.96E-09 | 0.19  | 9.40E-01 | M-1 |
| ENSMMUG000000003484 | TECPR2   | Tectonin Beta-propeller Repeat Containing 2                                       | 2.24   | 4.71   | 0.80  | 1.04  | 0.89  | 4.36E-01 | -2.65 | 4.80E-03 | -0.24 | 9.38E-01 | M-1 |
| ENSMMUG000000008380 | CDC42BPB | CDC42 Binding Protein Kinase Beta                                                 | 38.50  | 28.92  | 12.21 | 14.57 | -0.41 | 7.19E-01 | -2.13 | 1.16E-02 | 0.75  | 6.69E-01 | M-1 |
| ENSMMUG000000018123 | PPP1R13B | Protein Phosphatase 1 Regulatory Subunit 13B                                      | 79.72  | 63.73  | 12.34 | 5.56  | -0.42 | 5.08E-01 | -2.85 | 2.15E-09 | -0.84 | 2.98E-01 | M-1 |
| ENSMMUG000000006243 | TDRD9    | Tudor Domain Containing 9                                                         | 4.57   | 5.97   | 0.68  | 0.59  | 0.12  | 9.39E-01 | -2.81 | 3.14E-03 | 0.03  | 9.93E-01 | M-1 |
| ENSMMUG000000001044 | AKT1     | AKT Serine/threonine Kinase 1                                                     | 12.75  | 20.39  | 3.08  | 3.34  | -0.91 | 5.44E-01 | -3.29 | 5.88E-03 | 2.67  | 1.11E-01 | M-1 |
| ENSMMUG000000010576 | CEP170B  | Centrosomal Protein 170B                                                          | 3.19   | 1.65   | 0.68  | 1.04  | 0.06  | 9.75E-01 | -3.18 | 9.24E-03 | 0.94  | 7.30E-01 | M-1 |
| ENSMMUG000000015202 |          |                                                                                   | 58.00  | 35.94  | 1.37  | 0.25  | -1.13 | 3.31E-01 | -4.97 | 2.54E-07 | -2.06 | 1.89E-01 | M-1 |
| ENSMMUG000000040771 |          |                                                                                   | 18.82  | 10.98  | 0.50  | 0.09  | -1.00 | 4.28E-01 | -5.53 | 2.57E-07 | -1.65 | 4.31E-01 | M-1 |
| ENSMMUG000000030305 |          |                                                                                   | 342.26 | 435.95 | 27.70 | 2.18  | 0.55  | 6.96E-01 | -5.01 | 3.60E-07 | -2.63 | 5.82E-02 | M-1 |
| ENSMMUG000000011897 |          |                                                                                   | 6.09   | 4.63   | 1.53  | 4.29  | -0.18 | 9.19E-01 | -2.94 | 1.43E-02 | 0.88  | 7.40E-01 | M-1 |
| ENSMMUG000000007514 | ZBED1    | Zinc Finger BED-type Containing 1                                                 | 9.17   | 13.00  | 3.22  | 7.31  | 0.78  | 4.97E-01 | -1.92 | 4.72E-02 | -0.16 | 9.64E-01 | M-1 |
| ENSMMUG000000006193 | SHROOM2  | Shroom Family Member 2                                                            | 19.13  | 10.97  | 3.11  | 4.38  | -0.90 | 3.86E-01 | -1.99 | 2.49E-02 | 0.25  | 9.24E-01 | M-1 |
| ENSMMUG000000013635 | CLCN4    | Chloride Voltage-gated Channel 4                                                  | 4.74   | 2.14   | 0.02  | 0.01  | -2.01 | 2.20E-01 | -7.23 | 8.74E-06 | -0.67 | 8.92E-01 | M-1 |
| ENSMMUG000000003896 | ARHGAP6  | Rho GTPase Activating Protein 6                                                   | 4.33   | 0.98   | 0.04  | 0.14  | -2.40 | 5.62E-02 | -5.74 | 6.23E-06 | 2.83  | 1.30E-01 | M-1 |
| ENSMMUG000000002689 | MSL3     | MSL Complex Subunit 3                                                             | 28.32  | 13.92  | 6.75  | 2.98  | -0.82 | 3.57E-01 | -2.10 | 5.36E-03 | -0.76 | 6.13E-01 | M-1 |
| ENSMMUG000000019415 | GPM6B    | Glycoprotein M6B                                                                  | 9.36   | 12.41  | 1.31  | 1.42  | 0.43  | 7.85E-01 | -3.38 | 1.92E-03 | 0.01  | 9.98E-01 | M-1 |
| ENSMMUG000000017842 | MOSPD2   | Motile Sperm Domain Containing 2                                                  | 13.13  | 9.21   | 1.62  | 3.06  | -0.31 | 7.78E-01 | -2.90 | 1.25E-04 | 1.24  | 3.24E-01 | M-1 |
| ENSMMUG000000016238 | RBBP7    | RB Binding Protein 7, Chromatin Remodeling Factor                                 | 367.75 | 254.78 | 73.57 | 29.28 | -0.42 | 6.35E-01 | -2.69 | 3.31E-05 | -0.26 | 8.93E-01 | M-1 |
| ENSMMUG000000010598 | REPS2    | RALBP1 Associated Eps Domain Containing 2                                         | 21.78  | 5.97   | 2.07  | 0.32  | -1.92 | 8.17E-02 | -3.50 | 5.70E-04 | -1.32 | 4.89E-01 | M-1 |
| ENSMMUG000000012899 | SCML1    | Scm Polycomb Group Protein Like 1                                                 | 5.58   | 3.65   | 1.44  | 0.46  | -0.28 | 8.28E-01 | -1.96 | 3.61E-02 | -1.64 | 2.45E-01 | M-1 |
| ENSMMUG000000004745 | BCLAF3   | BCLAF1 And THRAP3 Family Member 3                                                 | 23.71  | 14.58  | 6.39  | 5.00  | -0.65 | 5.20E-01 | -2.06 | 1.22E-02 | 1.09  | 4.47E-01 | M-1 |

|                     |           |                                                                |       |       |       |       |       |          |        |          |       |          |     |
|---------------------|-----------|----------------------------------------------------------------|-------|-------|-------|-------|-------|----------|--------|----------|-------|----------|-----|
| ENSMMUG0000007500   | CNKS2     | Connector Enhancer Of Kinase Suppressor Of Ras 2               | 3.58  | 2.25  | 0.50  | 0.06  | -1.54 | 1.29E-01 | -2.68  | 4.01E-03 | -1.07 | 5.54E-01 | M-1 |
| ENSMMUG00000023589  | PHEX      | Phosphate Regulating Endopeptidase Homolog X-linked            | 35.06 | 21.84 | 3.34  | 0.56  | -0.62 | 6.52E-01 | -4.18  | 3.02E-05 | -1.51 | 4.08E-01 | M-1 |
| ENSMMUG0000001088   | PTCHD1    | Patched Domain Containing 1                                    | 1.61  | 1.01  | 0.26  | 0.08  | -0.50 | 8.60E-01 | -5.33  | 6.93E-03 | 1.01  | 8.51E-01 | M-1 |
| ENSMMUG00000022849  | MAGEB10   | Melanoma Antigen Family B, 10                                  | 0.43  | 1.65  | 0.03  | 0.18  | 2.71  | 2.53E-01 | -7.05  | 8.72E-04 | 3.72  | 2.78E-01 | M-1 |
| ENSMMUG00000001663  | IL1RAPL1  | Interleukin 1 Receptor Accessory Protein Like 1                | 19.49 | 8.50  | 1.04  | 0.52  | -1.75 | 1.33E-01 | -5.10  | 7.24E-07 | 1.46  | 4.43E-01 | M-1 |
| ENSMMUG00000019345  | LOC707966 | Dystrophin-like                                                | 25.98 | 22.69 | 4.99  | 1.38  | -0.18 | 8.75E-01 | -2.71  | 2.15E-04 | -0.97 | 4.74E-01 | M-1 |
| ENSMMUG00000006967  | LANCL3    | LanC Like 3                                                    | 2.01  | 0.33  | 1.84  | 0.06  | -3.29 | 1.38E-01 | -7.58  | 4.35E-04 | -0.85 | 8.94E-01 | M-1 |
| ENSMMUG00000022734  | LOC701233 | Type-1 Protein Phosphatase Inhibitor 4                         | 2.68  | 8.60  | 0.16  | 0.02  | 0.02  | 9.95E-01 | -10.06 | 1.36E-05 | -0.65 | 9.36E-01 | M-1 |
| ENSMMUG00000019489  | MAOA      | Amine Oxidase [flavin-containing] A                            | 11.93 | 17.32 | 1.89  | 0.63  | 0.16  | 9.15E-01 | -2.35  | 1.64E-02 | -1.70 | 2.59E-01 | M-1 |
| ENSMMUG00000016391  | EFHC2     | EF-hand Domain Containing 2                                    | 2.23  | 0.99  | 0.11  | 0.07  | -0.92 | 5.70E-01 | -4.89  | 1.46E-04 | 1.47  | 5.62E-01 | M-1 |
| ENSMMUG00000023016  | JADE3     | Jade Family PHD Finger 3                                       | 6.76  | 6.13  | 3.37  | 1.66  | -0.39 | 6.81E-01 | -1.57  | 2.86E-02 | 0.02  | 9.95E-01 | M-1 |
| ENSMMUG00000011426  | TIMP1     | TIMP Metallopeptidase Inhibitor 1                              | 51.29 | 98.67 | 1.21  | 3.58  | 1.29  | 3.91E-01 | -7.80  | 1.46E-10 | 2.91  | 1.04E-01 | M-1 |
| ENSMMUG00000015396  | WDR13     | WD Repeat Domain 13                                            | 1.39  | 6.36  | 0.46  | 1.20  | 1.83  | 3.67E-01 | -4.31  | 1.34E-02 | 3.40  | 1.90E-01 | M-1 |
| ENSMMUG00000023494  | TFE3      | Transcription Factor Binding To IGHM Enhancer 3                | 5.44  | 6.12  | 1.72  | 2.56  | 0.30  | 8.26E-01 | -2.12  | 2.95E-02 | 0.89  | 6.46E-01 | M-1 |
| ENSMMUG00000020557  | GPKOW     | G-patch Domain And KOW Motifs                                  | 14.43 | 14.36 | 5.17  | 2.62  | 0.05  | 9.60E-01 | -1.59  | 1.50E-02 | -1.13 | 2.62E-01 | M-1 |
| ENSMMUG00000002193  |           |                                                                | 23.75 | 18.34 | 5.77  | 5.88  | -0.06 | 9.49E-01 | -1.97  | 8.38E-04 | 0.54  | 6.76E-01 | M-1 |
| ENSMMUG00000002593  | TSPYL2    | TSPY Like 2                                                    | 8.79  | 25.91 | 6.61  | 3.43  | 1.56  | 1.15E-01 | -1.85  | 5.00E-02 | -0.67 | 7.43E-01 | M-1 |
| ENSMMUG00000009295  | RIBC1     | RIB43A Domain With Coiled-coils 1                              | 1.61  | 1.29  | 0.27  | 0.69  | -0.62 | 6.66E-01 | -3.02  | 6.22E-03 | 2.00  | 2.45E-01 | M-1 |
| ENSMMUG00000008751  | PHF8      | PHD Finger Protein 8                                           | 52.45 | 24.43 | 12.09 | 7.74  | -0.97 | 1.67E-01 | -1.51  | 1.89E-02 | -0.46 | 7.52E-01 | M-1 |
| ENSMMUG00000005433  | WNK3      | WNK Lysine Deficient Protein Kinase 3                          | 19.09 | 33.68 | 6.78  | 2.35  | 0.73  | 3.31E-01 | -2.36  | 1.42E-04 | -1.24 | 1.95E-01 | M-1 |
| ENSMMUG000000040442 |           |                                                                | 25.21 | 19.97 | 6.29  | 16.98 | -0.61 | 5.48E-01 | -1.69  | 4.28E-02 | 1.26  | 3.38E-01 | M-1 |
| ENSMMUG00000016233  | ARHGEF9   | Cdc42 Guanine Nucleotide Exchange Factor 9                     | 4.39  | 5.94  | 0.22  | 0.76  | 0.54  | 7.45E-01 | -4.84  | 2.63E-05 | 2.04  | 2.82E-01 | M-1 |
| ENSMMUG00000006916  | ZC4H2     | Zinc Finger C4H2-type Containing                               | 6.74  | 5.13  | 3.87  | 0.63  | 0.34  | 8.13E-01 | -2.52  | 1.36E-02 | -1.19 | 5.22E-01 | M-1 |
| ENSMMUG00000013940  | LOC695574 | Chromosome-associated Kinesin KIF4A                            | 46.10 | 25.93 | 13.43 | 12.33 | -0.72 | 2.54E-01 | -1.82  | 7.36E-04 | 0.95  | 2.66E-01 | M-1 |
| ENSMMUG00000013948  | DLG3      | Discs Large MAGUK Scaffold Protein 3                           | 8.89  | 7.18  | 2.67  | 10.09 | -0.17 | 9.01E-01 | -2.26  | 1.09E-02 | 2.04  | 9.20E-02 | M-1 |
| ENSMMUG00000021924  | NHSL2     | NHS Like 2                                                     | 2.80  | 2.43  | 0.96  | 0.04  | -0.78 | 7.17E-01 | -3.45  | 4.24E-02 | -3.35 | 2.06E-01 | M-1 |
| ENSMMUG000000042686 | RTL5      | Retrotransposon Gag Like 5                                     | 2.39  | 4.42  | 0.62  | 0.08  | 1.06  | 5.04E-01 | -5.14  | 4.41E-05 | -1.37 | 5.90E-01 | M-1 |
| ENSMMUG00000021206  |           |                                                                | 12.89 | 8.53  | 2.21  | 1.20  | -0.63 | 6.23E-01 | -2.60  | 9.70E-03 | 0.48  | 8.57E-01 | M-1 |
| ENSMMUG00000009170  |           |                                                                | 16.22 | 25.10 | 3.80  | 0.83  | 0.35  | 8.19E-01 | -3.66  | 4.36E-04 | -0.63 | 8.11E-01 | M-1 |
| ENSMMUG00000020532  | RPS6KA6   | Ribosomal Protein S6 Kinase A6                                 | 2.89  | 3.96  | 0.44  | 0.79  | 0.72  | 6.16E-01 | -3.41  | 1.73E-03 | 0.53  | 8.54E-01 | M-1 |
| ENSMMUG00000013603  | ZNF711    | Zinc Finger Protein 711                                        | 0.47  | 1.62  | 0.41  | 0.11  | 3.10  | 5.35E-02 | -3.74  | 1.57E-02 | -0.47 | 9.17E-01 | M-1 |
| ENSMMUG00000020862  | DIAPH2    | Diaphanous Related Formin 2                                    | 43.60 | 32.32 | 13.14 | 10.09 | -0.46 | 5.56E-01 | -2.28  | 1.50E-04 | 0.81  | 4.64E-01 | M-1 |
| ENSMMUG00000008211  | SYTL4     | Synaptotagmin Like 4                                           | 40.02 | 34.58 | 0.48  | 0.60  | -0.38 | 7.71E-01 | -6.06  | 7.88E-12 | -0.02 | 9.96E-01 | M-1 |
| ENSMMUG00000003419  | BHLHB9    | Basic Helix-loop-helix Family Member B9                        | 11.94 | 5.29  | 0.85  | 1.07  | -1.36 | 1.52E-01 | -3.22  | 1.04E-04 | 1.06  | 4.97E-01 | M-1 |
| ENSMMUG00000003502  |           |                                                                | 25.58 | 21.09 | 1.27  | 0.99  | -0.82 | 4.79E-01 | -3.84  | 2.61E-05 | -0.48 | 8.46E-01 | M-1 |
| ENSMMUG00000008207  | TSC22D3   | TSC22 Domain Family Member 3                                   | 0.59  | 0.49  | 0.20  | 0.06  | -0.63 | 8.26E-01 | -5.32  | 9.07E-03 | 2.75  | 4.44E-01 | M-1 |
| ENSMMUG00000016666  | CHRDL1    | Chordin Like 1                                                 | 2.37  | 2.37  | 0.04  | 0.18  | -0.14 | 9.59E-01 | -7.52  | 5.66E-05 | 3.00  | 3.27E-01 | M-1 |
| ENSMMUG00000017323  | LRCH2     | Leucine Rich Repeats And Calponin Homology Domain Containing 2 | 2.09  | 1.92  | 0.32  | 0.09  | 0.74  | 8.09E-01 | -5.43  | 1.31E-02 | 0.38  | 9.63E-01 | M-1 |
| ENSMMUG00000017109  | PNP       | Purine Nucleoside Phosphorylase                                | 5.15  | 9.10  | 0.84  | 1.37  | -1.25 | 4.75E-01 | -4.10  | 7.10E-03 | 1.59  | 5.97E-01 | M-1 |

|                    |              |                                                                  |        |        |       |       |       |          |       |          |       |          |     |
|--------------------|--------------|------------------------------------------------------------------|--------|--------|-------|-------|-------|----------|-------|----------|-------|----------|-----|
| ENSMMUG00000014466 | PGRMC1       | Progesterone Receptor Membrane Component 1                       | 30.61  | 8.76   | 7.14  | 3.39  | -1.27 | 3.20E-01 | -2.95 | 8.24E-03 | 0.85  | 7.33E-01 | M-1 |
| ENSMMUG00000017669 | SEPT6        | Septin 6                                                         | 0.37   | 0.61   | 0.13  | 0.43  | 1.35  | 4.76E-01 | -4.64 | 3.83E-03 | 0.67  | 8.79E-01 | M-1 |
| ENSMMUG00000011076 | ZBTB33       | Zinc Finger And BTB Domain Containing 33                         | 108.36 | 66.83  | 23.53 | 12.96 | -0.85 | 2.19E-01 | -2.21 | 1.86E-04 | -0.09 | 9.69E-01 | M-1 |
| ENSMMUG00000023574 | C1GALT1C1    | C1GALT1 Specific Chaperone 1                                     | 1.69   | 6.79   | 3.09  | 3.70  | 2.30  | 1.01E-01 | -2.95 | 2.66E-02 | 1.41  | 5.69E-01 | M-1 |
| ENSMMUG00000011474 | XPNPEP2      | X-prolyl Aminopeptidase 2                                        | 1.61   | 0.98   | 0.02  | 0.14  | -1.63 | 3.11E-01 | -6.87 | 9.98E-06 | 3.90  | 6.56E-02 | M-1 |
| ENSMMUG00000008389 | RBMX2        | RNA Binding Motif Protein, X-linked 2                            | 91.33  | 42.04  | 18.35 | 5.02  | -1.29 | 5.86E-02 | -1.75 | 6.18E-03 | -0.91 | 4.05E-01 | M-1 |
| ENSMMUG00000048745 | RAP2A        | RAP2A, Member Of RAS Oncogene Family                             | 17.28  | 6.88   | 3.21  | 2.32  | -1.02 | 3.19E-01 | -2.86 | 8.27E-04 | 1.17  | 4.46E-01 | M-1 |
| ENSMMUG00000022505 | MOSPD1       | Motile Sperm Domain Containing 1                                 | 22.83  | 15.94  | 3.98  | 2.42  | -0.44 | 7.46E-01 | -2.63 | 8.04E-03 | 0.14  | 9.69E-01 | M-1 |
| ENSMMUG00000042649 |              |                                                                  | 15.85  | 30.05  | 0.97  | 0.26  | -0.24 | 9.41E-01 | -4.45 | 3.94E-02 | -0.41 | 9.60E-01 | M-1 |
| ENSMMUG00000000466 | AFF2         | AF4/FMR2 Family Member 2                                         | 23.69  | 28.35  | 4.21  | 0.88  | -0.39 | 7.71E-01 | -3.15 | 6.88E-04 | -1.27 | 4.48E-01 | M-1 |
| ENSMMUG00000000671 |              |                                                                  | 10.25  | 6.15   | 0.87  | 0.71  | -0.49 | 6.81E-01 | -3.72 | 1.28E-05 | -0.15 | 9.64E-01 | M-1 |
| ENSMMUG00000006801 | CXHXorf40A   | Chromosome X Open Reading Frame, Human CXorf40A                  | 9.68   | 17.35  | 4.66  | 3.23  | 0.43  | 6.98E-01 | -2.12 | 9.71E-03 | 0.37  | 8.64E-01 | M-1 |
| ENSMMUG00000040826 |              |                                                                  | 0.80   | 1.81   | 0.80  | 0.48  | 0.50  | 7.94E-01 | -2.92 | 3.98E-02 | 2.57  | 2.17E-01 | M-1 |
| ENSMMUG00000022371 | MTM1         | Myotubularin 1                                                   | 15.56  | 12.55  | 3.00  | 5.55  | 0.03  | 9.85E-01 | -2.73 | 1.06E-03 | 1.93  | 1.04E-01 | M-1 |
| ENSMMUG00000040955 | LOC106995364 | Melanoma-associated Antigen 3-like                               | 0.84   | 5.30   | 0.45  | 0.06  | 0.73  | 7.64E-01 | -5.10 | 5.25E-03 | -1.88 | 6.04E-01 | M-1 |
| ENSMMUG00000048516 |              |                                                                  | 1.87   | 8.30   | 1.54  | 0.07  | 1.28  | 4.79E-01 | -5.30 | 4.50E-04 | -2.73 | 2.59E-01 | M-1 |
| ENSMMUG00000020743 | CETN2        | Centrin 2                                                        | 32.19  | 52.22  | 14.88 | 19.87 | 0.41  | 7.36E-01 | -2.28 | 9.71E-03 | 1.84  | 1.44E-01 | M-1 |
| ENSMMUG00000013386 | ZNF275       | Zinc Finger Protein 275                                          | 8.15   | 4.85   | 3.21  | 0.86  | -0.89 | 3.43E-01 | -2.02 | 1.26E-02 | 0.54  | 7.72E-01 | M-1 |
| ENSMMUG00000029032 | LOC697254    | L-threonine 3-dehydrogenase, Mitochondrial                       | 21.50  | 15.22  | 1.00  | 0.10  | -1.00 | 5.42E-01 | -4.40 | 8.15E-04 | -3.61 | 6.09E-02 | M-1 |
| ENSMMUG00000010180 | SOX7         | SRY-box 7                                                        | 6.51   | 9.19   | 2.46  | 1.82  | 0.23  | 8.58E-01 | -1.90 | 2.69E-02 | -0.20 | 9.45E-01 | M-1 |
| ENSMMUG00000044812 | VPS37A       | VPS37A, ESCRT-I Subunit                                          | 66.15  | 31.82  | 17.43 | 12.40 | -1.07 | 1.12E-01 | -1.53 | 1.43E-02 | 0.40  | 7.87E-01 | M-1 |
| ENSMMUG00000001151 | MTUS1        | Microtubule Associated Scaffold Protein 1                        | 73.11  | 65.15  | 11.47 | 18.29 | -0.23 | 8.50E-01 | -3.47 | 4.33E-06 | 1.74  | 1.21E-01 | M-1 |
| ENSMMUG00000021680 | NAT2         | N-acetyltransferase 2 (arylamine N-acetyltransferase)            | 2.65   | 0.41   | 0.04  | 0.06  | -2.17 | 1.43E-01 | -3.83 | 1.68E-02 | -0.03 | 9.97E-01 | M-1 |
| ENSMMUG00000016385 | PSD3         | Pleckstrin And Sec7 Domain Containing 3                          | 67.00  | 54.51  | 11.40 | 5.32  | -0.44 | 6.10E-01 | -2.38 | 2.42E-04 | -0.56 | 6.99E-01 | M-1 |
| ENSMMUG00000000129 | SH2D4A       | SH2 Domain Containing 4A                                         | 160.77 | 76.77  | 20.82 | 10.37 | -1.39 | 1.61E-01 | -3.64 | 2.04E-05 | 1.27  | 4.07E-01 | M-1 |
| ENSMMUG00000000130 | CSGALNACT1   | Chondroitin Sulfate N-acetylgalactosaminyltransferase 1          | 4.75   | 2.20   | 0.10  | 0.11  | -0.68 | 6.01E-01 | -5.04 | 5.09E-07 | -0.17 | 9.67E-01 | M-1 |
| ENSMMUG00000018520 | PDLIM2       | PDZ And LIM Domain 2                                             | 7.10   | 2.50   | 0.25  | 0.41  | -1.29 | 2.13E-01 | -4.59 | 2.52E-07 | 1.65  | 2.56E-01 | M-1 |
| ENSMMUG00000041411 | EGR3         | Early Growth Response 3                                          | 0.99   | 3.36   | 2.53  | 0.01  | 1.94  | 3.32E-01 | -6.05 | 1.25E-03 | -1.28 | 7.85E-01 | M-1 |
| ENSMMUG00000009796 | NKX3-1       | NK3 Homeobox 1                                                   | 62.47  | 21.56  | 3.32  | 0.21  | -2.17 | 5.76E-02 | -4.97 | 1.38E-06 | -1.28 | 5.29E-01 | M-1 |
| ENSMMUG00000046427 |              |                                                                  | 65.98  | 72.34  | 35.09 | 0.17  | -1.69 | 3.60E-01 | -4.08 | 1.16E-02 | -2.79 | 3.20E-01 | M-1 |
| ENSMMUG00000005760 | EBF2         | Early B-cell Factor 2                                            | 7.13   | 3.20   | 0.17  | 0.33  | -1.00 | 4.46E-01 | -3.34 | 2.07E-03 | 0.41  | 8.98E-01 | M-1 |
| ENSMMUG00000023646 | BNIP3L       | BCL2 Interacting Protein 3 Like                                  | 49.27  | 32.97  | 9.38  | 5.58  | -0.99 | 3.12E-01 | -2.54 | 2.14E-03 | 0.10  | 9.74E-01 | M-1 |
| ENSMMUG00000010092 | TRIM35       | Tripartite Motif Containing 35                                   | 0.48   | 1.63   | 0.29  | 1.59  | 2.89  | 1.71E-01 | -5.94 | 1.80E-03 | 3.16  | 2.94E-01 | M-1 |
| ENSMMUG00000016016 | CCDC25       | Coiled-coil Domain Containing 25                                 | 55.51  | 33.14  | 10.44 | 8.87  | -1.16 | 1.61E-01 | -1.87 | 1.34E-02 | -0.83 | 5.60E-01 | M-1 |
| ENSMMUG00000016018 | ESCO2        | Establishment Of Sister Chromatid Cohesion N-acetyltransferase 2 | 102.67 | 60.56  | 36.32 | 14.84 | -0.67 | 4.56E-01 | -1.88 | 1.18E-02 | -0.48 | 7.88E-01 | M-1 |
| ENSMMUG00000007486 | FZD3         | Frizzled Class Receptor 3                                        | 20.54  | 18.97  | 2.13  | 0.88  | 0.14  | 9.32E-01 | -3.61 | 1.80E-04 | -0.48 | 8.53E-01 | M-1 |
| ENSMMUG00000017700 | EXTL3        | Exostosin Like Glycosyltransferase 3                             | 46.15  | 12.94  | 3.59  | 2.17  | -1.48 | 7.85E-02 | -2.19 | 5.09E-03 | -1.03 | 4.57E-01 | M-1 |
| ENSMMUG00000029016 |              |                                                                  | 1.89   | 1.31   | 0.06  | 0.08  | -0.29 | 9.15E-01 | -5.36 | 3.84E-03 | 0.83  | 8.69E-01 | M-1 |
| ENSMMUG00000022511 | FUT10        | Fucosyltransferase 10                                            | 2.18   | 1.77   | 0.21  | 1.26  | -0.97 | 4.68E-01 | -2.42 | 3.39E-02 | 1.08  | 6.25E-01 | M-1 |
| ENSMMUG00000010638 | UNC5D        | Unc-5 Netrin Receptor D                                          | 10.52  | 4.32   | 1.24  | 0.16  | -1.08 | 4.44E-01 | -2.98 | 1.16E-02 | -1.07 | 6.67E-01 | M-1 |
| ENSMMUG00000016120 | GOLGA7       | Golgin A7                                                        | 109.09 | 192.86 | 76.39 | 35.80 | 0.76  | 2.32E-01 | -1.97 | 2.78E-04 | -0.39 | 7.62E-01 | M-1 |

|                    |         |                                                                          |        |       |       |       |       |          |       |          |       |          |     |
|--------------------|---------|--------------------------------------------------------------------------|--------|-------|-------|-------|-------|----------|-------|----------|-------|----------|-----|
| ENSMMUG00000011263 | MTRF1   | Mitochondrial Fission Regulator 1                                        | 21.02  | 30.13 | 11.81 | 8.44  | 0.72  | 3.36E-01 | -1.76 | 5.78E-03 | -0.51 | 7.16E-01 | M-1 |
| ENSMMUG00000011262 | PDE7A   | Phosphodiesterase 7A                                                     | 26.67  | 10.95 | 5.27  | 1.58  | -1.06 | 3.00E-01 | -3.63 | 1.78E-05 | 0.88  | 6.19E-01 | M-1 |
| ENSMMUG00000020612 | VCP1P1  | Valosin Containing Protein Interacting Protein 1                         | 30.76  | 35.69 | 7.87  | 7.49  | 0.09  | 9.19E-01 | -2.80 | 2.69E-07 | 0.10  | 9.64E-01 | M-1 |
| ENSMMUG00000040545 |         |                                                                          | 5.07   | 8.80  | 0.27  | 0.65  | -1.36 | 5.28E-01 | -5.44 | 2.91E-03 | 3.38  | 2.39E-01 | M-1 |
| ENSMMUG00000023015 | CPA6    | Carboxypeptidase A6                                                      | 3.83   | 2.93  | 0.07  | 0.01  | -2.44 | 2.35E-01 | -4.86 | 1.46E-02 | -4.16 | 1.64E-01 | M-1 |
| ENSMMUG00000016023 | PREX2   | Phosphatidylinositol-3,4,5-trisphosphate Dependent Rac Exchange Factor 2 | 3.63   | 2.11  | 0.12  | 0.14  | -0.55 | 7.54E-01 | -7.90 | 2.93E-09 | 3.24  | 7.62E-02 | M-1 |
| ENSMMUG00000015978 | NCOA2   | Nuclear Receptor Coactivator 2                                           | 31.36  | 23.31 | 3.92  | 12.53 | -0.29 | 8.12E-01 | -3.08 | 1.86E-04 | 1.40  | 3.00E-01 | M-1 |
| ENSMMUG00000007576 | EYA1    | EYA Transcriptional Coactivator And Phosphatase 1                        | 11.81  | 20.97 | 4.22  | 1.23  | 0.35  | 7.51E-01 | -2.80 | 2.35E-04 | -0.37 | 8.61E-01 | M-1 |
| ENSMMUG00000022326 | GDAP1   | Ganglioside Induced Differentiation Associated Protein 1                 | 126.71 | 61.35 | 16.48 | 2.20  | -1.31 | 1.89E-01 | -2.20 | 1.45E-02 | -2.25 | 5.80E-02 | M-1 |
| ENSMMUG00000023342 | PAG1    | Phosphoprotein Membrane Anchor With Glycosphingolipid Microdomains 1     | 2.53   | 0.79  | 0.01  | 0.13  | -2.99 | 1.54E-01 | -4.61 | 3.13E-02 | 5.13  | 6.46E-02 | M-1 |
| ENSMMUG00000007694 | SNX16   | Sorting Nexin 16                                                         | 22.25  | 20.34 | 5.34  | 3.71  | -0.02 | 9.85E-01 | -2.73 | 1.70E-04 | -0.45 | 8.07E-01 | M-1 |
| ENSMMUG00000007115 |         |                                                                          | 0.76   | 0.81  | 0.03  | 0.05  | 0.52  | 8.77E-01 | -5.20 | 3.52E-02 | 0.27  | 9.75E-01 | M-1 |
| ENSMMUG00000001751 | CNBD1   | Cyclic Nucleotide Binding Domain Containing 1                            | 27.67  | 24.65 | 8.09  | 0.71  | -0.51 | 7.51E-01 | -3.45 | 2.64E-03 | -1.73 | 3.81E-01 | M-1 |
| ENSMMUG00000023115 | RUNX1T1 | RUNX1 Translocation Partner 1                                            | 87.63  | 75.97 | 7.19  | 1.75  | -0.04 | 9.83E-01 | -5.72 | 2.86E-09 | 0.19  | 9.60E-01 | M-1 |
| ENSMMUG00000012981 | VIRMA   | Vir Like M6A Methyltransferase Associated                                | 12.00  | 23.22 | 5.64  | 7.07  | 0.81  | 3.00E-01 | -1.94 | 3.77E-03 | 0.88  | 4.59E-01 | M-1 |
| ENSMMUG00000020286 |         |                                                                          | 7.62   | 1.19  | 0.64  | 0.17  | -2.95 | 8.97E-02 | -4.28 | 1.63E-02 | 1.77  | 6.31E-01 | M-1 |
| ENSMMUG00000020072 | MATN2   | Matrilin 2                                                               | 1.03   | 0.51  | 0.06  | 0.04  | -0.37 | 8.51E-01 | -4.84 | 4.91E-04 | 0.38  | 9.36E-01 | M-1 |
| ENSMMUG00000022186 | VPS13B  | Vacuolar Protein Sorting 13 Homolog B                                    | 17.68  | 12.65 | 4.83  | 4.05  | -0.62 | 4.30E-01 | -1.60 | 1.39E-02 | -0.05 | 9.83E-01 | M-1 |
| ENSMMUG00000013742 | RGS22   | Regulator Of G Protein Signaling 22                                      | 5.23   | 2.38  | 0.63  | 0.34  | -1.63 | 5.98E-02 | -2.24 | 6.68E-03 | -1.06 | 4.75E-01 | M-1 |
| ENSMMUG00000019407 | RIMS2   | Regulating Synaptic Membrane Exocytosis 2                                | 0.67   | 1.31  | 0.30  | 0.21  | -0.93 | 6.19E-01 | -4.28 | 4.74E-03 | -0.25 | 9.66E-01 | M-1 |
| ENSMMUG00000007721 | ZFPM2   | Zinc Finger Protein, FOG Family Member 2                                 | 3.70   | 0.63  | 0.15  | 0.11  | -1.91 | 8.18E-02 | -2.66 | 1.11E-02 | -0.79 | 7.40E-01 | M-1 |
| ENSMMUG00000010744 |         |                                                                          | 31.31  | 16.40 | 3.54  | 3.83  | -1.47 | 1.17E-01 | -2.60 | 2.51E-03 | -0.09 | 9.76E-01 | M-1 |
| ENSMMUG00000007342 | CSMD3   | CUB And Sushi Multiple Domains 3                                         | 2.61   | 0.90  | 1.56  | 0.18  | -1.36 | 2.41E-01 | -3.78 | 1.39E-04 | 0.21  | 9.53E-01 | M-1 |
| ENSMMUG00000008635 | EXT1    | Exostosin Glycosyltransferase 1                                          | 91.58  | 54.63 | 12.82 | 6.07  | -0.35 | 7.72E-01 | -2.48 | 3.27E-03 | -0.41 | 8.55E-01 | M-1 |
| ENSMMUG00000004296 | MAL2    | Mal, T-cell Differentiation Protein 2                                    | 52.18  | 69.01 | 7.32  | 0.96  | 0.65  | 7.06E-01 | -3.66 | 3.87E-03 | -2.61 | 1.66E-01 | M-1 |
| ENSMMUG00000004903 | ENPP2   | Ectonucleotide Pyrophosphatase/phosphodiesterase 2                       | 1.80   | 0.97  | 0.05  | 0.10  | -0.83 | 6.80E-01 | -5.55 | 2.72E-04 | 1.94  | 4.89E-01 | M-1 |
| ENSMMUG00000045043 | HAS2    | Hyaluronan Synthase 2                                                    | 0.98   | 0.47  | 0.04  | 0.15  | -2.20 | 1.12E-01 | -2.88 | 3.52E-02 | 0.15  | 9.76E-01 | M-1 |
| ENSMMUG00000005363 | ZHX2    | Zinc Fingers And Homeoboxes 2                                            | 12.15  | 7.65  | 1.09  | 0.89  | -1.24 | 2.90E-01 | -4.01 | 4.66E-05 | 0.47  | 8.63E-01 | M-1 |
| ENSMMUG00000006050 | ZHX1    | Zinc Fingers And Homeoboxes 1                                            | 36.78  | 22.11 | 9.49  | 5.47  | -0.85 | 3.02E-01 | -2.18 | 1.86E-03 | 0.48  | 7.72E-01 | M-1 |
| ENSMMUG00000016375 | FER1L6  | Fer-1 Like Family Member 6                                               | 13.55  | 13.95 | 0.32  | 0.14  | -0.76 | 5.45E-01 | -5.46 | 8.81E-09 | -0.84 | 7.02E-01 | M-1 |
| ENSMMUG00000015494 | MTSS1   | MTSS1, I-BAR Domain Containing                                           | 106.39 | 82.92 | 7.19  | 4.66  | -0.83 | 4.10E-01 | -5.19 | 3.10E-11 | 0.72  | 6.88E-01 | M-1 |
| ENSMMUG00000003535 | SQLE    | Squalene Epoxidase                                                       | 3.66   | 10.45 | 3.90  | 13.17 | 1.60  | 8.47E-02 | -2.03 | 2.15E-02 | 1.91  | 1.16E-01 | M-1 |
| ENSMMUG00000015345 | GSDMC   | Gasdermin C                                                              | 3.03   | 7.89  | 0.31  | 0.18  | 0.11  | 9.63E-01 | -3.28 | 3.16E-02 | 0.05  | 9.94E-01 | M-1 |
| ENSMMUG00000015647 | LRR6C   | Leucine Rich Repeat Containing 6                                         | 1.07   | 1.01  | 0.08  | 0.45  | -0.05 | 9.85E-01 | -4.11 | 5.16E-03 | 2.65  | 2.36E-01 | M-1 |
| ENSMMUG00000043708 |         |                                                                          | 39.19  | 52.95 | 4.75  | 0.18  | 0.06  | 9.73E-01 | -6.70 | 1.38E-10 | -1.69 | 4.51E-01 | M-1 |
| ENSMMUG00000048066 |         |                                                                          | 8.78   | 13.11 | 3.92  | 4.13  | 0.77  | 5.57E-01 | -2.67 | 1.05E-02 | 0.37  | 9.02E-01 | M-1 |



|                    |             |                                                    |        |        |        |        |       |          |       |          |       |          |     |
|--------------------|-------------|----------------------------------------------------|--------|--------|--------|--------|-------|----------|-------|----------|-------|----------|-----|
| ENSMMUG00000013578 | DENND3      | DENN Domain Containing 3                           | 3.83   | 7.79   | 0.25   | 0.33   | 0.60  | 7.56E-01 | -4.80 | 4.13E-04 | 0.14  | 9.79E-01 | M-1 |
| ENSMMUG00000044582 |             |                                                    | 16.11  | 13.34  | 1.53   | 3.53   | -0.75 | 5.43E-01 | -2.96 | 2.60E-03 | 0.26  | 9.35E-01 | M-1 |
| ENSMMUG00000002659 | CYHR1       | Cysteine And Histidine Rich 1                      | 3.52   | 5.21   | 1.23   | 1.28   | 2.06  | 1.87E-01 | -3.30 | 2.10E-02 | -0.49 | 9.04E-01 | M-1 |
| ENSMMUG00000016080 | ZNF16       | Zinc Finger Protein 16                             | 27.00  | 19.11  | 4.83   | 1.55   | -0.43 | 6.81E-01 | -2.50 | 1.13E-03 | -1.34 | 2.74E-01 | M-1 |
| ENSMMUG00000022067 | IQSEC3      | IQ Motif And Sec7 Domain 3                         | 8.32   | 5.08   | 0.57   | 0.47   | -0.67 | 6.88E-01 | -3.85 | 1.66E-03 | -0.45 | 9.00E-01 | M-1 |
| ENSMMUG00000013653 | SLC6A13     | Solute Carrier Family 6 Member 13                  | 13.21  | 20.88  | 9.04   | 4.74   | 0.72  | 1.36E-01 | -1.50 | 4.48E-04 | -0.58 | 4.49E-01 | M-1 |
| ENSMMUG00000013892 | CCDC77      | Coiled-coil Domain Containing 77                   | 85.09  | 47.42  | 15.06  | 9.53   | -0.80 | 2.86E-01 | -1.40 | 3.49E-02 | -0.76 | 5.28E-01 | M-1 |
| ENSMMUG00000013897 | NINJ2       | Ninjurin 2                                         | 3.73   | 0.99   | 0.09   | 0.07   | -1.88 | 3.94E-01 | -4.26 | 4.52E-02 | -0.97 | 8.54E-01 | M-1 |
| ENSMMUG00000010933 | ERC1        | ELKS/RAB6-interacting/CAST Family Member 1         | 74.19  | 82.18  | 27.22  | 14.84  | -0.02 | 9.79E-01 | -1.40 | 5.20E-03 | -1.15 | 9.97E-02 | M-1 |
| ENSMMUG00000048870 |             |                                                    | 11.04  | 3.84   | 1.01   | 0.07   | -1.94 | 8.32E-02 | -5.39 | 3.91E-07 | -0.99 | 6.79E-01 | M-1 |
| ENSMMUG00000018685 | CHD4        | Chromodomain Helicase DNA Binding Protein 4        | 27.21  | 36.03  | 18.33  | 20.03  | 0.44  | 3.32E-01 | -0.85 | 3.11E-02 | -0.12 | 9.20E-01 | M-1 |
| ENSMMUG00000013701 |             |                                                    | 12.66  | 20.25  | 13.40  | 9.44   | 0.74  | 5.57E-02 | -0.77 | 4.45E-02 | -0.40 | 5.65E-01 | M-1 |
| ENSMMUG00000022680 | A2ML1       | Alpha-2-macroglobulin Like 1                       | 3.80   | 1.79   | 0.14   | 0.17   | -2.61 | 8.09E-02 | -3.82 | 7.09E-03 | -0.37 | 9.36E-01 | M-1 |
| ENSMMUG00000017843 | PHC1        | Polyhomeotic Homolog 1                             | 19.09  | 29.28  | 1.18   | 4.02   | 0.82  | 4.40E-01 | -5.05 | 1.00E-09 | 2.05  | 9.21E-02 | M-1 |
| ENSMMUG00000019112 | GRIN2B      | Glutamate Ionotropic Receptor NMDA Type Subunit 2B | 5.24   | 6.13   | 0.20   | 0.05   | -1.02 | 4.20E-01 | -4.15 | 4.53E-05 | -1.50 | 4.36E-01 | M-1 |
| ENSMMUG00000019299 | WBP11       | WW Domain Binding Protein 11                       | 48.88  | 73.46  | 33.43  | 25.74  | 0.58  | 2.58E-01 | -1.20 | 6.96E-03 | -0.34 | 7.36E-01 | M-1 |
| ENSMMUG00000010460 | RERG        | RAS Like Estrogen Regulated Growth Inhibitor       | 1.09   | 0.43   | 1.00   | 0.03   | -1.03 | 6.92E-01 | -5.26 | 1.16E-02 | 1.79  | 6.90E-01 | M-1 |
| ENSMMUG00000040307 | LMO3        | LIM Domain Only 3                                  | 6.79   | 1.87   | 0.13   | 0.27   | -1.76 | 4.08E-01 | -4.22 | 2.49E-02 | 0.89  | 8.56E-01 | M-1 |
| ENSMMUG00000042911 |             |                                                    | 7.17   | 15.62  | 5.28   | 3.93   | 1.12  | 1.99E-01 | -1.83 | 2.14E-02 | -0.54 | 7.69E-01 | M-1 |
| ENSMMUG00000008269 | PDE3A       | Phosphodiesterase 3A                               | 9.07   | 10.53  | 0.40   | 0.09   | -0.61 | 6.40E-01 | -4.42 | 3.41E-06 | -2.28 | 1.09E-01 | M-1 |
| ENSMMUG00000048731 |             |                                                    | 19.95  | 15.48  | 0.98   | 0.10   | -0.46 | 7.84E-01 | -3.40 | 5.88E-03 | -2.78 | 1.68E-01 | M-1 |
| ENSMMUG00000009601 | LMNTD1      | Lamin Tail Domain Containing 1                     | 2.79   | 1.35   | 0.10   | 0.01   | -2.26 | 2.73E-01 | -4.17 | 3.17E-02 | -3.08 | 3.24E-01 | M-1 |
| ENSMMUG00000011802 | CCDC91      | Coiled-coil Domain Containing 91                   | 11.39  | 8.03   | 6.23   | 4.42   | -0.77 | 4.02E-01 | -1.76 | 2.48E-02 | 1.34  | 2.56E-01 | M-1 |
| ENSMMUG0000001361  | IPO8        | Importin 8                                         | 37.67  | 18.30  | 5.15   | 4.01   | -1.11 | 1.86E-01 | -1.93 | 1.09E-02 | -0.26 | 9.04E-01 | M-1 |
| ENSMMUG00000003221 | DENND5B     | DENN Domain Containing 5B                          | 3.44   | 5.36   | 2.35   | 0.32   | 0.32  | 8.42E-01 | -3.48 | 1.18E-03 | 0.26  | 9.46E-01 | M-1 |
| ENSMMUG00000007395 | BICD1       | BICD Cargo Adaptor 1                               | 0.83   | 1.40   | 0.10   | 0.62   | 1.02  | 5.63E-01 | -3.61 | 1.27E-02 | 1.74  | 5.05E-01 | M-1 |
| ENSMMUG00000015343 | MRPL18      | Mitochondrial Ribosomal Protein L18                | 30.49  | 61.14  | 25.00  | 30.78  | 0.71  | 2.06E-01 | -1.03 | 4.84E-02 | 0.15  | 9.20E-01 | M-1 |
| ENSMMUG00000013666 | CPNE8       | Copine 8                                           | 12.16  | 10.05  | 2.95   | 7.06   | -0.05 | 9.74E-01 | -2.43 | 9.45E-03 | 1.69  | 2.33E-01 | M-1 |
| ENSMMUG00000010077 | C11H12orf40 | Chromosome 11 Open Reading Frame, Human C12orf40   | 7.04   | 13.14  | 4.17   | 5.00   | 1.26  | 2.69E-01 | -2.09 | 4.22E-02 | 0.31  | 9.17E-01 | M-1 |
| ENSMMUG00000021163 | CNTN1       | Contactin 1                                        | 1.79   | 0.38   | 0.36   | 0.01   | -1.63 | 2.95E-01 | -4.60 | 2.24E-03 | -1.40 | 6.83E-01 | M-1 |
| ENSMMUG00000021735 | PPHLN1      | Periphilin 1                                       | 68.69  | 80.00  | 57.73  | 23.07  | 0.23  | 7.40E-01 | -1.15 | 2.61E-02 | -0.54 | 5.84E-01 | M-1 |
| ENSMMUG00000002048 | ASB8        | Ankyrin Repeat And SOCS Box Containing 8           | 27.52  | 29.90  | 4.42   | 4.02   | 0.54  | 6.64E-01 | -3.24 | 3.78E-04 | -0.25 | 9.35E-01 | M-1 |
| ENSMMUG00000048864 | RND1        | Rho Family GTPase 1                                | 16.82  | 12.79  | 4.60   | 0.50   | -0.24 | 8.80E-01 | -2.23 | 3.96E-02 | -2.60 | 6.91E-02 | M-1 |
| ENSMMUG00000015718 | KMT2D       | Lysine Methyltransferase 2D                        | 14.76  | 21.93  | 7.67   | 8.45   | 0.55  | 4.53E-01 | -1.59 | 8.14E-03 | 0.21  | 9.06E-01 | M-1 |
| ENSMMUG00000012769 | LMBR1L      | Limb Development Membrane Protein 1 Like           | 12.17  | 49.72  | 10.08  | 4.05   | 1.69  | 8.39E-02 | -3.31 | 1.58E-04 | -0.33 | 9.00E-01 | M-1 |
| ENSMMUG00000021081 | LOC710110   | Tubulin Alpha-1C Chain                             | #####  | 850.59 | 378.26 | 204.13 | -0.05 | 9.39E-01 | -1.12 | 3.26E-03 | -0.74 | 1.94E-01 | M-1 |
| ENSMMUG00000042879 |             |                                                    | 102.13 | 127.15 | 39.57  | 33.08  | 0.32  | 6.80E-01 | -1.71 | 2.73E-03 | 0.16  | 9.32E-01 | M-1 |
| ENSMMUG00000021689 |             |                                                    | 36.26  | 41.85  | 9.28   | 9.52   | 0.22  | 8.36E-01 | -2.95 | 1.92E-05 | 0.05  | 9.86E-01 | M-1 |
| ENSMMUG00000015048 | LIMA1       | LIM Domain And Actin Binding 1                     | 79.88  | 39.59  | 6.92   | 7.24   | -1.38 | 6.74E-02 | -2.81 | 3.27E-05 | 0.54  | 7.34E-01 | M-1 |
| ENSMMUG00000046877 | ACVR1B      | Activin A Receptor Type 1B                         | 24.21  | 59.72  | 6.66   | 2.00   | 0.65  | 7.16E-01 | -4.89 | 9.62E-05 | -0.76 | 8.12E-01 | M-1 |
| ENSMMUG00000022313 | ATF7        | Activating Transcription Factor 7                  | 7.46   | 17.20  | 5.11   | 2.85   | 1.13  | 1.88E-01 | -2.43 | 1.19E-03 | -0.17 | 9.49E-01 | M-1 |

|                     |             |                                                                                                 |        |        |       |       |       |          |        |          |       |          |     |
|---------------------|-------------|-------------------------------------------------------------------------------------------------|--------|--------|-------|-------|-------|----------|--------|----------|-------|----------|-----|
| ENSMMUG00000009457  | CALCOCO1    | Calcium Binding And Coiled-coil Domain 1                                                        | 42.79  | 36.60  | 18.08 | 8.21  | -0.17 | 8.64E-01 | -1.66  | 1.25E-02 | -0.51 | 7.32E-01 | M-1 |
| ENSMMUG00000016669  | ZNF385A     | Zinc Finger Protein 385A                                                                        | 2.16   | 3.41   | 0.08  | 0.70  | -0.42 | 8.60E-01 | -5.48  | 4.39E-04 | 4.12  | 5.15E-02 | M-1 |
| ENSMMUG00000003755  | ITGA5       | Integrin Subunit Alpha 5                                                                        | 1.46   | 5.32   | 0.07  | 0.80  | 1.05  | 5.72E-01 | -5.64  | 7.68E-05 | 3.49  | 9.18E-02 | M-1 |
| ENSMMUG00000003758  | GTSF1       | Gametocyte Specific Factor 1                                                                    | 176.92 | 117.73 | 28.25 | 16.47 | -1.33 | 1.30E-01 | -2.32  | 3.36E-03 | 0.67  | 6.97E-01 | M-1 |
| ENSMMUG00000006292  | ORMDL2      | ORMDL Sphingolipid Biosynthesis Regulator 2                                                     | 5.51   | 22.47  | 6.96  | 6.41  | 1.38  | 1.64E-01 | -1.83  | 4.85E-02 | 0.19  | 9.51E-01 | M-1 |
| ENSMMUG00000006295  | MMP19       | Matrix Metalloproteinase 19                                                                     | 1.13   | 1.56   | 0.05  | 0.01  | -1.47 | 6.17E-01 | -9.01  | 1.49E-04 | -1.50 | 8.06E-01 | M-1 |
| ENSMMUG00000007523  | IKZF4       | IKAROS Family Zinc Finger 4                                                                     | 1.52   | 2.43   | 0.78  | 1.97  | 1.01  | 3.32E-01 | -1.97  | 3.09E-02 | 1.97  | 1.16E-01 | M-1 |
| ENSMMUG00000008273  | SMARCC2     | SWI/SNF Related, Matrix Associated, Actin Dependent Regulator Of Chromatin Subfamily C Member 2 | 23.63  | 19.59  | 6.64  | 5.98  | -0.12 | 9.09E-01 | -1.72  | 1.03E-02 | 0.06  | 9.81E-01 | M-1 |
| ENSMMUG00000008679  | ANKRD52     | Ankyrin Repeat Domain 52                                                                        | 0.94   | 3.46   | 0.50  | 1.09  | 1.58  | 3.63E-01 | -3.39  | 2.49E-02 | 2.55  | 2.71E-01 | M-1 |
| ENSMMUG00000008860  | GLS2        | Glutaminase 2                                                                                   | 4.20   | 4.87   | 0.88  | 0.99  | -0.15 | 9.23E-01 | -2.16  | 3.10E-02 | 0.02  | 9.97E-01 | M-1 |
| ENSMMUG00000019330  | RBMS2       | RNA Binding Motif Single Stranded Interacting Protein 2                                         | 6.31   | 4.47   | 1.13  | 1.04  | -1.15 | 4.20E-01 | -3.37  | 5.25E-03 | 1.24  | 6.05E-01 | M-1 |
| ENSMMUG00000021115  | ZBTB39      | Zinc Finger And BTB Domain Containing 39                                                        | 34.12  | 17.13  | 3.70  | 5.40  | -0.90 | 1.98E-01 | -2.34  | 9.11E-05 | 0.81  | 4.59E-01 | M-1 |
| ENSMMUG00000019783  | NEMP1       | Nuclear Envelope Integral Membrane Protein 1                                                    | 28.93  | 31.57  | 6.40  | 10.29 | 0.05  | 9.58E-01 | -2.23  | 2.72E-04 | 0.58  | 6.57E-01 | M-1 |
| ENSMMUG00000009996  |             |                                                                                                 | 192.11 | 452.84 | 23.26 | 5.20  | 1.24  | 2.62E-01 | -5.14  | 1.56E-08 | -1.98 | 1.65E-01 | M-1 |
| ENSMMUG00000016625  | IRAK3       | Interleukin 1 Receptor Associated Kinase 3                                                      | 0.84   | 1.06   | 2.39  | 0.15  | 0.71  | 7.67E-01 | -8.58  | 2.81E-06 | 4.67  | 7.40E-02 | M-1 |
| ENSMMUG00000016631  | GRIP1       | Glutamate Receptor Interacting Protein 1                                                        | 3.47   | 1.91   | 0.14  | 0.12  | -0.51 | 7.75E-01 | -4.70  | 1.91E-04 | -0.07 | 9.88E-01 | M-1 |
| ENSMMUG00000000946  | CPM         | Carboxypeptidase M                                                                              | 5.70   | 4.34   | 0.39  | 1.01  | -0.83 | 6.21E-01 | -4.56  | 3.04E-04 | 3.16  | 7.12E-02 | M-1 |
| ENSMMUG00000011075  | PTPRR       | Protein Tyrosine Phosphatase, Receptor Type R                                                   | 3.24   | 1.57   | 0.39  | 0.13  | -1.53 | 2.86E-01 | -3.84  | 2.55E-03 | 0.36  | 9.31E-01 | M-1 |
| ENSMMUG00000007727  | TBC1D15     | TBC1 Domain Family Member 15                                                                    | 14.87  | 19.20  | 9.97  | 7.73  | 0.46  | 5.18E-01 | -1.50  | 9.47E-03 | -0.03 | 9.89E-01 | M-1 |
| ENSMMUG00000009638  | GLIPR1      | GLI Pathogenesis Related 1                                                                      | 41.58  | 17.37  | 2.92  | 1.74  | -1.16 | 3.46E-01 | -2.99  | 4.00E-03 | -0.02 | 9.97E-01 | M-1 |
| ENSMMUG000000031720 |             |                                                                                                 | 107.88 | 148.90 | 72.88 | 46.31 | 0.74  | 4.13E-01 | -1.79  | 2.01E-02 | 0.27  | 9.01E-01 | M-1 |
| ENSMMUG00000000121  | OTOGL       | Otogelin Like                                                                                   | 0.59   | 1.70   | 1.34  | 0.36  | 1.78  | 2.51E-01 | -4.76  | 3.53E-04 | 1.76  | 4.69E-01 | M-1 |
| ENSMMUG00000028665  | MIR618      | MicroRNA 618                                                                                    | 0.72   | 24.54  | 0.23  | 0.00  | -7.21 | 3.57E-01 | -16.21 | 1.66E-02 | -8.98 | 4.41E-01 | M-1 |
| ENSMMUG00000013804  | PPFIA2      | PTPRF Interacting Protein Alpha 2                                                               | 2.44   | 1.53   | 0.06  | 0.05  | -1.47 | 2.86E-01 | -4.95  | 3.06E-05 | 1.61  | 4.89E-01 | M-1 |
| ENSMMUG000000041929 |             |                                                                                                 | 22.23  | 10.72  | 0.95  | 0.19  | -0.67 | 6.95E-01 | -4.50  | 8.02E-04 | -1.04 | 7.71E-01 | M-1 |
| ENSMMUG000000045893 |             |                                                                                                 | 7.77   | 5.19   | 4.89  | 0.09  | -0.41 | 8.95E-01 | -6.13  | 5.47E-03 | 0.59  | 9.38E-01 | M-1 |
| ENSMMUG000000043220 |             |                                                                                                 | 19.65  | 5.96   | 2.68  | 0.22  | -1.52 | 5.04E-01 | -4.90  | 1.38E-02 | -0.72 | 9.04E-01 | M-1 |
| ENSMMUG00000015859  | C11H12orf50 | Chromosome 11 Open Reading Frame, Human C12orf50                                                | 1.99   | 9.09   | 1.19  | 1.08  | 1.99  | 1.98E-01 | -3.18  | 2.44E-02 | -0.30 | 9.51E-01 | M-1 |
| ENSMMUG000000046838 |             |                                                                                                 | 1.75   | 0.70   | 0.02  | 0.02  | -1.95 | 3.64E-01 | -4.48  | 2.26E-02 | 2.22  | 5.62E-01 | M-1 |
| ENSMMUG00000012670  | CRADD       | CASP2 And RIPK1 Domain Containing Adaptor With Death Domain                                     | 41.60  | 22.70  | 1.98  | 2.29  | -0.88 | 5.15E-01 | -3.35  | 1.86E-03 | 0.73  | 7.77E-01 | M-1 |
| ENSMMUG00000018898  | NR2C1       | Nuclear Receptor Subfamily 2 Group C Member 1                                                   | 17.41  | 27.54  | 11.16 | 9.28  | 0.80  | 3.18E-01 | -1.50  | 3.39E-02 | 0.52  | 7.37E-01 | M-1 |
| ENSMMUG00000013812  | USP44       | Ubiquitin Specific Peptidase 44                                                                 | 10.89  | 4.79   | 2.93  | 0.17  | -1.46 | 1.66E-01 | -3.60  | 1.21E-04 | -1.71 | 2.65E-01 | M-1 |
| ENSMMUG00000018145  | ELK3        | ELK3, ETS Transcription Factor                                                                  | 14.43  | 20.74  | 6.43  | 5.68  | 0.27  | 8.66E-01 | -2.89  | 6.05E-03 | 1.34  | 4.75E-01 | M-1 |
| ENSMMUG00000018718  | ANO4        | Anoctamin 4                                                                                     | 1.60   | 0.85   | 0.09  | 0.10  | -0.58 | 7.74E-01 | -3.81  | 1.01E-02 | 1.21  | 7.10E-01 | M-1 |
| ENSMMUG00000015134  | SLC5A8      | Solute Carrier Family 5 Member 8                                                                | 1.49   | 0.32   | 0.02  | 0.02  | -3.07 | 8.18E-02 | -4.18  | 2.32E-02 | -0.12 | 9.86E-01 | M-1 |
| ENSMMUG00000020875  | MYBPC1      | Myosin Binding Protein C, Slow Type                                                             | 1.16   | 1.34   | 0.19  | 0.04  | -0.98 | 6.56E-01 | -4.44  | 1.16E-02 | -3.35 | 1.98E-01 | M-1 |

|                    |             |                                                           |        |        |        |        |       |          |       |          |       |          |     |
|--------------------|-------------|-----------------------------------------------------------|--------|--------|--------|--------|-------|----------|-------|----------|-------|----------|-----|
| ENSMMUG00000005208 | POLR3B      | RNA Polymerase III Subunit B                              | 15.91  | 19.75  | 7.96   | 7.21   | 0.43  | 4.85E-01 | -1.25 | 1.47E-02 | -0.67 | 4.47E-01 | M-1 |
| ENSMMUG00000015544 | PWP1        | PWP1 Homolog, Endonuclease                                | 71.77  | 54.90  | 22.01  | 21.83  | -0.11 | 9.01E-01 | -1.66 | 4.50E-03 | 0.36  | 8.02E-01 | M-1 |
| ENSMMUG00000015550 | PRDM4       | PR/SET Domain 4                                           | 24.99  | 11.98  | 4.43   | 3.86   | -1.01 | 4.23E-01 | -2.79 | 7.65E-03 | 0.39  | 8.98E-01 | M-1 |
| ENSMMUG00000042320 | CMKLR1      | Chemerin Chemokine-like Receptor 1                        | 1.06   | 1.91   | 0.03   | 0.06   | -2.06 | 1.47E-01 | -3.44 | 2.27E-02 | -2.77 | 2.04E-01 | M-1 |
| ENSMMUG00000015107 | SSH1        | Slingshot Protein Phosphatase 1                           | 22.92  | 25.59  | 4.74   | 8.16   | -0.07 | 9.61E-01 | -2.20 | 1.09E-02 | 0.48  | 8.19E-01 | M-1 |
| ENSMMUG00000005237 | USP30       | Ubiquitin Specific Peptidase 30                           | 61.98  | 26.60  | 4.09   | 6.92   | -1.23 | 2.17E-01 | -2.49 | 4.77E-03 | 0.65  | 7.50E-01 | M-1 |
| ENSMMUG00000010484 | GIT2        | GIT ArfGAP 2                                              | 154.50 | 95.23  | 13.97  | 7.51   | -0.54 | 5.77E-01 | -3.39 | 2.39E-06 | -0.03 | 9.91E-01 | M-1 |
| ENSMMUG00000020826 | LOC710254   | Uncharacterized Protein C12orf76                          | 1.53   | 3.90   | 0.23   | 1.05   | 0.09  | 9.73E-01 | -4.61 | 7.95E-03 | 2.53  | 3.97E-01 | M-1 |
| ENSMMUG00000039526 | TCTN1       | Tectonic Family Member 1                                  | 15.97  | 4.76   | 1.21   | 0.16   | -1.44 | 3.25E-01 | -4.76 | 1.07E-04 | -0.51 | 8.89E-01 | M-1 |
| ENSMMUG00000003297 | LOC711766   | Coiled-coil Domain-containing Protein 63                  | 2.47   | 2.35   | 0.13   | 0.02   | -1.22 | 5.26E-01 | -3.67 | 2.61E-02 | -1.96 | 5.60E-01 | M-1 |
| ENSMMUG00000017107 | BRAP        | BRCA1 Associated Protein                                  | 67.83  | 53.60  | 22.48  | 17.06  | -0.47 | 5.24E-01 | -1.35 | 2.57E-02 | -0.21 | 9.02E-01 | M-1 |
| ENSMMUG00000005255 | TRAFD1      | TRAF-type Zinc Finger Domain Containing 1                 | 129.81 | 71.70  | 12.77  | 6.90   | -0.82 | 3.98E-01 | -2.45 | 2.03E-03 | -0.76 | 6.43E-01 | M-1 |
| ENSMMUG00000007126 | HECTD4      | HECT Domain E3 Ubiquitin Protein Ligase 4                 | 3.93   | 3.15   | 2.05   | 2.78   | -0.27 | 8.11E-01 | -1.66 | 3.70E-02 | 1.38  | 2.39E-01 | M-1 |
| ENSMMUG00000012778 | RPH3A       | Rabphilin 3A                                              | 7.41   | 12.08  | 1.70   | 0.07   | 0.38  | 8.30E-01 | -6.26 | 7.58E-08 | -2.36 | 2.06E-01 | M-1 |
| ENSMMUG00000001128 | IQCD        | IQ Motif Containing D                                     | 4.07   | 9.35   | 2.57   | 1.61   | 0.95  | 3.69E-01 | -2.07 | 2.41E-02 | -0.55 | 8.03E-01 | M-1 |
| ENSMMUG00000017478 | TESC        | Tescalcin                                                 | 9.92   | 3.97   | 0.60   | 0.88   | -1.64 | 2.65E-01 | -3.16 | 1.75E-02 | -0.14 | 9.76E-01 | M-1 |
| ENSMMUG00000014027 | NOS1        | Nitric Oxide Synthase 1                                   | 2.69   | 2.11   | 0.39   | 0.03   | -0.81 | 5.87E-01 | -4.73 | 5.85E-05 | -1.82 | 3.95E-01 | M-1 |
| ENSMMUG00000005421 | KSR2        | Kinase Suppressor Of Ras 2                                | 1.68   | 8.86   | 0.23   | 0.02   | 2.46  | 1.99E-01 | -6.36 | 2.37E-04 | -2.40 | 4.89E-01 | M-1 |
| ENSMMUG00000019861 | CIT         | Citron Rho-interacting Serine/threonine Kinase            | 14.12  | 15.68  | 5.59   | 8.36   | 0.42  | 6.74E-01 | -1.90 | 1.13E-02 | 0.92  | 4.98E-01 | M-1 |
| ENSMMUG00000031528 | PLA2G1B     | Phospholipase A2 Group IB                                 | 6.95   | 19.52  | 0.33   | 0.13   | 2.52  | 4.23E-01 | -7.08 | 7.65E-03 | -1.09 | 8.84E-01 | M-1 |
| ENSMMUG00000004223 | RNF10       | Ring Finger Protein 10                                    | 52.70  | 46.28  | 24.69  | 27.71  | 0.25  | 8.27E-01 | -1.63 | 4.45E-02 | 0.64  | 7.07E-01 | M-1 |
| ENSMMUG00000039520 | C11H12orf43 | Chromosome 11 Open Reading Frame, Human C12orf43          | 3.95   | 21.79  | 3.31   | 2.63   | 1.82  | 1.47E-01 | -2.89 | 1.17E-02 | -0.35 | 9.20E-01 | M-1 |
| ENSMMUG00000037708 |             |                                                           | 15.07  | 20.15  | 10.53  | 0.21   | 1.12  | 5.44E-01 | -5.30 | 1.00E-03 | -1.77 | 5.93E-01 | M-1 |
| ENSMMUG00000003521 | P2RX4       | Purinergic Receptor P2X 4                                 | 22.43  | 21.04  | 0.64   | 0.76   | -0.28 | 8.67E-01 | -5.51 | 2.69E-07 | 0.94  | 7.03E-01 | M-1 |
| ENSMMUG00000021563 | RNF34       | Ring Finger Protein 34                                    | 105.52 | 93.95  | 9.29   | 9.60   | -0.02 | 9.89E-01 | -3.63 | 2.00E-06 | 0.32  | 8.87E-01 | M-1 |
| ENSMMUG00000041124 | MORN3       | MORN Repeat Containing 3                                  | 0.40   | 1.06   | 0.08   | 0.15   | 1.41  | 5.43E-01 | -4.21 | 3.08E-02 | 0.89  | 8.59E-01 | M-1 |
| ENSMMUG00000012842 | SETD1B      | SET Domain Containing 1B                                  | 16.50  | 13.72  | 5.60   | 4.92   | -0.34 | 7.92E-01 | -3.10 | 4.75E-04 | 1.93  | 1.40E-01 | M-1 |
| ENSMMUG00000012652 | MLXIP       | MLX Interacting Protein                                   | 5.64   | 16.06  | 3.54   | 9.44   | 1.52  | 1.21E-01 | -2.41 | 7.31E-03 | -1.01 | 5.54E-01 | M-1 |
| ENSMMUG00000019678 | MPHOSPH9    | M-phase Phosphoprotein 9                                  | 8.38   | 11.29  | 4.08   | 2.91   | -0.39 | 7.63E-01 | -2.55 | 6.03E-03 | 0.14  | 9.68E-01 | M-1 |
| ENSMMUG00000013181 | EIF2B1      | Eukaryotic Translation Initiation Factor 2B Subunit Alpha | 17.56  | 61.00  | 13.56  | 17.32  | 1.70  | 8.11E-02 | -2.69 | 2.64E-03 | 0.96  | 5.84E-01 | M-1 |
| ENSMMUG00000006861 | LOC710343   | Dynein Heavy Chain 10, Axonemal                           | 1.59   | 1.99   | 0.16   | 0.12   | -1.46 | 2.98E-01 | -2.81 | 2.40E-02 | -1.69 | 4.26E-01 | M-1 |
| ENSMMUG00000009212 | CCDC92      | Coiled-coil Domain Containing 92                          | 9.14   | 11.05  | 0.76   | 0.15   | -1.55 | 4.42E-01 | -3.74 | 3.16E-02 | -3.07 | 2.39E-01 | M-1 |
| ENSMMUG00000023107 | NCOR2       | Nuclear Receptor Corepressor 2                            | 6.67   | 8.39   | 1.25   | 3.58   | -0.72 | 5.67E-01 | -3.14 | 1.24E-03 | 1.38  | 4.21E-01 | M-1 |
| ENSMMUG00000016486 | SCARB1      | Scavenger Receptor Class B Member 1                       | 4.51   | 2.32   | 0.25   | 0.15   | -0.89 | 5.39E-01 | -4.11 | 3.06E-04 | 0.37  | 9.16E-01 | M-1 |
| ENSMMUG00000002320 | UBC         | Ubiquitin C                                               | 254.55 | 283.74 | 155.01 | 128.29 | 0.06  | 9.50E-01 | -1.27 | 4.02E-02 | -0.91 | 3.52E-01 | M-1 |
| ENSMMUG00000005213 | BRI3BP      | BRI3 Binding Protein                                      | 7.25   | 20.05  | 2.24   | 5.79   | 0.61  | 7.48E-01 | -3.12 | 2.45E-02 | 2.94  | 1.28E-01 | M-1 |
| ENSMMUG00000002041 | ADGRD1      | Adhesion G Protein-coupled Receptor D1                    | 2.64   | 3.13   | 0.38   | 0.04   | -1.43 | 3.54E-01 | -3.14 | 1.90E-02 | -3.40 | 5.93E-02 | M-1 |
| ENSMMUG00000020343 | SFSWAP      | Splicing Factor SWAP                                      | 15.88  | 35.94  | 21.79  | 15.38  | 0.91  | 1.68E-01 | -1.39 | 2.14E-02 | 0.39  | 7.79E-01 | M-1 |
| ENSMMUG00000017729 | LOC709936   | E1A-binding Protein P400                                  | 11.66  | 23.98  | 4.62   | 6.44   | 1.16  | 2.16E-01 | -2.72 | 7.69E-04 | 0.84  | 6.08E-01 | M-1 |
| ENSMMUG00000021279 | ZMYND11     | Zinc Finger MYND-type Containing 11                       | 37.45  | 34.74  | 10.35  | 5.49   | 0.18  | 8.58E-01 | -2.61 | 6.92E-05 | -0.01 | 9.98E-01 | M-1 |
| ENSMMUG00000020280 | DIP2C       | Disco Interacting Protein 2 Homolog C                     | 9.01   | 19.80  | 4.73   | 1.80   | 1.11  | 1.47E-01 | -3.33 | 4.25E-07 | 0.11  | 9.67E-01 | M-1 |
| ENSMMUG00000004935 | PFKP        | Phosphofructokinase, Platelet                             | 36.11  | 11.77  | 3.42   | 3.94   | -1.89 | 9.43E-02 | -2.75 | 8.65E-03 | 0.65  | 8.00E-01 | M-1 |

|                     |          |                                                           |        |        |        |        |       |          |       |          |       |          |     |
|---------------------|----------|-----------------------------------------------------------|--------|--------|--------|--------|-------|----------|-------|----------|-------|----------|-----|
| ENSMMUG00000013180  | FAM208B  | Family With Sequence Similarity 208 Member B              | 22.77  | 25.17  | 13.14  | 13.68  | 0.18  | 7.02E-01 | -1.17 | 6.41E-04 | 0.18  | 8.41E-01 | M-1 |
| ENSMMUG00000013182  | GDI2     | GDP Dissociation Inhibitor 2                              | 208.92 | 220.08 | 106.92 | 102.00 | 0.04  | 9.57E-01 | -1.04 | 4.71E-02 | -0.09 | 9.62E-01 | M-1 |
| ENSMMUG00000015143  | FBXO18   | F-box Protein, Helicase, 18                               | 18.67  | 18.81  | 7.53   | 5.79   | 0.09  | 9.46E-01 | -1.86 | 3.09E-02 | 0.03  | 9.92E-01 | M-1 |
| ENSMMUG00000015149  | IL15RA   | Interleukin 15 Receptor Subunit Alpha                     | 1.33   | 3.79   | 0.06   | 0.05   | 0.31  | 9.01E-01 | -6.22 | 1.25E-04 | 1.35  | 7.32E-01 | M-1 |
| ENSMMUG00000047800  | PFKFB3   | 6-phosphofructo-2-kinase/fructose-2,6-biphosphatase 3     | 1.02   | 9.22   | 0.82   | 0.69   | 2.50  | 9.56E-02 | -3.12 | 2.83E-02 | 0.29  | 9.53E-01 | M-1 |
| ENSMMUG00000020776  | PRKCQ    | Protein Kinase C Theta                                    | 2.39   | 1.24   | 1.97   | 0.05   | -2.09 | 2.32E-01 | -4.42 | 4.79E-03 | -0.35 | 9.49E-01 | M-1 |
| ENSMMUG00000019194  | SFMBT2   | Scm Like With Four Mbt Domains 2                          | 0.46   | 3.02   | 0.45   | 0.84   | 2.05  | 1.61E-01 | -4.25 | 1.23E-03 | 2.57  | 1.99E-01 | M-1 |
| ENSMMUG00000015850  | ITIH5    | Inter-alpha-trypsin Inhibitor Heavy Chain Family Member 5 | 6.19   | 5.27   | 0.27   | 0.40   | -0.30 | 8.15E-01 | -4.20 | 8.02E-07 | 0.27  | 9.24E-01 | M-1 |
| ENSMMUG00000013101  | TAF3     | TATA-box Binding Protein Associated Factor 3              | 38.51  | 46.15  | 20.08  | 7.21   | 0.27  | 7.45E-01 | -1.33 | 2.69E-02 | -1.26 | 1.32E-01 | M-1 |
| ENSMMUG00000023766  | MINDY3   | MINDY Lysine 48 Deubiquitinase 3                          | 50.85  | 33.31  | 12.19  | 6.77   | -0.79 | 2.25E-01 | -1.56 | 6.41E-03 | -0.44 | 7.36E-01 | M-1 |
| ENSMMUG00000016069  |          |                                                           | 4.37   | 1.19   | 0.03   | 0.09   | -2.23 | 5.53E-02 | -5.99 | 2.04E-08 | 1.54  | 4.31E-01 | M-1 |
| ENSMMUG00000003193  | VIM      | Vimentin                                                  | 8.34   | 13.10  | 1.66   | 0.29   | 0.50  | 7.56E-01 | -4.25 | 1.49E-04 | -1.02 | 6.79E-01 | M-1 |
| ENSMMUG00000011620  | MRC1     | Mannose Receptor C-type 1                                 | 6.87   | 1.87   | 0.12   | 0.03   | -1.65 | 1.83E-01 | -5.69 | 4.41E-07 | -1.58 | 4.82E-01 | M-1 |
| ENSMMUG00000011624  | SLC39A12 | Solute Carrier Family 39 Member 12                        | 2.75   | 2.70   | 0.61   | 0.03   | -0.62 | 6.60E-01 | -5.18 | 3.12E-06 | -1.68 | 4.01E-01 | M-1 |
| ENSMMUG00000007451  | NSUN6    | NOP2/Sun RNA Methyltransferase Family Member 6            | 29.31  | 12.45  | 4.81   | 2.31   | -1.31 | 7.52E-02 | -1.72 | 1.43E-02 | -0.37 | 8.34E-01 | M-1 |
| ENSMMUG00000022383  | THNSL1   | Threonine Synthase Like 1                                 | 4.18   | 1.05   | 0.05   | 0.06   | -1.56 | 3.68E-01 | -5.55 | 2.68E-04 | -1.07 | 7.90E-01 | M-1 |
| ENSMMUG00000002930  | GPR158   | G Protein-coupled Receptor 158                            | 5.15   | 1.74   | 0.30   | 0.05   | -2.18 | 7.76E-02 | -3.80 | 9.80E-04 | -1.13 | 6.51E-01 | M-1 |
| ENSMMUG000000039463 |          |                                                           | 10.95  | 14.86  | 7.95   | 0.13   | -0.42 | 8.16E-01 | -5.92 | 1.02E-06 | -1.79 | 4.29E-01 | M-1 |
| ENSMMUG00000020663  | MPP7     | Membrane Palmitoylated Protein 7                          | 22.37  | 26.62  | 6.29   | 7.33   | 0.29  | 8.06E-01 | -1.70 | 4.13E-02 | -0.64 | 7.17E-01 | M-1 |
| ENSMMUG000000039113 |          |                                                           | 0.30   | 1.79   | 0.00   | 0.10   | 2.10  | 4.78E-01 | -7.52 | 3.09E-03 | 3.95  | 3.51E-01 | M-1 |
| ENSMMUG00000015453  | ZEB1     | Zinc Finger E-box Binding Homeobox 1                      | 1.60   | 5.41   | 1.10   | 0.42   | 1.31  | 3.46E-01 | -2.66 | 2.84E-02 | -2.10 | 2.52E-01 | M-1 |
| ENSMMUG00000009899  |          |                                                           | 24.27  | 30.41  | 7.35   | 4.24   | 0.70  | 4.22E-01 | -2.85 | 3.68E-05 | -0.84 | 5.33E-01 | M-1 |
| ENSMMUG00000001462  |          |                                                           | 4.59   | 1.35   | 0.17   | 0.09   | -1.84 | 3.00E-01 | -5.70 | 1.01E-03 | 2.06  | 5.29E-01 | M-1 |
| ENSMMUG00000041246  |          |                                                           | 0.63   | 5.53   | 0.22   | 0.64   | 2.41  | 1.55E-01 | -4.42 | 4.63E-03 | 2.31  | 4.01E-01 | M-1 |
| ENSMMUG00000043859  |          |                                                           | 3.63   | 1.62   | 0.39   | 0.42   | -1.37 | 2.89E-01 | -2.61 | 2.49E-02 | 0.18  | 9.66E-01 | M-1 |
| ENSMMUG00000011852  | BMPR1A   | Bone Morphogenetic Protein Receptor Type 1A               | 19.49  | 13.51  | 3.70   | 11.78  | -0.54 | 5.71E-01 | -2.44 | 8.72E-04 | 1.89  | 5.86E-02 | M-1 |
| ENSMMUG00000023612  | GRID1    | Glutamate Ionotropic Receptor Delta Type Subunit 1        | 2.06   | 1.22   | 0.10   | 0.03   | -1.65 | 2.18E-01 | -3.10 | 1.64E-02 | -3.43 | 5.42E-02 | M-1 |
| ENSMMUG00000008790  | ZMIZ1    | Zinc Finger MIZ-type Containing 1                         | 25.75  | 18.34  | 5.50   | 13.71  | -0.32 | 7.90E-01 | -2.39 | 3.60E-03 | 1.69  | 1.61E-01 | M-1 |
| ENSMMUG00000001821  | USP54    | Ubiquitin Specific Peptidase 54                           | 6.12   | 10.05  | 2.65   | 2.27   | 0.66  | 4.52E-01 | -2.83 | 4.93E-05 | 0.64  | 6.74E-01 | M-1 |
| ENSMMUG00000011281  | FAM149B1 | Family With Sequence Similarity 149 Member B1             | 2.08   | 3.13   | 0.84   | 1.84   | 0.95  | 4.95E-01 | -2.43 | 3.72E-02 | 1.90  | 2.82E-01 | M-1 |
| ENSMMUG00000020405  | PLA2G12B | Phospholipase A2 Group XIIB                               | 7.37   | 4.39   | 0.13   | 0.03   | -1.85 | 3.68E-01 | -5.95 | 1.92E-03 | -2.25 | 5.34E-01 | M-1 |
| ENSMMUG00000006395  | H2AFY2   | H2A Histone Family, Member Y2                             | 37.39  | 9.46   | 0.66   | 0.11   | -2.19 | 7.51E-02 | -3.94 | 7.80E-04 | -2.85 | 1.09E-01 | M-1 |
| ENSMMUG00000001006  | DDX50    | DEXD-box Helicase 50                                      | 17.33  | 17.81  | 4.23   | 4.03   | 0.00  | 9.98E-01 | -2.04 | 2.98E-02 | -0.26 | 9.26E-01 | M-1 |
| ENSMMUG00000000826  | STOX1    | Storkhead Box 1                                           | 3.67   | 1.79   | 0.29   | 1.78   | -1.43 | 3.96E-01 | -3.94 | 5.88E-03 | 2.17  | 3.50E-01 | M-1 |
| ENSMMUG00000016902  |          |                                                           | 3.11   | 2.92   | 2.34   | 0.34   | -0.64 | 7.56E-01 | -4.79 | 1.20E-03 | 2.36  | 3.46E-01 | M-1 |
| ENSMMUG00000000424  | ARID5B   | AT-rich Interaction Domain 5B                             | 0.88   | 0.55   | 0.26   | 0.15   | -0.81 | 7.08E-01 | -5.21 | 1.46E-03 | 0.36  | 9.49E-01 | M-1 |
| ENSMMUG00000003589  | ANK3     | Ankyrin 3                                                 | 3.81   | 2.62   | 0.67   | 1.67   | -0.35 | 8.19E-01 | -3.12 | 2.73E-03 | 1.77  | 2.82E-01 | M-1 |
| ENSMMUG00000018198  | CCDC6    | Coiled-coil Domain Containing 6                           | 182.72 | 179.40 | 40.79  | 22.93  | -0.21 | 8.30E-01 | -2.39 | 1.72E-04 | -0.15 | 9.47E-01 | M-1 |

|                     |         |                                                                         |        |        |       |       |       |          |       |          |       |          |     |
|---------------------|---------|-------------------------------------------------------------------------|--------|--------|-------|-------|-------|----------|-------|----------|-------|----------|-----|
| ENSMMUG00000003705  | PHYHIPL | Phytanoyl-CoA 2-hydroxylase Interacting Protein Like                    | 5.27   | 4.75   | 0.53  | 0.07  | -1.43 | 3.61E-01 | -3.52 | 8.65E-03 | -2.32 | 2.67E-01 | M-1 |
| ENSMMUG00000015750  | BICC1   | BicC Family RNA Binding Protein 1                                       | 28.46  | 7.05   | 1.38  | 0.19  | -2.23 | 6.87E-02 | -3.74 | 1.03E-03 | -1.12 | 6.41E-01 | M-1 |
| ENSMMUG00000009794  | PCDH15  | Protocadherin Related 15                                                | 1.75   | 1.15   | 0.11  | 0.02  | 0.14  | 9.45E-01 | -5.59 | 1.08E-05 | -0.12 | 9.81E-01 | M-1 |
| ENSMMUG00000007078  | ASAH2   | N-acylsphingosine Amidohydrolase 2                                      | 4.39   | 2.17   | 0.39  | 0.30  | -1.22 | 4.00E-01 | -4.45 | 3.95E-04 | 0.41  | 9.13E-01 | M-1 |
| ENSMMUG00000013485  | KIF20B  | Kinesin Family Member 20B                                               | 30.95  | 27.52  | 14.19 | 11.46 | -0.08 | 8.95E-01 | -1.14 | 5.58E-03 | -0.12 | 9.26E-01 | M-1 |
| ENSMMUG00000037671  |         |                                                                         | 0.36   | 2.49   | 0.03  | 0.06  | 0.80  | 8.07E-01 | -7.85 | 1.07E-03 | 3.22  | 4.59E-01 | M-1 |
| ENSMMUG0000001608   | PLCE1   | Phospholipase C Epsilon 1                                               | 115.37 | 103.56 | 8.09  | 1.45  | -0.31 | 7.93E-01 | -4.97 | 1.47E-10 | -0.48 | 8.15E-01 | M-1 |
| ENSMMUG00000045340  | CYP2C93 | Cytochrome P450 2C93                                                    | 52.39  | 35.00  | 4.43  | 0.21  | -1.23 | 3.04E-01 | -3.94 | 8.54E-05 | -2.17 | 1.76E-01 | M-1 |
| ENSMMUG00000008687  | BLNK    | B-cell Linker                                                           | 4.02   | 3.47   | 1.07  | 0.10  | -1.21 | 5.21E-01 | -6.13 | 2.40E-04 | -1.09 | 7.76E-01 | M-1 |
| ENSMMUG00000010357  | CNNM1   | Cyclin And CBS Domain Divalent Metal Cation Transport Mediator 1        | 1.22   | 0.45   | 0.04  | 0.03  | -1.07 | 5.71E-01 | -4.40 | 4.06E-03 | 1.07  | 7.68E-01 | M-1 |
| ENSMMUG00000023765  | DNMBP   | Dynamin Binding Protein                                                 | 16.98  | 10.51  | 1.67  | 6.00  | -1.32 | 1.15E-01 | -2.34 | 1.96E-03 | 1.40  | 2.28E-01 | M-1 |
| ENSMMUG00000018755  | CPN1    | Carboxypeptidase N Subunit 1                                            | 6.08   | 8.78   | 0.05  | 0.06  | 0.00  | 9.99E-01 | -6.51 | 7.56E-06 | 1.58  | 6.16E-01 | M-1 |
| ENSMMUG00000010679  | MRPL43  | Mitochondrial Ribosomal Protein L43                                     | 34.98  | 52.81  | 10.65 | 6.96  | 0.74  | 4.57E-01 | -2.38 | 3.04E-03 | -0.64 | 7.21E-01 | M-1 |
| ENSMMUG00000009375  | LDB1    | LIM Domain Binding 1                                                    | 40.58  | 38.78  | 14.03 | 21.17 | -0.19 | 8.93E-01 | -2.01 | 2.48E-02 | 1.74  | 1.77E-01 | M-1 |
| ENSMMUG00000001186  | PPRC1   | Peroxisome Proliferator-activated Receptor Gamma, Coactivator-related 1 | 79.24  | 81.09  | 15.81 | 11.26 | 0.21  | 7.71E-01 | -2.61 | 6.73E-08 | -0.52 | 6.05E-01 | M-1 |
| ENSMMUG00000008873  | PCGF6   | Polycomb Group Ring Finger 6                                            | 16.11  | 16.14  | 8.93  | 7.18  | 0.01  | 9.92E-01 | -1.14 | 3.05E-02 | 0.33  | 7.90E-01 | M-1 |
| ENSMMUG00000007064  | NEURL1  | Neuralized E3 Ubiquitin Protein Ligase 1                                | 1.08   | 0.99   | 0.30  | 0.08  | -0.10 | 9.64E-01 | -3.74 | 1.39E-02 | 0.75  | 8.51E-01 | M-1 |
| ENSMMUG00000015339  | CFAP58  | Cilia And Flagella Associated Protein 58                                | 14.20  | 17.14  | 2.82  | 0.29  | 0.14  | 9.15E-01 | -3.60 | 6.82E-06 | -1.77 | 1.49E-01 | M-1 |
| ENSMMUG00000000433  | SORCS1  | Sortilin Related VPS10 Domain Containing Receptor 1                     | 1.21   | 0.70   | 0.07  | 0.03  | -0.92 | 5.94E-01 | -3.25 | 1.95E-02 | -0.83 | 8.06E-01 | M-1 |
| ENSMMUG00000006233  | ADD3    | Adducin 3                                                               | 161.64 | 90.97  | 39.58 | 19.17 | -0.62 | 4.94E-01 | -2.38 | 8.51E-04 | 0.59  | 7.12E-01 | M-1 |
| ENSMMUG00000016644  | DCLRE1A | DNA Cross-link Repair 1A                                                | 30.72  | 8.39   | 2.65  | 4.37  | -1.76 | 8.62E-02 | -2.51 | 8.59E-03 | 1.04  | 5.67E-01 | M-1 |
| ENSMMUG00000016646  | NHLRC2  | NHL Repeat Containing 2                                                 | 12.91  | 6.28   | 2.12  | 7.29  | -1.00 | 2.79E-01 | -2.07 | 1.05E-02 | 0.93  | 5.35E-01 | M-1 |
| ENSMMUG000000022517 | TDRD1   | Tudor Domain Containing 1                                               | 12.01  | 13.29  | 2.81  | 0.87  | -0.14 | 9.17E-01 | -3.89 | 4.04E-06 | -0.20 | 9.49E-01 | M-1 |
| ENSMMUG00000047544  |         |                                                                         | 55.42  | 28.17  | 1.55  | 0.67  | -0.97 | 5.60E-01 | -6.96 | 7.37E-07 | -0.07 | 9.89E-01 | M-1 |
| ENSMMUG000000022523 | AFAP1L2 | Actin Filament Associated Protein 1 Like 2                              | 34.78  | 24.82  | 1.20  | 0.40  | -0.67 | 6.39E-01 | -5.76 | 2.65E-08 | -0.45 | 8.86E-01 | M-1 |
| ENSMMUG00000045995  |         |                                                                         | 1.34   | 0.87   | 0.47  | 0.01  | 0.32  | 9.21E-01 | -4.87 | 3.20E-02 | -0.81 | 9.02E-01 | M-1 |
| ENSMMUG00000001905  | ATRNL1  | Attractin Like 1                                                        | 2.64   | 6.26   | 1.87  | 0.96  | 1.06  | 3.98E-01 | -3.15 | 2.40E-03 | -1.52 | 3.98E-01 | M-1 |
| ENSMMUG00000016370  | CACUL1  | CDK2 Associated Cullin Domain 1                                         | 59.45  | 31.65  | 16.99 | 11.00 | -0.85 | 3.13E-01 | -1.55 | 3.87E-02 | 0.82  | 5.44E-01 | M-1 |
| ENSMMUG00000009558  | INPP5F  | Inositol Polyphosphate-5-phosphatase F                                  | 38.83  | 37.34  | 11.34 | 14.42 | -0.04 | 9.73E-01 | -2.37 | 1.40E-04 | 1.18  | 2.27E-01 | M-1 |
| ENSMMUG00000008724  | PLPP4   | Phospholipid Phosphatase 4                                              | 18.67  | 6.28   | 0.18  | 0.17  | -2.27 | 1.98E-01 | -6.68 | 4.37E-05 | 1.82  | 5.77E-01 | M-1 |
| ENSMMUG00000021594  | ATE1    | Arginyltransferase 1                                                    | 6.44   | 16.62  | 5.33  | 4.88  | 1.21  | 5.68E-02 | -1.66 | 5.37E-03 | 0.15  | 9.37E-01 | M-1 |
| ENSMMUG00000000684  | ACADSB  | Acyl-CoA Dehydrogenase Short/branched Chain                             | 4.45   | 6.06   | 0.89  | 2.83  | 0.02  | 9.89E-01 | -2.33 | 3.12E-02 | 1.60  | 3.52E-01 | M-1 |
| ENSMMUG00000010115  | CHST15  | Carbohydrate Sulfotransferase 15                                        | 12.07  | 14.99  | 2.06  | 1.35  | 0.36  | 7.01E-01 | -3.24 | 8.41E-07 | 0.26  | 8.95E-01 | M-1 |
| ENSMMUG00000008535  | EDRF1   | Erythroid Differentiation Regulatory Factor 1                           | 122.40 | 77.54  | 16.95 | 4.83  | -0.86 | 3.49E-01 | -3.51 | 2.09E-06 | -0.75 | 6.33E-01 | M-1 |
| ENSMMUG00000008542  | DHX32   | DEAH-box Helicase 32 (putative)                                         | 31.70  | 13.84  | 4.30  | 6.39  | -1.22 | 1.63E-01 | -1.66 | 4.14E-02 | 0.39  | 8.51E-01 | M-1 |
| ENSMMUG00000018547  | DOCK1   | Dedicator Of Cytokinesis 1                                              | 21.30  | 16.32  | 4.74  | 8.75  | -0.35 | 6.75E-01 | -2.09 | 5.53E-04 | 1.08  | 2.64E-01 | M-1 |
| ENSMMUG00000022358  | JAKMIP3 | Janus Kinase And Microtubule Interacting Protein 3                      | 0.81   | 0.61   | 0.06  | 0.04  | -0.43 | 8.62E-01 | -6.19 | 3.20E-04 | 2.17  | 5.07E-01 | M-1 |

|                    |             |                                                          |        |        |       |       |       |          |       |          |       |          |     |
|--------------------|-------------|----------------------------------------------------------|--------|--------|-------|-------|-------|----------|-------|----------|-------|----------|-----|
| ENSMMUG00000022364 | STK32C      | Serine/threonine Kinase 32C                              | 7.29   | 7.52   | 0.40  | 0.08  | -1.01 | 6.37E-01 | -4.10 | 1.64E-02 | -0.75 | 8.79E-01 | M-1 |
| ENSMMUG00000004012 | PHRF1       | PHD And Ring Finger Domains 1                            | 11.07  | 22.39  | 4.86  | 3.11  | 1.05  | 2.35E-01 | -2.69 | 3.44E-04 | -0.45 | 8.13E-01 | M-1 |
| ENSMMUG00000007510 | TALDO1      | Transaldolase 1                                          | 28.36  | 34.96  | 24.73 | 63.40 | 0.61  | 5.17E-01 | -1.69 | 2.90E-02 | 1.62  | 1.32E-01 | M-1 |
| ENSMMUG00000043846 |             |                                                          | 5.35   | 9.48   | 0.23  | 0.14  | 1.06  | 5.31E-01 | -5.41 | 3.41E-05 | -0.64 | 8.59E-01 | M-1 |
| ENSMMUG00000010544 |             |                                                          | 0.15   | 4.02   | 0.14  | 0.07  | 3.20  | 1.02E-01 | -4.71 | 9.29E-03 | 0.10  | 9.88E-01 | M-1 |
| ENSMMUG00000023132 | DUSP8       | Dual Specificity Phosphatase 8                           | 8.59   | 6.05   | 2.51  | 0.38  | -0.44 | 8.48E-01 | -3.56 | 2.47E-02 | -2.19 | 4.21E-01 | M-1 |
| ENSMMUG00000047449 | IGF2        | Insulin Like Growth Factor 2                             | 3.24   | 17.35  | 0.72  | 2.11  | 1.20  | 4.39E-01 | -5.23 | 2.68E-05 | 1.21  | 6.47E-01 | M-1 |
| ENSMMUG00000007742 |             |                                                          | 7.01   | 3.86   | 0.20  | 0.10  | -0.36 | 8.68E-01 | -4.80 | 7.55E-04 | -0.35 | 9.46E-01 | M-1 |
| ENSMMUG00000019736 | SHANK2      | SH3 And Multiple Ankyrin Repeat Domains 2                | 2.44   | 1.76   | 0.23  | 0.87  | -0.78 | 5.96E-01 | -3.65 | 1.54E-03 | 2.03  | 2.62E-01 | M-1 |
| ENSMMUG00000011817 | AIP         | Aryl Hydrocarbon Receptor Interacting Protein            | 1.13   | 2.63   | 0.27  | 0.27  | 1.59  | 2.77E-01 | -3.88 | 2.56E-03 | -0.71 | 8.36E-01 | M-1 |
| ENSMMUG00000010577 |             |                                                          | 30.73  | 35.96  | 8.79  | 5.55  | -0.13 | 9.15E-01 | -1.73 | 2.90E-02 | -1.30 | 2.84E-01 | M-1 |
| ENSMMUG00000020363 | LOC713490   | RNA-binding Protein 4                                    | 29.24  | 53.70  | 21.08 | 17.20 | 0.96  | 2.15E-01 | -1.78 | 9.97E-03 | -0.47 | 7.68E-01 | M-1 |
| ENSMMUG00000022518 |             |                                                          | 13.85  | 10.99  | 2.39  | 5.96  | 0.08  | 9.61E-01 | -3.25 | 7.68E-04 | 1.79  | 2.33E-01 | M-1 |
| ENSMMUG00000011743 | LOC714747   | Splicing Factor 3B Subunit 2                             | 29.83  | 55.86  | 28.16 | 22.89 | 1.01  | 6.31E-02 | -1.08 | 4.18E-02 | -0.44 | 6.88E-01 | M-1 |
| ENSMMUG00000031183 | FAM89B      | Family With Sequence Similarity 89 Member B              | 7.30   | 14.75  | 3.17  | 2.13  | 0.61  | 6.89E-01 | -3.38 | 2.89E-03 | 0.47  | 8.86E-01 | M-1 |
| ENSMMUG00000023479 | LTBP3       | Latent Transforming Growth Factor Beta Binding Protein 3 | 1.18   | 0.53   | 0.05  | 0.13  | -2.26 | 1.57E-01 | -3.60 | 2.03E-02 | 0.99  | 7.92E-01 | M-1 |
| ENSMMUG00000013475 | CAPN1       | Calpain 1                                                | 8.87   | 6.97   | 2.62  | 9.22  | -0.24 | 8.91E-01 | -2.93 | 9.94E-03 | 1.97  | 2.58E-01 | M-1 |
| ENSMMUG00000020105 | SPDYC       | Speedy/RINGO Cell Cycle Regulator Family Member C        | 48.24  | 49.74  | 1.96  | 1.34  | -0.28 | 8.25E-01 | -5.27 | 1.46E-10 | 1.01  | 5.50E-01 | M-1 |
| ENSMMUG00000018781 | SYVN1       | Synoviolin 1                                             | 25.18  | 42.37  | 11.39 | 8.68  | -0.04 | 9.73E-01 | -2.09 | 5.44E-03 | -0.43 | 8.18E-01 | M-1 |
| ENSMMUG00000018773 | TM7SF2      | Transmembrane 7 Superfamily Member 2                     | 1.03   | 1.87   | 0.72  | 0.19  | 1.33  | 5.91E-01 | -4.46 | 2.91E-02 | -0.57 | 9.27E-01 | M-1 |
| ENSMMUG00000031160 | MEN1        | Menin 1                                                  | 13.87  | 13.73  | 3.24  | 6.78  | 0.06  | 9.73E-01 | -2.31 | 3.49E-02 | 0.91  | 6.89E-01 | M-1 |
| ENSMMUG00000022604 | PYGM        | Glycogen Phosphorylase, Muscle Associated                | 4.39   | 2.57   | 0.59  | 0.04  | -0.85 | 6.32E-01 | -3.88 | 5.97E-03 | -3.33 | 1.24E-01 | M-1 |
| ENSMMUG00000012942 | DNAJC4      | DnaJ Heat Shock Protein Family (Hsp40) Member C4         | 1.53   | 8.92   | 0.72  | 1.24  | 2.25  | 2.98E-01 | -4.54 | 1.76E-02 | 1.05  | 8.26E-01 | M-1 |
| ENSMMUG00000018152 | C14H11orf84 | Chromosome 14 Open Reading Frame, Human C11orf84         | 25.26  | 12.46  | 0.82  | 0.40  | -1.67 | 1.69E-01 | -3.70 | 6.40E-04 | -1.40 | 4.88E-01 | M-1 |
| ENSMMUG00000007544 | TROAP       | Trophinin Associated Protein                             | 43.49  | 25.85  | 5.09  | 6.55  | -0.63 | 4.91E-01 | -2.39 | 1.07E-03 | 0.48  | 7.85E-01 | M-1 |
| ENSMMUG00000000188 | NXF1        | Nuclear RNA Export Factor 1                              | 35.05  | 77.30  | 33.66 | 26.81 | 1.03  | 8.56E-02 | -1.30 | 2.18E-02 | -0.33 | 8.05E-01 | M-1 |
| ENSMMUG00000039671 | TTC9C       | Tetratricopeptide Repeat Domain 9C                       | 3.87   | 10.40  | 3.77  | 3.32  | 1.32  | 5.54E-02 | -1.65 | 1.18E-02 | -0.47 | 7.53E-01 | M-1 |
| ENSMMUG00000004420 | INCENP      | Inner Centromere Protein                                 | 16.70  | 13.51  | 7.33  | 6.75  | 0.32  | 7.32E-01 | -1.87 | 5.59E-03 | 0.16  | 9.47E-01 | M-1 |
| ENSMMUG00000000327 | FADS2       | Fatty Acid Desaturase 2                                  | 3.04   | 1.54   | 0.08  | 0.08  | -0.80 | 6.68E-01 | -3.50 | 1.80E-02 | -1.43 | 6.50E-01 | M-1 |
| ENSMMUG00000013798 | FADS1       | Fatty Acid Desaturase 1                                  | 25.66  | 13.44  | 3.30  | 1.26  | -1.12 | 3.43E-01 | -3.16 | 1.46E-03 | -0.18 | 9.63E-01 | M-1 |
| ENSMMUG00000048768 |             |                                                          | 17.04  | 14.84  | 0.60  | 1.92  | -0.54 | 7.87E-01 | -6.58 | 2.51E-05 | 3.24  | 1.51E-01 | M-1 |
| ENSMMUG00000014531 | TMEM109     | Transmembrane Protein 109                                | 61.25  | 44.84  | 6.03  | 6.33  | -0.48 | 6.91E-01 | -2.86 | 1.18E-03 | -1.20 | 4.45E-01 | M-1 |
| ENSMMUG00000014530 | PRPF19      | Pre-mRNA Processing Factor 19                            | 32.02  | 42.96  | 18.62 | 21.30 | 0.29  | 6.75E-01 | -1.14 | 3.19E-02 | -0.01 | 9.97E-01 | M-1 |
| ENSMMUG00000000017 |             |                                                          | 5.70   | 0.94   | 1.91  | 0.07  | -1.94 | 4.69E-01 | -7.09 | 2.39E-03 | 1.72  | 7.53E-01 | M-1 |
| ENSMMUG00000046674 |             |                                                          | 353.17 | 300.94 | 25.22 | 3.02  | -0.71 | 5.46E-01 | -4.02 | 5.76E-06 | -2.28 | 7.15E-02 | M-1 |
| ENSMMUG00000046488 |             |                                                          | 577.34 | 250.67 | 86.72 | 5.29  | -1.54 | 1.29E-01 | -3.24 | 3.22E-04 | -1.92 | 1.57E-01 | M-1 |
| ENSMMUG00000045461 |             |                                                          | 1.44   | 3.67   | 0.02  | 0.07  | -0.14 | 9.59E-01 | -6.97 | 6.77E-05 | 4.36  | 8.88E-02 | M-1 |
| ENSMMUG00000022319 | STX3        | Syntaxin 3                                               | 7.63   | 6.25   | 3.36  | 4.69  | -0.34 | 6.98E-01 | -1.32 | 4.81E-02 | 0.83  | 4.68E-01 | M-1 |
| ENSMMUG00000010274 | FAM111A     | Family With Sequence Similarity 111 Member A             | 13.03  | 10.98  | 1.16  | 0.61  | 0.30  | 8.02E-01 | -4.78 | 8.78E-10 | 0.08  | 9.79E-01 | M-1 |
| ENSMMUG00000001083 | LOC701547   | Glycine N-acyltransferase-like Protein 1                 | 1.29   | 0.59   | 0.13  | 0.02  | -2.58 | 1.76E-01 | -3.61 | 4.83E-02 | 0.05  | 9.94E-01 | M-1 |
| ENSMMUG00000011714 | ZFP91       | ZFP91 Zinc Finger Protein                                | 15.92  | 17.29  | 7.94  | 3.56  | 0.02  | 9.85E-01 | -1.73 | 1.99E-04 | -0.62 | 4.67E-01 | M-1 |

|                    |             |                                                              |       |       |       |       |       |          |       |          |       |          |     |
|--------------------|-------------|--------------------------------------------------------------|-------|-------|-------|-------|-------|----------|-------|----------|-------|----------|-----|
| ENSMMUG00000002563 | ZDHC5       | Zinc Finger DHHC-type Containing 5                           | 23.26 | 38.36 | 17.30 | 12.70 | 1.07  | 1.36E-01 | -1.63 | 1.33E-02 | -0.14 | 9.51E-01 | M-1 |
| ENSMMUG00000012618 | SERPING1    | Serpin Family G Member 1                                     | 4.08  | 6.89  | 0.11  | 0.82  | 0.15  | 9.44E-01 | -4.79 | 2.34E-04 | 2.21  | 3.09E-01 | M-1 |
| ENSMMUG00000001332 | UBE2L6      | Ubiquitin Conjugating Enzyme E2 L6                           | 5.88  | 23.29 | 0.14  | 0.02  | 0.94  | 6.22E-01 | -7.79 | 1.11E-07 | -0.78 | 8.63E-01 | M-1 |
| ENSMMUG00000010601 | SLC43A3     | Solute Carrier Family 43 Member 3                            | 75.51 | 40.27 | 6.24  | 1.10  | -0.86 | 4.68E-01 | -3.90 | 2.88E-05 | -1.54 | 3.26E-01 | M-1 |
| ENSMMUG00000012881 | AGBL2       | ATP/GTP Binding Protein Like 2                               | 4.69  | 8.86  | 0.24  | 0.71  | 0.75  | 6.34E-01 | -5.12 | 1.06E-05 | 2.29  | 2.19E-01 | M-1 |
| ENSMMUG00000015602 | MADD        | MAP Kinase Activating Death Domain                           | 11.74 | 15.51 | 3.56  | 2.77  | -0.28 | 8.44E-01 | -2.00 | 4.05E-02 | -0.21 | 9.50E-01 | M-1 |
| ENSMMUG00000022964 | DDB2        | Damage Specific DNA Binding Protein 2                        | 19.48 | 24.22 | 10.63 | 4.63  | -0.20 | 9.17E-01 | -2.66 | 3.40E-02 | 0.17  | 9.69E-01 | M-1 |
| ENSMMUG00000019674 | F2          | Coagulation Factor II, Thrombin                              | 7.72  | 3.06  | 0.26  | 0.16  | -2.74 | 7.49E-02 | -5.90 | 2.49E-04 | 1.35  | 6.92E-01 | M-1 |
| ENSMMUG00000011526 | AMBRA1      | Autophagy And Beclin 1 Regulator 1                           | 31.04 | 24.22 | 6.83  | 2.81  | -0.52 | 6.54E-01 | -1.97 | 2.73E-02 | -1.70 | 1.89E-01 | M-1 |
| ENSMMUG00000002617 | PHF21A      | PHD Finger Protein 21A                                       | 17.16 | 22.69 | 4.03  | 2.71  | 0.27  | 8.21E-01 | -3.13 | 7.20E-05 | -0.59 | 7.51E-01 | M-1 |
| ENSMMUG00000002452 | SLC35C1     | Solute Carrier Family 35 Member C1                           | 7.68  | 6.36  | 1.81  | 2.94  | -0.08 | 9.61E-01 | -2.88 | 6.59E-03 | 0.62  | 8.11E-01 | M-1 |
| ENSMMUG00000031040 | TP5311      | Tumor Protein P53 Inducible Protein 11                       | 7.26  | 6.39  | 1.77  | 0.26  | -1.02 | 4.69E-01 | -4.75 | 3.35E-05 | -0.22 | 9.59E-01 | M-1 |
| ENSMMUG00000018269 | C14H11orf74 | Chromosome 14 C11orf74 Homolog                               | 5.29  | 3.78  | 1.58  | 0.62  | -0.35 | 7.95E-01 | -2.10 | 2.81E-02 | -0.14 | 9.68E-01 | M-1 |
| ENSMMUG00000018265 | PRR5L       | Proline Rich 5 Like                                          | 36.96 | 9.83  | 1.35  | 0.23  | -1.82 | 5.95E-02 | -4.64 | 1.97E-07 | -1.85 | 2.09E-01 | M-1 |
| ENSMMUG00000007093 | LDLRAD3     | Low Density Lipoprotein Receptor Class A Domain Containing 3 | 12.00 | 4.26  | 1.51  | 0.46  | -1.37 | 1.48E-01 | -2.22 | 1.07E-02 | -0.96 | 5.60E-01 | M-1 |
| ENSMMUG00000002429 | CAT         | Catalase                                                     | 1.87  | 0.97  | 0.09  | 0.15  | -1.56 | 2.59E-01 | -3.71 | 2.40E-03 | 0.19  | 9.67E-01 | M-1 |
| ENSMMUG00000007633 | LMO2        | LIM Domain Only 2                                            | 1.43  | 3.22  | 0.14  | 1.43  | -1.09 | 6.18E-01 | -4.40 | 1.61E-02 | 3.52  | 1.86E-01 | M-1 |
| ENSMMUG00000017218 | KIAA1549L   | KIAA1549 Like                                                | 17.09 | 24.48 | 1.42  | 0.34  | 0.19  | 9.15E-01 | -5.77 | 6.23E-08 | -0.25 | 9.49E-01 | M-1 |
| ENSMMUG00000009028 | CCDC73      | Coiled-coil Domain Containing 73                             | 26.81 | 27.36 | 12.40 | 2.38  | -0.08 | 9.40E-01 | -1.65 | 1.89E-02 | -1.25 | 2.39E-01 | M-1 |
| ENSMMUG00000009055 | NELL1       | Neural EGFL Like 1                                           | 9.04  | 4.45  | 1.14  | 0.47  | -1.91 | 1.25E-01 | -2.77 | 1.81E-02 | -1.07 | 6.55E-01 | M-1 |
| ENSMMUG00000016942 | NAV2        | Neuron Navigator 2                                           | 20.33 | 16.25 | 0.66  | 1.96  | -0.07 | 9.61E-01 | -6.14 | 2.87E-13 | 1.48  | 3.03E-01 | M-1 |
| ENSMMUG00000017628 | PLEKHA7     | Pleckstrin Homology Domain Containing A7                     | 13.68 | 17.33 | 0.95  | 4.19  | 0.75  | 5.86E-01 | -5.09 | 6.42E-07 | 2.58  | 8.01E-02 | M-1 |
| ENSMMUG00000000761 | CYP2R1      | Cytochrome P450, Family 2, Subfamily R, Polypeptide 1        | 26.45 | 11.78 | 6.64  | 0.43  | -1.28 | 3.18E-01 | -3.44 | 1.66E-03 | -1.45 | 4.73E-01 | M-1 |
| ENSMMUG00000021914 | SPON1       | Spondin 1                                                    | 8.68  | 3.48  | 0.18  | 0.09  | -1.12 | 4.90E-01 | -3.84 | 4.94E-03 | -1.80 | 4.80E-01 | M-1 |
| ENSMMUG00000006652 | ZBED5       | Zinc Finger BED-type Containing 5                            | 1.96  | 9.16  | 2.48  | 6.63  | 2.22  | 6.21E-02 | -2.38 | 4.02E-02 | 1.77  | 3.27E-01 | M-1 |
| ENSMMUG00000015792 | MRVI1       | Murine Retrovirus Integration Site 1 Homolog                 | 10.82 | 11.81 | 0.29  | 0.30  | -0.68 | 4.03E-01 | -5.73 | 9.73E-20 | 0.27  | 8.91E-01 | M-1 |
| ENSMMUG00000009205 | SBF2        | SET Binding Factor 2                                         | 21.37 | 13.94 | 3.13  | 5.47  | -0.66 | 4.70E-01 | -2.45 | 8.65E-04 | 1.51  | 1.71E-01 | M-1 |
| ENSMMUG00000006689 | NRIP3       | Nuclear Receptor Interacting Protein 3                       | 11.18 | 5.31  | 0.15  | 0.10  | -1.29 | 3.43E-01 | -7.80 | 1.23E-09 | 2.05  | 3.54E-01 | M-1 |
| ENSMMUG00000021830 | ST5         | Suppression Of Tumorigenicity 5                              | 10.56 | 7.93  | 0.64  | 1.02  | -0.13 | 9.28E-01 | -5.63 | 1.01E-10 | 1.99  | 1.31E-01 | M-1 |
| ENSMMUG00000018471 | STK33       | Serine/threonine Kinase 33                                   | 1.49  | 2.02  | 0.17  | 0.08  | 0.31  | 8.76E-01 | -6.23 | 4.92E-06 | 1.07  | 7.32E-01 | M-1 |
| ENSMMUG00000038771 | OLFML1      | Olfactomedin Like 1                                          | 1.78  | 1.90  | 0.09  | 0.09  | -0.50 | 8.26E-01 | -6.22 | 8.61E-05 | 1.84  | 5.38E-01 | M-1 |
| ENSMMUG00000009264 | ZNF215      | Zinc Finger Protein 215                                      | 37.26 | 20.19 | 6.83  | 5.62  | -0.72 | 4.92E-01 | -2.34 | 6.20E-03 | 0.42  | 8.51E-01 | M-1 |
| ENSMMUG00000007738 | RRP8        | Ribosomal RNA Processing 8                                   | 7.59  | 36.36 | 10.54 | 7.03  | 2.02  | 6.51E-02 | -2.13 | 4.52E-02 | 0.22  | 9.51E-01 | M-1 |
| ENSMMUG00000004974 | TRIM21      | Tripartite Motif Containing 21                               | 4.13  | 2.50  | 5.71  | 0.71  | -0.47 | 8.20E-01 | -3.20 | 2.86E-02 | 0.03  | 9.97E-01 | M-1 |
| ENSMMUG00000003950 | NUP98       | Nucleoporin 98                                               | 21.81 | 23.49 | 14.45 | 13.49 | 0.09  | 8.74E-01 | -0.89 | 1.61E-02 | -0.04 | 9.78E-01 | M-1 |
| ENSMMUG00000010321 | C2CD3       | C2 Calcium Dependent Domain Containing 3                     | 6.82  | 13.26 | 3.49  | 2.91  | 1.09  | 2.03E-01 | -2.62 | 3.79E-04 | 0.71  | 6.50E-01 | M-1 |
| ENSMMUG00000045542 |             |                                                              | 55.79 | 25.20 | 13.85 | 16.50 | -1.26 | 3.41E-01 | -3.82 | 6.59E-04 | 2.87  | 5.71E-02 | M-1 |
| ENSMMUG00000017402 | PGM2L1      | Phosphoglucomutase 2 Like 1                                  | 2.77  | 4.10  | 0.41  | 1.41  | 0.38  | 8.39E-01 | -4.48 | 2.59E-04 | 3.22  | 5.45E-02 | M-1 |
| ENSMMUG00000020643 | POLD3       | DNA Polymerase Delta 3, Accessory Subunit                    | 92.44 | 84.67 | 20.40 | 10.17 | -0.39 | 7.19E-01 | -3.51 | 2.82E-06 | 0.83  | 5.89E-01 | M-1 |

|                     |             |                                                                   |        |        |       |       |       |          |       |          |       |          |     |
|---------------------|-------------|-------------------------------------------------------------------|--------|--------|-------|-------|-------|----------|-------|----------|-------|----------|-----|
| ENSMMUG00000048604  | THAP12      | THAP Domain Containing 12                                         | 34.54  | 42.65  | 26.13 | 18.73 | 0.05  | 9.42E-01 | -1.07 | 1.72E-02 | 0.16  | 9.01E-01 | M-1 |
| ENSMMUG00000041609  |             |                                                                   | 5.83   | 7.89   | 0.17  | 0.05  | 0.02  | 9.95E-01 | -5.68 | 1.03E-02 | -1.34 | 8.06E-01 | M-1 |
| ENSMMUG00000018188  | GDPD4       | Glycerophosphodiester Phosphodiesterase Domain Containing 4       | 27.13  | 35.90  | 2.75  | 0.12  | 0.21  | 9.15E-01 | -6.18 | 3.14E-07 | -1.09 | 6.97E-01 | M-1 |
| ENSMMUG00000001387  | PAK1        | P21 (RAC1) Activated Kinase 1                                     | 18.00  | 8.35   | 0.92  | 4.22  | -0.93 | 4.34E-01 | -3.53 | 2.42E-04 | 2.02  | 1.69E-01 | M-1 |
| ENSMMUG000000017473 | KCTD21      | Potassium Channel Tetramerization Domain Containing 21            | 4.48   | 6.26   | 0.58  | 1.93  | 0.78  | 5.70E-01 | -3.57 | 8.48E-04 | 1.40  | 4.71E-01 | M-1 |
| ENSMMUG000000017477 | GAB2        | GRB2 Associated Binding Protein 2                                 | 81.10  | 68.89  | 12.26 | 11.53 | -0.55 | 4.75E-01 | -3.56 | 9.37E-10 | 0.88  | 4.07E-01 | M-1 |
| ENSMMUG00000005031  | ANKRD42     | Ankyrin Repeat Domain 42                                          | 7.13   | 8.02   | 2.80  | 3.37  | -0.06 | 9.63E-01 | -1.94 | 3.10E-02 | 0.73  | 6.99E-01 | M-1 |
| ENSMMUG00000007921  | DLG2        | Discs Large MAGUK Scaffold Protein 2                              | 1.66   | 0.90   | 0.81  | 0.02  | -1.29 | 3.61E-01 | -5.56 | 1.42E-05 | 0.40  | 9.26E-01 | M-1 |
| ENSMMUG000000012449 | SYTL2       | Synaptotagmin Like 2                                              | 45.28  | 26.92  | 5.53  | 3.87  | -0.88 | 3.25E-01 | -3.29 | 5.51E-06 | 1.08  | 4.08E-01 | M-1 |
| ENSMMUG000000048340 | TRIM77      | Tripartite Motif Containing 77                                    | 376.88 | 478.71 | 63.55 | 3.17  | -0.18 | 9.14E-01 | -5.22 | 1.37E-07 | -0.99 | 6.43E-01 | M-1 |
| ENSMMUG000000030952 | LOC706715   | Tripartite Motif-containing Protein 51                            | 10.34  | 30.20  | 1.92  | 0.54  | 0.24  | 9.04E-01 | -5.65 | 5.34E-06 | -0.07 | 9.89E-01 | M-1 |
| ENSMMUG000000023800 | LOC693283   | Putative Tripartite Motif-containing Protein 49B                  | 0.96   | 15.30  | 1.16  | 0.51  | 3.36  | 6.12E-02 | -7.88 | 2.52E-06 | 3.44  | 1.73E-01 | M-1 |
| ENSMMUG000000010216 | LOC693908   | Tripartite Motif-containing Protein 49D                           | 0.92   | 27.27  | 1.28  | 0.56  | 2.38  | 1.55E-01 | -5.88 | 8.43E-05 | 0.61  | 8.88E-01 | M-1 |
| ENSMMUG000000040519 | SMCO4       | Single-pass Membrane Protein With Coiled-coil Domains 4           | 0.51   | 3.28   | 1.01  | 1.82  | 2.11  | 2.33E-01 | -3.83 | 1.52E-02 | 2.91  | 2.14E-01 | M-1 |
| ENSMMUG000000008025 | CEP295      | Centrosomal Protein 295                                           | 59.38  | 60.24  | 19.35 | 12.38 | -0.15 | 8.75E-01 | -2.08 | 5.02E-04 | 0.22  | 9.02E-01 | M-1 |
| ENSMMUG000000011649 | C14H11orf54 | Chromosome 14 Open Reading Frame, Human C11orf54                  | 7.21   | 2.58   | 0.63  | 1.03  | -1.14 | 4.30E-01 | -3.66 | 2.71E-03 | 1.37  | 5.57E-01 | M-1 |
| ENSMMUG000000044913 |             |                                                                   | 0.79   | 2.89   | 0.08  | 0.22  | 2.17  | 6.09E-01 | -8.21 | 1.66E-02 | 7.73  | 1.03E-01 | M-1 |
| ENSMMUG000000040247 | IZUMO1R     | IZUMO1 Receptor, JUNO                                             | 36.86  | 8.46   | 1.55  | 0.28  | -2.71 | 5.11E-02 | -3.88 | 4.31E-03 | -1.94 | 4.48E-01 | M-1 |
| ENSMMUG000000004112 | MRE11       | MRE11 Homolog, Double Strand Break Repair Nuclease                | 37.44  | 21.54  | 7.12  | 15.28 | -0.86 | 2.41E-01 | -1.51 | 2.04E-02 | 1.15  | 2.39E-01 | M-1 |
| ENSMMUG000000001730 | AMOTL1      | Angiomotin Like 1                                                 | 2.96   | 1.52   | 0.29  | 0.97  | -1.04 | 3.79E-01 | -3.69 | 2.40E-04 | 2.18  | 1.37E-01 | M-1 |
| ENSMMUG000000014796 | CEP57       | Centrosomal Protein 57                                            | 41.71  | 35.72  | 22.65 | 12.37 | 0.07  | 9.28E-01 | -1.31 | 3.73E-03 | -0.45 | 6.26E-01 | M-1 |
| ENSMMUG000000014801 | MTMR2       | Myotubularin Related Protein 2                                    | 83.75  | 52.20  | 10.19 | 11.04 | -1.01 | 2.27E-01 | -3.31 | 2.48E-06 | 1.00  | 4.38E-01 | M-1 |
| ENSMMUG000000014806 | MAML2       | Mastermind Like Transcriptional Coactivator 2                     | 2.57   | 5.31   | 0.31  | 0.06  | 1.05  | 5.33E-01 | -6.26 | 1.63E-06 | -1.56 | 5.59E-01 | M-1 |
| ENSMMUG000000011835 | TRPC6       | Transient Receptor Potential Cation Channel Subfamily C Member 6  | 1.58   | 0.59   | 0.01  | 0.04  | -2.22 | 3.62E-01 | -7.14 | 1.10E-03 | 2.70  | 5.05E-01 | M-1 |
| ENSMMUG000000003396 | YAP1        | Yes Associated Protein 1                                          | 43.74  | 69.06  | 21.91 | 26.81 | 1.07  | 2.16E-01 | -1.91 | 1.32E-02 | 0.21  | 9.31E-01 | M-1 |
| ENSMMUG000000014415 | DDX10       | DEAD-box Helicase 10                                              | 118.01 | 64.86  | 23.40 | 12.56 | -1.00 | 5.84E-02 | -2.13 | 6.67E-06 | -0.03 | 9.89E-01 | M-1 |
| ENSMMUG000000000527 | ARHGAP20    | Rho GTPase Activating Protein 20                                  | 12.88  | 6.98   | 0.45  | 0.05  | -0.97 | 4.49E-01 | -5.84 | 8.92E-09 | -1.56 | 4.19E-01 | M-1 |
| ENSMMUG000000021438 | BTG4        | BTG Anti-proliferation Factor 4                                   | 122.27 | 53.49  | 9.08  | 0.49  | -1.61 | 1.03E-01 | -4.09 | 2.62E-06 | -1.84 | 1.79E-01 | M-1 |
| ENSMMUG000000004688 | NCAM1       | Neural Cell Adhesion Molecule 1                                   | 0.49   | 0.99   | 0.08  | 0.73  | -0.90 | 6.41E-01 | -4.64 | 2.50E-03 | 3.28  | 1.25E-01 | M-1 |
| ENSMMUG000000014334 | DRD2        | Dopamine Receptor D2                                              | 4.63   | 6.05   | 0.06  | 0.05  | -0.05 | 9.80E-01 | -6.04 | 1.36E-06 | -0.61 | 8.68E-01 | M-1 |
| ENSMMUG000000012271 | C14H11orf71 | Chromosome 14 Open Reading Frame, Human C11orf71                  | 2.78   | 16.63  | 2.13  | 1.65  | 2.37  | 1.16E-01 | -3.44 | 1.61E-02 | -0.70 | 8.51E-01 | M-1 |
| ENSMMUG000000046770 |             |                                                                   | 1.64   | 6.80   | 0.55  | 0.11  | 2.05  | 2.13E-01 | -4.88 | 9.95E-04 | -0.21 | 9.72E-01 | M-1 |
| ENSMMUG000000016128 | SIK3        | SIK Family Kinase 3                                               | 4.14   | 4.60   | 1.10  | 1.57  | 0.19  | 8.85E-01 | -2.94 | 2.52E-04 | 0.53  | 7.89E-01 | M-1 |
| ENSMMUG000000002050 | PAFAH1B2    | Platelet Activating Factor Acetylhydrolase 1b Catalytic Subunit 2 | 35.67  | 55.67  | 18.22 | 13.70 | 0.61  | 4.00E-01 | -1.78 | 3.18E-03 | 0.21  | 9.03E-01 | M-1 |



|                     |              |                                                      |        |        |       |       |       |          |       |          |       |          |     |
|---------------------|--------------|------------------------------------------------------|--------|--------|-------|-------|-------|----------|-------|----------|-------|----------|-----|
| ENSMMUG00000002053  | SIDT2        | SID1 Transmembrane Family Member 2                   | 11.97  | 11.80  | 3.48  | 1.69  | 0.00  | 9.99E-01 | -2.24 | 4.40E-02 | -0.64 | 8.05E-01 | M-1 |
| ENSMMUG00000007791  | CEP164       | Centrosomal Protein 164                              | 2.82   | 4.01   | 0.71  | 1.75  | 0.62  | 6.15E-01 | -3.12 | 8.53E-04 | 0.98  | 6.04E-01 | M-1 |
| ENSMMUG00000007794  | LOC106993493 | Down Syndrome Cell Adhesion Molecule-like Protein 1  | 4.60   | 5.58   | 0.16  | 0.10  | -0.49 | 7.89E-01 | -5.82 | 2.34E-06 | -1.02 | 7.26E-01 | M-1 |
| ENSMMUG00000007796  |              |                                                      | 2.82   | 4.86   | 0.67  | 0.27  | 1.35  | 4.78E-01 | -6.85 | 2.88E-05 | 1.29  | 7.50E-01 | M-1 |
| ENSMMUG00000023594  | MPZL3        | Myelin Protein Zero Like 3                           | 3.58   | 5.30   | 0.16  | 0.45  | 0.14  | 9.52E-01 | -8.06 | 1.11E-06 | 3.64  | 1.41E-01 | M-1 |
| ENSMMUG00000016946  | TRAPPC4      | Trafficking Protein Particle Complex 4               | 6.24   | 20.20  | 8.30  | 6.94  | 1.47  | 1.49E-01 | -2.01 | 3.53E-02 | 0.97  | 5.90E-01 | M-1 |
| ENSMMUG00000008921  | USP2         | Ubiquitin Specific Peptidase 2                       | 170.84 | 150.18 | 8.48  | 2.54  | -0.61 | 6.13E-01 | -4.53 | 2.45E-07 | -1.91 | 1.57E-01 | M-1 |
| ENSMMUG00000019111  | TRIM29       | Tripartite Motif Containing 29                       | 21.49  | 15.98  | 0.76  | 1.01  | -0.07 | 9.70E-01 | -5.64 | 2.72E-07 | 1.35  | 5.28E-01 | M-1 |
| ENSMMUG00000012251  | POU2F3       | POU Class 2 Homeobox 3                               | 6.14   | 10.48  | 0.10  | 0.18  | -0.14 | 9.56E-01 | -6.22 | 4.69E-05 | 0.92  | 8.19E-01 | M-1 |
| ENSMMUG00000014880  | SORL1        | Sortilin Related Receptor 1                          | 10.44  | 5.54   | 0.60  | 1.10  | -1.36 | 2.28E-01 | -3.15 | 1.29E-03 | 0.68  | 7.71E-01 | M-1 |
| ENSMMUG00000002922  |              |                                                      | 6.85   | 2.61   | 1.65  | 0.05  | -1.24 | 4.54E-01 | -3.39 | 1.71E-02 | -2.33 | 3.31E-01 | M-1 |
| ENSMMUG00000015731  | JHY          | Junctional Cadherin Complex Regulator                | 3.39   | 1.56   | 0.44  | 0.27  | -0.68 | 7.25E-01 | -4.26 | 3.18E-03 | 1.38  | 6.42E-01 | M-1 |
| ENSMMUG00000010646  | ZNF202       | Zinc Finger Protein 202                              | 3.27   | 3.82   | 0.44  | 1.56  | -0.74 | 6.19E-01 | -3.60 | 1.46E-03 | 1.61  | 4.14E-01 | M-1 |
| ENSMMUG00000008471  |              |                                                      | 26.55  | 38.99  | 8.34  | 11.83 | 0.43  | 7.74E-01 | -2.94 | 5.96E-03 | 1.85  | 2.65E-01 | M-1 |
| ENSMMUG00000008053  | PKNX2        | PBX/knotted 1 Homeobox 2                             | 4.08   | 3.23   | 0.09  | 0.13  | -0.69 | 6.50E-01 | -4.86 | 1.67E-05 | 0.63  | 8.34E-01 | M-1 |
| ENSMMUG00000007624  | DDX25        | DEAD-box Helicase 25                                 | 4.18   | 3.70   | 0.11  | 0.13  | -0.69 | 6.56E-01 | -6.90 | 1.65E-08 | 0.42  | 9.11E-01 | M-1 |
| ENSMMUG00000007628  | CDON         | Cell Adhesion Associated, Oncogene Regulated         | 4.68   | 4.83   | 1.68  | 3.45  | 0.38  | 8.06E-01 | -2.47 | 2.54E-02 | 1.61  | 3.67E-01 | M-1 |
| ENSMMUG00000006929  | ST3GAL4      | ST3 Beta-galactoside Alpha-2,3-sialyltransferase 4   | 12.09  | 10.02  | 1.87  | 3.28  | -0.31 | 8.36E-01 | -2.79 | 5.69E-03 | 1.01  | 6.17E-01 | M-1 |
| ENSMMUG00000003145  | KCNJ5        | Potassium Voltage-gated Channel Subfamily J Member 5 | 1.24   | 1.31   | 0.10  | 0.14  | -0.27 | 9.03E-01 | -4.26 | 3.66E-03 | 1.19  | 7.26E-01 | M-1 |
| ENSMMUG00000002963  | ARHGAP32     | Rho GTPase Activating Protein 32                     | 11.96  | 9.81   | 2.90  | 5.52  | -0.85 | 3.47E-01 | -1.87 | 1.50E-02 | 0.77  | 6.07E-01 | M-1 |
| ENSMMUG00000018034  | ST14         | Suppression Of Tumorigenicity 14                     | 12.32  | 9.04   | 4.05  | 9.83  | -1.61 | 1.07E-01 | -2.31 | 1.33E-02 | 1.21  | 4.51E-01 | M-1 |
| ENSMMUG00000020197  | NTM          | Neurotrimin                                          | 1.81   | 0.44   | 0.03  | 0.01  | -2.85 | 7.54E-02 | -5.25 | 1.29E-03 | 1.53  | 6.52E-01 | M-1 |
| ENSMMUG00000012410  | IGSF9B       | Immunoglobulin Superfamily Member 9B                 | 1.23   | 3.13   | 0.67  | 0.52  | 1.76  | 2.87E-01 | -3.49 | 1.61E-02 | 0.76  | 8.34E-01 | M-1 |
| ENSMMUG00000007100  |              |                                                      | 123.04 | 45.67  | 35.30 | 1.61  | -1.39 | 1.91E-01 | -3.86 | 2.48E-05 | -0.88 | 6.61E-01 | M-1 |
| ENSMMUG00000023253  |              |                                                      | 264.91 | 98.03  | 24.70 | 7.97  | -1.29 | 1.45E-01 | -2.78 | 3.90E-04 | -1.22 | 3.61E-01 | M-1 |
| ENSMMUG00000021287  | SAP130       | Sin3A Associated Protein 130                         | 64.65  | 92.81  | 32.98 | 22.99 | 0.51  | 3.71E-01 | -1.57 | 7.98E-04 | -0.57 | 5.20E-01 | M-1 |
| ENSMMUG00000004179  | LIMS2        | LIM Zinc Finger Domain Containing 2                  | 2.68   | 1.07   | 0.39  | 0.03  | -2.26 | 1.76E-01 | -4.00 | 1.24E-02 | -2.44 | 3.70E-01 | M-1 |
| ENSMMUG00000004177  | MYO7B        | Myosin VII B                                         | 0.94   | 0.70   | 0.03  | 0.02  | -2.20 | 1.33E-01 | -3.18 | 2.69E-02 | -1.80 | 4.97E-01 | M-1 |
| ENSMMUG00000002799  | IWS1         | IWS1, SUPT6H Interacting Protein                     | 211.17 | 164.06 | 43.07 | 21.98 | -0.59 | 3.85E-01 | -1.97 | 3.18E-04 | -0.60 | 5.82E-01 | M-1 |
| ENSMMUG000000046891 |              |                                                      | 22.85  | 166.25 | 17.91 | 0.67  | 2.95  | 1.80E-01 | -5.15 | 1.11E-02 | 1.29  | 7.98E-01 | M-1 |
| ENSMMUG000000043146 | INHBB        | Inhibin Beta B Subunit                               | 4.37   | 3.40   | 0.45  | 0.02  | 1.40  | 6.10E-01 | -5.73 | 1.01E-02 | -3.47 | 3.47E-01 | M-1 |
| ENSMMUG00000011129  | CFAP221      | Cilia And Flagella Associated Protein 221            | 1.76   | 0.95   | 0.04  | 0.02  | -1.80 | 2.36E-01 | -5.65 | 1.09E-04 | -0.61 | 8.80E-01 | M-1 |
| ENSMMUG000000039116 | CCDC93       | Coiled-coil Domain Containing 93                     | 17.20  | 14.00  | 3.05  | 3.83  | -0.06 | 9.63E-01 | -3.30 | 5.34E-05 | 1.42  | 2.91E-01 | M-1 |
| ENSMMUG000000045065 | LYPD1        | LY6/PLAUR Domain Containing 1                        | 123.90 | 131.18 | 9.42  | 1.21  | -0.03 | 9.82E-01 | -5.80 | 3.08E-13 | -1.19 | 4.26E-01 | M-1 |
| ENSMMUG000000045491 | NCKAP5       | NCK Associated Protein 5                             | 1.29   | 0.54   | 0.04  | 0.03  | -2.53 | 1.18E-01 | -4.68 | 3.07E-03 | -2.83 | 2.59E-01 | M-1 |
| ENSMMUG00000014630  | RAB3GAP1     | RAB3 GTPase Activating Protein Catalytic Subunit 1   | 10.93  | 10.23  | 4.24  | 2.80  | 0.02  | 9.85E-01 | -1.58 | 4.47E-02 | 0.18  | 9.47E-01 | M-1 |
| ENSMMUG00000009844  | R3HDM1       | R3H Domain Containing 1                              | 24.32  | 35.37  | 18.97 | 15.33 | 0.33  | 4.88E-01 | -1.03 | 8.48E-03 | -0.50 | 4.70E-01 | M-1 |
| ENSMMUG00000002560  | SPOPL        | Speckle Type BTB/POZ Protein Like                    | 2.27   | 4.56   | 0.58  | 1.19  | 0.97  | 4.20E-01 | -3.00 | 2.57E-03 | 0.86  | 6.89E-01 | M-1 |
| ENSMMUG00000009885  | LRP1B        | LDL Receptor Related Protein 1B                      | 3.98   | 2.56   | 0.41  | 0.08  | -1.40 | 1.82E-01 | -3.48 | 1.50E-04 | -2.26 | 8.48E-02 | M-1 |
| ENSMMUG00000021330  | KYNU         | Kynureninase                                         | 4.07   | 1.01   | 0.16  | 0.09  | -2.66 | 7.41E-02 | -3.13 | 3.16E-02 | 0.51  | 9.03E-01 | M-1 |
| ENSMMUG00000016845  | ZEB2         | Zinc Finger E-box Binding Homeobox 2                 | 2.41   | 3.24   | 1.53  | 0.11  | 1.20  | 4.26E-01 | -3.40 | 6.41E-03 | -2.19 | 2.59E-01 | M-1 |

|                    |          |                                                                              |       |       |       |       |       |          |       |          |       |          |     |
|--------------------|----------|------------------------------------------------------------------------------|-------|-------|-------|-------|-------|----------|-------|----------|-------|----------|-----|
| ENSMMUG00000038492 | LYPD6    | LY6/PLAUR Domain<br>Containing 6                                             | 30.68 | 11.15 | 6.51  | 0.28  | -1.89 | 8.92E-02 | -4.23 | 2.03E-05 | -1.32 | 4.80E-01 | M-1 |
| ENSMMUG00000016040 | RND3     | Rho Family GTPase 3                                                          | 0.97  | 1.71  | 0.55  | 0.21  | 0.65  | 7.00E-01 | -5.41 | 1.08E-05 | 3.19  | 6.11E-02 | M-1 |
| ENSMMUG00000010927 | TNFAIP6  | TNF Alpha Induced Protein<br>6                                               | 6.09  | 5.71  | 1.17  | 0.05  | -2.35 | 2.67E-01 | -4.54 | 1.66E-02 | -4.40 | 1.03E-01 | M-1 |
| ENSMMUG00000008615 | NEB      | Nebulin                                                                      | 54.63 | 55.27 | 6.67  | 0.94  | 0.02  | 9.83E-01 | -4.13 | 2.26E-11 | -1.37 | 1.58E-01 | M-1 |
| ENSMMUG00000045983 |          |                                                                              | 8.29  | 7.70  | 3.34  | 2.44  | -0.48 | 6.71E-01 | -2.00 | 2.10E-02 | 0.62  | 7.51E-01 | M-1 |
| ENSMMUG00000031452 | FMNL2    | Formin Like 2                                                                | 62.70 | 85.81 | 15.90 | 14.74 | 0.10  | 9.28E-01 | -2.19 | 1.74E-03 | 0.06  | 9.82E-01 | M-1 |
| ENSMMUG00000043698 |          |                                                                              | 10.12 | 7.74  | 0.40  | 0.18  | -1.73 | 4.79E-01 | -4.34 | 4.47E-02 | -1.08 | 8.51E-01 | M-1 |
| ENSMMUG00000048299 |          |                                                                              | 43.43 | 49.89 | 19.10 | 10.46 | 0.32  | 6.90E-01 | -2.26 | 9.48E-05 | -0.06 | 9.77E-01 | M-1 |
| ENSMMUG00000014176 | CYTIP    | Cytohesin 1 Interacting<br>Protein                                           | 7.45  | 7.62  | 3.02  | 0.08  | 0.45  | 8.06E-01 | -4.65 | 1.66E-04 | -1.17 | 6.62E-01 | M-1 |
| ENSMMUG00000011636 | UPP2     | Uridine Phosphorylase 2                                                      | 5.54  | 4.19  | 0.05  | 0.07  | -1.98 | 2.16E-01 | -5.24 | 1.51E-03 | -0.89 | 8.33E-01 | M-1 |
| ENSMMUG00000011637 | CCDC148  | Coiled-coil Domain<br>Containing 148                                         | 2.02  | 1.92  | 0.40  | 0.06  | 0.39  | 8.72E-01 | -3.81 | 2.16E-02 | -2.24 | 4.54E-01 | M-1 |
| ENSMMUG00000043509 |          |                                                                              | 1.21  | 0.21  | 0.05  | 0.30  | -2.59 | 8.39E-02 | -3.29 | 2.78E-02 | 3.15  | 1.22E-01 | M-1 |
| ENSMMUG00000020585 | KLHL23   | Kelch Like Family Member<br>23                                               | 21.63 | 9.60  | 2.48  | 0.39  | -2.04 | 8.87E-02 | -3.57 | 1.10E-03 | -0.24 | 9.51E-01 | M-1 |
| ENSMMUG00000016256 | MYO3B    | Myosin IIIB                                                                  | 11.56 | 4.19  | 0.18  | 0.16  | -2.05 | 5.43E-02 | -3.53 | 4.48E-04 | -1.04 | 6.28E-01 | M-1 |
| ENSMMUG00000023006 | CIR1     | Corepressor Interacting<br>With RBPJ, 1                                      | 28.85 | 43.92 | 17.83 | 9.63  | 0.52  | 3.77E-01 | -1.40 | 4.43E-03 | -0.72 | 3.92E-01 | M-1 |
| ENSMMUG00000003947 | ATF2     | Activating Transcription<br>Factor 2                                         | 32.06 | 50.77 | 14.12 | 7.63  | 0.59  | 5.49E-01 | -2.23 | 3.90E-03 | -0.44 | 8.19E-01 | M-1 |
| ENSMMUG00000023498 | LNPB     | Lunapark, ER Junction<br>Formation Factor                                    | 23.93 | 12.79 | 5.50  | 3.34  | -1.40 | 6.66E-02 | -1.91 | 7.74E-03 | 0.46  | 7.90E-01 | M-1 |
| ENSMMUG00000048944 |          |                                                                              | 3.69  | 6.89  | 3.22  | 1.58  | 0.89  | 1.05E-01 | -1.41 | 5.54E-03 | -0.35 | 7.80E-01 | M-1 |
| ENSMMUG00000019689 | CCDC141  | Coiled-coil Domain<br>Containing 141                                         | 4.09  | 2.72  | 0.67  | 0.19  | -0.95 | 3.93E-01 | -4.76 | 1.24E-07 | 1.02  | 5.85E-01 | M-1 |
| ENSMMUG00000003855 | ZNF385B  | Zinc Finger Protein 385B                                                     | 4.07  | 2.97  | 0.77  | 0.05  | -0.29 | 9.00E-01 | -6.70 | 5.34E-06 | 1.51  | 6.31E-01 | M-1 |
| ENSMMUG00000014277 | SSFA2    | Sperm Specific Antigen 2                                                     | 15.56 | 9.17  | 4.19  | 2.95  | -0.81 | 3.81E-01 | -3.15 | 2.22E-05 | 1.17  | 3.60E-01 | M-1 |
| ENSMMUG00000047996 | DUSP19   | Dual Specificity<br>Phosphatase 19                                           | 0.88  | 1.67  | 0.65  | 0.31  | 0.56  | 7.20E-01 | -3.58 | 1.88E-03 | 1.72  | 3.84E-01 | M-1 |
| ENSMMUG00000048330 |          |                                                                              | 2.16  | 2.13  | 0.12  | 0.02  | -0.13 | 9.73E-01 | -9.86 | 4.50E-05 | 2.72  | 5.83E-01 | M-1 |
| ENSMMUG00000010405 | FAM171B  | Family With Sequence<br>Similarity 171 Member B                              | 34.36 | 14.48 | 2.14  | 1.94  | -1.91 | 9.79E-02 | -3.28 | 1.85E-03 | -1.29 | 5.14E-01 | M-1 |
| ENSMMUG00000008265 | GULP1    | GULP, Engulfment Adaptor<br>PTB Domain Containing 1                          | 5.68  | 6.17  | 0.74  | 0.61  | -0.77 | 6.96E-01 | -5.51 | 1.81E-04 | 3.64  | 9.18E-02 | M-1 |
| ENSMMUG00000011080 | WDR75    | WD Repeat Domain 75                                                          | 7.03  | 9.91  | 5.12  | 4.30  | 0.32  | 5.97E-01 | -1.07 | 2.57E-02 | 0.41  | 6.82E-01 | M-1 |
| ENSMMUG00000022664 | NAB1     | NGFI-A Binding Protein 1                                                     | 7.25  | 6.78  | 1.52  | 2.38  | 0.44  | 7.17E-01 | -4.24 | 5.29E-07 | 2.19  | 6.96E-02 | M-1 |
| ENSMMUG00000005617 | STAT4    | Signal Transducer And<br>Activator Of Transcription 4                        | 3.92  | 1.76  | 1.27  | 0.09  | -1.33 | 4.55E-01 | -4.04 | 7.45E-03 | -2.28 | 3.63E-01 | M-1 |
| ENSMMUG00000009460 | NABP1    | Nucleic Acid Binding<br>Protein 1                                            | 90.30 | 43.86 | 26.94 | 27.88 | -0.85 | 3.24E-01 | -1.97 | 7.74E-03 | 0.96  | 4.65E-01 | M-1 |
| ENSMMUG00000002766 |          |                                                                              | 8.83  | 18.26 | 5.28  | 1.20  | 1.33  | 2.31E-01 | -3.28 | 6.86E-04 | -1.38 | 4.31E-01 | M-1 |
| ENSMMUG00000001475 | TMEFF2   | Transmembrane Protein<br>With EGF Like And Two<br>Follistatin Like Domains 2 | 1.29  | 2.69  | 0.52  | 0.04  | 0.51  | 8.20E-01 | -7.48 | 7.29E-06 | 1.96  | 5.53E-01 | M-1 |
| ENSMMUG00000021931 | AOX1     | Aldehyde Oxidase 1                                                           | 3.14  | 1.44  | 0.12  | 0.11  | -1.39 | 3.73E-01 | -5.74 | 2.21E-05 | 0.78  | 8.19E-01 | M-1 |
| ENSMMUG00000018144 |          |                                                                              | 24.58 | 12.77 | 1.29  | 0.21  | -1.46 | 1.41E-01 | -3.96 | 4.25E-06 | -1.43 | 3.35E-01 | M-1 |
| ENSMMUG00000018151 | MPP4     | Membrane Palmitoylated<br>Protein 4                                          | 7.44  | 7.12  | 0.32  | 0.08  | -1.15 | 4.60E-01 | -5.12 | 7.68E-05 | -0.08 | 9.87E-01 | M-1 |
| ENSMMUG00000018155 | ALS2     | ALS2, Alsin Rho Guanine<br>Nucleotide Exchange Factor                        | 7.24  | 27.57 | 4.67  | 3.86  | 1.79  | 5.33E-02 | -3.20 | 1.40E-04 | 0.57  | 7.86E-01 | M-1 |
| ENSMMUG00000001883 | KIAA2012 | KIAA2012 Ortholog                                                            | 2.91  | 1.95  | 0.18  | 0.21  | -1.26 | 3.22E-01 | -2.75 | 1.45E-02 | -0.56 | 8.50E-01 | M-1 |
| ENSMMUG00000048038 |          |                                                                              | 6.37  | 2.95  | 1.19  | 0.87  | -1.08 | 3.54E-01 | -2.45 | 2.02E-02 | 0.32  | 9.20E-01 | M-1 |
| ENSMMUG00000017364 | ICA1L    | Islet Cell Autoantigen 1 Like                                                | 11.78 | 4.70  | 1.71  | 0.46  | -1.53 | 2.17E-01 | -3.06 | 5.93E-03 | -0.12 | 9.77E-01 | M-1 |
| ENSMMUG00000014814 | PARD3B   | Par-3 Family Cell Polarity<br>Regulator Beta                                 | 6.79  | 11.38 | 0.86  | 0.58  | 0.30  | 8.18E-01 | -3.47 | 7.12E-05 | -0.44 | 8.53E-01 | M-1 |
| ENSMMUG00000020052 | NRP2     | Neuropilin 2                                                                 | 41.07 | 16.61 | 2.26  | 0.58  | -1.43 | 2.54E-01 | -4.15 | 7.98E-05 | 0.06  | 9.87E-01 | M-1 |
| ENSMMUG00000017524 | PIKFYVE  | Phosphoinositide Kinase,<br>FYVE-type Zinc Finger<br>Containing              | 12.27 | 12.18 | 4.76  | 7.01  | -0.12 | 8.63E-01 | -1.12 | 1.65E-02 | 0.57  | 5.00E-01 | M-1 |

|                     |           |                                                                      |        |        |       |       |       |          |       |          |       |          |     |
|---------------------|-----------|----------------------------------------------------------------------|--------|--------|-------|-------|-------|----------|-------|----------|-------|----------|-----|
| ENSMMUG00000005295  | PTH2R     | Parathyroid Hormone 2 Receptor                                       | 1.04   | 1.50   | 0.11  | 0.09  | 0.73  | 7.12E-01 | -3.89 | 1.29E-02 | -1.75 | 5.86E-01 | M-1 |
| ENSMMUG00000002809  |           |                                                                      | 0.77   | 6.57   | 0.56  | 0.20  | 2.61  | 5.18E-02 | -5.71 | 2.47E-06 | 1.93  | 3.55E-01 | M-1 |
| ENSMMUG00000010508  | CPS1      | Carbamoyl-phosphate Synthase 1                                       | 0.89   | 0.23   | 0.05  | 0.01  | -2.95 | 2.10E-01 | -4.45 | 4.77E-02 | -1.63 | 7.38E-01 | M-1 |
| ENSMMUG00000000382  | LOC694114 | Sperm-associated Antigen 16 Protein                                  | 12.11  | 23.90  | 4.01  | 3.07  | -0.03 | 9.85E-01 | -2.89 | 7.33E-03 | -0.05 | 9.92E-01 | M-1 |
| ENSMMUG000000040279 | TMEM169   | Transmembrane Protein 169                                            | 11.39  | 10.76  | 0.51  | 0.17  | -0.28 | 8.15E-01 | -5.61 | 1.24E-12 | -0.12 | 9.70E-01 | M-1 |
| ENSMMUG000000041480 | IGFBP5    | Insulin Like Growth Factor Binding Protein 5                         | 26.50  | 15.31  | 0.25  | 0.37  | -0.53 | 6.47E-01 | -5.74 | 7.88E-12 | 0.35  | 8.93E-01 | M-1 |
| ENSMMUG00000006737  | ZNF142    | Zinc Finger Protein 142                                              | 18.62  | 33.84  | 11.35 | 4.78  | 1.00  | 5.44E-02 | -1.64 | 6.03E-04 | -1.00 | 1.66E-01 | M-1 |
| ENSMMUG00000006755  | TTL4      | Tubulin Tyrosine Ligase Like 4                                       | 21.57  | 40.16  | 11.52 | 9.78  | 0.95  | 2.48E-01 | -1.85 | 1.05E-02 | -0.30 | 8.82E-01 | M-1 |
| ENSMMUG00000019628  | TUBA4A    | Tubulin Alpha 4a                                                     | 10.49  | 8.60   | 1.80  | 0.27  | -0.66 | 6.34E-01 | -3.68 | 4.17E-04 | -1.53 | 4.08E-01 | M-1 |
| ENSMMUG00000019629  |           |                                                                      | 13.89  | 10.91  | 1.31  | 0.17  | -0.32 | 8.68E-01 | -3.97 | 2.17E-03 | -2.63 | 1.96E-01 | M-1 |
| ENSMMUG00000012008  | PTPRN     | Protein Tyrosine Phosphatase, Receptor Type N                        | 0.18   | 3.99   | 0.60  | 0.49  | 2.19  | 1.94E-01 | -4.05 | 8.20E-03 | -1.28 | 6.92E-01 | M-1 |
| ENSMMUG00000007481  | LOC705624 | Obscurin-like Protein 1                                              | 1.44   | 0.63   | 0.02  | 0.37  | -2.49 | 1.36E-01 | -4.27 | 7.96E-03 | 3.32  | 1.65E-01 | M-1 |
| ENSMMUG00000006161  | SERPINE2  | Serpin Family E Member 2                                             | 26.06  | 23.86  | 15.76 | 2.36  | -0.08 | 9.51E-01 | -2.97 | 1.68E-04 | -0.30 | 9.00E-01 | M-1 |
| ENSMMUG00000018139  | DOCK10    | Dedicator Of Cytokinesis 10                                          | 1.20   | 0.33   | 0.12  | 0.01  | -1.37 | 3.47E-01 | -2.66 | 4.36E-02 | -2.84 | 1.39E-01 | M-1 |
| ENSMMUG000000045544 | NYAP2     | Neuronal Tyrosine-phosphorylated Phosphoinositide-3-kinase Adaptor 2 | 3.32   | 12.40  | 0.55  | 0.04  | 1.04  | 5.98E-01 | -5.99 | 6.31E-05 | -1.18 | 7.51E-01 | M-1 |
| ENSMMUG00000019467  | IRS1      | Insulin Receptor Substrate 1                                         | 1.39   | 1.74   | 0.25  | 0.44  | -0.19 | 9.15E-01 | -2.46 | 2.87E-02 | 1.94  | 2.56E-01 | M-1 |
| ENSMMUG00000000722  | RHBDD1    | Rhomboid Domain Containing 1                                         | 8.94   | 12.35  | 3.58  | 1.53  | 0.14  | 9.17E-01 | -1.76 | 4.69E-02 | -1.54 | 2.38E-01 | M-1 |
| ENSMMUG00000013254  | SPHKAP    | SPHK1 Interactor, AKAP Domain Containing                             | 10.79  | 7.85   | 1.54  | 0.07  | -0.97 | 4.82E-01 | -4.37 | 5.67E-05 | -2.73 | 8.09E-02 | M-1 |
| ENSMMUG00000004254  | FBXO36    | F-box Protein 36                                                     | 2.85   | 4.06   | 0.93  | 0.77  | -0.12 | 9.28E-01 | -1.92 | 2.49E-02 | -0.61 | 7.51E-01 | M-1 |
| ENSMMUG00000011775  | ARMC9     | Armadillo Repeat Containing 9                                        | 3.06   | 4.64   | 0.49  | 0.25  | 0.83  | 5.48E-01 | -4.30 | 5.69E-05 | 0.17  | 9.67E-01 | M-1 |
| ENSMMUG000000022831 | COPS7B    | COP9 Signalosome Subunit 7B                                          | 64.74  | 62.57  | 15.07 | 7.56  | -0.22 | 8.72E-01 | -3.92 | 4.02E-06 | -0.54 | 8.05E-01 | M-1 |
| ENSMMUG000000021219 | MROH2A    | Maestro Heat Like Repeat Family Member 2A                            | 1.00   | 0.97   | 0.19  | 0.12  | 0.27  | 8.86E-01 | -3.50 | 4.30E-03 | -0.23 | 9.61E-01 | M-1 |
| ENSMMUG000000021221 | HJURP     | Holliday Junction Recognition Protein                                | 176.54 | 183.66 | 27.19 | 15.10 | 0.02  | 9.86E-01 | -2.94 | 1.17E-07 | -0.88 | 3.71E-01 | M-1 |
| ENSMMUG000000043646 |           |                                                                      | 12.04  | 9.55   | 0.87  | 0.38  | -2.10 | 2.08E-01 | -3.48 | 3.51E-02 | -1.16 | 7.45E-01 | M-1 |
| ENSMMUG00000017404  | IQCA1     | IQ Motif Containing With AAA Domain 1                                | 3.92   | 1.95   | 0.32  | 0.17  | -1.39 | 4.03E-01 | -4.46 | 2.31E-03 | -1.07 | 7.54E-01 | M-1 |
| ENSMMUG00000014049  | COL6A3    | Collagen Type VI Alpha 3 Chain                                       | 4.66   | 2.31   | 0.10  | 0.02  | -0.87 | 5.74E-01 | -6.35 | 1.17E-07 | -0.65 | 8.48E-01 | M-1 |
| ENSMMUG00000016209  | PPP1R7    | Protein Phosphatase 1 Regulatory Subunit 7                           | 8.44   | 13.17  | 4.62  | 3.86  | 0.80  | 4.24E-01 | -1.92 | 2.36E-02 | -0.50 | 8.05E-01 | M-1 |
| ENSMMUG00000004730  | HDLBP     | High Density Lipoprotein Binding Protein                             | 46.56  | 91.09  | 36.39 | 37.95 | 1.03  | 1.03E-01 | -1.29 | 3.19E-02 | -0.17 | 9.20E-01 | M-1 |
| ENSMMUG00000021368  |           |                                                                      | 1.13   | 1.26   | 0.08  | 0.25  | 0.51  | 8.04E-01 | -6.66 | 2.80E-05 | 3.34  | 1.51E-01 | M-1 |
| ENSMMUG00000019607  | PNPLA7    | Patatin Like Phospholipase Domain Containing 7                       | 3.39   | 1.87   | 0.07  | 0.02  | -0.70 | 7.71E-01 | -4.61 | 9.08E-03 | -1.49 | 7.14E-01 | M-1 |
| ENSMMUG000000005056 | ENTPD2    | Ectonucleoside Triphosphate Diphosphohydrolase 2                     | 2.35   | 1.84   | 0.33  | 0.22  | -1.60 | 4.25E-01 | -3.97 | 2.72E-02 | -2.11 | 5.04E-01 | M-1 |
| ENSMMUG00000003086  | SNAPC4    | Small Nuclear RNA Activating Complex Polypeptide 4                   | 3.72   | 5.04   | 1.58  | 1.18  | 0.47  | 7.09E-01 | -2.04 | 3.31E-02 | 0.34  | 9.00E-01 | M-1 |
| ENSMMUG000000021496 | KCNT1     | Potassium Sodium-activated Channel Subfamily T Member 1              | 5.65   | 17.36  | 0.32  | 0.05  | 1.24  | 4.27E-01 | -6.59 | 1.09E-07 | -2.36 | 2.61E-01 | M-1 |
| ENSMMUG00000017210  | SARDH     | Sarcosine Dehydrogenase                                              | 2.20   | 2.69   | 0.89  | 0.03  | -0.17 | 9.33E-01 | -6.78 | 1.71E-07 | 0.72  | 8.35E-01 | M-1 |
| ENSMMUG00000017207  | DBH       | Dopamine Beta-hydroxylase                                            | 82.98  | 105.88 | 3.85  | 0.49  | -0.23 | 8.71E-01 | -5.34 | 2.15E-09 | -2.14 | 1.13E-01 | M-1 |

|                    |            |                                                                                      |        |        |        |       |       |          |        |          |       |          |     |
|--------------------|------------|--------------------------------------------------------------------------------------|--------|--------|--------|-------|-------|----------|--------|----------|-------|----------|-----|
| ENSMMUG00000015100 | ABO        | ABO, Alpha 1-3-N-acetylgalactosaminyltransferase And Alpha 1-3-galactosyltransferase | 9.33   | 11.88  | 13.48  | 0.10  | -0.56 | 8.12E-01 | -3.79  | 2.94E-02 | -1.98 | 5.61E-01 | M-1 |
| ENSMMUG00000004588 | CFAP77     | Cilia And Flagella Associated Protein 77                                             | 15.14  | 27.66  | 0.81   | 0.05  | -0.23 | 9.23E-01 | -7.98  | 3.91E-07 | -0.84 | 8.53E-01 | M-1 |
| ENSMMUG00000009973 | PRRC2B     | Proline Rich Coiled-coil 2B                                                          | 32.39  | 30.86  | 12.98  | 15.01 | 0.32  | 7.51E-01 | -1.62  | 2.83E-02 | 0.17  | 9.46E-01 | M-1 |
| ENSMMUG00000021724 | NUP214     | Nucleoporin 214                                                                      | 57.54  | 63.73  | 31.60  | 21.05 | 0.25  | 5.87E-01 | -1.32  | 1.56E-04 | -0.58 | 3.14E-01 | M-1 |
| ENSMMUG00000012499 | ABL1       | ABL Proto-oncogene 1, Non-receptor Tyrosine Kinase                                   | 26.06  | 36.96  | 9.60   | 5.55  | 0.72  | 4.59E-01 | -2.84  | 2.37E-04 | 0.09  | 9.75E-01 | M-1 |
| ENSMMUG00000003795 | C15H9orf78 | Chromosome 15 Open Reading Frame, Human C9orf78                                      | 148.83 | 263.20 | 73.22  | 29.69 | 0.91  | 1.86E-01 | -2.77  | 2.39E-06 | -0.15 | 9.45E-01 | M-1 |
| ENSMMUG00000017799 | LRRC8A     | Leucine Rich Repeat Containing 8 VRAC Subunit A                                      | 32.00  | 35.81  | 7.31   | 3.48  | -0.07 | 9.49E-01 | -2.05  | 3.85E-03 | -0.81 | 5.49E-01 | M-1 |
| ENSMMUG00000005987 | ODF2       | Outer Dense Fiber Of Sperm Tails 2                                                   | 10.03  | 16.77  | 4.63   | 5.05  | 1.32  | 9.62E-02 | -2.82  | 5.93E-05 | 0.44  | 8.05E-01 | M-1 |
| ENSMMUG00000047346 | AK1        | Adenylate Kinase 1                                                                   | 0.96   | 3.53   | 0.36   | 0.13  | 1.39  | 4.75E-01 | -3.97  | 1.34E-02 | -0.13 | 9.82E-01 | M-1 |
| ENSMMUG00000002248 |            |                                                                                      | 69.81  | 60.56  | 6.78   | 0.35  | -0.76 | 5.28E-01 | -5.23  | 1.03E-08 | -2.23 | 1.03E-01 | M-1 |
| ENSMMUG00000016421 | STXBP1     | Syntaxin Binding Protein 1                                                           | 50.18  | 27.48  | 6.98   | 1.49  | -1.08 | 2.35E-01 | -3.62  | 1.91E-06 | -0.33 | 8.82E-01 | M-1 |
| ENSMMUG00000013763 | PBX3       | PBX Homeobox 3                                                                       | 6.45   | 5.66   | 3.92   | 0.68  | -0.59 | 6.30E-01 | -1.94  | 4.71E-02 | -0.79 | 6.96E-01 | M-1 |
| ENSMMUG00000020549 | PPP6C      | Protein Phosphatase 6 Catalytic Subunit                                              | 21.77  | 23.68  | 9.19   | 6.03  | 0.39  | 6.92E-01 | -2.11  | 3.95E-03 | -0.05 | 9.86E-01 | M-1 |
| ENSMMUG00000020633 | SCAI       | Suppressor Of Cancer Cell Invasion                                                   | 20.20  | 22.88  | 1.92   | 1.79  | -0.15 | 9.35E-01 | -3.98  | 2.83E-04 | 0.82  | 7.51E-01 | M-1 |
| ENSMMUG00000000670 | RABGAP1    | RAB GTPase Activating Protein 1                                                      | 55.78  | 34.65  | 11.19  | 10.23 | -0.62 | 1.95E-01 | -2.05  | 4.33E-07 | 0.18  | 8.74E-01 | M-1 |
| ENSMMUG00000014477 |            |                                                                                      | 9.13   | 2.49   | 0.28   | 0.12  | -1.90 | 1.33E-01 | -4.66  | 5.85E-05 | 0.21  | 9.64E-01 | M-1 |
| ENSMMUG00000004639 | DAB2IP     | DAB2 Interacting Protein                                                             | 25.40  | 11.58  | 1.54   | 1.43  | -1.02 | 2.16E-01 | -3.78  | 3.74E-08 | 0.07  | 9.78E-01 | M-1 |
| ENSMMUG00000010623 | PHF19      | PHD Finger Protein 19                                                                | 1.07   | 0.16   | 0.05   | 0.13  | -3.17 | 7.78E-02 | -4.64  | 1.29E-02 | 2.81  | 3.22E-01 | M-1 |
| ENSMMUG00000008018 | AKNA       | AT-hook Transcription Factor                                                         | 3.39   | 3.01   | 0.80   | 1.00  | 0.21  | 9.05E-01 | -2.76  | 1.38E-02 | 0.31  | 9.31E-01 | M-1 |
| ENSMMUG00000000172 | SLC31A2    | Solute Carrier Family 31 Member 2                                                    | 12.85  | 3.23   | 1.20   | 1.23  | -1.55 | 2.53E-01 | -3.42  | 4.23E-03 | 2.05  | 2.69E-01 | M-1 |
| ENSMMUG00000006906 | LPAR1      | Lysophosphatidic Acid Receptor 1                                                     | 6.40   | 3.71   | 1.10   | 0.58  | -1.60 | 1.12E-01 | -2.65  | 4.26E-03 | 0.95  | 6.06E-01 | M-1 |
| ENSMMUG00000001250 | PTPN3      | Protein Tyrosine Phosphatase, Non-receptor Type 3                                    | 7.75   | 7.06   | 1.92   | 8.46  | -0.36 | 7.93E-01 | -2.12  | 3.33E-02 | 2.01  | 1.49E-01 | M-1 |
| ENSMMUG00000038835 |            |                                                                                      | 14.63  | 13.78  | 0.37   | 0.13  | -1.04 | 6.60E-01 | -5.93  | 2.88E-03 | -0.22 | 9.76E-01 | M-1 |
| ENSMMUG00000002665 | FSD1L      | Fibronectin Type III And SPRY Domain Containing 1 Like                               | 2.97   | 0.56   | 0.13   | 0.19  | -2.13 | 2.90E-01 | -4.38  | 1.94E-02 | 2.74  | 3.50E-01 | M-1 |
| ENSMMUG00000016670 | RNF20      | Ring Finger Protein 20                                                               | 72.71  | 61.27  | 26.89  | 11.03 | -0.32 | 6.53E-01 | -1.37  | 1.15E-02 | -1.03 | 2.01E-01 | M-1 |
| ENSMMUG00000011414 | STX17      | Syntaxin 17                                                                          | 13.87  | 11.32  | 5.45   | 3.15  | -0.28 | 7.90E-01 | -2.63  | 2.73E-04 | 0.66  | 6.71E-01 | M-1 |
| ENSMMUG00000009832 | GABBR2     | Gamma-aminobutyric Acid Type B Receptor Subunit 2                                    | 7.69   | 6.27   | 0.72   | 1.63  | -0.61 | 6.49E-01 | -4.16  | 3.05E-05 | 2.40  | 9.35E-02 | M-1 |
| ENSMMUG00000001773 | TRIM14     | Tripartite Motif Containing 14                                                       | 5.73   | 1.85   | 1.61   | 0.04  | -2.41 | 1.41E-01 | -4.87  | 2.92E-03 | 0.11  | 9.86E-01 | M-1 |
| ENSMMUG00000013634 | HEMGN      | Hemogen                                                                              | 0.81   | 0.22   | 0.52   | 0.01  | -2.49 | 4.17E-01 | -6.56  | 1.51E-02 | -0.98 | 8.96E-01 | M-1 |
| ENSMMUG00000012282 | XPA        | XPA, DNA Damage Recognition And Repair Factor                                        | 16.97  | 27.09  | 7.36   | 3.81  | -0.42 | 7.80E-01 | -2.55  | 1.84E-02 | 0.91  | 6.92E-01 | M-1 |
| ENSMMUG00000012275 | TDRD7      | Tudor Domain Containing 7                                                            | 14.18  | 6.17   | 2.27   | 1.19  | -1.50 | 1.40E-01 | -2.17  | 2.14E-02 | 0.58  | 7.98E-01 | M-1 |
| ENSMMUG00000012266 | CCDC180    | Coiled-coil Domain Containing 180                                                    | 3.63   | 4.62   | 0.22   | 0.04  | -1.37 | 2.57E-01 | -3.20  | 3.50E-03 | -2.77 | 8.88E-02 | M-1 |
| ENSMMUG00000004629 | NOL8       | Nucleolar Protein 8                                                                  | 132.13 | 160.49 | 68.10  | 38.36 | 0.08  | 9.12E-01 | -0.95  | 4.18E-02 | -0.44 | 6.22E-01 | M-1 |
| ENSMMUG00000004630 | CENPP      | Centromere Protein P                                                                 | 42.15  | 29.08  | 6.26   | 8.56  | -0.48 | 6.04E-01 | -1.88  | 8.49E-03 | 0.46  | 7.91E-01 | M-1 |
| ENSMMUG00000027104 | MIRLET7F-1 | MicroRNA Let-7f-1                                                                    | 0.27   | 0.51   | 0.81   | 2.06  | 6.82  | 3.66E-01 | -17.13 | 7.08E-03 | 12.63 | 1.77E-01 | M-1 |
| ENSMMUG00000003782 | MELK       | Maternal Embryonic Leucine Zipper Kinase                                             | 21.78  | 12.92  | 11.49  | 12.37 | -0.56 | 5.95E-01 | -1.83  | 2.92E-02 | 1.67  | 1.64E-01 | M-1 |
| ENSMMUG00000016605 | RNF38      | Ring Finger Protein 38                                                               | 570.66 | 807.06 | 168.02 | 53.41 | 0.22  | 8.42E-01 | -2.48  | 6.11E-04 | -1.17 | 3.31E-01 | M-1 |

|                     |           |                                                                                                   |        |        |        |       |       |          |        |          |       |          |     |
|---------------------|-----------|---------------------------------------------------------------------------------------------------|--------|--------|--------|-------|-------|----------|--------|----------|-------|----------|-----|
| ENSMMUG00000043693  |           |                                                                                                   | 0.40   | 3.96   | 0.33   | 0.39  | 1.73  | 5.38E-01 | -5.16  | 3.49E-02 | 1.44  | 8.06E-01 | M-1 |
| ENSMMUG00000018726  | KIF24     | Kinesin Family Member 24                                                                          | 10.07  | 6.26   | 1.52   | 3.05  | -0.53 | 6.16E-01 | -2.76  | 5.43E-04 | 1.00  | 5.05E-01 | M-1 |
| ENSMMUG00000017458  | DCAF12    | DDB1 And CUL4 Associated Factor 12                                                                | 16.14  | 12.93  | 2.67   | 2.83  | -0.44 | 6.78E-01 | -1.89  | 1.76E-02 | 0.93  | 5.18E-01 | M-1 |
| ENSMMUG00000002686  | TOPORS    | TOP1 Binding Arginine/serine Rich Protein                                                         | 51.41  | 40.27  | 23.22  | 10.66 | -0.26 | 7.04E-01 | -1.15  | 2.46E-02 | -0.99 | 1.77E-01 | M-1 |
| ENSMMUG00000012442  | DDX58     | DExD/H-box Helicase 58                                                                            | 43.56  | 16.78  | 2.39   | 0.59  | -1.71 | 6.14E-02 | -3.31  | 7.20E-05 | -1.20 | 4.31E-01 | M-1 |
| ENSMMUG00000017199  | LINGO2    | Leucine Rich Repeat And Ig Domain Containing 2                                                    | 36.15  | 49.07  | 3.66   | 0.33  | -0.34 | 8.24E-01 | -5.72  | 1.08E-08 | -1.47 | 4.27E-01 | M-1 |
| ENSMMUG000000047810 |           |                                                                                                   | 194.49 | 69.59  | 7.09   | 0.69  | -2.07 | 1.36E-01 | -7.22  | 1.03E-08 | 0.70  | 8.32E-01 | M-1 |
| ENSMMUG00000006080  | TEK       | TEK Receptor Tyrosine Kinase                                                                      | 13.10  | 8.56   | 1.46   | 0.89  | -1.05 | 4.75E-01 | -5.47  | 2.05E-06 | 2.23  | 2.21E-01 | M-1 |
| ENSMMUG00000010038  | ELAVL2    | ELAV Like RNA Binding Protein 2                                                                   | 26.80  | 10.11  | 2.99   | 0.62  | -1.58 | 1.08E-01 | -3.50  | 5.60E-05 | -0.60 | 7.78E-01 | M-1 |
| ENSMMUG00000001132  | CDKN2B    | Cyclin Dependent Kinase Inhibitor 2B                                                              | 19.52  | 17.72  | 1.57   | 0.59  | -0.60 | 7.40E-01 | -4.37  | 6.78E-04 | 0.26  | 9.57E-01 | M-1 |
| ENSMMUG00000008325  | MLLT3     | MLLT3, Super Elongation Complex Subunit                                                           | 4.73   | 2.59   | 1.09   | 0.14  | -1.09 | 2.83E-01 | -2.64  | 2.76E-03 | -1.72 | 2.05E-01 | M-1 |
| ENSMMUG000000044658 | ADAMTSL1  | ADAMTS Like 1                                                                                     | 6.15   | 4.01   | 0.27   | 0.07  | -1.22 | 3.90E-01 | -5.32  | 4.56E-06 | -0.08 | 9.86E-01 | M-1 |
| ENSMMUG000000023448 | CNTLN     | Centlein                                                                                          | 17.97  | 21.99  | 6.22   | 2.03  | -0.12 | 9.05E-01 | -2.06  | 7.87E-04 | -1.29 | 1.62E-01 | M-1 |
| ENSMMUG000000045892 |           |                                                                                                   | 5.61   | 57.95  | 1.67   | 0.07  | -0.17 | 9.63E-01 | -11.52 | 2.21E-06 | 1.39  | 8.29E-01 | M-1 |
| ENSMMUG000000049258 |           |                                                                                                   | 10.15  | 3.79   | 0.19   | 0.11  | -2.26 | 3.05E-01 | -4.26  | 4.58E-02 | 0.12  | 9.88E-01 | M-1 |
| ENSMMUG00000006197  | PLGRKT    | Plasminogen Receptor With A C-terminal Lysine                                                     | 11.63  | 8.23   | 1.85   | 6.34  | 0.03  | 9.91E-01 | -4.17  | 5.12E-03 | 3.81  | 5.42E-02 | M-1 |
| ENSMMUG00000015279  | SMARCA2   | SWI/SNF Related, Matrix Associated, Actin Dependent Regulator Of Chromatin, Subfamily A, Member 2 | 62.57  | 53.44  | 8.01   | 3.07  | -0.60 | 5.76E-01 | -4.34  | 3.63E-08 | 0.80  | 6.41E-01 | M-1 |
| ENSMMUG00000014844  | DMRT2     | Doublesex And Mab-3 Related Transcription Factor 2                                                | 13.62  | 5.94   | 0.48   | 0.04  | -2.50 | 5.56E-02 | -4.40  | 4.34E-04 | -3.29 | 7.62E-02 | M-1 |
| ENSMMUG000000044083 | DMRT1     | Doublesex And Mab-3 Related Transcription Factor 1                                                | 0.72   | 1.42   | 0.74   | 0.11  | 0.96  | 5.48E-01 | -3.19  | 1.50E-02 | -0.23 | 9.64E-01 | M-1 |
| ENSMMUG00000019862  | KANK1     | KN Motif And Ankyrin Repeat Domains 1                                                             | 14.96  | 10.40  | 3.73   | 7.42  | -1.25 | 3.65E-01 | -2.50  | 3.74E-02 | 2.06  | 2.49E-01 | M-1 |
| ENSMMUG00000005401  | FAM189A2  | Family With Sequence Similarity 189 Member A2                                                     | 14.56  | 11.07  | 0.39   | 0.08  | -0.34 | 8.58E-01 | -4.71  | 1.67E-04 | -2.79 | 1.55E-01 | M-1 |
| ENSMMUG00000008343  | MAMDC2    | MAM Domain Containing 2                                                                           | 4.98   | 2.86   | 0.58   | 0.41  | -1.86 | 2.30E-01 | -6.52  | 6.48E-06 | 1.18  | 7.02E-01 | M-1 |
| ENSMMUG00000019196  | GDA       | Guanine Deaminase                                                                                 | 22.57  | 10.96  | 3.92   | 0.13  | -1.55 | 1.74E-01 | -3.14  | 2.05E-03 | -2.53 | 7.76E-02 | M-1 |
| ENSMMUG00000012166  |           |                                                                                                   | 13.47  | 9.98   | 3.71   | 1.80  | -0.48 | 7.16E-01 | -2.11  | 3.60E-02 | 0.34  | 9.03E-01 | M-1 |
| ENSMMUG00000022023  | PCSK5     | Proprotein Convertase Subtilisin/kexin Type 5                                                     | 2.49   | 0.87   | 0.53   | 1.85  | -1.82 | 9.11E-02 | -2.49  | 1.47E-02 | 2.10  | 1.45E-01 | M-1 |
| ENSMMUG00000023365  | LOC706619 | Transducin-like Enhancer Protein 4                                                                | 21.71  | 23.42  | 10.84  | 7.52  | -0.08 | 9.04E-01 | -0.99  | 3.13E-02 | -0.43 | 6.40E-01 | M-1 |
| ENSMMUG00000037955  |           |                                                                                                   | 2.78   | 1.35   | 0.16   | 0.01  | -0.33 | 9.28E-01 | -5.37  | 3.32E-02 | -2.19 | 6.74E-01 | M-1 |
| ENSMMUG00000001900  | GOLM1     | Golgi Membrane Protein 1                                                                          | 57.88  | 25.67  | 5.88   | 3.50  | -1.02 | 1.28E-01 | -2.03  | 6.71E-04 | -0.74 | 5.11E-01 | M-1 |
| ENSMMUG00000008629  | SEMA4D    | Semaphorin 4D                                                                                     | 3.37   | 5.72   | 0.24   | 0.57  | -0.12 | 9.45E-01 | -5.89  | 1.95E-08 | 2.70  | 7.48E-02 | M-1 |
| ENSMMUG00000007223  | DIRAS2    | DIRAS Family GTPase 2                                                                             | 233.89 | 201.61 | 20.59  | 2.04  | -0.95 | 3.95E-01 | -4.15  | 3.19E-06 | -1.89 | 1.69E-01 | M-1 |
| ENSMMUG000000040422 |           |                                                                                                   | 304.82 | 135.11 | 32.92  | 1.36  | -1.78 | 1.19E-01 | -3.84  | 1.97E-04 | -2.00 | 2.33E-01 | M-1 |
| ENSMMUG00000009662  | TPO       | Thyroid Peroxidase                                                                                | 2.58   | 2.02   | 0.17   | 0.08  | -0.39 | 8.56E-01 | -4.41  | 2.09E-03 | -0.33 | 9.49E-01 | M-1 |
| ENSMMUG00000021037  | MBOAT2    | Membrane Bound O-acyltransferase Domain Containing 2                                              | 8.96   | 6.15   | 1.00   | 0.71  | -0.47 | 6.70E-01 | -3.98  | 7.37E-07 | 0.25  | 9.22E-01 | M-1 |
| ENSMMUG00000002054  | KLF11     | Kruppel Like Factor 11                                                                            | 22.08  | 20.61  | 10.39  | 2.84  | -0.07 | 9.56E-01 | -1.85  | 2.05E-02 | -0.53 | 7.72E-01 | M-1 |
| ENSMMUG00000010320  | ATP6V1C2  | ATPase H+ Transporting V1 Subunit C2                                                              | 4.59   | 2.88   | 0.65   | 1.43  | -1.00 | 4.98E-01 | -2.99  | 1.38E-02 | 2.59  | 1.29E-01 | M-1 |
| ENSMMUG00000020249  | GREB1     | Growth Regulation By Estrogen In Breast Cancer 1                                                  | 8.33   | 1.53   | 0.55   | 0.30  | -1.83 | 1.82E-01 | -4.16  | 6.83E-04 | 2.07  | 2.94E-01 | M-1 |
| ENSMMUG00000001575  | WDR35     | WD Repeat Domain 35                                                                               | 1.59   | 1.77   | 0.30   | 0.54  | -0.30 | 8.88E-01 | -3.99  | 3.06E-03 | 3.29  | 7.32E-02 | M-1 |
| ENSMMUG00000001582  | LAPTM4A   | Lysosomal Protein Transmembrane 4 Alpha                                                           | 234.85 | 204.89 | 104.30 | 73.81 | -0.04 | 9.55E-01 | -1.62  | 5.79E-04 | 0.50  | 5.97E-01 | M-1 |
| ENSMMUG000000040512 |           |                                                                                                   | 10.49  | 3.26   | 3.59   | 0.03  | -2.42 | 1.53E-01 | -4.31  | 1.04E-02 | -3.18 | 1.98E-01 | M-1 |

|                     |            |                                                           |        |        |        |        |       |          |       |          |       |          |     |
|---------------------|------------|-----------------------------------------------------------|--------|--------|--------|--------|-------|----------|-------|----------|-------|----------|-----|
| ENSMMUG00000009407  | FAM228A    | Family With Sequence Similarity 228 Member A              | 7.60   | 3.95   | 1.14   | 0.59   | -0.84 | 6.11E-01 | -3.21 | 1.39E-02 | 0.79  | 8.07E-01 | M-1 |
| ENSMMUG00000009599  | CENPO      | Centromere Protein O                                      | 29.37  | 24.11  | 7.50   | 6.35   | -0.29 | 8.02E-01 | -1.94 | 1.54E-02 | 1.22  | 3.45E-01 | M-1 |
| ENSMMUG00000009600  | ADCY3      | Adenylate Cyclase 3                                       | 36.24  | 28.01  | 0.81   | 1.39   | -0.56 | 6.22E-01 | -4.75 | 1.11E-08 | 0.19  | 9.52E-01 | M-1 |
| ENSMMUG00000001377  | ASXL2      | Additional Sex Combs Like 2, Transcriptional Regulator    | 27.92  | 36.37  | 12.84  | 19.44  | 0.10  | 9.07E-01 | -1.35 | 1.18E-02 | 0.36  | 7.76E-01 | M-1 |
| ENSMMUG000000038777 |            |                                                           | 2.89   | 0.60   | 0.31   | 0.22   | 0.57  | 8.68E-01 | -7.33 | 2.22E-03 | 2.03  | 6.88E-01 | M-1 |
| ENSMMUG00000004378  | GAREM2     | GRB2 Associated Regulator Of MAPK1 Subtype 2              | 8.12   | 5.53   | 0.76   | 0.06   | -0.10 | 9.61E-01 | -4.33 | 6.98E-04 | -3.03 | 1.37E-01 | M-1 |
| ENSMMUG00000010505  | GTF3C2     | General Transcription Factor IIIC Subunit 2               | 27.71  | 38.56  | 17.90  | 11.01  | 0.60  | 2.03E-01 | -1.44 | 4.40E-04 | -0.74 | 2.53E-01 | M-1 |
| ENSMMUG00000005091  | NRBP1      | Nuclear Receptor Binding Protein 1                        | 39.85  | 66.91  | 31.59  | 26.95  | 0.45  | 6.56E-01 | -2.03 | 7.58E-03 | 0.57  | 7.39E-01 | M-1 |
| ENSMMUG00000019742  | ZNF512     | Zinc Finger Protein 512                                   | 14.29  | 18.98  | 4.45   | 4.32   | 0.21  | 8.53E-01 | -2.59 | 3.39E-04 | -0.06 | 9.82E-01 | M-1 |
| ENSMMUG00000019744  | CCDC121    | Coiled-coil Domain Containing 121                         | 75.45  | 72.22  | 9.07   | 1.24   | -0.64 | 5.62E-01 | -3.23 | 1.38E-04 | -2.14 | 7.41E-02 | M-1 |
| ENSMMUG00000010265  |            |                                                           | 1.56   | 1.90   | 0.03   | 0.03   | 0.81  | 7.08E-01 | -8.15 | 6.95E-07 | 2.11  | 5.11E-01 | M-1 |
| ENSMMUG00000006615  | YPEL5      | Yippee Like 5                                             | 82.89  | 83.12  | 15.26  | 7.27   | -0.17 | 8.66E-01 | -3.27 | 2.75E-07 | 0.30  | 8.67E-01 | M-1 |
| ENSMMUG00000003473  | CAPN13     | Calpain 13                                                | 4.14   | 2.39   | 0.03   | 0.04   | -0.90 | 6.45E-01 | -6.76 | 2.98E-05 | 0.65  | 9.00E-01 | M-1 |
| ENSMMUG000000030881 | CAPN14     | Calpain 14                                                | 2.86   | 0.70   | 0.03   | 0.22   | -2.45 | 1.97E-01 | -6.53 | 3.47E-04 | 2.27  | 4.86E-01 | M-1 |
| ENSMMUG00000003476  | EHD3       | EH Domain Containing 3                                    | 7.04   | 8.55   | 0.16   | 0.54   | 0.00  | 9.99E-01 | -4.89 | 2.13E-06 | 0.62  | 8.12E-01 | M-1 |
| ENSMMUG00000013963  | FEZ2       | Fasciculation And Elongation Protein Zeta 2               | 33.21  | 41.40  | 15.02  | 11.65  | -0.18 | 8.97E-01 | -1.93 | 3.54E-02 | 1.17  | 4.54E-01 | M-1 |
| ENSMMUG00000001278  | VIT        | Vitrin                                                    | 5.70   | 2.75   | 0.21   | 0.05   | -1.91 | 2.66E-01 | -5.96 | 6.86E-05 | -0.15 | 9.80E-01 | M-1 |
| ENSMMUG000000037522 | EIF2AK2    | Eukaryotic Translation Initiation Factor 2 Alpha Kinase 2 | 5.44   | 6.55   | 0.21   | 0.80   | 0.94  | 5.84E-01 | -5.71 | 1.54E-05 | 1.50  | 5.67E-01 | M-1 |
| ENSMMUG00000015508  | SLC8A1     | Solute Carrier Family 8 Member A1                         | 22.13  | 18.79  | 7.46   | 0.25   | -1.01 | 3.64E-01 | -3.75 | 3.27E-05 | -2.14 | 1.03E-01 | M-1 |
| ENSMMUG000000020744 | MTA3       | Metastasis Associated 1 Family Member 3                   | 44.84  | 24.60  | 11.06  | 8.47   | -0.93 | 2.19E-01 | -2.13 | 1.23E-03 | 0.06  | 9.81E-01 | M-1 |
| ENSMMUG000000023326 | EPAS1      | Endothelial PAS Domain Protein 1                          | 25.99  | 46.66  | 3.22   | 1.38   | -0.12 | 9.28E-01 | -4.76 | 3.84E-09 | -0.68 | 7.21E-01 | M-1 |
| ENSMMUG00000013898  | STPG4      | Sperm-tail PG-rich Repeat Containing 4                    | 2.49   | 4.65   | 0.34   | 0.22   | 1.29  | 4.49E-01 | -4.01 | 4.40E-03 | -0.71 | 8.50E-01 | M-1 |
| ENSMMUG000000038179 | NRXN1      | Neurexin 1                                                | 1.09   | 0.44   | 0.01   | 0.03   | -1.73 | 3.37E-01 | -6.66 | 5.10E-05 | 0.81  | 8.53E-01 | M-1 |
| ENSMMUG000000021296 | EML6       | Echinoderm Microtubule Associated Protein Like 6          | 5.64   | 6.67   | 0.53   | 0.31   | -0.26 | 8.53E-01 | -3.45 | 1.60E-04 | -0.84 | 6.79E-01 | M-1 |
| ENSMMUG000000003003 | CCDC88A    | Coiled-coil Domain Containing 88A                         | 34.36  | 33.82  | 6.88   | 3.33   | -0.31 | 7.38E-01 | -1.88 | 5.13E-03 | -1.14 | 2.80E-01 | M-1 |
| ENSMMUG000000007000 | CFAP36     | Cilia And Flagella Associated Protein 36                  | 25.46  | 45.07  | 6.02   | 11.65  | 0.19  | 9.17E-01 | -2.70 | 2.05E-02 | 1.59  | 4.22E-01 | M-1 |
| ENSMMUG00000011303  | BCL11A     | B-cell CLL/lymphoma 11A                                   | 0.96   | 0.99   | 0.09   | 0.01   | -0.32 | 9.24E-01 | -5.39 | 1.34E-02 | -0.25 | 9.75E-01 | M-1 |
| ENSMMUG000000041555 | C13H2orf74 | Chromosome 13 Open Reading Frame, Human C2orf74           | 49.39  | 24.10  | 0.44   | 0.08   | -1.26 | 2.30E-01 | -6.54 | 1.97E-12 | -2.38 | 1.19E-01 | M-1 |
| ENSMMUG000000008098 | USP34      | Ubiquitin Specific Peptidase 34                           | 92.05  | 78.94  | 27.35  | 14.81  | -0.25 | 7.78E-01 | -1.85 | 2.83E-03 | -0.43 | 7.71E-01 | M-1 |
| ENSMMUG000000011216 | MEIS1      | Meis Homeobox 1                                           | 0.87   | 1.35   | 0.46   | 0.22   | 0.50  | 7.36E-01 | -2.26 | 4.31E-02 | -1.02 | 6.47E-01 | M-1 |
| ENSMMUG000000046992 | CNRIP1     | Cannabinoid Receptor Interacting Protein 1                | 142.31 | 150.84 | 15.50  | 0.77   | -0.51 | 7.25E-01 | -4.23 | 3.11E-05 | -2.61 | 7.62E-02 | M-1 |
| ENSMMUG00000014244  | ANTXR1     | Anthrax Toxin Receptor 1                                  | 8.02   | 3.62   | 0.06   | 0.08   | -1.06 | 5.99E-01 | -6.05 | 1.73E-04 | 0.08  | 9.90E-01 | M-1 |
| ENSMMUG000000041817 | MXD1       | MAX Dimerization Protein 1                                | 23.48  | 5.68   | 1.63   | 0.30   | -1.98 | 1.09E-01 | -4.45 | 1.14E-04 | 0.49  | 8.87E-01 | M-1 |
| ENSMMUG000000038295 | PCBP1      | Poly(rC) Binding Protein 1                                | 332.27 | 417.93 | 136.07 | 129.06 | 0.57  | 5.17E-01 | -1.92 | 6.17E-03 | 0.06  | 9.83E-01 | M-1 |
| ENSMMUG00000010592  | ADD2       | Adducin 2                                                 | 9.52   | 15.25  | 0.55   | 0.60   | 0.34  | 8.58E-01 | -4.34 | 4.88E-04 | -1.10 | 6.87E-01 | M-1 |
| ENSMMUG000000020852 | FIGLA      | Folliculogenesis Specific BHLH Transcription Factor       | 29.09  | 4.83   | 0.34   | 0.16   | -2.69 | 5.65E-02 | -4.92 | 4.71E-04 | -0.72 | 8.59E-01 | M-1 |
| ENSMMUG00000002300  | SFXN5      | Sideroflexin 5                                            | 0.96   | 1.61   | 0.08   | 0.27   | 0.62  | 7.70E-01 | -5.24 | 4.35E-04 | 0.70  | 8.63E-01 | M-1 |
| ENSMMUG000000002301 | RAB11FIP5  | RAB11 Family Interacting Protein 5                        | 1.24   | 1.19   | 0.25   | 1.65   | 0.51  | 7.49E-01 | -2.38 | 4.54E-02 | 2.65  | 9.28E-02 | M-1 |
| ENSMMUG000000002819 | ALMS1      | ALMS1, Centrosome And Basal Body Associated Protein       | 26.75  | 29.95  | 11.52  | 9.38   | -0.02 | 9.75E-01 | -1.45 | 1.16E-03 | -0.22 | 8.50E-01 | M-1 |

|                    |           |                                                                                        |        |        |       |       |       |          |       |          |       |          |     |
|--------------------|-----------|----------------------------------------------------------------------------------------|--------|--------|-------|-------|-------|----------|-------|----------|-------|----------|-----|
| ENSMMUG00000020551 | TET3      | Tet Methylcytosine Dioxygenase 3                                                       | 32.80  | 25.45  | 4.82  | 5.59  | -0.22 | 8.50E-01 | -2.69 | 2.60E-04 | 0.05  | 9.86E-01 | M-1 |
| ENSMMUG0000002127  | PCGF1     | Polycomb Group Ring Finger 1                                                           | 11.57  | 13.74  | 3.16  | 2.53  | 0.07  | 9.62E-01 | -2.73 | 3.64E-03 | 0.38  | 8.87E-01 | M-1 |
| ENSMMUG0000002138  | LOXL3     | Lysyl Oxidase Like 3                                                                   | 0.98   | 1.18   | 0.20  | 0.09  | 0.72  | 7.41E-01 | -4.77 | 3.92E-03 | 0.13  | 9.84E-01 | M-1 |
| ENSMMUG0000000181  | LRRTM4    | Leucine Rich Repeat Transmembrane Neuronal 4                                           | 42.99  | 73.88  | 3.03  | 1.54  | -0.52 | 6.85E-01 | -5.45 | 1.07E-09 | -1.29 | 4.40E-01 | M-1 |
| ENSMMUG0000000293  | CTNNA2    | Catenin Alpha 2                                                                        | 3.27   | 2.01   | 0.20  | 0.13  | -1.87 | 1.23E-01 | -3.22 | 4.10E-03 | -1.10 | 6.30E-01 | M-1 |
| ENSMMUG00000019559 | ST3GAL5   | ST3 Beta-galactoside Alpha-2,3-sialyltransferase 5                                     | 9.36   | 4.78   | 0.82  | 1.11  | -0.84 | 6.42E-01 | -4.86 | 4.85E-04 | 3.44  | 8.44E-02 | M-1 |
| ENSMMUG0000003528  |           |                                                                                        | 8.66   | 1.81   | 1.41  | 0.86  | -1.62 | 6.72E-02 | -2.33 | 7.58E-03 | 0.98  | 5.67E-01 | M-1 |
| ENSMMUG00000023269 | LOC709065 | Condensin Complex Subunit 2                                                            | 225.20 | 173.64 | 36.67 | 23.53 | -0.69 | 4.14E-01 | -1.88 | 6.96E-03 | -0.25 | 9.01E-01 | M-1 |
| ENSMMUG00000011477 | KANSL3    | KAT8 Regulatory NSL Complex Subunit 3                                                  | 3.72   | 10.69  | 3.87  | 3.97  | 1.25  | 1.32E-01 | -1.80 | 1.99E-02 | 0.14  | 9.62E-01 | M-1 |
| ENSMMUG00000007591 | ANKRD23   | Ankyrin Repeat Domain 23                                                               | 0.22   | 1.63   | 0.63  | 0.29  | 3.38  | 6.36E-02 | -3.52 | 4.98E-02 | 2.00  | 5.33E-01 | M-1 |
| ENSMMUG00000021187 | CNGA3     | Cyclic Nucleotide Gated Channel Alpha 3                                                | 5.13   | 2.86   | 0.99  | 0.20  | -0.97 | 4.93E-01 | -6.05 | 1.19E-07 | 2.09  | 2.65E-01 | M-1 |
| ENSMMUG00000022909 | MGAT4A    | Mannosyl (alpha-1,3-)-glycoprotein Beta-1,4-N-acetylglucosaminyltransferase, Isozyme A | 216.42 | 106.53 | 24.98 | 1.77  | -1.32 | 1.78E-01 | -2.98 | 5.02E-04 | -2.09 | 8.44E-02 | M-1 |
| ENSMMUG00000022836 | AFF3      | AF4/FMR2 Family Member 3                                                               | 63.33  | 73.32  | 3.56  | 0.39  | -0.83 | 4.98E-01 | -5.46 | 4.71E-09 | -2.00 | 1.73E-01 | M-1 |
| ENSMMUG00000017455 | LONRF2    | LON Peptidase N-terminal Domain And Ring Finger 2                                      | 3.47   | 1.04   | 0.85  | 0.02  | -1.60 | 4.09E-01 | -3.57 | 3.70E-02 | -3.68 | 1.28E-01 | M-1 |
| ENSMMUG00000001147 | CNOT11    | CCR4-NOT Transcription Complex Subunit 11                                              | 121.37 | 91.60  | 26.93 | 17.22 | -0.59 | 5.47E-01 | -2.03 | 8.79E-03 | -0.55 | 7.57E-01 | M-1 |
| ENSMMUG00000016533 | IL1RL2    | Interleukin 1 Receptor Like 2                                                          | 4.54   | 2.37   | 0.11  | 0.03  | -1.40 | 4.42E-01 | -4.08 | 8.94E-03 | -2.60 | 3.50E-01 | M-1 |
| ENSMMUG00000022844 | GCC2      | GRIP And Coiled-coil Domain Containing 2                                               | 151.74 | 75.29  | 22.36 | 9.41  | -1.14 | 8.93E-02 | -2.64 | 8.23E-06 | -0.13 | 9.55E-01 | M-1 |
| ENSMMUG00000019574 | EDAR      | Ectodysplasin A Receptor                                                               | 6.14   | 2.20   | 0.13  | 0.32  | -1.23 | 3.68E-01 | -4.31 | 2.64E-04 | 0.66  | 8.28E-01 | M-1 |
| ENSMMUG00000017177 | SEPT10    | Septin 10                                                                              | 13.99  | 19.06  | 6.24  | 5.76  | 0.19  | 8.95E-01 | -1.88 | 4.41E-02 | 0.27  | 9.18E-01 | M-1 |
| ENSMMUG00000030812 | ZMYM2     | Zinc Finger MYM-type Containing 2                                                      | 60.25  | 48.06  | 23.07 | 21.58 | -0.40 | 4.39E-01 | -1.17 | 6.45E-03 | -0.01 | 9.97E-01 | M-1 |
| ENSMMUG00000004237 | TNFRSF19  | TNF Receptor Superfamily Member 19                                                     | 8.86   | 6.22   | 0.89  | 0.18  | -0.85 | 5.58E-01 | -5.07 | 4.84E-06 | 0.59  | 8.45E-01 | M-1 |
| ENSMMUG00000014610 | RNF17     | Ring Finger Protein 17                                                                 | 27.47  | 35.28  | 6.67  | 3.10  | 0.45  | 5.59E-01 | -2.74 | 2.10E-06 | -1.06 | 2.62E-01 | M-1 |
| ENSMMUG00000014611 | CENPJ     | Centromere Protein J                                                                   | 44.26  | 61.48  | 25.49 | 16.56 | 0.28  | 6.86E-01 | -1.29 | 1.21E-02 | -0.09 | 9.64E-01 | M-1 |
| ENSMMUG00000018420 | NUP58     | Nucleoporin 58                                                                         | 52.76  | 86.97  | 48.24 | 24.23 | 0.67  | 2.00E-01 | -1.32 | 4.21E-03 | -0.61 | 4.49E-01 | M-1 |
| ENSMMUG00000016139 | FLT3      | Fms Related Tyrosine Kinase 3                                                          | 0.53   | 1.35   | 0.37  | 0.32  | 1.33  | 3.77E-01 | -3.07 | 1.81E-02 | 0.53  | 8.81E-01 | M-1 |
| ENSMMUG00000008658 | LOC721776 | Microtubule-associated Tumor Suppressor Candidate 2                                    | 19.21  | 7.77   | 1.26  | 2.87  | -0.87 | 3.16E-01 | -3.50 | 7.82E-07 | 1.23  | 2.97E-01 | M-1 |
| ENSMMUG00000004922 | KATNAL1   | Katanin Catalytic Subunit A1 Like 1                                                    | 24.89  | 39.10  | 3.89  | 1.65  | 0.08  | 9.58E-01 | -2.97 | 1.82E-03 | -1.67 | 2.66E-01 | M-1 |
| ENSMMUG00000007597 | USPL1     | Ubiquitin Specific Peptidase Like 1                                                    | 36.10  | 22.86  | 14.16 | 5.98  | -0.78 | 1.64E-01 | -1.18 | 2.21E-02 | -0.92 | 2.28E-01 | M-1 |
| ENSMMUG00000019461 | TEX26     | Testis Expressed 26                                                                    | 29.17  | 14.36  | 1.63  | 0.07  | -2.47 | 7.18E-02 | -4.46 | 6.04E-04 | -1.52 | 5.90E-01 | M-1 |
| ENSMMUG00000013713 | B3GLCT    | Beta 3-glucosyltransferase                                                             | 11.23  | 13.72  | 2.63  | 1.64  | 0.03  | 9.87E-01 | -2.55 | 3.32E-02 | 0.25  | 9.52E-01 | M-1 |
| ENSMMUG00000019831 | NBEA      | Neurobeachin                                                                           | 2.01   | 2.24   | 0.40  | 0.11  | 0.17  | 8.96E-01 | -3.64 | 6.30E-06 | -1.19 | 4.16E-01 | M-1 |
| ENSMMUG00000016791 | DCLK1     | Doublecortin Like Kinase 1                                                             | 5.32   | 5.24   | 1.95  | 0.62  | -1.00 | 5.64E-01 | -2.94 | 4.04E-02 | 0.74  | 8.32E-01 | M-1 |
| ENSMMUG00000045732 | SERTM1    | Serine Rich And Transmembrane Domain Containing 1                                      | 0.78   | 0.26   | 0.25  | 0.16  | -1.48 | 5.70E-01 | -5.36 | 1.59E-02 | 2.06  | 6.35E-01 | M-1 |
| ENSMMUG00000003590 | SUPT20H   | SPT20 Homolog, SAGA Complex Component                                                  | 41.98  | 51.44  | 23.76 | 18.14 | 0.15  | 8.79E-01 | -1.88 | 2.39E-03 | 0.91  | 3.87E-01 | M-1 |
| ENSMMUG00000002109 | PROSER1   | Proline And Serine Rich 1                                                              | 760.77 | 571.35 | 86.49 | 30.26 | -0.56 | 5.54E-01 | -3.81 | 8.71E-08 | -0.18 | 9.46E-01 | M-1 |
| ENSMMUG00000004485 | LHFPL6    | LHFPL Tetraspan Subfamily Member 6                                                     | 12.45  | 1.32   | 0.35  | 0.14  | -3.47 | 6.55E-02 | -4.37 | 3.23E-02 | 1.73  | 6.94E-01 | M-1 |
| ENSMMUG00000007884 | KBTBD6    | Kelch Repeat And BTB (POZ) Domain Containing 6                                         | 4.18   | 6.75   | 1.63  | 1.37  | 0.63  | 5.85E-01 | -2.02 | 3.08E-02 | -0.37 | 8.87E-01 | M-1 |

|                     |           |                                                                |        |       |       |       |       |          |       |          |       |          |     |
|---------------------|-----------|----------------------------------------------------------------|--------|-------|-------|-------|-------|----------|-------|----------|-------|----------|-----|
| ENSMMUG00000046229  |           |                                                                | 7.67   | 7.22  | 3.02  | 1.90  | -0.32 | 7.02E-01 | -1.60 | 1.26E-02 | -0.68 | 5.83E-01 | M-1 |
| ENSMMUG00000023083  | AKAP11    | A-kinase Anchoring Protein 11                                  | 62.16  | 46.62 | 14.15 | 7.21  | -0.72 | 3.76E-01 | -2.17 | 1.14E-03 | -0.31 | 8.63E-01 | M-1 |
| ENSMMUG00000014926  | EPST1     | Epithelial Stromal Interaction 1                               | 100.19 | 57.19 | 14.89 | 7.51  | -1.49 | 1.54E-01 | -3.40 | 1.97E-04 | 1.34  | 4.09E-01 | M-1 |
| ENSMMUG00000002330  |           |                                                                | 23.42  | 9.62  | 2.21  | 0.18  | -1.92 | 1.36E-01 | -4.29 | 1.84E-04 | -1.12 | 6.53E-01 | M-1 |
| ENSMMUG00000003753  | TSC22D1   | TSC22 Domain Family Member 1                                   | 42.72  | 29.96 | 8.21  | 4.35  | -0.36 | 7.06E-01 | -2.11 | 2.77E-03 | -1.32 | 2.20E-01 | M-1 |
| ENSMMUG00000016609  | NUFIP1    | NUFIP1, FMR1 Interacting Protein 1                             | 39.19  | 63.44 | 32.47 | 12.18 | 0.34  | 6.32E-01 | -1.17 | 3.62E-02 | -0.38 | 7.64E-01 | M-1 |
| ENSMMUG00000015667  |           |                                                                | 2.81   | 6.82  | 3.67  | 2.33  | 1.06  | 2.64E-01 | -1.98 | 1.84E-02 | 1.61  | 1.91E-01 | M-1 |
| ENSMMUG000000041756 | SIAH3     | Siah E3 Ubiquitin Protein Ligase Family Member 3               | 8.90   | 13.33 | 0.77  | 0.03  | -0.88 | 5.64E-01 | -4.15 | 4.48E-04 | -3.23 | 5.15E-02 | M-1 |
| ENSMMUG00000016293  | LRCH1     | Leucine Rich Repeats And Calponin Homology Domain Containing 1 | 77.70  | 51.38 | 11.17 | 2.35  | -0.49 | 6.85E-01 | -4.35 | 2.99E-07 | -0.55 | 8.04E-01 | M-1 |
| ENSMMUG00000016530  | NEK3      | NIMA Related Kinase 3                                          | 3.43   | 4.23  | 0.55  | 2.04  | -0.71 | 4.90E-01 | -2.77 | 7.13E-04 | 1.40  | 2.85E-01 | M-1 |
| ENSMMUG00000016401  | SUGT1     | SGT1 Homolog, MIS12 Kinetochore Complex Assembly Cochaperone   | 106.18 | 64.29 | 30.78 | 14.81 | -0.75 | 3.00E-01 | -1.29 | 4.73E-02 | -0.72 | 5.38E-01 | M-1 |
| ENSMMUG00000000784  | BORA      | Bora, Aurora Kinase A Activator                                | 10.08  | 18.03 | 7.01  | 8.40  | 0.94  | 2.69E-01 | -1.56 | 4.38E-02 | 0.00  | 1.00E+00 | M-1 |
| ENSMMUG00000001312  | LMO7      | LIM Domain 7                                                   | 11.81  | 5.29  | 0.90  | 0.56  | -1.36 | 1.76E-01 | -2.77 | 1.85E-03 | -1.28 | 4.10E-01 | M-1 |
| ENSMMUG00000000048  | SECEL     | Sciellin                                                       | 2.51   | 1.91  | 0.52  | 2.24  | -2.34 | 1.12E-01 | -3.29 | 2.27E-02 | 1.56  | 5.43E-01 | M-1 |
| ENSMMUG00000000049  | SLAIN1    | SLAIN Motif Family Member 1                                    | 6.06   | 3.99  | 4.63  | 0.61  | -0.74 | 5.76E-01 | -2.57 | 1.53E-02 | -1.23 | 5.29E-01 | M-1 |
| ENSMMUG000000005131 | EDNRB     | Endothelin Receptor Type B                                     | 2.14   | 4.02  | 0.48  | 0.44  | 0.16  | 9.45E-01 | -5.81 | 6.80E-05 | 0.45  | 9.23E-01 | M-1 |
| ENSMMUG000000037772 |           |                                                                | 2.76   | 2.13  | 0.18  | 0.03  | -1.02 | 6.11E-01 | -5.17 | 2.21E-03 | -1.24 | 7.72E-01 | M-1 |
| ENSMMUG000000011376 | GPC5      | Glypican 5                                                     | 13.83  | 5.32  | 0.49  | 0.07  | -1.45 | 3.67E-01 | -4.03 | 3.50E-03 | -3.01 | 1.43E-01 | M-1 |
| ENSMMUG000000000529 | GPC6      | Glypican 6                                                     | 19.49  | 20.67 | 1.94  | 0.48  | 0.30  | 8.51E-01 | -5.86 | 6.41E-09 | 0.56  | 8.39E-01 | M-1 |
| ENSMMUG000000046362 | SOX21     | SRY-box 21                                                     | 1.89   | 1.93  | 0.17  | 0.41  | -0.41 | 8.34E-01 | -3.30 | 1.50E-02 | 0.54  | 8.86E-01 | M-1 |
| ENSMMUG000000021807 | LOC695407 | Multidrug Resistance-associated Protein 4                      | 20.49  | 8.82  | 0.92  | 0.28  | -1.65 | 7.93E-02 | -2.97 | 5.85E-04 | -2.08 | 9.40E-02 | M-1 |
| ENSMMUG000000005839 | DZIP1     | DAZ Interacting Zinc Finger Protein 1                          | 43.12  | 16.04 | 15.69 | 0.41  | -1.69 | 5.12E-02 | -3.41 | 1.42E-05 | -1.37 | 2.96E-01 | M-1 |
| ENSMMUG000000005842 | UGGT2     | UDP-glucose Glycoprotein Glucosyltransferase 2                 | 4.42   | 6.03  | 2.17  | 0.98  | 0.31  | 7.75E-01 | -1.72 | 3.14E-02 | -0.59 | 7.34E-01 | M-1 |
| ENSMMUG00000001402  | SLC15A1   | Solute Carrier Family 15 Member 1                              | 5.01   | 2.17  | 0.11  | 0.06  | -0.63 | 7.81E-01 | -6.19 | 1.45E-04 | 0.06  | 9.93E-01 | M-1 |
| ENSMMUG00000003558  | CLYBL     | Citrate Lyase Beta Like                                        | 1.38   | 9.33  | 0.13  | 0.69  | -1.63 | 4.53E-01 | -6.77 | 4.82E-04 | 1.25  | 7.92E-01 | M-1 |
| ENSMMUG000000004494 | GGACT     | Gamma-glutamylamine Cyclotransferase                           | 3.67   | 5.28  | 3.27  | 1.43  | 1.29  | 3.21E-01 | -2.53 | 2.69E-02 | 0.66  | 8.10E-01 | M-1 |
| ENSMMUG000000015856 | NALCN     | Sodium Leak Channel, Non-selective                             | 3.06   | 1.70  | 0.05  | 0.11  | -0.62 | 6.69E-01 | -5.33 | 1.00E-06 | 0.33  | 9.28E-01 | M-1 |
| ENSMMUG000000002873 | ITGBL1    | Integrin Subunit Beta Like 1                                   | 19.73  | 7.31  | 1.46  | 0.64  | -2.09 | 1.52E-01 | -3.64 | 5.74E-03 | -1.30 | 6.29E-01 | M-1 |
| ENSMMUG000000022818 |           |                                                                | 1.38   | 5.51  | 1.18  | 1.34  | 0.73  | 6.65E-01 | -2.90 | 2.83E-02 | 0.39  | 9.19E-01 | M-1 |
| ENSMMUG000000013138 | ARHGEF7   | Rho Guanine Nucleotide Exchange Factor 7                       | 102.91 | 93.01 | 7.39  | 3.91  | -0.35 | 7.31E-01 | -3.92 | 2.47E-08 | -0.33 | 8.67E-01 | M-1 |
| ENSMMUG000000023599 | CHAMP1    | Chromosome Alignment Maintaining Phosphoprotein 1              | 50.65  | 45.44 | 17.23 | 10.63 | -0.46 | 5.51E-01 | -1.81 | 2.88E-03 | 0.27  | 8.67E-01 | M-1 |
| ENSMMUG000000019310 | DIDO1     | Death Inducer-obliterator 1                                    | 8.55   | 11.74 | 5.79  | 5.94  | 0.61  | 2.85E-01 | -1.03 | 4.32E-02 | 0.44  | 6.65E-01 | M-1 |
| ENSMMUG000000046848 | MRGBP     | MRG Domain Binding Protein                                     | 8.51   | 5.57  | 1.42  | 2.98  | -0.39 | 7.74E-01 | -2.49 | 1.04E-02 | 1.31  | 4.43E-01 | M-1 |
| ENSMMUG000000016848 | SLCO4A1   | Solute Carrier Organic Anion Transporter Family Member 4A1     | 8.68   | 10.66 | 0.37  | 0.07  | -0.01 | 9.94E-01 | -7.61 | 1.68E-11 | 0.45  | 9.02E-01 | M-1 |
| ENSMMUG000000019469 | PPP1R3D   | Protein Phosphatase 1 Regulatory Subunit 3D                    | 2.46   | 0.91  | 0.00  | 0.23  | -1.47 | 5.65E-01 | -5.25 | 1.68E-02 | 2.94  | 4.40E-01 | M-1 |
| ENSMMUG000000016294 | SYCP2     | Synaptonemal Complex Protein 2                                 | 92.75  | 44.16 | 12.90 | 1.41  | -1.14 | 1.99E-01 | -3.06 | 5.66E-05 | -1.72 | 1.28E-01 | M-1 |
| ENSMMUG000000020745 | ZNF831    | Zinc Finger Protein 831                                        | 3.10   | 3.02  | 0.07  | 0.02  | -0.31 | 8.61E-01 | -7.76 | 2.00E-11 | 0.20  | 9.65E-01 | M-1 |
| ENSMMUG000000016802 | CTCFL     | CCCTC-binding Factor Like                                      | 1.33   | 6.99  | 0.23  | 0.06  | 1.98  | 2.50E-01 | -4.58 | 1.90E-03 | 2.05  | 4.37E-01 | M-1 |



|                    |              |                                                                          |        |        |       |       |       |          |       |          |       |          |     |
|--------------------|--------------|--------------------------------------------------------------------------|--------|--------|-------|-------|-------|----------|-------|----------|-------|----------|-----|
| ENSMMUG0000007090  | DOK5         | Docking Protein 5                                                        | 4.86   | 0.47   | 0.27  | 0.11  | -2.18 | 1.10E-01 | -3.39 | 9.52E-03 | -0.42 | 9.14E-01 | M-1 |
| ENSMMUG00000020082 | BCAS1        | Breast Carcinoma Amplified Sequence 1                                    | 8.02   | 2.99   | 0.51  | 0.20  | -2.03 | 5.11E-02 | -2.88 | 4.03E-03 | -0.91 | 6.81E-01 | M-1 |
| ENSMMUG00000013035 | TSHZ2        | Teashirt Zinc Finger Homeobox 2                                          | 23.41  | 27.63  | 1.24  | 0.13  | -0.28 | 8.19E-01 | -5.17 | 2.22E-10 | -1.85 | 1.64E-01 | M-1 |
| ENSMMUG00000012657 | NFATC2       | Nuclear Factor Of Activated T-cells 2                                    | 52.48  | 70.27  | 13.57 | 2.22  | -0.19 | 8.99E-01 | -2.89 | 2.41E-03 | -1.95 | 1.68E-01 | M-1 |
| ENSMMUG00000000740 | SPATA2       | Spermatogenesis Associated 2                                             | 18.32  | 21.82  | 13.33 | 5.33  | -0.19 | 8.39E-01 | -1.72 | 7.74E-03 | 0.02  | 9.94E-01 | M-1 |
| ENSMMUG00000021692 | PTGIS        | Prostaglandin I2 Synthase                                                | 2.26   | 0.71   | 0.00  | 0.16  | -1.81 | 4.53E-01 | -6.43 | 2.56E-03 | 3.61  | 2.76E-01 | M-1 |
| ENSMMUG0000002302  | STAU1        | Staufen Double-stranded RNA Binding Protein 1                            | 160.49 | 305.86 | 72.09 | 53.68 | 0.83  | 7.40E-02 | -2.25 | 3.06E-08 | -0.11 | 9.41E-01 | M-1 |
| ENSMMUG00000015072 | PREX1        | Phosphatidylinositol-3,4,5-trisphosphate Dependent Rac Exchange Factor 1 | 5.52   | 9.98   | 1.19  | 1.62  | 0.75  | 6.11E-01 | -4.73 | 1.45E-05 | 1.51  | 4.50E-01 | M-1 |
| ENSMMUG00000010769 | EYA2         | EYA Transcriptional Coactivator And Phosphatase 2                        | 14.47  | 17.14  | 0.65  | 0.39  | -0.84 | 5.87E-01 | -4.65 | 6.97E-05 | 1.00  | 7.05E-01 | M-1 |
| ENSMMUG00000016924 | SLC13A3      | Solute Carrier Family 13 Member 3                                        | 4.97   | 3.19   | 8.06  | 0.13  | -1.33 | 3.77E-01 | -4.10 | 1.19E-03 | -0.56 | 8.75E-01 | M-1 |
| ENSMMUG00000002751 | WFDC2        | WAP Four-disulfide Core Domain 2                                         | 153.20 | 57.45  | 19.53 | 0.73  | -2.12 | 5.35E-02 | -4.28 | 1.84E-05 | -2.08 | 1.81E-01 | M-1 |
| ENSMMUG00000013212 | STK4         | Serine/threonine Kinase 4                                                | 29.81  | 18.25  | 5.85  | 6.58  | -0.69 | 3.52E-01 | -1.74 | 5.27E-03 | 0.12  | 9.58E-01 | M-1 |
| ENSMMUG00000013211 | TOMM34       | Translocase Of Outer Mitochondrial Membrane 34                           | 53.40  | 26.56  | 5.37  | 1.59  | -0.88 | 4.01E-01 | -4.21 | 4.43E-07 | -0.57 | 7.89E-01 | M-1 |
| ENSMMUG00000013209 |              |                                                                          | 12.42  | 6.55   | 2.06  | 0.19  | -2.03 | 3.23E-01 | -4.27 | 2.36E-02 | -1.89 | 6.00E-01 | M-1 |
| ENSMMUG00000017350 | RALGAPB      | Ral GTPase Activating Protein Non-catalytic Beta Subunit                 | 18.62  | 14.10  | 5.64  | 9.91  | -0.35 | 7.40E-01 | -1.62 | 3.85E-02 | 0.65  | 6.84E-01 | M-1 |
| ENSMMUG00000018923 | TTI1         | TELO2 Interacting Protein 1                                              | 8.84   | 9.51   | 3.33  | 3.21  | 0.09  | 9.25E-01 | -1.76 | 5.15E-03 | 0.57  | 6.68E-01 | M-1 |
| ENSMMUG00000017230 | VSTM2L       | V-set And Transmembrane Domain Containing 2 Like                         | 1.44   | 0.84   | 0.11  | 0.02  | -0.83 | 7.58E-01 | -5.60 | 6.32E-03 | -1.99 | 6.30E-01 | M-1 |
| ENSMMUG00000017224 | CTNBL1       | Catenin Beta Like 1                                                      | 13.48  | 22.08  | 4.77  | 4.80  | 0.54  | 5.22E-01 | -1.82 | 7.74E-03 | -0.18 | 9.35E-01 | M-1 |
| ENSMMUG00000044552 | BLCAP        | Bladder Cancer Associated Protein                                        | 216.97 | 236.66 | 31.83 | 7.97  | -0.55 | 7.08E-01 | -3.11 | 3.63E-03 | -0.58 | 8.33E-01 | M-1 |
| ENSMMUG00000008201 | NDRG3        | NDRG Family Member 3                                                     | 25.79  | 17.95  | 10.83 | 6.96  | -0.79 | 3.70E-01 | -1.58 | 4.06E-02 | -0.88 | 5.21E-01 | M-1 |
| ENSMMUG00000016448 | DLGAP4       | DLG Associated Protein 4                                                 | 17.84  | 16.56  | 4.18  | 4.72  | -0.09 | 9.27E-01 | -3.51 | 4.40E-09 | 1.00  | 3.35E-01 | M-1 |
| ENSMMUG00000023456 | ERGIC3       | ERGIC And Golgi 3                                                        | 21.36  | 15.62  | 6.67  | 4.96  | -0.17 | 8.76E-01 | -1.92 | 5.45E-03 | -0.18 | 9.39E-01 | M-1 |
| ENSMMUG00000010715 | NCOA6        | Nuclear Receptor Coactivator 6                                           | 45.08  | 39.96  | 15.60 | 11.59 | -0.30 | 6.76E-01 | -1.37 | 1.25E-02 | -0.42 | 7.29E-01 | M-1 |
| ENSMMUG00000018093 | RALY         | RALY Heterogeneous Nuclear Ribonucleoprotein                             | 51.88  | 75.36  | 20.52 | 21.71 | 0.78  | 3.49E-01 | -2.69 | 6.98E-05 | 0.37  | 8.35E-01 | M-1 |
| ENSMMUG00000023550 | E2F1         | E2F Transcription Factor 1                                               | 16.18  | 15.90  | 3.68  | 3.08  | -0.07 | 9.62E-01 | -2.34 | 1.97E-02 | -0.07 | 9.86E-01 | M-1 |
| ENSMMUG00000007121 | NOL4L        | Nucleolar Protein 4 Like                                                 | 11.50  | 17.52  | 4.57  | 0.80  | 0.21  | 8.95E-01 | -5.83 | 1.78E-09 | 1.75  | 2.78E-01 | M-1 |
| ENSMMUG00000012897 | KIF3B        | Kinesin Family Member 3B                                                 | 12.79  | 18.78  | 10.01 | 4.56  | 0.56  | 4.75E-01 | -1.41 | 3.28E-02 | -0.24 | 8.98E-01 | M-1 |
| ENSMMUG00000000118 | PLAGL2       | PLAG1 Like Zinc Finger 2                                                 | 56.15  | 42.41  | 12.02 | 4.68  | -0.43 | 6.39E-01 | -1.76 | 1.27E-02 | -0.72 | 6.02E-01 | M-1 |
| ENSMMUG00000017416 | TM9SF4       | Transmembrane 9 Superfamily Member 4                                     | 25.11  | 56.66  | 12.15 | 10.19 | 0.87  | 2.95E-01 | -2.40 | 5.87E-04 | 0.14  | 9.58E-01 | M-1 |
| ENSMMUG00000000971 | TTL9         | Tubulin Tyrosine Ligase Like 9                                           | 23.53  | 32.01  | 2.50  | 1.09  | -0.19 | 9.21E-01 | -4.64 | 1.10E-04 | -0.10 | 9.82E-01 | M-1 |
| ENSMMUG00000000270 | ANGPT4       | Angiopoietin 4                                                           | 1.92   | 0.56   | 0.02  | 0.01  | -2.71 | 1.18E-01 | -5.32 | 2.66E-03 | -0.68 | 8.98E-01 | M-1 |
| ENSMMUG00000018159 | RAD21L1      | RAD21 Cohesin Complex Component Like 1                                   | 1.84   | 0.69   | 0.11  | 0.08  | -1.67 | 2.06E-01 | -3.82 | 1.11E-03 | 1.51  | 4.88E-01 | M-1 |
| ENSMMUG00000018474 | LOC715954    | Signal-regulatory Protein Beta-1 Isoform 3                               | 7.08   | 2.29   | 0.12  | 0.01  | -1.83 | 2.65E-01 | -5.45 | 2.59E-04 | -2.96 | 2.38E-01 | M-1 |
| ENSMMUG00000017467 | C10H20orf194 | Chromosome 10 Open Reading Frame, Human C20orf194                        | 9.49   | 4.93   | 1.26  | 1.46  | -0.98 | 3.83E-01 | -2.38 | 1.28E-02 | -0.58 | 8.03E-01 | M-1 |
| ENSMMUG00000038820 |              |                                                                          | 9.61   | 10.21  | 5.13  | 3.69  | 0.12  | 9.03E-01 | -1.36 | 4.59E-02 | -0.79 | 5.13E-01 | M-1 |
| ENSMMUG00000018922 | CDC25B       | Cell Division Cycle 25B                                                  | 17.85  | 20.03  | 2.84  | 2.40  | 0.65  | 5.74E-01 | -4.15 | 2.01E-06 | -0.04 | 9.91E-01 | M-1 |
| ENSMMUG00000044575 |              |                                                                          | 26.49  | 66.98  | 0.32  | 0.80  | 0.26  | 9.11E-01 | -6.76 | 2.22E-06 | 1.83  | 5.19E-01 | M-1 |
| ENSMMUG00000004703 | RNF24        | Ring Finger Protein 24                                                   | 4.43   | 5.68   | 0.34  | 0.42  | 0.43  | 8.53E-01 | -4.08 | 1.14E-02 | 0.49  | 9.20E-01 | M-1 |
| ENSMMUG00000013722 | CHGB         | Chromogranin B                                                           | 1.59   | 0.50   | 0.03  | 0.01  | -2.03 | 2.21E-01 | -5.94 | 1.45E-04 | -0.52 | 9.17E-01 | M-1 |

|                    |           |                                                                                                   |        |        |       |       |       |          |       |          |       |          |     |
|--------------------|-----------|---------------------------------------------------------------------------------------------------|--------|--------|-------|-------|-------|----------|-------|----------|-------|----------|-----|
| ENSMMUG0000004313  | PLCB1     | Phospholipase C Beta 1                                                                            | 2.43   | 3.24   | 0.55  | 0.19  | 0.90  | 4.63E-01 | -5.13 | 1.22E-07 | 0.92  | 6.68E-01 | M-1 |
| ENSMMUG0000001012  | PLCB4     | Phospholipase C Beta 4                                                                            | 0.99   | 0.85   | 0.05  | 0.57  | -2.39 | 9.17E-02 | -5.97 | 1.24E-05 | 3.52  | 5.56E-02 | M-1 |
| ENSMMUG00000018116 | JAG1      | Jagged 1                                                                                          | 28.20  | 20.28  | 5.04  | 1.03  | -0.10 | 9.45E-01 | -3.27 | 3.16E-04 | -0.73 | 7.25E-01 | M-1 |
| ENSMMUG00000015939 | ISM1      | Isthmin 1                                                                                         | 1.84   | 0.56   | 0.11  | 0.41  | -1.27 | 4.01E-01 | -3.19 | 2.35E-02 | 2.62  | 2.09E-01 | M-1 |
| ENSMMUG00000012880 | LOC700646 | Uncharacterized LOC700646                                                                         | 113.18 | 56.19  | 20.05 | 18.32 | -1.03 | 1.89E-01 | -1.59 | 2.62E-02 | -0.56 | 7.17E-01 | M-1 |
| ENSMMUG00000022386 | NXT1      | Nuclear Transport Factor 2 Like Export Factor 1                                                   | 5.73   | 16.22  | 5.11  | 3.15  | 1.28  | 3.07E-01 | -2.50 | 2.34E-02 | 1.27  | 5.21E-01 | M-1 |
| ENSMMUG00000020858 | NANP      | N-acetylneuraminic Acid Phosphatase                                                               | 3.33   | 10.06  | 0.67  | 1.07  | 0.96  | 6.08E-01 | -4.67 | 1.10E-03 | 1.29  | 6.85E-01 | M-1 |
| ENSMMUG00000012602 |           |                                                                                                   | 23.96  | 9.10   | 1.32  | 0.31  | -1.85 | 9.84E-02 | -3.95 | 1.09E-04 | -1.03 | 6.41E-01 | M-1 |
| ENSMMUG00000044198 |           |                                                                                                   | 2.31   | 6.79   | 1.44  | 0.84  | 3.30  | 1.07E-01 | -6.38 | 9.29E-04 | 0.99  | 8.54E-01 | M-1 |
| ENSMMUG00000023263 | MED15     | Mediator Complex Subunit 15                                                                       | 84.12  | 128.11 | 19.36 | 15.18 | 0.81  | 4.06E-01 | -3.76 | 8.81E-07 | 0.27  | 9.11E-01 | M-1 |
| ENSMMUG00000041565 |           |                                                                                                   | 38.19  | 68.77  | 27.98 | 16.93 | 1.41  | 2.16E-01 | -2.32 | 2.49E-02 | -0.19 | 9.60E-01 | M-1 |
| ENSMMUG00000022977 | LOC698692 | PRAME Family Member 20-like                                                                       | 3.66   | 11.24  | 1.07  | 2.41  | 0.32  | 8.52E-01 | -2.62 | 2.79E-02 | -0.38 | 9.12E-01 | M-1 |
| ENSMMUG00000008017 | ZNF280B   | Zinc Finger Protein 280B                                                                          | 130.67 | 94.42  | 21.84 | 5.82  | -0.69 | 4.07E-01 | -2.77 | 3.10E-05 | -0.96 | 4.23E-01 | M-1 |
| ENSMMUG00000037559 | ZNF70     | Zinc Finger Protein 70                                                                            | 12.18  | 16.66  | 8.55  | 1.51  | 0.24  | 8.78E-01 | -3.12 | 1.82E-03 | -0.29 | 9.28E-01 | M-1 |
| ENSMMUG00000009098 | SMARCB1   | SWI/SNF Related, Matrix Associated, Actin Dependent Regulator Of Chromatin, Subfamily B, Member 1 | 23.58  | 29.22  | 7.34  | 9.57  | 0.92  | 4.39E-01 | -2.67 | 6.34E-03 | 0.20  | 9.56E-01 | M-1 |
| ENSMMUG00000009101 | DERL3     | Derlin 3                                                                                          | 8.58   | 4.49   | 0.16  | 0.18  | -1.44 | 2.58E-01 | -4.22 | 2.19E-04 | -1.72 | 4.24E-01 | M-1 |
| ENSMMUG00000004552 | DDT       | D-dopachrome Tautomerase                                                                          | 2.19   | 6.21   | 5.11  | 1.42  | 1.91  | 2.85E-01 | -6.57 | 2.98E-05 | 4.03  | 5.97E-02 | M-1 |
| ENSMMUG00000000262 | UPB1      | Beta-ureidopropionase 1                                                                           | 23.58  | 9.12   | 1.72  | 0.14  | -1.72 | 1.24E-01 | -3.59 | 3.39E-04 | -1.46 | 4.23E-01 | M-1 |
| ENSMMUG00000020325 | PIWIL3    | Piwi Like RNA-mediated Gene Silencing 3                                                           | 57.58  | 31.87  | 3.80  | 1.46  | -0.75 | 5.07E-01 | -3.32 | 1.55E-04 | -1.03 | 5.48E-01 | M-1 |
| ENSMMUG00000042133 |           |                                                                                                   | 21.29  | 15.96  | 5.79  | 6.46  | -0.13 | 9.15E-01 | -1.68 | 3.26E-02 | 0.34  | 8.67E-01 | M-1 |
| ENSMMUG00000001058 | TTC28     | Tetratricopeptide Repeat Domain 28                                                                | 3.54   | 2.36   | 0.17  | 0.26  | -2.22 | 1.01E-01 | -3.05 | 1.73E-02 | -0.36 | 9.28E-01 | M-1 |
| ENSMMUG00000040556 | CCDC117   | Coiled-coil Domain Containing 117                                                                 | 45.22  | 81.15  | 26.08 | 18.79 | 0.81  | 3.25E-01 | -2.06 | 3.09E-03 | 1.03  | 3.83E-01 | M-1 |
| ENSMMUG00000045556 |           |                                                                                                   | 3.11   | 1.46   | 0.26  | 1.54  | -0.49 | 8.32E-01 | -5.06 | 3.87E-03 | 2.64  | 3.36E-01 | M-1 |
| ENSMMUG00000022236 | MTMR3     | Myotubularin Related Protein 3                                                                    | 270.61 | 84.09  | 12.85 | 3.01  | -1.33 | 1.37E-01 | -3.63 | 2.76E-06 | -1.03 | 4.79E-01 | M-1 |
| ENSMMUG00000005898 | MORC2     | MORC Family CW-type Zinc Finger 2                                                                 | 7.36   | 18.16  | 4.64  | 2.51  | 1.17  | 2.20E-01 | -2.28 | 6.96E-03 | -1.15 | 4.35E-01 | M-1 |
| ENSMMUG00000022397 | RNF185    | Ring Finger Protein 185                                                                           | 15.31  | 10.63  | 1.64  | 3.52  | -0.27 | 8.67E-01 | -4.54 | 1.50E-05 | 0.67  | 8.03E-01 | M-1 |
| ENSMMUG00000031035 | EIF4ENIF1 | Eukaryotic Translation Initiation Factor 4E Nuclear Import Factor 1                               | 77.14  | 53.89  | 18.89 | 7.07  | -0.59 | 5.54E-01 | -2.43 | 1.79E-03 | -0.53 | 7.74E-01 | M-1 |
| ENSMMUG00000012011 | HMGXB4    | HMG-box Containing 4                                                                              | 24.14  | 29.32  | 9.43  | 13.06 | 0.45  | 4.71E-01 | -1.61 | 1.23E-03 | 0.45  | 6.69E-01 | M-1 |
| ENSMMUG00000044029 | C1QTNF6   | C1q And TNF Related 6                                                                             | 65.73  | 133.11 | 5.12  | 0.57  | 0.36  | 7.77E-01 | -5.35 | 2.29E-10 | -2.01 | 1.17E-01 | M-1 |
| ENSMMUG00000042076 | ELFN2     | Extracellular Leucine Rich Repeat And Fibronectin Type III Domain Containing 2                    | 2.43   | 1.77   | 1.95  | 0.02  | -0.45 | 8.17E-01 | -5.58 | 1.56E-05 | -1.16 | 6.89E-01 | M-1 |
| ENSMMUG00000003853 | GGA1      | Golgi Associated, Gamma Adaptin Ear Containing, ARF Binding Protein 1                             | 3.43   | 7.96   | 2.75  | 2.05  | 1.32  | 1.71E-01 | -2.05 | 2.01E-02 | -0.82 | 6.43E-01 | M-1 |
| ENSMMUG00000005991 | TRIOBP    | TRIO And F-actin Binding Protein                                                                  | 17.10  | 25.90  | 6.58  | 7.42  | 0.82  | 4.15E-01 | -2.75 | 7.81E-04 | 0.34  | 8.84E-01 | M-1 |
| ENSMMUG00000017680 | CBY1      | Chibby Family Member 1, Beta Catenin Antagonist                                                   | 4.18   | 18.82  | 2.02  | 2.93  | 2.03  | 7.15E-02 | -3.30 | 1.55E-03 | 0.45  | 8.75E-01 | M-1 |
| ENSMMUG00000020411 | MKL1      | Megakaryoblastic Leukemia (translocation) 1                                                       | 35.83  | 33.64  | 6.42  | 3.00  | -1.06 | 2.96E-01 | -1.92 | 3.27E-02 | -1.77 | 1.65E-01 | M-1 |
| ENSMMUG00000017371 | MCHR1     | Melanin Concentrating Hormone Receptor 1                                                          | 5.72   | 5.71   | 2.66  | 0.08  | -1.15 | 5.03E-01 | -4.66 | 2.72E-03 | -2.25 | 3.67E-01 | M-1 |
| ENSMMUG00000031010 |           |                                                                                                   | 14.27  | 11.36  | 0.83  | 0.58  | -0.52 | 7.49E-01 | -3.68 | 1.84E-03 | -1.07 | 6.85E-01 | M-1 |
| ENSMMUG00000031009 |           |                                                                                                   | 17.64  | 16.05  | 0.94  | 0.52  | -0.30 | 8.50E-01 | -3.97 | 1.80E-04 | -1.05 | 6.50E-01 | M-1 |
| ENSMMUG00000047046 | POLDIP3   | DNA Polymerase Delta Interacting Protein 3                                                        | 43.72  | 46.51  | 15.27 | 12.61 | 0.01  | 9.95E-01 | -1.95 | 2.05E-02 | -0.17 | 9.52E-01 | M-1 |

|                    |              |                                                               |       |       |       |       |       |          |       |          |       |          |     |
|--------------------|--------------|---------------------------------------------------------------|-------|-------|-------|-------|-------|----------|-------|----------|-------|----------|-----|
| ENSMMUG00000010194 | A4GALT       | Alpha 1,4-galactosyltransferase (P Blood Group)               | 17.36 | 21.60 | 7.26  | 11.69 | 0.16  | 8.83E-01 | -1.67 | 2.19E-02 | 0.59  | 7.05E-01 | M-1 |
| ENSMMUG00000008728 |              |                                                               | 2.10  | 3.16  | 0.52  | 0.44  | 2.58  | 2.23E-01 | -5.86 | 2.03E-03 | 4.27  | 1.06E-01 | M-1 |
| ENSMMUG00000005769 | EFCAB6       | EF-hand Calcium Binding Domain 6                              | 2.63  | 1.79  | 0.85  | 0.38  | -0.05 | 9.79E-01 | -2.37 | 3.51E-02 | -1.06 | 6.37E-01 | M-1 |
| ENSMMUG00000016698 | PNPLA3       | Patatin Like Phospholipase Domain Containing 3                | 1.59  | 4.78  | 0.51  | 0.51  | 1.19  | 5.57E-01 | -5.19 | 1.16E-03 | 2.16  | 4.44E-01 | M-1 |
| ENSMMUG00000015448 | PARVB        | Parvin Beta                                                   | 2.32  | 1.24  | 0.26  | 0.43  | -1.54 | 2.74E-01 | -2.63 | 4.71E-02 | -0.24 | 9.59E-01 | M-1 |
| ENSMMUG00000031000 | PRR5         | Proline Rich 5                                                | 8.02  | 9.47  | 3.30  | 10.27 | 0.18  | 8.96E-01 | -1.75 | 4.99E-02 | 2.09  | 7.06E-02 | M-1 |
| ENSMMUG00000023004 | SMC1B        | Structural Maintenance Of Chromosomes 1B                      | 2.63  | 1.90  | 0.28  | 0.41  | -1.14 | 2.96E-01 | -2.71 | 4.68E-03 | 1.03  | 5.85E-01 | M-1 |
| ENSMMUG00000023007 | RIBC2        | RIB43A Domain With Coiled-coils 2                             | 1.27  | 1.95  | 0.03  | 0.12  | -1.28 | 4.60E-01 | -4.63 | 2.73E-03 | -0.25 | 9.66E-01 | M-1 |
| ENSMMUG00000008136 | GTSE1        | G2 And S-phase Expressed 1                                    | 36.17 | 46.69 | 11.14 | 12.89 | 0.54  | 5.24E-01 | -2.36 | 3.64E-04 | -0.35 | 8.38E-01 | M-1 |
| ENSMMUG00000020993 | CELSR1       | Cadherin EGF LAG Seven-pass G-type Receptor 1                 | 12.89 | 12.82 | 1.19  | 1.22  | -0.12 | 9.34E-01 | -3.51 | 5.63E-05 | -0.85 | 6.49E-01 | M-1 |
| ENSMMUG00000009120 | MOV10L1      | Mov10 RISC Complex RNA Helicase Like 1                        | 0.97  | 4.78  | 4.15  | 0.12  | 1.83  | 1.07E-01 | -2.30 | 3.42E-02 | -2.09 | 1.89E-01 | M-1 |
| ENSMMUG00000005592 | ACR          | Acrosin                                                       | 9.21  | 11.97 | 1.32  | 0.07  | -0.33 | 8.59E-01 | -4.59 | 1.97E-04 | -3.02 | 1.25E-01 | M-1 |
| ENSMMUG00000038897 | RPH3AL       | Rabphilin 3A Like (without C2 Domains)                        | 1.38  | 0.33  | 0.02  | 0.03  | -2.26 | 2.27E-01 | -4.03 | 2.64E-02 | -0.01 | 9.99E-01 | M-1 |
| ENSMMUG00000002371 | MYO1C        | Myosin IC                                                     | 24.67 | 21.49 | 3.13  | 3.58  | -0.34 | 7.71E-01 | -3.77 | 1.57E-06 | 0.65  | 7.24E-01 | M-1 |
| ENSMMUG00000022194 | SERPINF1     | Serpin Family F Member 1                                      | 6.01  | 3.63  | 0.84  | 0.64  | -0.85 | 4.69E-01 | -2.56 | 8.65E-03 | 0.08  | 9.82E-01 | M-1 |
| ENSMMUG00000011604 | RPA1         | Replication Protein A1                                        | 9.82  | 4.99  | 2.77  | 3.53  | -1.21 | 1.02E-01 | -1.64 | 1.78E-02 | 0.82  | 5.14E-01 | M-1 |
| ENSMMUG00000023161 | SMG6         | SMG6, Nonsense Mediated MRNA Decay Factor                     | 18.64 | 24.09 | 8.43  | 8.92  | 0.55  | 3.50E-01 | -1.64 | 8.17E-04 | 0.09  | 9.63E-01 | M-1 |
| ENSMMUG00000022004 | MNT          | MAX Network Transcriptional Repressor                         | 1.92  | 4.95  | 6.85  | 5.98  | 1.95  | 8.93E-02 | -2.67 | 1.39E-02 | 0.62  | 8.13E-01 | M-1 |
| ENSMMUG00000022007 | METTL16      | Methyltransferase Like 16                                     | 53.66 | 85.30 | 20.03 | 13.44 | 0.63  | 4.67E-01 | -1.82 | 1.16E-02 | -1.15 | 3.16E-01 | M-1 |
| ENSMMUG00000023388 | SHPK         | Sedoheptulokinase                                             | 0.72  | 1.12  | 0.13  | 1.13  | 0.19  | 9.45E-01 | -3.60 | 4.50E-02 | 3.88  | 1.04E-01 | M-1 |
| ENSMMUG00000008263 | ATP2A3       | ATPase Sarcoplasmic/endoplasmic Reticulum Ca2+ Transporting 3 | 6.34  | 4.53  | 0.17  | 0.04  | -0.50 | 7.58E-01 | -5.23 | 3.46E-06 | -1.90 | 3.42E-01 | M-1 |
| ENSMMUG00000030381 | ALOX15       | Arachidonate 15-lipoxygenase                                  | 7.54  | 15.58 | 0.74  | 0.38  | 0.57  | 7.11E-01 | -6.28 | 4.52E-09 | 1.90  | 2.89E-01 | M-1 |
| ENSMMUG00000017654 | ARRB2        | Arrestin Beta 2                                               | 2.70  | 2.63  | 0.30  | 0.60  | 0.46  | 8.12E-01 | -3.78 | 5.64E-03 | 0.28  | 9.53E-01 | M-1 |
| ENSMMUG00000002409 |              |                                                               | 34.20 | 26.13 | 1.16  | 0.86  | -2.21 | 7.50E-02 | -3.08 | 8.71E-03 | -1.85 | 3.27E-01 | M-1 |
| ENSMMUG00000045311 | C16H17orf107 | Chromosome 16 Open Reading Frame, Human C17orf107             | 0.13  | 1.47  | 0.22  | 0.43  | 3.07  | 1.53E-01 | -4.46 | 2.59E-02 | 1.13  | 8.12E-01 | M-1 |
| ENSMMUG00000009175 | INCA1        | Inhibitor Of CDK, Cyclin A1 Interacting Protein 1             | 10.85 | 5.54  | 0.38  | 0.33  | -1.35 | 3.34E-01 | -4.16 | 4.82E-04 | -0.66 | 8.36E-01 | M-1 |
| ENSMMUG00000046810 | ZFP3         | ZFP3 Zinc Finger Protein                                      | 1.96  | 6.84  | 0.62  | 1.56  | 1.56  | 2.35E-01 | -3.70 | 1.06E-03 | 2.24  | 1.92E-01 | M-1 |
| ENSMMUG00000022985 | SCIMP        | SLP Adaptor And CSK Interacting Membrane Protein              | 42.65 | 79.09 | 2.33  | 0.45  | -0.08 | 9.67E-01 | -6.25 | 1.12E-07 | -0.74 | 8.13E-01 | M-1 |
| ENSMMUG00000010467 | NUP88        | Nucleoporin 88                                                | 85.60 | 48.02 | 18.94 | 15.02 | -0.95 | 8.99E-02 | -1.24 | 1.86E-02 | 0.24  | 8.58E-01 | M-1 |
| ENSMMUG00000006599 | DERL2        | Derlin 2                                                      | 17.48 | 9.99  | 4.99  | 5.79  | -0.80 | 2.29E-01 | -1.24 | 4.25E-02 | 0.16  | 9.31E-01 | M-1 |
| ENSMMUG00000030453 | NLRP1        | NLR Family Pyrin Domain Containing 1                          | 4.22  | 2.87  | 0.08  | 0.02  | -2.04 | 2.13E-01 | -3.57 | 1.95E-02 | -0.30 | 9.62E-01 | M-1 |
| ENSMMUG00000007535 | LOC713683    | Arachidonate 12-lipoxygenase, Epidermal-type-like             | 3.21  | 2.40  | 0.13  | 0.14  | -0.81 | 5.56E-01 | -5.62 | 1.31E-07 | 2.38  | 1.36E-01 | M-1 |
| ENSMMUG00000016268 | BCL6B        | B-cell CLL/lymphoma 6B                                        | 8.90  | 7.36  | 0.31  | 0.05  | 0.24  | 8.92E-01 | -5.84 | 3.05E-07 | -1.08 | 6.96E-01 | M-1 |
| ENSMMUG00000010536 | DLG4         | Discs Large MAGUK Scaffold Protein 4                          | 1.01  | 1.48  | 0.25  | 0.01  | -0.14 | 9.61E-01 | -3.71 | 4.97E-02 | -3.02 | 3.16E-01 | M-1 |
| ENSMMUG00000023616 | ZBTB4        | Zinc Finger And BTB Domain Containing 4                       | 1.02  | 2.83  | 1.04  | 0.57  | 1.41  | 4.50E-01 | -4.00 | 1.09E-02 | 1.03  | 7.82E-01 | M-1 |
| ENSMMUG00000006327 | TNFSF12      | Tumor Necrosis Factor (ligand) Superfamily, Member 12         | 10.88 | 5.19  | 0.82  | 1.11  | -1.38 | 1.71E-01 | -2.08 | 2.65E-02 | -2.24 | 7.48E-02 | M-1 |
| ENSMMUG00000013510 | FXR2         | FMR1 Autosomal Homolog 2                                      | 10.88 | 18.57 | 9.10  | 5.13  | 0.66  | 3.06E-01 | -1.21 | 3.34E-02 | -0.30 | 8.29E-01 | M-1 |

|                     |              |                                                           |        |       |       |       |       |          |       |          |       |          |     |
|---------------------|--------------|-----------------------------------------------------------|--------|-------|-------|-------|-------|----------|-------|----------|-------|----------|-----|
| ENSMMUG00000017723  | GUCY2D       | Guanylate Cyclase 2D, Retinal                             | 11.98  | 4.13  | 0.28  | 0.06  | -1.78 | 7.04E-02 | -3.51 | 1.02E-04 | -2.21 | 9.97E-02 | M-1 |
| ENSMMUG00000019850  | ALOXE3       | Arachidonate Lipoxygenase 3                               | 7.37   | 25.75 | 1.75  | 0.22  | 1.61  | 2.70E-01 | -5.40 | 1.02E-05 | -0.61 | 8.57E-01 | M-1 |
| ENSMMUG00000021798  | PER1         | Period Circadian Regulator 1                              | 4.32   | 7.96  | 1.32  | 0.33  | 1.24  | 2.84E-01 | -4.18 | 1.67E-05 | -0.78 | 7.38E-01 | M-1 |
| ENSMMUG00000021801  | VAMP2        | Vesicle Associated Membrane Protein 2                     | 5.48   | 4.61  | 0.70  | 1.29  | -0.82 | 5.00E-01 | -2.82 | 4.18E-03 | 0.93  | 6.47E-01 | M-1 |
| ENSMMUG00000023803  | MYH10        | Myosin Heavy Chain 10                                     | 68.03  | 52.73 | 6.08  | 5.52  | -0.41 | 6.32E-01 | -3.50 | 2.08E-08 | 0.30  | 8.65E-01 | M-1 |
| ENSMMUG00000005791  | PIK3R6       | Phosphoinositide-3-kinase Regulatory Subunit 6            | 2.09   | 5.82  | 0.86  | 0.50  | 1.73  | 2.65E-01 | -4.22 | 1.81E-03 | -1.12 | 7.03E-01 | M-1 |
| ENSMMUG00000005792  | PIK3R5       | Phosphoinositide-3-kinase Regulatory Subunit 5            | 3.57   | 1.30  | 0.23  | 0.09  | -1.22 | 4.77E-01 | -4.88 | 7.13E-04 | -0.65 | 8.69E-01 | M-1 |
| ENSMMUG00000045539  |              |                                                           | 22.47  | 4.87  | 0.45  | 0.97  | -2.78 | 1.27E-01 | -4.67 | 8.01E-03 | 0.79  | 8.63E-01 | M-1 |
| ENSMMUG00000041092  | RCVRN        | Recoverin                                                 | 1.07   | 1.83  | 0.00  | 0.06  | -0.25 | 9.13E-01 | -7.43 | 4.94E-06 | 2.58  | 3.46E-01 | M-1 |
| ENSMMUG00000018092  | GAS7         | Growth Arrest Specific 7                                  | 12.45  | 12.98 | 2.95  | 2.04  | 0.00  | 9.99E-01 | -5.63 | 9.96E-08 | 2.55  | 1.05E-01 | M-1 |
| ENSMMUG00000020084  | LOC717943    | Myosin-3                                                  | 3.81   | 2.01  | 0.18  | 0.15  | -1.74 | 1.75E-01 | -3.71 | 1.29E-03 | -0.64 | 8.26E-01 | M-1 |
| ENSMMUG00000013281  | MYOCD        | Myocardin                                                 | 4.28   | 3.02  | 0.05  | 0.17  | -2.44 | 9.15E-02 | -5.20 | 3.36E-04 | 0.87  | 8.02E-01 | M-1 |
| ENSMMUG00000049005  | LOC106993909 | Uncharacterized LOC106993909                              | 3.20   | 6.50  | 4.31  | 0.80  | 1.14  | 5.43E-01 | -3.97 | 1.07E-02 | 1.84  | 5.28E-01 | M-1 |
| ENSMMUG00000021091  | COPS3        | COP9 Signalosome Subunit 3                                | 13.50  | 19.28 | 9.73  | 7.10  | 0.61  | 2.27E-01 | -1.06 | 1.90E-02 | -0.51 | 5.35E-01 | M-1 |
| ENSMMUG00000018352  | ALKBH5       | AlkB Homolog 5, RNA Demethylase                           | 116.62 | 49.50 | 18.81 | 10.92 | -1.13 | 9.24E-02 | -1.90 | 1.92E-03 | -0.02 | 9.94E-01 | M-1 |
| ENSMMUG00000008536  | MAPK7        | Mitogen-activated Protein Kinase 7                        | 14.10  | 8.42  | 0.45  | 1.19  | -1.21 | 3.45E-01 | -4.44 | 2.51E-05 | 1.12  | 6.07E-01 | M-1 |
| ENSMMUG00000008538  | MFAP4        | Microfibril Associated Protein 4                          | 2.86   | 6.36  | 0.14  | 0.17  | -0.51 | 7.98E-01 | -6.94 | 8.18E-07 | 3.47  | 8.10E-02 | M-1 |
| ENSMMUG00000018581  | CCDC144NL    | Coiled-coil Domain Containing 144 Family, N-terminal Like | 2.27   | 15.11 | 0.84  | 0.18  | 2.09  | 5.31E-02 | -4.86 | 5.71E-07 | -1.76 | 2.77E-01 | M-1 |
| ENSMMUG00000019142  | TMEM97       | Transmembrane Protein 97                                  | 2.12   | 6.00  | 0.75  | 0.83  | 1.55  | 2.56E-01 | -3.05 | 1.15E-02 | 0.64  | 8.32E-01 | M-1 |
| ENSMMUG00000012239  | UNC119       | Unc-119 Lipid Binding Chaperone                           | 2.95   | 11.45 | 1.08  | 2.23  | 2.63  | 1.11E-01 | -4.57 | 2.31E-03 | 3.04  | 1.71E-01 | M-1 |
| ENSMMUG00000021554  | PHF12        | PHD Finger Protein 12                                     | 21.83  | 22.26 | 4.42  | 4.93  | -0.12 | 9.12E-01 | -2.50 | 1.86E-04 | 1.12  | 3.17E-01 | M-1 |
| ENSMMUG00000014408  | GIT1         | GIT ArfGAP 1                                              | 20.27  | 31.44 | 5.10  | 6.31  | 0.73  | 5.78E-01 | -2.49 | 1.66E-02 | 0.71  | 7.68E-01 | M-1 |
| ENSMMUG00000008605  | NF1          | Neurofibromin 1                                           | 34.58  | 29.93 | 5.14  | 8.26  | -0.09 | 9.39E-01 | -2.80 | 8.81E-05 | 0.53  | 7.53E-01 | M-1 |
| ENSMMUG00000004794  | LIG3         | DNA Ligase 3                                              | 22.68  | 28.68 | 7.45  | 14.20 | 0.47  | 5.31E-01 | -2.08 | 3.79E-04 | 0.13  | 9.50E-01 | M-1 |
| ENSMMUG000000046572 | TEX14        | Testis Expressed 14, Intercellular Bridge Forming Factor  | 2.76   | 4.77  | 1.09  | 0.14  | 0.25  | 8.76E-01 | -3.64 | 4.99E-04 | -2.05 | 2.12E-01 | M-1 |
| ENSMMUG00000004723  | VEZF1        | Vascular Endothelial Zinc Finger 1                        | 12.58  | 9.04  | 6.65  | 7.03  | -0.43 | 6.40E-01 | -1.75 | 1.39E-02 | 1.63  | 9.19E-02 | M-1 |
| ENSMMUG00000015883  |              |                                                           | 33.46  | 26.04 | 9.02  | 2.80  | -0.69 | 5.07E-01 | -2.73 | 1.42E-03 | -1.92 | 1.24E-01 | M-1 |
| ENSMMUG00000010550  | TOM1L1       | Target Of Myb1 Like 1 Membrane Trafficking Protein        | 129.44 | 83.11 | 8.99  | 3.32  | -0.64 | 4.87E-01 | -3.97 | 1.60E-08 | -0.86 | 5.41E-01 | M-1 |
| ENSMMUG00000001942  | MBTD1        | Mbt Domain Containing 1                                   | 16.46  | 30.67 | 6.45  | 6.16  | 1.34  | 6.97E-02 | -2.50 | 1.85E-04 | 0.13  | 9.58E-01 | M-1 |
| ENSMMUG00000003453  | ZNF652       | Zinc Finger Protein 652                                   | 54.82  | 25.54 | 6.64  | 9.24  | -1.16 | 1.25E-01 | -2.31 | 6.02E-04 | 1.10  | 3.24E-01 | M-1 |
| ENSMMUG000000047842 | LRRC46       | Leucine Rich Repeat Containing 46                         | 1.37   | 1.31  | 0.09  | 0.20  | 0.43  | 8.13E-01 | -4.18 | 8.67E-04 | 1.39  | 5.83E-01 | M-1 |
| ENSMMUG00000002637  | MLLT6        | MLLT6, PHD Finger Containing                              | 2.99   | 5.31  | 0.79  | 1.71  | 0.29  | 8.70E-01 | -2.54 | 3.30E-02 | 2.31  | 1.75E-01 | M-1 |
| ENSMMUG00000002944  | CWC25        | CWC25 Spliceosome Associated Protein Homolog              | 51.42  | 38.62 | 18.34 | 18.15 | -0.24 | 8.20E-01 | -1.72 | 2.30E-02 | -0.08 | 9.75E-01 | M-1 |
| ENSMMUG00000018180  | FBXO47       | F-box Protein 47                                          | 1.03   | 0.75  | 0.12  | 0.08  | -0.83 | 6.92E-01 | -5.15 | 1.87E-03 | 0.03  | 9.97E-01 | M-1 |
| ENSMMUG00000004917  | PLXDC1       | Plexin Domain Containing 1                                | 9.63   | 4.52  | 0.79  | 0.08  | -1.87 | 1.55E-01 | -3.44 | 4.16E-03 | -1.95 | 3.29E-01 | M-1 |
| ENSMMUG00000000289  | CACNB1       | Calcium Voltage-gated Channel Auxiliary Subunit Beta 1    | 2.70   | 4.96  | 1.24  | 0.22  | 0.36  | 8.34E-01 | -3.19 | 6.45E-03 | -0.34 | 9.28E-01 | M-1 |
| ENSMMUG00000020775  | GRB7         | Growth Factor Receptor Bound Protein 7                    | 33.47  | 24.48 | 0.84  | 0.82  | 0.09  | 9.52E-01 | -6.15 | 4.74E-12 | 0.34  | 9.02E-01 | M-1 |

|                     |           |                                                                   |        |        |       |       |       |          |       |          |       |          |     |
|---------------------|-----------|-------------------------------------------------------------------|--------|--------|-------|-------|-------|----------|-------|----------|-------|----------|-----|
| ENSMMUG00000017337  | IKZF3     | IKAROS Family Zinc Finger 3                                       | 0.30   | 4.61   | 0.07  | 0.04  | 3.18  | 8.75E-02 | -6.59 | 1.39E-04 | -0.06 | 9.94E-01 | M-1 |
| ENSMMUG00000004586  | ORMDL3    | ORMDL Sphingolipid Biosynthesis Regulator 3                       | 6.31   | 9.78   | 2.58  | 1.95  | -0.10 | 9.43E-01 | -2.28 | 1.18E-02 | -0.02 | 9.95E-01 | M-1 |
| ENSMMUG00000004750  | WIPF2     | WAS/WASL Interacting Protein Family Member 2                      | 87.44  | 64.50  | 19.51 | 7.61  | -0.94 | 3.64E-01 | -2.15 | 1.46E-02 | -0.84 | 6.35E-01 | M-1 |
| ENSMMUG00000004755  | CDC6      | Cell Division Cycle 6                                             | 26.12  | 44.62  | 23.20 | 21.14 | 0.74  | 5.30E-02 | -0.86 | 1.99E-02 | -0.83 | 9.68E-02 | M-1 |
| ENSMMUG00000002102  | CCR7      | C-C Motif Chemokine Receptor 7                                    | 23.86  | 20.45  | 2.93  | 0.19  | -0.47 | 7.93E-01 | -5.89 | 9.31E-07 | -0.93 | 7.59E-01 | M-1 |
| ENSMMUG000000038293 |           |                                                                   | 1.37   | 3.80   | 1.17  | 0.63  | 2.00  | 1.76E-01 | -3.00 | 2.84E-02 | -0.85 | 7.91E-01 | M-1 |
| ENSMMUG00000009887  | MLX       | MLX, MAX Dimerization Protein                                     | 7.55   | 17.12  | 5.97  | 7.96  | 1.10  | 2.62E-01 | -2.18 | 1.14E-02 | 0.37  | 8.72E-01 | M-1 |
| ENSMMUG00000006093  | EZH1      | Enhancer Of Zeste 1 Polycomb Repressive Complex 2 Subunit         | 1.07   | 3.57   | 0.38  | 0.38  | 2.03  | 1.69E-01 | -5.10 | 6.90E-05 | 1.25  | 6.48E-01 | M-1 |
| ENSMMUG000000037850 |           |                                                                   | 2.53   | 1.39   | 0.11  | 0.03  | -1.73 | 3.68E-01 | -4.75 | 6.92E-03 | 1.81  | 6.20E-01 | M-1 |
| ENSMMUG00000010433  | NBR1      | NBR1, Autophagy Cargo Receptor                                    | 11.09  | 15.02  | 7.10  | 6.36  | 0.63  | 2.20E-01 | -0.96 | 3.94E-02 | -0.12 | 9.38E-01 | M-1 |
| ENSMMUG000000032617 | MPP2      | Membrane Palmitoylated Protein 2                                  | 25.05  | 21.07  | 1.08  | 0.12  | -0.49 | 7.61E-01 | -4.02 | 3.36E-04 | -3.02 | 5.16E-02 | M-1 |
| ENSMMUG00000012658  | GPATCH8   | G-patch Domain Containing 8                                       | 38.42  | 30.77  | 13.65 | 15.97 | -0.38 | 3.85E-01 | -0.91 | 1.35E-02 | -0.05 | 9.70E-01 | M-1 |
| ENSMMUG00000005456  |           |                                                                   | 27.41  | 14.35  | 4.38  | 2.67  | -1.01 | 3.82E-01 | -2.39 | 1.53E-02 | -0.27 | 9.31E-01 | M-1 |
| ENSMMUG00000005458  | GJC1      | Gap Junction Protein Gamma 1                                      | 69.26  | 67.47  | 16.58 | 3.04  | -0.32 | 8.33E-01 | -3.82 | 1.26E-04 | 0.37  | 9.02E-01 | M-1 |
| ENSMMUG00000007859  | FMNL1     | Formin Like 1                                                     | 0.69   | 0.52   | 0.53  | 0.06  | -0.42 | 8.91E-01 | -7.18 | 5.21E-04 | 2.41  | 5.21E-01 | M-1 |
| ENSMMUG000000021932 | ARHGAP27  | Rho GTPase Activating Protein 27                                  | 13.37  | 6.51   | 1.24  | 4.09  | -1.51 | 2.79E-01 | -3.59 | 2.81E-03 | 2.81  | 9.18E-02 | M-1 |
| ENSMMUG000000004129 | KANSL1    | KAT8 Regulatory NSL Complex Subunit 1                             | 30.48  | 25.89  | 11.77 | 8.99  | -0.22 | 7.52E-01 | -1.34 | 8.42E-03 | -0.08 | 9.68E-01 | M-1 |
| ENSMMUG000000017197 | BCAS3     | BCAS3, Microtubule Associated Cell Migration Factor               | 11.91  | 16.88  | 5.17  | 6.02  | 0.38  | 7.51E-01 | -2.14 | 1.43E-02 | 0.45  | 8.37E-01 | M-1 |
| ENSMMUG000000023750 | MED13     | Mediator Complex Subunit 13                                       | 112.59 | 82.17  | 28.85 | 22.73 | -0.48 | 4.64E-01 | -1.53 | 4.44E-03 | -0.24 | 8.66E-01 | M-1 |
| ENSMMUG00000002167  | MRC2      | Mannose Receptor C Type 2                                         | 3.36   | 7.95   | 2.08  | 0.76  | 1.75  | 8.68E-02 | -2.14 | 2.83E-02 | -1.79 | 2.11E-01 | M-1 |
| ENSMMUG000000002168 | MARCH10   | Membrane Associated Ring-CH-type Finger 10                        | 2.32   | 2.57   | 0.16  | 0.09  | -0.80 | 7.69E-01 | -5.04 | 1.16E-02 | 0.28  | 9.69E-01 | M-1 |
| ENSMMUG000000016755 | LIMD2     | LIM Domain Containing 2                                           | 1.56   | 1.59   | 0.22  | 0.32  | -1.40 | 5.42E-01 | -3.93 | 4.87E-02 | 0.81  | 8.74E-01 | M-1 |
| ENSMMUG000000016762 | DDX42     | DEAD-box Helicase 42                                              | 53.44  | 44.91  | 26.92 | 16.38 | 0.05  | 9.58E-01 | -1.34 | 2.18E-02 | 0.10  | 9.63E-01 | M-1 |
| ENSMMUG000000017521 | TEX2      | Testis Expressed 2                                                | 142.47 | 147.62 | 15.94 | 9.52  | -0.01 | 9.92E-01 | -4.00 | 7.56E-11 | -0.17 | 9.40E-01 | M-1 |
| ENSMMUG000000006317 | MILR1     | Mast Cell Immunoglobulin Like Receptor 1                          | 2.44   | 7.89   | 2.93  | 1.91  | 1.82  | 1.89E-01 | -2.79 | 2.87E-02 | -0.96 | 7.27E-01 | M-1 |
| ENSMMUG000000009461 | SMURF2    | SMAD Specific E3 Ubiquitin Protein Ligase 2                       | 79.48  | 59.44  | 13.99 | 8.78  | -0.44 | 6.39E-01 | -2.21 | 1.67E-03 | -0.43 | 8.07E-01 | M-1 |
| ENSMMUG000000018830 | LOC718451 | Putative Pleckstrin Homology Domain-containing Family M Member 1P | 36.91  | 14.24  | 0.47  | 1.44  | -2.62 | 7.73E-02 | -4.36 | 2.64E-03 | 0.84  | 8.12E-01 | M-1 |
| ENSMMUG000000016371 | GNA13     | G Protein Subunit Alpha 13                                        | 91.49  | 103.78 | 30.67 | 16.43 | 0.17  | 8.75E-01 | -1.78 | 1.20E-02 | -0.76 | 5.67E-01 | M-1 |
| ENSMMUG000000039558 |           |                                                                   | 15.25  | 13.86  | 4.71  | 2.85  | -0.43 | 7.36E-01 | -1.92 | 4.84E-02 | -0.05 | 9.88E-01 | M-1 |
| ENSMMUG00000002959  | HELZ      | Helicase With Zinc Finger                                         | 33.07  | 38.26  | 15.95 | 17.40 | 0.13  | 8.46E-01 | -1.28 | 3.84E-03 | 0.23  | 8.37E-01 | M-1 |
| ENSMMUG000000007309 | WIPI1     | WD Repeat Domain, Phosphoinositide Interacting 1                  | 4.22   | 1.44   | 0.70  | 0.09  | -1.41 | 4.66E-01 | -5.45 | 1.10E-03 | -1.06 | 7.92E-01 | M-1 |
| ENSMMUG000000048426 |           |                                                                   | 6.02   | 32.09  | 0.07  | 0.05  | -1.45 | 5.27E-01 | -9.22 | 1.29E-06 | 0.06  | 9.94E-01 | M-1 |
| ENSMMUG000000037823 |           |                                                                   | 4.37   | 4.33   | 0.05  | 0.06  | 0.07  | 9.81E-01 | -7.95 | 1.28E-05 | -1.69 | 6.84E-01 | M-1 |
| ENSMMUG000000001266 | COG1      | Component Of Oligomeric Golgi Complex 1                           | 7.55   | 13.99  | 3.79  | 3.92  | 1.21  | 2.32E-01 | -2.64 | 2.84E-03 | -0.23 | 9.37E-01 | M-1 |
| ENSMMUG000000019970 | SDK2      | Sidekick Cell Adhesion Molecule 2                                 | 2.50   | 1.75   | 0.08  | 0.01  | -1.13 | 4.60E-01 | -6.43 | 3.52E-07 | -0.51 | 8.94E-01 | M-1 |
| ENSMMUG000000003981 | TTYH2     | Tweety Family Member 2                                            | 10.25  | 12.44  | 1.02  | 0.08  | -0.60 | 7.34E-01 | -4.48 | 3.86E-04 | -2.59 | 1.90E-01 | M-1 |
| ENSMMUG000000023406 | HID1      | HID1 Domain Containing                                            | 4.16   | 7.04   | 1.26  | 1.42  | -1.14 | 5.12E-01 | -3.13 | 3.08E-02 | 0.25  | 9.62E-01 | M-1 |
| ENSMMUG000000022120 | TMEM94    | Transmembrane Protein 94                                          | 7.96   | 5.19   | 0.90  | 2.09  | -1.45 | 1.39E-01 | -1.99 | 3.05E-02 | 0.43  | 8.53E-01 | M-1 |
| ENSMMUG000000001795 | SRP68     | Signal Recognition Particle 68                                    | 63.97  | 46.35  | 14.10 | 12.15 | -0.83 | 2.58E-01 | -1.44 | 2.74E-02 | -0.56 | 6.78E-01 | M-1 |

|                     |              |                                                                |        |        |       |       |       |          |       |          |       |          |     |
|---------------------|--------------|----------------------------------------------------------------|--------|--------|-------|-------|-------|----------|-------|----------|-------|----------|-----|
| ENSMMUG00000045648  | MXRA7        | Matrix Remodeling Associated 7                                 | 1.12   | 1.46   | 0.38  | 0.83  | 0.37  | 8.56E-01 | -3.65 | 8.59E-03 | 2.20  | 3.17E-01 | M-1 |
| ENSMMUG00000022994  | SEC14L1      | SEC14 Like Lipid Binding 1                                     | 52.61  | 49.05  | 13.92 | 5.86  | -0.41 | 6.74E-01 | -2.27 | 1.46E-03 | -0.48 | 7.83E-01 | M-1 |
| ENSMMUG00000008239  | DNAH17       | Dynein Axonemal Heavy Chain 17                                 | 7.89   | 5.36   | 0.79  | 0.18  | -0.65 | 5.26E-01 | -5.17 | 2.40E-11 | 0.10  | 9.74E-01 | M-1 |
| ENSMMUG00000019662  | LGALS3BP     | Galectin 3 Binding Protein                                     | 2.66   | 0.65   | 0.04  | 0.09  | -0.91 | 7.26E-01 | -6.18 | 1.96E-03 | 3.00  | 3.71E-01 | M-1 |
| ENSMMUG00000009504  | C1QTNF1      | C1q And TNF Related 1                                          | 1.86   | 2.66   | 0.19  | 0.16  | -1.56 | 4.83E-01 | -7.34 | 1.47E-04 | 1.42  | 7.56E-01 | M-1 |
| ENSMMUG00000016417  | CBX8         | Chromobox 8                                                    | 7.25   | 7.81   | 0.36  | 0.58  | -0.98 | 4.52E-01 | -3.80 | 3.11E-04 | -0.07 | 9.86E-01 | M-1 |
| ENSMMUG00000005455  | RNF213       | Ring Finger Protein 213                                        | 4.19   | 2.96   | 0.51  | 0.70  | -0.92 | 3.20E-01 | -1.68 | 4.23E-02 | -0.63 | 7.22E-01 | M-1 |
| ENSMMUG00000012818  | CCDC57       | Coiled-coil Domain Containing 57                               | 0.57   | 1.89   | 0.24  | 0.88  | 1.44  | 3.68E-01 | -3.03 | 3.26E-02 | 3.33  | 8.68E-02 | M-1 |
| ENSMMUG00000029768  | RAB40B       | RAB40B, Member RAS Oncogene Family                             | 6.51   | 1.62   | 1.19  | 0.95  | -1.43 | 2.86E-01 | -2.84 | 2.46E-02 | 0.91  | 7.44E-01 | M-1 |
| ENSMMUG00000000610  | TMEM8A       | Transmembrane Protein 8A                                       | 4.95   | 5.51   | 1.28  | 1.19  | 0.13  | 9.46E-01 | -3.43 | 6.55E-03 | 0.30  | 9.46E-01 | M-1 |
| ENSMMUG00000014213  | CACNA1H      | Calcium Voltage-gated Channel Subunit Alpha1 H                 | 2.28   | 2.05   | 0.11  | 0.10  | -0.73 | 6.15E-01 | -4.37 | 7.49E-05 | 0.66  | 8.19E-01 | M-1 |
| ENSMMUG00000018598  | IGFALS       | Insulin Like Growth Factor Binding Protein Acid Labile Subunit | 15.84  | 8.01   | 0.11  | 0.09  | -1.87 | 1.16E-01 | -5.16 | 2.39E-06 | -1.61 | 4.35E-01 | M-1 |
| ENSMMUG00000019242  | ABCA3        | ATP Binding Cassette Subfamily A Member 3                      | 1.54   | 0.92   | 0.08  | 0.14  | -2.77 | 5.93E-02 | -4.09 | 5.41E-03 | -1.34 | 6.51E-01 | M-1 |
| ENSMMUG00000039943  | ADCY9        | Adenylate Cyclase 9                                            | 9.60   | 4.14   | 1.16  | 0.46  | -1.37 | 1.45E-01 | -3.28 | 6.98E-05 | 0.54  | 7.97E-01 | M-1 |
| ENSMMUG00000007574  | SLX4         | SLX4 Structure-specific Endonuclease Subunit                   | 6.79   | 14.43  | 2.22  | 2.10  | 0.42  | 7.25E-01 | -2.36 | 6.68E-03 | -0.31 | 9.02E-01 | M-1 |
| ENSMMUG000000041487 | ZNF597       | Zinc Finger Protein 597                                        | 21.73  | 22.32  | 7.19  | 1.37  | 0.11  | 9.28E-01 | -3.38 | 4.36E-06 | -0.66 | 6.88E-01 | M-1 |
| ENSMMUG00000017969  | MEFV         | MEFV, Pysin Innate Immunity Regulator                          | 2.07   | 3.34   | 0.55  | 0.52  | -0.77 | 5.65E-01 | -3.19 | 3.26E-03 | -1.82 | 2.81E-01 | M-1 |
| ENSMMUG000000044729 | TFAP4        | Transcription Factor AP-4                                      | 21.90  | 29.76  | 3.77  | 1.57  | 0.29  | 8.51E-01 | -3.85 | 1.02E-04 | -0.92 | 6.68E-01 | M-1 |
| ENSMMUG00000015758  | GLIS2        | GLIS Family Zinc Finger 2                                      | 36.39  | 32.13  | 2.24  | 0.53  | -0.09 | 9.55E-01 | -5.22 | 7.14E-08 | -1.19 | 5.34E-01 | M-1 |
| ENSMMUG00000018631  |              |                                                                | 4.62   | 3.34   | 0.12  | 0.77  | -0.60 | 7.13E-01 | -5.41 | 6.86E-06 | 1.49  | 5.10E-01 | M-1 |
| ENSMMUG0000001888   | MGRN1        | Mahogunin Ring Finger 1                                        | 32.51  | 29.33  | 3.79  | 5.91  | -0.46 | 7.02E-01 | -2.72 | 2.19E-03 | -0.18 | 9.57E-01 | M-1 |
| ENSMMUG00000017822  | PPL          | Periplakin                                                     | 12.26  | 6.30   | 0.42  | 1.53  | -1.67 | 6.12E-02 | -2.94 | 3.50E-04 | 0.32  | 8.98E-01 | M-1 |
| ENSMMUG00000023777  | TMEM114      | Transmembrane Protein 114                                      | 1.01   | 3.43   | 0.07  | 0.00  | 1.78  | 5.65E-01 | -7.35 | 4.82E-03 | -0.48 | 9.61E-01 | M-1 |
| ENSMMUG000000047806 | CARHSP1      | Calcium Regulated Heat Stable Protein 1                        | 9.45   | 7.68   | 3.52  | 3.51  | 0.19  | 8.82E-01 | -1.82 | 3.18E-02 | 0.46  | 8.19E-01 | M-1 |
| ENSMMUG000000045537 |              |                                                                | 1.85   | 19.49  | 0.99  | 0.54  | 3.06  | 5.40E-02 | -7.94 | 1.41E-06 | 2.95  | 2.70E-01 | M-1 |
| ENSMMUG00000010142  | GRIN2A       | Glutamate Ionotropic Receptor NMDA Type Subunit 2A             | 2.97   | 1.05   | 0.02  | 0.01  | -3.02 | 7.56E-02 | -5.64 | 1.72E-03 | -1.03 | 8.21E-01 | M-1 |
| ENSMMUG000000005913 | ATF7IP2      | Activating Transcription Factor 7 Interacting Protein 2        | 22.80  | 18.32  | 3.80  | 2.49  | -0.73 | 4.01E-01 | -2.25 | 1.58E-03 | 0.00  | 1.00E+00 | M-1 |
| ENSMMUG000000006515 | CLEC16A      | C-type Lectin Domain Containing 16A                            | 4.17   | 8.09   | 2.52  | 3.92  | 1.24  | 2.62E-01 | -2.45 | 1.19E-02 | 1.07  | 5.57E-01 | M-1 |
| ENSMMUG00000022897  | SNX29        | Sorting Nexin 29                                               | 10.95  | 11.07  | 2.92  | 1.67  | 0.70  | 5.10E-01 | -2.39 | 5.01E-03 | -0.47 | 8.28E-01 | M-1 |
| ENSMMUG000000037564 |              |                                                                | 3.63   | 3.54   | 1.03  | 3.70  | 0.55  | 7.42E-01 | -2.92 | 2.13E-02 | 1.45  | 5.35E-01 | M-1 |
| ENSMMUG00000013837  | SHISA9       | Shisa Family Member 9                                          | 1.98   | 4.19   | 0.02  | 0.00  | 0.98  | 7.49E-01 | -9.99 | 1.36E-05 | -1.32 | 8.29E-01 | M-1 |
| ENSMMUG00000017379  | MKL2         | MKL1/myocardin Like 2                                          | 39.38  | 51.53  | 5.95  | 13.36 | 0.18  | 8.83E-01 | -2.85 | 1.25E-04 | 0.53  | 7.71E-01 | M-1 |
| ENSMMUG00000002989  | NTAN1        | N-terminal Asparagine Amidase                                  | 333.61 | 233.18 | 46.45 | 24.35 | -0.73 | 3.57E-01 | -3.10 | 1.09E-06 | -0.66 | 6.22E-01 | M-1 |
| ENSMMUG00000002984  | PDXDC1       | Pyridoxal Dependent Decarboxylase Domain Containing 1          | 21.07  | 15.48  | 4.70  | 5.75  | -0.53 | 6.15E-01 | -2.14 | 9.38E-03 | 0.18  | 9.49E-01 | M-1 |
| ENSMMUG00000010366  | NDE1         | NudE Neurodevelopment Protein 1                                | 31.89  | 24.21  | 3.25  | 1.54  | -0.30 | 8.02E-01 | -3.72 | 3.66E-06 | -0.46 | 8.28E-01 | M-1 |
| ENSMMUG00000010367  | MYH11        | Myosin Heavy Chain 11                                          | 6.26   | 6.73   | 0.53  | 0.39  | -0.07 | 9.64E-01 | -5.16 | 8.63E-08 | 0.61  | 8.05E-01 | M-1 |
| ENSMMUG000000005914 | ABCC1        | ATP Binding Cassette Subfamily C Member 1                      | 20.74  | 33.54  | 10.82 | 5.23  | 0.12  | 9.02E-01 | -1.66 | 6.27E-03 | -1.24 | 1.65E-01 | M-1 |
| ENSMMUG00000017131  | XYLT1        | Xylosyltransferase 1                                           | 7.33   | 4.22   | 0.30  | 0.78  | -0.45 | 7.99E-01 | -4.39 | 2.59E-04 | 1.75  | 4.09E-01 | M-1 |
| ENSMMUG00000013329  | TMC5         | Transmembrane Channel Like 5                                   | 2.94   | 3.16   | 0.44  | 0.98  | -0.17 | 8.94E-01 | -2.82 | 4.88E-04 | -0.49 | 8.10E-01 | M-1 |
| ENSMMUG000000048230 | LOC106994964 | Uncharacterized LOC106994964                                   | 26.54  | 6.49   | 0.07  | 0.09  | -2.23 | 2.46E-01 | -5.54 | 2.92E-03 | -0.45 | 9.48E-01 | M-1 |

|                    |          |                                                                       |        |        |       |       |       |          |       |          |       |          |     |
|--------------------|----------|-----------------------------------------------------------------------|--------|--------|-------|-------|-------|----------|-------|----------|-------|----------|-----|
| ENSMMUG00000016763 | ANKS4B   | Ankyrin Repeat And Sterile Alpha Motif Domain Containing 4B           | 4.13   | 1.42   | 0.42  | 0.11  | -1.13 | 4.91E-01 | -6.72 | 2.56E-06 | 1.56  | 5.62E-01 | M-1 |
| ENSMMUG00000043703 |          |                                                                       | 5.69   | 2.86   | 0.11  | 0.06  | -1.12 | 5.60E-01 | -6.87 | 5.01E-05 | 0.39  | 9.50E-01 | M-1 |
| ENSMMUG00000017725 | EEF2K    | Eukaryotic Elongation Factor 2 Kinase                                 | 11.83  | 13.60  | 2.10  | 2.14  | 0.51  | 6.30E-01 | -3.30 | 2.21E-05 | -0.33 | 8.83E-01 | M-1 |
| ENSMMUG00000039788 | UBFD1    | Ubiquitin Family Domain Containing 1                                  | 33.15  | 15.53  | 3.16  | 4.79  | -1.03 | 3.15E-01 | -2.20 | 1.32E-02 | 0.29  | 9.10E-01 | M-1 |
| ENSMMUG00000005942 | LCMT1    | Leucine Carboxyl Methyltransferase 1                                  | 15.33  | 13.31  | 5.25  | 6.44  | 0.29  | 8.22E-01 | -2.19 | 1.53E-02 | 0.41  | 8.62E-01 | M-1 |
| ENSMMUG00000010470 | ZKSCAN2  | Zinc Finger With KRAB And SCAN Domains 2                              | 31.01  | 19.19  | 1.49  | 0.29  | -1.79 | 6.49E-02 | -3.49 | 7.23E-05 | -1.56 | 2.78E-01 | M-1 |
| ENSMMUG00000039690 |          |                                                                       | 0.79   | 0.57   | 0.13  | 0.24  | -0.53 | 8.41E-01 | -4.69 | 1.76E-02 | 0.33  | 9.63E-01 | M-1 |
| ENSMMUG00000015832 |          |                                                                       | 6.11   | 25.03  | 5.00  | 9.20  | 2.43  | 7.20E-02 | -3.29 | 1.16E-02 | 1.31  | 6.20E-01 | M-1 |
| ENSMMUG00000015570 | KIAA0556 | KIAA0556 Ortholog                                                     | 1.53   | 2.75   | 0.58  | 1.17  | 0.81  | 5.99E-01 | -2.65 | 3.25E-02 | 0.49  | 8.83E-01 | M-1 |
| ENSMMUG00000003298 | ATXN2L   | Ataxin 2 Like                                                         | 219.84 | 297.32 | 53.02 | 35.95 | 0.42  | 6.01E-01 | -2.86 | 1.28E-06 | -0.23 | 8.95E-01 | M-1 |
| ENSMMUG00000042206 |          |                                                                       | 7.31   | 6.06   | 5.69  | 0.43  | 0.97  | 5.81E-01 | -4.54 | 1.57E-03 | -0.26 | 9.64E-01 | M-1 |
| ENSMMUG00000000982 | PPP4C    | Protein Phosphatase 4 Catalytic Subunit                               | 45.59  | 37.88  | 13.59 | 18.91 | -0.19 | 8.61E-01 | -1.68 | 2.39E-02 | 0.30  | 8.83E-01 | M-1 |
| ENSMMUG00000018985 | CDIPT    | CDP-diacylglycerol--inositol 3-phosphatidyltransferase                | 6.43   | 28.02  | 10.06 | 9.26  | 1.87  | 6.46E-02 | -1.96 | 4.78E-02 | 0.34  | 9.02E-01 | M-1 |
| ENSMMUG00000038374 | KCTD13   | Potassium Channel Tetramerization Domain Containing 13                | 8.74   | 13.22  | 1.70  | 0.32  | 0.24  | 8.80E-01 | -4.16 | 2.87E-05 | -0.54 | 8.38E-01 | M-1 |
| ENSMMUG00000001121 | ZNF689   | Zinc Finger Protein 689                                               | 8.09   | 9.01   | 2.94  | 1.04  | 0.47  | 7.16E-01 | -2.29 | 1.81E-02 | -0.71 | 7.46E-01 | M-1 |
| ENSMMUG00000007400 | SIAH1    | Siah E3 Ubiquitin Protein Ligase 1                                    | 61.95  | 139.47 | 40.84 | 13.41 | 1.16  | 1.19E-01 | -1.88 | 5.40E-03 | -1.30 | 1.99E-01 | M-1 |
| ENSMMUG00000019868 | NKD1     | Naked Cuticle Homolog 1                                               | 16.35  | 17.09  | 0.80  | 0.13  | 0.02  | 9.87E-01 | -3.94 | 3.06E-05 | -1.95 | 2.19E-01 | M-1 |
| ENSMMUG00000020580 | RPGRIP1L | RPGRIP1 Like                                                          | 7.04   | 9.21   | 1.87  | 2.08  | 0.57  | 5.59E-01 | -2.32 | 2.66E-03 | -0.13 | 9.66E-01 | M-1 |
| ENSMMUG00000039036 | GNAO1    | G Protein Subunit Alpha O1                                            | 0.89   | 1.69   | 0.04  | 0.03  | 1.32  | 4.29E-01 | -5.78 | 3.12E-05 | -0.05 | 9.93E-01 | M-1 |
| ENSMMUG00000038955 | NUDT21   | Nudix Hydrolase 21                                                    | 39.41  | 70.09  | 26.04 | 28.38 | 1.22  | 1.98E-01 | -1.84 | 3.48E-02 | 0.47  | 8.20E-01 | M-1 |
| ENSMMUG00000017563 | CETP     | Cholesteryl Ester Transfer Protein                                    | 2.72   | 1.16   | 0.02  | 0.01  | -2.80 | 2.81E-01 | -8.51 | 3.15E-04 | -1.89 | 7.32E-01 | M-1 |
| ENSMMUG00000020350 | CPNE2    | Copine 2                                                              | 40.30  | 26.18  | 8.12  | 12.47 | -0.69 | 5.96E-01 | -2.87 | 4.27E-03 | 1.54  | 3.54E-01 | M-1 |
| ENSMMUG00000013492 | FAM192A  | Family With Sequence Similarity 192 Member A                          | 50.86  | 63.01  | 14.43 | 13.28 | -0.03 | 9.79E-01 | -2.33 | 2.54E-03 | -0.27 | 9.05E-01 | M-1 |
| ENSMMUG00000015692 | DRC7     | Dynein Regulatory Complex Subunit 7                                   | 3.40   | 1.91   | 0.07  | 0.09  | -1.38 | 2.30E-01 | -4.53 | 1.13E-05 | -0.62 | 8.15E-01 | M-1 |
| ENSMMUG00000018340 | CNGB1    | Cyclic Nucleotide Gated Channel Beta 1                                | 3.04   | 1.28   | 0.08  | 0.03  | -1.19 | 5.59E-01 | -5.16 | 1.66E-03 | 0.33  | 9.57E-01 | M-1 |
| ENSMMUG00000018491 |          |                                                                       | 74.52  | 120.64 | 76.46 | 57.02 | 1.08  | 1.22E-01 | -1.45 | 2.62E-02 | -0.30 | 8.58E-01 | M-1 |
| ENSMMUG00000023525 | CDH5     | Cadherin 5                                                            | 4.34   | 4.63   | 0.32  | 0.81  | -0.24 | 9.13E-01 | -6.87 | 3.35E-07 | 3.59  | 5.59E-02 | M-1 |
| ENSMMUG00000008034 | HSD11B2  | Hydroxysteroid 11-beta Dehydrogenase 2                                | 5.60   | 0.48   | 0.20  | 0.54  | -2.32 | 2.19E-01 | -3.76 | 4.23E-02 | 2.30  | 4.56E-01 | M-1 |
| ENSMMUG00000029105 | ATP6VOD1 | ATPase H+ Transporting VO Subunit D1                                  | 25.19  | 19.32  | 13.61 | 11.35 | -0.36 | 8.02E-01 | -2.98 | 2.40E-03 | 2.12  | 1.35E-01 | M-1 |
| ENSMMUG00000017105 | RIPOR1   | RHO Family Interacting Cell Polarization Regulator 1                  | 23.29  | 35.31  | 0.96  | 0.99  | 0.72  | 6.23E-01 | -5.83 | 3.65E-08 | 1.42  | 4.84E-01 | M-1 |
| ENSMMUG00000007802 | CENPT    | Centromere Protein T                                                  | 4.18   | 4.85   | 1.41  | 1.49  | -0.31 | 7.98E-01 | -1.91 | 2.98E-02 | -0.57 | 7.75E-01 | M-1 |
| ENSMMUG00000029101 |          |                                                                       | 2.73   | 1.32   | 0.17  | 0.68  | -1.73 | 2.97E-01 | -3.29 | 2.94E-02 | 3.75  | 6.10E-02 | M-1 |
| ENSMMUG00000019496 | SMPD3    | Sphingomyelin Phosphodiesterase 3                                     | 60.10  | 25.54  | 5.98  | 0.73  | -1.27 | 2.48E-01 | -4.04 | 1.19E-05 | -1.83 | 2.07E-01 | M-1 |
| ENSMMUG00000010393 | CDH3     | Cadherin 3                                                            | 111.86 | 72.73  | 17.70 | 6.36  | -0.30 | 7.47E-01 | -2.80 | 1.22E-05 | -1.23 | 2.24E-01 | M-1 |
| ENSMMUG00000020415 | IL34     | Interleukin 34                                                        | 23.49  | 8.10   | 2.32  | 0.34  | -0.85 | 4.80E-01 | -3.53 | 2.30E-04 | -1.02 | 5.99E-01 | M-1 |
| ENSMMUG00000020416 |          |                                                                       | 1.50   | 27.80  | 5.08  | 4.48  | 2.71  | 5.61E-02 | -2.77 | 4.65E-02 | 0.09  | 9.86E-01 | M-1 |
| ENSMMUG00000016717 | PKD1L3   | Polycystin 1 Like 3, Transient Receptor Potential Channel Interacting | 10.71  | 30.40  | 2.12  | 0.56  | 0.78  | 5.59E-01 | -4.99 | 5.71E-07 | -0.46 | 8.73E-01 | M-1 |
| ENSMMUG00000009688 | IST1     | IST1, ESCRT-III Associated Factor                                     | 10.33  | 27.41  | 7.97  | 10.22 | 1.46  | 1.26E-01 | -2.04 | 2.15E-02 | 0.53  | 8.02E-01 | M-1 |
| ENSMMUG00000016716 | ZNF821   | Zinc Finger Protein 821                                               | 6.53   | 2.70   | 0.42  | 0.30  | -0.90 | 5.27E-01 | -3.74 | 1.33E-03 | 0.13  | 9.76E-01 | M-1 |
| ENSMMUG00000048077 | ATXN1L   | Ataxin 1 Like                                                         | 20.08  | 21.98  | 6.40  | 4.79  | 0.25  | 7.97E-01 | -2.18 | 1.15E-03 | -0.30 | 8.73E-01 | M-1 |

|                      |              |                                                                        |        |        |       |       |       |          |       |          |       |          |     |
|----------------------|--------------|------------------------------------------------------------------------|--------|--------|-------|-------|-------|----------|-------|----------|-------|----------|-----|
| ENSMMUG00000023147   | PDPR         | Pyruvate Dehydrogenase Phosphatase Regulatory Subunit                  | 25.61  | 10.35  | 3.28  | 3.75  | -1.76 | 7.98E-02 | -2.38 | 1.17E-02 | 0.29  | 9.17E-01 | M-1 |
| ENSMMUG00000008378   | MLKL         | Mixed Lineage Kinase Domain Like Pseudokinase                          | 8.98   | 9.00   | 0.16  | 0.07  | -0.80 | 5.84E-01 | -6.34 | 6.83E-08 | -0.56 | 8.65E-01 | M-1 |
| ENSMMUG00000001564   | TMEM231      | Transmembrane Protein 231                                              | 5.15   | 2.09   | 1.48  | 0.85  | -1.00 | 3.38E-01 | -2.06 | 2.35E-02 | -0.60 | 7.78E-01 | M-1 |
| ENSMMUG00000005756   | TERF2IP      | TERF2 Interacting Protein                                              | 27.55  | 38.72  | 14.26 | 4.89  | 0.58  | 5.84E-01 | -2.11 | 1.21E-02 | 0.26  | 9.18E-01 | M-1 |
| ENSMMUG00000000824   | ADAMTS18     | ADAM Metallopeptidase With Thrombospondin Type 1 Motif 18              | 9.69   | 3.69   | 0.54  | 0.11  | -1.48 | 2.86E-01 | -3.53 | 3.70E-03 | -1.06 | 7.01E-01 | M-1 |
| ENSMMUG00000010610   | WWOX         | WW Domain Containing Oxidoreductase                                    | 6.51   | 2.85   | 1.50  | 0.99  | -1.21 | 3.91E-01 | -3.70 | 1.96E-03 | 0.60  | 8.49E-01 | M-1 |
| ENSMMUG000000037756  |              |                                                                        | 1.37   | 1.25   | 0.05  | 0.11  | -1.52 | 5.52E-01 | -5.09 | 2.13E-02 | 1.23  | 8.23E-01 | M-1 |
| ENSMMUG00000047071   | BCO1         | Beta-carotene Oxygenase 1                                              | 10.96  | 8.39   | 1.04  | 1.70  | -0.88 | 4.95E-01 | -4.21 | 4.04E-05 | 2.16  | 1.66E-01 | M-1 |
| ENSMMUG000000020372  | SDR42E1      | Short Chain Dehydrogenase/reductase Family 42E, Member 1               | 1.27   | 1.37   | 0.23  | 1.31  | 0.80  | 7.30E-01 | -3.97 | 2.69E-02 | 4.21  | 7.98E-02 | M-1 |
| ENSMMUG000000020114  | CDH13        | Cadherin 13                                                            | 5.13   | 2.97   | 0.77  | 0.09  | -1.26 | 4.97E-01 | -4.82 | 1.47E-03 | 1.01  | 7.85E-01 | M-1 |
| ENSMMUG000000029070  | SLC38A8      | Solute Carrier Family 38 Member 8                                      | 0.78   | 1.65   | 0.02  | 0.03  | 0.12  | 9.73E-01 | -5.73 | 2.20E-02 | 1.49  | 8.06E-01 | M-1 |
| ENSMMUG000000008568  | DNAAF1       | Dynein Axonemal Assembly Factor 1                                      | 9.99   | 3.38   | 0.13  | 0.11  | -1.70 | 3.68E-01 | -5.02 | 1.72E-03 | 0.53  | 9.12E-01 | M-1 |
| ENSMMUG000000008569  | TAF1C        | TATA-box Binding Protein Associated Factor, RNA Polymerase I Subunit C | 2.43   | 5.21   | 1.37  | 0.93  | 1.25  | 3.68E-01 | -4.19 | 2.41E-04 | 1.12  | 6.42E-01 | M-1 |
| ENSMMUG000000019188  | ADAD2        | Adenosine Deaminase Domain Containing 2                                | 4.21   | 0.57   | 0.07  | 0.03  | -2.67 | 1.14E-01 | -3.75 | 2.58E-02 | -0.59 | 9.03E-01 | M-1 |
| ENSMMUG000000013542  | ATP2C2       | ATPase Secretory Pathway Ca2+ Transporting 2                           | 15.99  | 8.60   | 0.71  | 0.21  | -1.20 | 3.68E-01 | -5.66 | 1.62E-07 | 1.41  | 5.00E-01 | M-1 |
| ENSMMUG000000008125  | IRF8         | Interferon Regulatory Factor 8                                         | 51.30  | 20.12  | 2.35  | 0.23  | -1.63 | 1.57E-01 | -3.36 | 1.07E-03 | -1.59 | 3.72E-01 | M-1 |
| ENSMMUG000000017615  | ZCCHC14      | Zinc Finger CCHC-type Containing 14                                    | 21.52  | 23.23  | 4.49  | 2.09  | -0.09 | 9.43E-01 | -2.60 | 1.13E-03 | 0.17  | 9.51E-01 | M-1 |
| ENSMMUG000000022867  | KLHDC4       | Kelch Domain Containing 4                                              | 8.36   | 10.21  | 5.19  | 5.70  | 0.04  | 9.64E-01 | -1.20 | 3.95E-02 | 0.21  | 8.97E-01 | M-1 |
| ENSMMUG000000009473  | BANP         | BTG3 Associated Nuclear Protein                                        | 29.77  | 12.38  | 5.25  | 4.39  | -1.46 | 1.37E-01 | -1.87 | 4.30E-02 | -0.44 | 8.52E-01 | M-1 |
| ENSMMUG000000003485  | RNMT         | RNA Guanine-7 Methyltransferase                                        | 47.56  | 41.36  | 25.55 | 19.06 | 0.13  | 8.52E-01 | -1.06 | 2.41E-02 | -0.31 | 7.72E-01 | M-1 |
| ENSMMUG000000000768  | PTPRM        | Protein Tyrosine Phosphatase, Receptor Type M                          | 31.18  | 17.48  | 3.42  | 0.86  | -1.16 | 1.75E-01 | -2.21 | 3.90E-03 | -1.76 | 1.02E-01 | M-1 |
| ENSMMUG000000014506  | ARHGAP28     | Rho GTPase Activating Protein 28                                       | 4.52   | 4.57   | 2.72  | 0.44  | 0.23  | 9.09E-01 | -5.20 | 2.88E-05 | 2.50  | 2.03E-01 | M-1 |
| ENSMMUG000000047427  |              |                                                                        | 2.75   | 2.60   | 0.06  | 0.03  | 0.29  | 9.13E-01 | -5.58 | 1.89E-03 | -1.17 | 8.04E-01 | M-1 |
| ENSMMUG000000019892  | MYOM1        | Myomesin 1                                                             | 1.39   | 1.79   | 0.49  | 0.11  | 0.44  | 8.28E-01 | -3.00 | 3.88E-02 | -1.01 | 7.56E-01 | M-1 |
| ENSMMUG000000043548  | LOC106994438 | Uncharacterized LOC106994438                                           | 8.48   | 10.20  | 0.15  | 0.03  | -0.51 | 8.02E-01 | -6.07 | 6.44E-05 | -1.58 | 6.24E-01 | M-1 |
| ENSMMUG000000004660  | USP14        | Ubiquitin Specific Peptidase 14                                        | 44.38  | 45.89  | 26.64 | 27.15 | 0.11  | 8.96E-01 | -1.18 | 3.75E-02 | 0.36  | 7.82E-01 | M-1 |
| ENSMMUG000000003974  | GREB1L       | Growth Regulation By Estrogen In Breast Cancer 1 Like                  | 8.39   | 7.38   | 2.14  | 3.21  | 0.10  | 9.48E-01 | -2.37 | 1.37E-02 | 1.79  | 2.09E-01 | M-1 |
| ENSMMUG000000012987  | ESCO1        | Establishment Of Sister Chromatid Cohesion N-acetyltransferase 1       | 36.70  | 35.50  | 16.99 | 11.80 | 0.07  | 9.29E-01 | -1.57 | 1.22E-03 | 0.26  | 8.38E-01 | M-1 |
| ENSMMUG000000041127  |              |                                                                        | 36.61  | 15.49  | 1.54  | 0.24  | -2.67 | 7.06E-02 | -4.03 | 5.16E-03 | -0.91 | 8.12E-01 | M-1 |
| ENSMMUG000000021480  | WDR98        | WD Repeat Domain 98                                                    | 95.73  | 45.25  | 11.16 | 6.95  | -0.76 | 4.12E-01 | -2.86 | 1.33E-04 | -0.09 | 9.75E-01 | M-1 |
| ENSMMUG000000004343  | TTC39C       | Tetratricopeptide Repeat Domain 39C                                    | 5.99   | 2.52   | 0.28  | 0.18  | -1.26 | 2.10E-01 | -2.86 | 1.42E-03 | -0.77 | 7.10E-01 | M-1 |
| ENSMMUG000000004346  | CABYR        | Calcium Binding Tyrosine Phosphorylation Regulated                     | 133.44 | 149.79 | 34.91 | 6.87  | 0.07  | 9.49E-01 | -3.25 | 1.32E-06 | -1.37 | 1.95E-01 | M-1 |
| ENSMMUG000000008600  | ZNF521       | Zinc Finger Protein 521                                                | 1.50   | 0.38   | 0.01  | 0.02  | -2.33 | 8.12E-02 | -5.51 | 6.53E-05 | 2.01  | 4.36E-01 | M-1 |
| ENSMMUG0000000038139 |              |                                                                        | 10.47  | 5.95   | 0.60  | 0.19  | -1.46 | 5.86E-01 | -5.25 | 1.74E-02 | 1.92  | 6.90E-01 | M-1 |
| ENSMMUG000000011801  | CHST9        | Carbohydrate Sulfotransferase 9                                        | 8.23   | 3.29   | 0.39  | 0.08  | -1.79 | 1.71E-01 | -3.89 | 9.92E-04 | -0.47 | 8.96E-01 | M-1 |



|                    |          |                                                                 |        |        |       |       |       |          |       |          |       |          |     |
|--------------------|----------|-----------------------------------------------------------------|--------|--------|-------|-------|-------|----------|-------|----------|-------|----------|-----|
| ENSMMUG00000018006 | TRAPPC8  | Trafficking Protein Particle Complex 8                          | 81.30  | 76.26  | 30.10 | 24.13 | -0.43 | 6.27E-01 | -1.66 | 1.49E-02 | 0.47  | 7.63E-01 | M-1 |
| ENSMMUG00000014451 | ASXL3    | Additional Sex Combs Like 3, Transcriptional Regulator          | 7.97   | 4.87   | 0.60  | 0.07  | -0.93 | 5.16E-01 | -4.59 | 3.89E-05 | -1.35 | 5.37E-01 | M-1 |
| ENSMMUG00000017276 | NOL4     | Nucleolar Protein 4                                             | 4.65   | 3.80   | 0.84  | 0.33  | -0.46 | 7.59E-01 | -2.48 | 2.38E-02 | 0.44  | 8.87E-01 | M-1 |
| ENSMMUG00000003302 | DTNA     | Dystrobrevin Alpha                                              | 3.90   | 2.64   | 0.05  | 0.16  | -0.88 | 6.06E-01 | -5.40 | 6.00E-05 | 1.20  | 6.84E-01 | M-1 |
| ENSMMUG00000018784 | SLC39A6  | Solute Carrier Family 39 Member 6                               | 15.28  | 8.14   | 2.13  | 0.95  | -0.82 | 3.60E-01 | -2.15 | 4.28E-03 | -1.01 | 4.52E-01 | M-1 |
| ENSMMUG00000041664 |          |                                                                 | 0.67   | 2.78   | 0.43  | 0.03  | 2.17  | 2.59E-01 | -5.21 | 2.64E-03 | -1.55 | 6.86E-01 | M-1 |
| ENSMMUG00000038452 |          |                                                                 | 60.27  | 88.74  | 23.10 | 0.58  | 0.01  | 9.95E-01 | -5.87 | 1.18E-09 | -1.27 | 5.11E-01 | M-1 |
| ENSMMUG00000040513 |          |                                                                 | 179.73 | 172.45 | 80.65 | 36.15 | -0.12 | 8.84E-01 | -1.64 | 1.94E-03 | -0.55 | 5.99E-01 | M-1 |
| ENSMMUG00000002742 | ST8SIA5  | ST8 Alpha-N-acetylneuraminidase Alpha-2,8-sialyltransferase 5   | 2.22   | 4.10   | 0.13  | 0.05  | 0.08  | 9.83E-01 | -7.64 | 1.24E-03 | -0.42 | 9.63E-01 | M-1 |
| ENSMMUG00000007816 | SMAD2    | SMAD Family Member 2                                            | 166.20 | 62.76  | 31.90 | 18.42 | -1.08 | 1.04E-01 | -1.51 | 1.47E-02 | -0.30 | 8.52E-01 | M-1 |
| ENSMMUG00000022472 | MRO      | Maestro                                                         | 2.47   | 1.32   | 0.79  | 0.37  | -0.29 | 8.77E-01 | -3.11 | 1.47E-02 | 1.21  | 6.32E-01 | M-1 |
| ENSMMUG00000013999 | DCC      | DCC Netrin 1 Receptor                                           | 2.24   | 1.35   | 0.41  | 0.04  | -2.15 | 1.64E-01 | -3.67 | 1.32E-02 | -2.98 | 1.79E-01 | M-1 |
| ENSMMUG00000038563 |          |                                                                 | 4.73   | 4.21   | 0.05  | 0.02  | -1.23 | 4.31E-01 | -6.19 | 7.75E-06 | -1.40 | 6.47E-01 | M-1 |
| ENSMMUG00000002431 | RNF152   | Ring Finger Protein 152                                         | 1.47   | 1.33   | 0.46  | 0.05  | -0.82 | 6.37E-01 | -4.63 | 4.00E-04 | 0.78  | 8.14E-01 | M-1 |
| ENSMMUG00000004434 | ZCCHC2   | Zinc Finger CCHC-type Containing 2                              | 79.52  | 53.94  | 14.15 | 6.98  | -0.69 | 4.45E-01 | -2.49 | 6.61E-04 | -0.30 | 8.86E-01 | M-1 |
| ENSMMUG00000021184 | VPS4B    | Vacuolar Protein Sorting 4 Homolog B                            | 18.52  | 26.63  | 23.51 | 12.68 | 0.59  | 3.39E-01 | -1.19 | 2.62E-02 | 0.06  | 9.76E-01 | M-1 |
| ENSMMUG00000014182 | SERPINB5 | Serpin Family B Member 5                                        | 0.84   | 2.46   | 0.13  | 0.18  | 0.32  | 8.45E-01 | -2.41 | 4.36E-02 | -0.91 | 7.51E-01 | M-1 |
| ENSMMUG00000018275 | DOK6     | Docking Protein 6                                               | 3.82   | 1.17   | 0.58  | 0.05  | -2.34 | 7.77E-02 | -5.04 | 5.33E-05 | 1.54  | 5.32E-01 | M-1 |
| ENSMMUG00000020595 | NETO1    | Neuropilin And Tolloid Like 1                                   | 129.26 | 140.62 | 24.58 | 0.47  | -0.43 | 7.47E-01 | -5.78 | 8.84E-11 | -1.76 | 2.25E-01 | M-1 |
| ENSMMUG00000011329 | ZNF236   | Zinc Finger Protein 236                                         | 14.61  | 18.47  | 6.76  | 5.58  | 0.17  | 8.27E-01 | -2.19 | 3.11E-05 | 0.44  | 7.15E-01 | M-1 |
| ENSMMUG00000011333 | MBP      | Myelin Basic Protein                                            | 44.85  | 15.60  | 2.28  | 0.24  | -1.16 | 3.15E-01 | -3.98 | 3.76E-05 | -2.25 | 1.28E-01 | M-1 |
| ENSMMUG00000032486 | KCNQ2    | Potassium Voltage-gated Channel Modifier Subfamily G Member 2   | 0.73   | 0.51   | 0.12  | 0.02  | 0.36  | 8.75E-01 | -4.41 | 6.22E-03 | -1.27 | 7.42E-01 | M-1 |
| ENSMMUG00000039029 | PARD6G   | Par-6 Family Cell Polarity Regulator Gamma                      | 8.26   | 7.48   | 1.21  | 0.43  | -0.05 | 9.79E-01 | -3.64 | 9.15E-04 | 0.21  | 9.60E-01 | M-1 |
| ENSMMUG00000002847 | REXO1    | RNA Exonuclease 1 Homolog                                       | 29.58  | 12.65  | 3.63  | 4.18  | -0.91 | 4.10E-01 | -2.19 | 1.89E-02 | -0.63 | 7.68E-01 | M-1 |
| ENSMMUG00000006620 | CSNK1G2  | Casein Kinase 1 Gamma 2                                         | 28.98  | 15.63  | 5.04  | 5.64  | -0.31 | 8.01E-01 | -2.41 | 4.03E-03 | 0.10  | 9.74E-01 | M-1 |
| ENSMMUG00000006618 | BTBD2    | BTB Domain Containing 2                                         | 3.69   | 3.61   | 1.67  | 2.00  | -0.13 | 9.46E-01 | -2.94 | 1.34E-02 | 1.08  | 6.55E-01 | M-1 |
| ENSMMUG00000001190 | TMPPRSS9 | Transmembrane Protease, Serine 9                                | 2.29   | 1.57   | 0.13  | 0.21  | -1.85 | 2.11E-01 | -3.51 | 9.74E-03 | 2.57  | 2.00E-01 | M-1 |
| ENSMMUG00000002913 | TLE2     | Transducin Like Enhancer Of Split 2                             | 10.89  | 4.92   | 0.52  | 0.76  | -1.12 | 1.92E-01 | -4.29 | 4.58E-09 | 0.40  | 8.44E-01 | M-1 |
| ENSMMUG00000003439 | NFIC     | Nuclear Factor I C                                              | 3.96   | 7.81   | 0.46  | 0.60  | 0.33  | 8.50E-01 | -2.96 | 1.12E-02 | -0.01 | 9.98E-01 | M-1 |
| ENSMMUG00000008137 | PIP5K1C  | Phosphatidylinositol-4-phosphate 5-kinase Type 1 Gamma          | 5.22   | 3.73   | 1.77  | 1.87  | -0.49 | 6.56E-01 | -1.85 | 2.97E-02 | 0.04  | 9.92E-01 | M-1 |
| ENSMMUG00000047828 | RAX2     | Retina And Anterior Neural Fold Homeobox 2                      | 1.64   | 2.23   | 0.03  | 0.04  | -0.57 | 8.46E-01 | -6.50 | 1.84E-03 | 0.09  | 9.92E-01 | M-1 |
| ENSMMUG00000037697 |          |                                                                 | 5.36   | 4.84   | 0.29  | 0.21  | -1.06 | 7.11E-01 | -5.99 | 8.44E-03 | 1.67  | 7.51E-01 | M-1 |
| ENSMMUG00000022765 | DAPK3    | Death Associated Protein Kinase 3                               | 6.59   | 7.83   | 2.15  | 2.14  | -0.80 | 5.54E-01 | -2.66 | 1.61E-02 | -0.43 | 8.90E-01 | M-1 |
| ENSMMUG00000019954 |          |                                                                 | 8.85   | 21.32  | 4.49  | 0.51  | 1.96  | 5.59E-02 | -4.90 | 1.11E-07 | -2.41 | 6.96E-02 | M-1 |
| ENSMMUG00000016706 | CHAF1A   | Chromatin Assembly Factor 1 Subunit A                           | 108.87 | 55.65  | 17.12 | 9.48  | -0.98 | 7.77E-02 | -1.52 | 2.98E-03 | -0.70 | 4.36E-01 | M-1 |
| ENSMMUG00000012705 | UHRF1    | Ubiquitin Like With PHD And Ring Finger Domains 1               | 171.08 | 174.18 | 7.62  | 3.74  | -0.46 | 6.35E-01 | -5.04 | 3.08E-13 | -0.56 | 7.39E-01 | M-1 |
| ENSMMUG00000011967 | RFX2     | Regulatory Factor X2                                            | 1.25   | 3.45   | 0.18  | 0.12  | -0.15 | 9.43E-01 | -4.15 | 2.32E-03 | -0.91 | 7.80E-01 | M-1 |
| ENSMMUG00000005697 | MLLT1    | MLLT1, Super Elongation Complex Subunit                         | 12.68  | 11.59  | 2.95  | 3.51  | 0.06  | 9.63E-01 | -2.32 | 2.17E-03 | 0.74  | 6.34E-01 | M-1 |
| ENSMMUG00000005698 | ACER1    | Alkaline Ceramidase 1                                           | 0.73   | 9.31   | 0.11  | 0.25  | 2.05  | 2.21E-01 | -6.95 | 2.04E-06 | 3.73  | 6.96E-02 | M-1 |
| ENSMMUG00000028914 | CLPP     | Caseinolytic Mitochondrial Matrix Peptidase Proteolytic Subunit | 18.86  | 42.79  | 12.64 | 13.75 | 0.90  | 3.15E-01 | -1.98 | 1.09E-02 | 0.63  | 7.07E-01 | M-1 |

|                    |             |                                                    |        |        |       |       |       |          |       |          |       |          |     |
|--------------------|-------------|----------------------------------------------------|--------|--------|-------|-------|-------|----------|-------|----------|-------|----------|-----|
| ENSMMUG0000007904  | GTF2F1      | General Transcription Factor IIF Subunit 1         | 17.71  | 48.23  | 16.08 | 10.85 | 1.64  | 8.14E-02 | -2.27 | 1.01E-02 | -0.14 | 9.67E-01 | M-1 |
| ENSMMUG0000005597  |             |                                                    | 29.81  | 44.49  | 24.37 | 23.00 | 0.66  | 3.21E-01 | -1.23 | 3.63E-02 | 0.01  | 9.96E-01 | M-1 |
| ENSMMUG0000005600  | DENND1C     | DENN Domain Containing 1C                          | 70.45  | 129.01 | 8.17  | 1.74  | 0.48  | 6.97E-01 | -3.95 | 5.00E-06 | -2.24 | 6.91E-02 | M-1 |
| ENSMMUG00000019314 | VAV1        | Vav Guanine Nucleotide Exchange Factor 1           | 7.38   | 6.63   | 0.36  | 0.34  | -0.32 | 8.80E-01 | -4.80 | 5.23E-04 | 0.13  | 9.80E-01 | M-1 |
| ENSMMUG00000011389 | MCOLN1      | Mucolipin 1                                        | 13.17  | 8.89   | 2.55  | 1.90  | -0.73 | 4.00E-01 | -1.77 | 1.72E-02 | -0.17 | 9.46E-01 | M-1 |
| ENSMMUG00000014032 |             |                                                    | 76.51  | 103.05 | 15.34 | 0.68  | 0.36  | 7.95E-01 | -4.80 | 1.15E-07 | -1.74 | 2.37E-01 | M-1 |
| ENSMMUG0000006540  | SNAPC2      | Small Nuclear RNA Activating Complex Polypeptide 2 | 6.48   | 13.00  | 1.88  | 1.54  | 0.87  | 5.68E-01 | -3.02 | 1.35E-02 | 0.22  | 9.62E-01 | M-1 |
| ENSMMUG00000014604 | DNMT1       | DNA Methyltransferase 1                            | #####  | #####  | 66.57 | 7.85  | 0.01  | 9.92E-01 | -5.29 | 1.58E-14 | -1.55 | 1.54E-01 | M-1 |
| ENSMMUG00000014896 | ICAM1       | Intercellular Adhesion Molecule 1                  | 13.25  | 7.71   | 0.34  | 0.19  | -1.81 | 1.55E-01 | -5.89 | 1.13E-06 | 0.14  | 9.74E-01 | M-1 |
| ENSMMUG00000019718 | ICAM3       | Intercellular Adhesion Molecule 3                  | 1.14   | 3.08   | 0.40  | 0.27  | 0.52  | 8.13E-01 | -4.07 | 8.59E-03 | 0.87  | 8.20E-01 | M-1 |
| ENSMMUG00000011951 | KRI1        | KRI1 Homolog                                       | 3.09   | 17.04  | 8.65  | 5.40  | 2.10  | 5.12E-02 | -2.43 | 1.87E-02 | 0.01  | 9.99E-01 | M-1 |
| ENSMMUG00000018981 | C19H19orf38 | Chromosome 19 Open Reading Frame, Human C19orf38   | 7.04   | 5.41   | 0.14  | 0.09  | -1.90 | 2.22E-01 | -5.40 | 1.51E-04 | -1.32 | 6.80E-01 | M-1 |
| ENSMMUG00000009334 | DOCK6       | Dedicator Of Cytokinesis 6                         | 4.72   | 7.15   | 1.07  | 4.65  | 0.26  | 8.32E-01 | -3.01 | 2.50E-04 | 2.00  | 8.40E-02 | M-1 |
| ENSMMUG00000016505 | CCDC151     | Coiled-coil Domain Containing 151                  | 1.10   | 1.36   | 0.04  | 0.01  | -0.16 | 9.49E-01 | -6.38 | 1.78E-04 | -1.43 | 7.17E-01 | M-1 |
| ENSMMUG00000005860 |             |                                                    | 85.53  | 37.70  | 3.24  | 5.21  | -1.07 | 3.40E-01 | -3.81 | 6.29E-05 | 0.40  | 8.91E-01 | M-1 |
| ENSMMUG00000013569 |             |                                                    | 66.04  | 28.29  | 3.75  | 2.79  | -1.49 | 9.01E-02 | -3.52 | 8.38E-06 | 0.26  | 9.15E-01 | M-1 |
| ENSMMUG00000014351 | ZNF136      | Zinc Finger Protein 136                            | 31.62  | 16.64  | 4.76  | 4.05  | -0.94 | 2.17E-01 | -2.29 | 5.02E-04 | 0.10  | 9.68E-01 | M-1 |
| ENSMMUG00000005235 | LOC717463   | Zinc Finger Protein 442                            | 2.38   | 7.32   | 0.69  | 1.14  | 0.96  | 5.09E-01 | -3.00 | 1.17E-02 | 0.87  | 7.47E-01 | M-1 |
| ENSMMUG00000017645 | ZSWIM4      | Zinc Finger SWIM-type Containing 4                 | 9.45   | 5.20   | 0.13  | 0.13  | -0.56 | 6.86E-01 | -5.54 | 6.37E-08 | -0.39 | 9.04E-01 | M-1 |
| ENSMMUG00000008320 | CC2D1A      | Coiled-coil And C2 Domain Containing 1A            | 1.41   | 1.50   | 0.43  | 1.21  | 1.15  | 5.05E-01 | -3.31 | 2.05E-02 | 1.81  | 4.68E-01 | M-1 |
| ENSMMUG00000008326 | DCAF15      | DDB1 And CUL4 Associated Factor 15                 | 14.27  | 14.33  | 2.91  | 7.12  | -0.18 | 9.18E-01 | -2.38 | 4.04E-02 | 1.33  | 5.19E-01 | M-1 |
| ENSMMUG00000013538 | IL27RA      | Interleukin 27 Receptor Subunit Alpha              | 8.10   | 2.51   | 0.14  | 0.18  | -1.58 | 2.03E-01 | -5.54 | 4.42E-07 | 1.89  | 3.04E-01 | M-1 |
| ENSMMUG00000042544 |             |                                                    | 9.71   | 6.61   | 0.33  | 0.20  | -1.40 | 3.75E-01 | -3.96 | 4.13E-03 | -2.28 | 3.22E-01 | M-1 |
| ENSMMUG00000045865 | C19H19orf67 | Chromosome 19 Open Reading Frame, Human C19orf67   | 20.13  | 10.44  | 1.61  | 0.24  | -2.21 | 1.66E-01 | -4.32 | 3.42E-03 | -0.65 | 8.81E-01 | M-1 |
| ENSMMUG00000014135 | ASF1B       | Anti-silencing Function 1B Histone Chaperone       | 14.40  | 7.37   | 0.92  | 3.65  | -0.77 | 4.87E-01 | -3.96 | 5.76E-06 | 0.73  | 7.21E-01 | M-1 |
| ENSMMUG00000014137 | ADGRL1      | Adhesion G Protein-coupled Receptor L1             | 4.58   | 6.00   | 3.59  | 2.80  | 0.57  | 5.70E-01 | -1.70 | 3.61E-02 | 0.43  | 8.29E-01 | M-1 |
| ENSMMUG00000017906 | DNAJB1      | DnaJ Heat Shock Protein Family (Hsp40) Member B1   | 102.84 | 139.67 | 46.15 | 18.45 | 0.77  | 2.41E-01 | -2.71 | 6.05E-07 | -0.89 | 3.41E-01 | M-1 |
| ENSMMUG00000021382 | BRD4        | Bromodomain Containing 4                           | 42.66  | 77.86  | 31.08 | 29.07 | 0.73  | 1.95E-01 | -1.31 | 9.33E-03 | -0.11 | 9.52E-01 | M-1 |
| ENSMMUG00000014026 | AP1M1       | Adaptor Related Protein Complex 1 Mu 1 Subunit     | 7.49   | 5.49   | 9.30  | 0.50  | -0.51 | 7.60E-01 | -4.40 | 1.84E-04 | -0.44 | 9.00E-01 | M-1 |
| ENSMMUG00000028855 |             |                                                    | 37.78  | 9.81   | 3.64  | 0.82  | -2.21 | 1.00E-01 | -2.66 | 4.07E-02 | -2.85 | 1.04E-01 | M-1 |
| ENSMMUG00000016231 | DDA1        | DET1 And DDB1 Associated 1                         | 82.62  | 124.45 | 28.54 | 17.40 | 0.67  | 4.78E-01 | -2.60 | 4.69E-04 | -0.50 | 7.84E-01 | M-1 |
| ENSMMUG00000005829 | BST2        | Bone Marrow Stromal Cell Antigen 2                 | 0.43   | 1.49   | 0.82  | 0.06  | -0.06 | 9.86E-01 | -4.74 | 3.86E-02 | 3.74  | 2.90E-01 | M-1 |
| ENSMMUG00000022742 | MAP1S       | Microtubule Associated Protein 1S                  | 12.92  | 14.97  | 5.45  | 2.49  | -0.03 | 9.81E-01 | -1.83 | 2.28E-02 | -0.34 | 8.74E-01 | M-1 |
| ENSMMUG00000007401 | ARRDC2      | Arrestin Domain Containing 2                       | 1.53   | 4.23   | 1.04  | 0.12  | 1.57  | 2.96E-01 | -2.70 | 4.85E-02 | -2.38 | 2.57E-01 | M-1 |
| ENSMMUG00000039364 | LOC698090   | Zinc Finger Protein 681                            | 62.07  | 67.21  | 28.94 | 16.73 | -0.01 | 9.91E-01 | -1.74 | 4.01E-03 | 0.25  | 8.86E-01 | M-1 |
| ENSMMUG00000018351 | CEP89       | Centrosomal Protein 89                             | 11.84  | 19.32  | 4.73  | 5.21  | 1.03  | 2.89E-01 | -2.04 | 1.72E-02 | -0.40 | 8.54E-01 | M-1 |
| ENSMMUG00000006126 | LOC704229   | Aldose Reductase-like                              | 3.11   | 0.61   | 0.18  | 0.13  | -2.55 | 8.01E-02 | -3.14 | 3.99E-02 | -0.47 | 9.14E-01 | M-1 |
| ENSMMUG00000015744 | ZNF302      | Zinc Finger Protein 302                            | 7.95   | 9.98   | 2.06  | 1.41  | 0.43  | 7.09E-01 | -2.28 | 6.62E-03 | -0.51 | 8.03E-01 | M-1 |
| ENSMMUG00000006440 | ZNF599      | Zinc Finger Protein 599                            | 3.10   | 5.03   | 0.17  | 0.21  | 0.82  | 6.27E-01 | -5.84 | 3.98E-06 | 0.87  | 7.96E-01 | M-1 |
| ENSMMUG00000002381 | KMT2B       | Lysine Methyltransferase 2B                        | 16.23  | 15.05  | 4.47  | 4.35  | 0.00  | 9.99E-01 | -2.15 | 9.80E-04 | 0.42  | 7.96E-01 | M-1 |

|                     |           |                                                                  |       |        |       |       |       |          |        |          |       |          |     |
|---------------------|-----------|------------------------------------------------------------------|-------|--------|-------|-------|-------|----------|--------|----------|-------|----------|-----|
| ENSMMUG00000002386  | LIN37     | Lin-37 DREAM MuvB Core Complex Component                         | 9.66  | 14.05  | 3.73  | 3.69  | 0.50  | 7.03E-01 | -2.11  | 3.61E-02 | -0.68 | 7.65E-01 | M-1 |
| ENSMMUG00000002389  | HSPB6     | Heat Shock Protein Family B (small) Member 6                     | 1.01  | 0.91   | 0.03  | 0.04  | -1.66 | 4.18E-01 | -4.82  | 1.53E-02 | 0.51  | 9.38E-01 | M-1 |
| ENSMMUG000000019701 |           |                                                                  | 4.40  | 6.98   | 0.48  | 0.75  | -0.05 | 9.78E-01 | -4.59  | 1.30E-05 | 0.83  | 7.37E-01 | M-1 |
| ENSMMUG000000014214 | LOC713619 | Zinc Finger Protein 420                                          | 26.15 | 10.77  | 3.31  | 0.99  | -0.79 | 5.01E-01 | -2.54  | 7.38E-03 | -1.06 | 5.54E-01 | M-1 |
| ENSMMUG00000001930  | ZNF607    | Zinc Finger Protein 607                                          | 7.10  | 2.04   | 0.33  | 0.55  | -1.97 | 9.21E-02 | -2.93  | 7.74E-03 | -0.07 | 9.86E-01 | M-1 |
| ENSMMUG000000020468 |           |                                                                  | 2.11  | 7.18   | 2.21  | 4.27  | 0.97  | 4.63E-01 | -2.44  | 3.10E-02 | 2.25  | 1.56E-01 | M-1 |
| ENSMMUG00000002897  | RYR1      | Ryanodine Receptor 1                                             | 0.96  | 2.89   | 0.14  | 0.10  | 1.85  | 1.31E-01 | -4.98  | 3.29E-06 | -1.19 | 5.91E-01 | M-1 |
| ENSMMUG000000021630 | MAP4K1    | Mitogen-activated Protein Kinase Kinase Kinase 1                 | 0.64  | 1.64   | 0.93  | 0.34  | 2.07  | 2.55E-01 | -3.80  | 1.90E-02 | 1.20  | 7.39E-01 | M-1 |
| ENSMMUG00000006431  | CAPN12    | Calpain 12                                                       | 1.43  | 1.14   | 0.06  | 0.21  | 0.26  | 9.12E-01 | -5.64  | 1.81E-04 | 1.35  | 6.80E-01 | M-1 |
| ENSMMUG00000005552  | PAF1      | PAF1 Homolog, Paf1/RNA Polymerase II Complex Component           | 15.51 | 37.34  | 14.96 | 10.04 | 1.15  | 1.24E-01 | -1.41  | 4.65E-02 | -0.47 | 7.68E-01 | M-1 |
| ENSMMUG000000019372 | SUPT5H    | SPT5 Homolog, DSIF Elongation Factor Subunit                     | 12.36 | 35.40  | 10.19 | 6.98  | 1.19  | 5.91E-02 | -1.77  | 2.58E-03 | -0.70 | 5.23E-01 | M-1 |
| ENSMMUG000000019093 | DLL3      | Delta Like Canonical Notch Ligand 3                              | 1.39  | 0.79   | 0.38  | 0.03  | -0.95 | 6.92E-01 | -4.43  | 2.17E-02 | -0.27 | 9.69E-01 | M-1 |
| ENSMMUG000000020685 | SERTAD3   | SERTA Domain Containing 3                                        | 53.88 | 124.77 | 23.39 | 11.76 | 1.11  | 3.11E-01 | -2.50  | 8.15E-03 | -0.17 | 9.62E-01 | M-1 |
| ENSMMUG000000001196 | CYP2F1    | Cytochrome P450, Family 2, Subfamily F, Polypeptide 6            | 48.38 | 162.85 | 6.41  | 1.90  | 1.67  | 1.26E-01 | -5.60  | 2.18E-09 | -0.65 | 7.85E-01 | M-1 |
| ENSMMUG000000008143 | CCDC97    | Coiled-coil Domain Containing 97                                 | 19.18 | 28.80  | 6.01  | 8.46  | 1.03  | 3.57E-01 | -2.40  | 1.17E-02 | 0.45  | 8.53E-01 | M-1 |
| ENSMMUG000000013426 |           |                                                                  | 24.19 | 14.73  | 1.84  | 0.16  | -1.00 | 5.16E-01 | -4.50  | 2.63E-04 | -2.46 | 2.27E-01 | M-1 |
| ENSMMUG000000017427 | ATP1A3    | ATPase Na+/K+ Transporting Subunit Alpha 3                       | 1.33  | 2.16   | 0.42  | 0.21  | -0.85 | 5.40E-01 | -3.88  | 9.68E-04 | 0.14  | 9.74E-01 | M-1 |
| ENSMMUG000000013374 | ZNF574    | Zinc Finger Protein 574                                          | 23.50 | 43.08  | 15.78 | 5.11  | 1.00  | 1.29E-01 | -1.64  | 5.95E-03 | -1.30 | 1.28E-01 | M-1 |
| ENSMMUG000000021062 |           |                                                                  | 5.81  | 4.98   | 0.60  | 0.12  | -1.43 | 4.29E-01 | -4.19  | 7.04E-03 | -2.45 | 3.67E-01 | M-1 |
| ENSMMUG000000004467 | XRCC1     | X-ray Repair Cross Complementing 1                               | 43.97 | 33.92  | 8.92  | 9.15  | 0.13  | 9.05E-01 | -3.20  | 1.79E-06 | 1.08  | 3.49E-01 | M-1 |
| ENSMMUG000000012801 | ZNF235    | Zinc Finger Protein 235                                          | 18.15 | 7.52   | 2.05  | 0.67  | -0.96 | 3.78E-01 | -2.40  | 9.69E-03 | -1.68 | 2.36E-01 | M-1 |
| ENSMMUG000000014430 | FOSB      | FosB Proto-oncogene, AP-1 Transcription Factor Subunit           | 2.90  | 8.09   | 0.74  | 0.07  | -0.33 | 8.99E-01 | -5.87  | 1.06E-03 | -3.68 | 1.51E-01 | M-1 |
| ENSMMUG000000011716 | RTN2      | Reticulon 2                                                      | 0.71  | 2.55   | 0.51  | 0.36  | 1.26  | 2.41E-01 | -2.36  | 1.51E-02 | -1.10 | 5.43E-01 | M-1 |
| ENSMMUG000000021360 | FBXO46    | F-box Protein 46                                                 | 1.23  | 2.31   | 1.68  | 1.38  | 1.88  | 2.61E-01 | -3.29  | 3.01E-02 | 2.19  | 3.79E-01 | M-1 |
| ENSMMUG000000049025 | BHMG1     | Basic Helix-loop-helix And HMG-box Containing 1                  | 1.77  | 0.76   | 0.02  | 0.06  | -1.87 | 3.47E-01 | -4.20  | 2.48E-02 | 0.74  | 8.90E-01 | M-1 |
| ENSMMUG000000011330 | NPAS1     | Neuronal PAS Domain Protein 1                                    | 29.39 | 15.05  | 2.31  | 0.41  | -0.82 | 5.76E-01 | -4.92  | 1.22E-05 | -0.61 | 8.43E-01 | M-1 |
| ENSMMUG000000009275 | DHX34     | DEXH-box Helicase 34                                             | 5.26  | 3.12   | 0.68  | 0.64  | -1.46 | 1.93E-01 | -3.70  | 1.73E-04 | 0.26  | 9.39E-01 | M-1 |
| ENSMMUG000000014729 | ZNF541    | Zinc Finger Protein 541                                          | 4.76  | 2.65   | 0.12  | 0.57  | -1.47 | 2.73E-01 | -5.20  | 8.52E-06 | 2.10  | 2.67E-01 | M-1 |
| ENSMMUG000000019356 | BICRA     | BRD4 Interacting Chromatin Remodeling Complex Associated Protein | 4.66  | 3.18   | 0.48  | 0.93  | -1.06 | 3.57E-01 | -2.65  | 7.03E-03 | 0.57  | 8.13E-01 | M-1 |
| ENSMMUG000000040121 | EHD2      | EH Domain Containing 2                                           | 9.34  | 16.92  | 3.90  | 0.25  | -0.91 | 5.38E-01 | -2.52  | 3.85E-02 | -1.41 | 5.16E-01 | M-1 |
| ENSMMUG000000000047 | SULT2A1   | Sulfotransferase Family 2A Member 1                              | 3.45  | 1.28   | 0.06  | 0.08  | -1.82 | 1.82E-01 | -4.15  | 1.38E-03 | -1.40 | 5.94E-01 | M-1 |
| ENSMMUG000000013072 | KDEL1     | KDEL Endoplasmic Reticulum Protein Retention Receptor 1          | 7.94  | 9.34   | 3.24  | 7.11  | 0.07  | 9.52E-01 | -1.83  | 1.78E-02 | 1.04  | 4.34E-01 | M-1 |
| ENSMMUG000000005983 | GRIN2D    | Glutamate Ionotropic Receptor NMDA Type Subunit 2D               | 0.94  | 3.42   | 0.15  | 0.15  | 2.30  | 1.62E-01 | -4.80  | 1.15E-03 | -0.28 | 9.61E-01 | M-1 |
| ENSMMUG000000022155 | SULT2B1   | Sulfotransferase Family 2B Member 1                              | 0.93  | 0.39   | 0.92  | 0.02  | -2.68 | 4.07E-01 | -21.35 | 2.15E-16 | 2.37  | 7.01E-01 | M-1 |
| ENSMMUG000000019738 | LOC722582 | Galactoside 2-alpha-L-fucosyltransferase 2                       | 4.38  | 52.06  | 0.09  | 0.05  | 1.51  | 5.46E-01 | -10.13 | 2.93E-07 | 2.28  | 5.62E-01 | M-1 |
| ENSMMUG000000018415 | RASIP1    | Ras Interacting Protein 1                                        | 3.99  | 2.57   | 0.15  | 0.10  | -0.26 | 9.03E-01 | -4.97  | 2.37E-04 | -0.41 | 9.24E-01 | M-1 |

|                      |              |                                                               |        |        |       |       |       |          |       |          |       |          |     |
|----------------------|--------------|---------------------------------------------------------------|--------|--------|-------|-------|-------|----------|-------|----------|-------|----------|-----|
| ENSMMUG00000009223   | PPP1R15A     | Protein Phosphatase 1<br>Regulatory Subunit 15A               | 6.21   | 18.26  | 2.50  | 0.89  | 1.66  | 6.55E-02 | -3.02 | 2.37E-04 | -0.93 | 5.69E-01 | M-1 |
| ENSMMUG00000003909   | FTL          | Ferritin Light Chain                                          | 98.35  | 197.29 | 66.06 | 65.97 | 1.00  | 1.95E-01 | -1.95 | 4.12E-03 | -0.50 | 7.51E-01 | M-1 |
| ENSMMUG000000040800  | KCNA7        | Potassium Voltage-gated<br>Channel Subfamily A<br>Member 7    | 2.16   | 1.94   | 0.50  | 0.55  | -0.44 | 8.28E-01 | -3.41 | 1.74E-02 | -0.03 | 9.95E-01 | M-1 |
| ENSMMUG000000020175  | MED25        | Mediator Complex Subunit<br>25                                | 14.84  | 12.17  | 4.18  | 5.43  | -0.53 | 6.22E-01 | -1.78 | 3.55E-02 | 1.39  | 2.78E-01 | M-1 |
| ENSMMUG000000011618  | PTOV1        | Prostate Tumor<br>Overexpressed 1                             | 19.77  | 13.62  | 4.21  | 10.77 | 0.01  | 9.95E-01 | -1.98 | 2.55E-02 | 0.80  | 6.52E-01 | M-1 |
| ENSMMUG000000013599  | KLK6         | Kallikrein Related Peptidase<br>6                             | 67.47  | 95.84  | 4.20  | 0.72  | -0.13 | 9.41E-01 | -4.79 | 4.24E-06 | -1.27 | 5.36E-01 | M-1 |
| ENSMMUG000000015445  | KLK8         | Kallikrein Related Peptidase<br>8                             | 0.91   | 1.18   | 0.21  | 0.12  | 0.18  | 9.49E-01 | -5.04 | 6.90E-03 | 0.48  | 9.40E-01 | M-1 |
| ENSMMUG000000043368  |              |                                                               | 2.66   | 6.66   | 4.03  | 3.48  | 1.23  | 6.88E-02 | -1.46 | 2.53E-02 | 0.08  | 9.74E-01 | M-1 |
| ENSMMUG000000017044  | LOC106994839 | Zinc Finger Protein 600                                       | 6.01   | 8.43   | 1.75  | 2.50  | -0.01 | 9.92E-01 | -2.19 | 3.79E-04 | 0.65  | 6.07E-01 | M-1 |
| ENSMMUG000000015981  | ZNF677       | Zinc Finger Protein 677                                       | 1.53   | 4.76   | 0.98  | 1.27  | 1.50  | 8.85E-02 | -2.19 | 7.45E-03 | 0.80  | 6.32E-01 | M-1 |
| ENSMMUG000000043422  | LOC720438    | Zinc Finger Protein 765-like                                  | 13.36  | 8.52   | 4.80  | 3.48  | -0.79 | 1.41E-01 | -1.14 | 2.20E-02 | -0.08 | 9.64E-01 | M-1 |
| ENSMMUG000000007972  | PRKCG        | Protein Kinase C Gamma                                        | 1.75   | 5.61   | 0.13  | 0.08  | 1.50  | 2.88E-01 | -6.01 | 7.02E-07 | 0.01  | 9.99E-01 | M-1 |
| ENSMMUG000000007975  | CACNG7       | Calcium Voltage-gated<br>Channel Auxiliary Subunit<br>Gamma 7 | 13.34  | 56.56  | 9.39  | 0.23  | 0.99  | 5.31E-01 | -5.84 | 1.24E-06 | -1.50 | 5.24E-01 | M-1 |
| ENSMMUG0000000043110 | VSTM1        | V-set And Transmembrane<br>Domain Containing 1                | 3.20   | 8.26   | 0.47  | 0.41  | 0.78  | 6.91E-01 | -5.60 | 3.97E-04 | -0.96 | 8.10E-01 | M-1 |
| ENSMMUG000000006169  | TNNT1        | Troponin T1, Slow Skeletal<br>Type                            | 2.39   | 1.54   | 0.04  | 0.13  | -1.08 | 5.82E-01 | -6.61 | 8.78E-05 | 3.39  | 1.82E-01 | M-1 |
| ENSMMUG000000001262  | TNNI3        | Troponin I3, Cardiac Type                                     | 2.16   | 10.85  | 0.83  | 1.82  | 2.53  | 8.34E-02 | -3.30 | 1.77E-02 | 1.45  | 5.90E-01 | M-1 |
| ENSMMUG000000005014  |              |                                                               | 4.86   | 12.58  | 1.38  | 0.06  | 1.31  | 3.77E-01 | -5.08 | 2.53E-05 | -2.76 | 1.31E-01 | M-1 |
| ENSMMUG000000000775  | ZNF132       | Zinc Finger Protein 132                                       | 5.76   | 4.78   | 1.65  | 0.96  | -0.56 | 6.76E-01 | -2.23 | 3.33E-02 | -0.61 | 8.06E-01 | M-1 |
| ENSMMUG000000043446  |              |                                                               | 11.21  | 9.94   | 1.03  | 1.61  | -0.39 | 8.77E-01 | -4.98 | 4.44E-03 | 3.42  | 1.99E-01 | M-1 |
| ENSMMUG0000000020493 | ZNF256       | Zinc Finger Protein 256                                       | 40.11  | 28.68  | 8.06  | 6.12  | -0.48 | 5.45E-01 | -1.68 | 8.18E-03 | -0.17 | 9.32E-01 | M-1 |
| ENSMMUG000000043611  | ZNF418       | Zinc Finger Protein 418                                       | 1.98   | 11.23  | 2.20  | 2.84  | 1.36  | 3.61E-01 | -3.03 | 1.76E-02 | 2.76  | 1.20E-01 | M-1 |
| ENSMMUG000000017400  | LOC709220    | Zinc Finger Protein 587                                       | 14.29  | 16.49  | 5.81  | 6.21  | 0.01  | 9.92E-01 | -1.86 | 3.20E-02 | 0.97  | 5.38E-01 | M-1 |
| ENSMMUG000000005333  | ZNF211       | Zinc Finger Protein 211                                       | 10.45  | 8.37   | 2.85  | 0.72  | 0.07  | 9.59E-01 | -2.24 | 1.50E-02 | -1.61 | 2.54E-01 | M-1 |
| ENSMMUG000000014282  | ZNF17        | Zinc Finger Protein 17                                        | 10.65  | 5.64   | 1.39  | 0.68  | -0.90 | 3.59E-01 | -2.52 | 2.05E-03 | -1.52 | 2.28E-01 | M-1 |
| ENSMMUG000000019284  | ZNF548       | Zinc Finger Protein 548                                       | 5.88   | 7.91   | 2.94  | 1.42  | 0.66  | 2.96E-01 | -1.73 | 1.27E-03 | -1.32 | 7.60E-02 | M-1 |
| ENSMMUG000000017852  | PEG3         | Paternally Expressed 3                                        | 8.27   | 8.31   | 4.31  | 4.48  | 0.63  | 2.66E-01 | -1.46 | 2.91E-03 | 0.60  | 5.11E-01 | M-1 |
| ENSMMUG000000015530  | GALP         | Galanin Like Peptide                                          | 0.82   | 10.93  | 0.12  | 0.11  | 5.18  | 8.24E-02 | -6.44 | 2.90E-02 | -0.13 | 9.91E-01 | M-1 |
| ENSMMUG000000009935  | NLRP8        | NLR Family Pyrin Domain<br>Containing 8                       | 194.48 | 209.24 | 10.46 | 0.95  | -0.51 | 6.95E-01 | -5.31 | 3.24E-09 | -2.23 | 9.21E-02 | M-1 |
| ENSMMUG000000016749  | NLRP13       | NLR Family Pyrin Domain<br>Containing 13                      | 255.27 | 123.60 | 5.93  | 0.88  | -1.64 | 6.55E-02 | -4.88 | 4.68E-10 | -1.90 | 1.04E-01 | M-1 |
| ENSMMUG000000029506  | NLRP9        | NLR Family Pyrin Domain<br>Containing 9                       | 407.82 | 282.22 | 23.40 | 5.78  | -0.54 | 5.63E-01 | -4.99 | 3.08E-13 | -0.66 | 6.73E-01 | M-1 |
| ENSMMUG000000042225  |              |                                                               | 21.56  | 34.21  | 21.61 | 9.66  | 1.09  | 5.34E-02 | -1.48 | 5.70E-03 | -0.28 | 8.40E-01 | M-1 |
| ENSMMUG000000005404  | ZNF25        | Zinc Finger Protein 25                                        | 2.51   | 0.44   | 0.12  | 0.07  | -2.38 | 2.90E-01 | -5.35 | 1.36E-02 | 2.70  | 4.82E-01 | M-1 |
| ENSMMUG000000007588  | LOC709331    | Tubulin Beta-8 Chain-like                                     | 65.46  | 23.03  | 4.07  | 1.05  | -1.53 | 7.41E-02 | -3.66 | 2.22E-06 | -0.97 | 5.19E-01 | M-1 |
| ENSMMUG000000042684  |              |                                                               | 5.95   | 2.46   | 0.28  | 0.53  | -2.20 | 1.65E-01 | -4.26 | 6.88E-03 | 2.42  | 3.35E-01 | M-1 |
| ENSMMUG000000031199  |              |                                                               | 3.15   | 1.95   | 0.26  | 0.02  | -0.44 | 8.54E-01 | -4.84 | 5.64E-03 | -1.03 | 8.21E-01 | M-1 |
| ENSMMUG000000005565  | LOC706213    | Olfactory Receptor 2T2                                        | 5.87   | 1.44   | 0.29  | 0.09  | -2.17 | 2.69E-01 | -4.07 | 2.83E-02 | -1.75 | 6.50E-01 | M-1 |
| ENSMMUG000000046873  | LOC719465    | Translation Initiation Factor<br>IF-2-like                    | 1.46   | 2.14   | 0.19  | 0.21  | -0.15 | 9.49E-01 | -3.92 | 1.62E-02 | 1.51  | 6.47E-01 | M-1 |
| ENSMMUG000000039974  |              |                                                               | 4.97   | 7.56   | 1.31  | 0.39  | -0.79 | 6.29E-01 | -4.19 | 7.13E-04 | 0.72  | 8.19E-01 | M-1 |
| ENSMMUG000000044946  |              |                                                               | 10.50  | 7.86   | 2.88  | 0.70  | -0.67 | 5.46E-01 | -2.04 | 2.51E-02 | -1.19 | 4.50E-01 | M-1 |
| ENSMMUG000000039585  |              |                                                               | 27.83  | 32.23  | 14.45 | 1.13  | 0.03  | 9.85E-01 | -2.25 | 3.60E-02 | -2.19 | 1.47E-01 | M-1 |
| ENSMMUG000000039470  | MAMU-E       | Major Histocompatibility<br>Complex, Class I, E               | 1.01   | 6.38   | 2.02  | 5.79  | 1.80  | 1.66E-01 | -2.83 | 1.67E-02 | 2.96  | 5.49E-02 | M-1 |
| ENSMMUG000000047301  |              |                                                               | 6.46   | 17.89  | 12.68 | 1.03  | 0.86  | 4.39E-01 | -1.93 | 4.35E-02 | -2.17 | 8.71E-02 | M-1 |
| ENSMMUG000000037948  |              |                                                               | 0.73   | 0.84   | 0.45  | 0.15  | 1.03  | 5.37E-01 | -3.49 | 1.72E-02 | 0.60  | 8.84E-01 | M-1 |
| ENSMMUG000000041081  |              |                                                               | 12.85  | 22.24  | 5.32  | 7.05  | 2.25  | 9.05E-02 | -3.22 | 1.05E-02 | 0.32  | 9.38E-01 | M-1 |
| ENSMMUG000000040795  |              |                                                               | 1.41   | 5.81   | 0.41  | 0.24  | 1.81  | 1.68E-01 | -3.62 | 3.24E-03 | -1.51 | 5.31E-01 | M-1 |
| ENSMMUG000000047050  |              |                                                               | 327.33 | 115.85 | 19.29 | 3.41  | -1.45 | 1.76E-01 | -3.85 | 4.12E-05 | -1.47 | 3.72E-01 | M-1 |
| ENSMMUG000000047786  |              |                                                               | 2.40   | 12.39  | 0.72  | 0.91  | 1.17  | 5.71E-01 | -5.76 | 1.06E-03 | 2.85  | 2.94E-01 | M-1 |
| ENSMMUG000000045726  |              |                                                               | 162.92 | 131.42 | 47.40 | 33.39 | -0.28 | 7.69E-01 | -2.37 | 2.62E-04 | 0.46  | 7.69E-01 | M-1 |
| ENSMMUG0000000041710 |              |                                                               | 1.24   | 2.29   | 0.21  | 0.32  | 1.44  | 4.86E-01 | -4.25 | 1.74E-02 | 0.35  | 9.60E-01 | M-1 |

|                    |              |                                                                        |        |        |        |        |       |          |       |          |       |          |     |
|--------------------|--------------|------------------------------------------------------------------------|--------|--------|--------|--------|-------|----------|-------|----------|-------|----------|-----|
| ENSMMUG00000030930 |              |                                                                        | 29.48  | 15.38  | 0.68   | 0.17   | -1.40 | 2.46E-01 | -4.75 | 1.02E-05 | -1.67 | 4.22E-01 | M-1 |
| ENSMMUG00000039239 |              |                                                                        | 5.15   | 11.67  | 0.95   | 0.85   | -0.35 | 8.73E-01 | -3.25 | 2.77E-02 | 0.40  | 9.31E-01 | M-1 |
| ENSMMUG00000046519 |              |                                                                        | 4.82   | 1.04   | 0.37   | 0.03   | -2.70 | 2.14E-01 | -5.42 | 1.24E-02 | 1.27  | 8.15E-01 | M-1 |
| ENSMMUG00000007145 |              |                                                                        | 32.05  | 28.58  | 12.76  | 4.50   | 0.13  | 9.25E-01 | -2.50 | 4.70E-03 | -0.19 | 9.52E-01 | M-1 |
| ENSMMUG00000046966 |              |                                                                        | 17.89  | 16.68  | 0.30   | 0.32   | -0.59 | 7.71E-01 | -6.95 | 4.28E-06 | 0.30  | 9.59E-01 | M-1 |
| ENSMMUG00000043539 |              |                                                                        | 317.87 | 98.53  | 17.86  | 2.93   | -1.40 | 1.98E-01 | -3.85 | 5.89E-05 | -2.43 | 8.79E-02 | M-1 |
| ENSMMUG00000041341 |              |                                                                        | 230.87 | 157.19 | 14.33  | 4.60   | -1.08 | 2.83E-01 | -3.72 | 1.98E-05 | -0.49 | 8.37E-01 | M-1 |
| ENSMMUG00000047148 | LOC106995557 | Ubiquitin                                                              | 234.38 | 179.38 | 121.82 | 138.75 | 0.02  | 9.85E-01 | -1.33 | 3.62E-02 | 0.18  | 9.22E-01 | M-1 |
| ENSMMUG00000039084 |              |                                                                        | 67.73  | 66.66  | 33.39  | 33.06  | -0.09 | 9.29E-01 | -1.34 | 3.82E-02 | 0.62  | 6.25E-01 | M-1 |
| ENSMMUG00000012961 | MIB2         | Mindbomb E3 Ubiquitin Protein Ligase 2                                 | 0.93   | 0.39   | 0.42   | 0.16   | -3.96 | 6.95E-03 | 0.73  | 7.22E-01 | -2.47 | 3.22E-01 | M-2 |
| ENSMMUG00000012346 | RER1         | Retention In Endoplasmic Reticulum Sorting Receptor 1                  | 9.58   | 3.02   | 6.25   | 8.89   | -1.44 | 4.23E-02 | 1.03  | 1.60E-01 | -0.08 | 9.75E-01 | M-2 |
| ENSMMUG00000016837 | KCNAB2       | Potassium Voltage-gated Channel Subfamily A Regulatory Beta Subunit 2  | 2.99   | 0.53   | 1.67   | 0.10   | -3.43 | 2.71E-02 | 0.03  | 9.89E-01 | -3.07 | 1.61E-01 | M-2 |
| ENSMMUG00000032248 | MIIP         | Migration And Invasion Inhibitory Protein                              | 6.01   | 2.00   | 3.95   | 3.46   | -3.75 | 3.44E-04 | 1.27  | 3.08E-01 | 1.04  | 6.37E-01 | M-2 |
| ENSMMUG00000004466 | NIPAL3       | NIPA Like Domain Containing 3                                          | 8.41   | 0.71   | 0.54   | 2.29   | -3.25 | 2.96E-03 | -1.17 | 3.65E-01 | 2.30  | 1.47E-01 | M-2 |
| ENSMMUG00000032217 | TMEM50A      | Transmembrane Protein 50A                                              | 24.38  | 8.56   | 7.06   | 6.44   | -1.81 | 4.57E-04 | 0.23  | 7.54E-01 | -0.06 | 9.74E-01 | M-2 |
| ENSMMUG00000009452 | TRIM63       | Tripartite Motif Containing 63                                         | 19.78  | 0.96   | 0.50   | 2.62   | -4.92 | 5.80E-07 | -1.74 | 1.39E-01 | 2.49  | 8.90E-02 | M-2 |
| ENSMMUG00000041160 | ZDHC18       | Zinc Finger DHHC-type Containing 18                                    | 3.68   | 0.81   | 1.18   | 0.43   | -2.91 | 3.22E-02 | -0.37 | 8.45E-01 | -1.25 | 6.37E-01 | M-2 |
| ENSMMUG00000015115 | FAM46B       | Family With Sequence Similarity 46 Member B                            | 23.86  | 4.50   | 5.22   | 4.82   | -2.62 | 2.57E-02 | -0.05 | 9.79E-01 | 0.39  | 9.05E-01 | M-2 |
| ENSMMUG00000017301 | TMEM54       | Transmembrane Protein 54                                               | 1.06   | 0.11   | 1.32   | 4.31   | -3.89 | 9.88E-03 | 2.01  | 2.29E-01 | 3.21  | 1.21E-01 | M-2 |
| ENSMMUG00000006389 | ZSCAN20      | Zinc Finger And SCAN Domain Containing 20                              | 0.78   | 0.11   | 0.78   | 0.45   | -3.90 | 4.23E-02 | 3.18  | 1.02E-01 | 0.83  | 8.62E-01 | M-2 |
| ENSMMUG00000023634 | RRAGC        | Ras Related GTP Binding C                                              | 5.56   | 0.83   | 1.89   | 3.14   | -3.60 | 1.10E-05 | 0.88  | 3.86E-01 | 1.62  | 2.10E-01 | M-2 |
| ENSMMUG00000039765 | MYCBP        | MYC Binding Protein                                                    | 50.48  | 27.27  | 19.85  | 18.14  | -1.39 | 4.13E-02 | -0.28 | 7.54E-01 | 0.08  | 9.74E-01 | M-2 |
| ENSMMUG00000015155 | B4GALT2      | Beta-1,4-galactosyltransferase 2                                       | 1.82   | 0.53   | 0.71   | 0.73   | -3.25 | 2.25E-02 | 1.75  | 2.64E-01 | -0.27 | 9.58E-01 | M-2 |
| ENSMMUG00000044591 |              |                                                                        | 10.22  | 0.41   | 0.83   | 0.21   | -5.49 | 1.81E-09 | 0.57  | 6.69E-01 | -1.18 | 5.41E-01 | M-2 |
| ENSMMUG00000015078 | POMGNT1      | Protein O-linked Mannose N-acetylglucosaminyltransferase 1 (beta 1,2-) | 2.11   | 0.33   | 2.32   | 1.84   | -3.58 | 6.97E-03 | 1.71  | 2.52E-01 | -0.17 | 9.72E-01 | M-2 |
| ENSMMUG00000004952 | SCP2         | Sterol Carrier Protein 2                                               | 2.94   | 0.72   | 2.92   | 12.56  | -2.62 | 4.49E-02 | 1.76  | 2.03E-01 | 1.94  | 3.35E-01 | M-2 |
| ENSMMUG00000002339 | USP1         | Ubiquitin Specific Peptidase 1                                         | 60.18  | 23.01  | 21.57  | 19.45  | -1.16 | 3.23E-02 | -0.40 | 5.32E-01 | -0.21 | 8.87E-01 | M-2 |
| ENSMMUG00000018565 | RAVER2       | Ribonucleoprotein, PTB Binding 2                                       | 3.05   | 0.29   | 0.61   | 0.83   | -2.91 | 3.20E-02 | -0.36 | 8.52E-01 | 0.91  | 7.68E-01 | M-2 |
| ENSMMUG00000013333 | DIRAS3       | DIRAS Family GTPase 3                                                  | 12.43  | 1.77   | 0.89   | 0.18   | -3.61 | 1.22E-02 | 0.04  | 9.86E-01 | -2.64 | 2.46E-01 | M-2 |
| ENSMMUG00000019488 | TNNI3K       | TNNI3 Interacting Kinase                                               | 3.25   | 0.45   | 1.63   | 0.77   | -3.13 | 3.09E-03 | -0.53 | 7.19E-01 | 1.24  | 5.40E-01 | M-2 |
| ENSMMUG00000006583 |              |                                                                        | 438.25 | 29.94  | 39.07  | 41.94  | -3.90 | 3.84E-09 | 0.07  | 9.52E-01 | 0.76  | 5.85E-01 | M-2 |
| ENSMMUG00000013197 | CYR61        | Cysteine Rich Angiogenic Inducer 61                                    | 6.41   | 4.59   | 0.73   | 1.29   | -3.99 | 6.22E-03 | 0.96  | 6.02E-01 | 2.50  | 2.68E-01 | M-2 |
| ENSMMUG00000001380 | ODF2L        | Outer Dense Fiber Of Sperm Tails 2 Like                                | 3.19   | 1.05   | 1.12   | 4.34   | -1.71 | 2.63E-02 | 0.36  | 7.21E-01 | 1.67  | 1.08E-01 | M-2 |
| ENSMMUG00000046107 |              |                                                                        | 1.27   | 0.38   | 1.73   | 4.38   | -2.96 | 1.24E-02 | 2.06  | 9.53E-02 | 2.49  | 1.23E-01 | M-2 |
| ENSMMUG00000007180 | KIAA1107     | KIAA1107 Ortholog                                                      | 11.08  | 2.41   | 1.61   | 1.13   | -2.84 | 5.63E-03 | 0.69  | 5.94E-01 | -1.63 | 3.20E-01 | M-2 |
| ENSMMUG00000013857 | GCLM         | Glutamate-cysteine Ligase Modifier Subunit                             | 12.56  | 2.53   | 3.82   | 13.48  | -2.65 | 9.34E-03 | 1.23  | 2.85E-01 | 0.81  | 7.11E-01 | M-2 |
| ENSMMUG00000014013 | ABCD3        | ATP Binding Cassette Subfamily D Member 3                              | 21.37  | 7.38   | 6.24   | 18.21  | -1.79 | 1.34E-02 | 0.02  | 9.84E-01 | 0.96  | 4.34E-01 | M-2 |
| ENSMMUG00000042059 | S1PR1        | Sphingosine-1-phosphate Receptor 1                                     | 3.00   | 0.27   | 0.06   | 0.04   | -5.68 | 4.50E-03 | -2.07 | 3.96E-01 | -1.19 | 8.15E-01 | M-2 |
| ENSMMUG00000017421 | TSPAN2       | Tetraspanin 2                                                          | 2.74   | 0.02   | 0.05   | 0.00   | -8.23 | 1.92E-06 | 2.15  | 3.37E-01 | -2.86 | 3.76E-01 | M-2 |
| ENSMMUG00000010074 | CDC42SE1     | CDC42 Small Effector 1                                                 | 8.85   | 1.72   | 3.88   | 12.49  | -2.43 | 1.32E-02 | 1.20  | 2.68E-01 | 1.67  | 2.59E-01 | M-2 |
| ENSMMUG00000016955 | RIIAD1       | Regulatory Subunit Of Type II PKA R-subunit (RIIa) Domain Containing 1 | 5.31   | 0.16   | 0.02   | 0.04   | -5.57 | 3.79E-03 | -1.60 | 5.36E-01 | 0.85  | 8.89E-01 | M-2 |

|                     |          |                                                                        |        |       |       |       |       |          |       |          |       |          |     |
|---------------------|----------|------------------------------------------------------------------------|--------|-------|-------|-------|-------|----------|-------|----------|-------|----------|-----|
| ENSMMUG00000045342  |          |                                                                        | 80.45  | 29.41 | 48.23 | 36.29 | -1.74 | 1.88E-02 | 0.47  | 6.11E-01 | 0.30  | 8.81E-01 | M-2 |
| ENSMMUG00000006579  | PYGO2    | Pygopus Family PHD Finger 2                                            | 107.72 | 12.42 | 26.73 | 13.82 | -3.24 | 3.00E-05 | -0.43 | 6.96E-01 | -0.23 | 9.30E-01 | M-2 |
| ENSMMUG00000041008  |          |                                                                        | 385.46 | 28.61 | 43.57 | 46.32 | -3.57 | 1.10E-07 | 0.29  | 7.69E-01 | 0.72  | 6.15E-01 | M-2 |
| ENSMMUG00000042262  |          |                                                                        | 5.25   | 2.92  | 0.26  | 0.89  | -3.53 | 4.68E-02 | -1.32 | 5.49E-01 | -2.75 | 3.44E-01 | M-2 |
| ENSMMUG00000007896  | TAF1A    | TATA-box Binding Protein Associated Factor, RNA Polymerase I Subunit A | 39.91  | 7.61  | 3.56  | 2.75  | -1.96 | 1.39E-02 | -1.33 | 1.13E-01 | -0.69 | 6.77E-01 | M-2 |
| ENSMMUG00000017396  | BPNT1    | 3'(2'), 5'-biphosphate Nucleotidase 1                                  | 3.14   | 0.83  | 0.94  | 1.74  | -2.92 | 2.81E-03 | 0.95  | 4.19E-01 | 0.23  | 9.47E-01 | M-2 |
| ENSMMUG00000007806  | LYPLAL1  | Lysophospholipase Like 1                                               | 5.97   | 1.15  | 3.15  | 7.30  | -3.57 | 2.57E-03 | 1.96  | 1.29E-01 | 0.27  | 9.47E-01 | M-2 |
| ENSMMUG00000016099  | HHAT     | Hedgehog Acyltransferase                                               | 7.13   | 2.40  | 0.65  | 0.24  | -3.74 | 8.77E-04 | -0.71 | 6.36E-01 | -1.16 | 6.32E-01 | M-2 |
| ENSMMUG00000043588  |          |                                                                        | 15.97  | 3.45  | 1.92  | 1.83  | -2.43 | 3.40E-02 | -1.99 | 9.70E-02 | 0.53  | 8.62E-01 | M-2 |
| ENSMMUG00000011711  | CD55     | CD55 Molecule (Cromer Blood Group)                                     | 64.82  | 14.51 | 11.66 | 9.22  | -2.62 | 2.22E-03 | -0.25 | 8.43E-01 | -0.02 | 9.97E-01 | M-2 |
| ENSMMUG00000023569  | IL10     | Interleukin 10                                                         | 4.67   | 0.48  | 0.31  | 0.19  | -6.80 | 1.66E-03 | 2.18  | 4.14E-01 | -3.60 | 3.29E-01 | M-2 |
| ENSMMUG00000003673  | PM20D1   | Peptidase M20 Domain Containing 1                                      | 0.54   | 0.33  | 1.82  | 0.67  | -5.65 | 5.32E-03 | -0.65 | 8.36E-01 | 1.50  | 7.41E-01 | M-2 |
| ENSMMUG00000021426  | SLC41A1  | Solute Carrier Family 41 Member 1                                      | 14.12  | 7.06  | 5.68  | 2.99  | -1.69 | 4.07E-02 | -0.21 | 8.53E-01 | -0.59 | 7.39E-01 | M-2 |
| ENSMMUG00000004113  | MFSD4A   | Major Facilitator Superfamily Domain Containing 4A                     | 4.19   | 0.75  | 0.86  | 0.60  | -2.53 | 4.21E-02 | 0.30  | 8.62E-01 | -1.01 | 6.94E-01 | M-2 |
| ENSMMUG00000010480  | TMCC2    | Transmembrane And Coiled-coil Domain Family 2                          | 2.12   | 0.66  | 0.47  | 0.13  | -3.04 | 1.13E-02 | 0.61  | 7.01E-01 | -2.88 | 8.05E-02 | M-2 |
| ENSMMUG00000041850  | RABIF    | RAB Interacting Factor                                                 | 17.58  | 5.08  | 9.38  | 6.33  | -1.90 | 1.22E-02 | 0.79  | 3.65E-01 | -1.22 | 3.00E-01 | M-2 |
| ENSMMUG00000003998  | PPP1R12B | Protein Phosphatase 1 Regulatory Subunit 12B                           | 2.85   | 0.96  | 0.59  | 0.99  | -2.26 | 4.87E-02 | -0.60 | 6.80E-01 | 0.62  | 8.19E-01 | M-2 |
| ENSMMUG00000020772  | CSRP1    | Cysteine And Glycine Rich Protein 1                                    | 37.87  | 10.98 | 5.10  | 22.59 | -4.49 | 2.90E-05 | -1.15 | 3.86E-01 | 1.48  | 4.52E-01 | M-2 |
| ENSMMUG00000016409  | TSEN15   | TRNA Splicing Endonuclease Subunit 15                                  | 3.05   | 1.08  | 3.30  | 6.75  | -2.44 | 3.91E-02 | 2.09  | 7.91E-02 | 2.10  | 2.15E-01 | M-2 |
| ENSMMUG00000047833  | ARPC5    | Actin Related Protein 2/3 Complex Subunit 5                            | 29.08  | 5.41  | 12.66 | 53.05 | -2.98 | 2.32E-04 | 1.30  | 1.55E-01 | 1.84  | 1.16E-01 | M-2 |
| ENSMMUG00000005638  | RGS16    | Regulator Of G Protein Signaling 16                                    | 2.34   | 0.16  | 0.31  | 0.22  | -3.54 | 1.59E-06 | 0.36  | 7.44E-01 | 0.59  | 7.58E-01 | M-2 |
| ENSMMUG00000020023  |          |                                                                        | 5.79   | 1.26  | 0.42  | 0.19  | -3.59 | 5.81E-03 | -1.81 | 2.10E-01 | -0.51 | 8.92E-01 | M-2 |
| ENSMMUG00000020021  | STX6     | Syntaxin 6                                                             | 14.24  | 2.68  | 1.38  | 1.20  | -3.27 | 9.00E-05 | -0.86 | 4.06E-01 | 0.02  | 9.95E-01 | M-2 |
| ENSMMUG00000023203  | VAMP4    | Vesicle Associated Membrane Protein 4                                  | 3.37   | 0.98  | 4.74  | 0.79  | -2.97 | 4.41E-02 | 0.11  | 9.62E-01 | 0.77  | 8.27E-01 | M-2 |
| ENSMMUG00000013039  | SLC19A2  | Solute Carrier Family 19 Member 2                                      | 42.75  | 9.66  | 6.86  | 5.60  | -2.01 | 2.71E-02 | -1.19 | 2.23E-01 | 0.21  | 9.45E-01 | M-2 |
| ENSMMUG000000038144 | CREG1    | Cellular Repressor Of E1A Stimulated Genes 1                           | 75.81  | 23.56 | 13.73 | 7.78  | -1.81 | 2.44E-02 | -1.15 | 1.82E-01 | -0.09 | 9.74E-01 | M-2 |
| ENSMMUG00000013119  | DISC1    | Disrupted In Schizophrenia 1                                           | 2.52   | 0.58  | 0.30  | 0.20  | -2.58 | 4.45E-02 | -1.11 | 4.60E-01 | -1.06 | 6.95E-01 | M-2 |
| ENSMMUG00000007141  | ARID4B   | AT-rich Interaction Domain 4B                                          | 15.29  | 7.91  | 6.73  | 5.36  | -1.02 | 4.61E-02 | -0.31 | 6.20E-01 | -0.39 | 7.14E-01 | M-2 |
| ENSMMUG00000014263  | GPR137B  | G Protein-coupled Receptor 137B                                        | 8.68   | 0.96  | 1.64  | 0.87  | -3.35 | 3.50E-02 | -2.76 | 9.91E-02 | 1.06  | 7.72E-01 | M-2 |
| ENSMMUG00000021442  | CHRM3    | Cholinergic Receptor Muscarinic 3                                      | 1.88   | 1.11  | 0.15  | 0.17  | -4.97 | 8.65E-04 | -2.08 | 2.23E-01 | 3.52  | 1.04E-01 | M-2 |
| ENSMMUG00000002862  | ADGRG7   | Adhesion G Protein-coupled Receptor G7                                 | 6.08   | 1.02  | 0.15  | 0.07  | -3.16 | 2.21E-02 | -1.55 | 3.44E-01 | -2.88 | 2.23E-01 | M-2 |
| ENSMMUG00000014236  | SLC35A5  | Solute Carrier Family 35 Member A5                                     | 21.89  | 8.82  | 16.36 | 12.85 | -1.47 | 2.33E-02 | 1.00  | 1.41E-01 | 0.15  | 9.47E-01 | M-2 |
| ENSMMUG00000012010  | TMEM39A  | Transmembrane Protein 39A                                              | 77.69  | 25.39 | 31.70 | 16.32 | -1.73 | 5.98E-03 | 0.20  | 8.23E-01 | 0.04  | 9.86E-01 | M-2 |
| ENSMMUG00000001976  | NR1I2    | Nuclear Receptor Subfamily 1 Group I Member 2                          | 1.43   | 0.02  | 0.03  | 0.38  | -6.86 | 1.53E-04 | 0.28  | 9.30E-01 | 3.96  | 1.61E-01 | M-2 |
| ENSMMUG00000022572  | HSPBAP1  | HSPB1 Associated Protein 1                                             | 6.31   | 5.96  | 1.69  | 2.04  | -2.67 | 4.10E-02 | -1.45 | 3.15E-01 | 2.77  | 1.20E-01 | M-2 |
| ENSMMUG00000011106  | SNX4     | Sorting Nexin 4                                                        | 28.60  | 5.65  | 10.32 | 10.05 | -2.92 | 1.81E-05 | 1.34  | 7.62E-02 | 0.41  | 8.12E-01 | M-2 |
| ENSMMUG00000000756  |          |                                                                        | 5.66   | 0.25  | 1.37  | 1.41  | -5.62 | 4.16E-04 | 1.44  | 4.74E-01 | 0.37  | 9.47E-01 | M-2 |

|                     |           |                                                               |        |        |       |       |       |          |       |          |       |          |     |
|---------------------|-----------|---------------------------------------------------------------|--------|--------|-------|-------|-------|----------|-------|----------|-------|----------|-----|
| ENSMMUG00000018663  | EEFSEC    | Eukaryotic Elongation Factor, Selenocysteine-tRNA Specific    | 3.07   | 0.65   | 0.64  | 1.50  | -2.39 | 1.86E-02 | -0.30 | 8.38E-01 | 1.26  | 4.78E-01 | M-2 |
| ENSMMUG00000013167  | HMCES     | 5-hydroxymethylcytosine (hmC) Binding, ES Cell-specific       | 18.53  | 2.82   | 3.40  | 3.45  | -3.11 | 2.15E-05 | 0.74  | 4.19E-01 | -0.67 | 6.81E-01 | M-2 |
| ENSMMUG00000001369  | HDAC11    | Histone Deacetylase 11                                        | 1.18   | 0.03   | 0.12  | 0.03  | -5.68 | 6.11E-04 | 2.27  | 2.58E-01 | -3.85 | 1.26E-01 | M-2 |
| ENSMMUG00000021804  | ATG7      | Autophagy Related 7                                           | 33.55  | 7.55   | 8.82  | 3.22  | -2.08 | 4.21E-02 | -1.77 | 8.70E-02 | 0.28  | 9.24E-01 | M-2 |
| ENSMMUG00000010350  | CIDEC     | Cell Death Inducing DFFA Like Effector C                      | 7.42   | 0.37   | 0.12  | 0.26  | -4.13 | 7.84E-03 | -3.34 | 6.66E-02 | 0.12  | 9.86E-01 | M-2 |
| ENSMMUG00000006114  | TADA3     | Transcriptional Adaptor 3                                     | 4.46   | 1.76   | 4.58  | 4.83  | -3.53 | 1.51E-03 | 1.62  | 1.99E-01 | -0.64 | 8.17E-01 | M-2 |
| ENSMMUG00000007808  | LOC703936 | Myotubularin-related Protein 14                               | 90.00  | 40.93  | 69.63 | 42.46 | -1.60 | 1.41E-02 | 0.84  | 2.40E-01 | -1.25 | 1.83E-01 | M-2 |
| ENSMMUG00000001849  | IL5RA     | Interleukin 5 Receptor Subunit Alpha                          | 2.51   | 1.10   | 0.21  | 0.07  | -2.81 | 1.66E-02 | -2.18 | 7.66E-02 | -1.87 | 3.23E-01 | M-2 |
| ENSMMUG000000040565 | GPR27     | G Protein-coupled Receptor 27                                 | 0.44   | 0.05   | 0.77  | 0.50  | -5.32 | 1.69E-02 | 3.35  | 1.65E-01 | 4.12  | 2.23E-01 | M-2 |
| ENSMMUG00000007780  | EIF4E3    | Eukaryotic Translation Initiation Factor 4E Family Member 3   | 20.49  | 2.34   | 0.89  | 7.63  | -3.31 | 3.68E-02 | -1.34 | 4.83E-01 | 3.07  | 1.92E-01 | M-2 |
| ENSMMUG00000008620  | UBA3      | Ubiquitin Like Modifier Activating Enzyme 3                   | 19.93  | 8.18   | 17.91 | 18.42 | -1.26 | 2.77E-02 | 0.61  | 3.45E-01 | 1.07  | 1.90E-01 | M-2 |
| ENSMMUG00000001531  | LRIG1     | Leucine Rich Repeats And Immunoglobulin Like Domains 1        | 11.93  | 4.55   | 2.66  | 4.16  | -1.72 | 3.69E-02 | -1.09 | 2.14E-01 | -0.06 | 9.86E-01 | M-2 |
| ENSMMUG00000001513  | PRICKLE2  | Prickle Planar Cell Polarity Protein 2                        | 2.34   | 0.56   | 1.30  | 0.08  | -2.66 | 1.40E-02 | -1.85 | 1.21E-01 | -1.52 | 4.52E-01 | M-2 |
| ENSMMUG000000038511 | C2H3orf14 | Chromosome 2 Open Reading Frame, Human C3orf14                | 2.27   | 0.26   | 0.64  | 0.70  | -4.33 | 3.33E-04 | 2.37  | 6.93E-02 | 1.07  | 6.85E-01 | M-2 |
| ENSMMUG000000012487 | PTPRG     | Protein Tyrosine Phosphatase, Receptor Type G                 | 7.31   | 3.24   | 0.75  | 0.91  | -2.14 | 2.91E-02 | -1.74 | 8.32E-02 | -0.31 | 9.10E-01 | M-2 |
| ENSMMUG000000047365 | CACNA2D3  | Calcium Voltage-gated Channel Auxiliary Subunit Alpha2delta 3 | 1.06   | 0.26   | 0.27  | 0.08  | -2.95 | 1.49E-02 | -0.07 | 9.70E-01 | -1.86 | 3.51E-01 | M-2 |
| ENSMMUG000000017360 | NT5DC2    | 5'-nucleotidase Domain Containing 2                           | 1.83   | 0.18   | 0.17  | 0.89  | -5.09 | 8.90E-03 | -0.43 | 8.85E-01 | 0.92  | 8.58E-01 | M-2 |
| ENSMMUG000000044500 | HYAL3     | Hyaluronoglucosaminidase 3                                    | 1.38   | 0.46   | 0.03  | 0.10  | -3.58 | 3.27E-02 | -2.42 | 2.10E-01 | -0.59 | 9.09E-01 | M-2 |
| ENSMMUG000000016476 |           |                                                               | 6.81   | 2.32   | 1.60  | 1.58  | -2.49 | 3.64E-02 | -0.73 | 6.25E-01 | 0.00  | 9.99E-01 | M-2 |
| ENSMMUG000000018020 | LARS2     | Leucyl-tRNA Synthetase 2, Mitochondrial                       | 9.44   | 3.75   | 4.07  | 4.89  | -1.76 | 2.97E-02 | 0.36  | 7.34E-01 | -0.75 | 6.35E-01 | M-2 |
| ENSMMUG000000019130 | EXOSC7    | Exosome Component 7                                           | 25.45  | 9.22   | 16.86 | 14.19 | -1.68 | 2.28E-02 | 1.04  | 1.90E-01 | 0.39  | 8.26E-01 | M-2 |
| ENSMMUG00000001031  | ABHD5     | Abhydrolase Domain Containing 5                               | 44.56  | 10.59  | 8.78  | 16.56 | -2.30 | 3.11E-03 | -0.62 | 5.21E-01 | 1.91  | 6.89E-02 | M-2 |
| ENSMMUG000000038332 |           |                                                               | 1.70   | 0.08   | 0.22  | 0.61  | -5.53 | 2.23E-04 | 2.39  | 1.90E-01 | 0.71  | 8.60E-01 | M-2 |
| ENSMMUG000000021927 |           |                                                               | 4.80   | 0.31   | 0.07  | 0.15  | -5.04 | 8.99E-04 | -1.93 | 2.90E-01 | 0.31  | 9.58E-01 | M-2 |
| ENSMMUG000000013661 | PARL      | Presenilin Associated Rhomboid Like                           | 61.11  | 21.54  | 16.18 | 13.40 | -1.27 | 2.97E-02 | -0.59 | 3.76E-01 | 0.24  | 8.73E-01 | M-2 |
| ENSMMUG000000004189 | FNDC3B    | Fibronectin Type III Domain Containing 3B                     | 13.28  | 4.09   | 4.87  | 4.27  | -1.51 | 1.68E-03 | 0.25  | 7.02E-01 | -0.26 | 8.32E-01 | M-2 |
| ENSMMUG000000044992 |           |                                                               | 1.55   | 0.11   | 0.03  | 0.10  | -4.21 | 3.40E-02 | -1.48 | 5.59E-01 | 2.64  | 4.73E-01 | M-2 |
| ENSMMUG000000041656 |           |                                                               | 3.46   | 0.64   | 1.03  | 1.28  | -3.39 | 1.02E-02 | 1.31  | 4.08E-01 | -0.07 | 9.88E-01 | M-2 |
| ENSMMUG000000022153 | SLC25A36  | Solute Carrier Family 25 Member 36                            | 225.28 | 121.09 | 61.51 | 53.88 | -1.20 | 3.33E-02 | -1.04 | 6.77E-02 | -0.07 | 9.73E-01 | M-2 |
| ENSMMUG000000007760 | CEP70     | Centrosomal Protein 70                                        | 9.83   | 4.50   | 2.83  | 2.20  | -1.44 | 2.96E-02 | -1.20 | 7.49E-02 | 0.78  | 5.08E-01 | M-2 |
| ENSMMUG000000047344 |           |                                                               | 8.57   | 1.52   | 4.24  | 3.79  | -3.78 | 6.97E-03 | 1.25  | 4.55E-01 | -0.03 | 9.97E-01 | M-2 |
| ENSMMUG000000019360 | SLC35G2   | Solute Carrier Family 35 Member G2                            | 3.61   | 0.31   | 0.34  | 1.66  | -3.63 | 2.76E-03 | -0.49 | 7.79E-01 | 2.22  | 2.59E-01 | M-2 |
| ENSMMUG000000000526 | ACKR4     | Atypical Chemokine Receptor 4                                 | 2.89   | 0.39   | 0.33  | 0.72  | -4.05 | 1.79E-03 | 0.09  | 9.67E-01 | 0.83  | 7.92E-01 | M-2 |
| ENSMMUG000000016005 | DNAJC13   | DnaJ Heat Shock Protein Family (Hsp40) Member C13             | 57.91  | 21.39  | 14.70 | 15.34 | -1.76 | 1.35E-04 | -0.82 | 1.08E-01 | 0.77  | 3.19E-01 | M-2 |

|                    |              |                                                      |       |       |       |       |       |          |       |          |       |          |     |
|--------------------|--------------|------------------------------------------------------|-------|-------|-------|-------|-------|----------|-------|----------|-------|----------|-----|
| ENSMMUG00000005137 | ATP2C1       | ATPase Secretory Pathway Ca2+ Transporting 1         | 16.02 | 5.28  | 7.19  | 8.32  | -1.63 | 2.49E-02 | 0.03  | 9.81E-01 | 1.38  | 1.83E-01 | M-2 |
| ENSMMUG00000006658 | CAPN7        | Calpain 7                                            | 6.55  | 2.48  | 1.86  | 4.40  | -2.13 | 2.17E-02 | -0.42 | 7.35E-01 | 1.11  | 4.98E-01 | M-2 |
| ENSMMUG00000022519 | HACL1        | 2-hydroxyacyl-CoA Lyase 1                            | 6.80  | 1.24  | 2.75  | 3.51  | -2.74 | 9.87E-03 | 1.01  | 4.14E-01 | 0.24  | 9.48E-01 | M-2 |
| ENSMMUG00000022694 | RFTN1        | Raftlin, Lipid Raft Linker 1                         | 15.27 | 5.31  | 0.48  | 0.29  | -3.48 | 7.21E-03 | -1.74 | 2.40E-01 | -1.93 | 3.97E-01 | M-2 |
| ENSMMUG00000006352 | NKIRAS1      | NFKB Inhibitor Interacting Ras Like 1                | 13.77 | 2.24  | 1.56  | 0.95  | -2.74 | 2.69E-02 | -0.20 | 9.14E-01 | -1.12 | 6.68E-01 | M-2 |
| ENSMMUG00000000067 | THRB         | Thyroid Hormone Receptor Beta                        | 1.64  | 0.18  | 0.18  | 0.04  | -3.30 | 3.86E-02 | -2.47 | 1.70E-01 | 1.08  | 7.91E-01 | M-2 |
| ENSMMUG00000000055 | CMC1         | C-X9-C Motif Containing 1                            | 22.20 | 4.25  | 15.62 | 21.89 | -2.50 | 2.69E-02 | 1.95  | 9.27E-02 | -0.05 | 9.91E-01 | M-2 |
| ENSMMUG00000031439 | FBXL2        | F-box And Leucine Rich Repeat Protein 2              | 10.92 | 2.87  | 0.63  | 0.74  | -2.35 | 1.72E-02 | -1.91 | 6.18E-02 | 0.51  | 8.40E-01 | M-2 |
| ENSMMUG00000020109 | GLB1         | Galactosidase Beta 1                                 | 11.80 | 3.20  | 6.79  | 14.35 | -2.32 | 9.23E-03 | 1.51  | 1.09E-01 | 0.20  | 9.48E-01 | M-2 |
| ENSMMUG00000004034 | WDR53        | WD Repeat Domain 53                                  | 7.56  | 0.57  | 0.49  | 1.08  | -3.26 | 4.43E-05 | -0.21 | 8.66E-01 | -0.06 | 9.84E-01 | M-2 |
| ENSMMUG00000002021 | BDH1         | 3-hydroxybutyrate Dehydrogenase 1                    | 2.59  | 0.20  | 0.49  | 1.77  | -4.39 | 4.63E-03 | 0.40  | 8.60E-01 | 3.01  | 1.90E-01 | M-2 |
| ENSMMUG00000032295 | ZNF595       | Zinc Finger Protein 595                              | 66.67 | 27.55 | 24.62 | 12.56 | -1.43 | 3.83E-03 | -0.12 | 8.72E-01 | -0.71 | 4.02E-01 | M-2 |
| ENSMMUG00000012625 |              |                                                      | 26.86 | 8.03  | 6.50  | 8.53  | -2.44 | 1.65E-02 | 0.64  | 6.18E-01 | -0.09 | 9.81E-01 | M-2 |
| ENSMMUG00000008363 | FAM53A       | Family With Sequence Similarity 53 Member A          | 6.26  | 0.96  | 0.40  | 0.42  | -3.21 | 1.45E-02 | -2.17 | 1.24E-01 | 2.46  | 2.17E-01 | M-2 |
| ENSMMUG00000048558 |              |                                                      | 4.89  | 0.84  | 1.14  | 1.16  | -3.43 | 3.27E-02 | 0.00  | 1.00E+00 | -1.85 | 5.29E-01 | M-2 |
| ENSMMUG00000014335 | SH3BP2       | SH3 Domain Binding Protein 2                         | 1.88  | 0.56  | 0.73  | 1.07  | -3.71 | 1.72E-03 | 2.21  | 8.19E-02 | -2.25 | 2.12E-01 | M-2 |
| ENSMMUG00000023242 |              |                                                      | 4.66  | 2.30  | 5.98  | 7.74  | -3.31 | 1.11E-02 | 2.32  | 8.88E-02 | 2.76  | 1.35E-01 | M-2 |
| ENSMMUG00000016922 | STK32B       | Serine/threonine Kinase 32B                          | 3.29  | 1.63  | 0.18  | 0.02  | -4.30 | 1.20E-02 | -2.48 | 2.24E-01 | -2.69 | 4.12E-01 | M-2 |
| ENSMMUG00000020860 | EVC2         | EvC Ciliary Complex Subunit 2                        | 1.71  | 0.91  | 0.21  | 0.17  | -3.32 | 3.18E-02 | -1.88 | 2.88E-01 | -2.49 | 3.09E-01 | M-2 |
| ENSMMUG00000017002 | TADA2B       | Transcriptional Adaptor 2B                           | 6.59  | 1.62  | 3.48  | 2.90  | -2.29 | 5.37E-03 | 0.76  | 4.36E-01 | -0.44 | 8.29E-01 | M-2 |
| ENSMMUG00000001747 | TAPT1        | Transmembrane Anterior Posterior Transformation 1    | 14.05 | 2.96  | 5.61  | 3.55  | -2.20 | 1.93E-02 | 0.32  | 8.06E-01 | -0.09 | 9.80E-01 | M-2 |
| ENSMMUG00000018070 | NCAPG        | Non-SMC Condensin I Complex Subunit G                | 48.34 | 23.94 | 19.22 | 22.92 | -1.02 | 5.83E-03 | -0.45 | 2.88E-01 | 0.35  | 6.42E-01 | M-2 |
| ENSMMUG00000006680 |              |                                                      | 2.43  | 2.46  | 5.68  | 5.32  | -2.82 | 4.90E-02 | 1.93  | 1.98E-01 | 2.88  | 1.36E-01 | M-2 |
| ENSMMUG00000009439 | STIM2        | Stromal Interaction Molecule 2                       | 3.55  | 1.31  | 1.94  | 0.58  | -2.46 | 2.91E-02 | 0.83  | 5.39E-01 | -0.79 | 7.51E-01 | M-2 |
| ENSMMUG00000002755 | KLHL5        | Kelch Like Family Member 5                           | 0.54  | 0.10  | 0.35  | 1.34  | -7.10 | 1.13E-05 | 3.18  | 8.30E-02 | 1.02  | 8.03E-01 | M-2 |
| ENSMMUG00000009273 | GNPDA2       | Glucosamine-6-phosphate Deaminase 2                  | 80.27 | 6.90  | 9.00  | 5.86  | -3.41 | 2.02E-05 | 0.02  | 9.87E-01 | -0.22 | 9.38E-01 | M-2 |
| ENSMMUG00000021780 |              |                                                      | 23.50 | 4.77  | 5.55  | 5.07  | -2.53 | 8.77E-04 | 0.37  | 7.29E-01 | -0.02 | 9.94E-01 | M-2 |
| ENSMMUG00000006703 |              |                                                      | 1.43  | 1.59  | 0.39  | 0.07  | -4.67 | 6.55E-03 | 0.31  | 9.06E-01 | -1.93 | 5.90E-01 | M-2 |
| ENSMMUG00000006705 | FRYL         | FRY Like Transcription Coactivator                   | 8.98  | 2.84  | 3.91  | 3.17  | -2.40 | 1.02E-03 | 1.24  | 1.19E-01 | -0.47 | 7.92E-01 | M-2 |
| ENSMMUG00000014714 | CWH43        | Cell Wall Biogenesis 43 C-terminal Homolog           | 2.33  | 0.10  | 0.09  | 0.01  | -4.72 | 4.87E-04 | -0.94 | 6.17E-01 | -1.22 | 7.26E-01 | M-2 |
| ENSMMUG00000021162 | CDS1         | CDP-diacylglycerol Synthase 1                        | 26.61 | 2.68  | 4.27  | 2.83  | -4.29 | 1.83E-06 | 1.64  | 1.08E-01 | -0.82 | 6.84E-01 | M-2 |
| ENSMMUG00000008510 | THAP9        | THAP Domain Containing 9                             | 8.94  | 2.88  | 4.98  | 6.39  | -1.93 | 2.98E-02 | 1.31  | 1.62E-01 | -0.78 | 6.55E-01 | M-2 |
| ENSMMUG00000042925 | LOC100429863 | Uncharacterized Protein C4orf22                      | 18.13 | 2.72  | 0.81  | 0.25  | -3.46 | 1.56E-02 | -2.12 | 1.96E-01 | -1.61 | 5.94E-01 | M-2 |
| ENSMMUG00000021835 | USO1         | USO1 Vesicle Transport Factor                        | 40.75 | 12.28 | 24.40 | 48.90 | -2.48 | 1.60E-04 | 1.29  | 7.11E-02 | 0.29  | 8.78E-01 | M-2 |
| ENSMMUG00000000790 |              |                                                      | 27.73 | 14.89 | 11.04 | 17.86 | -1.46 | 3.15E-02 | 0.01  | 9.92E-01 | 0.11  | 9.64E-01 | M-2 |
| ENSMMUG00000019047 | SPARCL1      | SPARC Like 1                                         | 12.73 | 0.10  | 0.46  | 0.44  | -6.72 | 2.23E-10 | 2.22  | 6.96E-02 | 0.90  | 7.26E-01 | M-2 |
| ENSMMUG00000040764 | LOC100424103 | Alcohol Dehydrogenase 1A-like                        | 7.07  | 0.68  | 0.33  | 0.04  | -4.51 | 1.07E-04 | -0.27 | 8.87E-01 | -3.27 | 8.25E-02 | M-2 |
| ENSMMUG00000047850 | ADH1B        | Alcohol Dehydrogenase 1B (class I), Beta Polypeptide | 1.25  | 0.22  | 0.08  | 0.02  | -4.18 | 3.95E-03 | -1.73 | 3.16E-01 | -1.42 | 6.48E-01 | M-2 |
| ENSMMUG00000019089 | CENPE        | Centromere Protein E                                 | 79.40 | 38.31 | 26.60 | 25.97 | -1.40 | 2.87E-03 | -0.08 | 9.14E-01 | -0.54 | 5.33E-01 | M-2 |
| ENSMMUG00000040787 |              |                                                      | 2.88  | 0.02  | 0.17  | 0.00  | -9.13 | 6.97E-03 | 4.23  | 2.75E-01 | -2.28 | 7.77E-01 | M-2 |
| ENSMMUG00000008177 | PLA2G12A     | Phospholipase A2 Group XIIA                          | 15.37 | 0.84  | 2.63  | 6.47  | -5.08 | 4.48E-06 | 2.25  | 6.97E-02 | 1.13  | 6.37E-01 | M-2 |
| ENSMMUG00000047534 | ELOVL6       | ELOVL Fatty Acid Elongase 6                          | 22.27 | 4.27  | 6.71  | 12.82 | -3.15 | 9.15E-03 | 0.25  | 8.89E-01 | 2.08  | 2.60E-01 | M-2 |



|                     |              |                                                                      |        |       |       |       |       |          |       |          |       |          |     |
|---------------------|--------------|----------------------------------------------------------------------|--------|-------|-------|-------|-------|----------|-------|----------|-------|----------|-----|
| ENSMMUG00000007294  | SEC24D       | SEC24 Homolog D, COPII Coat Complex Component                        | 2.21   | 0.49  | 0.78  | 1.20  | -2.72 | 7.54E-03 | 1.32  | 2.48E-01 | -0.19 | 9.58E-01 | M-2 |
| ENSMMUG00000039320  | LOC106998515 | Uncharacterized LOC106998515                                         | 14.64  | 3.39  | 2.87  | 6.18  | -4.87 | 1.66E-05 | 0.84  | 5.85E-01 | -0.43 | 9.00E-01 | M-2 |
| ENSMMUG00000039094  | TMEM154      | Transmembrane Protein 154                                            | 0.83   | 0.04  | 0.04  | 0.44  | -5.98 | 3.23E-02 | 0.79  | 8.47E-01 | 4.61  | 2.77E-01 | M-2 |
| ENSMMUG0000004934   | MND1         | Meiotic Nuclear Divisions 1                                          | 2.06   | 0.63  | 2.72  | 4.24  | -2.51 | 1.48E-02 | 1.60  | 1.41E-01 | 1.69  | 2.79E-01 | M-2 |
| ENSMMUG0000009001   | TMEM131L     | Transmembrane 131 Like                                               | 18.42  | 5.49  | 1.48  | 0.50  | -2.29 | 8.15E-03 | -1.51 | 9.77E-02 | -1.50 | 2.56E-01 | M-2 |
| ENSMMUG00000015847  | TLR2         | Toll Like Receptor 2                                                 | 1.43   | 0.11  | 0.01  | 0.05  | -6.19 | 2.42E-05 | -2.40 | 2.23E-01 | 3.41  | 1.66E-01 | M-2 |
| ENSMMUG00000021717  | VAPB         | VAMP Associated Protein B And C                                      | 15.17  | 7.23  | 13.28 | 16.30 | -1.78 | 2.09E-02 | 1.41  | 7.38E-02 | 0.45  | 8.06E-01 | M-2 |
| ENSMMUG00000004644  | ETFDH        | Electron Transfer Flavoprotein Dehydrogenase                         | 13.62  | 5.65  | 1.92  | 3.89  | -2.21 | 2.15E-02 | -0.39 | 7.61E-01 | 0.05  | 9.89E-01 | M-2 |
| ENSMMUG00000015921  | CBR4         | Carbonyl Reductase 4                                                 | 7.11   | 1.11  | 2.63  | 3.75  | -2.77 | 1.93E-04 | 1.11  | 1.93E-01 | -0.12 | 9.66E-01 | M-2 |
| ENSMMUG00000010232  | C5H4orf27    | Chromosome 5 Open Reading Frame, Human C4orf27                       | 124.55 | 8.46  | 5.33  | 7.93  | -4.32 | 3.50E-10 | -1.13 | 1.71E-01 | 0.66  | 6.79E-01 | M-2 |
| ENSMMUG00000002401  | SAP30        | Sin3A Associated Protein 30                                          | 24.29  | 3.94  | 3.99  | 1.93  | -2.76 | 6.29E-04 | -1.00 | 2.97E-01 | 0.48  | 8.16E-01 | M-2 |
| ENSMMUG00000048816  | HAND2        | Heart And Neural Crest Derivatives Expressed 2                       | 1.91   | 0.97  | 0.08  | 0.02  | -4.25 | 1.18E-02 | -0.90 | 6.91E-01 | -4.55 | 5.13E-02 | M-2 |
| ENSMMUG00000007394  | NEIL3        | Nei Like DNA Glycosylase 3                                           | 43.50  | 8.51  | 7.41  | 7.13  | -2.38 | 1.49E-02 | -1.43 | 1.71E-01 | 0.77  | 7.11E-01 | M-2 |
| ENSMMUG00000012053  |              |                                                                      | 41.69  | 13.94 | 19.59 | 32.82 | -2.33 | 5.00E-03 | 0.62  | 5.46E-01 | 1.32  | 3.23E-01 | M-2 |
| ENSMMUG00000039058  | LOC701749    | Protein FAM149A                                                      | 4.28   | 0.86  | 1.15  | 1.11  | -2.64 | 1.11E-02 | 0.82  | 5.12E-01 | -0.47 | 8.61E-01 | M-2 |
| ENSMMUG00000022331  | MCM3AP       | Minichromosome Maintenance Complex Component 3 Associated Protein    | 25.11  | 7.69  | 13.26 | 6.65  | -1.83 | 2.52E-03 | -0.32 | 6.99E-01 | -0.48 | 7.20E-01 | M-2 |
| ENSMMUG00000020654  | WRB          | Tryptophan Rich Basic Protein                                        | 60.48  | 11.50 | 13.00 | 11.16 | -2.13 | 3.53E-03 | 0.14  | 8.94E-01 | -0.46 | 7.96E-01 | M-2 |
| ENSMMUG00000017505  | TTC3         | Tetratricopeptide Repeat Domain 3                                    | 17.26  | 6.69  | 5.24  | 3.37  | -1.40 | 2.68E-02 | -0.86 | 2.04E-01 | 0.21  | 9.04E-01 | M-2 |
| ENSMMUG00000010336  | DOPEY2       | Dopey Family Member 2                                                | 8.26   | 2.51  | 1.72  | 1.72  | -1.99 | 2.45E-03 | -0.36 | 6.83E-01 | -1.18 | 2.46E-01 | M-2 |
| ENSMMUG00000004605  | CLIC6        | Chloride Intracellular Channel 6                                     | 4.19   | 1.08  | 0.06  | 0.05  | -6.73 | 3.25E-07 | -1.36 | 4.55E-01 | -3.72 | 6.94E-02 | M-2 |
| ENSMMUG00000004624  | SYNJ1        | Synaptojanin 1                                                       | 33.87  | 6.58  | 8.88  | 9.52  | -2.46 | 6.23E-11 | 0.45  | 3.46E-01 | 0.30  | 7.51E-01 | M-2 |
| ENSMMUG00000010304  | C3H21orf59   | Chromosome 3 Open Reading Frame, Human C21orf59                      | 17.83  | 5.26  | 2.88  | 4.04  | -1.48 | 2.74E-02 | -1.21 | 7.53E-02 | 0.36  | 8.22E-01 | M-2 |
| ENSMMUG00000017056  | SUN1         | Sad1 And UNC84 Domain Containing 1                                   | 34.47  | 5.68  | 4.56  | 4.87  | -2.39 | 3.25E-04 | -0.35 | 7.06E-01 | 0.28  | 8.83E-01 | M-2 |
| ENSMMUG00000007970  | CCZ1         | CCZ1 Homolog, Vacuolar Protein Trafficking And Biogenesis Associated | 117.95 | 37.42 | 24.87 | 18.07 | -1.75 | 1.44E-03 | -0.52 | 4.33E-01 | -0.38 | 7.71E-01 | M-2 |
| ENSMMUG00000020086  | POR          | P450 (cytochrome) Oxidoreductase                                     | 18.01  | 6.08  | 3.37  | 4.03  | -2.33 | 2.32E-02 | -0.50 | 7.13E-01 | -0.27 | 9.32E-01 | M-2 |
| ENSMMUG00000001003  | RCC1L        | RCC1 Like                                                            | 2.66   | 0.40  | 0.81  | 1.56  | -2.23 | 1.47E-02 | 0.42  | 7.29E-01 | 2.02  | 1.11E-01 | M-2 |
| ENSMMUG00000048526  |              |                                                                      | 1.43   | 0.45  | 0.17  | 0.03  | -3.69 | 1.83E-02 | -1.43 | 4.44E-01 | -2.82 | 2.44E-01 | M-2 |
| ENSMMUG00000004591  | LANCL2       | LanC Like 2                                                          | 24.07  | 12.44 | 11.29 | 7.02  | -1.98 | 7.59E-03 | 0.57  | 5.31E-01 | -0.04 | 9.88E-01 | M-2 |
| ENSMMUG00000000246  | COBL         | Cordon-bleu WH2 Repeat Protein                                       | 3.37   | 1.24  | 2.62  | 5.56  | -2.10 | 2.96E-02 | 1.58  | 1.13E-01 | -0.46 | 8.45E-01 | M-2 |
| ENSMMUG00000001799  | CCM2         | CCM2 Scaffolding Protein                                             | 10.15  | 1.34  | 4.62  | 13.08 | -2.80 | 8.55E-03 | 0.82  | 5.27E-01 | 2.54  | 7.22E-02 | M-2 |
| ENSMMUG00000002651  | OGDH         | Oxoglutarate Dehydrogenase                                           | 16.92  | 7.83  | 9.02  | 11.36 | -1.32 | 4.93E-02 | 0.59  | 4.38E-01 | -0.21 | 9.10E-01 | M-2 |
| ENSMMUG00000002645  |              |                                                                      | 58.15  | 22.85 | 16.68 | 8.59  | -1.66 | 2.67E-02 | -0.76 | 3.72E-01 | -0.87 | 5.11E-01 | M-2 |
| ENSMMUG00000000779  | NUDCD3       | NudC Domain Containing 3                                             | 1.06   | 0.43  | 1.53  | 2.41  | -3.60 | 6.35E-03 | 1.35  | 3.84E-01 | 1.00  | 7.33E-01 | M-2 |
| ENSMMUG00000019023  | COA1         | Cytochrome C Oxidase Assembly Factor 1 Homolog (S. Cerevisiae)       | 47.49  | 5.68  | 5.40  | 7.57  | -3.10 | 2.84E-06 | -0.38 | 6.87E-01 | 0.00  | 9.99E-01 | M-2 |
| ENSMMUG000000044197 | INHBA        | Inhibin Beta A Subunit                                               | 1.20   | 0.97  | 0.11  | 0.06  | -2.91 | 3.50E-02 | -1.50 | 3.35E-01 | 0.38  | 9.29E-01 | M-2 |
| ENSMMUG000000011770 | AVL9         | AVL9 Cell Migration Associated                                       | 3.12   | 0.82  | 0.76  | 2.93  | -2.35 | 2.34E-02 | -0.24 | 8.71E-01 | 1.64  | 3.04E-01 | M-2 |
| ENSMMUG000000011761 | MINDY4       | MINDY Lysine 48 Deubiquitinase 4                                     | 2.59   | 0.40  | 0.24  | 0.37  | -3.22 | 5.01E-03 | 0.26  | 8.81E-01 | -0.27 | 9.50E-01 | M-2 |

|                    |           |                                                  |        |       |       |       |       |          |       |          |       |          |     |
|--------------------|-----------|--------------------------------------------------|--------|-------|-------|-------|-------|----------|-------|----------|-------|----------|-----|
| ENSMMUG00000046257 |           |                                                  | 0.58   | 0.02  | 0.01  | 2.59  | -5.26 | 4.21E-02 | 2.52  | 4.09E-01 | 5.49  | 1.13E-01 | M-2 |
| ENSMMUG00000013458 | HOXA7     | Homeobox A7                                      | 15.12  | 1.35  | 1.87  | 0.55  | -3.79 | 1.72E-05 | -1.31 | 2.07E-01 | 0.59  | 7.99E-01 | M-2 |
| ENSMMUG00000016938 | GSDME     | Gasdermin E                                      | 5.98   | 0.30  | 2.84  | 0.09  | -3.42 | 5.94E-03 | -2.26 | 1.05E-01 | 0.90  | 7.85E-01 | M-2 |
| ENSMMUG00000000517 | FAM126A   | Family With Sequence Similarity 126 Member A     | 4.93   | 1.65  | 3.66  | 4.79  | -2.16 | 4.63E-02 | 1.38  | 2.33E-01 | 0.62  | 8.04E-01 | M-2 |
| ENSMMUG00000021684 | SP4       | Sp4 Transcription Factor                         | 4.19   | 2.06  | 3.49  | 3.21  | -2.78 | 1.61E-03 | 0.77  | 4.81E-01 | 0.18  | 9.54E-01 | M-2 |
| ENSMMUG00000039167 | ETV1      | ETS Variant 1                                    | 0.03   | 0.12  | 0.16  | 1.40  | -4.37 | 4.43E-02 | 3.98  | 7.22E-02 | 0.75  | 8.98E-01 | M-2 |
| ENSMMUG00000011785 | SEMA3C    | Semaphorin 3C                                    | 1.58   | 0.35  | 0.16  | 0.56  | -5.22 | 1.13E-03 | 0.48  | 8.40E-01 | 3.25  | 1.71E-01 | M-2 |
| ENSMMUG00000016393 | CASD1     | CAS1 Domain Containing 1                         | 4.37   | 1.20  | 1.80  | 1.88  | -2.93 | 9.06E-03 | 0.21  | 9.01E-01 | 0.95  | 6.88E-01 | M-2 |
| ENSMMUG00000008011 | PON1      | Paraoxonase 1                                    | 6.36   | 0.43  | 0.43  | 0.39  | -5.78 | 1.99E-04 | -1.94 | 3.47E-01 | 1.87  | 5.94E-01 | M-2 |
| ENSMMUG00000008013 |           |                                                  | 2.56   | 1.12  | 0.45  | 0.17  | -4.46 | 2.00E-02 | 3.48  | 8.78E-02 | -4.33 | 1.16E-01 | M-2 |
| ENSMMUG00000022728 | ZSCAN25   | Zinc Finger And SCAN Domain Containing 25        | 3.51   | 0.98  | 1.97  | 1.47  | -2.98 | 2.60E-02 | -0.13 | 9.48E-01 | 1.75  | 4.35E-01 | M-2 |
| ENSMMUG00000018402 | C3H7orf43 | Chromosome 3 Open Reading Frame, Human C7orf43   | 3.15   | 0.71  | 1.20  | 1.78  | -2.80 | 1.67E-02 | 0.44  | 7.85E-01 | 0.59  | 8.37E-01 | M-2 |
| ENSMMUG00000048302 | AGFG2     | ArfGAP With FG Repeats 2                         | 81.28  | 10.29 | 9.90  | 6.14  | -3.49 | 1.88E-05 | -1.22 | 1.99E-01 | -0.20 | 9.46E-01 | M-2 |
| ENSMMUG00000040482 | GIGYF1    | GRB10 Interacting GYF Protein 1                  | 4.06   | 1.50  | 0.62  | 1.99  | -2.41 | 3.57E-02 | -1.28 | 3.16E-01 | 1.04  | 6.45E-01 | M-2 |
| ENSMMUG00000030385 | MYL10     | Myosin Light Chain 10                            | 3.36   | 0.04  | 0.09  | 0.05  | -7.46 | 1.67E-06 | 1.96  | 3.34E-01 | -0.92 | 8.45E-01 | M-2 |
| ENSMMUG00000011831 | PNPLA8    | Patatin Like Phospholipase Domain Containing 8   | 16.96  | 5.82  | 6.19  | 3.54  | -1.98 | 1.82E-03 | -0.24 | 7.93E-01 | -0.06 | 9.81E-01 | M-2 |
| ENSMMUG00000002440 | FAM3C     | Family With Sequence Similarity 3 Member C       | 33.27  | 12.34 | 18.41 | 27.48 | -1.61 | 2.39E-02 | 0.56  | 5.04E-01 | 0.70  | 6.07E-01 | M-2 |
| ENSMMUG00000045906 |           |                                                  | 1.66   | 0.01  | 0.01  | 0.87  | -6.34 | 2.24E-03 | 1.04  | 7.37E-01 | 4.58  | 1.28E-01 | M-2 |
| ENSMMUG00000000917 | AKR1B1    | Aldo-keto Reductase Family 1 Member B            | 113.64 | 17.68 | 9.89  | 12.17 | -2.81 | 1.14E-03 | -0.98 | 3.36E-01 | 0.26  | 9.20E-01 | M-2 |
| ENSMMUG00000007557 |           |                                                  | 23.93  | 13.40 | 6.67  | 4.01  | -2.32 | 3.68E-02 | 0.88  | 5.09E-01 | -2.41 | 1.23E-01 | M-2 |
| ENSMMUG00000006548 | KIAA1549  | KIAA1549 Ortholog                                | 6.83   | 1.08  | 0.53  | 0.30  | -3.20 | 6.98E-04 | -1.17 | 2.91E-01 | -1.13 | 5.31E-01 | M-2 |
| ENSMMUG00000043537 |           |                                                  | 30.96  | 12.68 | 0.91  | 4.78  | -3.46 | 1.78E-02 | -1.92 | 2.49E-01 | -0.02 | 9.97E-01 | M-2 |
| ENSMMUG00000012628 | GSTK1     | Glutathione S-transferase Kappa 1                | 3.20   | 0.55  | 0.60  | 0.66  | -5.34 | 9.14E-04 | 2.13  | 2.56E-01 | 0.40  | 9.46E-01 | M-2 |
| ENSMMUG00000046317 |           |                                                  | 10.32  | 2.93  | 0.51  | 0.29  | -3.05 | 2.39E-02 | -1.69 | 2.70E-01 | -2.22 | 3.05E-01 | M-2 |
| ENSMMUG00000005136 | TCAF1     | TRPM8 Channel Associated Factor 1                | 28.17  | 4.44  | 2.22  | 11.53 | -3.33 | 6.03E-04 | -0.13 | 9.34E-01 | 1.24  | 4.88E-01 | M-2 |
| ENSMMUG00000018710 | ZNF746    | Zinc Finger Protein 746                          | 28.82  | 4.61  | 3.23  | 3.81  | -2.88 | 6.93E-05 | -0.56 | 5.53E-01 | 0.36  | 8.57E-01 | M-2 |
| ENSMMUG00000018707 |           |                                                  | 4.39   | 0.67  | 1.97  | 2.24  | -3.11 | 3.56E-02 | 1.58  | 3.40E-01 | -0.24 | 9.64E-01 | M-2 |
| ENSMMUG00000006682 | CHPF2     | Chondroitin Polymerizing Factor 2                | 1.10   | 0.13  | 0.39  | 0.98  | -4.94 | 4.90E-03 | 1.74  | 4.01E-01 | 4.26  | 6.31E-02 | M-2 |
| ENSMMUG00000012238 | GALNT11   | Polypeptide N-acetylgalactosaminyltransferase 11 | 37.19  | 10.52 | 19.89 | 36.18 | -2.28 | 1.66E-03 | 1.19  | 1.31E-01 | 0.22  | 9.20E-01 | M-2 |
| ENSMMUG00000007212 | KMT2C     | Lysine Methyltransferase 2C                      | 128.13 | 53.59 | 31.82 | 30.93 | -1.39 | 2.63E-03 | -0.49 | 3.73E-01 | -0.28 | 8.04E-01 | M-2 |
| ENSMMUG00000000752 | PDCD6     | Programmed Cell Death 6                          | 15.09  | 3.47  | 7.85  | 4.98  | -2.40 | 2.42E-03 | 1.06  | 2.37E-01 | 0.41  | 8.42E-01 | M-2 |
| ENSMMUG00000005199 | LPCAT1    | Lysophosphatidylcholine Acyltransferase 1        | 16.09  | 6.68  | 11.29 | 13.69 | -1.74 | 2.25E-02 | 1.46  | 5.78E-02 | -0.55 | 7.40E-01 | M-2 |
| ENSMMUG00000018745 | C6H5orf49 | Chromosome 6 Open Reading Frame, Human C5orf49   | 3.57   | 0.00  | 0.19  | 0.44  | -7.03 | 2.15E-03 | 2.82  | 3.08E-01 | 0.74  | 9.13E-01 | M-2 |
| ENSMMUG00000021942 | ANKH      | ANKH Inorganic Pyrophosphate Transport Regulator | 5.73   | 1.32  | 2.99  | 5.99  | -2.68 | 4.50E-03 | 0.92  | 4.09E-01 | 1.37  | 3.86E-01 | M-2 |
| ENSMMUG00000013467 | AMACR     | Alpha-methylacyl-CoA Racemase                    | 0.70   | 0.19  | 0.60  | 0.80  | -3.32 | 4.88E-02 | 1.91  | 2.95E-01 | 1.98  | 4.83E-01 | M-2 |
| ENSMMUG00000030136 |           |                                                  | 3.95   | 1.05  | 2.44  | 1.81  | -1.77 | 3.44E-02 | 0.97  | 2.93E-01 | 0.35  | 8.74E-01 | M-2 |
| ENSMMUG00000004860 | FST       | Follistatin                                      | 4.28   | 0.15  | 0.18  | 0.21  | -6.20 | 4.28E-05 | -0.20 | 9.38E-01 | 0.37  | 9.47E-01 | M-2 |
| ENSMMUG00000017386 | DDX4      | DEAD-box Helicase 4                              | 19.13  | 6.46  | 5.31  | 2.83  | -2.44 | 1.56E-03 | 0.34  | 7.48E-01 | -1.40 | 2.39E-01 | M-2 |
| ENSMMUG00000016522 | NLN       | Neurolysin                                       | 3.40   | 1.37  | 7.07  | 9.28  | -1.90 | 3.03E-02 | 1.32  | 1.49E-01 | 2.16  | 5.29E-02 | M-2 |
| ENSMMUG00000048478 |           |                                                  | 25.75  | 2.51  | 1.43  | 0.80  | -2.99 | 4.00E-02 | -1.89 | 2.63E-01 | -0.31 | 9.57E-01 | M-2 |
| ENSMMUG00000015175 | MCCC2     | Methylcrotonoyl-CoA Carboxylase 2                | 12.93  | 4.31  | 2.93  | 2.76  | -2.01 | 2.68E-02 | -1.44 | 1.28E-01 | 1.91  | 1.23E-01 | M-2 |
| ENSMMUG00000015433 | TMEM171   | Transmembrane Protein 171                        | 23.90  | 0.36  | 0.31  | 0.11  | -6.29 | 1.38E-11 | -0.65 | 6.45E-01 | -1.71 | 3.85E-01 | M-2 |
| ENSMMUG00000006146 | POC5      | POC5 Centriolar Protein                          | 22.85  | 9.06  | 5.96  | 5.93  | -1.88 | 9.76E-03 | -0.71 | 4.02E-01 | 0.40  | 8.25E-01 | M-2 |

|                     |           |                                                                                        |       |      |       |       |       |          |       |          |       |          |     |
|---------------------|-----------|----------------------------------------------------------------------------------------|-------|------|-------|-------|-------|----------|-------|----------|-------|----------|-----|
| ENSMMUG00000019887  | SV2C      | Synaptic Vesicle Glycoprotein 2C                                                       | 1.66  | 0.58 | 0.04  | 0.02  | -5.81 | 7.88E-04 | -0.05 | 9.88E-01 | -4.53 | 9.41E-02 | M-2 |
| ENSMMUG00000020180  | CETN3     | Centrin 3                                                                              | 23.11 | 6.74 | 16.56 | 9.63  | -3.24 | 2.45E-03 | 2.05  | 7.07E-02 | 0.01  | 9.99E-01 | M-2 |
| ENSMMUG00000006209  | NR2F1     | Nuclear Receptor Subfamily 2 Group F Member 1                                          | 0.35  | 0.01 | 0.59  | 0.98  | -5.07 | 4.19E-02 | 2.50  | 3.90E-01 | 3.10  | 4.40E-01 | M-2 |
| ENSMMUG00000005312  | GLRX      | Glutaredoxin                                                                           | 20.25 | 2.53 | 4.50  | 24.17 | -4.05 | 1.15E-03 | 1.52  | 2.95E-01 | 2.62  | 1.51E-01 | M-2 |
| ENSMMUG00000018542  | LNPEP     | Leucyl And Cystinyl Aminopeptidase                                                     | 4.27  | 1.74 | 0.96  | 0.45  | -3.06 | 7.22E-03 | -0.45 | 7.76E-01 | -1.11 | 6.27E-01 | M-2 |
| ENSMMUG00000020502  | KCNN2     | Potassium Calcium-activated Channel Subfamily N Member 2                               | 16.06 | 2.80 | 2.64  | 0.38  | -2.98 | 9.40E-03 | -0.96 | 4.85E-01 | -0.87 | 7.35E-01 | M-2 |
| ENSMMUG00000017684  | TNFAIP8   | TNF Alpha Induced Protein 8                                                            | 10.33 | 1.19 | 1.54  | 1.37  | -2.81 | 1.31E-03 | -1.48 | 1.23E-01 | 1.28  | 4.04E-01 | M-2 |
| ENSMMUG00000007899  | GRAMD2B   | GRAM Domain Containing 2B                                                              | 3.40  | 0.70 | 0.63  | 1.10  | -3.04 | 4.81E-02 | -0.72 | 7.27E-01 | 0.68  | 8.63E-01 | M-2 |
| ENSMMUG000000037456 | ISOC1     | Isochorismatase Domain Containing 1                                                    | 3.96  | 0.93 | 2.17  | 4.91  | -2.06 | 2.66E-02 | 0.73  | 5.09E-01 | 1.23  | 4.31E-01 | M-2 |
| ENSMMUG000000047956 | CDC42SE2  | CDC42 Small Effector 2                                                                 | 24.38 | 6.66 | 14.37 | 19.08 | -1.95 | 1.41E-04 | 0.65  | 2.87E-01 | 0.16  | 9.19E-01 | M-2 |
| ENSMMUG000000003133 | IL4       | Interleukin 4                                                                          | 4.07  | 0.46 | 3.57  | 0.02  | -5.45 | 3.86E-03 | -4.15 | 5.20E-02 | 4.15  | 1.90E-01 | M-2 |
| ENSMMUG000000038078 | TXNDC15   | Thioredoxin Domain Containing 15                                                       | 1.40  | 0.47 | 0.77  | 1.40  | -2.75 | 7.73E-03 | 1.48  | 1.90E-01 | -0.12 | 9.74E-01 | M-2 |
| ENSMMUG00000001951  | SLC25A48  | Solute Carrier Family 25 Member 48                                                     | 3.32  | 0.07 | 0.04  | 0.04  | -5.87 | 4.39E-04 | -1.12 | 6.37E-01 | 0.62  | 9.12E-01 | M-2 |
| ENSMMUG00000001344  | SPOCK1    | SPARC/osteonectin, Cwcv And Kazal Like Domains Proteoglycan 1                          | 5.58  | 0.81 | 0.26  | 0.13  | -3.62 | 3.68E-03 | -1.77 | 2.27E-01 | -0.76 | 8.27E-01 | M-2 |
| ENSMMUG000000011925 | KLHL3     | Kelch Like Family Member 3                                                             | 13.64 | 1.59 | 2.54  | 0.17  | -4.27 | 7.88E-04 | -0.58 | 7.46E-01 | -2.88 | 1.32E-01 | M-2 |
| ENSMMUG000000018744 | DNAJC18   | DnaJ Heat Shock Protein Family (Hsp40) Member C18                                      | 4.51  | 0.92 | 0.45  | 0.04  | -3.87 | 1.84E-02 | -1.20 | 5.62E-01 | -3.75 | 1.21E-01 | M-2 |
| ENSMMUG000000014636 | PSD2      | Pleckstrin And Sec7 Domain Containing 2                                                | 3.12  | 1.06 | 0.36  | 0.57  | -3.81 | 8.40E-04 | -1.10 | 4.36E-01 | 0.80  | 7.71E-01 | M-2 |
| ENSMMUG000000022471 |           |                                                                                        | 4.68  | 0.39 | 0.61  | 1.14  | -7.50 | 3.02E-03 | -0.20 | 9.62E-01 | -2.42 | 6.48E-01 | M-2 |
| ENSMMUG000000021663 | PCYOX1L   | Prenylcysteine Oxidase 1 Like                                                          | 3.92  | 0.46 | 0.10  | 1.34  | -4.08 | 1.61E-03 | -1.79 | 2.55E-01 | 2.39  | 2.56E-01 | M-2 |
| ENSMMUG000000023568 | TIMD4     | T-cell Immunoglobulin And Mucin Domain Containing 4                                    | 2.14  | 0.36 | 1.36  | 0.75  | -3.22 | 4.96E-03 | 0.68  | 6.50E-01 | 0.19  | 9.64E-01 | M-2 |
| ENSMMUG000000021700 | UBLCP1    | Ubiquitin Like Domain Containing CTD Phosphatase 1                                     | 13.55 | 4.04 | 6.14  | 4.48  | -1.64 | 7.13E-03 | 0.22  | 7.99E-01 | 0.47  | 7.27E-01 | M-2 |
| ENSMMUG000000000137 | SNCB      | Synuclein Beta                                                                         | 1.75  | 0.33 | 0.05  | 0.10  | -7.16 | 3.67E-05 | 0.50  | 8.59E-01 | -0.33 | 9.64E-01 | M-2 |
| ENSMMUG000000018758 | RMND5B    | Required For Meiotic Nuclear Division 5 Homolog B                                      | 3.38  | 0.88 | 0.91  | 2.29  | -2.47 | 1.39E-02 | 0.08  | 9.58E-01 | 0.93  | 6.45E-01 | M-2 |
| ENSMMUG00000002484  | ZNF879    | Zinc Finger Protein 879                                                                | 2.81  | 0.34 | 0.30  | 0.71  | -3.68 | 8.59E-04 | -0.64 | 6.69E-01 | 1.42  | 4.84E-01 | M-2 |
| ENSMMUG000000012374 | MGAT4B    | Mannosyl (alpha-1,3-)-glycoprotein Beta-1,4-N-acetylglucosaminyltransferase, Isozyme B | 11.32 | 1.15 | 3.90  | 2.41  | -3.63 | 4.86E-05 | 0.34  | 7.95E-01 | 0.91  | 6.30E-01 | M-2 |
| ENSMMUG000000021055 | SQSTM1    | Sequestosome 1                                                                         | 18.68 | 2.38 | 2.85  | 1.63  | -3.06 | 4.87E-04 | -0.55 | 6.39E-01 | -0.06 | 9.86E-01 | M-2 |
| ENSMMUG000000040959 | LOC723029 | Butyrophilin-like Protein 9                                                            | 2.67  | 0.02 | 0.04  | 0.31  | -6.41 | 4.01E-04 | 0.19  | 9.54E-01 | 3.50  | 2.15E-01 | M-2 |
| ENSMMUG000000031833 | LOC723031 | Butyrophilin-like Protein 9                                                            | 2.04  | 0.04 | 0.04  | 0.21  | -4.33 | 2.30E-02 | -2.28 | 3.29E-01 | 4.85  | 5.82E-02 | M-2 |
| ENSMMUG000000023558 | EXOC2     | Exocyst Complex Component 2                                                            | 7.19  | 2.50 | 1.06  | 3.58  | -2.36 | 3.35E-02 | -1.48 | 2.16E-01 | 1.73  | 3.15E-01 | M-2 |
| ENSMMUG000000014019 | FAM217A   | Family With Sequence Similarity 217 Member A                                           | 1.76  | 0.58 | 0.94  | 0.15  | -4.41 | 3.69E-03 | -2.51 | 1.86E-01 | -0.03 | 9.97E-01 | M-2 |
| ENSMMUG000000042312 |           |                                                                                        | 1.58  | 2.64 | 0.19  | 0.15  | -5.44 | 2.66E-02 | 1.02  | 7.65E-01 | -5.82 | 8.58E-02 | M-2 |
| ENSMMUG000000021601 |           |                                                                                        | 5.79  | 2.06 | 1.69  | 3.34  | -3.49 | 1.38E-02 | 0.34  | 8.68E-01 | 1.80  | 4.61E-01 | M-2 |
| ENSMMUG000000040125 | C4H6orf52 | Chromosome 4 Open Reading Frame, Human C6orf52                                         | 31.35 | 4.21 | 4.50  | 1.47  | -2.87 | 2.52E-04 | -0.13 | 9.16E-01 | -1.58 | 1.95E-01 | M-2 |

|                     |         |                                                                     |        |       |       |        |       |          |       |          |       |          |     |
|---------------------|---------|---------------------------------------------------------------------|--------|-------|-------|--------|-------|----------|-------|----------|-------|----------|-----|
| ENSMMUG00000005406  | TBC1D7  | TBC1 Domain Family Member 7                                         | 13.24  | 3.70  | 3.24  | 3.36   | -2.31 | 3.86E-03 | 0.40  | 7.14E-01 | -0.30 | 8.98E-01 | M-2 |
| ENSMMUG000000047180 |         |                                                                     | 12.96  | 0.83  | 0.11  | 0.12   | -7.32 | 1.14E-03 | 0.32  | 9.34E-01 | 0.30  | 9.73E-01 | M-2 |
| ENSMMUG00000005964  | CMAH    | CMP-N-acetylneuraminic Acid Hydroxylase                             | 15.74  | 4.83  | 2.49  | 0.35   | -3.00 | 2.43E-02 | -0.82 | 6.20E-01 | -1.13 | 6.79E-01 | M-2 |
| ENSMMUG000000011520 | FKBP5   | FK506 Binding Protein 5                                             | 5.79   | 1.59  | 3.14  | 3.57   | -3.50 | 2.43E-03 | 2.16  | 7.85E-02 | 0.51  | 8.71E-01 | M-2 |
| ENSMMUG000000015384 | CLPS    | Colipase                                                            | 1.60   | 0.78  | 1.44  | 9.77   | -3.35 | 2.00E-02 | 1.79  | 2.73E-01 | 2.14  | 3.36E-01 | M-2 |
| ENSMMUG000000011575 | CCDC167 | Coiled-coil Domain Containing 167                                   | 16.48  | 2.26  | 4.01  | 9.35   | -3.20 | 1.02E-02 | 0.38  | 8.29E-01 | 2.31  | 2.09E-01 | M-2 |
| ENSMMUG000000048397 |         |                                                                     | 1.40   | 0.06  | 5.09  | 0.59   | -4.71 | 3.80E-02 | 0.47  | 8.90E-01 | 1.91  | 6.85E-01 | M-2 |
| ENSMMUG00000001634  | BTBD9   | BTB Domain Containing 9                                             | 4.27   | 0.80  | 1.37  | 2.44   | -2.95 | 1.14E-03 | 0.18  | 8.99E-01 | 1.34  | 3.92E-01 | M-2 |
| ENSMMUG000000013922 | TREML2  | Triggering Receptor Expressed On Myeloid Cells Like 2               | 2.12   | 0.17  | 2.45  | 2.90   | -5.53 | 1.03E-05 | 0.07  | 9.74E-01 | 2.22  | 2.80E-01 | M-2 |
| ENSMMUG000000012417 | FRS3    | Fibroblast Growth Factor Receptor Substrate 3                       | 4.95   | 1.05  | 1.18  | 0.35   | -2.81 | 4.73E-02 | 0.58  | 7.54E-01 | -2.58 | 2.10E-01 | M-2 |
| ENSMMUG000000002458 | MUT     | Methylmalonyl-CoA Mutase                                            | 8.94   | 1.79  | 7.16  | 3.45   | -2.23 | 5.92E-03 | 0.24  | 8.37E-01 | 0.61  | 7.39E-01 | M-2 |
| ENSMMUG000000046051 | GLYATL3 | Glycine-N-acyltransferase Like 3                                    | 2.97   | 0.76  | 0.12  | 0.03   | -3.31 | 4.67E-02 | -2.00 | 2.94E-01 | -2.70 | 3.40E-01 | M-2 |
| ENSMMUG000000005573 | LMBRD1  | LMBR1 Domain Containing 1                                           | 15.67  | 5.34  | 6.19  | 6.46   | -2.13 | 1.60E-03 | 1.30  | 7.18E-02 | -1.62 | 8.54E-02 | M-2 |
| ENSMMUG000000010084 | KHDC3L  | KH Domain Containing 3 Like, Subcortical Maternal Complex Member    | 142.16 | 40.02 | 29.72 | 58.49  | -2.56 | 1.26E-03 | -1.43 | 9.56E-02 | 1.67  | 1.49E-01 | M-2 |
| ENSMMUG000000019457 | EZR     | Ezrin                                                               | 151.87 | 60.84 | 79.58 | 157.75 | -1.64 | 5.17E-03 | 0.96  | 1.27E-01 | 0.37  | 7.92E-01 | M-2 |
| ENSMMUG000000007153 | SYNJ2   | Synaptojanin 2                                                      | 14.34  | 4.14  | 1.76  | 6.27   | -2.05 | 8.26E-03 | -0.72 | 4.36E-01 | 1.26  | 3.00E-01 | M-2 |
| ENSMMUG000000047033 | ULBP3   | UL16 Binding Protein 3                                              | 5.75   | 1.89  | 0.14  | 0.19   | -5.51 | 1.40E-06 | -1.86 | 1.86E-01 | -0.61 | 8.59E-01 | M-2 |
| ENSMMUG000000000123 | NHSL1   | NHS Like 1                                                          | 11.30  | 2.78  | 10.00 | 8.01   | -1.91 | 6.50E-03 | 1.28  | 8.18E-02 | 0.01  | 9.97E-01 | M-2 |
| ENSMMUG000000029439 |         |                                                                     | 24.93  | 5.61  | 7.62  | 4.55   | -2.67 | 6.44E-05 | 0.62  | 4.65E-01 | -0.70 | 6.20E-01 | M-2 |
| ENSMMUG000000003709 | MTFR2   | Mitochondrial Fission Regulator 2                                   | 25.49  | 4.97  | 5.21  | 4.89   | -2.10 | 6.61E-05 | -0.48 | 4.72E-01 | 0.24  | 8.75E-01 | M-2 |
| ENSMMUG000000015354 | RNF146  | Ring Finger Protein 146                                             | 6.75   | 1.70  | 2.69  | 4.90   | -2.67 | 2.42E-02 | 1.26  | 3.43E-01 | 0.09  | 9.82E-01 | M-2 |
| ENSMMUG000000013304 | MAN1A1  | Mannosidase Alpha Class 1A Member 1                                 | 3.05   | 0.63  | 0.38  | 0.47   | -2.42 | 2.80E-02 | -1.71 | 1.44E-01 | 1.33  | 4.98E-01 | M-2 |
| ENSMMUG000000013302 | FAM184A | Family With Sequence Similarity 184 Member A                        | 4.29   | 1.17  | 3.00  | 4.29   | -2.92 | 8.44E-04 | 1.66  | 7.79E-02 | -0.39 | 8.72E-01 | M-2 |
| ENSMMUG000000008525 | MCM9    | Minichromosome Maintenance 9 Homologous Recombination Repair Factor | 6.07   | 1.51  | 1.94  | 1.32   | -2.39 | 1.26E-02 | -0.21 | 8.78E-01 | -0.95 | 6.07E-01 | M-2 |
| ENSMMUG000000003072 | GPRC6A  | G Protein-coupled Receptor Class C Group 6 Member A                 | 1.61   | 2.45  | 0.04  | 0.02   | -4.91 | 9.25E-03 | -1.43 | 5.67E-01 | -3.56 | 2.56E-01 | M-2 |
| ENSMMUG000000020538 | FIG4    | FIG4 Phosphoinositide 5-phosphatase                                 | 4.94   | 2.10  | 0.99  | 2.95   | -2.36 | 3.40E-02 | -0.19 | 9.07E-01 | 0.38  | 9.02E-01 | M-2 |
| ENSMMUG000000012837 | WTAP    | WT1 Associated Protein                                              | 25.05  | 13.26 | 11.49 | 14.25  | -1.23 | 4.23E-02 | -0.34 | 6.50E-01 | 0.56  | 6.33E-01 | M-2 |
| ENSMMUG000000015662 | SLC22A1 | Solute Carrier Family 22 Member 1                                   | 3.26   | 0.57  | 0.11  | 0.03   | -3.77 | 6.42E-04 | -2.38 | 6.92E-02 | -2.23 | 2.49E-01 | M-2 |
| ENSMMUG000000040051 |         |                                                                     | 2.76   | 0.47  | 0.12  | 0.05   | -4.05 | 7.22E-03 | -2.08 | 2.37E-01 | 0.93  | 8.13E-01 | M-2 |
| ENSMMUG000000011739 | MPC1    | Mitochondrial Pyruvate Carrier 1                                    | 20.35  | 2.33  | 1.71  | 3.67   | -3.12 | 1.55E-02 | -1.72 | 2.45E-01 | 0.12  | 9.79E-01 | M-2 |
| ENSMMUG000000005670 | RPS6KA2 | Ribosomal Protein S6 Kinase A2                                      | 3.54   | 0.49  | 0.30  | 0.16   | -3.79 | 7.59E-03 | -0.37 | 8.56E-01 | -0.71 | 8.46E-01 | M-2 |
| ENSMMUG000000005673 | RNASET2 | Ribonuclease T2                                                     | 1.62   | 0.38  | 0.33  | 1.39   | -2.59 | 2.11E-02 | -0.32 | 8.39E-01 | 1.81  | 2.93E-01 | M-2 |
| ENSMMUG000000021044 | AFDN    | Afadin, Adherens Junction Formation Factor                          | 24.10  | 14.13 | 17.21 | 21.30  | -0.91 | 2.84E-02 | 0.47  | 3.10E-01 | -0.04 | 9.76E-01 | M-2 |
| ENSMMUG000000019916 | PDCD2   | Programmed Cell Death 2                                             | 22.28  | 2.94  | 8.59  | 14.59  | -2.59 | 4.30E-04 | 1.37  | 8.70E-02 | 0.24  | 9.12E-01 | M-2 |
| ENSMMUG000000012027 | OCA2    | OCA2 Melanosomal Transmembrane Protein                              | 3.12   | 0.86  | 0.52  | 0.26   | -2.99 | 4.14E-02 | -1.99 | 2.08E-01 | -0.43 | 9.20E-01 | M-2 |
| ENSMMUG000000019339 | APBA2   | Amyloid Beta Precursor Protein Binding Family A Member 2            | 3.62   | 0.20  | 0.17  | 0.05   | -4.79 | 4.80E-05 | -1.17 | 4.57E-01 | -0.56 | 8.87E-01 | M-2 |

|                    |            |                                                                |        |       |       |       |       |          |       |          |       |          |     |
|--------------------|------------|----------------------------------------------------------------|--------|-------|-------|-------|-------|----------|-------|----------|-------|----------|-----|
| ENSMMUG00000005278 | AVEN       | Apoptosis And Caspase Activation Inhibitor                     | 40.78  | 3.66  | 2.54  | 3.06  | -3.67 | 2.16E-04 | -1.52 | 1.80E-01 | 1.21  | 5.22E-01 | M-2 |
| ENSMMUG00000017070 | ZSCAN29    | Zinc Finger And SCAN Domain Containing 29                      | 9.39   | 3.44  | 4.23  | 2.33  | -1.47 | 4.29E-02 | -0.46 | 5.98E-01 | -0.14 | 9.58E-01 | M-2 |
| ENSMMUG00000028568 | MIR147B    | MicroRNA 147b                                                  | 49.21  | 0.63  | 1.38  | 0.20  | -8.70 | 8.24E-06 | 2.44  | 3.29E-01 | -2.70 | 4.76E-01 | M-2 |
| ENSMMUG00000002876 | SLC27A2    | Solute Carrier Family 27 Member 2                              | 3.97   | 0.58  | 0.08  | 0.00  | -3.94 | 1.40E-02 | -3.27 | 8.68E-02 | -3.46 | 1.99E-01 | M-2 |
| ENSMMUG00000029628 | CCNB2      | Cyclin B2                                                      | 136.51 | 41.47 | 35.22 | 26.26 | -1.74 | 3.77E-05 | -0.13 | 8.41E-01 | -0.56 | 4.81E-01 | M-2 |
| ENSMMUG00000021338 | CA12       | Carbonic Anhydrase 12                                          | 5.48   | 1.11  | 0.25  | 0.04  | -4.94 | 8.58E-06 | -0.87 | 5.61E-01 | -3.05 | 6.32E-02 | M-2 |
| ENSMMUG00000005749 | PARP16     | Poly(ADP-ribose) Polymerase Family Member 16                   | 11.64  | 2.10  | 2.38  | 0.66  | -2.58 | 6.36E-03 | -0.60 | 6.19E-01 | -1.11 | 5.22E-01 | M-2 |
| ENSMMUG00000016840 | MAP2K1     | Mitogen-activated Protein Kinase Kinase 1                      | 115.08 | 29.51 | 25.72 | 11.81 | -1.75 | 1.73E-02 | -1.35 | 7.38E-02 | 0.44  | 8.00E-01 | M-2 |
| ENSMMUG00000038622 |            |                                                                | 5.94   | 0.32  | 3.12  | 4.06  | -6.49 | 5.55E-04 | 2.64  | 2.34E-01 | 3.76  | 1.68E-01 | M-2 |
| ENSMMUG00000007570 | UACA       | Uveal Autoantigen With Coiled-coil Domains And Ankyrin Repeats | 6.21   | 0.94  | 0.91  | 5.05  | -2.88 | 5.23E-04 | 0.31  | 7.95E-01 | 1.48  | 2.59E-01 | M-2 |
| ENSMMUG00000000490 | SENP8      | SUMO/sentrin Peptidase Family Member, NEDD8 Specific           | 6.11   | 5.40  | 0.77  | 1.04  | -2.84 | 3.05E-02 | -0.65 | 7.04E-01 | -0.96 | 7.35E-01 | M-2 |
| ENSMMUG00000040970 | LOC707197  | Putative Golgin Subfamily A Member 6C                          | 8.59   | 2.98  | 2.17  | 0.59  | -3.10 | 3.50E-03 | -2.02 | 7.50E-02 | 0.52  | 8.52E-01 | M-2 |
| ENSMMUG00000010172 | TSPAN3     | Tetraspanin 3                                                  | 27.56  | 3.83  | 8.29  | 13.19 | -3.12 | 2.16E-06 | 0.18  | 8.56E-01 | 1.34  | 1.99E-01 | M-2 |
| ENSMMUG00000045870 |            |                                                                | 17.19  | 3.94  | 9.22  | 7.10  | -2.67 | 4.96E-02 | -0.59 | 7.41E-01 | 0.61  | 8.59E-01 | M-2 |
| ENSMMUG00000014204 | DNAJA4     | DnaJ Heat Shock Protein Family (Hsp40) Member A4               | 18.88  | 3.48  | 2.64  | 2.91  | -2.51 | 2.09E-02 | -2.10 | 5.68E-02 | 1.01  | 6.37E-01 | M-2 |
| ENSMMUG00000009361 | FAH        | Fumarylacetoacetate Hydrolase                                  | 10.46  | 4.11  | 7.56  | 5.49  | -1.15 | 2.86E-02 | 1.00  | 5.75E-02 | -0.56 | 5.58E-01 | M-2 |
| ENSMMUG00000011560 | STARD5     | StAR Related Lipid Transfer Domain Containing 5                | 2.20   | 1.49  | 0.69  | 1.66  | -5.53 | 1.48E-03 | 2.02  | 3.30E-01 | -1.45 | 7.02E-01 | M-2 |
| ENSMMUG00000015890 | C7H15orf40 | Chromosome 7 Open Reading Frame, Human C15orf40                | 3.50   | 0.94  | 1.85  | 2.28  | -2.83 | 1.16E-02 | 1.55  | 2.03E-01 | 1.79  | 3.09E-01 | M-2 |
| ENSMMUG00000009084 | TM6SF1     | Transmembrane 6 Superfamily Member 1                           | 2.48   | 0.08  | 0.15  | 0.11  | -7.03 | 6.39E-05 | 2.41  | 2.54E-01 | -0.72 | 8.98E-01 | M-2 |
| ENSMMUG00000000556 | HAPLN3     | Hyaluronan And Proteoglycan Link Protein 3                     | 0.39   | 0.00  | 0.75  | 0.94  | -6.08 | 2.42E-03 | 3.67  | 9.85E-02 | 2.44  | 4.71E-01 | M-2 |
| ENSMMUG00000014831 | ZNF710     | Zinc Finger Protein 710                                        | 3.74   | 1.11  | 2.26  | 2.30  | -2.50 | 1.71E-02 | 1.53  | 1.72E-01 | -0.82 | 7.13E-01 | M-2 |
| ENSMMUG00000005220 | SYNM       | Synemin                                                        | 15.91  | 3.07  | 2.27  | 0.66  | -2.40 | 2.91E-03 | -1.05 | 2.49E-01 | -1.96 | 7.64E-02 | M-2 |
| ENSMMUG00000015442 |            |                                                                | 28.76  | 3.85  | 10.49 | 7.08  | -3.63 | 1.45E-04 | -1.10 | 3.47E-01 | 1.10  | 5.62E-01 | M-2 |
| ENSMMUG00000022550 | PRKD1      | Protein Kinase D1                                              | 4.91   | 0.61  | 0.36  | 0.29  | -4.12 | 2.17E-04 | -0.63 | 6.91E-01 | 0.09  | 9.84E-01 | M-2 |
| ENSMMUG00000019692 | SCFD1      | Sec1 Family Domain Containing 1                                | 33.43  | 14.80 | 20.26 | 13.24 | -1.34 | 4.70E-02 | 0.74  | 3.19E-01 | -0.52 | 7.12E-01 | M-2 |
| ENSMMUG00000041943 |            |                                                                | 130.68 | 70.14 | 35.77 | 28.51 | -1.20 | 3.90E-02 | -1.12 | 5.14E-02 | -0.25 | 8.67E-01 | M-2 |
| ENSMMUG00000020374 | NFKBIA     | NFKB Inhibitor Alpha                                           | 75.64  | 13.32 | 8.81  | 3.85  | -2.97 | 4.10E-04 | -0.04 | 9.80E-01 | -0.35 | 8.84E-01 | M-2 |
| ENSMMUG00000017677 | C7H14orf28 | Chromosome 7 Open Reading Frame, Human C14orf28                | 0.94   | 0.22  | 0.92  | 0.61  | -3.02 | 1.77E-02 | 1.67  | 2.29E-01 | 1.14  | 6.54E-01 | M-2 |
| ENSMMUG00000029358 | SAV1       | Salvador Family WW Domain Containing Protein 1                 | 37.60  | 9.40  | 17.50 | 7.00  | -2.41 | 1.42E-03 | 0.72  | 4.32E-01 | -1.17 | 3.51E-01 | M-2 |
| ENSMMUG00000010689 |            |                                                                | 99.27  | 39.86 | 67.78 | 47.34 | -1.56 | 3.38E-02 | 0.98  | 2.08E-01 | -0.57 | 7.07E-01 | M-2 |
| ENSMMUG00000004594 | CGRRF1     | Cell Growth Regulator With Ring Finger Domain 1                | 1.73   | 0.66  | 1.64  | 1.86  | -2.97 | 2.24E-02 | 2.47  | 5.81E-02 | 2.31  | 2.22E-01 | M-2 |
| ENSMMUG00000023041 | TBPL2      | TATA-box Binding Protein Like 2                                | 10.68  | 0.41  | 1.49  | 0.13  | -4.99 | 2.36E-05 | -1.89 | 1.90E-01 | 0.23  | 9.64E-01 | M-2 |
| ENSMMUG00000003509 | PSMA3      | Proteasome Subunit Alpha 3                                     | 113.78 | 60.76 | 66.21 | 72.67 | -0.87 | 4.98E-02 | -0.03 | 9.64E-01 | 0.05  | 9.75E-01 | M-2 |
| ENSMMUG00000001090 | DACT1      | Dishevelled Binding Antagonist Of Beta Catenin 1               | 0.60   | 0.14  | 0.45  | 3.76  | -3.05 | 2.96E-02 | 1.80  | 2.38E-01 | 2.96  | 1.19E-01 | M-2 |

|                     |           |                                                                            |        |       |       |       |       |          |       |          |       |          |     |
|---------------------|-----------|----------------------------------------------------------------------------|--------|-------|-------|-------|-------|----------|-------|----------|-------|----------|-----|
| ENSMMUG00000021070  | DAAM1     | Dishevelled Associated Activator Of Morphogenesis 1                        | 41.41  | 11.47 | 5.68  | 8.47  | -1.74 | 4.21E-03 | -1.07 | 9.85E-02 | 0.49  | 7.08E-01 | M-2 |
| ENSMMUG00000010464  | PPM1A     | Protein Phosphatase, Mg2+/Mn2+ Dependent 1A                                | 10.72  | 5.41  | 9.81  | 5.34  | -1.03 | 4.63E-02 | 0.50  | 3.89E-01 | -0.39 | 7.23E-01 | M-2 |
| ENSMMUG00000002260  | PRKCH     | Protein Kinase C Eta                                                       | 1.84   | 0.11  | 0.38  | 0.50  | -5.85 | 1.78E-04 | 1.20  | 5.54E-01 | 2.40  | 3.66E-01 | M-2 |
| ENSMMUG00000015873  | RAD51B    | RAD51 Paralog B                                                            | 3.74   | 1.01  | 0.77  | 0.84  | -3.03 | 1.98E-02 | -0.89 | 5.87E-01 | 0.60  | 8.64E-01 | M-2 |
| ENSMMUG00000017430  | SMOC1     | SPARC Related Modular Calcium Binding 1                                    | 3.91   | 0.79  | 0.26  | 0.05  | -3.24 | 1.80E-02 | -1.48 | 3.47E-01 | -1.29 | 6.57E-01 | M-2 |
| ENSMMUG00000046579  |           |                                                                            | 1.56   | 0.11  | 0.27  | 0.27  | -5.23 | 4.07E-02 | 2.24  | 4.54E-01 | -1.65 | 7.83E-01 | M-2 |
| ENSMMUG00000004910  | DNAL1     | Dynein Axonemal Light Chain 1                                              | 2.04   | 0.19  | 0.26  | 0.13  | -4.11 | 8.66E-04 | 0.90  | 5.86E-01 | -1.58 | 5.28E-01 | M-2 |
| ENSMMUG00000006566  | ISCA2     | Iron-sulfur Cluster Assembly 2                                             | 50.44  | 9.72  | 28.66 | 14.87 | -2.52 | 1.18E-02 | 1.56  | 1.42E-01 | -0.82 | 6.95E-01 | M-2 |
| ENSMMUG00000004259  | PROX2     | Prospero Homeobox 2                                                        | 1.67   | 0.30  | 0.04  | 0.08  | -4.16 | 1.35E-02 | -1.93 | 3.48E-01 | -1.29 | 7.57E-01 | M-2 |
| ENSMMUG00000048938  | ACYP1     | Acylphosphatase 1                                                          | 4.08   | 1.53  | 1.01  | 5.26  | -4.65 | 6.95E-03 | 1.29  | 5.49E-01 | 0.65  | 8.95E-01 | M-2 |
| ENSMMUG000000023627 | ADCK1     | AarF Domain Containing Kinase 1                                            | 1.25   | 0.36  | 1.06  | 1.71  | -3.73 | 5.89E-03 | 1.85  | 2.19E-01 | -0.04 | 9.94E-01 | M-2 |
| ENSMMUG00000008964  | DGLUCY    | D-glutamate Cyclase                                                        | 5.13   | 1.12  | 0.91  | 1.25  | -2.58 | 7.36E-03 | -1.65 | 1.08E-01 | 1.85  | 1.95E-01 | M-2 |
| ENSMMUG00000012388  | UNC79     | Unc-79 Homolog, NALCN Channel Complex Subunit                              | 1.20   | 0.11  | 0.16  | 0.35  | -3.94 | 1.09E-03 | 0.20  | 9.17E-01 | 0.02  | 9.98E-01 | M-2 |
| ENSMMUG000000023780 | IFI27     | Interferon Alpha Inducible Protein 27                                      | 6.29   | 0.20  | 0.02  | 0.16  | -6.51 | 3.97E-02 | -0.23 | 9.62E-01 | 1.86  | 8.05E-01 | M-2 |
| ENSMMUG00000005845  | RCOR1     | REST Corepressor 1                                                         | 44.40  | 15.66 | 21.31 | 30.63 | -1.82 | 6.97E-04 | 0.50  | 4.48E-01 | 0.74  | 4.39E-01 | M-2 |
| ENSMMUG00000011752  | TRAF3     | TNF Receptor Associated Factor 3                                           | 11.65  | 1.75  | 1.14  | 1.09  | -2.95 | 1.66E-04 | -0.61 | 5.48E-01 | -0.57 | 7.64E-01 | M-2 |
| ENSMMUG00000018121  | ZFYVE21   | Zinc Finger FYVE-type Containing 21                                        | 23.43  | 3.12  | 11.93 | 10.60 | -3.36 | 2.23E-03 | 1.54  | 2.14E-01 | -0.45 | 8.83E-01 | M-2 |
| ENSMMUG00000043795  | ARSH      | Arylsulfatase Family Member H                                              | 5.96   | 0.45  | 0.13  | 0.03  | -5.39 | 1.64E-04 | -1.09 | 5.69E-01 | 0.20  | 9.74E-01 | M-2 |
| ENSMMUG00000018194  | PNPLA4    | Patatin Like Phospholipase Domain Containing 4                             | 28.24  | 5.69  | 3.99  | 1.70  | -2.65 | 3.99E-02 | -2.46 | 5.90E-02 | 2.13  | 2.81E-01 | M-2 |
| ENSMMUG000000022616 | TCEANC    | Transcription Elongation Factor A N-terminal And Central Domain Containing | 16.33  | 3.72  | 1.61  | 2.26  | -2.08 | 4.33E-02 | -1.40 | 2.01E-01 | 0.92  | 6.48E-01 | M-2 |
| ENSMMUG00000005263  | CXHXorf38 | Chromosome X Open Reading Frame, Human CXorf38                             | 13.45  | 6.07  | 2.95  | 6.17  | -1.90 | 3.22E-02 | -1.05 | 2.79E-01 | 1.44  | 2.77E-01 | M-2 |
| ENSMMUG00000010617  | CCDC120   | Coiled-coil Domain Containing 120                                          | 11.57  | 2.84  | 1.53  | 2.06  | -2.01 | 4.21E-02 | -1.01 | 3.58E-01 | 0.56  | 8.06E-01 | M-2 |
| ENSMMUG00000017358  | BMP15     | Bone Morphogenetic Protein 15                                              | 339.64 | 35.73 | 16.76 | 1.39  | -3.48 | 1.11E-05 | -1.43 | 1.10E-01 | -2.09 | 6.20E-02 | M-2 |
| ENSMMUG00000007345  | MAGED2    | MAGE Family Member D2                                                      | 1.95   | 0.27  | 0.57  | 0.68  | -3.93 | 5.38E-03 | -0.45 | 8.26E-01 | 3.09  | 1.15E-01 | M-2 |
| ENSMMUG000000023236 | CHIC1     | Cysteine Rich Hydrophobic Domain 1                                         | 4.57   | 0.22  | 0.04  | 0.00  | -6.49 | 1.38E-03 | -0.96 | 7.61E-01 | -2.10 | 6.49E-01 | M-2 |
| ENSMMUG000000021204 | UPRT      | Uracil Phosphoribosyltransferase Homolog                                   | 1.33   | 0.12  | 0.40  | 0.78  | -4.59 | 4.87E-02 | 0.48  | 8.86E-01 | 1.28  | 8.12E-01 | M-2 |
| ENSMMUG00000009671  |           |                                                                            | 2.71   | 0.95  | 0.79  | 0.47  | -1.64 | 3.58E-03 | -0.59 | 3.79E-01 | -0.06 | 9.76E-01 | M-2 |
| ENSMMUG00000016777  | LOC694923 | Dachshund Homolog 2                                                        | 2.02   | 0.03  | 0.02  | 0.30  | -5.20 | 7.07E-03 | -2.32 | 3.39E-01 | 3.14  | 3.24E-01 | M-2 |
| ENSMMUG00000018770  | TCEAL2    | Transcription Elongation Factor A Like 2                                   | 12.39  | 2.01  | 2.89  | 2.53  | -3.00 | 3.07E-02 | -0.12 | 9.54E-01 | -0.84 | 7.96E-01 | M-2 |
| ENSMMUG000000038049 |           |                                                                            | 3.10   | 0.12  | 0.56  | 1.45  | -4.18 | 4.90E-02 | -3.23 | 1.81E-01 | 4.80  | 1.00E-01 | M-2 |
| ENSMMUG000000039832 |           |                                                                            | 4.66   | 0.16  | 0.96  | 0.63  | -6.93 | 1.47E-02 | 3.90  | 2.15E-01 | -0.20 | 9.85E-01 | M-2 |
| ENSMMUG000000045572 |           |                                                                            | 12.20  | 7.32  | 7.86  | 7.13  | -1.08 | 2.80E-02 | 0.50  | 3.76E-01 | -0.50 | 5.99E-01 | M-2 |
| ENSMMUG00000000903  | LHFPL1    | LHFPL Tetraspan Subfamily Member 1                                         | 4.04   | 1.88  | 0.12  | 0.02  | -2.96 | 3.92E-02 | -2.11 | 1.90E-01 | -3.35 | 1.30E-01 | M-2 |
| ENSMMUG000000022286 |           |                                                                            | 1.33   | 0.55  | 1.09  | 0.95  | -3.17 | 4.80E-02 | 1.53  | 4.23E-01 | -1.88 | 4.97E-01 | M-2 |
| ENSMMUG000000023039 | PLAC1     | Placenta Specific 1                                                        | 2.63   | 0.07  | 0.21  | 0.18  | -6.52 | 6.96E-05 | 0.47  | 8.56E-01 | 1.71  | 6.45E-01 | M-2 |
| ENSMMUG00000018717  | ZNF75D    | Zinc Finger Protein 75D                                                    | 0.76   | 0.20  | 0.25  | 0.60  | -1.90 | 2.98E-02 | 0.94  | 3.41E-01 | 1.05  | 5.00E-01 | M-2 |
| ENSMMUG00000004633  | HMGB3     | High Mobility Group Box 3                                                  | 127.65 | 32.86 | 35.14 | 33.57 | -2.11 | 6.71E-04 | 0.05  | 9.60E-01 | 0.28  | 8.70E-01 | M-2 |
| ENSMMUG00000018704  | MECP2     | Methyl-CpG Binding Protein 2                                               | 11.07  | 4.07  | 5.07  | 2.87  | -1.76 | 2.77E-02 | 0.92  | 3.00E-01 | -1.02 | 4.50E-01 | M-2 |
| ENSMMUG000000040340 |           |                                                                            | 21.50  | 5.61  | 8.04  | 13.30 | -2.88 | 4.15E-02 | -0.19 | 9.30E-01 | 1.07  | 7.21E-01 | M-2 |
| ENSMMUG00000009013  | SLC10A3   | Solute Carrier Family 10 Member 3                                          | 4.47   | 1.48  | 1.94  | 1.82  | -2.87 | 2.49E-02 | -0.19 | 9.22E-01 | -0.06 | 9.91E-01 | M-2 |

|                      |          |                                                                    |        |       |       |       |       |          |       |          |       |          |     |
|----------------------|----------|--------------------------------------------------------------------|--------|-------|-------|-------|-------|----------|-------|----------|-------|----------|-----|
| ENSMMUG00000016708   |          |                                                                    | 10.09  | 1.96  | 1.07  | 1.24  | -2.88 | 2.09E-02 | -2.06 | 1.14E-01 | 0.95  | 7.23E-01 | M-2 |
| ENSMMUG00000001878   | MTMR7    | Myotubularin Related Protein 7                                     | 2.24   | 0.44  | 0.81  | 0.76  | -2.52 | 2.71E-02 | 0.97  | 4.65E-01 | -0.20 | 9.61E-01 | M-2 |
| ENSMMUG00000001153   | PDGFRL   | Platelet Derived Growth Factor Receptor Like                       | 21.00  | 2.83  | 0.45  | 0.19  | -4.60 | 1.48E-03 | -0.34 | 8.79E-01 | -3.61 | 1.03E-01 | M-2 |
| ENSMMUG000000020000  | ATP6V1B2 | ATPase H+ Transporting V1 Subunit B2                               | 29.94  | 9.41  | 17.87 | 41.86 | -1.71 | 2.26E-03 | 0.48  | 4.83E-01 | 1.19  | 1.41E-01 | M-2 |
| ENSMMUG000000014442  | PPP3CC   | Protein Phosphatase 3 Catalytic Subunit Gamma                      | 14.48  | 2.51  | 1.98  | 6.79  | -3.05 | 1.91E-03 | -0.09 | 9.56E-01 | 1.87  | 2.09E-01 | M-2 |
| ENSMMUG000000021994  | BIN3     | Bridging Integrator 3                                              | 17.68  | 5.13  | 2.86  | 2.07  | -1.79 | 3.40E-02 | -0.71 | 4.71E-01 | -0.95 | 5.22E-01 | M-2 |
| ENSMMUG000000010582  | CDCA2    | Cell Division Cycle Associated 2                                   | 23.03  | 5.57  | 17.68 | 11.30 | -1.78 | 6.26E-03 | 0.44  | 5.86E-01 | 0.42  | 7.85E-01 | M-2 |
| ENSMMUG000000021516  | CLU      | Clusterin                                                          | 8.51   | 0.84  | 0.13  | 0.15  | -5.60 | 1.01E-07 | -2.06 | 1.17E-01 | 1.74  | 4.23E-01 | M-2 |
| ENSMMUG000000016019  | PBK      | PDZ Binding Kinase                                                 | 4.51   | 1.38  | 4.08  | 4.48  | -2.07 | 2.44E-02 | 0.62  | 5.81E-01 | 1.72  | 2.00E-01 | M-2 |
| ENSMMUG00000007480   | ZNF395   | Zinc Finger Protein 395                                            | 2.54   | 0.37  | 0.80  | 1.05  | -2.63 | 9.57E-03 | 0.48  | 7.22E-01 | 0.90  | 6.68E-01 | M-2 |
| ENSMMUG000000013735  | DCTN6    | Dynactin Subunit 6                                                 | 116.65 | 65.95 | 42.93 | 24.30 | -1.37 | 4.70E-02 | -0.63 | 4.16E-01 | -0.48 | 7.49E-01 | M-2 |
| ENSMMUG000000039030  | GSR      | Glutathione-disulfide Reductase                                    | 10.09  | 1.39  | 1.08  | 2.77  | -3.85 | 8.16E-04 | -0.35 | 8.39E-01 | 1.91  | 3.15E-01 | M-2 |
| ENSMMUG000000006033  | ADAM9    | ADAM Metallopeptidase Domain 9                                     | 6.59   | 2.26  | 5.17  | 17.12 | -1.54 | 4.99E-02 | 0.76  | 3.84E-01 | 1.48  | 1.71E-01 | M-2 |
| ENSMMUG000000047028  | HGSNAT   | Heparan-alpha-glucosaminide N-acetyltransferase                    | 2.68   | 0.90  | 1.13  | 2.45  | -3.14 | 3.08E-03 | 2.12  | 5.61E-02 | -0.33 | 9.16E-01 | M-2 |
| ENSMMUG000000028999  | RNF170   | Ring Finger Protein 170                                            | 5.49   | 0.24  | 0.47  | 2.25  | -4.71 | 5.51E-04 | -0.09 | 9.69E-01 | 3.70  | 5.40E-02 | M-2 |
| ENSMMUG000000010971  | TOX      | Thymocyte Selection Associated High Mobility Group Box             | 6.73   | 2.63  | 0.42  | 0.24  | -3.28 | 1.15E-02 | -1.58 | 2.90E-01 | -2.13 | 3.09E-01 | M-2 |
| ENSMMUG000000017038  | RAB2A    | RAB2A, Member RAS Oncogene Family                                  | 31.47  | 4.83  | 15.68 | 21.35 | -2.49 | 1.70E-03 | 1.37  | 1.09E-01 | 0.39  | 8.52E-01 | M-2 |
| ENSMMUG000000028974  |          |                                                                    | 51.38  | 12.11 | 13.78 | 11.22 | -1.88 | 1.60E-02 | -0.38 | 7.13E-01 | 0.28  | 9.00E-01 | M-2 |
| ENSMMUG000000047761  |          |                                                                    | 11.37  | 2.93  | 2.24  | 2.26  | -2.14 | 6.22E-03 | -1.43 | 9.81E-02 | 0.62  | 7.39E-01 | M-2 |
| ENSMMUG000000023210  |          |                                                                    | 0.98   | 0.01  | 1.55  | 0.04  | -9.00 | 1.17E-02 | 0.73  | 8.93E-01 | -6.48 | 2.32E-01 | M-2 |
| ENSMMUG000000020725  | RIPK2    | Receptor Interacting Serine/threonine Kinase 2                     | 5.61   | 0.24  | 2.38  | 5.16  | -3.65 | 4.86E-03 | 1.98  | 1.60E-01 | 2.08  | 3.12E-01 | M-2 |
| ENSMMUG000000005356  | INTS8    | Integrator Complex Subunit 8                                       | 37.24  | 14.17 | 13.23 | 11.14 | -1.40 | 1.04E-02 | 0.28  | 7.02E-01 | -0.78 | 3.92E-01 | M-2 |
| ENSMMUG000000008808  | MTERF3   | Mitochondrial Transcription Termination Factor 3                   | 18.53  | 5.71  | 7.69  | 4.66  | -1.91 | 6.38E-03 | 0.13  | 8.99E-01 | 0.49  | 7.59E-01 | M-2 |
| ENSMMUG000000000963  | SDC2     | Syndecan 2                                                         | 7.54   | 2.70  | 0.51  | 0.08  | -3.64 | 4.50E-03 | -1.58 | 2.85E-01 | -3.00 | 1.01E-01 | M-2 |
| ENSMMUG000000017745  | ANGPT1   | Angiopoietin 1                                                     | 1.18   | 0.07  | 0.04  | 0.06  | -4.72 | 8.41E-03 | -3.01 | 1.36E-01 | 0.24  | 9.72E-01 | M-2 |
| ENSMMUG000000002788  | DSCC1    | DNA Replication And Sister Chromatid Cohesion 1                    | 10.33  | 3.43  | 2.98  | 3.87  | -2.03 | 3.72E-02 | -0.91 | 4.19E-01 | 0.87  | 6.51E-01 | M-2 |
| ENSMMUG000000010200  | NDRG1    | N-myc Downstream Regulated 1                                       | 13.43  | 5.62  | 14.13 | 17.03 | -1.62 | 2.62E-02 | 1.11  | 1.44E-01 | 1.50  | 1.32E-01 | M-2 |
| ENSMMUG000000044895  |          |                                                                    | 6.72   | 0.25  | 0.11  | 0.00  | -5.88 | 6.27E-04 | -2.32 | 2.99E-01 | -0.32 | 9.67E-01 | M-2 |
| ENSMMUG000000022248  | KHDRBS3  | KH RNA Binding Domain Containing, Signal Transduction Associated 3 | 16.28  | 5.09  | 3.53  | 5.13  | -1.92 | 3.59E-02 | -0.80 | 4.48E-01 | 0.51  | 8.11E-01 | M-2 |
| ENSMMUG000000020326  | FAM135B  | Family With Sequence Similarity 135 Member B                       | 0.98   | 0.12  | 0.03  | 0.03  | -5.19 | 3.98E-03 | -2.57 | 2.30E-01 | 0.03  | 9.97E-01 | M-2 |
| ENSMMUG0000000038016 |          |                                                                    | 4.95   | 0.03  | 0.04  | 0.04  | -6.96 | 8.55E-03 | 0.29  | 9.46E-01 | 1.48  | 8.28E-01 | M-2 |
| ENSMMUG000000010992  | DCP1B    | Decapping MRNA 1B                                                  | 15.61  | 5.69  | 4.07  | 5.41  | -3.01 | 2.85E-05 | 0.81  | 3.60E-01 | -0.97 | 4.71E-01 | M-2 |
| ENSMMUG000000009251  | TSPAN9   | Tetraspanin 9                                                      | 3.19   | 0.81  | 0.57  | 1.31  | -2.18 | 2.78E-02 | -0.63 | 6.04E-01 | 1.48  | 3.42E-01 | M-2 |
| ENSMMUG000000015253  | NECAP1   | NECAP Endocytosis Associated 1                                     | 5.79   | 3.30  | 5.27  | 8.59  | -3.51 | 8.15E-03 | 1.60  | 2.84E-01 | 3.04  | 9.05E-02 | M-2 |
| ENSMMUG000000020370  | SOX5     | SRY-box 5                                                          | 1.79   | 0.36  | 0.09  | 0.04  | -2.84 | 3.74E-02 | -1.68 | 2.63E-01 | -0.86 | 7.91E-01 | M-2 |
| ENSMMUG000000001359  | CAPRIN2  | Caprin Family Member 2                                             | 54.90  | 10.38 | 10.01 | 5.25  | -3.35 | 8.57E-06 | 1.05  | 2.42E-01 | -1.26 | 3.24E-01 | M-2 |
| ENSMMUG000000000205  | TMEM117  | Transmembrane Protein 117                                          | 0.44   | 0.06  | 0.36  | 1.02  | -4.00 | 9.03E-03 | 2.43  | 1.36E-01 | 3.15  | 1.35E-01 | M-2 |
| ENSMMUG000000011441  | TMEM106C | Transmembrane Protein 106C                                         | 2.13   | 0.75  | 0.44  | 2.02  | -2.93 | 4.53E-03 | 0.33  | 8.28E-01 | 1.04  | 6.17E-01 | M-2 |
| ENSMMUG000000037566  | HIGD1C   | HIG1 Hypoxia Inducible Domain Family Member 1C                     | 6.23   | 0.01  | 0.19  | 0.01  | -8.41 | 1.90E-02 | 3.07  | 4.76E-01 | -1.22 | 9.05E-01 | M-2 |
| ENSMMUG000000012457  | CSRNP2   | Cysteine And Serine Rich Nuclear Protein 2                         | 16.24  | 6.02  | 11.34 | 2.82  | -2.31 | 1.69E-02 | 0.74  | 5.28E-01 | -2.21 | 8.65E-02 | M-2 |

|                    |              |                                                               |        |        |        |        |       |          |       |          |       |          |     |
|--------------------|--------------|---------------------------------------------------------------|--------|--------|--------|--------|-------|----------|-------|----------|-------|----------|-----|
| ENSMMUG0000000108  | NCKAP1L      | NCK Associated Protein 1 Like                                 | 1.12   | 0.09   | 0.28   | 0.03   | -5.26 | 3.41E-03 | 0.15  | 9.59E-01 | -1.40 | 7.43E-01 | M-2 |
| ENSMMUG0000000113  | PPP1R1A      | Protein Phosphatase 1 Regulatory Inhibitor Subunit 1A         | 1.30   | 0.01   | 1.25   | 1.14   | -6.60 | 4.97E-04 | 1.75  | 4.70E-01 | 3.87  | 1.54E-01 | M-2 |
| ENSMMUG00000046185 | LOC107000903 | Uncharacterized LOC107000903                                  | 7.54   | 0.01   | 0.09   | 1.15   | -8.30 | 4.96E-07 | 0.74  | 7.89E-01 | 3.67  | 1.48E-01 | M-2 |
| ENSMMUG00000011952 | PPM1H        | Protein Phosphatase, Mg2+/Mn2+ Dependent 1H                   | 1.29   | 0.12   | 0.10   | 0.32   | -4.24 | 3.14E-04 | 0.52  | 7.60E-01 | 0.77  | 7.99E-01 | M-2 |
| ENSMMUG00000018725 | MDM1         | Mdm1 Nuclear Protein                                          | 6.54   | 0.70   | 0.72   | 0.36   | -3.22 | 1.66E-04 | -1.62 | 8.96E-02 | 0.80  | 6.81E-01 | M-2 |
| ENSMMUG00000044066 |              |                                                               | 0.78   | 0.02   | 3.92   | 0.28   | -9.03 | 1.22E-02 | 6.65  | 7.63E-02 | -4.28 | 5.04E-01 | M-2 |
| ENSMMUG00000018257 |              |                                                               | 53.42  | 6.34   | 8.49   | 1.94   | -2.87 | 1.03E-02 | -1.78 | 1.38E-01 | -0.42 | 8.94E-01 | M-2 |
| ENSMMUG00000019214 | PPP1R12A     | Protein Phosphatase 1 Regulatory Subunit 12A                  | 38.37  | 15.98  | 15.41  | 16.16  | -1.25 | 4.09E-02 | 0.15  | 8.59E-01 | -0.13 | 9.50E-01 | M-2 |
| ENSMMUG00000011305 | TMTC2        | Transmembrane And Tetratricopeptide Repeat Containing 2       | 7.10   | 0.96   | 3.29   | 1.12   | -2.92 | 2.43E-03 | -1.83 | 7.78E-02 | 1.35  | 4.23E-01 | M-2 |
| ENSMMUG00000003574 | POC1B        | POC1 Centriolar Protein B                                     | 2.16   | 0.45   | 0.95   | 3.00   | -3.11 | 8.19E-03 | 1.02  | 4.70E-01 | 1.13  | 6.30E-01 | M-2 |
| ENSMMUG00000002243 | PLEKHG7      | Pleckstrin Homology And RhoGEF Domain Containing G7           | 0.78   | 0.26   | 0.35   | 0.52   | -4.12 | 1.94E-02 | -0.85 | 7.29E-01 | 0.78  | 8.67E-01 | M-2 |
| ENSMMUG00000040483 |              |                                                               | 15.20  | 2.41   | 2.37   | 3.68   | -4.38 | 4.21E-03 | 0.15  | 9.52E-01 | 0.07  | 9.92E-01 | M-2 |
| ENSMMUG00000018242 | TMCC3        | Transmembrane And Coiled-coil Domain Family 3                 | 6.68   | 0.87   | 0.80   | 1.17   | -4.04 | 3.49E-04 | 0.22  | 9.03E-01 | -0.94 | 7.21E-01 | M-2 |
| ENSMMUG00000039228 |              |                                                               | 8.99   | 3.41   | 8.78   | 10.98  | -2.63 | 4.24E-02 | 1.36  | 3.48E-01 | 1.09  | 6.79E-01 | M-2 |
| ENSMMUG00000005504 | NUP37        | Nucleoporin 37                                                | 27.39  | 7.91   | 9.23   | 7.97   | -1.65 | 4.26E-02 | 0.04  | 9.72E-01 | 0.61  | 7.25E-01 | M-2 |
| ENSMMUG00000040571 |              |                                                               | 220.30 | 95.28  | 414.36 | 568.50 | -2.11 | 4.21E-02 | 2.01  | 5.15E-02 | 0.52  | 8.35E-01 | M-2 |
| ENSMMUG00000015540 |              |                                                               | 1.31   | 0.07   | 0.14   | 0.04   | -3.30 | 1.79E-02 | -2.14 | 1.88E-01 | 0.10  | 9.86E-01 | M-2 |
| ENSMMUG00000015108 | SVOP         | SV2 Related Protein                                           | 2.53   | 0.10   | 0.10   | 0.02   | -5.84 | 2.04E-03 | -1.09 | 6.82E-01 | -1.78 | 6.70E-01 | M-2 |
| ENSMMUG00000039553 | ALKBH2       | AlkB Homolog 2, Alpha-ketoglutarate Dependent Dioxygenase     | 22.60  | 4.23   | 2.63   | 2.05   | -2.35 | 8.53E-03 | -1.21 | 2.19E-01 | 0.16  | 9.62E-01 | M-2 |
| ENSMMUG00000019650 | UBE3B        | Ubiquitin Protein Ligase E3B                                  | 41.35  | 17.79  | 9.04   | 7.97   | -2.05 | 5.54E-04 | -0.23 | 7.88E-01 | -1.19 | 1.85E-01 | M-2 |
| ENSMMUG00000007678 | ANKRD13A     | Ankyrin Repeat Domain 13A                                     | 8.38   | 2.02   | 2.17   | 6.64   | -2.15 | 8.55E-03 | -0.42 | 6.96E-01 | 1.85  | 9.97E-02 | M-2 |
| ENSMMUG00000001739 | ATP2A2       | ATPase Sarcoplasmic/endoplasmic Reticulum Ca2+ Transporting 2 | 245.64 | 105.80 | 62.77  | 47.07  | -1.53 | 1.16E-03 | -0.29 | 6.38E-01 | -0.87 | 2.28E-01 | M-2 |
| ENSMMUG00000002226 | ATXN2        | Ataxin 2                                                      | 112.84 | 47.82  | 32.90  | 42.26  | -1.38 | 3.98E-03 | -0.34 | 5.67E-01 | 0.28  | 8.11E-01 | M-2 |
| ENSMMUG00000005099 | TAOK3        | TAO Kinase 3                                                  | 30.34  | 9.68   | 5.61   | 9.31   | -1.62 | 1.13E-02 | -1.17 | 7.90E-02 | 0.96  | 3.50E-01 | M-2 |
| ENSMMUG00000012650 | BCL7A        | BCL Tumor Suppressor 7A                                       | 1.97   | 0.50   | 0.84   | 3.72   | -3.04 | 3.07E-02 | 0.19  | 9.28E-01 | 2.58  | 2.00E-01 | M-2 |
| ENSMMUG00000021928 | CLIP1        | CAP-Gly Domain Containing Linker Protein 1                    | 64.96  | 21.92  | 13.87  | 22.62  | -2.10 | 2.61E-06 | -0.07 | 9.22E-01 | -0.06 | 9.70E-01 | M-2 |
| ENSMMUG00000012569 | TMEM132D     | Transmembrane Protein 132D                                    | 5.98   | 0.28   | 0.14   | 0.05   | -5.00 | 2.24E-05 | -0.77 | 6.43E-01 | -1.31 | 6.37E-01 | M-2 |
| ENSMMUG00000017174 | SUV39H2      | Suppressor Of Variegation 3-9 Homolog 2                       | 28.86  | 9.09   | 6.46   | 3.04   | -1.41 | 1.89E-02 | -1.09 | 7.78E-02 | -0.50 | 6.92E-01 | M-2 |
| ENSMMUG00000015370 | PLXDC2       | Plexin Domain Containing 2                                    | 1.38   | 0.31   | 0.12   | 0.16   | -4.17 | 3.64E-02 | 0.37  | 8.99E-01 | 2.97  | 3.71E-01 | M-2 |
| ENSMMUG00000042571 |              |                                                               | 4.16   | 2.96   | 0.25   | 0.30   | -2.59 | 9.98E-03 | -1.79 | 9.29E-02 | -0.51 | 8.44E-01 | M-2 |
| ENSMMUG00000010589 | NEBL         | Nebulette                                                     | 1.35   | 1.26   | 0.11   | 0.15   | -3.24 | 3.95E-02 | 0.12  | 9.62E-01 | -1.76 | 5.30E-01 | M-2 |
| ENSMMUG00000005078 | ABI1         | Abl Interactor 1                                              | 63.69  | 27.11  | 28.12  | 26.53  | -1.65 | 1.89E-03 | -0.12 | 8.77E-01 | 0.54  | 6.13E-01 | M-2 |
| ENSMMUG00000016403 | ANKRD26      | Ankyrin Repeat Domain 26                                      | 12.19  | 6.38   | 7.53   | 6.59   | -1.13 | 3.00E-02 | 0.58  | 3.15E-01 | -0.69 | 4.23E-01 | M-2 |
| ENSMMUG00000004778 | ARHGAP12     | Rho GTPase Activating Protein 12                              | 21.97  | 8.48   | 7.88   | 8.05   | -1.63 | 8.54E-03 | 0.21  | 8.11E-01 | 0.43  | 7.61E-01 | M-2 |
| ENSMMUG00000012451 | EPC1         | Enhancer Of Polycomb Homolog 1                                | 36.25  | 5.36   | 4.88   | 5.62   | -2.81 | 1.87E-06 | 0.08  | 9.37E-01 | 0.04  | 9.86E-01 | M-2 |
| ENSMMUG00000006713 | CCNY         | Cyclin Y                                                      | 31.58  | 6.25   | 8.90   | 8.87   | -2.19 | 2.33E-03 | -0.49 | 5.92E-01 | 1.29  | 2.44E-01 | M-2 |
| ENSMMUG00000015406 | RASGEF1A     | RasGEF Domain Family Member 1A                                | 2.91   | 1.34   | 0.25   | 0.21   | -2.82 | 3.54E-02 | -0.57 | 7.48E-01 | -1.81 | 4.25E-01 | M-2 |



|                     |           |                                                                 |        |       |       |       |       |          |       |          |       |          |     |
|---------------------|-----------|-----------------------------------------------------------------|--------|-------|-------|-------|-------|----------|-------|----------|-------|----------|-----|
| ENSMMUG00000013437  | MARCH8    | Membrane Associated Ring-CH-type Finger 8                       | 8.24   | 2.60  | 0.95  | 1.67  | -2.14 | 1.89E-02 | -0.85 | 4.21E-01 | -0.21 | 9.46E-01 | M-2 |
| ENSMMUG00000041169  |           |                                                                 | 7.64   | 2.72  | 2.56  | 2.64  | -2.36 | 7.34E-03 | 0.93  | 3.64E-01 | -1.11 | 4.77E-01 | M-2 |
| ENSMMUG00000003189  | PIIF      | Peptidylprolyl Isomerase F                                      | 16.07  | 2.09  | 5.90  | 7.48  | -3.52 | 4.05E-04 | 0.90  | 4.71E-01 | 1.21  | 5.21E-01 | M-2 |
| ENSMMUG00000009128  | DLG5      | Discs Large MAGUK Scaffold Protein 5                            | 29.78  | 11.56 | 8.06  | 7.67  | -1.68 | 3.23E-02 | -1.01 | 2.32E-01 | -0.07 | 9.78E-01 | M-2 |
| ENSMMUG00000013695  | FUT11     | Fucosyltransferase 11                                           | 3.85   | 0.47  | 0.22  | 0.55  | -3.82 | 9.57E-04 | -1.35 | 3.36E-01 | 1.39  | 5.49E-01 | M-2 |
| ENSMMUG00000015714  | PPP3CB    | Protein Phosphatase 3 Catalytic Subunit Beta                    | 15.43  | 5.99  | 11.61 | 7.64  | -1.43 | 2.10E-02 | 1.03  | 1.09E-01 | -0.19 | 9.12E-01 | M-2 |
| ENSMMUG00000011282  | DNAJC9    | DnaJ Heat Shock Protein Family (Hsp40) Member C9                | 35.61  | 13.92 | 10.96 | 8.60  | -1.17 | 1.03E-02 | -0.28 | 6.29E-01 | -0.55 | 4.98E-01 | M-2 |
| ENSMMUG00000002541  |           |                                                                 | 23.67  | 6.31  | 17.22 | 13.12 | -1.96 | 1.28E-02 | 1.02  | 2.43E-01 | 0.30  | 8.92E-01 | M-2 |
| ENSMMUG00000045565  | DDIT4     | DNA Damage Inducible Transcript 4                               | 9.03   | 1.37  | 4.94  | 4.65  | -3.39 | 1.66E-03 | 1.98  | 8.72E-02 | -2.06 | 2.06E-01 | M-2 |
| ENSMMUG00000006392  | AIFM2     | Apoptosis Inducing Factor, Mitochondria Associated 2            | 8.64   | 1.33  | 0.86  | 3.11  | -3.91 | 2.91E-03 | -1.59 | 2.99E-01 | 1.71  | 4.64E-01 | M-2 |
| ENSMMUG00000008985  | KIF1BP    | KIF1 Binding Protein                                            | 64.52  | 9.77  | 15.58 | 23.63 | -2.88 | 2.97E-08 | 0.65  | 3.10E-01 | 0.73  | 4.56E-01 | M-2 |
| ENSMMUG000000030530 |           |                                                                 | 1.44   | 0.49  | 1.06  | 0.86  | -2.91 | 3.19E-02 | 1.11  | 4.99E-01 | 0.39  | 9.26E-01 | M-2 |
| ENSMMUG000000030528 | ADO       | 2-aminoethanethiol Dioxigenase                                  | 2.33   | 0.48  | 2.12  | 1.72  | -5.26 | 5.58E-04 | 1.69  | 3.73E-01 | 2.40  | 4.05E-01 | M-2 |
| ENSMMUG00000047356  | LIPA      | Lipase A, Lysosomal Acid Type                                   | 7.47   | 1.54  | 0.60  | 0.18  | -3.08 | 6.00E-03 | -0.58 | 7.00E-01 | -1.53 | 4.31E-01 | M-2 |
| ENSMMUG00000000454  | PDLIM1    | PDZ And LIM Domain 1                                            | 110.78 | 37.47 | 21.25 | 16.42 | -1.51 | 4.02E-02 | -0.94 | 2.34E-01 | -0.18 | 9.37E-01 | M-2 |
| ENSMMUG00000047189  | ARHGAP19  | Rho GTPase Activating Protein 19                                | 10.63  | 4.25  | 5.31  | 5.86  | -1.78 | 4.42E-03 | 0.56  | 4.52E-01 | 0.73  | 5.28E-01 | M-2 |
| ENSMMUG00000020605  | HPSE2     | Heparanase 2 (inactive)                                         | 4.50   | 0.83  | 0.12  | 0.04  | -3.46 | 3.51E-02 | -2.81 | 1.08E-01 | -1.33 | 7.32E-01 | M-2 |
| ENSMMUG000000023761 | ENTPD7    | Ectonucleoside Triphosphate Diphosphohydrolase 7                | 11.06  | 1.72  | 1.17  | 1.77  | -2.90 | 1.58E-02 | -0.64 | 6.85E-01 | 0.64  | 8.28E-01 | M-2 |
| ENSMMUG00000013418  | SLF2      | SMC5-SMC6 Complex Localization Factor 2                         | 17.88  | 7.72  | 9.30  | 5.63  | -1.43 | 5.88E-03 | -0.04 | 9.59E-01 | -0.71 | 4.30E-01 | M-2 |
| ENSMMUG00000010674  | LZTS2     | Leucine Zipper Tumor Suppressor 2                               | 2.43   | 1.17  | 0.31  | 1.27  | -2.10 | 4.00E-02 | -0.90 | 4.53E-01 | -0.86 | 6.85E-01 | M-2 |
| ENSMMUG00000020080  | GFRA1     | GDNF Family Receptor Alpha 1                                    | 10.03  | 1.52  | 0.76  | 0.15  | -3.10 | 3.86E-02 | -2.21 | 1.68E-01 | -0.36 | 9.43E-01 | M-2 |
| ENSMMUG00000043312  |           |                                                                 | 11.11  | 11.25 | 8.35  | 0.06  | -5.61 | 5.89E-03 | 0.17  | 9.62E-01 | -3.68 | 2.92E-01 | M-2 |
| ENSMMUG00000048654  | NANOS1    | Nanos C2HC-type Zinc Finger 1                                   | 46.85  | 10.03 | 6.84  | 2.12  | -3.18 | 6.26E-04 | -0.54 | 6.63E-01 | -0.56 | 8.11E-01 | M-2 |
| ENSMMUG00000006341  | SYCE1     | Synaptonemal Complex Central Element Protein 1                  | 5.60   | 1.19  | 2.74  | 2.00  | -4.27 | 2.52E-05 | 1.06  | 4.03E-01 | 2.68  | 6.91E-02 | M-2 |
| ENSMMUG00000007513  | SLC25A22  | Solute Carrier Family 25 Member 22                              | 1.66   | 0.39  | 0.56  | 1.35  | -3.35 | 3.02E-02 | -0.37 | 8.69E-01 | 2.32  | 3.39E-01 | M-2 |
| ENSMMUG00000003104  | TOLLIP    | Toll Interacting Protein                                        | 1.91   | 0.48  | 0.53  | 0.77  | -3.75 | 1.38E-03 | 0.45  | 7.92E-01 | -0.57 | 8.53E-01 | M-2 |
| ENSMMUG00000002043  | CD81      | CD81 Molecule                                                   | 1.91   | 1.42  | 0.65  | 1.51  | -3.92 | 2.97E-02 | 1.90  | 3.47E-01 | 3.56  | 1.62E-01 | M-2 |
| ENSMMUG00000005019  | LOC721299 | Actin-85C-like                                                  | 2.63   | 0.13  | 0.03  | 0.03  | -4.88 | 2.17E-02 | -1.16 | 6.93E-01 | -2.56 | 5.40E-01 | M-2 |
| ENSMMUG00000005493  | TMEM134   | Transmembrane Protein 134                                       | 3.56   | 0.58  | 1.34  | 3.99  | -4.51 | 1.37E-03 | 2.47  | 1.05E-01 | 1.77  | 4.79E-01 | M-2 |
| ENSMMUG00000020727  |           |                                                                 | 0.23   | 0.11  | 0.58  | 1.39  | -5.92 | 2.33E-02 | 4.30  | 1.16E-01 | 5.13  | 1.76E-01 | M-2 |
| ENSMMUG00000001403  | YIF1A     | Yip1 Interacting Factor Homolog A, Membrane Trafficking Protein | 1.91   | 0.29  | 1.28  | 1.47  | -3.93 | 1.52E-03 | 2.06  | 1.22E-01 | 3.09  | 6.56E-02 | M-2 |
| ENSMMUG000000030597 | MAP4K2    | Mitogen-activated Protein Kinase Kinase Kinase 2                | 1.31   | 0.28  | 0.68  | 0.62  | -4.10 | 1.61E-03 | 2.21  | 1.21E-01 | -1.49 | 5.47E-01 | M-2 |
| ENSMMUG00000012948  | PLCB3     | Phospholipase C Beta 3                                          | 3.61   | 2.45  | 1.75  | 5.32  | -2.95 | 2.86E-02 | 0.44  | 8.11E-01 | 0.23  | 9.63E-01 | M-2 |
| ENSMMUG00000018304  | LGALS12   | Galectin 12                                                     | 1.25   | 0.23  | 0.09  | 0.01  | -4.07 | 3.58E-03 | -0.67 | 7.37E-01 | -3.67 | 8.58E-02 | M-2 |
| ENSMMUG00000018112  | EML3      | Echinoderm Microtubule Associated Protein Like 3                | 0.55   | 0.15  | 0.74  | 5.57  | -4.39 | 4.34E-03 | 2.37  | 1.63E-01 | 2.31  | 3.61E-01 | M-2 |
| ENSMMUG00000044417  | CD6       | CD6 Molecule                                                    | 3.04   | 2.02  | 1.23  | 0.36  | -3.88 | 3.40E-02 | -2.27 | 2.74E-01 | -2.82 | 3.26E-01 | M-2 |
| ENSMMUG00000014116  | OR5A2     | Olfactory Receptor, Family 5, Subfamily A, Member 2             | 4.74   | 0.22  | 1.40  | 0.03  | -5.85 | 5.25E-03 | 0.19  | 9.56E-01 | -2.23 | 6.22E-01 | M-2 |
| ENSMMUG00000015598  | NR1H3     | Nuclear Receptor Subfamily 1 Group H Member 3                   | 3.70   | 0.23  | 0.13  | 0.01  | -3.81 | 1.03E-02 | -0.59 | 7.86E-01 | -4.05 | 7.66E-02 | M-2 |
| ENSMMUG00000019268  | CD82      | CD82 Molecule                                                   | 7.05   | 1.13  | 0.23  | 0.01  | -3.81 | 2.48E-03 | -1.71 | 2.45E-01 | -3.48 | 6.96E-02 | M-2 |

|                     |             |                                                                       |       |       |       |       |        |          |       |          |       |          |     |
|---------------------|-------------|-----------------------------------------------------------------------|-------|-------|-------|-------|--------|----------|-------|----------|-------|----------|-----|
| ENSMMUG00000004329  | SLC1A2      | Solute Carrier Family 1 Member 2                                      | 2.36  | 0.47  | 0.15  | 0.00  | -4.33  | 2.92E-02 | -1.42 | 5.74E-01 | -3.62 | 2.69E-01 | M-2 |
| ENSMMUG00000006063  | FBXO3       | F-box Protein 3                                                       | 3.46  | 0.54  | 0.54  | 1.11  | -2.55  | 1.85E-02 | -1.04 | 4.06E-01 | 1.92  | 2.33E-01 | M-2 |
| ENSMMUG00000002535  | DEPDC7      | DEP Domain Containing 7                                               | 46.34 | 5.72  | 3.92  | 1.08  | -3.19  | 2.79E-05 | -0.97 | 2.90E-01 | -1.65 | 1.56E-01 | M-2 |
| ENSMMUG000000017590 | ARL14EP     | ADP Ribosylation Factor Like GTPase 14 Effector Protein               | 58.79 | 19.74 | 15.13 | 10.15 | -1.74  | 1.40E-02 | -0.03 | 9.81E-01 | -0.85 | 4.99E-01 | M-2 |
| ENSMMUG000000041731 | TMEM86A     | Transmembrane Protein 86A                                             | 5.06  | 0.84  | 2.18  | 7.02  | -2.75  | 2.86E-02 | 1.56  | 2.53E-01 | 1.84  | 3.52E-01 | M-2 |
| ENSMMUG00000006405  | SERGEF      | Secretion Regulating Guanine Nucleotide Exchange Factor               | 0.21  | 0.33  | 0.37  | 0.95  | -3.93  | 2.67E-02 | 2.86  | 1.24E-01 | 2.43  | 4.03E-01 | M-2 |
| ENSMMUG00000000360  |             |                                                                       | 3.91  | 0.37  | 0.10  | 0.09  | -4.76  | 4.39E-03 | -0.83 | 7.34E-01 | -0.83 | 8.64E-01 | M-2 |
| ENSMMUG00000009690  | ARNTL       | Aryl Hydrocarbon Receptor Nuclear Translocator Like                   | 1.21  | 0.48  | 2.11  | 1.02  | -2.66  | 4.27E-02 | 2.47  | 5.97E-02 | -1.51 | 5.08E-01 | M-2 |
| ENSMMUG000000022860 | USP47       | Ubiquitin Specific Peptidase 47                                       | 11.87 | 5.96  | 8.50  | 9.32  | -1.07  | 3.27E-02 | 0.30  | 6.24E-01 | 0.04  | 9.84E-01 | M-2 |
| ENSMMUG00000009204  | SWAP70      | Switching B-cell Complex Subunit SWAP70                               | 23.74 | 9.68  | 12.39 | 8.69  | -1.82  | 5.07E-03 | 0.32  | 7.17E-01 | -0.17 | 9.36E-01 | M-2 |
| ENSMMUG00000008758  | ZNF143      | Zinc Finger Protein 143                                               | 18.74 | 8.97  | 5.89  | 2.31  | -1.14  | 3.65E-02 | -0.82 | 1.47E-01 | -0.79 | 3.60E-01 | M-2 |
| ENSMMUG000000015017 | LMO1        | LIM Domain Only 1                                                     | 10.57 | 0.60  | 0.25  | 0.02  | -5.14  | 3.42E-03 | -1.32 | 5.65E-01 | -3.39 | 2.56E-01 | M-2 |
| ENSMMUG000000016882 | FAM160A2    | Family With Sequence Similarity 160 Member A2                         | 10.35 | 2.78  | 1.32  | 2.56  | -2.24  | 1.78E-02 | -0.86 | 4.33E-01 | 0.32  | 9.03E-01 | M-2 |
| ENSMMUG000000039301 | STARD10     | StAR Related Lipid Transfer Domain Containing 10                      | 0.99  | 0.26  | 0.70  | 1.43  | -2.43  | 4.34E-02 | 0.50  | 7.53E-01 | 1.36  | 5.18E-01 | M-2 |
| ENSMMUG00000007676  |             |                                                                       | 1.63  | 0.04  | 0.04  | 0.08  | -6.39  | 5.21E-10 | 1.02  | 4.90E-01 | -0.04 | 9.93E-01 | M-2 |
| ENSMMUG00000000185  | DGAT2       | Diacylglycerol O-acyltransferase 2                                    | 1.92  | 0.05  | 2.36  | 0.52  | -5.50  | 6.27E-05 | 2.79  | 7.36E-02 | -2.47 | 2.59E-01 | M-2 |
| ENSMMUG000000017476 | USP35       | Ubiquitin Specific Peptidase 35                                       | 18.07 | 6.28  | 0.69  | 0.66  | -3.22  | 1.83E-03 | -2.11 | 5.57E-02 | -1.99 | 2.11E-01 | M-2 |
| ENSMMUG000000013055 | ME3         | Malic Enzyme 3                                                        | 1.66  | 0.23  | 0.05  | 0.00  | -3.78  | 2.05E-02 | -1.96 | 3.07E-01 | -2.17 | 4.97E-01 | M-2 |
| ENSMMUG000000037865 | ANKRD49     | Ankyrin Repeat Domain 49                                              | 8.42  | 2.45  | 2.61  | 1.33  | -2.11  | 2.98E-02 | -0.16 | 9.10E-01 | 0.35  | 8.98E-01 | M-2 |
| ENSMMUG000000047254 |             |                                                                       | 9.15  | 1.27  | 0.09  | 0.06  | -3.93  | 1.40E-02 | -3.00 | 1.02E-01 | -1.15 | 7.91E-01 | M-2 |
| ENSMMUG000000013419 |             |                                                                       | 1.91  | 1.32  | 0.57  | 0.09  | -3.23  | 4.20E-02 | -1.21 | 5.44E-01 | -2.94 | 2.56E-01 | M-2 |
| ENSMMUG000000045132 |             |                                                                       | 12.55 | 0.29  | 0.07  | 0.18  | -5.39  | 1.90E-02 | -3.28 | 2.24E-01 | 2.55  | 5.83E-01 | M-2 |
| ENSMMUG00000005445  | C14H11orf53 | Chromosome 14 Open Reading Frame, Human C11orf53                      | 1.60  | 0.02  | 0.39  | 0.00  | -6.41  | 2.95E-03 | -0.08 | 9.84E-01 | 0.48  | 9.54E-01 | M-2 |
| ENSMMUG000000022133 | CRYAB       | Crystallin Alpha B                                                    | 1.69  | 0.02  | 0.12  | 0.06  | -6.59  | 1.51E-02 | 2.69  | 4.03E-01 | -0.09 | 9.94E-01 | M-2 |
| ENSMMUG00000005492  | TMEM25      | Transmembrane Protein 25                                              | 1.40  | 0.66  | 0.70  | 1.52  | -3.60  | 3.25E-02 | 0.81  | 7.14E-01 | 2.53  | 3.33E-01 | M-2 |
| ENSMMUG00000004764  | MCAM        | Melanoma Cell Adhesion Molecule                                       | 2.80  | 1.33  | 2.37  | 0.48  | -4.96  | 8.20E-04 | 0.36  | 8.74E-01 | -2.45 | 3.19E-01 | M-2 |
| ENSMMUG000000010009 | EI24        | EI24, Autophagy Associated Transmembrane Protein                      | 51.69 | 19.42 | 26.88 | 28.01 | -1.54  | 1.21E-02 | 0.62  | 3.85E-01 | 0.16  | 9.32E-01 | M-2 |
| ENSMMUG00000007950  | DCPS        | Decapping Enzyme, Scavenger                                           | 5.08  | 1.73  | 2.35  | 2.34  | -1.98  | 2.28E-02 | 0.57  | 5.93E-01 | -0.56 | 7.80E-01 | M-2 |
| ENSMMUG000000003144 | KCNJ1       | Potassium Voltage-gated Channel Subfamily J Member 1                  | 1.85  | 0.18  | 0.01  | 0.17  | -5.52  | 3.88E-03 | -3.02 | 1.90E-01 | 3.27  | 3.19E-01 | M-2 |
| ENSMMUG000000043454 |             |                                                                       | 0.86  | 0.00  | 0.43  | 0.51  | -15.30 | 2.70E-02 | 10.91 | 1.31E-01 | 1.61  | 9.44E-01 | M-2 |
| ENSMMUG000000046625 | VPS26B      | VPS26, Retromer Complex Component B                                   | 22.92 | 5.45  | 8.73  | 6.19  | -2.79  | 2.69E-03 | 1.15  | 2.78E-01 | -1.26 | 4.40E-01 | M-2 |
| ENSMMUG000000007107 |             |                                                                       | 2.93  | 1.83  | 0.88  | 1.66  | -3.61  | 3.35E-02 | -0.74 | 7.40E-01 | 4.13  | 5.45E-02 | M-2 |
| ENSMMUG000000046774 | RALB        | RAS Like Proto-oncogene B                                             | 8.75  | 1.85  | 1.21  | 0.71  | -2.76  | 2.44E-02 | -1.50 | 2.64E-01 | -0.46 | 8.92E-01 | M-2 |
| ENSMMUG000000006354 | INSIG2      | Insulin Induced Gene 2                                                | 12.64 | 1.52  | 2.33  | 1.83  | -2.77  | 2.40E-03 | -1.29 | 2.11E-01 | 0.98  | 5.89E-01 | M-2 |
| ENSMMUG000000017081 |             |                                                                       | 3.13  | 0.22  | 0.10  | 0.02  | -5.08  | 2.40E-04 | -2.09 | 2.29E-01 | -1.39 | 6.79E-01 | M-2 |
| ENSMMUG00000009475  | LYPD6B      | LY6/PLAUR Domain Containing 6B                                        | 9.65  | 1.98  | 5.74  | 0.54  | -3.41  | 2.10E-02 | 1.26  | 4.67E-01 | -2.04 | 4.08E-01 | M-2 |
| ENSMMUG000000003707 | ACVR1C      | Activin A Receptor Type 1C                                            | 6.88  | 0.33  | 0.15  | 0.05  | -6.23  | 1.18E-05 | 2.13  | 2.28E-01 | -2.51 | 3.67E-01 | M-2 |
| ENSMMUG000000018497 | ACVR1       | Activin A Receptor Type 1                                             | 11.33 | 1.90  | 2.60  | 4.87  | -2.57  | 4.02E-02 | -0.47 | 7.80E-01 | 0.96  | 7.13E-01 | M-2 |
| ENSMMUG000000006180 | TANC1       | Tetratricopeptide Repeat, Ankyrin Repeat And Coiled-coil Containing 1 | 15.04 | 6.16  | 2.28  | 2.36  | -1.82  | 2.92E-02 | -0.73 | 4.48E-01 | -1.29 | 3.19E-01 | M-2 |
| ENSMMUG000000006182 | BAZ2B       | Bromodomain Adjacent To Zinc Finger Domain 2B                         | 2.61  | 1.09  | 0.56  | 1.00  | -2.02  | 4.08E-02 | -1.08 | 3.25E-01 | 0.59  | 7.97E-01 | M-2 |

|                     |            |                                                     |       |       |       |       |       |          |       |          |       |          |     |
|---------------------|------------|-----------------------------------------------------|-------|-------|-------|-------|-------|----------|-------|----------|-------|----------|-----|
| ENSMMUG00000019590  | GCA        | Grancalcin                                          | 1.68  | 0.10  | 0.94  | 0.14  | -3.06 | 3.80E-02 | 1.90  | 2.32E-01 | -1.42 | 6.14E-01 | M-2 |
| ENSMMUG00000031393  | ERICH2     | Glutamate Rich 2                                    | 4.21  | 0.98  | 3.21  | 2.00  | -2.99 | 4.14E-02 | 2.51  | 9.20E-02 | -2.13 | 3.60E-01 | M-2 |
| ENSMMUG00000015198  | GAD1       | Glutamate Decarboxylase 1                           | 1.48  | 0.56  | 0.09  | 0.52  | -3.12 | 2.71E-02 | -2.23 | 1.56E-01 | 2.78  | 2.07E-01 | M-2 |
| ENSMMUG00000022553  | PDK1       | Pyruvate Dehydrogenase Kinase 1                     | 64.18 | 15.13 | 8.89  | 16.41 | -2.07 | 2.69E-03 | -1.07 | 1.59E-01 | 1.03  | 3.72E-01 | M-2 |
| ENSMMUG00000015344  | CERKL      | Ceramide Kinase Like                                | 19.99 | 23.84 | 1.17  | 0.67  | -3.16 | 1.02E-02 | -0.35 | 8.41E-01 | -2.95 | 8.40E-02 | M-2 |
| ENSMMUG00000019462  | ITGAV      | Integrin Subunit Alpha V                            | 1.69  | 0.45  | 0.64  | 1.81  | -2.99 | 1.79E-02 | 1.22  | 4.02E-01 | 1.21  | 6.22E-01 | M-2 |
| ENSMMUG00000037672  | C12H2orf88 | Chromosome 12 Open Reading Frame, Human C2orf88     | 7.23  | 2.61  | 0.70  | 0.50  | -2.20 | 4.83E-02 | -1.89 | 9.36E-02 | 0.49  | 8.64E-01 | M-2 |
| ENSMMUG00000007283  | HIBCH      | 3-hydroxyisobutyryl-CoA Hydrolase                   | 66.41 | 12.34 | 7.58  | 7.71  | -2.35 | 2.48E-04 | -0.75 | 3.31E-01 | -0.41 | 7.99E-01 | M-2 |
| ENSMMUG00000000312  | ABI2       | Abl Interactor 2                                    | 15.92 | 7.85  | 4.20  | 2.53  | -1.32 | 4.94E-03 | -0.95 | 5.11E-02 | -0.39 | 7.00E-01 | M-2 |
| ENSMMUG00000001674  | ERBB4      | Erb-b2 Receptor Tyrosine Kinase 4                   | 17.65 | 6.24  | 1.01  | 0.13  | -2.45 | 1.70E-02 | -1.85 | 8.48E-02 | -2.35 | 1.15E-01 | M-2 |
| ENSMMUG000000005700 | BARD1      | BRCA1 Associated RING Domain 1                      | 15.04 | 2.37  | 1.98  | 1.98  | -2.55 | 2.38E-04 | -0.56 | 5.29E-01 | 0.20  | 9.31E-01 | M-2 |
| ENSMMUG00000017964  | PECR       | Peroxisomal Trans-2-enoyl-CoA Reductase             | 4.54  | 1.88  | 2.35  | 2.88  | -3.43 | 1.78E-02 | 0.59  | 7.67E-01 | -0.57 | 8.86E-01 | M-2 |
| ENSMMUG00000000791  | CNPPD1     | Cyclin Pas1/PHO80 Domain Containing 1               | 5.00  | 1.50  | 1.19  | 3.29  | -3.09 | 7.34E-03 | 0.74  | 6.14E-01 | 0.03  | 9.95E-01 | M-2 |
| ENSMMUG00000012003  | DNAJB2     | DnaJ Heat Shock Protein Family (Hsp40) Member B2    | 1.84  | 0.15  | 0.80  | 1.19  | -3.83 | 2.37E-02 | 2.58  | 1.57E-01 | 0.70  | 8.80E-01 | M-2 |
| ENSMMUG00000013246  | MFF        | Mitochondrial Fission Factor                        | 45.75 | 14.78 | 38.10 | 18.61 | -2.47 | 1.95E-02 | 1.77  | 1.07E-01 | -1.03 | 6.10E-01 | M-2 |
| ENSMMUG00000013252  | DAW1       | Dynein Assembly Factor With WD Repeats 1            | 1.40  | 0.27  | 0.35  | 0.08  | -6.83 | 6.04E-05 | 1.84  | 3.86E-01 | -0.93 | 8.37E-01 | M-2 |
| ENSMMUG000000005911 | GBX2       | Gastrulation Brain Homeobox 2                       | 2.51  | 0.62  | 0.26  | 0.60  | -3.40 | 3.39E-02 | -1.80 | 3.42E-01 | -0.11 | 9.86E-01 | M-2 |
| ENSMMUG00000003386  | LRRFIP1    | LRR Binding FLII Interacting Protein 1              | 13.64 | 9.00  | 7.78  | 14.77 | -1.16 | 2.04E-02 | 0.36  | 5.51E-01 | 0.36  | 7.45E-01 | M-2 |
| ENSMMUG00000015625  |            |                                                     | 0.60  | 0.12  | 0.33  | 0.73  | -2.82 | 3.81E-03 | 1.31  | 2.39E-01 | 1.16  | 5.18E-01 | M-2 |
| ENSMMUG00000016207  | PASK       | PAS Domain Containing Serine/threonine Kinase       | 5.13  | 0.96  | 0.85  | 1.97  | -2.79 | 6.14E-03 | -0.12 | 9.42E-01 | 0.38  | 8.96E-01 | M-2 |
| ENSMMUG00000014102  | ING5       | Inhibitor Of Growth Family Member 5                 | 3.71  | 0.81  | 3.09  | 3.77  | -3.31 | 1.74E-02 | 1.59  | 3.08E-01 | 1.24  | 6.54E-01 | M-2 |
| ENSMMUG00000018548  | D2HGDH     | D-2-hydroxyglutarate Dehydrogenase                  | 0.66  | 0.11  | 0.48  | 1.02  | -3.92 | 1.39E-02 | 2.47  | 1.54E-01 | -0.09 | 9.87E-01 | M-2 |
| ENSMMUG00000019611  | ARRDC1     | Arrestin Domain Containing 1                        | 1.76  | 0.54  | 0.94  | 1.25  | -3.37 | 2.49E-03 | -0.39 | 8.10E-01 | 2.45  | 1.23E-01 | M-2 |
| ENSMMUG00000022750  | DPP7       | Dipeptidyl Peptidase 7                              | 2.22  | 1.00  | 1.08  | 3.03  | -3.75 | 1.95E-02 | 1.17  | 5.48E-01 | 3.55  | 9.71E-02 | M-2 |
| ENSMMUG00000017506  | OLFM1      | Olfactomedin 1                                      | 5.96  | 1.56  | 1.23  | 0.41  | -3.31 | 3.54E-03 | -1.31 | 3.26E-01 | -0.68 | 8.10E-01 | M-2 |
| ENSMMUG00000022348  | SURF4      | Surfeit 4                                           | 62.35 | 7.31  | 11.55 | 14.58 | -3.28 | 2.56E-15 | 0.76  | 1.23E-01 | -0.04 | 9.84E-01 | M-2 |
| ENSMMUG00000047768  |            |                                                     | 1.21  | 0.16  | 0.21  | 0.10  | -5.29 | 4.27E-02 | 2.78  | 3.50E-01 | -1.11 | 8.73E-01 | M-2 |
| ENSMMUG00000011767  | CRAT       | Carnitine O-acetyltransferase                       | 2.04  | 0.80  | 1.37  | 0.60  | -2.24 | 3.85E-02 | 0.78  | 5.44E-01 | -1.87 | 2.36E-01 | M-2 |
| ENSMMUG00000014375  | FAM102A    | Family With Sequence Similarity 102 Member A        | 29.94 | 12.02 | 9.67  | 5.77  | -2.33 | 2.69E-02 | -1.71 | 1.19E-01 | -0.21 | 9.54E-01 | M-2 |
| ENSMMUG00000009961  | FAM129B    | Family With Sequence Similarity 129 Member B        | 8.22  | 1.07  | 1.10  | 4.61  | -2.71 | 1.71E-02 | -0.94 | 4.89E-01 | 2.66  | 8.44E-02 | M-2 |
| ENSMMUG00000011185  |            |                                                     | 11.98 | 3.18  | 13.96 | 8.35  | -2.06 | 4.92E-02 | 0.95  | 4.23E-01 | 0.27  | 9.33E-01 | M-2 |
| ENSMMUG00000022919  | STRBP      | Spermatid Perinuclear RNA Binding Protein           | 28.70 | 7.83  | 8.92  | 7.17  | -1.94 | 1.77E-06 | 0.31  | 5.68E-01 | -0.52 | 5.13E-01 | M-2 |
| ENSMMUG00000011455  | RBM18      | RNA Binding Motif Protein 18                        | 13.48 | 3.90  | 4.07  | 2.55  | -1.65 | 1.01E-03 | -0.21 | 7.67E-01 | -0.38 | 7.49E-01 | M-2 |
| ENSMMUG00000003197  | NIPSNAP3A  | Nipsnap Homolog 3A                                  | 4.48  | 1.19  | 1.67  | 6.63  | -4.02 | 1.44E-04 | 1.01  | 4.46E-01 | 1.53  | 4.16E-01 | M-2 |
| ENSMMUG000000043173 |            |                                                     | 2.43  | 0.07  | 0.03  | 0.03  | -7.76 | 3.18E-03 | 1.88  | 5.88E-01 | 0.41  | 9.68E-01 | M-2 |
| ENSMMUG00000009831  | TBC1D2     | TBC1 Domain Family Member 2                         | 1.53  | 0.60  | 0.14  | 0.67  | -2.55 | 2.12E-02 | -1.93 | 1.05E-01 | 1.76  | 3.37E-01 | M-2 |
| ENSMMUG00000015654  | TRMO       | TRNA Methyltransferase O                            | 3.25  | 1.17  | 2.82  | 2.56  | -2.34 | 3.65E-02 | 2.17  | 5.19E-02 | 0.09  | 9.82E-01 | M-2 |
| ENSMMUG00000012278  | TMOD1      | Tropomodulin 1                                      | 4.93  | 2.70  | 1.47  | 3.74  | -4.46 | 6.03E-04 | -0.64 | 7.34E-01 | -1.62 | 5.07E-01 | M-2 |
| ENSMMUG00000013691  | SUSD3      | Sushi Domain Containing 3                           | 3.02  | 1.56  | 0.51  | 1.83  | -4.33 | 3.85E-03 | 0.14  | 9.56E-01 | 2.19  | 4.34E-01 | M-2 |
| ENSMMUG00000016343  | MFSD14B    | Major Facilitator Superfamily Domain Containing 14B | 40.69 | 19.68 | 18.90 | 16.90 | -1.41 | 1.40E-02 | -0.15 | 8.53E-01 | 0.45  | 7.13E-01 | M-2 |

|                     |              |                                                             |        |        |        |        |       |          |       |          |       |          |     |
|---------------------|--------------|-------------------------------------------------------------|--------|--------|--------|--------|-------|----------|-------|----------|-------|----------|-----|
| ENSMMUG00000008669  | SLC25A52     | Solute Carrier Family 25 Member 52                          | 6.89   | 2.39   | 2.96   | 5.02   | -2.68 | 3.92E-02 | 0.48  | 7.87E-01 | -0.79 | 7.93E-01 | M-2 |
| ENSMMUG00000008196  | ACO1         | Aconitase 1                                                 | 13.97  | 8.22   | 6.78   | 11.45  | -2.24 | 2.11E-03 | 0.66  | 4.56E-01 | -0.69 | 6.43E-01 | M-2 |
| ENSMMUG000000047770 |              |                                                             | 8.48   | 3.59   | 2.08   | 0.18   | -4.27 | 1.83E-02 | -1.97 | 4.06E-01 | -1.39 | 7.61E-01 | M-2 |
| ENSMMUG000000020651 | SLC24A2      | Solute Carrier Family 24 Member 2                           | 5.78   | 0.55   | 0.50   | 0.22   | -2.74 | 2.54E-02 | -2.27 | 7.28E-02 | -0.11 | 9.81E-01 | M-2 |
| ENSMMUG000000018395 |              |                                                             | 21.80  | 9.45   | 13.00  | 13.97  | -1.71 | 1.60E-02 | 0.54  | 5.29E-01 | -0.10 | 9.69E-01 | M-2 |
| ENSMMUG000000012426 | ZDHHC21      | Zinc Finger DHHC-type Containing 21                         | 3.27   | 1.14   | 1.76   | 1.82   | -5.02 | 1.16E-03 | 2.03  | 2.49E-01 | 2.51  | 3.09E-01 | M-2 |
| ENSMMUG000000047679 |              |                                                             | 6.19   | 0.00   | 0.00   | 0.03   | -7.54 | 2.97E-02 | 0.99  | 8.44E-01 | 0.52  | 9.68E-01 | M-2 |
| ENSMMUG00000002176  | UHRF2        | Ubiquitin Like With PHD And Ring Finger Domains 2           | 74.85  | 28.09  | 11.82  | 10.03  | -1.41 | 1.38E-02 | -1.12 | 5.59E-02 | -0.23 | 8.87E-01 | M-2 |
| ENSMMUG000000005469 |              |                                                             | 23.23  | 4.75   | 6.59   | 3.06   | -2.40 | 3.10E-03 | 0.48  | 6.47E-01 | -1.51 | 2.19E-01 | M-2 |
| ENSMMUG000000000141 | CDC37L1      | Cell Division Cycle 37 Like 1                               | 29.53  | 5.80   | 19.72  | 10.26  | -2.40 | 3.37E-05 | 1.01  | 1.21E-01 | -0.51 | 6.96E-01 | M-2 |
| ENSMMUG000000008233 | TMEM252      | Transmembrane Protein 252                                   | 5.56   | 0.44   | 0.10   | 0.02   | -5.22 | 3.93E-02 | -2.07 | 4.95E-01 | 0.35  | 9.70E-01 | M-2 |
| ENSMMUG000000010401 | OSTF1        | Osteoclast Stimulating Factor 1                             | 60.72  | 8.85   | 8.74   | 15.62  | -2.72 | 6.53E-03 | -1.60 | 1.37E-01 | 2.55  | 5.20E-02 | M-2 |
| ENSMMUG000000023117 | NTRK2        | Neurotrophic Receptor Tyrosine Kinase 2                     | 1.67   | 0.27   | 0.09   | 0.00   | -4.89 | 9.95E-03 | -1.10 | 6.92E-01 | -3.26 | 3.34E-01 | M-2 |
| ENSMMUG000000001898 | NAA35        | N(alpha)-acetyltransferase 35, NatC Auxiliary Subunit       | 58.89  | 22.92  | 22.01  | 10.12  | -1.65 | 1.45E-02 | -0.29 | 7.53E-01 | -0.56 | 6.91E-01 | M-2 |
| ENSMMUG000000023257 | NFIL3        | Nuclear Factor, Interleukin 3 Regulated                     | 14.55  | 5.73   | 8.00   | 11.07  | -2.15 | 2.52E-02 | 0.68  | 5.59E-01 | -0.76 | 7.06E-01 | M-2 |
| ENSMMUG000000007990 | HSD17B3      | Hydroxysteroid 17-beta Dehydrogenase 3                      | 2.27   | 0.20   | 0.03   | 0.00   | -5.29 | 2.36E-03 | -1.93 | 3.70E-01 | 0.34  | 9.63E-01 | M-2 |
| ENSMMUG000000011369 |              |                                                             | 67.13  | 11.34  | 11.45  | 2.76   | -2.84 | 1.77E-03 | -0.58 | 6.24E-01 | -2.10 | 1.03E-01 | M-2 |
| ENSMMUG000000045908 | RNF144A      | Ring Finger Protein 144A                                    | 4.39   | 0.46   | 0.38   | 0.24   | -3.98 | 4.25E-05 | 0.11  | 9.48E-01 | -0.17 | 9.64E-01 | M-2 |
| ENSMMUG000000038242 | LOC106992835 | Uncharacterized LOC106992835                                | 4.70   | 0.63   | 0.07   | 0.05   | -4.65 | 1.37E-02 | -2.13 | 3.47E-01 | -2.40 | 5.16E-01 | M-2 |
| ENSMMUG000000038526 |              |                                                             | 5.16   | 0.11   | 0.24   | 0.03   | -8.26 | 6.26E-03 | 2.36  | 5.37E-01 | -5.03 | 3.09E-01 | M-2 |
| ENSMMUG000000009408 | ITSN2        | Intersectin 2                                               | 16.96  | 6.81   | 5.25   | 10.36  | -1.55 | 2.56E-02 | 0.15  | 8.78E-01 | 0.23  | 9.03E-01 | M-2 |
| ENSMMUG000000016587 | DTNB         | Dystrobrevin Beta                                           | 24.19  | 5.67   | 4.93   | 4.03   | -2.30 | 1.50E-02 | -1.62 | 1.02E-01 | -0.16 | 9.64E-01 | M-2 |
| ENSMMUG000000020563 | TRMT61B      | TRNA Methyltransferase 61B                                  | 1.46   | 0.54   | 2.10   | 0.94   | -2.47 | 9.75E-04 | 1.20  | 1.48E-01 | 1.47  | 1.98E-01 | M-2 |
| ENSMMUG000000010259 | CLIP4        | CAP-Gly Domain Containing Linker Protein Family Member 4    | 21.04  | 4.68   | 1.61   | 0.87   | -2.77 | 1.96E-03 | -1.70 | 8.02E-02 | -0.57 | 8.04E-01 | M-2 |
| ENSMMUG000000030883 | LOC106992887 | Protein FAM136A                                             | 13.16  | 4.68   | 7.81   | 5.75   | -3.06 | 6.01E-03 | 1.09  | 4.11E-01 | 0.79  | 7.59E-01 | M-2 |
| ENSMMUG000000016094 | YIPF4        | Yip1 Domain Family Member 4                                 | 5.87   | 1.91   | 3.20   | 3.28   | -3.22 | 5.98E-03 | 2.04  | 1.02E-01 | -1.28 | 5.69E-01 | M-2 |
| ENSMMUG000000045520 | RASGRP3      | RAS Guanyl Releasing Protein 3                              | 1.80   | 0.52   | 0.09   | 0.49   | -3.77 | 2.37E-02 | -1.31 | 5.32E-01 | 2.05  | 5.11E-01 | M-2 |
| ENSMMUG000000044092 |              |                                                             | 8.54   | 2.32   | 1.75   | 1.29   | -2.16 | 1.43E-02 | -0.24 | 8.50E-01 | -0.56 | 7.94E-01 | M-2 |
| ENSMMUG000000006311 | PREPL        | Prolyl Endopeptidase-like                                   | 64.64  | 23.43  | 13.21  | 9.12   | -1.49 | 3.95E-03 | -0.82 | 1.47E-01 | -0.99 | 1.99E-01 | M-2 |
| ENSMMUG000000014425 | PRKCE        | Protein Kinase C Epsilon                                    | 0.95   | 0.51   | 0.40   | 0.20   | -3.77 | 1.55E-02 | -0.53 | 8.14E-01 | -1.05 | 7.68E-01 | M-2 |
| ENSMMUG000000017466 | CALM2        | Calmodulin 2                                                | 102.12 | 49.74  | 82.03  | 68.90  | -0.95 | 4.39E-02 | 0.49  | 3.54E-01 | 0.02  | 9.93E-01 | M-2 |
| ENSMMUG000000015888 | CCDC85A      | Coiled-coil Domain Containing 85A                           | 3.66   | 1.81   | 0.25   | 0.25   | -4.34 | 9.48E-04 | 0.23  | 9.12E-01 | -0.80 | 8.07E-01 | M-2 |
| ENSMMUG000000008097 | AHSA2        | Activator Of HSP90 ATPase Homolog 2                         | 13.55  | 6.29   | 3.17   | 5.69   | -1.26 | 3.46E-02 | -0.56 | 4.11E-01 | 0.39  | 7.71E-01 | M-2 |
| ENSMMUG000000030824 |              |                                                             | 46.23  | 6.89   | 16.09  | 14.60  | -2.76 | 4.82E-04 | 1.43  | 9.83E-02 | -0.39 | 8.53E-01 | M-2 |
| ENSMMUG000000003979 | WDPCP        | WD Repeat Containing Planar Cell Polarity Effector          | 1.87   | 0.50   | 0.58   | 0.43   | -2.22 | 1.46E-02 | -0.27 | 8.34E-01 | -0.37 | 8.81E-01 | M-2 |
| ENSMMUG000000002096 | NAGK         | N-acetylglucosamine Kinase                                  | 4.41   | 0.88   | 1.79   | 7.76   | -2.14 | 1.51E-02 | 0.96  | 3.34E-01 | 1.79  | 1.45E-01 | M-2 |
| ENSMMUG000000015610 | DCTN1        | Dynactin Subunit 1                                          | 35.60  | 11.51  | 7.14   | 7.84   | -2.30 | 5.97E-05 | -0.45 | 5.42E-01 | -0.84 | 4.12E-01 | M-2 |
| ENSMMUG000000002139 | DOK1         | Docking Protein 1                                           | 1.35   | 0.29   | 0.67   | 0.62   | -3.01 | 3.46E-02 | 2.24  | 1.32E-01 | -1.44 | 5.85E-01 | M-2 |
| ENSMMUG000000019423 | ZNF2         | Zinc Finger Protein 2                                       | 3.96   | 1.06   | 1.15   | 0.55   | -2.83 | 4.88E-03 | 0.25  | 8.65E-01 | -1.51 | 3.62E-01 | M-2 |
| ENSMMUG000000023268 | ITPRIPL1     | ITPRIP Like 1                                               | 2.06   | 0.28   | 0.97   | 0.40   | -2.89 | 4.78E-02 | 0.56  | 7.70E-01 | -0.95 | 7.71E-01 | M-2 |
| ENSMMUG000000000572 | MITD1        | Microtubule Interacting And Trafficking Domain Containing 1 | 37.47  | 14.22  | 12.89  | 19.59  | -2.02 | 2.70E-02 | -0.53 | 6.43E-01 | 0.22  | 9.39E-01 | M-2 |
| ENSMMUG000000018946 | EIF5B        | Eukaryotic Translation Initiation Factor 5B                 | 780.81 | 318.64 | 240.09 | 140.37 | -1.40 | 7.45E-05 | -0.38 | 3.84E-01 | -0.84 | 9.51E-02 | M-2 |

|                     |          |                                                                           |        |       |       |       |       |          |       |          |       |          |     |
|---------------------|----------|---------------------------------------------------------------------------|--------|-------|-------|-------|-------|----------|-------|----------|-------|----------|-----|
| ENSMMUG00000021645  | CHST10   | Carbohydrate Sulfotransferase 10                                          | 6.16   | 0.62  | 0.19  | 0.45  | -3.51 | 1.26E-02 | -2.67 | 8.39E-02 | 1.50  | 5.90E-01 | M-2 |
| ENSMMUG00000010811  | MAP4K4   | Mitogen-activated Protein Kinase Kinase Kinase 4                          | 180.83 | 82.16 | 60.93 | 36.39 | -1.29 | 3.20E-02 | -0.38 | 6.05E-01 | -0.78 | 4.38E-01 | M-2 |
| ENSMMUG00000016594  | FHL2     | Four And A Half LIM Domains 2                                             | 1.93   | 0.41  | 0.28  | 0.11  | -4.18 | 1.34E-03 | 1.01  | 5.51E-01 | -1.08 | 7.28E-01 | M-2 |
| ENSMMUG0000001390   | NCK2     | NCK Adaptor Protein 2                                                     | 12.83  | 2.43  | 3.99  | 5.94  | -2.60 | 2.25E-02 | -0.33 | 8.37E-01 | -0.30 | 9.32E-01 | M-2 |
| ENSMMUG0000001697   |          |                                                                           | 5.65   | 0.03  | 0.44  | 0.49  | -7.08 | 2.33E-05 | 1.58  | 4.88E-01 | 0.64  | 8.97E-01 | M-2 |
| ENSMMUG00000016560  | SKA3     | Spindle And Kinetochore Associated Complex Subunit 3                      | 10.73  | 3.80  | 3.60  | 4.19  | -1.55 | 7.11E-03 | -0.01 | 9.92E-01 | -0.31 | 8.33E-01 | M-2 |
| ENSMMUG00000043288  |          |                                                                           | 6.00   | 0.18  | 2.12  | 1.76  | -5.81 | 8.16E-05 | 2.86  | 8.27E-02 | -2.07 | 4.40E-01 | M-2 |
| ENSMMUG00000008661  | SLC7A1   | Solute Carrier Family 7 Member 1                                          | 9.13   | 2.64  | 1.29  | 2.68  | -2.91 | 3.15E-02 | -0.08 | 9.68E-01 | -0.76 | 8.12E-01 | M-2 |
| ENSMMUG00000007192  | FRY      | FRY Microtubule Binding Protein                                           | 1.17   | 0.28  | 0.28  | 0.54  | -2.68 | 3.80E-02 | -0.59 | 7.26E-01 | 0.81  | 7.83E-01 | M-2 |
| ENSMMUG00000012307  | POSTN    | Periostin                                                                 | 4.38   | 0.47  | 0.49  | 0.05  | -3.51 | 1.00E-02 | -2.96 | 5.43E-02 | 0.14  | 9.80E-01 | M-2 |
| ENSMMUG00000007880  | ELF1     | E74 Like ETS Transcription Factor 1                                       | 16.28  | 5.56  | 7.63  | 10.58 | -1.57 | 1.77E-02 | 0.02  | 9.87E-01 | 0.57  | 6.70E-01 | M-2 |
| ENSMMUG00000007881  | WBP4     | WW Domain Binding Protein 4                                               | 35.03  | 14.02 | 8.97  | 9.31  | -1.57 | 8.91E-03 | -0.68 | 3.28E-01 | 0.65  | 5.72E-01 | M-2 |
| ENSMMUG00000009862  | RUBCNL   | RUN And Cysteine Rich Domain Containing Beclin 1 Interacting Protein Like | 4.89   | 0.34  | 0.30  | 0.21  | -3.85 | 1.15E-03 | -2.06 | 1.32E-01 | 1.47  | 5.42E-01 | M-2 |
| ENSMMUG00000021029  | RCBTB1   | RCC1 And BTB Domain Containing Protein 1                                  | 4.73   | 1.37  | 3.55  | 2.62  | -2.44 | 1.19E-02 | 0.92  | 4.18E-01 | 0.32  | 9.07E-01 | M-2 |
| ENSMMUG00000009579  | SPRYD7   | SPRY Domain Containing 7                                                  | 5.11   | 1.41  | 1.75  | 10.21 | -3.01 | 8.51E-03 | 0.22  | 8.97E-01 | 2.32  | 1.67E-01 | M-2 |
| ENSMMUG00000030714  |          |                                                                           | 363.12 | 23.58 | 37.55 | 39.99 | -4.06 | 3.44E-11 | 0.47  | 5.74E-01 | 0.79  | 5.23E-01 | M-2 |
| ENSMMUG00000002657  | OLFM4    | Olfactomedin 4                                                            | 8.28   | 1.18  | 0.29  | 0.65  | -3.76 | 5.61E-03 | -2.08 | 1.62E-01 | 3.00  | 1.20E-01 | M-2 |
| ENSMMUG000000037916 |          |                                                                           | 16.66  | 0.62  | 0.16  | 0.07  | -6.31 | 2.23E-03 | -1.81 | 4.88E-01 | -0.96 | 8.78E-01 | M-2 |
| ENSMMUG000000037926 |          |                                                                           | 3.66   | 1.08  | 0.42  | 0.59  | -2.18 | 2.78E-02 | -1.25 | 2.48E-01 | 1.65  | 2.72E-01 | M-2 |
| ENSMMUG00000021197  | TBC1D4   | TBC1 Domain Family Member 4                                               | 2.23   | 0.47  | 0.27  | 1.43  | -3.01 | 2.19E-02 | -2.49 | 6.95E-02 | 3.23  | 6.05E-02 | M-2 |
| ENSMMUG00000003560  | UCHL3    | Ubiquitin C-terminal Hydrolase L3                                         | 57.53  | 11.36 | 23.92 | 25.25 | -2.46 | 2.48E-03 | 1.09  | 2.37E-01 | -0.08 | 9.81E-01 | M-2 |
| ENSMMUG00000021817  | DCT      | Dopachrome Tautomerase                                                    | 2.33   | 0.47  | 0.36  | 0.03  | -5.18 | 2.19E-02 | -2.24 | 4.08E-01 | -4.24 | 2.38E-01 | M-2 |
| ENSMMUG00000009721  | CLDN10   | Claudin 10                                                                | 8.49   | 0.18  | 0.12  | 0.02  | -5.24 | 7.31E-04 | -1.75 | 3.90E-01 | -1.55 | 6.82E-01 | M-2 |
| ENSMMUG00000012332  | UBAC2    | UBA Domain Containing 2                                                   | 4.11   | 0.47  | 1.12  | 3.81  | -4.23 | 3.61E-05 | 0.81  | 5.44E-01 | 1.43  | 4.44E-01 | M-2 |
| ENSMMUG00000019556  | TM9SF2   | Transmembrane 9 Superfamily Member 2                                      | 49.35  | 15.35 | 30.88 | 37.57 | -1.79 | 2.25E-03 | 1.06  | 9.28E-02 | -0.24 | 8.87E-01 | M-2 |
| ENSMMUG000000044982 |          |                                                                           | 18.70  | 1.25  | 2.06  | 0.07  | -4.35 | 4.48E-02 | -2.44 | 3.61E-01 | -0.83 | 9.02E-01 | M-2 |
| ENSMMUG00000030627  | FAM155A  | Family With Sequence Similarity 155 Member A                              | 2.35   | 0.06  | 0.21  | 0.03  | -5.68 | 8.87E-04 | -0.53 | 8.55E-01 | -1.43 | 7.51E-01 | M-2 |
| ENSMMUG000000048566 | MCF2L    | MCF.2 Cell Line Derived Transforming Sequence Like                        | 1.61   | 0.20  | 0.20  | 0.84  | -4.07 | 1.06E-04 | 1.14  | 3.78E-01 | 0.73  | 7.78E-01 | M-2 |
| ENSMMUG00000009791  |          |                                                                           | 17.43  | 2.14  | 2.36  | 5.21  | -3.02 | 8.61E-04 | 0.23  | 8.66E-01 | 1.13  | 5.04E-01 | M-2 |
| ENSMMUG000000022526 |          |                                                                           | 0.62   | 0.25  | 1.73  | 0.07  | -4.25 | 4.38E-02 | 3.08  | 1.63E-01 | -4.34 | 1.45E-01 | M-2 |
| ENSMMUG00000009227  | YTHDF1   | YTH N6-methyladenosine RNA Binding Protein 1                              | 54.44  | 22.88 | 40.01 | 44.08 | -1.39 | 5.29E-03 | 0.75  | 1.65E-01 | 0.12  | 9.40E-01 | M-2 |
| ENSMMUG00000005011  |          |                                                                           | 7.61   | 1.08  | 0.74  | 0.62  | -3.90 | 1.25E-02 | -0.80 | 6.98E-01 | -0.33 | 9.52E-01 | M-2 |
| ENSMMUG00000014084  | LSM14B   | LSM Family Member 14B                                                     | 19.94  | 6.09  | 6.95  | 4.52  | -2.18 | 3.56E-02 | -0.11 | 9.44E-01 | -0.82 | 7.00E-01 | M-2 |
| ENSMMUG00000015391  | CTSZ     | Cathepsin Z                                                               | 1.17   | 0.24  | 0.86  | 3.26  | -4.78 | 1.73E-03 | 1.94  | 2.79E-01 | 3.35  | 1.30E-01 | M-2 |
| ENSMMUG00000010006  | STX16    | Syntaxin 16                                                               | 1.23   | 0.09  | 1.87  | 0.37  | -6.39 | 3.65E-05 | 2.53  | 1.62E-01 | 2.64  | 3.13E-01 | M-2 |
| ENSMMUG00000001833  | STX16    | Syntaxin 16                                                               | 11.73  | 3.23  | 6.72  | 9.80  | -1.87 | 6.01E-03 | 0.92  | 2.26E-01 | 1.12  | 2.92E-01 | M-2 |
| ENSMMUG00000000073  | CASS4    | Cas Scaffolding Protein Family Member 4                                   | 1.74   | 0.18  | 0.11  | 0.04  | -4.55 | 2.88E-04 | -0.48 | 8.03E-01 | -2.84 | 1.64E-01 | M-2 |
| ENSMMUG00000000918  | ATP9A    | ATPase Phospholipid Transporting 9A (putative)                            | 2.75   | 1.58  | 0.60  | 2.53  | -2.53 | 3.09E-02 | -0.70 | 6.30E-01 | 0.69  | 8.01E-01 | M-2 |
| ENSMMUG00000000757  | RNF114   | Ring Finger Protein 114                                                   | 68.03  | 24.37 | 18.98 | 15.85 | -1.28 | 4.40E-02 | -1.00 | 1.22E-01 | 0.67  | 5.59E-01 | M-2 |
| ENSMMUG00000013697  | PCIF1    | PDX1 C-terminal Inhibiting Factor 1                                       | 14.18  | 5.42  | 2.78  | 4.31  | -1.86 | 3.74E-02 | -0.25 | 8.41E-01 | -0.12 | 9.69E-01 | M-2 |
| ENSMMUG00000020172  | KIAA1755 | KIAA1755 Ortholog                                                         | 2.25   | 2.64  | 0.19  | 0.02  | -5.95 | 1.47E-03 | -2.67 | 2.39E-01 | -4.94 | 6.98E-02 | M-2 |
| ENSMMUG00000020957  | FER1L4   | Fer-1-like 4 (C. Elegans)                                                 | 0.96   | 0.35  | 0.07  | 0.02  | -4.29 | 4.69E-03 | -1.90 | 2.96E-01 | -2.83 | 2.64E-01 | M-2 |
| ENSMMUG00000007335  | CEP250   | Centrosomal Protein 250                                                   | 3.31   | 1.68  | 1.16  | 1.87  | -1.93 | 1.84E-02 | 0.62  | 5.29E-01 | -0.47 | 8.10E-01 | M-2 |

|                    |              |                                                                                     |       |       |       |       |       |          |       |          |       |          |     |
|--------------------|--------------|-------------------------------------------------------------------------------------|-------|-------|-------|-------|-------|----------|-------|----------|-------|----------|-----|
| ENSMMUG00000010032 | EDEM2        | ER Degradation Enhancing Alpha-mannosidase Like Protein 2                           | 17.15 | 7.43  | 5.40  | 10.82 | -1.55 | 4.89E-02 | -0.82 | 3.43E-01 | 1.36  | 2.34E-01 | M-2 |
| ENSMMUG00000000229 | TRPC4AP      | Transient Receptor Potential Cation Channel Subfamily C Member 4 Associated Protein | 30.48 | 12.26 | 7.04  | 5.39  | -1.91 | 3.95E-02 | -0.79 | 4.59E-01 | -0.39 | 8.67E-01 | M-2 |
| ENSMMUG00000018462 |              |                                                                                     | 3.49  | 1.17  | 1.76  | 10.57 | -2.32 | 3.71E-02 | 1.33  | 2.86E-01 | 1.56  | 3.86E-01 | M-2 |
| ENSMMUG00000021492 | ZNF341       | Zinc Finger Protein 341                                                             | 3.02  | 1.63  | 0.61  | 2.62  | -2.55 | 4.12E-02 | -0.12 | 9.50E-01 | 0.89  | 7.44E-01 | M-2 |
| ENSMMUG00000023543 | NECAB3       | N-terminal EF-hand Calcium Binding Protein 3                                        | 5.98  | 0.53  | 1.29  | 1.35  | -4.53 | 2.24E-03 | 1.13  | 5.50E-01 | -0.57 | 8.94E-01 | M-2 |
| ENSMMUG00000022546 | TCF15        | Transcription Factor 15                                                             | 11.23 | 3.45  | 7.30  | 2.72  | -2.30 | 2.74E-02 | 1.28  | 2.60E-01 | -1.01 | 6.15E-01 | M-2 |
| ENSMMUG00000004305 | STK35        | Serine/threonine Kinase 35                                                          | 43.29 | 15.94 | 15.95 | 12.84 | -1.37 | 2.65E-03 | -0.38 | 4.89E-01 | -0.03 | 9.84E-01 | M-2 |
| ENSMMUG00000010678 | OXT          | Oxytocin/neurophysin I Prepropeptide                                                | 4.09  | 0.22  | 0.11  | 0.01  | -5.74 | 2.73E-02 | -0.16 | 9.69E-01 | -0.05 | 9.97E-01 | M-2 |
| ENSMMUG00000013744 |              |                                                                                     | 35.94 | 8.98  | 14.28 | 9.82  | -1.76 | 1.20E-02 | 0.45  | 6.13E-01 | -0.75 | 5.73E-01 | M-2 |
| ENSMMUG00000018114 | SLX4IP       | SLX4 Interacting Protein                                                            | 10.62 | 3.27  | 3.12  | 2.45  | -2.73 | 8.75E-05 | 0.67  | 4.41E-01 | 0.09  | 9.74E-01 | M-2 |
| ENSMMUG00000020859 |              |                                                                                     | 1.57  | 0.67  | 1.57  | 1.18  | -2.75 | 3.27E-02 | 1.93  | 1.52E-01 | -1.26 | 6.05E-01 | M-2 |
| ENSMMUG00000041787 | PRODH        | Proline Dehydrogenase 1                                                             | 3.23  | 0.81  | 1.13  | 1.51  | -2.75 | 1.64E-02 | 1.11  | 4.05E-01 | -1.26 | 5.56E-01 | M-2 |
| ENSMMUG00000019925 | DGCR2        | DiGeorge Syndrome Critical Region Gene 2                                            | 4.00  | 0.95  | 3.13  | 3.91  | -3.19 | 2.25E-02 | 1.41  | 3.77E-01 | 0.60  | 8.69E-01 | M-2 |
| ENSMMUG00000005431 |              |                                                                                     | 0.36  | 0.06  | 0.41  | 1.58  | -3.33 | 1.20E-02 | 1.90  | 1.90E-01 | 3.24  | 5.86E-02 | M-2 |
| ENSMMUG00000017144 | RTL10        | Retrotransposon Gag Like 10                                                         | 15.31 | 1.79  | 1.61  | 2.24  | -3.94 | 5.98E-05 | 1.14  | 3.41E-01 | -0.62 | 8.05E-01 | M-2 |
| ENSMMUG00000005527 | PPM1F        | Protein Phosphatase, Mg2+/Mn2+ Dependent 1F                                         | 2.52  | 0.81  | 0.39  | 1.61  | -2.48 | 2.72E-02 | -1.23 | 3.46E-01 | 2.40  | 1.50E-01 | M-2 |
| ENSMMUG00000001776 | GNAZ         | G Protein Subunit Alpha Z                                                           | 2.79  | 2.10  | 0.21  | 0.11  | -5.05 | 7.69E-04 | -2.50 | 1.71E-01 | -1.66 | 5.95E-01 | M-2 |
| ENSMMUG00000002288 | LOC700936    | Gamma-glutamyltranspeptidase 1                                                      | 0.92  | 0.10  | 0.72  | 0.55  | -5.59 | 1.10E-03 | 1.78  | 3.91E-01 | 1.30  | 7.34E-01 | M-2 |
| ENSMMUG00000023441 | ASPHD2       | Aspartate Beta-hydroxylase Domain Containing 2                                      | 3.43  | 0.81  | 0.91  | 0.44  | -3.21 | 4.01E-02 | -0.84 | 6.86E-01 | -1.64 | 6.00E-01 | M-2 |
| ENSMMUG00000048595 |              |                                                                                     | 2.58  | 0.72  | 1.37  | 0.75  | -3.12 | 3.27E-02 | 2.08  | 1.90E-01 | -1.52 | 5.76E-01 | M-2 |
| ENSMMUG00000000025 | ZNRF3        | Zinc And Ring Finger 3                                                              | 2.12  | 0.64  | 1.81  | 1.59  | -2.04 | 3.29E-02 | 1.82  | 5.76E-02 | -1.27 | 4.22E-01 | M-2 |
| ENSMMUG00000005553 | TBC1D10A     | TBC1 Domain Family Member 10A                                                       | 1.90  | 0.36  | 0.54  | 0.31  | -2.16 | 1.92E-02 | 0.37  | 7.69E-01 | -1.34 | 3.79E-01 | M-2 |
| ENSMMUG00000018299 | OSBP2        | Oxysterol Binding Protein 2                                                         | 7.04  | 1.48  | 0.33  | 0.26  | -3.42 | 4.40E-03 | -2.35 | 6.40E-02 | 0.26  | 9.52E-01 | M-2 |
| ENSMMUG00000041493 | LOC107000631 | Uncharacterized LOC107000631                                                        | 5.12  | 1.80  | 0.07  | 0.39  | -4.91 | 4.54E-02 | -4.00 | 1.41E-01 | 1.23  | 8.48E-01 | M-2 |
| ENSMMUG00000049206 | RBOX2        | RNA Binding Fox-1 Homolog 2                                                         | 4.66  | 0.96  | 1.25  | 1.75  | -2.39 | 3.12E-02 | 0.89  | 4.93E-01 | 0.72  | 7.74E-01 | M-2 |
| ENSMMUG00000005417 | IL2RB        | Interleukin 2 Receptor Subunit Beta                                                 | 3.58  | 0.11  | 0.01  | 0.03  | -8.97 | 6.60E-09 | 0.19  | 9.49E-01 | 1.86  | 5.93E-01 | M-2 |
| ENSMMUG00000021345 | TNRC6B       | Trinucleotide Repeat Containing 6B                                                  | 74.12 | 13.27 | 13.40 | 7.52  | -2.30 | 5.54E-06 | -0.42 | 5.23E-01 | -0.62 | 5.28E-01 | M-2 |
| ENSMMUG00000008135 | SGSM3        | Small G Protein Signaling Modulator 3                                               | 2.22  | 0.26  | 1.57  | 1.93  | -4.24 | 6.51E-04 | 1.73  | 2.27E-01 | 0.71  | 8.20E-01 | M-2 |
| ENSMMUG00000005252 | SULT4A1      | Sulfotransferase Family 4A Member 1                                                 | 1.14  | 0.24  | 0.63  | 0.67  | -4.41 | 5.29E-03 | 0.55  | 8.06E-01 | 0.92  | 8.12E-01 | M-2 |
| ENSMMUG00000003764 | LOC719018    | TBC1 Domain Family Member 22A-like                                                  | 6.24  | 1.35  | 0.96  | 1.28  | -2.48 | 7.36E-03 | -1.16 | 2.66E-01 | -0.12 | 9.72E-01 | M-2 |
| ENSMMUG00000011273 | ALG12        | ALG12, Alpha-1,6-mannosyltransferase                                                | 3.09  | 0.88  | 1.38  | 2.57  | -4.05 | 7.56E-04 | 2.07  | 1.17E-01 | 0.40  | 9.10E-01 | M-2 |
| ENSMMUG00000011023 | PANX2        | Pannexin 2                                                                          | 1.44  | 0.32  | 0.06  | 0.07  | -3.45 | 2.88E-02 | -2.46 | 1.69E-01 | -0.46 | 9.33E-01 | M-2 |
| ENSMMUG00000014106 | MAPK12       | Mitogen-activated Protein Kinase 12                                                 | 1.79  | 0.10  | 1.00  | 0.73  | -5.24 | 4.51E-03 | 1.53  | 5.07E-01 | 3.39  | 2.38E-01 | M-2 |
| ENSMMUG00000030970 | LMF2         | Lipase Maturation Factor 2                                                          | 1.11  | 0.38  | 1.25  | 2.88  | -3.22 | 2.95E-02 | 1.63  | 3.25E-01 | -0.08 | 9.87E-01 | M-2 |
| ENSMMUG00000010699 | DPH1         | Diphthamide Biosynthesis 1                                                          | 1.03  | 3.04  | 2.40  | 3.49  | -3.45 | 4.00E-02 | 2.49  | 1.52E-01 | 2.39  | 3.58E-01 | M-2 |
| ENSMMUG00000017763 | PITPNM3      | PITPNM Family Member 3                                                              | 4.51  | 1.97  | 0.29  | 0.54  | -3.24 | 1.28E-03 | -1.50 | 1.91E-01 | -1.65 | 3.25E-01 | M-2 |
| ENSMMUG00000015617 | PLSCR3       | Phospholipid Scramblase 3                                                           | 3.30  | 0.06  | 0.20  | 0.97  | -5.99 | 6.70E-04 | -0.17 | 9.56E-01 | 2.72  | 3.60E-01 | M-2 |
| ENSMMUG00000021938 | NDEL1        | NudE Neurodevelopment Protein 1 Like 1                                              | 76.69 | 6.94  | 4.85  | 6.90  | -3.57 | 5.21E-05 | -0.92 | 4.02E-01 | -0.13 | 9.70E-01 | M-2 |
| ENSMMUG00000005900 | GID4         | GID Complex Subunit 4 Homolog                                                       | 28.41 | 9.33  | 7.37  | 4.27  | -1.45 | 2.15E-03 | -0.35 | 5.58E-01 | -0.96 | 1.67E-01 | M-2 |
| ENSMMUG00000000140 | EPN2         | Epsin 2                                                                             | 18.87 | 5.72  | 9.68  | 5.01  | -1.53 | 2.80E-02 | 0.31  | 7.36E-01 | 0.09  | 9.69E-01 | M-2 |

|                     |           |                                                                         |       |       |       |       |       |          |       |          |       |          |     |
|---------------------|-----------|-------------------------------------------------------------------------|-------|-------|-------|-------|-------|----------|-------|----------|-------|----------|-----|
| ENSMMUG00000019667  | TAOK1     | TAO Kinase 1                                                            | 16.22 | 5.53  | 5.14  | 7.80  | -2.78 | 5.55E-06 | 0.62  | 4.24E-01 | 0.03  | 9.91E-01 | M-2 |
| ENSMMUG00000014413  | SSH2      | Slingshot Protein Phosphatase 2                                         | 3.27  | 1.99  | 0.86  | 2.11  | -1.65 | 2.25E-02 | -0.49 | 5.74E-01 | 0.50  | 7.54E-01 | M-2 |
| ENSMMUG00000000750  | RFFL      | Ring Finger And FYVE Like Domain Containing E3 Ubiquitin Protein Ligase | 38.68 | 2.94  | 3.55  | 2.53  | -4.56 | 1.07E-10 | -0.58 | 5.48E-01 | 0.13  | 9.65E-01 | M-2 |
| ENSMMUG00000002069  | MSI2      | Musashi RNA Binding Protein 2                                           | 13.03 | 4.33  | 1.52  | 0.77  | -2.90 | 2.79E-02 | -2.04 | 1.43E-01 | 0.76  | 8.11E-01 | M-2 |
| ENSMMUG00000005793  |           |                                                                         | 0.97  | 0.19  | 0.13  | 0.04  | -6.26 | 2.10E-03 | -0.87 | 7.79E-01 | -1.47 | 7.60E-01 | M-2 |
| ENSMMUG00000022628  | MMD       | Monocyte To Macrophage Differentiation Associated                       | 3.25  | 2.33  | 1.93  | 2.80  | -2.64 | 3.21E-03 | 0.64  | 5.72E-01 | 2.12  | 8.44E-02 | M-2 |
| ENSMMUG00000013737  | CA10      | Carbonic Anhydrase 10                                                   | 2.78  | 0.14  | 0.03  | 0.01  | -4.69 | 5.04E-04 | -2.20 | 1.97E-01 | -0.78 | 8.50E-01 | M-2 |
| ENSMMUG00000020531  | SOCS7     | Suppressor Of Cytokine Signaling 7                                      | 34.32 | 4.37  | 5.84  | 1.52  | -3.20 | 3.47E-05 | -0.93 | 3.19E-01 | -1.96 | 7.64E-02 | M-2 |
| ENSMMUG00000017341  | ZBP2      | Zona Pellucida Binding Protein 2                                        | 3.39  | 0.84  | 0.12  | 0.01  | -2.80 | 2.54E-02 | -2.58 | 5.43E-02 | -0.83 | 8.11E-01 | M-2 |
| ENSMMUG00000002931  |           |                                                                         | 13.30 | 4.59  | 0.63  | 0.81  | -2.67 | 6.31E-03 | -0.75 | 5.41E-01 | -0.29 | 9.23E-01 | M-2 |
| ENSMMUG00000009384  | IGFBP4    | Insulin Like Growth Factor Binding Protein 4                            | 2.10  | 1.79  | 0.02  | 0.05  | -8.33 | 4.88E-03 | 0.98  | 8.19E-01 | -4.81 | 3.23E-01 | M-2 |
| ENSMMUG00000004004  | KRT222    | Keratin 222                                                             | 8.66  | 0.64  | 1.90  | 0.03  | -4.19 | 1.58E-03 | -0.60 | 7.57E-01 | -3.26 | 1.42E-01 | M-2 |
| ENSMMUG00000003437  |           |                                                                         | 1.23  | 0.08  | 0.41  | 0.69  | -4.21 | 5.41E-03 | 2.22  | 1.85E-01 | 0.86  | 8.15E-01 | M-2 |
| ENSMMUG00000010707  | STAT3     | Signal Transducer And Activator Of Transcription 3                      | 12.68 | 6.09  | 7.95  | 7.19  | -1.51 | 3.03E-02 | 0.55  | 5.04E-01 | -0.60 | 6.69E-01 | M-2 |
| ENSMMUG00000009886  | COASY     | Coenzyme A Synthase                                                     | 5.64  | 2.24  | 5.44  | 7.02  | -2.30 | 2.53E-02 | 1.72  | 1.05E-01 | 0.73  | 7.43E-01 | M-2 |
| ENSMMUG00000009203  | RNFT1     | Ring Finger Protein, Transmembrane 1                                    | 9.18  | 2.34  | 6.25  | 6.02  | -1.95 | 4.24E-02 | 1.23  | 2.29E-01 | 0.26  | 9.28E-01 | M-2 |
| ENSMMUG00000011809  | PECAM1    | Platelet And Endothelial Cell Adhesion Molecule 1                       | 4.58  | 3.10  | 0.91  | 5.28  | -4.31 | 3.14E-05 | 0.44  | 7.76E-01 | 0.50  | 8.60E-01 | M-2 |
| ENSMMUG00000023405  | OTOP3     | Otopettrin 3                                                            | 0.74  | 0.17  | 0.32  | 0.01  | -5.55 | 1.80E-02 | 0.06  | 9.86E-01 | -0.18 | 9.84E-01 | M-2 |
| ENSMMUG00000015512  | BAIAP2    | BAI1 Associated Protein 2                                               | 22.43 | 3.93  | 2.83  | 1.13  | -2.40 | 5.59E-04 | -0.64 | 4.61E-01 | -1.59 | 1.17E-01 | M-2 |
| ENSMMUG00000010887  |           |                                                                         | 1.10  | 0.07  | 0.54  | 1.94  | -3.96 | 2.60E-03 | 1.91  | 2.02E-01 | 2.50  | 1.99E-01 | M-2 |
| ENSMMUG00000012799  | RFNG      | RFNG O-fucosylpeptide 3-beta-N-acetylglucosaminyltransferase            | 2.13  | 0.25  | 1.33  | 2.99  | -5.54 | 1.29E-04 | 1.86  | 2.92E-01 | 1.54  | 6.25E-01 | M-2 |
| ENSMMUG00000019224  | NARF      | Nuclear Prelamin A Recognition Factor                                   | 9.27  | 1.65  | 3.95  | 3.78  | -2.29 | 5.31E-06 | 1.08  | 5.04E-02 | 0.19  | 9.00E-01 | M-2 |
| ENSMMUG00000021803  | WDR45B    | WD Repeat Domain 45B                                                    | 27.79 | 12.23 | 7.89  | 8.14  | -1.33 | 2.93E-02 | -0.61 | 3.79E-01 | 0.67  | 5.38E-01 | M-2 |
| ENSMMUG00000000599  | FAM234A   | Family With Sequence Similarity 234 Member A                            | 3.74  | 1.35  | 1.28  | 8.48  | -3.97 | 1.36E-03 | 0.84  | 6.04E-01 | 2.98  | 8.19E-02 | M-2 |
| ENSMMUG000000037575 |           |                                                                         | 12.86 | 1.93  | 4.75  | 17.85 | -3.33 | 1.01E-02 | 1.62  | 2.64E-01 | 1.75  | 4.36E-01 | M-2 |
| ENSMMUG00000012440  | UNKL      | Unkempt Family Like Zinc Finger                                         | 5.85  | 0.83  | 0.88  | 1.00  | -2.88 | 2.49E-03 | -0.19 | 8.97E-01 | -0.59 | 8.05E-01 | M-2 |
| ENSMMUG00000000737  | HAGH      | Hydroxyacylglutathione Hydrolase                                        | 2.61  | 0.18  | 0.33  | 1.38  | -6.03 | 1.07E-06 | 2.06  | 1.56E-01 | 0.85  | 7.85E-01 | M-2 |
| ENSMMUG00000029263  | PKD1      | Polycystin 1, Transient Receptor Potential Channel Interacting          | 1.49  | 0.34  | 0.32  | 0.34  | -2.71 | 3.38E-03 | -0.12 | 9.35E-01 | -0.61 | 7.85E-01 | M-2 |
| ENSMMUG00000044909  | TVP23A    | Trans-golgi Network Vesicle Protein 23 Homolog A                        | 1.25  | 0.67  | 0.10  | 0.24  | -2.96 | 3.51E-02 | -1.13 | 4.95E-01 | 0.16  | 9.75E-01 | M-2 |
| ENSMMUG00000011242  | ZC3H7A    | Zinc Finger CCCH-type Containing 7A                                     | 36.38 | 8.71  | 11.00 | 8.49  | -1.86 | 4.73E-04 | -0.05 | 9.54E-01 | -0.16 | 9.20E-01 | M-2 |
| ENSMMUG00000020428  | TNRC6A    | Trinucleotide Repeat Containing 6A                                      | 31.98 | 10.56 | 9.47  | 8.56  | -1.36 | 1.42E-03 | -0.24 | 6.80E-01 | -0.01 | 9.96E-01 | M-2 |
| ENSMMUG00000001407  | SLC5A11   | Solute Carrier Family 5 Member 11                                       | 3.90  | 0.56  | 0.37  | 0.11  | -3.17 | 4.59E-03 | 0.08  | 9.65E-01 | -2.18 | 2.14E-01 | M-2 |
| ENSMMUG00000029176  | ARHGAP17  | Rho GTPase Activating Protein 17                                        | 1.78  | 0.33  | 0.14  | 0.24  | -3.22 | 7.36E-03 | -1.24 | 4.05E-01 | 0.09  | 9.86E-01 | M-2 |
| ENSMMUG00000023524  | SH2B1     | SH2B Adaptor Protein 1                                                  | 5.89  | 0.93  | 0.78  | 2.05  | -2.72 | 4.74E-02 | -1.33 | 3.90E-01 | 2.89  | 1.18E-01 | M-2 |
| ENSMMUG00000016422  | MVP       | Major Vault Protein                                                     | 20.68 | 5.15  | 2.26  | 1.54  | -2.60 | 1.15E-03 | -0.17 | 8.87E-01 | -1.82 | 1.12E-01 | M-2 |
| ENSMMUG00000047946  | LOC714758 | Putative Zinc Finger Protein 724                                        | 9.32  | 3.92  | 3.11  | 2.41  | -2.66 | 8.44E-03 | 1.28  | 2.55E-01 | -1.43 | 4.04E-01 | M-2 |
| ENSMMUG00000019902  | AMFR      | Autocrine Motility Factor Receptor                                      | 12.06 | 3.42  | 7.31  | 10.40 | -1.60 | 4.02E-02 | 1.34  | 9.11E-02 | -0.02 | 9.95E-01 | M-2 |

|                     |              |                                                                       |        |       |       |       |       |          |       |          |       |          |     |
|---------------------|--------------|-----------------------------------------------------------------------|--------|-------|-------|-------|-------|----------|-------|----------|-------|----------|-----|
| ENSMMUG00000029125  | OGFOD1       | 2-oxoglutarate And Iron<br>Dependent Oxygenase<br>Domain Containing 1 | 44.56  | 13.26 | 10.59 | 6.64  | -2.00 | 2.20E-03 | -0.08 | 9.41E-01 | -1.15 | 2.62E-01 | M-2 |
| ENSMMUG00000029108  | CKLF         | Chemokine-like Factor                                                 | 3.60   | 0.97  | 3.27  | 4.37  | -2.69 | 2.42E-02 | 1.31  | 3.27E-01 | 1.76  | 3.49E-01 | M-2 |
| ENSMMUG00000020848  | CMTM4        | CKLF Like MARVEL<br>Transmembrane Domain<br>Containing 4              | 6.51   | 0.85  | 2.71  | 7.38  | -3.65 | 3.98E-03 | 2.07  | 1.32E-01 | 2.94  | 9.18E-02 | M-2 |
| ENSMMUG00000018111  | FHOD1        | Formin Homology 2<br>Domain Containing 1                              | 2.58   | 0.41  | 1.46  | 2.00  | -3.05 | 8.72E-03 | 1.23  | 3.59E-01 | 1.36  | 5.20E-01 | M-2 |
| ENSMMUG00000010922  | HAS3         | Hyaluronan Synthase 3                                                 | 2.99   | 0.57  | 1.07  | 0.18  | -4.27 | 1.37E-03 | -0.97 | 5.80E-01 | 1.96  | 4.36E-01 | M-2 |
| ENSMMUG00000004391  | CHST4        | Carbohydrate<br>Sulfotransferase 4                                    | 3.86   | 0.44  | 0.16  | 0.12  | -6.78 | 2.36E-05 | -1.10 | 6.42E-01 | -0.86 | 8.51E-01 | M-2 |
| ENSMMUG00000008375  | RFWD3        | Ring Finger And WD Repeat<br>Domain 3                                 | 62.44  | 23.80 | 10.39 | 10.83 | -1.87 | 4.14E-02 | -1.32 | 1.68E-01 | -0.61 | 7.64E-01 | M-2 |
| ENSMMUG00000008381  | FA2H         | Fatty Acid 2-hydroxylase                                              | 2.30   | 1.89  | 0.36  | 0.42  | -2.98 | 4.89E-02 | -1.54 | 3.84E-01 | 0.04  | 9.94E-01 | M-2 |
| ENSMMUG00000011847  | CDYL2        | Chromodomain Y Like 2                                                 | 0.57   | 0.16  | 0.29  | 1.31  | -3.95 | 1.87E-02 | 1.31  | 5.20E-01 | 3.15  | 1.79E-01 | M-2 |
| ENSMMUG00000011893  | KIAA0513     | KIAA0513 Ortholog                                                     | 2.00   | 1.29  | 0.45  | 0.39  | -4.61 | 6.16E-03 | -0.96 | 6.81E-01 | -4.05 | 9.80E-02 | M-2 |
| ENSMMUG000000041678 |              |                                                                       | 0.73   | 0.01  | 0.13  | 1.65  | -5.38 | 4.33E-02 | 3.27  | 2.68E-01 | 3.96  | 3.29E-01 | M-2 |
| ENSMMUG00000012430  | GALNS        | Galactosamine (N-acetyl)-6-<br>sulfatase                              | 0.48   | 0.17  | 0.14  | 0.86  | -4.09 | 2.19E-02 | 0.89  | 7.10E-01 | 2.15  | 5.07E-01 | M-2 |
| ENSMMUG00000011961  | FAM210A      | Family With Sequence<br>Similarity 210 Member A                       | 113.13 | 61.51 | 31.02 | 47.93 | -1.23 | 3.16E-02 | -0.38 | 5.87E-01 | 0.52  | 6.47E-01 | M-2 |
| ENSMMUG000000041910 |              |                                                                       | 1.06   | 0.64  | 0.21  | 0.06  | -3.87 | 1.69E-02 | -2.50 | 1.88E-01 | -2.28 | 4.21E-01 | M-2 |
| ENSMMUG000000017548 | LPIN2        | Lipin 2                                                               | 10.23  | 3.77  | 4.07  | 3.45  | -1.46 | 1.37E-02 | -1.06 | 8.71E-02 | 0.95  | 3.07E-01 | M-2 |
| ENSMMUG000000004046 | TYMS         | Thymidylate Synthetase                                                | 161.18 | 53.52 | 33.88 | 39.63 | -1.79 | 9.93E-05 | -0.30 | 6.25E-01 | 0.28  | 8.15E-01 | M-2 |
| ENSMMUG000000004382 | ABHD3        | Abhydrolase Domain<br>Containing 3                                    | 7.30   | 2.65  | 3.75  | 1.53  | -2.88 | 1.32E-02 | 0.59  | 6.98E-01 | 0.87  | 7.36E-01 | M-2 |
| ENSMMUG000000021484 | NPC1         | NPC Intracellular<br>Cholesterol Transporter 1                        | 25.05  | 9.85  | 15.19 | 17.01 | -1.56 | 1.87E-02 | 0.14  | 8.85E-01 | 0.58  | 6.65E-01 | M-2 |
| ENSMMUG000000021094 | DSG3         | Desmoglein 3                                                          | 1.42   | 0.28  | 0.06  | 0.25  | -4.71 | 1.49E-02 | -2.40 | 2.94E-01 | 1.29  | 7.80E-01 | M-2 |
| ENSMMUG000000016674 | B4GALT6      | Beta-1,4-<br>galactosyltransferase 6                                  | 8.27   | 2.55  | 2.00  | 5.59  | -2.15 | 2.12E-03 | -0.87 | 2.84E-01 | 1.24  | 2.52E-01 | M-2 |
| ENSMMUG000000020670 | LOC693664    | Pseudouridine-5'-<br>phosphatase                                      | 1.68   | 0.95  | 0.47  | 5.58  | -3.15 | 4.21E-02 | 0.38  | 8.68E-01 | 2.70  | 2.38E-01 | M-2 |
| ENSMMUG000000048233 |              |                                                                       | 2.28   | 0.03  | 1.84  | 12.32 | -4.96 | 7.62E-03 | 3.51  | 7.73E-02 | 4.33  | 6.73E-02 | M-2 |
| ENSMMUG000000040394 |              |                                                                       | 5.77   | 1.67  | 0.84  | 0.19  | -4.45 | 2.79E-02 | -0.79 | 7.78E-01 | -2.48 | 5.25E-01 | M-2 |
| ENSMMUG000000003124 | HAUS1        | HAUS Augmin Like Complex<br>Subunit 1                                 | 2.79   | 0.71  | 1.37  | 2.28  | -1.80 | 2.80E-02 | 0.51  | 6.20E-01 | 0.57  | 7.56E-01 | M-2 |
| ENSMMUG000000010911 | POLI         | DNA Polymerase Iota                                                   | 10.58  | 1.17  | 1.45  | 3.55  | -3.50 | 7.03E-10 | -0.02 | 9.87E-01 | 1.39  | 1.13E-01 | M-2 |
| ENSMMUG000000022568 | FECH         | Ferredoxin-like<br>Ferrochelatase                                     | 1.21   | 0.59  | 0.68  | 1.75  | -4.44 | 8.64E-03 | 1.13  | 6.05E-01 | -0.38 | 9.47E-01 | M-2 |
| ENSMMUG000000022873 | LOC100424017 | Serpin B8                                                             | 1.87   | 0.37  | 1.18  | 0.45  | -3.09 | 3.76E-02 | 1.22  | 4.79E-01 | -1.62 | 5.41E-01 | M-2 |
| ENSMMUG000000000576 | CDH7         | Cadherin 7                                                            | 1.08   | 0.21  | 0.15  | 0.08  | -4.65 | 1.76E-02 | 0.86  | 7.51E-01 | -4.00 | 1.74E-01 | M-2 |
| ENSMMUG000000010169 |              |                                                                       | 26.04  | 6.52  | 2.57  | 5.05  | -2.44 | 6.08E-04 | -1.24 | 1.14E-01 | 0.75  | 6.00E-01 | M-2 |
| ENSMMUG000000047554 |              |                                                                       | 3.43   | 0.14  | 0.83  | 0.03  | -6.33 | 2.71E-02 | 1.07  | 7.98E-01 | -1.56 | 8.30E-01 | M-2 |
| ENSMMUG000000013607 | CYB5A        | Cytochrome B5 Type A<br>(microsomal)                                  | 67.50  | 14.29 | 7.12  | 9.49  | -2.42 | 7.35E-03 | -1.45 | 1.36E-01 | 0.89  | 6.18E-01 | M-2 |
| ENSMMUG000000047601 |              |                                                                       | 0.81   | 0.40  | 0.25  | 2.01  | -7.38 | 4.32E-02 | 4.21  | 2.98E-01 | 1.07  | 9.18E-01 | M-2 |
| ENSMMUG000000044288 |              |                                                                       | 28.21  | 3.22  | 4.75  | 3.59  | -3.19 | 2.91E-03 | 0.31  | 8.41E-01 | -0.48 | 8.68E-01 | M-2 |
| ENSMMUG000000048414 |              |                                                                       | 1.87   | 0.43  | 1.87  | 0.18  | -3.80 | 4.45E-02 | -1.12 | 6.36E-01 | 0.26  | 9.69E-01 | M-2 |
| ENSMMUG000000012768 |              |                                                                       | 2.30   | 1.35  | 0.56  | 0.86  | -3.48 | 4.97E-03 | 0.37  | 8.39E-01 | -2.10 | 3.05E-01 | M-2 |
| ENSMMUG000000003043 | LOC706727    | PWWP Domain-containing<br>Protein MUM1                                | 2.13   | 0.61  | 1.28  | 2.68  | -2.99 | 9.53E-03 | 1.82  | 1.38E-01 | 1.74  | 3.51E-01 | M-2 |
| ENSMMUG000000003053 | APC2         | APC2, WNT Signaling<br>Pathway Regulator                              | 1.47   | 0.13  | 0.36  | 0.07  | -4.17 | 7.61E-04 | 0.45  | 8.06E-01 | -0.74 | 8.19E-01 | M-2 |
| ENSMMUG000000007269 | ZNF554       | Zinc Finger Protein 554                                               | 2.74   | 0.34  | 0.45  | 0.76  | -4.55 | 2.26E-04 | 2.02  | 1.47E-01 | 0.58  | 8.64E-01 | M-2 |
| ENSMMUG000000002961 | GNA11        | G Protein Subunit Alpha 11                                            | 23.61  | 8.49  | 11.15 | 10.74 | -1.52 | 3.75E-03 | 0.35  | 5.98E-01 | 0.00  | 1.00E+00 | M-2 |
| ENSMMUG000000019870 | FZR1         | Fizzy And Cell Division Cycle<br>20 Related 1                         | 6.98   | 3.11  | 1.58  | 1.89  | -2.10 | 3.08E-02 | -0.85 | 4.56E-01 | -1.61 | 2.71E-01 | M-2 |
| ENSMMUG000000020705 |              |                                                                       | 2.04   | 0.21  | 0.10  | 0.17  | -4.13 | 2.92E-02 | -2.17 | 3.24E-01 | 3.03  | 3.22E-01 | M-2 |
| ENSMMUG000000016695 | CD320        | CD320 Molecule                                                        | 4.40   | 1.89  | 0.86  | 0.34  | -3.39 | 3.00E-02 | -0.77 | 7.06E-01 | 0.37  | 9.46E-01 | M-2 |
| ENSMMUG000000039202 |              |                                                                       | 5.33   | 0.38  | 0.11  | 0.03  | -6.05 | 1.70E-02 | 0.33  | 9.37E-01 | -3.09 | 5.21E-01 | M-2 |
| ENSMMUG000000043134 | CCDC159      | Coiled-coil Domain<br>Containing 159                                  | 1.40   | 0.12  | 0.51  | 0.37  | -4.47 | 1.05E-02 | 0.04  | 9.88E-01 | 0.41  | 9.46E-01 | M-2 |
| ENSMMUG000000005236 | ZNF709       | Zinc Finger Protein 709                                               | 5.81   | 2.80  | 2.23  | 1.64  | -1.57 | 4.36E-02 | 0.13  | 9.04E-01 | -0.81 | 5.67E-01 | M-2 |
| ENSMMUG000000017971 |              |                                                                       | 7.14   | 8.32  | 4.41  | 7.37  | -2.79 | 4.13E-02 | 0.45  | 8.08E-01 | -2.18 | 2.88E-01 | M-2 |



|                     |              |                                                               |        |       |       |       |       |          |       |          |       |          |     |
|---------------------|--------------|---------------------------------------------------------------|--------|-------|-------|-------|-------|----------|-------|----------|-------|----------|-----|
| ENSMMUG0000000491   | HAUS8        | HAUS Augmin Like Complex Subunit 8                            | 31.78  | 8.49  | 7.70  | 8.87  | -2.54 | 1.19E-03 | 0.10  | 9.40E-01 | 1.04  | 4.58E-01 | M-2 |
| ENSMMUG00000004406  | PGPEP1       | Pyroglutamyl-peptidase I                                      | 17.96  | 4.28  | 1.32  | 2.01  | -2.74 | 1.46E-02 | -1.46 | 2.38E-01 | 0.34  | 9.18E-01 | M-2 |
| ENSMMUG00000015395  | PDCD5        | Programmed Cell Death 5                                       | 307.71 | 82.01 | 51.34 | 30.23 | -2.43 | 2.54E-07 | -0.45 | 4.63E-01 | -0.67 | 4.46E-01 | M-2 |
| ENSMMUG00000008041  | ANKRD27      | Ankyrin Repeat Domain 27                                      | 7.06   | 2.88  | 3.61  | 3.20  | -1.62 | 4.64E-02 | 0.42  | 6.83E-01 | -0.10 | 9.72E-01 | M-2 |
| ENSMMUG00000015608  | TDRD12       | Tudor Domain Containing 12                                    | 8.71   | 1.78  | 0.91  | 0.27  | -2.53 | 2.34E-02 | -0.76 | 5.78E-01 | -2.50 | 1.03E-01 | M-2 |
| ENSMMUG00000005879  | KIAA0355     | KIAA0355 Ortholog                                             | 6.37   | 3.32  | 1.95  | 2.65  | -1.52 | 1.76E-02 | -1.10 | 9.96E-02 | 0.66  | 5.84E-01 | M-2 |
| ENSMMUG00000019758  | HCST         | Hematopoietic Cell Signal Transducer                          | 2.14   | 0.44  | 0.32  | 1.06  | -6.77 | 6.70E-03 | 3.09  | 2.92E-01 | -1.68 | 7.80E-01 | M-2 |
| ENSMMUG00000019700  | ALKBH6       | AlkB Homolog 6                                                | 4.16   | 1.35  | 1.53  | 1.76  | -3.89 | 9.53E-03 | -0.39 | 8.60E-01 | -0.68 | 8.62E-01 | M-2 |
| ENSMMUG00000019704  | WDR62        | WD Repeat Domain 62                                           | 4.30   | 0.34  | 0.48  | 2.43  | -5.00 | 2.15E-08 | 0.70  | 5.68E-01 | 1.97  | 1.60E-01 | M-2 |
| ENSMMUG00000011092  | ZNF540       | Zinc Finger Protein 540                                       | 2.37   | 0.47  | 0.18  | 0.27  | -3.55 | 5.74E-03 | -1.27 | 4.24E-01 | 1.20  | 6.82E-01 | M-2 |
| ENSMMUG00000003493  | DPF1         | Double PHD Fingers 1                                          | 2.34   | 0.97  | 0.28  | 0.41  | -2.76 | 3.09E-02 | -1.42 | 3.29E-01 | 0.67  | 8.32E-01 | M-2 |
| ENSMMUG00000014544  | FBXO27       | F-box Protein 27                                              | 2.39   | 0.23  | 0.11  | 0.53  | -3.53 | 2.46E-02 | -1.99 | 2.77E-01 | 3.19  | 1.67E-01 | M-2 |
| ENSMMUG00000003826  | LOC700344    | Zinc Finger Protein 780A                                      | 3.27   | 1.03  | 2.01  | 4.60  | -2.18 | 1.32E-02 | 1.21  | 2.08E-01 | 0.56  | 7.85E-01 | M-2 |
| ENSMMUG00000004813  | RAB4B        | RAB4B, Member RAS Oncogene Family                             | 16.04  | 1.48  | 1.78  | 1.30  | -4.11 | 3.98E-07 | 0.24  | 8.51E-01 | -0.05 | 9.86E-01 | M-2 |
| ENSMMUG00000041041  | DEDD2        | Death Effector Domain Containing 2                            | 19.60  | 4.37  | 0.97  | 1.97  | -2.47 | 5.03E-03 | -1.69 | 6.85E-02 | 0.33  | 8.98E-01 | M-2 |
| ENSMMUG00000046507  | ZNF284       | Zinc Finger Protein 284                                       | 6.03   | 0.49  | 1.59  | 0.47  | -3.87 | 3.22E-05 | 1.68  | 1.08E-01 | -1.13 | 5.33E-01 | M-2 |
| ENSMMUG000000022934 | BLOC1S3      | Biogenesis Of Lysosomal Organelles Complex 1 Subunit 3        | 16.82  | 17.08 | 9.46  | 4.44  | -2.65 | 2.29E-02 | 0.30  | 8.53E-01 | -2.70 | 7.90E-02 | M-2 |
| ENSMMUG000000022940 | OPA3         | OPA3, Outer Mitochondrial Membrane Lipid Metabolism Regulator | 8.04   | 3.26  | 6.12  | 3.03  | -2.45 | 2.32E-02 | 1.38  | 2.42E-01 | -1.71 | 3.04E-01 | M-2 |
| ENSMMUG00000013009  | MEIS3        | Meis Homeobox 3                                               | 9.26   | 2.41  | 0.65  | 0.72  | -2.78 | 3.15E-02 | -2.59 | 5.03E-02 | 0.28  | 9.51E-01 | M-2 |
| ENSMMUG000000022161 | CA11         | Carbonic Anhydrase 11                                         | 1.76   | 1.45  | 0.08  | 0.30  | -5.68 | 1.68E-03 | 0.42  | 8.81E-01 | -0.81 | 8.72E-01 | M-2 |
| ENSMMUG00000010079  | BCAT2        | Branched Chain Amino Acid Transaminase 2                      | 5.14   | 0.92  | 0.88  | 0.43  | -3.51 | 1.77E-02 | -0.92 | 6.23E-01 | 0.89  | 8.05E-01 | M-2 |
| ENSMMUG000000038695 |              |                                                               | 5.46   | 1.24  | 4.19  | 1.58  | -3.20 | 1.49E-02 | 1.01  | 5.33E-01 | -1.49 | 5.44E-01 | M-2 |
| ENSMMUG00000012765  | SIGLEC6      | Sialic Acid Binding Ig Like Lectin 6                          | 4.77   | 0.72  | 0.07  | 0.03  | -5.45 | 7.65E-05 | -2.15 | 2.63E-01 | -2.80 | 2.92E-01 | M-2 |
| ENSMMUG00000002291  | ZNF814       | Zinc Finger Protein 814                                       | 26.02  | 9.48  | 4.56  | 8.13  | -1.55 | 3.55E-02 | -1.32 | 7.69E-02 | 0.95  | 4.44E-01 | M-2 |
| ENSMMUG00000010429  |              |                                                               | 6.78   | 1.25  | 0.61  | 0.37  | -3.85 | 2.92E-05 | -0.48 | 7.14E-01 | -0.99 | 6.12E-01 | M-2 |
| ENSMMUG00000010025  |              |                                                               | 15.87  | 7.75  | 8.74  | 8.86  | -1.86 | 4.40E-02 | -0.02 | 9.88E-01 | 0.24  | 9.32E-01 | M-2 |
| ENSMMUG000000048481 | LILRA3       | Leukocyte Immunoglobulin Like Receptor A3                     | 1.13   | 0.46  | 0.03  | 0.07  | -5.40 | 1.40E-02 | -1.37 | 6.55E-01 | -2.36 | 5.99E-01 | M-2 |
| ENSMMUG000000038191 |              |                                                               | 4.10   | 0.24  | 4.00  | 3.65  | -4.59 | 8.64E-03 | 2.89  | 1.28E-01 | 1.90  | 5.80E-01 | M-2 |
| ENSMMUG000000048887 | LOC106996506 | Sharpin-like                                                  | 5.76   | 0.49  | 1.19  | 8.13  | -3.69 | 9.33E-03 | 1.12  | 5.44E-01 | 1.72  | 4.89E-01 | M-2 |
| ENSMMUG000000048461 |              |                                                               | 22.02  | 8.92  | 13.10 | 11.33 | -1.56 | 1.80E-02 | 1.22  | 7.15E-02 | -0.72 | 5.57E-01 | M-2 |
| ENSMMUG000000038226 |              |                                                               | 5.36   | 1.14  | 3.06  | 1.38  | -2.73 | 2.56E-02 | 2.02  | 1.13E-01 | -1.99 | 2.88E-01 | M-2 |
| ENSMMUG000000045016 |              |                                                               | 9.81   | 3.93  | 0.47  | 0.10  | -4.24 | 2.06E-02 | -3.74 | 7.91E-02 | -1.03 | 8.45E-01 | M-2 |
| ENSMMUG000000038632 |              |                                                               | 85.70  | 20.40 | 36.36 | 19.01 | -2.60 | 9.68E-04 | 1.39  | 1.07E-01 | -2.07 | 5.20E-02 | M-2 |
| ENSMMUG000000009354 | ARHGEF16     | Rho Guanine Nucleotide Exchange Factor 16                     | 5.45   | 1.62  | 0.21  | 1.51  | -3.71 | 1.62E-03 | -2.85 | 2.88E-02 | 0.95  | 7.38E-01 | M-3 |
| ENSMMUG00000010852  | ACTL8        | Actin Like 8                                                  | 697.14 | 84.33 | 13.90 | 2.23  | -3.32 | 2.06E-06 | -3.10 | 1.24E-05 | -1.18 | 3.28E-01 | M-3 |
| ENSMMUG00000004464  | STPG1        | Sperm Tail PG-rich Repeat Containing 1                        | 4.45   | 0.31  | 0.34  | 0.07  | -3.11 | 5.27E-03 | -2.98 | 1.39E-02 | 0.63  | 8.36E-01 | M-3 |
| ENSMMUG00000002968  | SYF2         | SYF2 Pre-mRNA Splicing Factor                                 | 216.79 | 81.10 | 42.79 | 24.36 | -1.35 | 4.55E-03 | -1.58 | 6.16E-04 | -0.02 | 9.92E-01 | M-3 |
| ENSMMUG000000032490 |              |                                                               | 6.75   | 0.57  | 0.56  | 0.23  | -4.42 | 6.62E-03 | -5.80 | 1.35E-03 | 4.38  | 7.90E-02 | M-3 |
| ENSMMUG000000022995 | DAB1         | DAB1, Reelin Adaptor Protein                                  | 3.36   | 0.63  | 0.10  | 0.02  | -2.16 | 3.13E-02 | -3.54 | 2.73E-04 | -1.37 | 4.70E-01 | M-3 |
| ENSMMUG000000021917 | LOC702347    | Leucine-rich Repeat-containing Protein 7                      | 1.66   | 0.33  | 0.13  | 0.16  | -2.83 | 3.74E-02 | -3.59 | 8.48E-03 | 2.55  | 2.09E-01 | M-3 |
| ENSMMUG000000005287 | LHX8         | LIM Homeobox 8                                                | 27.47  | 2.76  | 1.47  | 0.21  | -3.41 | 9.41E-05 | -2.82 | 2.21E-03 | -1.52 | 3.29E-01 | M-3 |
| ENSMMUG000000015403 | MCOLN2       | Mucopolin 2                                                   | 11.55  | 2.27  | 0.35  | 0.16  | -2.32 | 4.60E-02 | -3.27 | 3.59E-03 | -1.39 | 5.07E-01 | M-3 |
| ENSMMUG000000010094 | C1H1orf146   | Chromosome 1 Open Reading Frame, Human C1orf146               | 190.87 | 69.87 | 21.56 | 1.63  | -2.51 | 1.90E-03 | -3.53 | 6.99E-06 | -2.00 | 7.84E-02 | M-3 |
| ENSMMUG000000009431 | HENMT1       | HEN Methyltransferase 1                                       | 21.19  | 6.00  | 0.66  | 0.38  | -1.93 | 4.48E-02 | -3.21 | 4.00E-04 | -1.32 | 4.21E-01 | M-3 |

|                    |          |                                                          |        |        |       |       |       |          |       |          |       |          |     |
|--------------------|----------|----------------------------------------------------------|--------|--------|-------|-------|-------|----------|-------|----------|-------|----------|-----|
| ENSMMUG0000005817  | AMIGO1   | Adhesion Molecule With Ig Like Domain 1                  | 4.75   | 1.91   | 0.43  | 0.27  | -2.76 | 3.56E-02 | -3.86 | 2.85E-03 | 0.43  | 9.07E-01 | M-3 |
| ENSMMUG0000008030  | EPS8L3   | EPS8 Like 3                                              | 15.23  | 9.34   | 0.83  | 0.33  | -2.52 | 2.63E-02 | -3.31 | 2.94E-03 | -1.58 | 4.16E-01 | M-3 |
| ENSMMUG00000019642 | PDZK1    | PDZ Domain Containing 1                                  | 29.66  | 7.51   | 2.72  | 0.66  | -2.37 | 1.69E-02 | -3.24 | 6.83E-04 | -0.42 | 8.75E-01 | M-3 |
| ENSMMUG0000006581  | SHC1     | SHC Adaptor Protein 1                                    | 56.64  | 17.13  | 7.34  | 7.52  | -1.58 | 3.39E-03 | -1.70 | 1.30E-03 | 0.10  | 9.60E-01 | M-3 |
| ENSMMUG0000002005  | ARHGAP30 | Rho GTPase Activating Protein 30                         | 8.50   | 0.76   | 0.07  | 0.11  | -3.61 | 2.85E-03 | -2.63 | 4.59E-02 | -0.63 | 8.53E-01 | M-3 |
| ENSMMUG0000002010  | DEDD     | Death Effector Domain Containing                         | 53.83  | 28.14  | 10.08 | 4.79  | -1.20 | 4.87E-02 | -1.47 | 1.08E-02 | -1.11 | 1.91E-01 | M-3 |
| ENSMMUG0000004789  | NOS1AP   | Nitric Oxide Synthase 1 Adaptor Protein                  | 4.68   | 0.89   | 0.23  | 0.17  | -2.40 | 3.47E-02 | -2.36 | 4.17E-02 | -1.88 | 2.93E-01 | M-3 |
| ENSMMUG0000005873  | DISP1    | Dispatched RND Transporter Family Member 1               | 6.12   | 1.06   | 0.29  | 0.31  | -2.51 | 1.69E-02 | -2.59 | 1.50E-02 | 0.74  | 7.71E-01 | M-3 |
| ENSMMUG00000021227 | RAB29    | RAB29, Member RAS Oncogene Family                        | 18.23  | 4.80   | 2.71  | 0.52  | -2.55 | 4.29E-02 | -2.97 | 2.23E-02 | -0.45 | 9.05E-01 | M-3 |
| ENSMMUG00000038730 | RGS2     | Regulator Of G Protein Signaling 2                       | 479.52 | 85.56  | 20.00 | 9.03  | -2.71 | 6.79E-06 | -2.51 | 3.68E-05 | -0.21 | 9.12E-01 | M-3 |
| ENSMMUG0000008992  | NPL      | N-acetylneuramate Pyruvate Lyase                         | 20.06  | 3.79   | 0.48  | 0.94  | -3.56 | 3.05E-05 | -2.17 | 1.95E-02 | 0.72  | 7.27E-01 | M-3 |
| ENSMMUG00000014498 | CACNA1E  | Calcium Voltage-gated Channel Subunit Alpha1 E           | 15.29  | 4.14   | 0.70  | 0.28  | -3.27 | 4.00E-04 | -3.23 | 5.05E-04 | -0.52 | 8.28E-01 | M-3 |
| ENSMMUG00000019727 | FMO2     | Flavin Containing Monooxygenase 2                        | 11.95  | 1.58   | 2.05  | 0.03  | -4.01 | 4.43E-04 | -3.58 | 5.96E-03 | -1.41 | 6.05E-01 | M-3 |
| ENSMMUG00000015132 | LGALS8   | Galectin 8                                               | 90.01  | 20.45  | 5.07  | 2.55  | -1.89 | 9.63E-03 | -2.54 | 2.67E-04 | -0.87 | 5.08E-01 | M-3 |
| ENSMMUG00000017872 | RIOX2    | Ribosomal Oxygenase 2                                    | 40.55  | 12.13  | 3.85  | 3.13  | -1.94 | 3.98E-04 | -1.90 | 5.40E-04 | 0.27  | 8.53E-01 | M-3 |
| ENSMMUG00000019978 | HHLA2    | HERV-H LTR-associating 2                                 | 7.73   | 1.29   | 0.28  | 0.19  | -2.53 | 4.63E-03 | -2.70 | 2.97E-03 | -0.14 | 9.68E-01 | M-3 |
| ENSMMUG00000018446 | FGD5     | FYVE, RhoGEF And PH Domain Containing 5                  | 4.77   | 0.46   | 0.05  | 0.07  | -3.71 | 3.51E-03 | -4.09 | 2.02E-03 | 1.32  | 6.19E-01 | M-3 |
| ENSMMUG0000008549  | CNTN6    | Contactin 6                                              | 4.99   | 0.60   | 0.36  | 0.03  | -4.19 | 1.28E-03 | -3.49 | 1.51E-02 | -1.37 | 6.36E-01 | M-3 |
| ENSMMUG00000019262 | CACNA1D  | Calcium Voltage-gated Channel Subunit Alpha1 D           | 3.03   | 0.85   | 0.12  | 0.07  | -3.13 | 8.98E-03 | -3.79 | 1.56E-03 | 1.20  | 6.31E-01 | M-3 |
| ENSMMUG00000010514 | SLC6A20  | Solute Carrier Family 6 Member 20                        | 2.62   | 0.99   | 0.10  | 0.33  | -2.30 | 4.15E-02 | -3.33 | 2.32E-03 | 1.80  | 2.97E-01 | M-3 |
| ENSMMUG00000006816 | TRANK1   | Tetratricopeptide Repeat And Ankyrin Repeat Containing 1 | 2.23   | 0.45   | 0.05  | 0.09  | -2.79 | 1.75E-02 | -4.79 | 5.87E-05 | 1.00  | 6.96E-01 | M-3 |
| ENSMMUG00000011577 | PLOD2    | Procollagen-lysine,2-oxoglutarate 5-dioxygenase 2        | 6.16   | 1.55   | 0.32  | 0.17  | -2.43 | 2.13E-02 | -2.37 | 2.70E-02 | -1.97 | 2.24E-01 | M-3 |
| ENSMMUG0000008919  | RAB6B    | RAB6B, Member RAS Oncogene Family                        | 25.85  | 15.67  | 0.35  | 0.36  | -3.29 | 1.22E-02 | -3.18 | 1.95E-02 | -1.50 | 5.57E-01 | M-3 |
| ENSMMUG00000020377 | COL6A5   | Collagen Type VI Alpha 5 Chain                           | 3.66   | 0.87   | 0.08  | 0.04  | -3.13 | 6.69E-03 | -3.27 | 5.70E-03 | -1.77 | 3.81E-01 | M-3 |
| ENSMMUG00000009667 | ZNF385D  | Zinc Finger Protein 385D                                 | 25.37  | 6.23   | 9.33  | 0.35  | -2.38 | 1.92E-02 | -2.79 | 4.78E-03 | -0.82 | 7.06E-01 | M-3 |
| ENSMMUG00000011029 |          |                                                          | #####  | 309.48 | 52.67 | 10.55 | -1.77 | 3.44E-02 | -3.82 | 4.69E-07 | -0.95 | 5.19E-01 | M-3 |
| ENSMMUG00000029983 |          |                                                          | 885.21 | 232.61 | 33.57 | 5.47  | -1.74 | 4.80E-02 | -4.49 | 1.06E-08 | -0.73 | 6.80E-01 | M-3 |
| ENSMMUG00000032303 | SLBP     | Stem-loop Binding Protein                                | 359.38 | 120.09 | 68.26 | 29.44 | -1.56 | 8.14E-03 | -1.80 | 1.67E-03 | -0.14 | 9.45E-01 | M-3 |
| ENSMMUG00000018067 | FAM184B  | Family With Sequence Similarity 184 Member B             | 10.02  | 3.42   | 0.36  | 1.06  | -2.03 | 3.98E-02 | -3.49 | 1.74E-04 | 1.89  | 1.79E-01 | M-3 |
| ENSMMUG00000013071 | UCHL1    | Ubiquitin C-terminal Hydrolase L1                        | 42.40  | 3.80   | 0.90  | 0.28  | -3.53 | 5.32E-07 | -3.40 | 3.48E-06 | -0.83 | 5.82E-01 | M-3 |
| ENSMMUG00000046028 |          |                                                          | 15.68  | 7.12   | 1.58  | 2.17  | -1.49 | 2.89E-02 | -2.55 | 5.67E-05 | 0.18  | 9.31E-01 | M-3 |
| ENSMMUG00000014080 | KLHL8    | Kelch Like Family Member 8                               | 22.99  | 6.12   | 2.01  | 1.38  | -2.43 | 7.25E-04 | -1.55 | 4.15E-02 | 0.36  | 8.53E-01 | M-3 |
| ENSMMUG00000006702 | BMPR1B   | Bone Morphogenetic Protein Receptor Type 1B              | 7.54   | 3.90   | 0.04  | 0.14  | -3.18 | 2.68E-02 | -5.15 | 5.45E-04 | 0.16  | 9.77E-01 | M-3 |
| ENSMMUG00000002211 | DCLK2    | Doublecortin Like Kinase 2                               | 126.34 | 52.81  | 7.32  | 0.54  | -1.84 | 4.45E-02 | -4.38 | 1.11E-07 | -1.48 | 2.86E-01 | M-3 |
| ENSMMUG00000015332 | TMPRSS2  | Transmembrane Protease, Serine 2                         | 19.51  | 2.64   | 0.43  | 0.74  | -3.41 | 2.22E-03 | -3.84 | 5.79E-04 | 0.47  | 8.81E-01 | M-3 |
| ENSMMUG00000010296 | ERG      | ERG, ETS Transcription Factor                            | 2.65   | 1.17   | 0.04  | 0.03  | -4.06 | 1.01E-02 | -6.43 | 8.45E-05 | 2.29  | 4.35E-01 | M-3 |
| ENSMMUG0000003024  | MAP3K7CL | MAP3K7 C-terminal Like                                   | 48.88  | 12.55  | 2.50  | 0.41  | -2.28 | 2.28E-02 | -3.85 | 4.05E-05 | -0.48 | 8.52E-01 | M-3 |
| ENSMMUG00000008723 | JAM2     | Junctional Adhesion Molecule 2                           | 29.10  | 11.06  | 1.08  | 0.10  | -2.59 | 1.32E-02 | -4.18 | 9.42E-05 | -1.50 | 5.12E-01 | M-3 |

|                    |              |                                                                    |        |        |        |       |       |          |       |          |       |          |     |
|--------------------|--------------|--------------------------------------------------------------------|--------|--------|--------|-------|-------|----------|-------|----------|-------|----------|-----|
| ENSMMUG0000006460  | GNA12        | G Protein Subunit Alpha 12                                         | 52.87  | 13.16  | 5.51   | 2.39  | -1.87 | 2.09E-02 | -1.77 | 2.82E-02 | -1.39 | 2.49E-01 | M-3 |
| ENSMMUG00000014753 | FAM220A      | Family With Sequence Similarity 220 Member A                       | 253.31 | 138.73 | 56.60  | 21.05 | -1.88 | 3.12E-02 | -2.22 | 8.23E-03 | 0.90  | 5.79E-01 | M-3 |
| ENSMMUG00000030422 | LOC100424218 | Radial Spoke Head 10 Homolog B-like                                | 8.64   | 3.17   | 0.74   | 0.70  | -3.72 | 2.86E-03 | -2.60 | 4.62E-02 | 0.20  | 9.66E-01 | M-3 |
| ENSMMUG00000041560 |              |                                                                    | 23.05  | 1.24   | 1.15   | 0.07  | -3.85 | 2.72E-05 | -4.28 | 3.33E-05 | -1.27 | 5.09E-01 | M-3 |
| ENSMMUG00000010702 | EEPD1        | Endonuclease/exonuclease/ phosphatase Family Domain Containing 1   | 3.33   | 0.52   | 0.29   | 0.19  | -3.32 | 9.53E-03 | -3.36 | 1.26E-02 | 0.59  | 8.64E-01 | M-3 |
| ENSMMUG00000020787 | PRR15        | Proline Rich 15                                                    | 77.80  | 29.28  | 3.65   | 0.38  | -1.99 | 4.14E-02 | -4.27 | 1.61E-06 | -1.16 | 5.05E-01 | M-3 |
| ENSMMUG00000004839 | IGF2BP3      | Insulin Like Growth Factor 2 MRNA Binding Protein 3                | 363.51 | 124.63 | 11.98  | 18.90 | -1.56 | 3.07E-02 | -3.99 | 7.65E-10 | 1.63  | 8.44E-02 | M-3 |
| ENSMMUG00000045449 |              |                                                                    | 36.20  | 9.13   | 1.83   | 0.59  | -2.07 | 1.13E-03 | -2.33 | 2.08E-04 | -1.54 | 8.89E-02 | M-3 |
| ENSMMUG00000040123 | COL28A1      | Collagen Type XXVIII Alpha 1 Chain                                 | 3.03   | 0.28   | 0.39   | 0.11  | -3.25 | 4.95E-02 | -3.44 | 4.22E-02 | 0.92  | 8.20E-01 | M-3 |
| ENSMMUG00000021730 | SEMA3D       | Semaphorin 3D                                                      | 1.43   | 0.19   | 0.12   | 0.02  | -3.70 | 1.09E-02 | -4.36 | 5.40E-03 | -0.16 | 9.77E-01 | M-3 |
| ENSMMUG00000042946 | CD36         | CD36 Molecule                                                      | 25.24  | 11.73  | 3.41   | 1.91  | -2.89 | 5.95E-03 | -2.77 | 7.99E-03 | 1.35  | 4.70E-01 | M-3 |
| ENSMMUG00000012432 | LRRC17       | Leucine Rich Repeat Containing 17                                  | 12.25  | 2.50   | 2.97   | 1.08  | -3.07 | 3.80E-02 | -4.08 | 4.59E-03 | 2.71  | 2.09E-01 | M-3 |
| ENSMMUG00000046261 | UBE2H        | Ubiquitin Conjugating Enzyme E2 H                                  | 65.62  | 12.82  | 10.29  | 5.13  | -2.19 | 6.52E-03 | -1.94 | 1.64E-02 | -0.07 | 9.81E-01 | M-3 |
| ENSMMUG00000021676 | SVOPL        | SVOPL Like                                                         | 20.89  | 4.58   | 1.11   | 0.40  | -2.86 | 7.21E-03 | -3.13 | 3.14E-03 | -0.11 | 9.78E-01 | M-3 |
| ENSMMUG00000045279 | PRSS1        | Protease, Serine, 1 (trypsin 1)                                    | 15.69  | 2.17   | 0.75   | 0.05  | -3.08 | 2.86E-02 | -4.63 | 1.36E-03 | -0.31 | 9.56E-01 | M-3 |
| ENSMMUG00000016219 | TRPV6        | Transient Receptor Potential Cation Channel Subfamily V Member 6   | 4.29   | 1.60   | 0.40   | 0.78  | -2.55 | 4.80E-02 | -2.95 | 2.44E-02 | 1.53  | 4.97E-01 | M-3 |
| ENSMMUG00000038754 |              |                                                                    | 15.31  | 4.27   | 2.97   | 0.10  | -2.55 | 1.95E-02 | -3.40 | 1.64E-03 | -2.77 | 7.02E-02 | M-3 |
| ENSMMUG00000037502 |              |                                                                    | 7.41   | 3.71   | 0.02   | 0.07  | -4.90 | 5.07E-04 | -3.78 | 3.42E-02 | -1.23 | 7.59E-01 | M-3 |
| ENSMMUG00000013954 | PDZD2        | PDZ Domain Containing 2                                            | 23.28  | 14.15  | 1.70   | 1.22  | -1.48 | 4.21E-02 | -2.29 | 7.08E-04 | -0.96 | 4.21E-01 | M-3 |
| ENSMMUG00000018004 | PLCXD3       | Phosphatidylinositol Specific Phospholipase CX Domain Containing 3 | 2.27   | 0.41   | 0.07   | 0.16  | -5.10 | 1.39E-02 | -4.69 | 3.19E-02 | 4.36  | 1.55E-01 | M-3 |
| ENSMMUG00000014647 | GPBP1        | GC-rich Promoter Binding Protein 1                                 | 135.71 | 64.79  | 40.08  | 17.91 | -1.08 | 1.52E-02 | -0.99 | 2.49E-02 | -0.88 | 1.64E-01 | M-3 |
| ENSMMUG00000005357 | MAST4        | Microtubule Associated Serine/threonine Kinase Family Member 4     | 3.21   | 1.00   | 0.22   | 0.71  | -3.04 | 6.90E-03 | -2.38 | 4.20E-02 | 0.62  | 8.21E-01 | M-3 |
| ENSMMUG00000003143 | THBS4        | Thrombospondin 4                                                   | 69.21  | 15.16  | 0.73   | 0.47  | -1.79 | 2.30E-02 | -4.78 | 3.10E-11 | -0.62 | 7.21E-01 | M-3 |
| ENSMMUG00000011513 | VCAN         | Versican                                                           | 48.71  | 17.20  | 0.33   | 0.33  | -2.69 | 2.84E-02 | -5.41 | 1.50E-06 | 0.22  | 9.60E-01 | M-3 |
| ENSMMUG00000000332 | TGFBI        | Transforming Growth Factor Beta Induced                            | 4.24   | 0.77   | 0.09   | 0.08  | -3.00 | 4.57E-03 | -3.57 | 1.05E-03 | -0.45 | 8.85E-01 | M-3 |
| ENSMMUG00000000342 | TRPC7        | Transient Receptor Potential Cation Channel Subfamily C Member 7   | 16.38  | 3.37   | 0.42   | 0.07  | -2.14 | 4.89E-02 | -4.90 | 2.34E-06 | -0.83 | 7.43E-01 | M-3 |
| ENSMMUG00000000456 | REEP2        | Receptor Accessory Protein 2                                       | 9.55   | 1.86   | 0.17   | 0.08  | -3.55 | 9.89E-05 | -2.88 | 3.86E-03 | -1.74 | 2.92E-01 | M-3 |
| ENSMMUG00000001939 | SIL1         | SIL1 Nucleotide Exchange Factor                                    | 13.97  | 1.86   | 0.57   | 0.88  | -3.07 | 6.85E-03 | -3.22 | 5.69E-03 | 1.84  | 3.29E-01 | M-3 |
| ENSMMUG00000009768 | RNF14        | Ring Finger Protein 14                                             | 30.25  | 9.90   | 5.09   | 6.94  | -1.55 | 4.56E-02 | -1.97 | 7.52E-03 | 1.09  | 3.73E-01 | M-3 |
| ENSMMUG00000013588 | PRELID2      | PRELI Domain Containing 2                                          | 16.92  | 3.06   | 0.16   | 0.32  | -3.62 | 6.53E-03 | -4.46 | 1.41E-03 | 1.13  | 7.06E-01 | M-3 |
| ENSMMUG00000019291 | DPYSL3       | Dihydropyrimidinase Like 3                                         | 7.36   | 2.03   | 0.33   | 2.32  | -2.63 | 4.40E-02 | -3.18 | 1.25E-02 | 2.74  | 1.19E-01 | M-3 |
| ENSMMUG00000022868 | CCDC69       | Coiled-coil Domain Containing 69                                   | 24.93  | 5.03   | 0.77   | 0.72  | -3.36 | 2.16E-03 | -3.18 | 4.58E-03 | -0.49 | 8.71E-01 | M-3 |
| ENSMMUG00000003497 | FAT2         | FAT Atypical Cadherin 2                                            | 2.73   | 0.17   | 0.06   | 0.05  | -4.42 | 7.11E-05 | -3.09 | 1.16E-02 | 1.30  | 5.69E-01 | M-3 |
| ENSMMUG00000010997 | CYFIP2       | Cytoplasmic FMR1 Interacting Protein 2                             | 5.75   | 1.63   | 0.44   | 0.07  | -2.22 | 1.22E-02 | -3.43 | 5.19E-05 | -0.83 | 6.49E-01 | M-3 |
| ENSMMUG00000023077 | PTTG1        | Pituitary Tumor-transforming 1                                     | #####  | 783.59 | 220.15 | 74.65 | -1.34 | 2.65E-02 | -2.56 | 3.39E-06 | -0.45 | 7.30E-01 | M-3 |
| ENSMMUG00000009365 | SPDL1        | Spindle Apparatus Coiled-coil Protein 1                            | 144.47 | 64.39  | 30.00  | 12.73 | -1.14 | 1.46E-02 | -1.70 | 9.92E-05 | -0.41 | 6.68E-01 | M-3 |
| ENSMMUG00000041134 |              |                                                                    | 9.30   | 2.81   | 0.11   | 0.12  | -3.10 | 4.82E-02 | -5.11 | 1.57E-03 | -0.58 | 9.07E-01 | M-3 |

|                     |         |                                                              |        |        |       |       |       |          |       |          |       |          |     |
|---------------------|---------|--------------------------------------------------------------|--------|--------|-------|-------|-------|----------|-------|----------|-------|----------|-----|
| ENSMMUG00000000142  | EIF4E1B | Eukaryotic Translation Initiation Factor 4E Family Member 1B | 159.69 | 35.43  | 6.55  | 3.95  | -2.65 | 4.31E-03 | -3.46 | 1.16E-04 | 0.50  | 8.33E-01 | M-3 |
| ENSMMUG00000002649  | UNC5A   | Unc-5 Netrin Receptor A                                      | 54.38  | 26.67  | 0.87  | 0.39  | -1.84 | 4.28E-02 | -4.13 | 5.64E-07 | -1.98 | 1.09E-01 | M-3 |
| ENSMMUG000000041519 | ZNF354A | Zinc Finger Protein 354A                                     | 26.27  | 7.83   | 7.96  | 3.07  | -2.02 | 1.25E-03 | -1.48 | 2.19E-02 | 0.79  | 4.88E-01 | M-3 |
| ENSMMUG000000018514 | DUSP22  | Dual Specificity Phosphatase 22                              | 6.47   | 1.48   | 0.22  | 0.30  | -2.36 | 4.58E-02 | -2.46 | 4.34E-02 | 1.34  | 5.69E-01 | M-3 |
| ENSMMUG000000020646 | PRL     | Prolactin                                                    | 1.47   | 0.19   | 0.06  | 0.03  | -4.13 | 9.35E-04 | -3.01 | 4.84E-02 | 0.51  | 9.01E-01 | M-3 |
| ENSMMUG000000019252 | TDRD6   | Tudor Domain Containing 6                                    | 19.15  | 8.01   | 2.51  | 2.03  | -1.71 | 2.43E-02 | -1.75 | 1.90E-02 | 0.21  | 9.27E-01 | M-3 |
| ENSMMUG000000037745 |         |                                                              | 108.95 | 28.92  | 2.68  | 3.12  | -2.74 | 1.37E-02 | -3.55 | 1.54E-03 | -0.28 | 9.41E-01 | M-3 |
| ENSMMUG000000011858 | BMP5    | Bone Morphogenetic Protein 5                                 | 8.46   | 1.70   | 0.39  | 0.03  | -2.87 | 4.45E-02 | -4.93 | 8.72E-04 | -0.52 | 9.14E-01 | M-3 |
| ENSMMUG000000012580 | DOPEY1  | Dopey Family Member 1                                        | 62.45  | 16.11  | 1.86  | 2.40  | -1.88 | 2.13E-03 | -3.12 | 9.17E-08 | 0.08  | 9.73E-01 | M-3 |
| ENSMMUG000000009736 | BACH2   | BTB Domain And CNC Homolog 2                                 | 3.89   | 0.58   | 0.31  | 0.01  | -2.97 | 1.34E-02 | -3.10 | 1.05E-02 | -3.07 | 6.81E-02 | M-3 |
| ENSMMUG000000005929 | USP45   | Ubiquitin Specific Peptidase 45                              | 20.58  | 6.46   | 2.56  | 1.01  | -1.99 | 2.32E-03 | -1.43 | 3.48E-02 | -1.56 | 8.44E-02 | M-3 |
| ENSMMUG000000008120 | CRYBG1  | Crystallin Beta-gamma Domain Containing 1                    | 2.42   | 1.11   | 0.43  | 0.32  | -3.45 | 9.30E-04 | -4.36 | 8.43E-05 | 0.56  | 8.41E-01 | M-3 |
| ENSMMUG000000021936 | FBXO30  | F-box Protein 30                                             | 62.27  | 24.34  | 8.81  | 7.60  | -2.03 | 1.69E-03 | -2.01 | 1.79E-03 | -0.05 | 9.84E-01 | M-3 |
| ENSMMUG000000044958 | ADGRG6  | Adhesion G Protein-coupled Receptor G6                       | 8.50   | 2.50   | 0.74  | 0.14  | -2.36 | 1.13E-02 | -1.96 | 3.90E-02 | -1.88 | 1.66E-01 | M-3 |
| ENSMMUG000000022136 | LAMA2   | Laminin Subunit Alpha 2                                      | 2.88   | 0.66   | 0.58  | 0.07  | -2.99 | 4.98E-03 | -3.83 | 3.90E-04 | 0.21  | 9.58E-01 | M-3 |
| ENSMMUG000000008526 | ASF1A   | Anti-silencing Function 1A Histone Chaperone                 | 618.45 | 214.69 | 58.34 | 19.45 | -1.67 | 1.69E-02 | -2.63 | 5.60E-05 | -0.34 | 8.44E-01 | M-3 |
| ENSMMUG000000012582 | WISP3   | WNT1 Inducible Signaling Pathway Protein 3                   | 6.01   | 2.84   | 0.11  | 0.12  | -3.34 | 4.74E-02 | -5.89 | 9.55E-04 | 0.92  | 8.42E-01 | M-3 |
| ENSMMUG000000014294 | PATL2   | PAT1 Homolog 2                                               | 94.31  | 22.62  | 3.06  | 0.45  | -2.19 | 1.89E-02 | -5.05 | 3.87E-09 | -0.38 | 8.81E-01 | M-3 |
| ENSMMUG000000020694 | RAB27A  | RAB27A, Member RAS Oncogene Family                           | 8.87   | 0.85   | 0.29  | 0.25  | -4.44 | 5.06E-06 | -2.94 | 6.10E-03 | 1.06  | 6.18E-01 | M-3 |
| ENSMMUG000000043132 |         |                                                              | 38.85  | 5.86   | 1.77  | 0.79  | -1.98 | 1.89E-02 | -2.07 | 1.46E-02 | -0.03 | 9.93E-01 | M-3 |
| ENSMMUG000000009160 | UBE2Q2  | Ubiquitin Conjugating Enzyme E2 Q2                           | 138.44 | 45.71  | 14.55 | 6.86  | -1.80 | 2.59E-02 | -2.42 | 1.57E-03 | 0.07  | 9.80E-01 | M-3 |
| ENSMMUG000000011328 | CPEB1   | Cytoplasmic Polyadenylation Element Binding Protein 1        | 26.97  | 2.42   | 2.80  | 0.31  | -3.34 | 4.21E-06 | -3.77 | 3.89E-07 | -0.80 | 6.09E-01 | M-3 |
| ENSMMUG000000043910 |         |                                                              | 15.05  | 4.35   | 1.99  | 0.94  | -1.93 | 5.89E-03 | -1.59 | 3.10E-02 | -0.49 | 7.74E-01 | M-3 |
| ENSMMUG000000016250 | TTC5    | Tetratricopeptide Repeat Domain 5                            | 14.60  | 2.92   | 0.45  | 0.56  | -2.36 | 2.90E-02 | -3.70 | 2.57E-04 | 1.65  | 3.31E-01 | M-3 |
| ENSMMUG000000014839 | NPAS3   | Neuronal PAS Domain Protein 3                                | 4.43   | 0.86   | 0.46  | 0.07  | -3.24 | 1.87E-02 | -3.09 | 3.28E-02 | -0.86 | 8.02E-01 | M-3 |
| ENSMMUG000000010315 | SAMD4A  | Sterile Alpha Motif Domain Containing 4A                     | 20.20  | 4.20   | 0.64  | 0.10  | -2.40 | 5.29E-04 | -3.76 | 4.38E-08 | -1.53 | 1.64E-01 | M-3 |
| ENSMMUG000000004084 | GCH1    | GTP Cyclohydrolase 1                                         | 50.27  | 12.68  | 3.31  | 3.34  | -2.11 | 1.45E-02 | -1.77 | 4.49E-02 | -0.02 | 9.96E-01 | M-3 |
| ENSMMUG000000042895 | SYT16   | Synaptotagmin 16                                             | 1.81   | 0.11   | 0.01  | 0.03  | -4.05 | 4.18E-04 | -3.96 | 3.41E-03 | 1.66  | 5.28E-01 | M-3 |
| ENSMMUG000000015869 | RDH12   | Retinol Dehydrogenase 12 (all-trans/9-cis/11-cis)            | 64.55  | 18.68  | 0.87  | 0.58  | -2.08 | 1.50E-02 | -4.29 | 8.80E-08 | -0.45 | 8.37E-01 | M-3 |
| ENSMMUG000000020196 | NUMB    | NUMB, Endocytic Adaptor Protein                              | 92.44  | 40.01  | 15.29 | 13.37 | -1.42 | 4.49E-02 | -1.58 | 2.06E-02 | 0.46  | 7.71E-01 | M-3 |
| ENSMMUG000000020664 | FLRT2   | Fibronectin Leucine Rich Transmembrane Protein 2             | 23.39  | 7.69   | 1.33  | 0.50  | -1.93 | 2.71E-02 | -4.29 | 8.62E-08 | -0.10 | 9.74E-01 | M-3 |
| ENSMMUG000000013768 | ARHGEF6 | Rac/Cdc42 Guanine Nucleotide Exchange Factor 6               | 4.84   | 0.66   | 0.08  | 0.07  | -2.43 | 3.42E-02 | -2.87 | 1.52E-02 | -0.19 | 9.65E-01 | M-3 |
| ENSMMUG000000046587 |         |                                                              | 7.80   | 3.09   | 0.07  | 0.13  | -4.47 | 1.36E-02 | -3.81 | 4.94E-02 | -1.59 | 7.01E-01 | M-3 |
| ENSMMUG000000002034 |         |                                                              | 455.71 | 87.66  | 11.42 | 1.54  | -2.74 | 1.54E-04 | -4.28 | 2.60E-09 | -1.69 | 1.29E-01 | M-3 |
| ENSMMUG000000002811 | SNTG1   | Syntrophin Gamma 1                                           | 12.23  | 1.28   | 0.04  | 0.10  | -3.29 | 1.33E-02 | -7.81 | 1.38E-07 | 3.32  | 1.29E-01 | M-3 |
| ENSMMUG000000015236 | MOS     | MOS Proto-oncogene, Serine/threonine Kinase                  | 40.85  | 4.98   | 0.49  | 0.11  | -3.30 | 1.82E-03 | -4.07 | 1.65E-04 | -0.99 | 7.03E-01 | M-3 |
| ENSMMUG000000045546 | PLAG1   | PLAG1 Zinc Finger                                            | 19.28  | 5.41   | 2.10  | 1.71  | -2.12 | 1.40E-02 | -1.83 | 3.59E-02 | 0.50  | 8.10E-01 | M-3 |
| ENSMMUG000000013974 | MYBL1   | MYB Proto-oncogene Like 1                                    | 11.37  | 2.95   | 0.59  | 1.50  | -2.19 | 2.60E-02 | -2.29 | 1.86E-02 | 1.07  | 5.54E-01 | M-3 |
| ENSMMUG000000020010 | CDH17   | Cadherin 17                                                  | 7.39   | 0.63   | 0.74  | 0.26  | -3.47 | 6.34E-03 | -2.81 | 3.33E-02 | -0.40 | 9.17E-01 | M-3 |
| ENSMMUG000000021112 | ESRP1   | Epithelial Splicing Regulatory Protein 1                     | 326.79 | 162.10 | 86.35 | 48.78 | -1.11 | 9.93E-03 | -0.99 | 2.19E-02 | -0.56 | 4.50E-01 | M-3 |

|                     |           |                                                                        |        |        |        |       |       |          |       |          |       |          |     |
|---------------------|-----------|------------------------------------------------------------------------|--------|--------|--------|-------|-------|----------|-------|----------|-------|----------|-----|
| ENSMMUG00000014183  | PLEKHF2   | Pleckstrin Homology And FYVE Domain Containing 2                       | 58.92  | 13.67  | 21.91  | 9.37  | -2.06 | 6.69E-03 | -1.91 | 1.18E-02 | -0.12 | 9.67E-01 | M-3 |
| ENSMMUG00000020996  | NCALD     | Neurocalcin Delta                                                      | 9.17   | 1.97   | 0.71   | 0.07  | -3.29 | 5.19E-03 | -3.19 | 7.92E-03 | -1.71 | 4.32E-01 | M-3 |
| ENSMMUG00000001087  |           |                                                                        | 9.85   | 4.26   | 1.13   | 0.62  | -2.21 | 1.90E-02 | -2.37 | 1.23E-02 | 0.70  | 7.44E-01 | M-3 |
| ENSMMUG00000015297  | CD69      | CD69 Molecule                                                          | 5.05   | 0.52   | 0.03   | 0.03  | -4.58 | 4.51E-03 | -4.07 | 2.26E-02 | 1.96  | 5.55E-01 | M-3 |
| ENSMMUG00000014778  | SLC16A7   | Solute Carrier Family 16 Member 7                                      | 1.79   | 0.22   | 0.08   | 0.02  | -3.42 | 3.84E-02 | -3.89 | 2.49E-02 | -1.41 | 6.99E-01 | M-3 |
| ENSMMUG00000011579  | FAM19A2   | Family With Sequence Similarity 19 Member A2, C-C Motif Chemokine Like | 25.44  | 8.01   | 1.54   | 0.26  | -2.56 | 3.50E-02 | -3.81 | 8.85E-04 | -0.68 | 8.14E-01 | M-3 |
| ENSMMUG00000018237  | PLXNC1    | Plexin C1                                                              | 17.44  | 4.23   | 1.16   | 0.55  | -1.85 | 1.83E-02 | -3.38 | 3.71E-06 | 0.85  | 5.60E-01 | M-3 |
| ENSMMUG00000049210  |           |                                                                        | 10.30  | 1.29   | 0.39   | 0.10  | -2.85 | 6.16E-03 | -2.66 | 1.29E-02 | -1.79 | 2.93E-01 | M-3 |
| ENSMMUG00000021808  | CRY1      | Cryptochrome Circadian Regulator 1                                     | 31.77  | 7.52   | 5.05   | 2.06  | -2.14 | 2.77E-02 | -2.28 | 1.63E-02 | 0.77  | 7.01E-01 | M-3 |
| ENSMMUG00000042728  | MYO1H     | Myosin IH                                                              | 8.55   | 2.37   | 0.47   | 0.21  | -2.90 | 1.26E-03 | -2.41 | 1.09E-02 | -1.70 | 2.51E-01 | M-3 |
| ENSMMUG00000005629  | PIWIL1    | Piwi Like RNA-mediated Gene Silencing 1                                | 58.82  | 7.89   | 7.52   | 0.49  | -3.74 | 1.60E-04 | -3.04 | 2.81E-03 | -0.53 | 8.40E-01 | M-3 |
| ENSMMUG00000019891  | LOC722485 | Prostaglandin F Synthase 1-like                                        | 51.10  | 20.92  | 1.02   | 0.21  | -3.10 | 5.95E-04 | -4.17 | 8.03E-06 | -1.56 | 3.40E-01 | M-3 |
| ENSMMUG00000017442  | TUBAL3    | Tubulin Alpha Like 3                                                   | 39.55  | 4.26   | 0.15   | 0.14  | -4.38 | 2.65E-05 | -4.77 | 8.31E-05 | -0.32 | 9.34E-01 | M-3 |
| ENSMMUG00000048865  |           |                                                                        | 3.26   | 1.72   | 0.18   | 0.05  | -1.83 | 4.89E-02 | -4.03 | 2.58E-06 | -1.24 | 4.35E-01 | M-3 |
| ENSMMUG00000000242  | PPP1R3C   | Protein Phosphatase 1 Regulatory Subunit 3C                            | 15.32  | 4.18   | 0.83   | 0.42  | -3.05 | 1.07E-02 | -4.27 | 2.00E-04 | 0.91  | 7.33E-01 | M-3 |
| ENSMMUG00000011789  | HHEX      | Hematopoietically Expressed Homeobox                                   | 144.55 | 18.26  | 7.02   | 2.25  | -3.79 | 2.69E-04 | -2.52 | 2.08E-02 | -0.18 | 9.64E-01 | M-3 |
| ENSMMUG00000016689  | CCNJ      | Cyclin J                                                               | 181.99 | 50.93  | 26.41  | 9.22  | -1.94 | 3.18E-03 | -1.84 | 4.95E-03 | -0.44 | 7.80E-01 | M-3 |
| ENSMMUG000000003610 | SORCS3    | Sortilin Related VPS10 Domain Containing Receptor 3                    | 3.01   | 0.90   | 0.29   | 0.06  | -2.70 | 1.29E-02 | -2.51 | 2.56E-02 | -2.61 | 8.45E-02 | M-3 |
| ENSMMUG00000009661  | ADAM12    | ADAM Metallopeptidase Domain 12                                        | 6.18   | 0.94   | 0.12   | 0.02  | -3.52 | 3.23E-03 | -4.00 | 1.88E-03 | -1.74 | 4.80E-01 | M-3 |
| ENSMMUG00000011976  | DHCR7     | 7-dehydrocholesterol Reductase                                         | 28.30  | 13.28  | 1.77   | 4.12  | -2.20 | 2.70E-02 | -2.19 | 2.56E-02 | -0.26 | 9.31E-01 | M-3 |
| ENSMMUG00000015018  | CD5       | CD5 Molecule                                                           | 5.40   | 3.51   | 0.03   | 0.05  | -3.96 | 7.34E-03 | -4.39 | 7.45E-03 | -1.67 | 6.32E-01 | M-3 |
| ENSMMUG00000000022  | ZP1       | Zona Pellucida Glycoprotein 1                                          | 38.44  | 12.85  | 0.34   | 0.14  | -3.47 | 2.97E-04 | -3.29 | 1.20E-03 | -2.73 | 5.07E-02 | M-3 |
| ENSMMUG00000042410  |           |                                                                        | #####  | 754.02 | 200.18 | 10.22 | -2.17 | 1.27E-02 | -3.12 | 1.39E-04 | -1.62 | 2.02E-01 | M-3 |
| ENSMMUG00000010273  | FAM111B   | Family With Sequence Similarity 111 Member B                           | 11.81  | 2.25   | 0.36   | 0.28  | -2.67 | 2.60E-02 | -3.70 | 1.37E-03 | -0.04 | 9.93E-01 | M-3 |
| ENSMMUG00000042331  | LOC701437 | Glycine N-acyltransferase-like Protein 1                               | 16.10  | 2.64   | 0.28   | 0.28  | -2.58 | 2.40E-03 | -4.64 | 2.65E-08 | 0.85  | 6.37E-01 | M-3 |
| ENSMMUG00000010982  | RTN4RL2   | Reticulon 4 Receptor Like 2                                            | 6.16   | 0.70   | 0.11   | 0.34  | -3.72 | 2.10E-03 | -3.08 | 2.27E-02 | 1.29  | 6.19E-01 | M-3 |
| ENSMMUG00000017814  | PRG3      | Proteoglycan 3, Pro Eosinophil Major Basic Protein 2                   | 29.24  | 3.30   | 1.41   | 0.31  | -3.67 | 8.41E-03 | -4.10 | 4.32E-03 | -0.06 | 9.92E-01 | M-3 |
| ENSMMUG00000004332  | TRIM44    | Tripartite Motif Containing 44                                         | 63.45  | 20.69  | 6.63   | 2.43  | -2.15 | 1.31E-02 | -2.38 | 4.81E-03 | -0.85 | 6.15E-01 | M-3 |
| ENSMMUG00000014614  | LDHAL6A   | Lactate Dehydrogenase A Like 6A                                        | 126.04 | 35.67  | 15.55  | 1.08  | -2.71 | 5.45E-03 | -2.82 | 3.24E-03 | -1.15 | 5.19E-01 | M-3 |
| ENSMMUG00000015785  | AMPD3     | Adenosine Monophosphate Deaminase 3                                    | 17.57  | 11.01  | 0.98   | 0.16  | -3.36 | 3.56E-03 | -3.12 | 8.17E-03 | -1.89 | 3.25E-01 | M-3 |
| ENSMMUG00000008585  | NLRP14    | NLR Family Pyrin Domain Containing 14                                  | 160.58 | 50.52  | 3.44   | 0.71  | -2.69 | 1.16E-03 | -3.98 | 6.12E-07 | -1.99 | 8.45E-02 | M-3 |
| ENSMMUG00000007999  | CCDC82    | Coiled-coil Domain Containing 82                                       | 24.55  | 5.42   | 2.49   | 2.26  | -2.34 | 7.02E-03 | -2.13 | 1.45E-02 | 1.12  | 4.65E-01 | M-3 |
| ENSMMUG00000019419  | PIH1D2    | PIH1 Domain Containing 2                                               | 9.18   | 3.71   | 1.76   | 0.44  | -2.23 | 2.30E-02 | -3.26 | 5.98E-04 | -1.27 | 4.54E-01 | M-3 |
| ENSMMUG00000022347  | GRIK4     | Glutamate Ionotropic Receptor Kainate Type Subunit 4                   | 9.43   | 2.55   | 1.43   | 0.07  | -2.62 | 3.20E-02 | -4.26 | 1.89E-04 | -0.38 | 9.15E-01 | M-3 |
| ENSMMUG000000039895 |           |                                                                        | 13.36  | 1.99   | 1.09   | 1.73  | -2.90 | 5.86E-04 | -2.16 | 1.33E-02 | 1.42  | 2.97E-01 | M-3 |
| ENSMMUG00000023092  |           |                                                                        | 48.06  | 19.08  | 1.57   | 0.72  | -2.04 | 1.25E-02 | -3.27 | 2.90E-05 | -1.64 | 1.83E-01 | M-3 |
| ENSMMUG00000000300  | ITGA4     | Integrin Subunit Alpha 4                                               | 16.14  | 1.55   | 0.48   | 0.12  | -3.65 | 1.55E-04 | -3.06 | 2.62E-03 | -0.48 | 8.62E-01 | M-3 |
| ENSMMUG00000008334  | GPR1      | G Protein-coupled Receptor 1                                           | 36.78  | 7.54   | 2.08   | 0.99  | -2.47 | 2.45E-02 | -2.89 | 6.92E-03 | -1.61 | 3.78E-01 | M-3 |

|                    |          |                                                                            |        |        |       |       |       |          |       |          |       |          |     |
|--------------------|----------|----------------------------------------------------------------------------|--------|--------|-------|-------|-------|----------|-------|----------|-------|----------|-----|
| ENSMMUG00000014813 | ABCA12   | ATP Binding Cassette Subfamily A Member 12                                 | 2.42   | 1.83   | 0.16  | 0.21  | -3.55 | 7.41E-03 | -3.78 | 6.83E-03 | -0.21 | 9.67E-01 | M-3 |
| ENSMMUG00000013400 | CXCR2    | C-X-C Motif Chemokine Receptor 2                                           | 7.82   | 3.57   | 0.13  | 0.03  | -3.45 | 4.89E-03 | -3.43 | 7.34E-03 | -3.20 | 7.85E-02 | M-3 |
| ENSMMUG00000017926 |          |                                                                            | 2.98   | 1.26   | 1.52  | 0.12  | -5.65 | 2.69E-02 | -6.55 | 1.21E-02 | 6.31  | 6.76E-02 | M-3 |
| ENSMMUG00000006159 | WDFY1    | WD Repeat And FYVE Domain Containing 1                                     | 38.78  | 14.33  | 2.81  | 4.25  | -1.82 | 4.51E-02 | -2.93 | 6.03E-04 | 0.55  | 7.97E-01 | M-3 |
| ENSMMUG00000012546 |          |                                                                            | 225.90 | 46.71  | 9.35  | 1.65  | -2.09 | 4.95E-03 | -3.59 | 3.23E-07 | -1.06 | 4.06E-01 | M-3 |
| ENSMMUG00000003797 | USP20    | Ubiquitin Specific Peptidase 20                                            | 5.97   | 2.34   | 0.47  | 1.25  | -2.28 | 8.10E-03 | -2.25 | 9.23E-03 | -0.01 | 9.99E-01 | M-3 |
| ENSMMUG00000047960 | SVEP1    | Sushi, Von Willebrand Factor Type A, EGF And Pentraxin Domain Containing 1 | 3.18   | 1.38   | 0.16  | 0.12  | -1.99 | 4.89E-02 | -2.91 | 2.38E-03 | -0.84 | 6.87E-01 | M-3 |
| ENSMMUG00000015093 | VLDLR    | Very Low Density Lipoprotein Receptor                                      | 36.94  | 7.74   | 2.91  | 0.90  | -2.55 | 2.04E-03 | -3.54 | 1.00E-05 | -2.11 | 6.10E-02 | M-3 |
| ENSMMUG00000002357 | TMEM2    | Transmembrane Protein 2                                                    | 38.93  | 11.22  | 4.10  | 5.08  | -1.82 | 4.52E-02 | -2.92 | 4.86E-04 | 2.05  | 8.10E-02 | M-3 |
| ENSMMUG00000044996 |          |                                                                            | 138.54 | 27.36  | 6.92  | 0.46  | -3.11 | 1.95E-02 | -3.03 | 2.38E-02 | -1.54 | 5.42E-01 | M-3 |
| ENSMMUG00000018045 | IAH1     | Isoamyl Acetate Hydrolyzing Esterase 1 (putative)                          | 355.47 | 68.06  | 13.53 | 12.52 | -2.40 | 3.49E-04 | -3.61 | 2.66E-08 | 0.96  | 4.19E-01 | M-3 |
| ENSMMUG00000012340 | WDCP     | WD Repeat And Coiled Coil Containing                                       | 32.64  | 10.31  | 2.48  | 1.54  | -1.61 | 1.31E-02 | -1.66 | 9.43E-03 | -0.51 | 7.17E-01 | M-3 |
| ENSMMUG00000019732 | MAPRE3   | Microtubule Associated Protein RP/EB Family Member 3                       | 11.33  | 4.55   | 1.82  | 0.58  | -2.74 | 1.73E-02 | -2.42 | 4.56E-02 | -0.30 | 9.37E-01 | M-3 |
| ENSMMUG00000030890 |          |                                                                            | 2.02   | 0.33   | 0.01  | 0.02  | -3.11 | 4.63E-02 | -4.94 | 3.24E-03 | 0.18  | 9.76E-01 | M-3 |
| ENSMMUG00000008352 | PLB1     | Phospholipase B1                                                           | 5.19   | 1.34   | 0.14  | 0.13  | -2.56 | 2.78E-02 | -3.20 | 5.40E-03 | -0.30 | 9.39E-01 | M-3 |
| ENSMMUG00000004324 | TOGARAM2 | TOG Array Regulator Of Axonemal Microtubules 2                             | 8.63   | 0.83   | 0.07  | 0.02  | -3.31 | 1.65E-03 | -2.85 | 1.39E-02 | -2.82 | 1.29E-01 | M-3 |
| ENSMMUG00000010226 | MXD1     | MAX Dimerization Protein 1                                                 | 138.44 | 30.56  | 19.98 | 1.53  | -2.30 | 4.13E-03 | -3.03 | 8.07E-05 | -0.95 | 5.19E-01 | M-3 |
| ENSMMUG00000006330 | PAIP2B   | Poly(A) Binding Protein Interacting Protein 2B                             | 31.92  | 5.71   | 2.28  | 1.19  | -2.72 | 4.86E-04 | -2.34 | 3.62E-03 | 0.44  | 8.30E-01 | M-3 |
| ENSMMUG00000007176 | DYSF     | Dysferlin                                                                  | 1.84   | 0.65   | 0.43  | 0.34  | -3.42 | 4.70E-02 | -3.99 | 2.21E-02 | -1.19 | 7.57E-01 | M-3 |
| ENSMMUG00000009871 | NPAS2    | Neuronal PAS Domain Protein 2                                              | 15.36  | 2.60   | 1.13  | 0.06  | -3.04 | 1.31E-02 | -2.92 | 2.04E-02 | -2.05 | 3.18E-01 | M-3 |
| ENSMMUG00000009912 | FGF9     | Fibroblast Growth Factor 9                                                 | 5.34   | 0.38   | 0.42  | 0.03  | -3.95 | 2.30E-02 | -5.27 | 6.46E-03 | -0.01 | 9.99E-01 | M-3 |
| ENSMMUG00000009030 | MTIF3    | Mitochondrial Translational Initiation Factor 3                            | 303.58 | 72.19  | 25.84 | 26.92 | -2.38 | 8.30E-05 | -1.47 | 2.17E-02 | 0.40  | 7.94E-01 | M-3 |
| ENSMMUG00000038997 | ZAR1L    | Zygotarrest 1 Like                                                         | 34.42  | 1.70   | 0.86  | 0.19  | -4.74 | 9.00E-10 | -2.36 | 6.63E-03 | -1.16 | 4.68E-01 | M-3 |
| ENSMMUG00000038911 |          |                                                                            | 11.98  | 7.18   | 0.65  | 0.05  | -3.35 | 3.08E-03 | -3.45 | 8.18E-03 | -2.87 | 1.16E-01 | M-3 |
| ENSMMUG00000002113 | NHLRC3   | NHL Repeat Containing 3                                                    | 42.95  | 12.70  | 3.55  | 2.74  | -1.89 | 2.15E-02 | -2.78 | 3.48E-04 | 0.58  | 7.53E-01 | M-3 |
| ENSMMUG00000017688 | RCBTB2   | RCC1 And BTB Domain Containing Protein 2                                   | 5.47   | 0.70   | 0.15  | 0.17  | -3.29 | 2.47E-03 | -2.72 | 1.67E-02 | 1.51  | 4.50E-01 | M-3 |
| ENSMMUG00000002875 | FGF14    | Fibroblast Growth Factor 14                                                | 37.33  | 8.84   | 2.58  | 0.24  | -3.39 | 3.29E-03 | -3.58 | 1.97E-03 | -0.70 | 8.12E-01 | M-3 |
| ENSMMUG00000016292 | PHACTR3  | Phosphatase And Actin Regulator 3                                          | 52.42  | 17.37  | 1.63  | 0.28  | -2.01 | 3.92E-02 | -3.61 | 7.20E-05 | -2.35 | 7.67E-02 | M-3 |
| ENSMMUG00000000070 | AURKA    | Aurora Kinase A                                                            | 673.81 | 177.60 | 85.07 | 25.42 | -1.70 | 7.39E-03 | -1.81 | 3.71E-03 | -0.44 | 7.61E-01 | M-3 |
| ENSMMUG00000007883 | RIPOR3   | RIPOR Family Member 3                                                      | 26.18  | 3.70   | 0.22  | 0.08  | -2.69 | 1.59E-03 | -4.38 | 2.36E-07 | -1.06 | 5.41E-01 | M-3 |
| ENSMMUG00000012020 | NCOA3    | Nuclear Receptor Coactivator 3                                             | 305.42 | 127.08 | 39.81 | 18.40 | -1.54 | 2.41E-02 | -1.95 | 2.64E-03 | -0.57 | 6.84E-01 | M-3 |
| ENSMMUG00000010603 | ADA      | Adenosine Deaminase                                                        | 67.44  | 19.95  | 3.33  | 1.86  | -2.67 | 1.92E-03 | -2.07 | 1.91E-02 | -0.97 | 5.54E-01 | M-3 |
| ENSMMUG00000001108 | PTPRT    | Protein Tyrosine Phosphatase, Receptor Type T                              | 2.06   | 0.78   | 0.07  | 0.06  | -2.70 | 3.60E-02 | -2.96 | 2.94E-02 | -0.70 | 8.45E-01 | M-3 |
| ENSMMUG00000005904 | ZHX3     | Zinc Fingers And Homeoboxes 3                                              | 33.12  | 16.28  | 0.34  | 0.36  | -2.68 | 8.49E-03 | -3.99 | 5.34E-05 | -1.33 | 4.64E-01 | M-3 |
| ENSMMUG00000047879 | FAM110A  | Family With Sequence Similarity 110 Member A                               | 15.96  | 4.05   | 0.39  | 0.56  | -2.56 | 3.79E-02 | -2.95 | 1.79E-02 | -0.88 | 7.60E-01 | M-3 |
| ENSMMUG00000013259 | PCNA     | Proliferating Cell Nuclear Antigen                                         | 210.45 | 77.87  | 55.43 | 30.41 | -1.24 | 1.40E-02 | -1.23 | 1.34E-02 | -0.42 | 6.87E-01 | M-3 |
| ENSMMUG00000046199 | YPEL1    | Yippee Like 1                                                              | 57.69  | 22.66  | 6.49  | 1.59  | -2.07 | 3.09E-02 | -2.56 | 5.42E-03 | -0.14 | 9.67E-01 | M-3 |

|                    |           |                                                                |        |        |       |      |       |          |       |          |       |          |     |
|--------------------|-----------|----------------------------------------------------------------|--------|--------|-------|------|-------|----------|-------|----------|-------|----------|-----|
| ENSMMUG00000005451 | NEFH      | Neurofilament Heavy                                            | 137.04 | 83.73  | 6.83  | 1.89 | -1.48 | 3.13E-02 | -4.85 | 1.24E-15 | -0.73 | 5.62E-01 | M-3 |
| ENSMMUG00000018854 |           |                                                                | 3.86   | 1.29   | 0.07  | 0.05 | -2.82 | 4.40E-02 | -3.45 | 1.55E-02 | -2.39 | 3.66E-01 | M-3 |
| ENSMMUG00000014203 | PARVG     | Parvin Gamma                                                   | 12.70  | 5.33   | 0.15  | 0.10 | -3.10 | 1.46E-02 | -4.19 | 1.46E-03 | -2.62 | 2.22E-01 | M-3 |
| ENSMMUG00000021177 | CLEC10A   | C-type Lectin Domain Containing 10A                            | 41.92  | 16.53  | 1.01  | 0.13 | -2.41 | 4.82E-02 | -4.47 | 8.03E-05 | -0.90 | 7.51E-01 | M-3 |
| ENSMMUG00000022712 |           |                                                                | 94.99  | 40.62  | 2.92  | 3.61 | -1.80 | 2.91E-02 | -3.90 | 4.96E-07 | -0.45 | 8.32E-01 | M-3 |
| ENSMMUG00000022740 | TOB1      | Transducer Of ERBB2, 1                                         | 65.36  | 17.70  | 19.36 | 6.47 | -1.75 | 3.79E-02 | -1.69 | 4.28E-02 | 0.17  | 9.53E-01 | M-3 |
| ENSMMUG00000014755 | DHX58     | DExH-box Helicase 58                                           | 4.99   | 0.53   | 0.04  | 0.07 | -3.43 | 1.02E-02 | -4.98 | 5.45E-04 | 1.41  | 6.25E-01 | M-3 |
| ENSMMUG00000001329 | BRCA1     | BRCA1, DNA Repair Associated                                   | 31.52  | 16.07  | 4.11  | 7.84 | -1.07 | 1.26E-02 | -2.07 | 1.68E-07 | 0.74  | 2.48E-01 | M-3 |
| ENSMMUG00000004122 | MAPT      | Microtubule Associated Protein Tau                             | 5.53   | 0.77   | 0.34  | 0.10 | -2.98 | 1.93E-03 | -2.31 | 2.19E-02 | -0.38 | 8.97E-01 | M-3 |
| ENSMMUG00000009692 |           |                                                                | 17.70  | 5.09   | 1.23  | 0.92 | -2.22 | 2.72E-02 | -3.45 | 3.82E-04 | 0.86  | 6.93E-01 | M-3 |
| ENSMMUG00000048903 | AMZ2      | Archaelysin Family Metallopeptidase 2                          | 20.05  | 7.17   | 1.21  | 1.12 | -2.05 | 8.72E-04 | -2.59 | 2.11E-05 | 0.16  | 9.38E-01 | M-3 |
| ENSMMUG00000042240 |           |                                                                | 89.70  | 14.47  | 0.63  | 0.42 | -2.86 | 2.62E-02 | -4.96 | 1.08E-04 | -0.41 | 9.22E-01 | M-3 |
| ENSMMUG00000016759 | ZP2       | Zona Pellucida Glycoprotein 2                                  | 692.82 | 236.57 | 14.44 | 2.75 | -2.30 | 2.26E-03 | -4.59 | 8.08E-11 | -1.56 | 1.58E-01 | M-3 |
| ENSMMUG00000016876 | ITGAL     | Integrin Subunit Alpha L                                       | 2.26   | 0.61   | 0.09  | 0.03 | -2.84 | 2.41E-02 | -2.71 | 3.42E-02 | -1.88 | 3.77E-01 | M-3 |
| ENSMMUG00000008657 | AKTIP     | AKT Interacting Protein                                        | 123.29 | 24.27  | 5.52  | 3.40 | -1.87 | 2.66E-02 | -2.99 | 1.49E-04 | -0.98 | 5.14E-01 | M-3 |
| ENSMMUG00000014618 | NDRG4     | NDRG Family Member 4                                           | 9.60   | 2.35   | 0.44  | 0.70 | -2.76 | 8.01E-03 | -2.64 | 1.11E-02 | 0.85  | 7.01E-01 | M-3 |
| ENSMMUG00000012438 | PABPN1L   | Poly(A) Binding Protein Nuclear 1 Like, Cytoplasmic            | 31.02  | 4.82   | 1.16  | 0.10 | -3.56 | 2.64E-03 | -3.01 | 1.65E-02 | -1.52 | 5.58E-01 | M-3 |
| ENSMMUG00000017546 | EMILIN2   | Elastin Microfibril Interfacer 2                               | 231.44 | 69.63  | 10.75 | 1.49 | -2.21 | 1.62E-03 | -3.43 | 2.99E-07 | -1.79 | 5.85E-02 | M-3 |
| ENSMMUG00000004328 | CCDC178   | Coiled-coil Domain Containing 178                              | 36.44  | 14.44  | 21.26 | 9.45 | -1.54 | 1.10E-02 | -2.27 | 7.93E-05 | 1.25  | 1.47E-01 | M-3 |
| ENSMMUG00000017290 | MAPK4     | Mitogen-activated Protein Kinase 4                             | 6.77   | 1.99   | 0.81  | 0.04 | -2.60 | 1.79E-02 | -4.70 | 1.43E-05 | -1.18 | 5.90E-01 | M-3 |
| ENSMMUG00000016619 | LOC701920 | Serpin Peptidase Inhibitor, Clade B (ovalbumin), Member 6-like | 15.57  | 3.60   | 1.79  | 2.92 | -2.28 | 2.51E-02 | -2.68 | 7.09E-03 | 2.04  | 1.59E-01 | M-3 |
| ENSMMUG00000010417 | CBLN2     | Cerebellin 2 Precursor                                         | 15.68  | 4.98   | 0.53  | 0.06 | -2.26 | 3.77E-02 | -5.06 | 6.22E-07 | -1.82 | 2.89E-01 | M-3 |
| ENSMMUG00000002912 | TLE6      | Transducin Like Enhancer Of Split 6                            | 18.06  | 2.35   | 0.84  | 0.47 | -2.85 | 2.17E-04 | -2.25 | 5.40E-03 | -1.41 | 2.68E-01 | M-3 |
| ENSMMUG00000003555 | CACNA1A   | Calcium Voltage-gated Channel Subunit Alpha 1 A                | 19.49  | 5.59   | 0.78  | 0.22 | -2.59 | 1.31E-03 | -2.61 | 1.26E-03 | -1.82 | 1.18E-01 | M-3 |
| ENSMMUG00000012277 | FCHO1     | FCH Domain Only 1                                              | 66.25  | 32.41  | 1.89  | 0.34 | -2.20 | 2.68E-02 | -4.92 | 8.30E-08 | -1.77 | 2.36E-01 | M-3 |
| ENSMMUG00000012280 | B3GNT3    | UDP-GlcNAc:betaGal Beta-1,3-N-acetylglucosaminyltransferase 3  | 29.20  | 8.11   | 0.53  | 0.14 | -2.45 | 1.89E-02 | -4.37 | 1.20E-05 | -1.57 | 3.93E-01 | M-3 |
| ENSMMUG00000003622 | CNTD2     | Cyclin N-terminal Domain Containing 2                          | 13.77  | 2.94   | 0.68  | 0.28 | -2.45 | 3.92E-02 | -2.57 | 2.84E-02 | 0.08  | 9.86E-01 | M-3 |
| ENSMMUG00000009145 | AXL       | AXL Receptor Tyrosine Kinase                                   | 1.35   | 0.54   | 0.00  | 0.04 | -4.38 | 3.13E-02 | -4.56 | 3.80E-02 | 4.45  | 1.44E-01 | M-3 |
| ENSMMUG00000044206 |           |                                                                | 6.06   | 0.41   | 0.50  | 0.04 | -4.58 | 8.91E-03 | -4.16 | 3.44E-02 | 2.68  | 4.26E-01 | M-3 |
| ENSMMUG00000002471 |           |                                                                | 11.32  | 2.35   | 0.17  | 0.21 | -3.26 | 2.93E-02 | -3.75 | 1.76E-02 | -0.47 | 9.25E-01 | M-3 |
| ENSMMUG00000009278 | C5AR1     | Complement C5a Receptor 1                                      | 112.06 | 21.92  | 2.60  | 0.36 | -2.35 | 1.63E-02 | -5.32 | 3.70E-09 | -0.85 | 6.74E-01 | M-3 |
| ENSMMUG00000028710 | NLRP5     | NLR Family Pyrin Domain Containing 5                           | 128.38 | 19.15  | 2.39  | 0.78 | -3.81 | 2.08E-07 | -2.93 | 1.11E-04 | -1.66 | 1.44E-01 | M-3 |
| ENSMMUG00000041740 |           |                                                                | 26.10  | 7.84   | 0.82  | 0.21 | -3.07 | 9.09E-03 | -3.50 | 3.04E-03 | -1.40 | 5.42E-01 | M-3 |
| ENSMMUG00000005921 | KIF21B    | Kinesin Family Member 21B                                      | 6.52   | 20.95  | 0.69  | 0.25 | 0.71  | 6.50E-01 | -3.50 | 3.34E-03 | -4.14 | 4.82E-03 | M-4 |
| ENSMMUG00000043415 |           |                                                                | 52.76  | 43.42  | 11.47 | 1.99 | -0.87 | 5.36E-01 | -2.83 | 1.49E-02 | -3.20 | 3.53E-02 | M-4 |
| ENSMMUG00000020918 |           |                                                                | 20.19  | 5.45   | 0.59  | 0.06 | -1.87 | 1.64E-01 | -2.60 | 4.69E-02 | -3.78 | 3.74E-02 | M-4 |
| ENSMMUG00000001074 | ULK4      | Unc-51 Like Kinase 4                                           | 21.66  | 44.97  | 9.14  | 1.90 | 0.78  | 2.89E-01 | -2.22 | 3.50E-04 | -2.46 | 7.99E-04 | M-4 |
| ENSMMUG00000001107 | IGSF10    | Immunoglobulin Superfamily Member 10                           | 34.31  | 18.18  | 1.65  | 0.17 | -1.55 | 1.09E-01 | -3.09 | 3.53E-04 | -2.61 | 2.13E-02 | M-4 |
| ENSMMUG00000002366 | LOC704787 | Glutamate Receptor Ionotropic, Delta-2                         | 5.96   | 6.95   | 2.45  | 0.06 | -0.67 | 6.32E-01 | -2.84 | 1.02E-02 | -3.71 | 7.23E-03 | M-4 |
| ENSMMUG00000023256 | LEF1      | Lymphoid Enhancer Binding Factor 1                             | 16.28  | 32.65  | 3.92  | 0.09 | 0.25  | 9.05E-01 | -4.08 | 2.37E-03 | -4.36 | 1.08E-02 | M-4 |
| ENSMMUG00000022642 |           |                                                                | 157.39 | 163.37 | 26.40 | 1.63 | -0.33 | 8.01E-01 | -3.63 | 2.54E-05 | -2.48 | 3.19E-02 | M-4 |

|                     |           |                                                                         |        |        |       |      |       |          |        |          |        |          |     |
|---------------------|-----------|-------------------------------------------------------------------------|--------|--------|-------|------|-------|----------|--------|----------|--------|----------|-----|
| ENSMMUG00000000915  | LOC705702 | Leucine-rich Repeat And Guanylate Kinase Domain-containing Protein      | 33.28  | 39.88  | 1.76  | 0.31 | -0.63 | 5.59E-01 | -4.52  | 2.16E-08 | -2.25  | 4.88E-02 | M-4 |
| ENSMMUG00000004598  |           |                                                                         | 29.95  | 18.43  | 6.04  | 0.62 | -0.46 | 6.56E-01 | -2.78  | 2.26E-04 | -2.52  | 8.33E-03 | M-4 |
| ENSMMUG00000006244  | NUB1      | Negative Regulator Of Ubiquitin Like Proteins 1                         | 59.80  | 37.80  | 19.73 | 4.48 | -0.58 | 4.19E-01 | -1.53  | 1.13E-02 | -1.71  | 2.52E-02 | M-4 |
| ENSMMUG000000047309 |           |                                                                         | 2.04   | 13.69  | 0.10  | 0.00 | 1.08  | 6.70E-01 | -7.57  | 1.68E-04 | -16.46 | 5.29E-15 | M-4 |
| ENSMMUG000000011130 | TRIM36    | Tripartite Motif Containing 36                                          | 56.43  | 43.19  | 12.16 | 0.75 | -0.83 | 3.88E-01 | -3.13  | 5.29E-05 | -2.30  | 2.46E-02 | M-4 |
| ENSMMUG000000013648 | KCNK16    | Potassium Two Pore Domain Channel Subfamily K Member 16                 | 20.47  | 32.42  | 2.41  | 0.10 | -0.28 | 8.73E-01 | -5.08  | 6.06E-06 | -3.32  | 4.13E-02 | M-4 |
| ENSMMUG000000015038 | UNC13C    | Unc-13 Homolog C                                                        | 3.23   | 4.80   | 0.48  | 0.11 | 0.11  | 9.41E-01 | -2.88  | 2.75E-03 | -2.85  | 2.58E-02 | M-4 |
| ENSMMUG000000016564 | HCN4      | Hyperpolarization Activated Cyclic Nucleotide Gated Potassium Channel 4 | 7.52   | 9.34   | 1.88  | 0.06 | -0.61 | 7.15E-01 | -4.35  | 3.18E-04 | -3.46  | 3.54E-02 | M-4 |
| ENSMMUG000000013670 | ADAMTSL3  | ADAMTS Like 3                                                           | 12.00  | 8.45   | 0.88  | 0.23 | -0.56 | 6.66E-01 | -2.82  | 3.95E-03 | -2.86  | 2.28E-02 | M-4 |
| ENSMMUG000000038729 |           |                                                                         | 5.66   | 1.77   | 0.07  | 0.00 | -3.17 | 2.37E-01 | -5.15  | 4.45E-02 | -14.91 | 1.66E-08 | M-4 |
| ENSMMUG000000021579 | DRP2      | Dystrophin Related Protein 2                                            | 7.11   | 8.38   | 1.13  | 0.18 | -0.09 | 9.48E-01 | -1.95  | 2.41E-02 | -2.98  | 3.24E-03 | M-4 |
| ENSMMUG000000029010 | RNF122    | Ring Finger Protein 122                                                 | 156.74 | 106.47 | 17.76 | 1.13 | -0.64 | 5.73E-01 | -4.08  | 2.10E-06 | -2.74  | 1.76E-02 | M-4 |
| ENSMMUG000000010745 | RSP02     | R-spondin 2                                                             | 35.60  | 17.28  | 3.63  | 0.26 | -1.49 | 1.55E-01 | -2.93  | 1.67E-03 | -3.07  | 8.21E-03 | M-4 |
| ENSMMUG000000047483 |           |                                                                         | 2.19   | 1.70   | 0.07  | 0.00 | -4.40 | 2.33E-01 | -15.25 | 1.82E-06 | -11.69 | 3.74E-03 | M-4 |
| ENSMMUG000000004172 | TULP3     | Tubby Like Protein 3                                                    | 22.19  | 16.95  | 3.53  | 1.41 | -0.49 | 6.19E-01 | -2.37  | 1.81E-03 | -2.05  | 4.49E-02 | M-4 |
| ENSMMUG000000006347 | STAB2     | Stabilin 2                                                              | 8.84   | 4.68   | 0.57  | 0.20 | -1.28 | 1.95E-01 | -2.94  | 6.83E-04 | -2.36  | 4.27E-02 | M-4 |
| ENSMMUG000000012840 | HVCN1     | Hydrogen Voltage Gated Channel 1                                        | 7.06   | 9.68   | 0.12  | 0.01 | 1.38  | 4.22E-01 | -6.37  | 8.46E-06 | -5.32  | 8.83E-03 | M-4 |
| ENSMMUG000000042237 |           |                                                                         | 0.60   | 1.83   | 0.10  | 0.00 | 3.87  | 2.70E-01 | -22.85 | 8.86E-16 | -9.43  | 1.65E-02 | M-4 |
| ENSMMUG000000003747 | CNNM2     | Cyclin And CBS Domain Divalent Metal Cation Transport Mediator 2        | 198.48 | 209.04 | 38.70 | 3.86 | -0.07 | 9.57E-01 | -3.53  | 1.35E-05 | -2.26  | 4.12E-02 | M-4 |
| ENSMMUG000000005512 | CCDC87    | Coiled-coil Domain Containing 87                                        | 6.77   | 2.52   | 0.37  | 0.04 | -2.20 | 1.05E-01 | -3.35  | 9.62E-03 | -3.72  | 2.95E-02 | M-4 |
| ENSMMUG000000018316 | HRASLS5   | HRAS Like Suppressor Family Member 5                                    | 14.42  | 6.69   | 0.54  | 0.04 | -1.41 | 3.26E-01 | -3.90  | 1.76E-03 | -4.48  | 6.89E-03 | M-4 |
| ENSMMUG000000020430 | LUZP2     | Leucine Zipper Protein 2                                                | 28.47  | 28.74  | 6.40  | 0.12 | -0.11 | 9.43E-01 | -4.07  | 6.34E-06 | -2.70  | 2.70E-02 | M-4 |
| ENSMMUG000000006375 | CCDC15    | Coiled-coil Domain Containing 15                                        | 46.12  | 21.25  | 6.95  | 0.79 | -1.53 | 7.34E-02 | -1.73  | 3.61E-02 | -2.81  | 3.13E-03 | M-4 |
| ENSMMUG000000048333 | HYLS1     | HYLS1, Centriolar And Ciliogenesis Associated                           | 43.83  | 42.04  | 11.64 | 2.47 | -0.06 | 9.58E-01 | -1.80  | 1.73E-02 | -2.01  | 3.78E-02 | M-4 |
| ENSMMUG000000043816 |           |                                                                         | 228.49 | 170.54 | 19.49 | 0.67 | -1.03 | 4.16E-01 | -4.42  | 1.37E-05 | -3.12  | 2.30E-02 | M-4 |
| ENSMMUG000000014396 | FRZB      | Frizzled Related Protein                                                | 73.09  | 90.90  | 14.07 | 0.44 | -0.84 | 5.47E-01 | -4.83  | 4.94E-06 | -3.79  | 4.20E-03 | M-4 |
| ENSMMUG000000041782 |           |                                                                         | 2.07   | 1.65   | 0.11  | 0.02 | -2.81 | 4.19E-01 | -16.09 | 1.52E-08 | -12.98 | 1.29E-04 | M-4 |
| ENSMMUG000000016731 | CCDC171   | Coiled-coil Domain Containing 171                                       | 6.52   | 7.24   | 1.73  | 0.26 | 0.19  | 8.80E-01 | -2.24  | 6.17E-03 | -2.70  | 6.89E-03 | M-4 |
| ENSMMUG000000019761 | GNA14     | G Protein Subunit Alpha 14                                              | 38.09  | 23.00  | 2.72  | 0.46 | -1.52 | 2.15E-01 | -3.99  | 1.80E-04 | -3.28  | 2.43E-02 | M-4 |
| ENSMMUG000000010272 | SLC30A3   | Solute Carrier Family 30 Member 3                                       | 5.59   | 5.96   | 1.99  | 0.15 | -0.04 | 9.79E-01 | -2.45  | 1.94E-02 | -3.61  | 4.03E-03 | M-4 |
| ENSMMUG000000046375 |           |                                                                         | 2.08   | 1.17   | 0.03  | 0.00 | -3.40 | 2.98E-01 | -6.39  | 3.64E-02 | -12.30 | 2.69E-04 | M-4 |
| ENSMMUG000000048609 |           |                                                                         | 21.85  | 2.75   | 2.11  | 0.01 | -3.02 | 5.76E-02 | -4.07  | 1.37E-02 | -4.76  | 3.50E-02 | M-4 |
| ENSMMUG000000009995 | ALOX15B   | Arachidonate 15-lipoxygenase, Type B                                    | 3.30   | 33.54  | 0.07  | 0.00 | 0.99  | 7.06E-01 | -22.03 | 1.03E-30 | -13.79 | 4.48E-10 | M-4 |
| ENSMMUG000000041445 |           |                                                                         | 2.06   | 0.55   | 2.73  | 0.00 | -4.26 | 8.07E-02 | -14.95 | 1.05E-10 | -12.36 | 2.98E-06 | M-4 |
| ENSMMUG000000019226 | CASKIN1   | CASK Interacting Protein 1                                              | 1.28   | 1.12   | 0.10  | 0.02 | -1.43 | 3.58E-01 | -2.92  | 4.22E-02 | -4.39  | 1.60E-02 | M-4 |
| ENSMMUG000000015689 | ADGRG1    | Adhesion G Protein-coupled Receptor G1                                  | 9.53   | 6.37   | 0.21  | 0.06 | -1.47 | 2.00E-01 | -4.46  | 8.52E-06 | -2.95  | 3.79E-02 | M-4 |
| ENSMMUG000000015690 | ADGRG3    | Adhesion G Protein-coupled Receptor G3                                  | 6.44   | 29.02  | 4.09  | 0.23 | 2.09  | 1.74E-01 | -3.19  | 2.51E-02 | -3.80  | 4.17E-02 | M-4 |
| ENSMMUG000000006862 | FHOD3     | Formin Homology 2 Domain Containing 3                                   | 52.43  | 34.92  | 3.46  | 0.19 | -1.06 | 2.97E-01 | -3.59  | 1.92E-05 | -3.39  | 9.19E-04 | M-4 |
| ENSMMUG000000032205 | ODF3L2    | Outer Dense Fiber Of Sperm Tails 3 Like 2                               | 8.31   | 2.68   | 0.96  | 0.01 | -2.80 | 5.84E-02 | -3.64  | 1.32E-02 | -4.09  | 4.74E-02 | M-4 |
| ENSMMUG000000004616 | PLAUR     | Plasminogen Activator, Urokinase Receptor                               | 23.07  | 31.22  | 4.62  | 0.25 | -0.24 | 8.64E-01 | -3.33  | 1.98E-04 | -3.74  | 8.48E-04 | M-4 |



|                    |          |                                                                   |        |        |       |       |       |          |       |          |        |          |     |
|--------------------|----------|-------------------------------------------------------------------|--------|--------|-------|-------|-------|----------|-------|----------|--------|----------|-----|
| ENSMMUG00000022163 | SLC1A5   | Solute Carrier Family 1 Member 5                                  | 62.62  | 77.21  | 22.05 | 5.45  | 0.16  | 9.15E-01 | -2.02 | 4.00E-02 | -2.53  | 4.12E-02 | M-4 |
| ENSMMUG00000009290 | ZNF416   | Zinc Finger Protein 416                                           | 16.30  | 21.64  | 10.00 | 1.16  | 0.17  | 8.85E-01 | -2.13 | 3.86E-03 | -2.11  | 2.58E-02 | M-4 |
| ENSMMUG00000028711 | NLRP4    | NLR Family Pyrin Domain Containing 4                              | #####  | 434.03 | 21.52 | 4.27  | -1.53 | 5.18E-02 | -4.32 | 4.91E-10 | -2.14  | 2.29E-02 | M-4 |
| ENSMMUG00000021447 | TNFRSF1B | TNF Receptor Superfamily Member 1B                                | 6.76   | 1.17   | 0.43  | 0.05  | -3.68 | 6.06E-03 | -1.05 | 5.38E-01 | -3.97  | 3.31E-02 | M-5 |
| ENSMMUG00000018170 | THEMIS2  | Thymocyte Selection Associated Family Member 2                    | 6.69   | 6.86   | 0.43  | 0.05  | -2.82 | 2.72E-02 | -2.30 | 1.03E-01 | -5.02  | 1.75E-03 | M-5 |
| ENSMMUG00000008158 | CD247    | CD247 Molecule                                                    | 9.84   | 6.60   | 5.11  | 0.09  | -5.44 | 1.55E-03 | 0.30  | 9.19E-01 | -6.30  | 7.59E-03 | M-5 |
| ENSMMUG00000023463 | MAEL     | Maelstrom Spermatogenic Transposon Silencer                       | 183.70 | 61.25  | 41.37 | 1.86  | -1.94 | 6.22E-03 | -1.08 | 1.59E-01 | -2.93  | 2.21E-04 | M-5 |
| ENSMMUG00000023393 | LYAR     | Ly1 Antibody Reactive                                             | 36.11  | 11.15  | 14.20 | 4.71  | -1.48 | 7.65E-04 | 0.26  | 6.62E-01 | -1.83  | 2.97E-04 | M-5 |
| ENSMMUG00000017834 |          |                                                                   | 8.39   | 2.52   | 0.96  | 0.04  | -4.18 | 2.70E-04 | -1.61 | 2.50E-01 | -4.27  | 8.61E-03 | M-5 |
| ENSMMUG00000010788 | ABCB1    | ATP Binding Cassette Subfamily B Member 1                         | 8.32   | 0.50   | 1.47  | 0.17  | -3.90 | 2.27E-05 | 1.42  | 1.85E-01 | -3.96  | 3.73E-04 | M-5 |
| ENSMMUG00000015240 | GRM8     | Glutamate Metabotropic Receptor 8                                 | 7.64   | 2.44   | 0.53  | 0.07  | -2.79 | 1.57E-02 | -1.97 | 1.14E-01 | -3.44  | 3.07E-02 | M-5 |
| ENSMMUG00000007720 | SYCP2L   | Synaptonemal Complex Protein 2 Like                               | 10.62  | 3.72   | 0.84  | 0.05  | -2.94 | 1.94E-02 | -1.88 | 1.74E-01 | -4.74  | 2.63E-03 | M-5 |
| ENSMMUG00000002558 | STMND1   | Stathmin Domain Containing 1                                      | 18.72  | 1.98   | 1.32  | 0.02  | -3.06 | 2.16E-02 | -1.37 | 3.78E-01 | -4.45  | 1.24E-02 | M-5 |
| ENSMMUG00000002867 | TFAP2D   | Transcription Factor AP-2 Delta                                   | 28.04  | 11.74  | 1.85  | 0.16  | -2.63 | 1.60E-02 | -2.10 | 6.36E-02 | -3.14  | 2.72E-02 | M-5 |
| ENSMMUG00000044497 |          |                                                                   | 60.09  | 13.72  | 3.20  | 0.28  | -4.66 | 1.56E-04 | -0.59 | 7.44E-01 | -6.42  | 3.70E-05 | M-5 |
| ENSMMUG00000001423 | FAM214A  | Family With Sequence Similarity 214 Member A                      | 57.65  | 22.83  | 16.11 | 4.06  | -1.65 | 2.39E-02 | 0.01  | 9.96E-01 | -2.19  | 1.20E-02 | M-5 |
| ENSMMUG00000037526 | LRR1     | Leucine Rich Repeat Protein 1                                     | 27.43  | 10.30  | 9.61  | 6.10  | -1.43 | 1.31E-03 | 0.03  | 9.67E-01 | -1.20  | 4.36E-02 | M-5 |
| ENSMMUG00000003567 | DLGAP5   | DLG Associated Protein 5                                          | 306.73 | 109.16 | 97.04 | 29.62 | -1.32 | 7.85E-03 | -0.09 | 9.00E-01 | -1.91  | 6.18E-04 | M-5 |
| ENSMMUG00000042055 |          |                                                                   | 3.48   | 0.33   | 0.34  | 0.00  | -9.83 | 7.00E-04 | 5.74  | 7.30E-02 | -36.93 | 3.99E-38 | M-5 |
| ENSMMUG00000006710 |          |                                                                   | 33.70  | 6.21   | 1.66  | 0.18  | -3.29 | 1.17E-02 | -2.66 | 5.72E-02 | -3.66  | 4.80E-02 | M-5 |
| ENSMMUG00000001781 | LRRC23   | Leucine Rich Repeat Containing 23                                 | 5.42   | 2.96   | 0.49  | 0.02  | -3.53 | 1.33E-02 | -1.29 | 4.72E-01 | -5.11  | 8.60E-03 | M-5 |
| ENSMMUG00000000415 | SCN8A    | Sodium Voltage-gated Channel Alpha Subunit 8                      | 1.15   | 2.00   | 0.66  | 0.11  | -3.68 | 4.05E-03 | -0.45 | 8.11E-01 | -4.55  | 3.01E-03 | M-5 |
| ENSMMUG00000021329 | NAV3     | Neuron Navigator 3                                                | 12.45  | 2.51   | 0.57  | 0.17  | -3.58 | 3.89E-04 | -1.74 | 1.25E-01 | -3.47  | 7.64E-03 | M-5 |
| ENSMMUG00000009655 | FANK1    | Fibronectin Type III And Ankyrin Repeat Domains 1                 | 6.95   | 5.10   | 0.87  | 0.15  | -2.76 | 3.15E-02 | 0.06  | 9.78E-01 | -4.96  | 1.53E-03 | M-5 |
| ENSMMUG00000004330 | PAMR1    | Peptidase Domain Containing Associated With Muscle Regeneration 1 | 1.00   | 0.25   | 0.02  | 0.00  | -5.78 | 8.56E-03 | 0.20  | 9.56E-01 | -8.31  | 2.94E-03 | M-5 |
| ENSMMUG00000041563 |          |                                                                   | 44.48  | 12.81  | 4.91  | 0.21  | -2.65 | 1.42E-02 | -1.76 | 1.21E-01 | -2.83  | 4.16E-02 | M-5 |
| ENSMMUG00000004885 | QSOX2    | Quiescin Sulfhydryl Oxidase 2                                     | 11.20  | 8.19   | 8.68  | 6.35  | -2.20 | 4.79E-02 | 1.40  | 2.37E-01 | -3.56  | 4.67E-03 | M-5 |
| ENSMMUG00000047670 |          |                                                                   | 60.75  | 0.91   | 0.46  | 0.13  | -6.99 | 1.37E-16 | 0.04  | 9.79E-01 | -3.01  | 2.69E-02 | M-5 |
| ENSMMUG00000000498 | PAPOLG   | Poly(A) Polymerase Gamma                                          | 39.52  | 18.30  | 21.85 | 10.57 | -1.17 | 1.40E-02 | 0.43  | 4.35E-01 | -1.62  | 3.31E-03 | M-5 |
| ENSMMUG00000016553 | SLC12A5  | Solute Carrier Family 12 Member 5                                 | 5.30   | 2.62   | 1.16  | 0.05  | -5.27 | 9.37E-05 | 0.42  | 8.39E-01 | -6.28  | 1.04E-04 | M-5 |
| ENSMMUG00000031231 | DEFB116  | Defensin Beta 116                                                 | 16.35  | 2.48   | 6.87  | 0.01  | -5.52 | 2.14E-02 | -1.68 | 5.84E-01 | -18.52 | 1.29E-13 | M-5 |
| ENSMMUG00000013261 | CDS2     | CDP-diacylglycerol Synthase 2                                     | 48.06  | 8.76   | 11.44 | 2.91  | -2.87 | 4.90E-05 | 1.12  | 1.63E-01 | -2.58  | 3.16E-03 | M-5 |
| ENSMMUG00000015139 | SEPT3    | Septin 3                                                          | 7.28   | 1.80   | 4.05  | 0.07  | -3.06 | 3.04E-02 | 2.67  | 6.94E-02 | -7.01  | 1.77E-05 | M-5 |
| ENSMMUG00000043990 |          |                                                                   | 5.97   | 0.97   | 0.12  | 0.00  | -8.70 | 1.66E-04 | 4.97  | 5.53E-02 | -23.47 | 2.89E-22 | M-5 |
| ENSMMUG00000013529 | CDH19    | Cadherin 19                                                       | 9.35   | 2.66   | 1.54  | 0.19  | -2.82 | 2.25E-03 | -0.32 | 8.13E-01 | -2.75  | 2.34E-02 | M-5 |
| ENSMMUG00000023699 | PLIN5    | Perilipin 5                                                       | 4.12   | 0.14   | 1.40  | 0.01  | -4.70 | 3.10E-02 | -0.21 | 9.53E-01 | -19.93 | 1.48E-19 | M-5 |
| ENSMMUG00000011311 | TSPAN16  | Tetraspanin 16                                                    | 2.29   | 3.34   | 0.17  | 0.03  | -5.57 | 4.66E-03 | 1.17  | 6.63E-01 | -7.99  | 9.88E-04 | M-5 |
| ENSMMUG00000011317 | RAB3D    | RAB3D, Member RAS Oncogene Family                                 | 6.39   | 3.10   | 0.86  | 0.17  | -2.60 | 4.44E-02 | -0.69 | 6.81E-01 | -4.32  | 7.31E-03 | M-5 |
| ENSMMUG00000028766 | LGALS4   | Galectin 4                                                        | 5.00   | 0.82   | 0.91  | 0.10  | -5.33 | 1.47E-03 | 2.23  | 2.64E-01 | -6.86  | 1.48E-03 | M-5 |
| ENSMMUG00000009787 | RCN3     | Reticulocalbin 3                                                  | 15.38  | 1.75   | 0.25  | 0.16  | -4.53 | 9.41E-06 | -0.52 | 7.39E-01 | -3.95  | 7.04E-03 | M-5 |
| ENSMMUG00000008029 | GSTM3    | Glutathione S-transferase Mu 3                                    | 42.66  | 10.43  | 1.20  | 0.20  | -2.47 | 1.07E-03 | -2.42 | 1.79E-03 | -3.38  | 4.23E-04 | M-6 |

|                     |           |                                                                    |        |        |       |      |       |          |        |          |        |          |     |
|---------------------|-----------|--------------------------------------------------------------------|--------|--------|-------|------|-------|----------|--------|----------|--------|----------|-----|
| ENSMMUG0000004907   | FAM46C    | Family With Sequence Similarity 46 Member C                        | 119.77 | 36.64  | 12.17 | 0.84 | -2.04 | 3.11E-02 | -2.55  | 4.76E-03 | -2.78  | 1.34E-02 | M-6 |
| ENSMMUG00000012736  | LOC702823 | Histone H1oo                                                       | 143.39 | 18.89  | 1.18  | 0.39 | -4.82 | 1.08E-07 | -2.36  | 1.98E-02 | -2.79  | 3.24E-02 | M-6 |
| ENSMMUG00000012574  | ITPR1     | Inositol 1,4,5-trisphosphate Receptor Type 1                       | 75.10  | 17.93  | 3.42  | 0.74 | -2.35 | 1.91E-04 | -1.89  | 3.28E-03 | -2.49  | 8.61E-04 | M-6 |
| ENSMMUG00000003079  | FBXW12    | F-box And WD Repeat Domain Containing 12                           | 34.50  | 12.08  | 0.73  | 0.08 | -2.90 | 1.63E-02 | -3.95  | 9.31E-04 | -3.75  | 2.18E-02 | M-6 |
| ENSMMUG00000006704  | ZAR1      | Zygote Arrest 1                                                    | 39.37  | 5.93   | 1.04  | 0.21 | -4.26 | 4.98E-05 | -2.52  | 3.07E-02 | -3.40  | 1.80E-02 | M-6 |
| ENSMMUG00000003637  | ZP3       | Zona Pellucida Glycoprotein 3                                      | 545.07 | 35.37  | 7.87  | 1.48 | -4.36 | 3.76E-09 | -2.50  | 1.55E-03 | -2.41  | 1.73E-02 | M-6 |
| ENSMMUG00000023470  | GNAI1     | G Protein Subunit Alpha 11                                         | 113.32 | 47.27  | 23.88 | 2.53 | -1.90 | 2.10E-02 | -1.76  | 3.29E-02 | -2.80  | 3.34E-03 | M-6 |
| ENSMMUG00000041148  |           |                                                                    | 9.29   | 2.33   | 15.04 | 0.00 | -6.51 | 3.81E-03 | -11.67 | 4.42E-07 | -21.03 | 6.97E-20 | M-6 |
| ENSMMUG00000041887  |           |                                                                    | 4.18   | 4.07   | 0.06  | 0.00 | -9.40 | 7.44E-04 | -8.20  | 6.37E-03 | -12.42 | 2.00E-04 | M-6 |
| ENSMMUG00000022251  | TGM7      | Transglutaminase 7                                                 | 36.44  | 41.43  | 0.95  | 0.36 | -2.18 | 4.46E-02 | -3.85  | 1.68E-04 | -2.82  | 4.85E-02 | M-6 |
| ENSMMUG00000007646  | SLC35F4   | Solute Carrier Family 35 Member F4                                 | 24.79  | 10.76  | 3.18  | 0.10 | -2.62 | 7.60E-03 | -3.09  | 1.78E-03 | -3.96  | 1.42E-03 | M-6 |
| ENSMMUG00000018330  | CYP2C18   | Cytochrome P450, Family 2, Subfamily C, Polypeptide 18             | 29.68  | 16.30  | 1.74  | 0.31 | -2.39 | 1.43E-02 | -2.86  | 2.56E-03 | -2.56  | 4.30E-02 | M-6 |
| ENSMMUG00000019693  | ACCSL     | 1-aminocyclopropane-1-carboxylate Synthase Homolog (inactive) Like | 478.06 | 174.17 | 24.74 | 1.86 | -1.82 | 2.65E-02 | -4.17  | 1.90E-08 | -2.23  | 2.60E-02 | M-6 |
| ENSMMUG00000007289  | MFS6      | Major Facilitator Superfamily Domain Containing 6                  | 8.79   | 4.02   | 0.58  | 0.09 | -2.50 | 2.47E-02 | -3.15  | 4.04E-03 | -2.95  | 4.53E-02 | M-6 |
| ENSMMUG00000018907  | ERFE      | Erythroferrone                                                     | 123.79 | 31.75  | 5.12  | 0.77 | -2.25 | 4.31E-03 | -2.41  | 1.88E-03 | -2.78  | 3.01E-03 | M-6 |
| ENSMMUG00000018394  | SAXO1     | Stabilizer Of Axonemal Microtubules 1                              | 48.72  | 16.07  | 6.94  | 0.34 | -2.17 | 1.61E-02 | -3.12  | 3.33E-04 | -3.21  | 3.62E-03 | M-6 |
| ENSMMUG00000008520  | ATP8A2    | ATPase Phospholipid Transporting 8A2                               | 50.93  | 20.38  | 5.00  | 0.77 | -2.14 | 7.35E-03 | -2.76  | 3.47E-04 | -2.18  | 3.47E-02 | M-6 |
| ENSMMUG000000038849 | DEFB115   | Defensin Beta 115                                                  | 3.36   | 8.21   | 0.13  | 0.01 | -8.20 | 1.70E-02 | -7.77  | 2.96E-02 | -15.35 | 5.13E-05 | M-6 |
| ENSMMUG00000018090  | GLP2R     | Glucagon Like Peptide 2 Receptor                                   | 69.37  | 9.67   | 3.68  | 0.21 | -3.04 | 2.43E-04 | -3.40  | 4.23E-05 | -2.68  | 1.34E-02 | M-6 |
| ENSMMUG00000007988  | NLRP11    | NLR Family Pyrin Domain Containing 11                              | 130.61 | 38.67  | 3.32  | 0.75 | -2.37 | 1.29E-03 | -3.36  | 2.23E-06 | -2.05  | 3.61E-02 | M-6 |

- a) FPKM: Fragments Per Kilobase of transcript per Million mapped reads.  
b) L2FC: Log fold change of base 2.  
c) FDR: False discovery rate. Adjusted p-value using the Benjamin-Hochberg method.
