# Supplementary material
Source: PubMed Central journal article supplement (PMC6417155)
Supplement: gaz001_schall_et_al._table_s3.pdf [file gaz001_schall_et_al._table_s3.pdf]

Table S3 - EGA1 super-group DEGs

| Ensembl ID         | Symbol       | GeneName                                                   | FPKM <sup>a</sup> |        |        |            | MII:8-Cell        |                  | 8-Cell:Morula |          | Morula:Blast |          | Sub-Group |
|--------------------|--------------|------------------------------------------------------------|-------------------|--------|--------|------------|-------------------|------------------|---------------|----------|--------------|----------|-----------|
|                    |              |                                                            | MI                | 8Cell  | Morula | Exp. Blast | L2FC <sup>b</sup> | FDR <sup>c</sup> | L2FC          | FDR      | L2FC         | FDR      |           |
| ENSMMUG00000042049 |              |                                                            | 0.00              | 0.45   | 0.30   | 0.84       | 38.25             | 5.83E-10         | -25.14        | 9.21E-05 | 6.55         | 6.25E-01 | EGA-1     |
| ENSMMUG00000038367 | SOX11        | SRY-box 11                                                 | 0.00              | 6.71   | 1.00   | 0.03       | 31.98             | 3.53E-26         | -9.63         | 3.76E-03 | -0.51        | 9.68E-01 | EGA-1     |
| ENSMMUG00000045213 |              |                                                            | 0.00              | 2.64   | 1.23   | 0.89       | 31.25             | 6.41E-07         | -18.80        | 4.66E-03 | 9.28         | 4.20E-01 | EGA-1     |
| ENSMMUG00000048067 |              |                                                            | 0.07              | 0.61   | 0.56   | 0.56       | 30.80             | 1.02E-06         | -14.24        | 3.94E-02 | -0.93        | 9.69E-01 | EGA-1     |
| ENSMMUG00000008094 |              |                                                            | 0.00              | 0.83   | 0.61   | 2.33       | 28.09             | 7.27E-28         | -7.51         | 6.51E-03 | 11.93        | 1.57E-04 | EGA-2     |
| ENSMMUG00000019401 |              |                                                            | 0.01              | 8.27   | 0.00   | 2.07       | 23.45             | 5.89E-07         | -19.35        | 5.10E-05 | 22.01        | 5.90E-05 | EGA-2     |
| ENSMMUG00000035757 |              |                                                            | 0.03              | 4.21   | 0.41   | 2.04       | 23.05             | 8.57E-09         | -23.37        | 7.81E-09 | 18.75        | 7.84E-05 | EGA-2     |
| ENSMMUG00000045115 |              |                                                            | 0.34              | 12.37  | 0.00   | 0.63       | 16.27             | 2.36E-05         | -26.59        | 9.83E-13 | 25.88        | 3.33E-10 | EGA-2     |
| ENSMMUG00000048947 |              |                                                            | 0.05              | 11.59  | 0.64   | 2.99       | 13.02             | 4.31E-03         | -12.63        | 4.93E-03 | 5.19         | 5.36E-01 | EGA-1     |
| ENSMMUG00000044514 | PSORS1C2     | Psoriasis Susceptibility 1 Candidate 2                     | 0.01              | 4.34   | 0.90   | 1.12       | 12.88             | 8.95E-05         | -7.59         | 2.58E-02 | 8.54         | 5.15E-02 | EGA-1     |
| ENSMMUG00000046387 | LOC708657    | Putative Protein SSX6                                      | 0.01              | 19.25  | 3.34   | 0.08       | 11.23             | 2.97E-08         | -5.20         | 1.12E-02 | -4.10        | 2.07E-01 | EGA-1     |
| ENSMMUG00000014885 | LOC100424340 | Uncharacterized Protein CXorf49                            | 0.01              | 11.00  | 2.15   | 0.78       | 11.21             | 8.03E-12         | -6.04         | 5.67E-05 | 3.71         | 1.02E-01 | EGA-1     |
| ENSMMUG00000043314 | LOC709052    | Protein SSX8                                               | 0.02              | 30.68  | 3.00   | 0.11       | 11.12             | 5.54E-13         | -6.07         | 3.63E-05 | -2.71        | 2.89E-01 | EGA-1     |
| ENSMMUG00000018513 | IRF4         | Interferon Regulatory Factor 4                             | 0.00              | 4.72   | 0.27   | 0.02       | 10.94             | 8.84E-14         | -6.81         | 1.69E-06 | -2.92        | 2.00E-01 | EGA-1     |
| ENSMMUG00000002545 | LOC705514    | Putative Zinc Finger And SCAN Domain-containing Protein 5C | 0.01              | 16.22  | 0.39   | 0.70       | 10.86             | 2.27E-15         | -5.00         | 1.12E-04 | -0.24        | 9.64E-01 | EGA-1     |
| ENSMMUG00000046769 | LOC106996150 | Putative Protein SSX6                                      | 0.05              | 85.84  | 2.04   | 0.45       | 10.75             | 2.79E-16         | -8.35         | 5.83E-11 | 0.00         | 9.99E-01 | EGA-1     |
| ENSMMUG00000041263 | LOC106995205 | Putative Protein SSX6                                      | 0.12              | 179.90 | 7.49   | 0.86       | 10.47             | 1.82E-24         | -7.44         | 1.09E-12 | 0.07         | 9.86E-01 | EGA-1     |
| ENSMMUG00000038283 | LOC106995824 | Putative Protein SSX6                                      | 0.12              | 157.88 | 6.92   | 0.74       | 10.42             | 6.03E-24         | -7.32         | 3.94E-12 | -0.21        | 9.61E-01 | EGA-1     |
| ENSMMUG00000041925 | LOC106995770 | Putative Protein SSX6                                      | 0.12              | 157.17 | 6.91   | 0.72       | 10.42             | 6.52E-24         | -7.35         | 3.45E-12 | -0.27        | 9.47E-01 | EGA-1     |
| ENSMMUG00000039486 |              |                                                            | 0.04              | 2.28   | 1.91   | 0.02       | 10.37             | 2.08E-03         | -8.28         | 1.42E-02 | 2.05         | 8.00E-01 | EGA-1     |
| ENSMMUG00000046900 | LOC100430341 | Putative Protein SSX6                                      | 0.05              | 69.70  | 2.00   | 0.34       | 10.35             | 6.80E-18         | -7.99         | 2.46E-11 | -0.16        | 9.74E-01 | EGA-1     |
| ENSMMUG00000012619 | LOC697148    | Cancer/testis Antigen 47B-like                             | 0.02              | 12.11  | 4.31   | 0.23       | 10.20             | 3.60E-09         | -3.76         | 2.94E-02 | -2.47        | 4.10E-01 | EGA-1     |
| ENSMMUG00000010112 | LOC709149    | Protein SSX2-like                                          | 0.00              | 5.39   | 0.64   | 0.02       | 10.19             | 4.80E-07         | -6.07         | 2.04E-03 | -0.73        | 9.04E-01 | EGA-1     |
| ENSMMUG00000013667 | TKTL1        | Transketolase Like 1                                       | 0.04              | 26.65  | 3.08   | 0.57       | 10.15             | 9.35E-10         | -8.09         | 1.30E-06 | 2.04         | 5.37E-01 | EGA-1     |
| ENSMMUG00000017405 | LOC701497    | Cancer/testis Antigen 1                                    | 0.02              | 13.54  | 1.45   | 0.22       | 10.09             | 2.71E-11         | -3.55         | 1.39E-02 | -3.04        | 1.94E-01 | EGA-1     |
| ENSMMUG00000021135 | SLC34A2      | Solute Carrier Family 34 Member 2                          | 0.05              | 42.63  | 3.47   | 8.15       | 10.00             | 3.28E-42         | -4.34         | 1.10E-08 | 1.14         | 4.10E-01 | EGA-1     |
| ENSMMUG00000003068 |              |                                                            | 0.10              | 9.47   | 2.39   | 0.06       | 9.94              | 1.20E-03         | -9.29         | 2.07E-03 | -2.17        | 7.60E-01 | EGA-1     |
| ENSMMUG00000048019 |              |                                                            | 0.05              | 69.35  | 7.77   | 0.46       | 9.91              | 8.54E-15         | -5.57         | 1.50E-05 | -1.24        | 6.66E-01 | EGA-1     |
| ENSMMUG00000007788 | DUXA         | Double Homeobox A                                          | 0.10              | 130.85 | 32.81  | 1.48       | 9.84              | 2.62E-17         | -2.65         | 3.62E-02 | -3.41        | 3.42E-02 | EGA-3     |
| ENSMMUG00000040722 | LOC722781    | PRAME Family Member 5                                      | 0.06              | 63.85  | 9.02   | 1.74       | 9.80              | 1.90E-21         | -3.04         | 5.14E-03 | -1.88        | 2.78E-01 | EGA-1     |
| ENSMMUG00000005986 | KLF17        | Kruppel Like Factor 17                                     | 0.06              | 83.48  | 14.22  | 1.86       | 9.80              | 4.68E-19         | -4.28         | 1.64E-04 | -1.99        | 2.88E-01 | EGA-1     |
| ENSMMUG00000043184 | LOC706956    | Nuclear Nucleic Acid-binding Protein C1D Pseudogene        | 0.07              | 55.56  | 5.60   | 3.41       | 9.77              | 1.15E-16         | -2.94         | 9.71E-03 | -1.38        | 5.21E-01 | EGA-1     |
| ENSMMUG00000042623 |              |                                                            | 0.04              | 63.57  | 2.64   | 1.33       | 9.76              | 1.57E-10         | -7.16         | 2.09E-06 | 1.35         | 6.87E-01 | EGA-1     |
| ENSMMUG00000000414 |              |                                                            | 0.02              | 30.09  | 0.61   | 0.24       | 9.74              | 5.12E-05         | -9.60         | 5.88E-05 | 3.71         | 3.49E-01 | EGA-1     |
| ENSMMUG00000012549 | TBX20        | T-box 20                                                   | 0.01              | 3.51   | 1.57   | 0.46       | 9.72              | 1.03E-09         | -3.04         | 4.80E-02 | -0.43        | 9.29E-01 | EGA-1     |
| ENSMMUG00000019164 | LOC100424446 | Protein SSX3-like                                          | 0.02              | 12.56  | 3.45   | 0.08       | 9.70              | 3.10E-08         | -4.90         | 3.15E-03 | -3.40        | 2.16E-01 | EGA-1     |

|                    |              |                                                      |      |        |       |      |      |          |        |          |       |          |       |
|--------------------|--------------|------------------------------------------------------|------|--------|-------|------|------|----------|--------|----------|-------|----------|-------|
| ENSMMUG0000004301  | LOC106997598 | EF-hand Calcium-binding Domain-containing Protein 10 | 0.22 | 7.73   | 0.71  | 0.40 | 9.67 | 2.88E-04 | -7.04  | 9.68E-03 | 0.19  | 9.86E-01 | EGA-1 |
| ENSMMUG00000041248 |              |                                                      | 0.01 | 4.40   | 1.10  | 0.03 | 9.56 | 6.06E-08 | -5.01  | 5.03E-03 | -1.72 | 6.77E-01 | EGA-1 |
| ENSMMUG0000000710  | LOC698764    | Inosine-5'-monophosphate Dehydrogenase 1             | 0.01 | 2.62   | 0.37  | 0.28 | 9.52 | 4.76E-09 | -3.52  | 3.34E-02 | -1.07 | 7.85E-01 | EGA-1 |
| ENSMMUG00000014906 | RAB39A       | RAB39A, Member RAS Oncogene Family                   | 0.01 | 6.10   | 0.74  | 3.82 | 9.46 | 7.17E-08 | -3.88  | 1.90E-02 | 2.72  | 2.96E-01 | EGA-1 |
| ENSMMUG00000012585 | OVOL1        | Ovo Like Transcriptional Repressor 1                 | 0.00 | 1.99   | 1.95  | 0.99 | 9.45 | 4.57E-08 | -5.56  | 9.77E-04 | 2.65  | 3.34E-01 | EGA-1 |
| ENSMMUG00000030814 |              |                                                      | 0.00 | 1.00   | 0.29  | 0.22 | 9.44 | 6.11E-08 | -3.48  | 3.85E-02 | -0.52 | 9.16E-01 | EGA-1 |
| ENSMMUG00000015532 | LOC705401    | Zinc Finger And SCAN Domain-containing Protein 5B    | 0.12 | 103.43 | 9.04  | 1.05 | 9.36 | 6.01E-26 | -4.09  | 9.19E-06 | -2.31 | 8.67E-02 | EGA-1 |
| ENSMMUG00000017058 | UNCX         | UNC Homeobox                                         | 0.00 | 3.71   | 0.57  | 0.02 | 9.33 | 2.99E-06 | -6.34  | 1.37E-03 | -0.19 | 9.82E-01 | EGA-1 |
| ENSMMUG00000016732 | ANKRD35      | Ankyrin Repeat Domain 35                             | 0.00 | 4.68   | 0.36  | 0.06 | 9.30 | 3.96E-10 | -4.86  | 6.24E-04 | -0.98 | 7.85E-01 | EGA-1 |
| ENSMMUG00000023372 | RCSD1        | RCSD Domain Containing 1                             | 0.01 | 2.19   | 0.54  | 0.50 | 9.18 | 8.72E-07 | -5.80  | 1.30E-03 | 3.40  | 2.29E-01 | EGA-1 |
| ENSMMUG00000028908 | LOC705273    | Putative Methyl-CpG-binding Domain Protein 3-like 5  | 0.03 | 42.23  | 7.50  | 3.21 | 9.14 | 1.86E-09 | -6.71  | 5.37E-06 | 1.17  | 7.35E-01 | EGA-1 |
| ENSMMUG00000020044 |              |                                                      | 0.01 | 4.10   | 0.89  | 0.09 | 9.14 | 3.56E-06 | -6.54  | 7.01E-04 | -0.34 | 9.64E-01 | EGA-1 |
| ENSMMUG00000035585 |              |                                                      | 0.38 | 7.93   | 3.16  | 4.47 | 9.14 | 5.19E-03 | -11.61 | 2.04E-04 | 7.48  | 8.63E-02 | EGA-1 |
| ENSMMUG00000044300 | LOC695155    | Melanoma-associated Antigen 1                        | 0.01 | 3.85   | 0.21  | 0.18 | 9.12 | 3.88E-05 | -5.28  | 1.51E-02 | 0.98  | 8.67E-01 | EGA-1 |
| ENSMMUG00000041090 | LOC718749    | Tripartite Motif-containing Protein 43               | 0.11 | 118.10 | 6.27  | 1.67 | 9.11 | 6.17E-13 | -5.46  | 2.81E-05 | -0.88 | 7.89E-01 | EGA-1 |
| ENSMMUG00000043608 | LOC718749    | Tripartite Motif-containing Protein 43               | 0.14 | 129.20 | 6.26  | 1.87 | 9.05 | 2.09E-13 | -5.40  | 2.25E-05 | -0.77 | 8.13E-01 | EGA-1 |
| ENSMMUG00000039775 |              |                                                      | 0.07 | 62.01  | 2.79  | 0.82 | 8.90 | 1.78E-06 | -7.13  | 1.97E-04 | 1.45  | 7.44E-01 | EGA-1 |
| ENSMMUG00000016054 | HFE2         | Hemochromatosis Type 2 (juvenile)                    | 0.00 | 3.50   | 0.29  | 0.08 | 8.82 | 1.27E-05 | -5.90  | 2.32E-03 | 3.87  | 1.92E-01 | EGA-1 |
| ENSMMUG00000045019 | LOC700765    | Lysine-specific Demethylase 4E-like                  | 0.04 | 24.68  | 0.35  | 0.48 | 8.76 | 9.93E-06 | -6.50  | 1.47E-03 | 1.77  | 6.85E-01 | EGA-1 |
| ENSMMUG00000042532 | LEUTX        | Leucine Twenty Homeobox                              | 0.15 | 160.56 | 18.71 | 1.58 | 8.72 | 4.46E-14 | -6.50  | 3.99E-08 | -0.41 | 9.12E-01 | EGA-1 |
| ENSMMUG00000008686 | S1PR5        | Sphingosine-1-phosphate Receptor 5                   | 0.02 | 12.06  | 4.96  | 1.73 | 8.72 | 7.68E-16 | -2.50  | 3.12E-02 | 0.15  | 9.71E-01 | EGA-1 |
| ENSMMUG00000014800 | SLC17A7      | Solute Carrier Family 17 Member 7                    | 0.03 | 20.81  | 3.06  | 0.42 | 8.72 | 1.56E-14 | -3.21  | 8.42E-03 | -2.51 | 1.64E-01 | EGA-1 |
| ENSMMUG00000017200 | SALL1        | Spalt Like Transcription Factor 1                    | 0.01 | 3.49   | 0.14  | 0.80 | 8.70 | 4.91E-10 | -6.65  | 2.57E-06 | 3.18  | 1.27E-01 | EGA-1 |
| ENSMMUG00000018573 |              |                                                      | 0.09 | 35.28  | 4.35  | 1.65 | 8.64 | 5.54E-13 | -4.04  | 8.05E-04 | -0.23 | 9.61E-01 | EGA-1 |
| ENSMMUG00000001178 | CCNA1        | Cyclin A1                                            | 0.04 | 25.56  | 2.71  | 0.28 | 8.63 | 4.08E-16 | -4.29  | 1.08E-04 | -2.06 | 2.47E-01 | EGA-1 |
| ENSMMUG00000045561 |              |                                                      | 0.13 | 4.75   | 0.31  | 0.34 | 8.59 | 2.54E-07 | -6.88  | 3.41E-05 | 0.94  | 8.29E-01 | EGA-1 |
| ENSMMUG00000002613 | IRX1         | Iroquois Homeobox 1                                  | 0.01 | 3.14   | 6.30  | 0.17 | 8.43 | 2.09E-06 | -4.27  | 1.55E-02 | 0.27  | 9.67E-01 | EGA-1 |
| ENSMMUG00000002219 |              |                                                      | 0.04 | 11.30  | 0.91  | 0.12 | 8.41 | 2.63E-05 | -6.77  | 6.10E-04 | -1.94 | 6.47E-01 | EGA-1 |
| ENSMMUG00000005550 | SLFN12L      | Schlafen Family Member 12 Like                       | 0.00 | 1.50   | 0.85  | 0.05 | 8.37 | 5.98E-06 | -4.67  | 1.01E-02 | -0.59 | 9.13E-01 | EGA-1 |
| ENSMMUG00000028958 |              |                                                      | 0.15 | 199.42 | 26.99 | 5.33 | 8.33 | 3.65E-07 | -6.21  | 2.18E-04 | 1.40  | 7.13E-01 | EGA-1 |
| ENSMMUG00000028727 |              |                                                      | 0.00 | 2.98   | 0.12  | 0.07 | 8.26 | 8.19E-03 | -6.92  | 2.76E-02 | 0.59  | 9.59E-01 | EGA-1 |
| ENSMMUG00000019257 | TNP1         | Transition Protein 1                                 | 0.01 | 4.30   | 0.25  | 0.07 | 8.23 | 2.23E-02 | -20.47 | 4.42E-10 | 13.94 | 5.81E-04 | EGA-2 |

|                    |              |                                                             |      |        |       |       |      |          |       |          |       |          |       |
|--------------------|--------------|-------------------------------------------------------------|------|--------|-------|-------|------|----------|-------|----------|-------|----------|-------|
| ENSMMUG00000045175 | LOC715953    | PRAME Family Member 17                                      | 0.05 | 44.16  | 2.51  | 0.36  | 8.20 | 1.64E-15 | -3.76 | 4.06E-04 | -3.60 | 8.43E-03 | EGA-3 |
| ENSMMUG00000005591 | LOC705142    | Putative Methyl-CpG-binding Domain Protein 3-like 5         | 0.02 | 25.15  | 9.37  | 1.83  | 8.16 | 2.31E-08 | -4.48 | 2.21E-03 | -0.36 | 9.46E-01 | EGA-1 |
| ENSMMUG00000045332 |              |                                                             | 0.05 | 41.81  | 2.97  | 1.02  | 8.12 | 4.39E-07 | -6.28 | 1.42E-04 | 1.42  | 6.95E-01 | EGA-1 |
| ENSMMUG00000015212 |              |                                                             | 0.03 | 16.42  | 1.50  | 0.01  | 8.07 | 5.38E-05 | -6.77 | 1.13E-03 | -3.17 | 3.65E-01 | EGA-1 |
| ENSMMUG00000037555 | LOC715706    | Schlafen Family Member 13                                   | 0.03 | 14.60  | 2.22  | 0.18  | 8.05 | 1.31E-09 | -3.83 | 6.44E-03 | -3.51 | 6.87E-02 | EGA-1 |
| ENSMMUG00000047834 |              |                                                             | 1.24 | 113.34 | 8.83  | 1.26  | 8.03 | 2.99E-06 | -4.65 | 1.10E-02 | -2.52 | 4.33E-01 | EGA-1 |
| ENSMMUG00000039594 |              |                                                             | 0.03 | 2.28   | 0.01  | 0.18  | 8.00 | 9.75E-04 | -6.57 | 8.04E-03 | 2.23  | 6.73E-01 | EGA-1 |
| ENSMMUG00000048723 |              |                                                             | 0.28 | 72.15  | 7.43  | 19.06 | 7.88 | 3.41E-07 | -3.61 | 2.09E-02 | 1.17  | 7.51E-01 | EGA-1 |
| ENSMMUG00000002413 | PLVAP        | Plasmalemma Vesicle Associated Protein                      | 0.16 | 33.20  | 3.58  | 0.22  | 7.88 | 1.39E-15 | -5.66 | 3.32E-08 | -2.03 | 2.25E-01 | EGA-1 |
| ENSMMUG00000043376 |              |                                                             | 1.27 | 125.02 | 10.50 | 1.27  | 7.87 | 2.44E-06 | -4.20 | 1.95E-02 | -2.98 | 2.99E-01 | EGA-1 |
| ENSMMUG00000039934 |              |                                                             | 1.27 | 125.00 | 10.54 | 1.27  | 7.87 | 2.44E-06 | -4.20 | 1.95E-02 | -2.98 | 2.99E-01 | EGA-1 |
| ENSMMUG00000015273 | NMRK2        | Nicotinamide Riboside Kinase 2                              | 0.04 | 2.59   | 0.19  | 1.09  | 7.84 | 2.06E-04 | -8.62 | 5.29E-05 | 6.75  | 1.45E-02 | EGA-2 |
| ENSMMUG00000047420 | KLF18        | Kruppel Like Factor 18                                      | 1.28 | 208.01 | 6.35  | 0.40  | 7.84 | 1.57E-08 | -6.26 | 1.08E-05 | -2.80 | 2.12E-01 | EGA-1 |
| ENSMMUG00000044603 | ZFP36L1      | ZFP36 Ring Finger Protein Like 1                            | 0.09 | 5.69   | 2.27  | 4.97  | 7.80 | 8.92E-23 | -3.77 | 3.98E-06 | 3.98  | 2.93E-05 | EGA-2 |
| ENSMMUG00000013598 | LOC693602    | Putative Tripartite Motif-containing Protein 64B            | 0.04 | 46.42  | 2.55  | 0.64  | 7.78 | 1.56E-04 | -8.29 | 7.64E-05 | 3.43  | 3.19E-01 | EGA-1 |
| ENSMMUG00000003927 | PAQR9        | Progesterone And AdipoQ Receptor Family Member 9            | 0.01 | 2.13   | 0.33  | 0.21  | 7.77 | 6.27E-07 | -4.68 | 2.88E-03 | 1.16  | 7.52E-01 | EGA-1 |
| ENSMMUG00000045637 | ZSCAN5A      | Zinc Finger And SCAN Domain Containing 5A                   | 0.07 | 11.17  | 0.78  | 0.45  | 7.76 | 5.87E-23 | -4.18 | 2.87E-07 | -0.28 | 9.13E-01 | EGA-1 |
| ENSMMUG00000004055 | CD300LF      | CD300 Molecule Like Family Member F                         | 0.03 | 6.74   | 1.41  | 0.11  | 7.74 | 2.96E-07 | -3.41 | 2.64E-02 | -1.45 | 6.51E-01 | EGA-1 |
| ENSMMUG00000001923 | LMOD1        | Leiomodin 1                                                 | 0.07 | 2.08   | 0.21  | 0.38  | 7.61 | 2.30E-05 | -5.66 | 2.02E-03 | 4.47  | 8.99E-02 | EGA-1 |
| ENSMMUG00000002159 | RFPL4B       | Ret Finger Protein Like 4B                                  | 0.05 | 40.78  | 12.20 | 1.55  | 7.60 | 7.26E-11 | -2.59 | 4.33E-02 | -2.89 | 9.32E-02 | EGA-1 |
| ENSMMUG00000043227 | S100A14      | S100 Calcium Binding Protein A14                            | 0.00 | 0.84   | 0.32  | 16.11 | 7.56 | 2.81E-07 | -4.04 | 2.22E-03 | 7.59  | 4.07E-08 | EGA-2 |
| ENSMMUG00000046249 |              |                                                             | 0.23 | 67.33  | 5.33  | 0.81  | 7.31 | 3.89E-10 | -7.65 | 3.29E-10 | 0.50  | 8.88E-01 | EGA-1 |
| ENSMMUG00000022316 |              |                                                             | 0.03 | 3.29   | 0.47  | 0.30  | 7.30 | 1.29E-10 | -2.62 | 2.15E-02 | 3.48  | 2.25E-02 | EGA-2 |
| ENSMMUG00000011469 | GCNA         | Germ Cell Nuclear Acidic Peptidase                          | 0.08 | 7.14   | 0.56  | 0.30  | 7.23 | 3.61E-07 | -4.17 | 5.56E-03 | -0.18 | 9.74E-01 | EGA-1 |
| ENSMMUG00000020616 | ELAVL3       | ELAV Like RNA Binding Protein 3                             | 0.03 | 9.53   | 1.34  | 0.07  | 7.00 | 1.35E-06 | -5.20 | 4.62E-04 | -2.20 | 4.00E-01 | EGA-1 |
| ENSMMUG00000005335 | ZSCAN4       | Zinc Finger And SCAN Domain Containing 4                    | 0.77 | 57.89  | 11.05 | 2.09  | 6.97 | 1.66E-10 | -4.30 | 1.67E-04 | -0.58 | 8.52E-01 | EGA-1 |
| ENSMMUG00000009612 | FAM71F1      | Family With Sequence Similarity 71 Member F1                | 0.07 | 7.32   | 0.66  | 0.34  | 6.96 | 4.39E-06 | -5.14 | 7.84E-04 | 0.57  | 9.02E-01 | EGA-1 |
| ENSMMUG00000044172 | LOC106995837 | RNA Polymerase II Transcription Factor SIII Subunit A3-like | 0.03 | 7.55   | 2.45  | 0.28  | 6.93 | 9.12E-03 | -7.36 | 5.08E-03 | 4.08  | 3.36E-01 | EGA-1 |
| ENSMMUG00000043738 |              |                                                             | 0.03 | 7.31   | 2.35  | 0.28  | 6.91 | 8.91E-03 | -7.01 | 7.35E-03 | 3.97  | 3.51E-01 | EGA-1 |
| ENSMMUG00000008430 | CACNB3       | Calcium Voltage-gated Channel Auxiliary Subunit Beta 3      | 0.35 | 27.79  | 3.46  | 0.67  | 6.83 | 3.75E-09 | -3.98 | 1.10E-03 | -0.37 | 9.22E-01 | EGA-1 |
| ENSMMUG00000039325 |              |                                                             | 0.07 | 8.89   | 1.57  | 0.54  | 6.77 | 3.61E-05 | -3.93 | 2.17E-02 | -0.28 | 9.65E-01 | EGA-1 |
| ENSMMUG00000020697 | LTB4R        | Leukotriene B4 Receptor                                     | 0.03 | 3.40   | 0.48  | 0.12  | 6.74 | 1.95E-04 | -3.69 | 4.59E-02 | 2.23  | 5.07E-01 | EGA-1 |
| ENSMMUG00000038544 |              |                                                             | 0.05 | 10.52  | 0.39  | 0.28  | 6.68 | 6.48E-03 | -6.83 | 4.91E-03 | -0.06 | 9.95E-01 | EGA-1 |

|                     |              |                                                     |      |       |       |      |      |          |        |          |       |          |       |
|---------------------|--------------|-----------------------------------------------------|------|-------|-------|------|------|----------|--------|----------|-------|----------|-------|
| ENSMMUG0000000500   | FNDC1        | Fibronectin Type III Domain Containing 1            | 0.27 | 2.57  | 0.14  | 0.06 | 6.53 | 2.21E-05 | -6.64  | 2.73E-05 | -0.36 | 9.50E-01 | EGA-1 |
| ENSMMUG00000046109  | HNRNPCL1     | Heterogeneous Nuclear Ribonucleoprotein C-like 1    | 0.30 | 43.10 | 1.68  | 0.97 | 6.44 | 1.85E-15 | -3.91  | 4.31E-06 | -1.75 | 2.03E-01 | EGA-1 |
| ENSMMUG00000018924  | RPRD1B       | Regulation Of Nuclear Pre-mRNA Domain Containing 1B | 0.33 | 9.75  | 3.19  | 6.19 | 6.32 | 3.04E-12 | -2.30  | 1.61E-02 | 1.34  | 4.13E-01 | EGA-1 |
| ENSMMUG00000047988  |              |                                                     | 0.25 | 7.15  | 0.30  | 0.57 | 6.31 | 7.44E-05 | -5.86  | 2.35E-04 | 3.19  | 2.09E-01 | EGA-1 |
| ENSMMUG00000009443  | ENO2         | Enolase 2                                           | 0.25 | 10.06 | 1.10  | 0.25 | 6.30 | 1.03E-03 | -5.28  | 7.02E-03 | -3.57 | 2.36E-01 | EGA-1 |
| ENSMMUG00000008822  | KTI12        | KTI12 Chromatin Associated Homolog                  | 0.32 | 5.19  | 2.03  | 2.25 | 6.28 | 3.02E-06 | -3.08  | 2.48E-02 | 2.73  | 1.89E-01 | EGA-1 |
| ENSMMUG00000022205  | PCBP4        | Poly(rC) Binding Protein 4                          | 0.05 | 1.06  | 0.19  | 0.09 | 6.08 | 3.86E-06 | -4.83  | 3.59E-04 | 0.36  | 9.36E-01 | EGA-1 |
| ENSMMUG00000014601  | MYC          | MYC Proto-oncogene, BHLH Transcription Factor       | 0.44 | 17.79 | 10.79 | 7.34 | 6.05 | 6.22E-12 | -2.18  | 2.58E-02 | 1.45  | 3.59E-01 | EGA-1 |
| ENSMMUG00000009648  | PAX9         | Paired Box 9                                        | 0.79 | 2.30  | 0.08  | 0.29 | 5.85 | 7.55E-03 | -6.54  | 1.80E-03 | 2.72  | 4.81E-01 | EGA-1 |
| ENSMMUG00000000925  | HOXC10       | Homeobox C10                                        | 0.03 | 15.13 | 0.97  | 2.25 | 5.78 | 2.60E-02 | -10.62 | 2.14E-05 | 9.76  | 7.63E-04 | EGA-2 |
| ENSMMUG00000012586  | ZNF878       | Zinc Finger Protein 878                             | 0.40 | 23.18 | 9.45  | 5.91 | 5.70 | 1.70E-13 | -1.77  | 4.31E-02 | -0.78 | 6.56E-01 | EGA-1 |
| ENSMMUG00000019949  | PRNP         | Prion Protein                                       | 0.41 | 15.88 | 3.84  | 0.22 | 5.69 | 1.25E-07 | -3.00  | 9.85E-03 | -3.64 | 1.28E-02 | EGA-3 |
| ENSMMUG00000011863  | RFPL1        | Ret Finger Protein Like 1                           | 0.72 | 67.17 | 7.27  | 1.62 | 5.67 | 1.31E-05 | -7.19  | 3.37E-08 | 1.43  | 5.94E-01 | EGA-1 |
| ENSMMUG00000008364  | ZNF771       | Zinc Finger Protein 771                             | 0.11 | 4.90  | 0.42  | 0.15 | 5.64 | 1.23E-02 | -7.92  | 3.20E-04 | 3.09  | 4.23E-01 | EGA-1 |
| ENSMMUG00000042907  | PMVK         | Phosphomevalonate Kinase                            | 0.10 | 1.17  | 0.19  | 1.63 | 5.64 | 5.73E-04 | -4.45  | 7.74E-03 | 2.73  | 2.93E-01 | EGA-1 |
| ENSMMUG00000007653  | SYT5         | Synaptotagmin 5                                     | 0.25 | 9.02  | 0.44  | 0.40 | 5.53 | 3.02E-03 | -6.21  | 4.48E-04 | 2.72  | 3.92E-01 | EGA-1 |
| ENSMMUG00000019993  | SESN2        | Sestrin 2                                           | 0.49 | 21.53 | 6.11  | 4.83 | 5.52 | 1.07E-10 | -1.92  | 4.66E-02 | -0.70 | 7.39E-01 | EGA-1 |
| ENSMMUG000000039682 |              |                                                     | 0.11 | 7.91  | 0.93  | 0.27 | 5.47 | 4.95E-03 | -4.08  | 4.28E-02 | 0.66  | 9.15E-01 | EGA-1 |
| ENSMMUG00000040877  |              |                                                     | 0.08 | 7.99  | 2.45  | 0.76 | 5.34 | 3.62E-03 | -4.72  | 1.29E-02 | 0.88  | 8.54E-01 | EGA-1 |
| ENSMMUG00000007826  | LOC106997200 | Hypothetical Protein                                | 0.27 | 3.93  | 2.27  | 1.12 | 5.28 | 1.31E-03 | -3.37  | 4.42E-02 | -0.53 | 9.11E-01 | EGA-1 |
| ENSMMUG00000022709  | SLC2A4       | Solute Carrier Family 2 Member 4                    | 0.25 | 11.07 | 0.24  | 0.08 | 5.25 | 4.39E-05 | -6.50  | 8.89E-07 | -1.27 | 6.58E-01 | EGA-1 |
| ENSMMUG00000005620  | PCDH9        | Protocadherin 9                                     | 0.06 | 13.01 | 2.59  | 0.05 | 5.21 | 2.04E-03 | -5.66  | 7.72E-04 | -1.87 | 5.65E-01 | EGA-1 |
| ENSMMUG00000005751  | ADAT1        | Adenosine Deaminase, TRNA Specific 1                | 0.22 | 16.94 | 1.17  | 4.42 | 5.19 | 1.79E-04 | -3.38  | 1.95E-02 | 2.29  | 3.19E-01 | EGA-1 |
| ENSMMUG00000002268  | AFMID        | Arylformamidase                                     | 0.07 | 2.83  | 0.56  | 0.21 | 5.06 | 3.08E-06 | -3.00  | 8.52E-03 | 0.41  | 9.02E-01 | EGA-1 |
| ENSMMUG00000018597  | NUBP2        | Nucleotide Binding Protein 2                        | 0.50 | 4.91  | 1.48  | 0.90 | 5.05 | 2.28E-04 | -2.99  | 4.02E-02 | -0.03 | 9.97E-01 | EGA-1 |
| ENSMMUG00000009222  | PLEKHA4      | Pleckstrin Homology Domain Containing A4            | 0.19 | 1.70  | 0.15  | 0.27 | 5.04 | 4.72E-03 | -5.47  | 1.95E-03 | 1.98  | 5.59E-01 | EGA-1 |
| ENSMMUG00000018814  | DGKA         | Diacylglycerol Kinase Alpha                         | 0.26 | 12.81 | 0.73  | 0.67 | 5.03 | 5.32E-06 | -4.00  | 4.34E-04 | 0.00  | 1.00E+00 | EGA-1 |
| ENSMMUG000000031516 |              |                                                     | 0.15 | 5.72  | 5.77  | 2.83 | 5.00 | 2.00E-03 | -3.53  | 3.41E-02 | 1.90  | 5.03E-01 | EGA-1 |
| ENSMMUG00000017392  |              |                                                     | 0.85 | 12.43 | 3.33  | 2.95 | 4.93 | 3.56E-07 | -2.88  | 4.99E-03 | 0.11  | 9.76E-01 | EGA-1 |
| ENSMMUG00000018301  | ZNF707       | Zinc Finger Protein 707                             | 0.07 | 3.37  | 0.80  | 0.43 | 4.90 | 7.06E-05 | -2.65  | 4.61E-02 | -1.81 | 4.13E-01 | EGA-1 |
| ENSMMUG00000010948  | PLEKHO2      | Pleckstrin Homology Domain Containing O2            | 0.12 | 2.47  | 1.12  | 0.56 | 4.85 | 1.26E-03 | -5.59  | 1.63E-04 | 2.83  | 2.20E-01 | EGA-1 |
| ENSMMUG00000004533  | PC           | Pyruvate Carboxylase                                | 0.13 | 0.85  | 0.37  | 0.56 | 4.85 | 6.17E-04 | -3.08  | 3.69E-02 | 2.27  | 3.23E-01 | EGA-1 |
| ENSMMUG00000004409  | ZNF608       | Zinc Finger Protein 608                             | 0.49 | 12.91 | 1.72  | 2.26 | 4.79 | 9.22E-09 | -3.14  | 3.17E-04 | 1.15  | 4.70E-01 | EGA-1 |
| ENSMMUG00000016753  | DNAH3        | Dynein Axonemal Heavy Chain 3                       | 0.08 | 1.38  | 0.56  | 1.53 | 4.79 | 2.44E-06 | -3.49  | 9.46E-04 | 2.41  | 1.06E-01 | EGA-1 |

|                    |              |                                                       |       |        |        |        |      |          |       |          |       |          |       |
|--------------------|--------------|-------------------------------------------------------|-------|--------|--------|--------|------|----------|-------|----------|-------|----------|-------|
| ENSMMUG00000030339 |              |                                                       | 1.42  | 22.34  | 9.86   | 11.01  | 4.78 | 1.71E-07 | -2.43 | 1.33E-02 | 0.27  | 9.30E-01 | EGA-1 |
| ENSMMUG00000046456 |              |                                                       | 0.09  | 2.55   | 0.09   | 0.12   | 4.75 | 2.87E-03 | -5.71 | 4.48E-04 | 1.37  | 7.23E-01 | EGA-1 |
| ENSMMUG00000000751 | NLE1         | Notchless Homolog 1                                   | 0.11  | 2.31   | 0.65   | 0.88   | 4.71 | 1.07E-04 | -2.71 | 3.62E-02 | 0.73  | 8.13E-01 | EGA-1 |
| ENSMMUG00000006296 | FLNC         | Filamin C                                             | 0.02  | 1.47   | 0.38   | 4.20   | 4.66 | 2.49E-03 | -4.44 | 3.45E-03 | 8.39  | 1.63E-07 | EGA-2 |
| ENSMMUG00000047155 | LOC711606    | Putative Zinc Finger Protein 735                      | 2.90  | 95.70  | 13.41  | 2.65   | 4.63 | 3.33E-10 | -2.89 | 1.82E-04 | -1.92 | 8.10E-02 | EGA-1 |
| ENSMMUG00000043719 | C1H1orf216   | Chromosome 1 Open Reading Frame, Human C1orf216       | 0.03  | 1.09   | 0.08   | 0.16   | 4.55 | 1.20E-02 | -3.71 | 4.55E-02 | 2.46  | 4.43E-01 | EGA-1 |
| ENSMMUG00000041575 | LOC106993437 | Serine/arginine-rich Splicing Factor 8-like           | 0.25  | 8.75   | 0.53   | 1.07   | 4.53 | 2.94E-04 | -4.64 | 2.20E-04 | 1.07  | 7.01E-01 | EGA-1 |
| ENSMMUG00000015971 | SORD         | Sorbitol Dehydrogenase                                | 0.13  | 6.43   | 0.53   | 0.85   | 4.53 | 1.97E-05 | -2.62 | 2.05E-02 | 0.63  | 8.19E-01 | EGA-1 |
| ENSMMUG00000043930 |              |                                                       | 0.18  | 2.97   | 0.07   | 0.19   | 4.48 | 1.52E-02 | -6.15 | 5.87E-04 | 3.28  | 2.41E-01 | EGA-1 |
| ENSMMUG00000017690 | CHRNB1       | Cholinergic Receptor Nicotinic Beta 1 Subunit         | 0.67  | 8.10   | 0.37   | 0.44   | 4.45 | 3.66E-04 | -6.18 | 1.98E-06 | 0.44  | 9.15E-01 | EGA-1 |
| ENSMMUG00000008059 | ZNF625       | Zinc Finger Protein 625                               | 0.11  | 2.17   | 0.29   | 1.49   | 4.41 | 1.64E-03 | -3.46 | 1.64E-02 | 2.73  | 2.00E-01 | EGA-1 |
| ENSMMUG00000048103 |              |                                                       | 2.03  | 70.61  | 1.49   | 2.28   | 4.39 | 1.48E-02 | -3.93 | 3.51E-02 | -0.64 | 9.05E-01 | EGA-1 |
| ENSMMUG00000008466 | LOC719477    | Ankyrin Repeat Domain-containing Protein 18A-like     | 0.22  | 2.84   | 0.76   | 0.87   | 4.36 | 6.11E-08 | -2.17 | 1.23E-02 | 0.06  | 9.86E-01 | EGA-1 |
| ENSMMUG00000049028 |              |                                                       | 57.23 | 112.85 | 207.50 | 283.94 | 4.36 | 4.20E-03 | -3.07 | 4.02E-02 | 1.94  | 4.99E-01 | EGA-1 |
| ENSMMUG00000047978 | LOC710293    | Ral-GDS-related Protein-like                          | 0.05  | 0.57   | 0.08   | 0.74   | 4.36 | 1.54E-04 | -3.41 | 4.31E-03 | 2.31  | 1.89E-01 | EGA-1 |
| ENSMMUG00000014940 | PNRC1        | Proline Rich Nuclear Receptor Coactivator 1           | 2.60  | 26.74  | 19.63  | 13.93  | 4.34 | 5.34E-11 | -1.78 | 1.40E-02 | 0.12  | 9.65E-01 | EGA-1 |
| ENSMMUG00000018778 | MRPL49       | Mitochondrial Ribosomal Protein L49                   | 1.32  | 30.13  | 7.66   | 14.28  | 4.31 | 1.95E-10 | -2.06 | 4.80E-03 | 0.92  | 4.89E-01 | EGA-1 |
| ENSMMUG00000013376 | POU2F2       | POU Class 2 Homeobox 2                                | 0.36  | 10.81  | 0.66   | 0.24   | 4.22 | 6.96E-05 | -5.47 | 3.08E-07 | 0.30  | 9.36E-01 | EGA-1 |
| ENSMMUG00000046400 |              |                                                       | 0.35  | 5.89   | 1.57   | 0.28   | 4.15 | 3.47E-02 | -5.06 | 1.00E-02 | 0.92  | 8.54E-01 | EGA-1 |
| ENSMMUG00000009041 | NSD1         | Nuclear Receptor Binding SET Domain Protein 1         | 1.76  | 28.71  | 13.07  | 19.51  | 4.12 | 4.46E-21 | -1.17 | 1.82E-02 | 0.92  | 2.06E-01 | EGA-1 |
| ENSMMUG00000017440 | IRX5         | Iroquois Homeobox 5                                   | 0.71  | 10.31  | 1.52   | 0.01   | 4.08 | 6.36E-03 | -7.09 | 2.88E-06 | -3.32 | 1.72E-01 | EGA-1 |
| ENSMMUG00000011918 | CXCR4        | C-X-C Motif Chemokine Receptor 4                      | 0.04  | 1.25   | 0.39   | 0.11   | 4.08 | 4.28E-02 | -4.96 | 1.18E-02 | 0.34  | 9.64E-01 | EGA-1 |
| ENSMMUG00000018723 | GPATCH3      | G-patch Domain Containing 3                           | 0.30  | 9.25   | 1.13   | 2.21   | 4.05 | 5.34E-04 | -2.46 | 4.77E-02 | 0.85  | 7.59E-01 | EGA-1 |
| ENSMMUG00000003918 | DCAF8L1      | DDB1 And CUL4 Associated Factor 8 Like 1              | 0.95  | 7.41   | 12.13  | 0.23   | 4.02 | 2.98E-03 | -3.66 | 7.65E-03 | -0.72 | 8.40E-01 | EGA-1 |
| ENSMMUG00000013739 | RAI14        | Retinoic Acid Induced 14                              | 0.84  | 9.61   | 1.45   | 4.88   | 4.02 | 3.14E-07 | -3.70 | 3.51E-06 | 1.81  | 1.29E-01 | EGA-1 |
| ENSMMUG00000014789 | CD37         | CD37 Molecule                                         | 0.66  | 5.71   | 0.71   | 0.16   | 4.00 | 9.79E-03 | -6.48 | 3.33E-05 | 0.88  | 8.37E-01 | EGA-1 |
| ENSMMUG00000003165 |              |                                                       | 0.86  | 7.16   | 1.27   | 2.02   | 3.97 | 3.01E-03 | -3.55 | 8.24E-03 | 2.57  | 1.99E-01 | EGA-1 |
| ENSMMUG00000017776 |              |                                                       | 1.33  | 56.26  | 4.31   | 1.60   | 3.97 | 6.35E-04 | -2.76 | 2.20E-02 | 0.10  | 9.83E-01 | EGA-1 |
| ENSMMUG00000010826 | RGL3         | Ral Guanine Nucleotide Dissociation Stimulator Like 3 | 0.09  | 2.31   | 0.08   | 0.10   | 3.94 | 2.09E-02 | -6.04 | 4.48E-04 | -0.03 | 9.97E-01 | EGA-1 |
| ENSMMUG00000019606 | CGAS         | Cyclic GMP-AMP Synthase                               | 0.85  | 9.34   | 0.67   | 0.12   | 3.91 | 2.50E-04 | -5.06 | 1.79E-06 | -2.50 | 1.13E-01 | EGA-1 |
| ENSMMUG00000042663 |              |                                                       | 2.54  | 52.30  | 2.82   | 14.46  | 3.91 | 3.73E-03 | -3.17 | 2.33E-02 | 2.24  | 3.03E-01 | EGA-1 |
| ENSMMUG00000010078 |              |                                                       | 0.17  | 1.02   | 0.12   | 0.49   | 3.86 | 9.70E-03 | -5.19 | 5.45E-04 | 3.85  | 6.67E-02 | EGA-1 |

|                     |              |                                                      |       |        |       |       |      |          |        |          |       |          |       |
|---------------------|--------------|------------------------------------------------------|-------|--------|-------|-------|------|----------|--------|----------|-------|----------|-------|
| ENSMMUG00000014309  | ZNF280A      | Zinc Finger Protein 280A                             | 9.12  | 145.36 | 45.54 | 10.41 | 3.85 | 1.29E-09 | -2.16  | 1.39E-03 | -1.39 | 1.66E-01 | EGA-1 |
| ENSMMUG00000011094  | SLC16A6      | Solute Carrier Family 16 Member 6                    | 0.36  | 14.76  | 0.39  | 1.04  | 3.84 | 1.34E-02 | -4.36  | 4.12E-03 | 1.77  | 5.33E-01 | EGA-1 |
| ENSMMUG00000002727  | WBP1         | WW Domain Binding Protein 1                          | 0.59  | 9.07   | 4.28  | 2.71  | 3.81 | 1.44E-04 | -2.46  | 1.94E-02 | 0.17  | 9.66E-01 | EGA-1 |
| ENSMMUG00000003603  | TRIM41       | Tripartite Motif Containing 41                       | 1.09  | 27.50  | 2.39  | 2.59  | 3.78 | 2.96E-05 | -3.60  | 7.52E-05 | 1.25  | 4.54E-01 | EGA-1 |
| ENSMMUG000000045210 | LOC106996634 | Histone H4-like                                      | 10.42 | 167.21 | 35.13 | 25.99 | 3.75 | 6.79E-03 | -3.60  | 8.93E-03 | -0.45 | 9.12E-01 | EGA-1 |
| ENSMMUG00000010358  | SLC35F2      | Solute Carrier Family 35 Member F2                   | 2.90  | 49.23  | 12.58 | 14.78 | 3.74 | 5.73E-07 | -1.97  | 1.41E-02 | 0.53  | 7.80E-01 | EGA-1 |
| ENSMMUG000000047887 | ZNF154       | Zinc Finger Protein 154                              | 0.21  | 2.05   | 5.26  | 0.18  | 3.73 | 4.87E-03 | -4.10  | 2.25E-03 | 0.15  | 9.76E-01 | EGA-1 |
| ENSMMUG00000003819  |              |                                                      | 0.58  | 10.10  | 2.08  | 1.15  | 3.73 | 9.28E-05 | -2.80  | 4.69E-03 | -0.32 | 9.14E-01 | EGA-1 |
| ENSMMUG00000010496  | RBM19        | RNA Binding Motif Protein 19                         | 1.79  | 20.67  | 9.35  | 9.42  | 3.71 | 4.29E-09 | -1.41  | 4.66E-02 | 0.28  | 8.81E-01 | EGA-1 |
| ENSMMUG000000022116 | PIH1D1       | PIH1 Domain Containing 1                             | 0.69  | 6.88   | 0.95  | 3.88  | 3.70 | 3.92E-04 | -3.67  | 4.40E-04 | 2.77  | 5.16E-02 | EGA-1 |
| ENSMMUG00000004865  |              |                                                      | 1.08  | 15.82  | 2.80  | 3.10  | 3.65 | 5.90E-03 | -2.74  | 4.46E-02 | 1.49  | 5.47E-01 | EGA-1 |
| ENSMMUG00000018647  | KRT15        | Keratin 15                                           | 1.15  | 8.13   | 0.04  | 0.13  | 3.65 | 3.39E-02 | -10.65 | 8.78E-10 | 2.73  | 3.66E-01 | EGA-1 |
| ENSMMUG00000010202  | C11H12orf57  | Chromosome 11 Open Reading Frame, Human C12orf57     | 0.97  | 7.15   | 2.71  | 2.00  | 3.61 | 2.78E-02 | -3.58  | 2.92E-02 | 0.49  | 9.17E-01 | EGA-1 |
| ENSMMUG00000005962  | KLHL11       | Kelch Like Family Member 11                          | 3.09  | 37.55  | 16.80 | 4.64  | 3.61 | 1.97E-06 | -2.40  | 2.54E-03 | 0.00  | 1.00E+00 | EGA-1 |
| ENSMMUG000000029503 |              |                                                      | 0.45  | 7.23   | 0.44  | 1.10  | 3.61 | 3.20E-02 | -4.90  | 2.61E-03 | 2.51  | 3.48E-01 | EGA-1 |
| ENSMMUG00000000347  |              |                                                      | 2.38  | 28.82  | 10.25 | 10.83 | 3.57 | 1.54E-05 | -1.82  | 4.27E-02 | 0.73  | 6.96E-01 | EGA-1 |
| ENSMMUG00000015952  | KATNAL2      | Katanin Catalytic Subunit A1 Like 2                  | 0.69  | 3.65   | 0.14  | 0.85  | 3.55 | 4.02E-02 | -6.01  | 3.55E-04 | 3.63  | 1.64E-01 | EGA-1 |
| ENSMMUG00000002004  | CDKN2AIP     | CDKN2A Interacting Protein                           | 1.51  | 21.40  | 7.11  | 5.65  | 3.55 | 6.09E-05 | -2.18  | 1.98E-02 | 0.81  | 6.80E-01 | EGA-1 |
| ENSMMUG000000041919 | NRF1         | Nuclear Respiratory Factor 1                         | 0.54  | 6.17   | 1.25  | 2.47  | 3.53 | 1.15E-03 | -2.79  | 1.26E-02 | 2.20  | 1.88E-01 | EGA-1 |
| ENSMMUG00000004784  | LOC106999243 | Snurportin-1                                         | 4.64  | 50.05  | 18.39 | 11.04 | 3.51 | 3.47E-10 | -1.24  | 4.82E-02 | -1.15 | 2.06E-01 | EGA-1 |
| ENSMMUG000000039851 | LOC706446    | Uncharacterized LOC706446                            | 0.04  | 0.88   | 0.19  | 0.35  | 3.47 | 1.55E-02 | -2.94  | 3.84E-02 | 4.12  | 1.74E-02 | EGA-2 |
| ENSMMUG000000039015 | C4H6orf141   | Chromosome 4 Open Reading Frame, Human C6orf141      | 0.33  | 4.99   | 1.58  | 1.18  | 3.37 | 8.52E-03 | -3.37  | 8.29E-03 | -0.19 | 9.68E-01 | EGA-1 |
| ENSMMUG000000047277 |              |                                                      | 1.07  | 7.44   | 2.89  | 6.38  | 3.35 | 2.17E-04 | -2.62  | 4.95E-03 | 2.39  | 5.41E-02 | EGA-1 |
| ENSMMUG00000017765  | LOC703164    | Uncharacterized Protein C10orf68 Homolog             | 0.30  | 5.27   | 0.26  | 0.11  | 3.25 | 8.63E-03 | -5.14  | 2.36E-05 | 0.56  | 8.80E-01 | EGA-1 |
| ENSMMUG000000044331 | ZNF471       | Zinc Finger Protein 471                              | 0.42  | 5.22   | 1.21  | 0.59  | 3.21 | 2.79E-05 | -2.02  | 1.22E-02 | -1.71 | 1.35E-01 | EGA-1 |
| ENSMMUG00000014785  | SNRNP48      | Small Nuclear Ribonucleoprotein U11/U12 Subunit 48   | 2.20  | 15.87  | 8.69  | 5.00  | 3.20 | 3.98E-07 | -1.81  | 7.03E-03 | 0.17  | 9.41E-01 | EGA-1 |
| ENSMMUG00000011447  | EBF3         | Early B-cell Factor 3                                | 1.81  | 7.34   | 2.03  | 0.07  | 3.14 | 3.21E-02 | -9.78  | 2.56E-10 | 1.81  | 5.58E-01 | EGA-1 |
| ENSMMUG000000020898 |              |                                                      | 2.56  | 20.65  | 2.89  | 1.61  | 3.10 | 8.90E-03 | -5.30  | 2.01E-06 | 2.07  | 2.53E-01 | EGA-1 |
| ENSMMUG00000014697  | NFIB         | Nuclear Factor I B                                   | 0.24  | 2.22   | 0.32  | 0.14  | 3.09 | 1.47E-02 | -4.76  | 8.44E-05 | -0.33 | 9.36E-01 | EGA-1 |
| ENSMMUG000000021049 | LOC705507    | Ret Finger Protein-like 3                            | 5.05  | 38.59  | 9.82  | 2.26  | 3.09 | 3.27E-02 | -3.67  | 8.59E-03 | -1.57 | 5.54E-01 | EGA-1 |
| ENSMMUG00000019961  | PPP1R18      | Protein Phosphatase 1 Regulatory Subunit 18          | 0.17  | 3.44   | 0.10  | 1.10  | 3.08 | 2.56E-02 | -6.31  | 4.25E-06 | 4.10  | 1.79E-02 | EGA-2 |
| ENSMMUG000000032376 |              |                                                      | 1.97  | 11.23  | 2.27  | 0.62  | 3.06 | 4.88E-03 | -4.53  | 2.02E-05 | -0.39 | 9.07E-01 | EGA-1 |
| ENSMMUG000000020821 | TEX15        | Testis Expressed 15, Meiosis And Synapsis Associated | 0.51  | 4.65   | 0.52  | 0.05  | 3.02 | 4.06E-03 | -4.12  | 4.68E-05 | -1.72 | 3.19E-01 | EGA-1 |
| ENSMMUG000000021518 | CLCN7        | Chloride Voltage-gated Channel 7                     | 0.38  | 4.61   | 0.44  | 1.44  | 3.00 | 1.98E-02 | -3.78  | 2.66E-03 | 1.97  | 3.49E-01 | EGA-1 |

|                    |        |                                              |       |        |        |       |      |          |       |          |       |          |       |
|--------------------|--------|----------------------------------------------|-------|--------|--------|-------|------|----------|-------|----------|-------|----------|-------|
| ENSMMUG0000003955  | PGAP2  | Post-GPI Attachment To Proteins 2            | 3.36  | 27.14  | 3.02   | 3.53  | 2.96 | 1.69E-02 | -2.92 | 1.67E-02 | 1.29  | 5.80E-01 | EGA-1 |
| ENSMMUG00000023446 | TFIP11 | Tuftelin Interacting Protein 11              | 8.03  | 65.63  | 14.52  | 8.57  | 2.93 | 8.93E-06 | -2.05 | 2.84E-03 | -0.84 | 5.11E-01 | EGA-1 |
| ENSMMUG0000002368  | CCND1  | Cyclin D1                                    | 1.68  | 13.88  | 0.31   | 0.11  | 2.93 | 3.56E-02 | -6.70 | 1.72E-07 | 1.26  | 6.65E-01 | EGA-1 |
| ENSMMUG00000011391 | YTHDF2 | YTH N6-methyladenosine RNA Binding Protein 2 | 2.90  | 24.10  | 10.87  | 14.83 | 2.91 | 2.62E-06 | -1.48 | 2.79E-02 | 1.14  | 2.61E-01 | EGA-1 |
| ENSMMUG00000009049 | CFAP53 | Cilia And Flagella Associated Protein 53     | 0.77  | 5.41   | 1.59   | 0.59  | 2.89 | 4.04E-02 | -4.28 | 1.35E-03 | 0.80  | 8.10E-01 | EGA-1 |
| ENSMMUG00000041693 | LCLAT1 | Lysocardiolipin Acyltransferase 1            | 3.48  | 20.08  | 9.53   | 19.48 | 2.89 | 8.86E-10 | -1.55 | 1.99E-03 | 1.36  | 4.06E-02 | EGA-2 |
| ENSMMUG00000021760 | ZNF79  | Zinc Finger Protein 79                       | 1.01  | 6.12   | 0.73   | 0.78  | 2.88 | 2.91E-03 | -3.73 | 6.52E-05 | 1.17  | 5.13E-01 | EGA-1 |
| ENSMMUG00000029827 | CLIC1  | Chloride Intracellular Channel 1             | 2.47  | 20.44  | 5.84   | 30.45 | 2.83 | 5.18E-04 | -1.85 | 3.02E-02 | 2.27  | 3.45E-02 | EGA-2 |
| ENSMMUG00000015047 | MEIOC  | Meiosis Specific With Coiled-coil Domain     | 1.24  | 4.54   | 0.73   | 0.71  | 2.82 | 1.99E-02 | -4.23 | 2.39E-04 | 1.68  | 4.18E-01 | EGA-1 |
| ENSMMUG00000019932 | IRAK2  | Interleukin 1 Receptor Associated Kinase 2   | 0.36  | 3.00   | 1.47   | 0.21  | 2.81 | 1.37E-02 | -3.87 | 4.05E-04 | 0.56  | 8.50E-01 | EGA-1 |
| ENSMMUG00000015217 |        |                                              | 6.28  | 41.38  | 12.61  | 12.06 | 2.81 | 1.64E-03 | -2.77 | 1.92E-03 | 0.20  | 9.49E-01 | EGA-1 |
| ENSMMUG00000021315 | MOCS1  | Molybdenum Cofactor Synthesis 1              | 0.35  | 1.53   | 0.14   | 0.12  | 2.76 | 3.13E-02 | -3.59 | 4.80E-03 | -2.43 | 2.56E-01 | EGA-1 |
| ENSMMUG00000000387 | FRMD4B | FERM Domain Containing 4B                    | 3.68  | 18.44  | 4.26   | 2.60  | 2.76 | 4.62E-05 | -3.05 | 6.06E-06 | -0.29 | 8.85E-01 | EGA-1 |
| ENSMMUG00000019245 |        |                                              | 0.59  | 9.09   | 1.02   | 1.25  | 2.75 | 2.48E-02 | -2.53 | 3.92E-02 | 2.45  | 1.67E-01 | EGA-1 |
| ENSMMUG00000021324 | ARL4D  | ADP Ribosylation Factor Like GTPase 4D       | 3.03  | 20.67  | 3.50   | 0.56  | 2.75 | 8.85E-03 | -3.76 | 1.97E-04 | -2.27 | 1.34E-01 | EGA-1 |
| ENSMMUG00000009677 | MED16  | Mediator Complex Subunit 16                  | 1.97  | 8.28   | 2.98   | 4.19  | 2.73 | 1.01E-02 | -2.25 | 3.71E-02 | 0.60  | 8.13E-01 | EGA-1 |
| ENSMMUG00000021945 | EPS8L1 | EPS8 Like 1                                  | 0.30  | 6.65   | 0.42   | 1.08  | 2.67 | 2.69E-02 | -3.87 | 1.01E-03 | 0.42  | 9.03E-01 | EGA-1 |
| ENSMMUG00000005204 | VPS16  | VPS16, CORVET/HOPS Core Subunit              | 4.33  | 17.14  | 2.72   | 7.99  | 2.65 | 3.46E-02 | -2.70 | 2.78E-02 | 1.64  | 4.31E-01 | EGA-1 |
| ENSMMUG00000041753 | ZNF528 | Zinc Finger Protein 528                      | 1.52  | 8.43   | 4.05   | 1.56  | 2.63 | 5.52E-05 | -1.43 | 4.32E-02 | -1.29 | 2.09E-01 | EGA-1 |
| ENSMMUG00000002810 | TOX2   | TOX High Mobility Group Box Family Member 2  | 14.68 | 77.95  | 2.77   | 0.58  | 2.59 | 1.67E-02 | -5.02 | 4.55E-07 | -1.10 | 5.94E-01 | EGA-1 |
| ENSMMUG00000021284 | DBR1   | Debranching RNA Lariats 1                    | 3.58  | 30.70  | 7.94   | 4.33  | 2.57 | 9.08E-06 | -1.96 | 1.03E-03 | -0.49 | 7.15E-01 | EGA-1 |
| ENSMMUG00000008637 | WRAP53 | WD Repeat Containing Antisense To TP53       | 2.37  | 12.53  | 3.21   | 2.64  | 2.57 | 4.99E-03 | -2.92 | 1.20E-03 | 0.94  | 6.05E-01 | EGA-1 |
| ENSMMUG00000021891 | KLC3   | Kinesin Light Chain 3                        | 0.68  | 5.47   | 0.61   | 1.98  | 2.56 | 4.00E-02 | -2.90 | 1.69E-02 | 2.39  | 1.82E-01 | EGA-1 |
| ENSMMUG00000044452 |        |                                              | 0.74  | 8.55   | 0.92   | 0.83  | 2.54 | 3.27E-02 | -3.39 | 2.88E-03 | 2.27  | 1.94E-01 | EGA-1 |
| ENSMMUG00000003029 | PRMT1  | Protein Arginine Methyltransferase 1         | 3.71  | 16.54  | 4.60   | 7.01  | 2.50 | 1.98E-03 | -2.34 | 3.86E-03 | 0.64  | 7.26E-01 | EGA-1 |
| ENSMMUG00000001768 | ZNF616 | Zinc Finger Protein 616                      | 1.63  | 9.55   | 0.59   | 0.19  | 2.50 | 2.02E-02 | -3.89 | 1.30E-04 | -1.22 | 5.44E-01 | EGA-1 |
| ENSMMUG00000022767 | EEF2   | Eukaryotic Translation Elongation Factor 2   | 43.69 | 203.86 | 109.75 | 95.98 | 2.47 | 2.53E-12 | -1.09 | 4.34E-03 | -0.44 | 5.35E-01 | EGA-1 |
| ENSMMUG00000045137 | PCGF2  | Polycomb Group Ring Finger 2                 | 7.75  | 38.65  | 3.18   | 2.60  | 2.47 | 6.98E-03 | -4.82 | 1.52E-08 | 1.34  | 3.77E-01 | EGA-1 |

|                    |              |                                                                 |       |        |        |         |      |          |       |          |       |          |       |
|--------------------|--------------|-----------------------------------------------------------------|-------|--------|--------|---------|------|----------|-------|----------|-------|----------|-------|
| ENSMMUG00000021998 | MAML3        | Mastermind Like Transcriptional Coactivator 3                   | 1.52  | 4.54   | 2.28   | 6.33    | 2.45 | 4.30E-02 | -2.41 | 4.33E-02 | 2.34  | 1.64E-01 | EGA-1 |
| ENSMMUG00000003111 | CDC37        | Cell Division Cycle 37                                          | 11.61 | 84.55  | 54.66  | 25.35   | 2.43 | 9.26E-06 | -1.20 | 4.51E-02 | -0.09 | 9.68E-01 | EGA-1 |
| ENSMMUG00000018945 | CLNS1A       | Chloride Nucleotide-sensitive Channel 1A                        | 10.65 | 50.35  | 22.61  | 28.03   | 2.41 | 1.71E-03 | -1.67 | 3.67E-02 | 0.28  | 9.00E-01 | EGA-1 |
| ENSMMUG00000021673 | ZFP28        | ZFP28 Zinc Finger Protein                                       | 2.39  | 14.70  | 4.72   | 0.61    | 2.39 | 4.49E-02 | -4.39 | 5.66E-05 | -0.68 | 8.05E-01 | EGA-1 |
| ENSMMUG00000002970 | RSRP1        | Arginine And Serine Rich Protein 1                              | 6.29  | 35.51  | 9.12   | 9.51    | 2.39 | 3.19E-04 | -2.12 | 1.66E-03 | 0.10  | 9.69E-01 | EGA-1 |
| ENSMMUG00000010838 | ZNF473       | Zinc Finger Protein 473                                         | 5.86  | 30.03  | 7.04   | 4.10    | 2.38 | 1.89E-04 | -2.62 | 3.29E-05 | -0.27 | 8.81E-01 | EGA-1 |
| ENSMMUG00000001436 | LOC720381    | Zinc Finger Protein 665-like                                    | 4.18  | 15.78  | 5.74   | 1.75    | 2.37 | 1.11E-02 | -2.40 | 9.46E-03 | -0.50 | 8.29E-01 | EGA-1 |
| ENSMMUG00000040919 |              |                                                                 | 7.64  | 38.43  | 9.54   | 1.22    | 2.37 | 1.69E-02 | -2.46 | 1.24E-02 | -2.22 | 1.16E-01 | EGA-1 |
| ENSMMUG00000003611 | LDLR         | Low Density Lipoprotein Receptor                                | 1.05  | 3.54   | 0.79   | 3.38    | 2.36 | 2.44E-02 | -3.07 | 2.27E-03 | 2.47  | 7.13E-02 | EGA-1 |
| ENSMMUG00000042545 |              |                                                                 | 12.88 | 56.38  | 31.45  | 33.91   | 2.30 | 1.37E-05 | -1.15 | 4.65E-02 | -0.44 | 7.24E-01 | EGA-1 |
| ENSMMUG00000042014 | LOC697721    | Histone H4                                                      | ##### | #####  | 347.97 | 111.86  | 2.29 | 2.44E-04 | -2.43 | 8.88E-05 | -1.81 | 2.67E-02 | EGA-3 |
| ENSMMUG00000008376 | KIAA1217     | KIAA1217 Ortholog                                               | 0.33  | 0.69   | 0.30   | 4.99    | 2.27 | 9.03E-03 | -3.96 | 3.03E-06 | 6.43  | 7.46E-14 | EGA-2 |
| ENSMMUG00000007900 | SCNM1        | Sodium Channel Modifier 1                                       | 13.22 | 78.19  | 29.06  | 12.16   | 2.27 | 1.39E-03 | -1.73 | 1.74E-02 | -0.70 | 6.27E-01 | EGA-1 |
| ENSMMUG00000004645 | C5H4orf46    | Chromosome 5 Open Reading Frame, Human C4orf46                  | 1.98  | 6.64   | 2.53   | 4.32    | 2.23 | 1.02E-02 | -2.07 | 1.74E-02 | 0.84  | 6.23E-01 | EGA-1 |
| ENSMMUG00000014163 | TICAM1       | Toll Like Receptor Adaptor Molecule 1                           | 4.68  | 21.33  | 3.28   | 2.79    | 2.18 | 3.92E-02 | -4.38 | 5.72E-06 | 1.96  | 1.90E-01 | EGA-1 |
| ENSMMUG00000008133 | SLC17A5      | Solute Carrier Family 17 Member 5                               | 0.29  | 1.36   | 0.55   | 1.68    | 2.15 | 1.14E-02 | -2.13 | 1.26E-02 | 2.08  | 6.54E-02 | EGA-1 |
| ENSMMUG00000008418 | DNALI1       | Dynein Axonemal Light Intermediate Chain 1                      | 1.28  | 7.21   | 0.60   | 0.38    | 2.14 | 1.98E-02 | -3.44 | 7.49E-05 | -0.86 | 6.47E-01 | EGA-1 |
| ENSMMUG00000018286 |              |                                                                 | 3.94  | 17.51  | 4.32   | 0.49    | 2.10 | 4.68E-02 | -2.11 | 4.34E-02 | -1.81 | 2.57E-01 | EGA-1 |
| ENSMMUG00000015285 |              |                                                                 | 21.75 | 132.32 | 25.94  | 16.23   | 2.05 | 4.96E-03 | -2.13 | 3.24E-03 | -0.03 | 9.92E-01 | EGA-1 |
| ENSMMUG00000041916 | SNIP1        | Smad Nuclear Interacting Protein 1                              | 3.45  | 14.72  | 6.17   | 4.00    | 2.02 | 8.45E-04 | -1.88 | 1.96E-03 | 0.47  | 7.32E-01 | EGA-1 |
| ENSMMUG00000022979 | TPT1         | Tumor Protein, Translationally-controlled 1                     | ##### | #####  | #####  | 1362.00 | 2.00 | 6.76E-11 | -0.83 | 1.29E-02 | -0.21 | 7.91E-01 | EGA-1 |
| ENSMMUG00000001321 | SEPT9        | Septin 9                                                        | 1.62  | 6.88   | 2.29   | 13.50   | 1.99 | 4.53E-02 | -3.67 | 5.52E-05 | 4.96  | 6.68E-07 | EGA-2 |
| ENSMMUG00000021678 |              |                                                                 | 16.95 | 73.64  | 18.07  | 3.11    | 1.96 | 1.38E-03 | -2.58 | 1.37E-05 | -2.21 | 2.38E-03 | EGA-3 |
| ENSMMUG00000001192 | LMNB2        | Lamin B2                                                        | 8.85  | 33.98  | 7.97   | 12.65   | 1.93 | 2.80E-02 | -2.31 | 5.94E-03 | 1.07  | 4.75E-01 | EGA-1 |
| ENSMMUG00000000314 | RAPH1        | Ras Association (RalGDS/AF-6) And Pleckstrin Homology Domains 1 | 8.89  | 33.61  | 15.51  | 7.86    | 1.87 | 7.29E-05 | -1.50 | 1.99E-03 | -0.42 | 6.89E-01 | EGA-1 |
| ENSMMUG00000010122 | CSNK1E       | Casein Kinase 1, Epsilon                                        | 17.03 | 66.02  | 9.79   | 6.45    | 1.85 | 2.29E-02 | -3.44 | 3.97E-06 | 0.71  | 6.62E-01 | EGA-1 |
| ENSMMUG00000021026 |              |                                                                 | 57.41 | 237.32 | 100.01 | 68.10   | 1.84 | 8.93E-06 | -1.54 | 2.68E-04 | -0.17 | 8.95E-01 | EGA-1 |
| ENSMMUG00000003390 | PRR11        | Proline Rich 11                                                 | 4.98  | 15.45  | 7.19   | 6.80    | 1.81 | 2.46E-04 | -1.37 | 7.09E-03 | 0.39  | 7.29E-01 | EGA-1 |
| ENSMMUG00000018069 | DCAF16       | DDB1 And CUL4 Associated Factor 16                              | 5.00  | 12.07  | 4.60   | 3.98    | 1.81 | 2.27E-03 | -2.20 | 1.37E-04 | 0.09  | 9.69E-01 | EGA-1 |
| ENSMMUG00000040506 | LOC107000817 | Histone H2B Type 2-F-like                                       | ##### | 299.88 | 100.98 | 112.74  | 1.78 | 4.23E-02 | -1.90 | 2.65E-02 | -0.70 | 6.98E-01 | EGA-1 |
| ENSMMUG00000013514 | KMT5A        | Lysine Methyltransferase 5A                                     | 13.89 | 59.63  | 21.16  | 21.40   | 1.77 | 3.00E-03 | -1.78 | 2.70E-03 | 0.77  | 4.73E-01 | EGA-1 |
| ENSMMUG00000000869 |              |                                                                 | 14.36 | 51.43  | 22.29  | 22.32   | 1.75 | 2.11E-02 | -1.59 | 3.72E-02 | 0.54  | 7.49E-01 | EGA-1 |
| ENSMMUG00000019995 | AKT3         | AKT Serine/threonine Kinase 3                                   | 35.35 | 113.90 | 53.03  | 12.28   | 1.74 | 6.14E-04 | -1.60 | 1.70E-03 | -1.45 | 2.86E-02 | EGA-3 |



|                    |           |                                                   |       |        |        |        |      |          |       |          |       |          |       |
|--------------------|-----------|---------------------------------------------------|-------|--------|--------|--------|------|----------|-------|----------|-------|----------|-------|
| ENSMMUG00000012965 | EYA3      | EYA Transcriptional Coactivator And Phosphatase 3 | 10.58 | 32.07  | 12.38  | 6.95   | 1.73 | 5.22E-07 | -2.06 | 1.97E-09 | -0.25 | 7.75E-01 | EGA-1 |
| ENSMMUG00000004762 | WDTC1     | WD And Tetratricopeptide Repeats 1                | 16.44 | 54.18  | 11.17  | 8.91   | 1.72 | 6.37E-03 | -2.18 | 3.13E-04 | -0.83 | 4.46E-01 | EGA-1 |
| ENSMMUG00000008045 | AGO2      | Argonaute 2, RISC Catalytic Component             | 12.51 | 36.81  | 14.61  | 9.55   | 1.71 | 2.87E-03 | -1.61 | 4.93E-03 | -0.56 | 6.27E-01 | EGA-1 |
| ENSMMUG00000000868 | SLC30A1   | Solute Carrier Family 30 Member 1                 | 10.96 | 37.00  | 20.47  | 24.97  | 1.65 | 4.80E-03 | -1.19 | 4.90E-02 | 0.94  | 3.12E-01 | EGA-1 |
| ENSMMUG00000023075 | SLU7      | SLU7 Homolog, Splicing Factor                     | 17.43 | 62.62  | 25.41  | 11.65  | 1.64 | 6.55E-03 | -1.43 | 1.79E-02 | -1.08 | 2.36E-01 | EGA-1 |
| ENSMMUG00000008033 | IFRD1     | Interferon Related Developmental Regulator 1      | 13.25 | 41.14  | 18.13  | 6.26   | 1.63 | 1.49E-03 | -1.08 | 4.65E-02 | -1.69 | 7.76E-03 | EGA-3 |
| ENSMMUG00000016903 |           |                                                   | ##### | 407.30 | 173.63 | 133.89 | 1.61 | 1.07E-02 | -1.37 | 3.15E-02 | 0.12  | 9.60E-01 | EGA-1 |
| ENSMMUG00000002542 | CSTF3     | Cleavage Stimulation Factor Subunit 3             | 12.25 | 37.55  | 19.58  | 29.10  | 1.60 | 4.43E-03 | -1.37 | 1.60E-02 | 1.10  | 1.85E-01 | EGA-1 |
| ENSMMUG00000018256 | KPNA2     | Karyopherin Subunit Alpha 2                       | 83.39 | 207.56 | 100.22 | 56.05  | 1.56 | 2.76E-05 | -1.51 | 5.60E-05 | -0.53 | 4.32E-01 | EGA-1 |
| ENSMMUG00000016685 | LOC718406 | Importin Subunit Alpha-1-like                     | 51.40 | 124.68 | 56.91  | 29.24  | 1.53 | 2.47E-04 | -1.81 | 9.94E-06 | -0.42 | 6.22E-01 | EGA-1 |
| ENSMMUG00000006363 | MAD2L1BP  | MAD2L1 Binding Protein                            | 5.41  | 13.04  | 4.22   | 2.40   | 1.53 | 4.98E-02 | -2.14 | 3.39E-03 | -0.57 | 7.29E-01 | EGA-1 |
| ENSMMUG00000004956 | RSRC1     | Arginine And Serine Rich Coiled-coil 1            | 20.63 | 64.14  | 21.41  | 19.75  | 1.51 | 8.97E-03 | -1.63 | 3.96E-03 | -0.09 | 9.68E-01 | EGA-1 |
| ENSMMUG00000003469 | LOC707320 | Ubiquitin-conjugating Enzyme E2 C-like            | 61.64 | 166.76 | 55.91  | 38.37  | 1.49 | 2.67E-02 | -2.54 | 4.42E-05 | 0.34  | 8.38E-01 | EGA-1 |
| ENSMMUG00000021023 | UBE2C     | Ubiquitin Conjugating Enzyme E2 C                 | 88.54 | 247.32 | 84.48  | 51.89  | 1.49 | 1.22E-02 | -2.35 | 2.30E-05 | 0.11  | 9.59E-01 | EGA-1 |
| ENSMMUG00000000966 | TPX2      | TPX2, Microtubule Nucleation Factor               | 23.91 | 58.99  | 26.30  | 20.17  | 1.45 | 1.04E-03 | -1.51 | 5.56E-04 | 0.34  | 7.36E-01 | EGA-1 |
| ENSMMUG00000031435 | LOC714349 | Ubiquitin-conjugating Enzyme E2 C                 | ##### | 338.63 | 105.15 | 79.40  | 1.43 | 3.67E-02 | -2.47 | 8.24E-05 | 0.28  | 8.76E-01 | EGA-1 |
| ENSMMUG00000015522 | GRAMD1B   | GRAM Domain Containing 1B                         | 14.62 | 41.50  | 1.24   | 4.24   | 1.42 | 4.48E-02 | -6.07 | 3.74E-23 | 2.63  | 7.21E-04 | EGA-2 |
| ENSMMUG00000005145 |           |                                                   | 10.82 | 20.55  | 9.05   | 11.23  | 1.39 | 2.09E-02 | -1.63 | 4.95E-03 | 0.66  | 5.48E-01 | EGA-1 |
| ENSMMUG00000049232 | AMMECR1L  | AMMECR1 Like                                      | 6.73  | 18.65  | 6.23   | 5.73   | 1.38 | 1.78E-02 | -1.39 | 1.49E-02 | -0.43 | 7.34E-01 | EGA-1 |
| ENSMMUG00000022199 | PHC3      | Polyhomeotic Homolog 3                            | 8.39  | 24.35  | 8.78   | 4.07   | 1.38 | 2.82E-02 | -1.49 | 1.46E-02 | -0.93 | 3.46E-01 | EGA-1 |
| ENSMMUG00000010107 | DOT1L     | DOT1 Like Histone Lysine Methyltransferase        | 13.34 | 27.73  | 14.94  | 11.79  | 1.36 | 1.14E-03 | -1.22 | 3.92E-03 | -0.64 | 3.58E-01 | EGA-1 |
| ENSMMUG00000008139 | HNRNPUL1  | Heterogeneous Nuclear Ribonucleoprotein U Like 1  | 59.04 | 142.35 | 55.79  | 39.28  | 1.33 | 9.70E-03 | -1.80 | 2.33E-04 | -0.15 | 9.22E-01 | EGA-1 |
| ENSMMUG00000003921 | KIAA1191  | KIAA1191 Ortholog                                 | 75.89 | 218.46 | 54.15  | 8.04   | 1.31 | 3.67E-02 | -2.97 | 1.62E-07 | -1.84 | 1.31E-02 | EGA-3 |
| ENSMMUG00000030170 | TMEM209   | Transmembrane Protein 209                         | 28.09 | 79.31  | 34.28  | 24.00  | 1.29 | 1.09E-03 | -0.94 | 2.17E-02 | -0.86 | 1.34E-01 | EGA-1 |
| ENSMMUG00000011523 | TAF5      | TATA-box Binding Protein Associated Factor 5      | 5.26  | 16.11  | 5.80   | 2.72   | 1.27 | 3.47E-02 | -1.60 | 5.21E-03 | -0.79 | 4.31E-01 | EGA-1 |
| ENSMMUG00000044817 | NUP62     | Nucleoporin 62                                    | 54.43 | 128.61 | 42.57  | 24.84  | 1.23 | 2.10E-02 | -1.61 | 1.50E-03 | -1.15 | 1.10E-01 | EGA-1 |
| ENSMMUG00000021478 | RIOK3     | RIO Kinase 3                                      | 44.92 | 92.11  | 25.22  | 15.18  | 1.20 | 4.44E-02 | -2.40 | 9.62E-06 | -0.41 | 7.56E-01 | EGA-1 |
| ENSMMUG00000003164 | GATAD2A   | GATA Zinc Finger Domain Containing 2A             | 47.76 | 115.98 | 47.54  | 39.30  | 1.17 | 1.11E-02 | -1.44 | 1.19E-03 | 0.14  | 9.20E-01 | EGA-1 |

|                    |           |                                               |       |        |        |        |      |          |       |          |       |          |       |
|--------------------|-----------|-----------------------------------------------|-------|--------|--------|--------|------|----------|-------|----------|-------|----------|-------|
| ENSMMUG00000031224 | CSNK2A1   | Casein Kinase 2 Alpha 1                       | 60.13 | 127.65 | 50.40  | 34.01  | 1.11 | 3.27E-02 | -1.66 | 6.74E-04 | -0.59 | 5.16E-01 | EGA-1 |
| ENSMMUG00000008155 | POU2F1    | POU Class 2 Homeobox 1                        | 10.52 | 23.28  | 13.84  | 17.37  | 1.10 | 4.10E-03 | -0.82 | 3.79E-02 | 0.07  | 9.59E-01 | EGA-1 |
| ENSMMUG00000028781 | ZNF850    | Zinc Finger Protein 850                       | 21.41 | 47.43  | 25.58  | 27.34  | 1.09 | 1.26E-02 | -1.09 | 1.18E-02 | 0.18  | 8.74E-01 | EGA-1 |
| ENSMMUG00000008149 | ILF2      | Interleukin Enhancer Binding Factor 2         | 52.46 | 111.30 | 55.51  | 59.75  | 1.08 | 4.21E-02 | -1.04 | 4.77E-02 | 0.35  | 7.66E-01 | EGA-1 |
| ENSMMUG00000045683 |           |                                               | 10.80 | 20.70  | 12.94  | 7.81   | 1.07 | 4.45E-02 | -1.10 | 3.83E-02 | -0.51 | 6.26E-01 | EGA-1 |
| ENSMMUG00000022606 | SF1       | Splicing Factor 1                             | 15.39 | 28.29  | 18.20  | 19.94  | 1.07 | 1.42E-02 | -0.92 | 3.54E-02 | 0.27  | 7.96E-01 | EGA-1 |
| ENSMMUG00000005352 | USP36     | Ubiquitin Specific Peptidase 36               | 16.26 | 33.67  | 10.94  | 5.59   | 1.06 | 4.68E-02 | -2.11 | 1.28E-05 | -0.70 | 4.26E-01 | EGA-1 |
| ENSMMUG00000008827 | API5      | Apoptosis Inhibitor 5                         | 54.82 | 126.12 | 60.06  | 39.42  | 1.04 | 4.33E-04 | -1.16 | 6.40E-05 | -0.16 | 8.37E-01 | EGA-1 |
| ENSMMUG00000018954 | RBM42     | RNA Binding Motif Protein 42                  | 9.15  | 18.17  | 10.07  | 10.38  | 1.02 | 1.12E-02 | -0.97 | 1.52E-02 | -0.11 | 9.32E-01 | EGA-1 |
| ENSMMUG00000005684 | TNPO2     | Transportin 2                                 | 12.96 | 29.84  | 13.15  | 9.99   | 0.99 | 1.24E-02 | -1.53 | 3.79E-05 | 0.11  | 9.23E-01 | EGA-1 |
| ENSMMUG00000013664 | PPP1CC    | Protein Phosphatase 1 Catalytic Subunit Gamma | 95.17 | 162.32 | 98.34  | 48.19  | 0.96 | 2.81E-02 | -1.21 | 3.58E-03 | -0.21 | 8.48E-01 | EGA-1 |
| ENSMMUG00000011769 | PSMD1     | Proteasome 26S Subunit, Non-ATPase 1          | 34.16 | 66.35  | 41.26  | 52.21  | 0.94 | 7.23E-04 | -0.66 | 2.28E-02 | 0.52  | 2.31E-01 | EGA-1 |
| ENSMMUG00000020285 | RAD21     | RAD21 Cohesin Complex Component               | 70.50 | 122.38 | 86.07  | 65.58  | 0.82 | 1.94E-02 | -0.77 | 2.68E-02 | -0.32 | 6.45E-01 | EGA-1 |
| ENSMMUG00000009788 | TUBA1A    | Tubulin Alpha 1a                              | ##### | 337.58 | 169.33 | 129.27 | 0.78 | 4.76E-02 | -0.93 | 1.40E-02 | -0.32 | 6.92E-01 | EGA-1 |
| ENSMMUG00000009987 | GON4L     | Gon-4 Like                                    | 25.04 | 38.13  | 16.60  | 11.54  | 0.73 | 1.75E-02 | -1.06 | 2.63E-04 | -0.74 | 6.72E-02 | EGA-1 |
| ENSMMUG00000018075 | LOC719288 | GON-4-like Protein                            | 86.85 | 141.61 | 55.34  | 34.30  | 0.72 | 4.10E-02 | -1.24 | 1.27E-04 | -0.65 | 1.90E-01 | EGA-1 |

a) FPKM: Fragments Per Kilobase of transcript per Million mapped reads.

b) L2FC: Log fold change of base 2.

c) FDR: False discovery rate. Adjusted p-value using the Benjamin-Hochberg method.
