# Supplementary material
Source: PubMed Central journal article supplement (PMC6417155)
Supplement: gaz001_schall_et_al._table_s4.pdf [file gaz001_schall_et_al._table_s4.pdf]

Table S4 - EGA2 super-group DEGs

| Ensembl ID          | Symbol    | GeneName                                                 | FPKM <sup>a</sup> |        |        |            | MII:8-Cell        |                  | 8-Cell:Morula |          | Morula:Blast |          | Sub-Group |
|---------------------|-----------|----------------------------------------------------------|-------------------|--------|--------|------------|-------------------|------------------|---------------|----------|--------------|----------|-----------|
|                     |           |                                                          | MII               | 8Cell  | Morula | Exp. Blast | L2FC <sup>b</sup> | FDR <sup>c</sup> | L2FC          | FDR      | L2FC         | FDR      |           |
| ENSMMUG00000015800  | NOC2L     | NOC2 Like Nucleolar Associated Transcriptional Repressor | 1.61              | 15.32  | 8.50   | 5.79       | 3.29              | 1.64E-04         | -0.68         | 5.48E-01 | -0.62        | 7.68E-01 | EGA2-1    |
| ENSMMUG00000001549  | LOC702125 | ATPase Family AAA Domain-containing Protein 3A           | 0.12              | 4.53   | 12.36  | 12.81      | 6.08              | 2.84E-09         | 1.71          | 1.36E-01 | 0.54         | 8.46E-01 | EGA2-1    |
| ENSMMUG000000042613 | KLHL21    | Kelch Like Family Member 21                              | 0.13              | 4.96   | 1.91   | 1.30       | 4.53              | 8.61E-05         | -1.58         | 2.42E-01 | -0.18        | 9.68E-01 | EGA2-1    |
| ENSMMUG00000030440  | LOC698665 | Ankyrin Repeat Domain-containing Protein 20A4-like       | 0.77              | 13.00  | 19.11  | 5.16       | 4.15              | 8.67E-06         | 0.12          | 9.41E-01 | -1.80        | 2.23E-01 | EGA2-1    |
| ENSMMUG00000007456  | TARDBP    | TAR DNA Binding Protein                                  | 21.71             | 71.84  | 56.78  | 43.21      | 1.74              | 1.83E-02         | -0.53         | 5.52E-01 | -0.15        | 9.52E-01 | EGA2-1    |
| ENSMMUG00000019321  | SRM       | Spermidine Synthase                                      | 10.52             | 69.22  | 116.92 | 140.24     | 2.49              | 3.99E-03         | 0.61          | 5.74E-01 | 0.33         | 8.94E-01 | EGA2-1    |
| ENSMMUG00000019322  | EXOSC10   | Exosome Component 10                                     | 32.87             | 55.43  | 57.68  | 35.33      | 0.85              | 2.86E-02         | 0.06          | 9.22E-01 | -0.75        | 1.74E-01 | EGA2-1    |
| ENSMMUG00000012469  | KIAA2013  | KIAA2013 Ortholog                                        | 8.17              | 42.83  | 22.72  | 24.21      | 2.16              | 2.28E-02         | -1.23         | 2.32E-01 | 0.97         | 5.82E-01 | EGA2-1    |
| ENSMMUG00000023449  | MFN2      | Mitofusin 2                                              | 39.21             | 96.24  | 86.89  | 50.97      | 1.05              | 2.56E-02         | -0.12         | 8.56E-01 | -0.94        | 1.49E-01 | EGA2-1    |
| ENSMMUG000000041024 | LOC715996 | PRAME Family Member 25                                   | 0.10              | 81.86  | 21.78  | 2.57       | 9.19              | 1.24E-20         | -2.13         | 5.69E-02 | -2.38        | 1.18E-01 | EGA2-1    |
| ENSMMUG00000008026  | SPEN      | Spen Family Transcriptional Repressor                    | 1.12              | 14.19  | 21.46  | 19.66      | 3.87              | 2.09E-06         | 0.58          | 5.94E-01 | 0.26         | 9.20E-01 | EGA2-1    |
| ENSMMUG00000010970  | HNRNPR    | Heterogeneous Nuclear Ribonucleoprotein R                | 14.58             | 44.09  | 36.32  | 35.20      | 1.45              | 4.45E-02         | 0.11          | 9.19E-01 | -0.20        | 9.26E-01 | EGA2-1    |
| ENSMMUG00000002445  | LOC705400 | 60S Ribosomal Protein L11-like                           | 95.60             | 298.05 | 418.43 | 402.27     | 1.72              | 2.12E-06         | 0.54          | 2.05E-01 | 0.03         | 9.83E-01 | EGA2-1    |
| ENSMMUG00000003173  | ELOA      | Elongin A                                                | 4.37              | 29.90  | 14.24  | 11.96      | 2.68              | 3.41E-07         | -0.98         | 1.01E-01 | -0.22        | 8.87E-01 | EGA2-1    |
| ENSMMUG00000019551  | LYPLA2    | Lysophospholipase II                                     | 0.49              | 3.31   | 1.69   | 6.13       | 2.82              | 4.89E-02         | -1.33         | 4.07E-01 | 1.25         | 6.49E-01 | EGA2-1    |
| ENSMMUG000000038340 |           |                                                          | 0.23              | 0.60   | 1.17   | 0.67       | 4.07              | 6.86E-03         | -0.98         | 5.94E-01 | 0.37         | 9.40E-01 | EGA2-1    |
| ENSMMUG00000013783  | PNRC2     | Proline Rich Nuclear Receptor Coactivator 2              | 5.37              | 23.73  | 15.93  | 23.79      | 2.50              | 5.83E-08         | -1.01         | 5.01E-02 | 0.83         | 2.82E-01 | EGA2-1    |
| ENSMMUG000000047959 |           |                                                          | 0.96              | 7.66   | 13.15  | 20.90      | 3.36              | 1.86E-02         | -0.13         | 9.52E-01 | 0.71         | 8.39E-01 | EGA2-1    |
| ENSMMUG000000037652 | LOC719289 | 40S Ribosomal Protein S27-like                           | 20.32             | 91.07  | 152.40 | 156.25     | 2.21              | 2.22E-06         | 0.61          | 2.75E-01 | 0.23         | 8.58E-01 | EGA2-1    |
| ENSMMUG00000006645  | SRRM1     | Serine And Arginine Repetitive Matrix 1                  | 12.56             | 88.52  | 95.20  | 76.98      | 2.47              | 3.77E-11         | 0.32          | 5.29E-01 | -0.07        | 9.66E-01 | EGA2-1    |
| ENSMMUG000000039842 |           |                                                          | 0.90              | 9.24   | 15.87  | 19.53      | 3.76              | 4.85E-07         | 0.16          | 8.93E-01 | 0.27         | 9.06E-01 | EGA2-1    |
| ENSMMUG00000019986  |           |                                                          | 7.42              | 67.01  | 58.54  | 29.11      | 3.35              | 2.22E-08         | -0.36         | 6.69E-01 | -0.76        | 5.20E-01 | EGA2-1    |
| ENSMMUG000000045223 | FAM110D   | Family With Sequence Similarity 110 Member D             | 0.01              | 2.20   | 0.61   | 0.05       | 6.98              | 4.49E-04         | -3.26         | 1.37E-01 | -2.40        | 5.51E-01 | EGA2-1    |
| ENSMMUG000000044953 | LIN28A    | Lin-28 Homolog A                                         | 0.08              | 44.80  | 50.43  | 42.75      | 9.14              | 4.34E-29         | -0.24         | 8.46E-01 | -0.32        | 8.98E-01 | EGA2-1    |
| ENSMMUG00000013855  | SFN       | Stratifin                                                | 0.07              | 6.26   | 1.21   | 5.37       | 6.11              | 1.63E-04         | -1.17         | 5.55E-01 | -0.88        | 8.30E-01 | EGA2-1    |
| ENSMMUG000000021031 | TRNP1     | TMF1-regulated Nuclear Protein 1                         | 0.17              | 1.47   | 2.67   | 2.83       | 3.69              | 2.63E-03         | 0.50          | 7.65E-01 | 0.67         | 8.25E-01 | EGA2-1    |
| ENSMMUG00000018678  | ATPIF1    | ATPase Inhibitory Factor 1                               | 14.08             | 49.18  | 24.46  | 35.91      | 1.47              | 2.74E-02         | -0.90         | 2.08E-01 | 0.72         | 5.54E-01 | EGA2-1    |
| ENSMMUG00000019216  | PHACTR4   | Phosphatase And Actin Regulator 4                        | 7.27              | 24.82  | 13.09  | 7.59       | 1.41              | 2.57E-02         | -0.38         | 6.22E-01 | -0.49        | 7.12E-01 | EGA2-1    |
| ENSMMUG00000018338  | RCC1      | Regulator Of Chromosome Condensation 1                   | 2.95              | 22.12  | 18.01  | 11.32      | 2.80              | 8.11E-03         | -0.78         | 5.49E-01 | 0.07         | 9.86E-01 | EGA2-1    |
| ENSMMUG00000006561  | TRNAU1AP  | TRNA Selenocysteine 1 Associated Protein 1               | 1.08              | 9.61   | 19.26  | 23.94      | 4.17              | 2.01E-08         | -0.20         | 8.66E-01 | 0.10         | 9.74E-01 | EGA2-1    |
| ENSMMUG00000015580  | TXLNA     | Taxilin Alpha                                            | 1.02              | 14.24  | 15.56  | 7.86       | 4.02              | 4.48E-06         | -0.63         | 5.89E-01 | -0.89        | 6.35E-01 | EGA2-1    |
| ENSMMUG00000006119  | EIF3I     | Eukaryotic Translation Initiation Factor 3 Subunit I     | 8.35              | 52.37  | 56.17  | 48.35      | 2.98              | 4.96E-05         | -0.28         | 7.95E-01 | 0.61         | 7.16E-01 | EGA2-1    |
| ENSMMUG000000046522 |           |                                                          | 0.42              | 5.89   | 1.81   | 5.18       | 3.47              | 2.60E-02         | -2.07         | 2.14E-01 | 3.64         | 7.67E-02 | EGA2-1    |
| ENSMMUG00000009948  | HDAC1     | Histone Deacetylase 1                                    | 3.58              | 41.27  | 22.78  | 26.67      | 4.11              | 3.34E-10         | -1.22         | 1.08E-01 | 0.45         | 7.91E-01 | EGA2-1    |

|                    |           |                                               |        |        |        |        |      |          |       |          |       |          |        |
|--------------------|-----------|-----------------------------------------------|--------|--------|--------|--------|------|----------|-------|----------|-------|----------|--------|
| ENSMMUG00000047454 | SYNC      | Syncoilin, Intermediate Filament Protein      | 0.13   | 3.87   | 0.57   | 0.94   | 3.48 | 1.24E-02 | -2.59 | 7.38E-02 | 3.52  | 6.50E-02 | EGA2-1 |
| ENSMMUG00000016479 | ZMYM1     | Zinc Finger MYM-type Containing 1             | 0.51   | 5.06   | 5.64   | 10.20  | 3.03 | 2.88E-03 | 0.51  | 7.12E-01 | 0.67  | 7.80E-01 | EGA2-1 |
| ENSMMUG00000032194 |           |                                               | 3.03   | 42.91  | 37.05  | 33.68  | 3.26 | 1.82E-03 | 0.81  | 5.35E-01 | -0.57 | 8.29E-01 | EGA2-1 |
| ENSMMUG00000019154 | SFPQ      | Splicing Factor Proline And Glutamine Rich    | 18.68  | 42.43  | 38.34  | 49.79  | 1.27 | 2.36E-03 | 0.03  | 9.62E-01 | -0.18 | 8.76E-01 | EGA2-1 |
| ENSMMUG00000043924 |           |                                               | 24.25  | 63.47  | 58.26  | 126.09 | 1.81 | 3.00E-02 | -1.27 | 1.42E-01 | 1.48  | 2.19E-01 | EGA2-1 |
| ENSMMUG00000003343 | AGO4      | Argonaute 4, RISC Catalytic Component         | 0.23   | 2.11   | 0.57   | 0.47   | 3.90 | 3.66E-07 | -1.55 | 7.23E-02 | -1.35 | 2.99E-01 | EGA2-1 |
| ENSMMUG00000014622 | THRAP3    | Thyroid Hormone Receptor Associated Protein 3 | 6.24   | 41.23  | 35.23  | 40.00  | 2.61 | 3.05E-06 | 0.09  | 9.27E-01 | 0.20  | 9.06E-01 | EGA2-1 |
| ENSMMUG00000008419 | GNL2      | G Protein Nucleolar 2                         | 30.67  | 96.15  | 69.26  | 34.31  | 1.40 | 4.03E-03 | -0.24 | 7.10E-01 | -0.55 | 5.48E-01 | EGA2-1 |
| ENSMMUG00000022040 | MANEAL    | Mannosidase Endo-alpha Like                   | 0.01   | 3.34   | 0.72   | 0.66   | 6.15 | 6.82E-03 | -1.56 | 5.60E-01 | -1.05 | 8.52E-01 | EGA2-1 |
| ENSMMUG00000043836 | LOC696544 | 40S Ribosomal Protein S10 Pseudogene          | 3.91   | 25.71  | 19.59  | 13.70  | 2.66 | 4.18E-04 | -0.58 | 5.48E-01 | -0.41 | 8.35E-01 | EGA2-1 |
| ENSMMUG00000014138 | FOXJ3     | Forkhead Box J3                               | 4.11   | 14.69  | 10.95  | 6.19   | 1.69 | 6.35E-04 | -0.24 | 7.25E-01 | -0.67 | 4.51E-01 | EGA2-1 |
| ENSMMUG00000013136 | YBX1      | Y-box Binding Protein 1                       | 112.54 | 647.72 | 541.82 | 382.63 | 2.39 | 1.52E-12 | -0.44 | 3.05E-01 | -0.35 | 6.48E-01 | EGA2-1 |
| ENSMMUG00000002640 | EBNA1BP2  | EBNA1 Binding Protein 2                       | 4.14   | 34.20  | 30.87  | 18.84  | 3.06 | 4.41E-07 | -0.15 | 8.75E-01 | -0.56 | 6.85E-01 | EGA2-1 |
| ENSMMUG00000015150 | DPH2      | DPH2 Homolog                                  | 0.28   | 7.86   | 4.89   | 3.15   | 4.98 | 6.26E-07 | -0.82 | 5.33E-01 | 0.11  | 9.76E-01 | EGA2-1 |
| ENSMMUG00000012993 | HECTD3    | HECT Domain E3 Ubiquitin Protein Ligase 3     | 2.67   | 10.31  | 20.61  | 19.79  | 2.00 | 6.52E-03 | 0.49  | 5.97E-01 | 0.06  | 9.83E-01 | EGA2-1 |
| ENSMMUG00000020078 | HPDL      | 4-hydroxyphenylpyruvate Dioxygenase Like      | 0.01   | 1.35   | 2.63   | 0.62   | 7.90 | 8.19E-06 | 0.62  | 7.94E-01 | -3.23 | 2.09E-01 | EGA2-1 |
| ENSMMUG00000017375 | CMPK1     | Cytidine/uridine Monophosphate Kinase 1       | 4.07   | 12.81  | 11.47  | 10.99  | 1.86 | 1.87E-02 | -0.26 | 8.15E-01 | 0.16  | 9.52E-01 | EGA2-1 |
| ENSMMUG00000040728 | LOC711309 | Cytochrome C-like                             | 40.83  | 130.57 | 186.93 | 127.64 | 1.39 | 2.44E-02 | 0.79  | 2.40E-01 | -0.31 | 8.36E-01 | EGA2-1 |
| ENSMMUG00000012112 | RNF11     | Ring Finger Protein 11                        | 6.11   | 41.16  | 27.24  | 5.73   | 2.52 | 4.35E-04 | -0.34 | 7.33E-01 | -1.79 | 7.08E-02 | EGA2-1 |
| ENSMMUG00000004738 | NRDC      | Nardilysin Convertase                         | 3.47   | 12.59  | 14.18  | 20.76  | 1.53 | 8.60E-03 | 0.54  | 4.28E-01 | 0.53  | 6.57E-01 | EGA2-1 |
| ENSMMUG00000043685 |           |                                               | 0.43   | 9.01   | 3.41   | 3.12   | 6.12 | 2.11E-04 | -1.81 | 3.31E-01 | 1.52  | 6.52E-01 | EGA2-1 |
| ENSMMUG00000014503 |           |                                               | 0.89   | 16.63  | 18.65  | 4.40   | 4.69 | 2.32E-09 | -0.38 | 7.37E-01 | -1.63 | 1.97E-01 | EGA2-1 |
| ENSMMUG00000031232 |           |                                               | 2.10   | 10.85  | 22.89  | 14.09  | 2.21 | 7.51E-04 | 0.75  | 3.33E-01 | -0.16 | 9.45E-01 | EGA2-1 |
| ENSMMUG00000006485 | L1TD1     | LINE1 Type Transposase Domain Containing 1    | 1.15   | 531.32 | 704.05 | 293.08 | 8.49 | 6.99E-32 | 0.91  | 3.35E-01 | -1.42 | 2.56E-01 | EGA2-1 |
| ENSMMUG00000002340 | DOCK7     | Dedicator Of Cytokinesis 7                    | 1.20   | 5.69   | 7.42   | 10.51  | 2.09 | 4.84E-03 | 0.50  | 5.90E-01 | 0.41  | 8.22E-01 | EGA2-1 |
| ENSMMUG00000000641 | WDR78     | WD Repeat Domain 78                           | 0.12   | 1.11   | 0.35   | 0.34   | 3.40 | 4.41E-02 | -2.48 | 1.60E-01 | 2.85  | 2.68E-01 | EGA2-1 |
| ENSMMUG00000000652 | SERBP1    | SERPINE1 MRNA Binding Protein 1               | 63.97  | 218.47 | 260.40 | 221.48 | 1.59 | 3.16E-04 | 0.46  | 3.91E-01 | -0.07 | 9.66E-01 | EGA2-1 |
| ENSMMUG00000044712 |           |                                               | 0.45   | 2.46   | 5.34   | 6.68   | 2.80 | 1.81E-05 | 0.98  | 1.93E-01 | 1.19  | 2.62E-01 | EGA2-1 |
| ENSMMUG00000013853 | ANKRD13C  | Ankyrin Repeat Domain 13C                     | 2.04   | 8.06   | 12.12  | 5.10   | 2.78 | 1.27E-03 | -0.65 | 5.50E-01 | -0.38 | 8.73E-01 | EGA2-1 |
| ENSMMUG00000019326 | CTH       | Cystathionine Gamma-lyase                     | 0.14   | 1.11   | 3.01   | 2.34   | 4.65 | 9.28E-04 | 1.21  | 4.75E-01 | 0.87  | 7.99E-01 | EGA2-1 |
| ENSMMUG00000008682 |           |                                               | 1.07   | 6.55   | 4.58   | 3.68   | 2.28 | 2.25E-02 | -0.31 | 8.26E-01 | -0.40 | 8.83E-01 | EGA2-1 |
| ENSMMUG00000000873 | RABGGB    | Rab Geranylgeranyltransferase Beta Subunit    | 3.93   | 20.51  | 24.72  | 22.69  | 2.35 | 5.49E-03 | 0.39  | 7.34E-01 | -0.08 | 9.80E-01 | EGA2-1 |
| ENSMMUG00000010352 | NEXN      | Nexilin F-actin Binding Protein               | 0.10   | 1.43   | 2.03   | 1.45   | 5.86 | 2.03E-05 | 1.02  | 5.37E-01 | -1.60 | 5.15E-01 | EGA2-1 |
| ENSMMUG00000002899 | FUBP1     | Far Upstream Element Binding Protein 1        | 9.93   | 19.70  | 25.80  | 20.15  | 1.12 | 1.31E-03 | 0.30  | 4.80E-01 | 0.07  | 9.58E-01 | EGA2-1 |
| ENSMMUG00000002516 | ADGRL2    | Adhesion G Protein-coupled Receptor L2        | 0.78   | 4.09   | 3.62   | 4.59   | 3.37 | 1.66E-03 | -0.97 | 4.57E-01 | 0.08  | 9.85E-01 | EGA2-1 |
| ENSMMUG00000041521 |           |                                               | 0.56   | 4.10   | 1.29   | 0.72   | 3.08 | 9.96E-03 | -1.42 | 2.93E-01 | -1.24 | 5.99E-01 | EGA2-1 |
| ENSMMUG00000032587 |           |                                               | 1.95   | 6.25   | 3.12   | 3.75   | 2.00 | 3.61E-02 | -0.93 | 3.89E-01 | -0.64 | 7.67E-01 | EGA2-1 |
| ENSMMUG00000037887 | RBMXL1    | RNA Binding Motif Protein, X-linked Like 1    | 0.69   | 5.09   | 6.00   | 6.23   | 2.64 | 1.58E-04 | 1.02  | 2.02E-01 | -0.81 | 5.49E-01 | EGA2-1 |
| ENSMMUG00000003442 | ZNF326    | Zinc Finger Protein 326                       | 2.48   | 15.14  | 23.19  | 31.30  | 2.35 | 7.15E-03 | 1.09  | 2.65E-01 | 0.13  | 9.68E-01 | EGA2-1 |
| ENSMMUG00000007635 | ZNF644    | Zinc Finger Protein 644                       | 1.03   | 4.75   | 12.73  | 17.31  | 2.22 | 3.22E-03 | 1.27  | 1.16E-01 | 1.43  | 2.04E-01 | EGA2-1 |
| ENSMMUG00000005072 | RPL5      | Ribosomal Protein L5                          | 155.20 | 363.63 | 482.60 | 491.88 | 1.31 | 1.21E-04 | 0.49  | 2.13E-01 | -0.14 | 8.92E-01 | EGA2-1 |

|                     |              |                                                            |       |        |        |        |       |          |       |          |       |          |        |
|---------------------|--------------|------------------------------------------------------------|-------|--------|--------|--------|-------|----------|-------|----------|-------|----------|--------|
| ENSMMUG00000040115  |              |                                                            | 0.02  | 0.45   | 0.95   | 0.60   | 4.90  | 2.15E-02 | 0.51  | 8.57E-01 | -1.53 | 7.30E-01 | EGA2-1 |
| ENSMMUG00000008435  | DNTTIP2      | Deoxynucleotidyltransferase Terminal Interacting Protein 2 | 11.55 | 48.26  | 37.70  | 21.28  | 1.56  | 2.68E-02 | -0.24 | 8.05E-01 | -0.42 | 8.00E-01 | EGA2-1 |
| ENSMMUG00000003727  | EXTL2        | Exostosin Like Glycosyltransferase 2                       | 0.46  | 2.64   | 3.16   | 4.44   | 2.63  | 3.25E-03 | 0.48  | 6.88E-01 | 1.16  | 4.63E-01 | EGA2-1 |
| ENSMMUG00000003730  | DPH5         | Diphthamide Biosynthesis 5                                 | 0.21  | 4.72   | 4.72   | 3.00   | 5.84  | 1.06E-05 | 0.37  | 8.52E-01 | -1.35 | 6.17E-01 | EGA2-1 |
| ENSMMUG00000017647  |              |                                                            | 0.17  | 2.26   | 2.54   | 2.48   | 4.05  | 2.66E-07 | 0.12  | 9.24E-01 | -0.14 | 9.63E-01 | EGA2-1 |
| ENSMMUG00000008197  | NTNG1        | Netrin G1                                                  | 0.00  | 1.33   | 0.86   | 0.31   | 8.84  | 1.44E-12 | -1.84 | 1.57E-01 | -1.90 | 3.26E-01 | EGA2-1 |
| ENSMMUG00000010155  | PRPF38B      | Pre-mRNA Processing Factor 38B                             | 9.72  | 34.47  | 31.91  | 30.22  | 1.89  | 5.12E-05 | -0.09 | 9.00E-01 | 0.15  | 9.20E-01 | EGA2-1 |
| ENSMMUG00000021837  | SARS         | Seryl-tRNA Synthetase                                      | 13.77 | 46.73  | 53.77  | 19.19  | 1.85  | 9.74E-03 | -0.33 | 7.30E-01 | -0.95 | 4.40E-01 | EGA2-1 |
| ENSMMUG00000022715  | AHCYL1       | Adenosylhomocysteinase Like 1                              | 0.79  | 5.96   | 7.85   | 17.62  | 3.05  | 1.48E-05 | 0.39  | 6.97E-01 | 1.02  | 4.22E-01 | EGA2-1 |
| ENSMMUG00000015022  | SLC16A4      | Solute Carrier Family 16 Member 4                          | 0.05  | 1.29   | 1.95   | 1.03   | 5.05  | 2.07E-05 | 0.22  | 9.05E-01 | -1.20 | 6.22E-01 | EGA2-1 |
| ENSMMUG00000000812  | LRIF1        | Ligand Dependent Nuclear Receptor Interacting Factor 1     | 1.14  | 6.99   | 15.16  | 8.87   | 2.36  | 3.41E-03 | 0.93  | 3.19E-01 | -0.72 | 6.71E-01 | EGA2-1 |
| ENSMMUG00000006171  | SLC16A1      | Solute Carrier Family 16 Member 1                          | 19.95 | 229.34 | 109.17 | 44.81  | 3.69  | 2.37E-10 | -1.27 | 5.43E-02 | -0.45 | 7.54E-01 | EGA2-1 |
| ENSMMUG00000017823  | RSBN1        | Round Spermatid Basic Protein 1                            | 0.79  | 4.67   | 7.17   | 6.00   | 2.51  | 4.58E-03 | 0.10  | 9.46E-01 | -0.03 | 9.94E-01 | EGA2-1 |
| ENSMMUG00000014497  |              |                                                            | 0.37  | 4.86   | 3.69   | 2.05   | 3.02  | 1.03E-02 | 1.31  | 3.24E-01 | -2.45 | 1.40E-01 | EGA2-1 |
| ENSMMUG000000049105 | NRAS         | NRAS Proto-oncogene, GTPase                                | 4.50  | 12.82  | 14.14  | 15.60  | 1.99  | 8.62E-05 | -0.48 | 4.47E-01 | 1.20  | 9.89E-02 | EGA2-1 |
| ENSMMUG000000041725 | LOC710287    | 60S Ribosomal Protein L6 like                              | 20.51 | 92.90  | 158.27 | 148.61 | 2.09  | 2.35E-07 | 0.86  | 5.55E-02 | 0.05  | 9.74E-01 | EGA2-1 |
| ENSMMUG00000008513  | WDR3         | WD Repeat Domain 3                                         | 0.48  | 22.38  | 26.87  | 21.75  | 5.46  | 4.24E-14 | 0.42  | 6.94E-01 | 0.34  | 8.75E-01 | EGA2-1 |
| ENSMMUG000000044046 | LOC708967    | Myomegalin                                                 | 1.12  | 4.58   | 2.55   | 3.11   | 1.89  | 1.78E-02 | -0.73 | 4.33E-01 | 1.13  | 3.87E-01 | EGA2-1 |
| ENSMMUG00000012221  | PRKAB2       | Protein Kinase AMP-activated Non-catalytic Subunit Beta 2  | 1.42  | 10.42  | 7.56   | 8.14   | 2.45  | 6.61E-03 | -0.36 | 7.76E-01 | -0.05 | 9.88E-01 | EGA2-1 |
| ENSMMUG000000039668 |              |                                                            | 0.34  | 3.02   | 1.44   | 4.00   | 4.14  | 4.35E-03 | -1.33 | 4.01E-01 | 1.40  | 5.89E-01 | EGA2-1 |
| ENSMMUG00000013734  |              |                                                            | 0.12  | 0.84   | 0.48   | 0.90   | 3.12  | 3.50E-03 | -0.95 | 4.62E-01 | 0.44  | 8.84E-01 | EGA2-1 |
| ENSMMUG00000016051  | RBM8A        | RNA Binding Motif Protein 8A                               | 5.07  | 182.07 | 91.11  | 56.51  | 5.26  | 1.07E-10 | -0.63 | 5.69E-01 | -0.34 | 8.93E-01 | EGA2-1 |
| ENSMMUG000000048007 |              |                                                            | 0.00  | 6.97   | 6.04   | 1.07   | 27.86 | 4.94E-25 | -2.50 | 4.78E-01 | 3.02  | 6.12E-01 | EGA2-1 |
| ENSMMUG000000043098 | LOC695573    | Histone H3-like                                            | 2.10  | 35.24  | 33.93  | 73.11  | 4.18  | 4.93E-04 | -1.35 | 3.42E-01 | 1.01  | 7.02E-01 | EGA2-1 |
| ENSMMUG000000047399 | LOC106996634 | Histone H4-like                                            | 0.88  | 44.77  | 87.09  | 102.62 | 7.59  | 5.41E-08 | -0.31 | 8.78E-01 | -0.53 | 8.93E-01 | EGA2-1 |
| ENSMMUG000000042180 | LOC696463    | Histone H2A Type 2-A                                       | 14.32 | 126.96 | 172.55 | 118.55 | 3.28  | 2.30E-06 | -0.29 | 7.78E-01 | -0.66 | 6.66E-01 | EGA2-1 |
| ENSMMUG000000043700 | LOC714818    | Histone H2B Type 2-E                                       | 24.57 | 93.48  | 67.52  | 71.77  | 2.05  | 3.75E-03 | -0.68 | 4.16E-01 | -0.54 | 7.32E-01 | EGA2-1 |
| ENSMMUG000000037540 | HIST2H2AC    | Histone Cluster 2, H2ac                                    | 9.77  | 76.94  | 182.02 | 100.19 | 3.08  | 3.21E-05 | 0.59  | 5.38E-01 | -0.51 | 7.79E-01 | EGA2-1 |
| ENSMMUG000000038618 | HIST2H2AB    | Histone Cluster 2, H2ab                                    | 0.88  | 51.44  | 31.35  | 30.60  | 5.73  | 1.06E-05 | 0.20  | 9.26E-01 | -0.70 | 8.39E-01 | EGA2-1 |
| ENSMMUG00000006257  | ECM1         | Extracellular Matrix Protein 1                             | 0.01  | 2.62   | 1.67   | 6.85   | 9.62  | 3.84E-07 | 1.31  | 5.71E-01 | -0.74 | 8.87E-01 | EGA2-1 |
| ENSMMUG00000008221  | MCL1         | MCL1, BCL2 Family Apoptosis Regulator                      | 1.08  | 8.56   | 7.27   | 7.81   | 4.93  | 2.49E-05 | -1.20 | 4.05E-01 | 1.14  | 6.48E-01 | EGA2-1 |
| ENSMMUG00000010669  | HORMAD1      | HORMA Domain Containing 1                                  | 0.00  | 1.23   | 2.98   | 3.46   | 8.44  | 3.81E-08 | 1.35  | 4.27E-01 | -0.80 | 8.27E-01 | EGA2-1 |
| ENSMMUG000000031718 | LOC716056    | Cytochrome C-like                                          | 8.16  | 32.25  | 46.26  | 28.86  | 1.71  | 9.39E-03 | 0.70  | 3.55E-01 | -0.37 | 8.15E-01 | EGA2-1 |
| ENSMMUG000000045007 |              |                                                            | 0.84  | 3.70   | 5.32   | 3.60   | 2.48  | 7.78E-03 | 0.94  | 3.82E-01 | -0.92 | 6.15E-01 | EGA2-1 |
| ENSMMUG000000020924 | PSMB4        | Proteasome Subunit Beta 4                                  | 16.13 | 45.06  | 67.30  | 99.39  | 1.83  | 3.67E-02 | 0.49  | 6.50E-01 | 0.37  | 8.71E-01 | EGA2-1 |
| ENSMMUG00000014361  | THEM4        | Thioesterase Superfamily Member 4                          | 0.27  | 34.28  | 94.53  | 77.17  | 6.50  | 7.11E-15 | 1.72  | 7.00E-02 | -0.23 | 9.37E-01 | EGA2-1 |
| ENSMMUG00000008146  | CHTOP        | Chromatin Target Of PRMT1                                  | 7.92  | 25.33  | 14.84  | 12.24  | 1.74  | 3.59E-03 | -0.71 | 3.00E-01 | -0.20 | 9.09E-01 | EGA2-1 |
| ENSMMUG00000010805  | TPM3         | Tropomyosin 3                                              | 42.05 | 117.96 | 143.86 | 120.16 | 1.38  | 6.53E-06 | 0.10  | 8.36E-01 | 0.07  | 9.54E-01 | EGA2-1 |
| ENSMMUG00000022978  |              |                                                            | 0.01  | 4.37   | 18.50  | 3.87   | 7.75  | 1.05E-05 | -1.03 | 6.19E-01 | 3.54  | 1.34E-01 | EGA2-1 |
| ENSMMUG00000023350  | EFNA3        | Ephrin A3                                                  | 0.11  | 0.70   | 0.71   | 0.78   | 7.43  | 7.64E-05 | -3.03 | 1.37E-01 | -0.60 | 9.12E-01 | EGA2-1 |
| ENSMMUG000000048503 | KRTCAP2      | Keratinocyte Associated Protein 2                          | 1.41  | 4.82   | 6.83   | 5.55   | 2.21  | 4.28E-02 | -0.64 | 6.36E-01 | 1.17  | 5.51E-01 | EGA2-1 |

|                    |           |                                                                                            |       |       |        |        |      |          |       |          |       |          |        |
|--------------------|-----------|--------------------------------------------------------------------------------------------|-------|-------|--------|--------|------|----------|-------|----------|-------|----------|--------|
| ENSMMUG00000023146 | ASH1L     | ASH1 Like Histone Lysine Methyltransferase                                                 | 4.25  | 11.43 | 10.81  | 8.33   | 1.24 | 7.85E-03 | 0.00  | 9.96E-01 | -0.64 | 4.22E-01 | EGA2-1 |
| ENSMMUG00000000085 | PAQR6     | Progesterone And AdipoQ Receptor Family Member 6                                           | 0.02  | 2.49  | 3.09   | 2.35   | 6.98 | 6.70E-08 | -0.97 | 5.54E-01 | 0.53  | 8.87E-01 | EGA2-1 |
| ENSMMUG00000002624 | GPATCH4   | G-patch Domain Containing 4                                                                | 4.27  | 31.29 | 47.16  | 22.67  | 2.83 | 8.57E-06 | 0.65  | 4.11E-01 | -1.01 | 3.54E-01 | EGA2-1 |
| ENSMMUG00000000037 | ISG20L2   | Interferon Stimulated Exonuclease Gene 20 Like 2                                           | 0.88  | 16.55 | 17.81  | 11.45  | 3.96 | 1.92E-06 | 0.52  | 6.46E-01 | -0.13 | 9.68E-01 | EGA2-1 |
| ENSMMUG00000042886 | ETV3      | ETS Variant 3                                                                              | 2.16  | 13.66 | 10.76  | 16.07  | 2.48 | 1.55E-04 | -0.20 | 8.38E-01 | 0.15  | 9.49E-01 | EGA2-1 |
| ENSMMUG00000047089 | PIGM      | Phosphatidylinositol Glycan Anchor Biosynthesis Class M                                    | 1.26  | 3.89  | 1.51   | 0.98   | 2.26 | 1.96E-02 | -1.64 | 1.03E-01 | -0.08 | 9.82E-01 | EGA2-1 |
| ENSMMUG00000017838 | PEA15     | Proliferation And Apoptosis Adaptor Protein 15                                             | 0.99  | 9.70  | 9.24   | 12.74  | 2.80 | 2.69E-02 | -0.03 | 9.89E-01 | 2.73  | 1.06E-01 | EGA2-1 |
| ENSMMUG00000022632 | UFC1      | Ubiquitin-fold Modifier Conjugating Enzyme 1                                               | 8.62  | 41.19 | 26.49  | 24.17  | 1.89 | 7.14E-03 | -0.75 | 3.57E-01 | 0.52  | 7.41E-01 | EGA2-1 |
| ENSMMUG00000003775 | FCGR2A    | Fc Fragment Of IgG Receptor IIa                                                            | 0.07  | 1.07  | 3.47   | 4.84   | 4.87 | 1.91E-04 | 1.50  | 3.06E-01 | 0.78  | 8.03E-01 | EGA2-1 |
| ENSMMUG00000042149 | LOC694687 | 40S Ribosomal Protein S10 Pseudogene                                                       | 11.70 | 60.89 | 98.11  | 54.91  | 2.52 | 1.10E-07 | 0.38  | 5.46E-01 | -0.40 | 7.23E-01 | EGA2-1 |
| ENSMMUG00000016014 | LIN9      | Lin-9 DREAM MuvB Core Complex Component                                                    | 2.01  | 6.18  | 6.19   | 6.84   | 2.17 | 2.35E-02 | -0.28 | 8.38E-01 | 0.77  | 6.96E-01 | EGA2-1 |
| ENSMMUG00000022510 | NVL       | Nuclear VCP-like                                                                           | 2.00  | 7.90  | 11.19  | 6.26   | 2.04 | 1.11E-02 | 0.55  | 5.76E-01 | -0.89 | 5.53E-01 | EGA2-1 |
| ENSMMUG00000000676 | FBXO28    | F-box Protein 28                                                                           | 0.52  | 1.63  | 3.32   | 6.57   | 2.08 | 1.57E-02 | 1.09  | 2.50E-01 | 1.65  | 1.82E-01 | EGA2-1 |
| ENSMMUG00000011146 | TP53BP2   | Tumor Protein P53 Binding Protein 2                                                        | 5.39  | 21.54 | 30.38  | 18.47  | 2.02 | 8.61E-04 | 0.04  | 9.68E-01 | -0.08 | 9.72E-01 | EGA2-1 |
| ENSMMUG00000041825 |           |                                                                                            | 3.83  | 34.61 | 55.81  | 32.67  | 3.08 | 1.18E-04 | 0.66  | 5.16E-01 | -0.49 | 8.06E-01 | EGA2-1 |
| ENSMMUG00000015026 | BROX      | BRO1 Domain And CAAX Motif Containing                                                      | 4.20  | 15.42 | 17.17  | 14.19  | 2.05 | 3.22E-03 | -0.08 | 9.42E-01 | 0.16  | 9.46E-01 | EGA2-1 |
| ENSMMUG00000031593 |           |                                                                                            | 1.67  | 9.43  | 11.96  | 12.22  | 2.47 | 9.54E-03 | 0.04  | 9.78E-01 | 0.51  | 8.27E-01 | EGA2-1 |
| ENSMMUG00000004070 | RRP15     | Ribosomal RNA Processing 15 Homolog                                                        | 8.72  | 45.60 | 47.74  | 26.46  | 2.20 | 1.35E-06 | 0.25  | 7.01E-01 | -0.29 | 8.03E-01 | EGA2-1 |
| ENSMMUG00000015634 | CENPF     | Centromere Protein F                                                                       | 30.95 | 75.53 | 73.61  | 45.33  | 1.30 | 1.68E-02 | 0.15  | 8.45E-01 | -0.64 | 5.11E-01 | EGA2-1 |
| ENSMMUG00000022066 | DIEXF     | Digestive Organ Expansion Factor Homolog (zebrafish)                                       | 0.26  | 10.35 | 7.03   | 3.78   | 5.04 | 1.03E-10 | -0.61 | 5.66E-01 | -0.03 | 9.94E-01 | EGA2-1 |
| ENSMMUG00000007129 | CD46      | CD46 Molecule                                                                              | 0.60  | 4.09  | 4.62   | 13.25  | 3.42 | 1.29E-04 | 0.27  | 8.38E-01 | 0.93  | 6.08E-01 | EGA2-1 |
| ENSMMUG00000022171 | YOD1      | YOD1 Deubiquitinase                                                                        | 0.08  | 4.18  | 2.77   | 2.41   | 5.51 | 3.22E-05 | -1.59 | 2.97E-01 | 1.21  | 6.70E-01 | EGA2-1 |
| ENSMMUG00000040003 |           |                                                                                            | 1.36  | 5.36  | 13.32  | 9.57   | 2.17 | 2.13E-03 | 1.23  | 9.97E-02 | -0.50 | 7.60E-01 | EGA2-1 |
| ENSMMUG00000011746 |           |                                                                                            | 22.65 | 83.67 | 126.52 | 107.26 | 1.84 | 4.89E-05 | 0.62  | 2.43E-01 | -0.36 | 7.37E-01 | EGA2-1 |
| ENSMMUG00000018802 | TMEM81    | Transmembrane Protein 81                                                                   | 0.06  | 3.15  | 0.56   | 0.41   | 7.20 | 5.18E-04 | -3.29 | 1.21E-01 | 1.01  | 8.44E-01 | EGA2-1 |
| ENSMMUG00000008460 | SOX13     | SRY-box 13                                                                                 | 0.03  | 6.50  | 8.15   | 5.46   | 7.80 | 6.92E-16 | -0.62 | 6.43E-01 | 0.47  | 8.63E-01 | EGA2-1 |
| ENSMMUG00000010539 | ZC3H11A   | Zinc Finger CCCH-type Containing 11A                                                       | 8.09  | 20.78 | 24.95  | 28.75  | 1.31 | 9.78E-04 | 0.50  | 2.72E-01 | 0.13  | 9.10E-01 | EGA2-1 |
| ENSMMUG00000040155 | LOC704267 | 40S Ribosomal Protein S27-like                                                             | 18.99 | 98.42 | 156.39 | 153.18 | 2.42 | 3.82E-08 | 0.53  | 3.35E-01 | 0.29  | 8.01E-01 | EGA2-1 |
| ENSMMUG00000015234 | LOC705299 | Alpha-1,3-mannosyl-glycoprotein 4-beta-N-acetylglucosaminyltransferase-like Protein MGAT4E | 0.01  | 1.70  | 0.27   | 0.08   | 7.24 | 2.91E-03 | -2.64 | 3.37E-01 | -2.42 | 6.15E-01 | EGA2-1 |
| ENSMMUG00000015233 | KDM5B     | Lysine Demethylase 5B                                                                      | 1.78  | 67.05 | 49.80  | 35.97  | 4.79 | 2.55E-18 | -0.15 | 8.64E-01 | -0.38 | 8.00E-01 | EGA2-1 |
| ENSMMUG00000001924 | TIMM17A   | Translocase Of Inner Mitochondrial Membrane 17A                                            | 7.11  | 40.95 | 41.00  | 37.10  | 3.07 | 1.46E-03 | -0.37 | 7.87E-01 | 0.03  | 9.93E-01 | EGA2-1 |
| ENSMMUG00000012218 | CAMSAP2   | Calmodulin Regulated Spectrin Associated Protein Family Member 2                           | 1.75  | 7.36  | 15.29  | 7.85   | 1.81 | 4.85E-02 | 0.59  | 5.89E-01 | 0.24  | 9.32E-01 | EGA2-1 |

|                     |              |                                                           |        |        |        |        |      |          |       |          |       |          |        |
|---------------------|--------------|-----------------------------------------------------------|--------|--------|--------|--------|------|----------|-------|----------|-------|----------|--------|
| ENSMMUG00000016188  | NR5A2        | Nuclear Receptor Subfamily 5 Group A Member 2             | 2.62   | 7.18   | 10.21  | 5.75   | 2.76 | 9.39E-04 | -0.10 | 9.41E-01 | 0.13  | 9.68E-01 | EGA2-1 |
| ENSMMUG00000022647  | CDC73        | Cell Division Cycle 73                                    | 23.71  | 60.64  | 54.20  | 43.91  | 1.44 | 1.84E-02 | -0.13 | 8.86E-01 | -0.34 | 8.13E-01 | EGA2-1 |
| ENSMMUG00000022648  | B3GALT2      | Beta-1,3-galactosyltransferase 2                          | 0.10   | 1.55   | 4.13   | 1.52   | 6.79 | 7.25E-08 | 1.29  | 3.63E-01 | -2.38 | 1.90E-01 | EGA2-1 |
| ENSMMUG00000005410  | EDEM3        | ER Degradation Enhancing Alpha-mannosidase Like Protein 3 | 0.25   | 2.72   | 4.87   | 11.15  | 4.32 | 2.15E-06 | 0.65  | 5.92E-01 | 1.77  | 2.19E-01 | EGA2-1 |
| ENSMMUG00000001481  | NMNAT2       | Nicotinamide Nucleotide Adenylyltransferase 2             | 0.19   | 7.52   | 1.61   | 4.43   | 4.83 | 1.09E-04 | -1.56 | 2.86E-01 | 1.43  | 5.58E-01 | EGA2-1 |
| ENSMMUG00000005635  | DHX9         | DExH-box Helicase 9                                       | 3.06   | 69.89  | 59.22  | 43.84  | 4.40 | 2.44E-24 | 0.02  | 9.75E-01 | -0.48 | 6.22E-01 | EGA2-1 |
| ENSMMUG00000022883  |              |                                                           | 2.35   | 10.59  | 13.24  | 2.47   | 2.51 | 4.78E-03 | -1.21 | 2.27E-01 | -1.17 | 4.73E-01 | EGA2-1 |
| ENSMMUG00000016234  | RNASEH2C     | Ribonuclease H2 Subunit C                                 | 1.28   | 18.12  | 16.58  | 9.95   | 5.27 | 9.65E-06 | -0.82 | 6.04E-01 | 0.02  | 9.98E-01 | EGA2-1 |
| ENSMMUG00000002135  | CEP350       | Centrosomal Protein 350                                   | 4.15   | 11.72  | 11.54  | 12.54  | 1.29 | 2.13E-02 | 0.35  | 6.10E-01 | 0.16  | 9.19E-01 | EGA2-1 |
| ENSMMUG00000014873  |              |                                                           | 1.40   | 12.84  | 6.52   | 7.71   | 2.38 | 2.98E-02 | -0.49 | 7.32E-01 | 1.85  | 2.55E-01 | EGA2-1 |
| ENSMMUG00000037734  | TOR1AIP2     | Torsin 1A Interacting Protein 2                           | 6.26   | 29.30  | 55.14  | 19.88  | 2.07 | 3.51E-02 | 0.98  | 3.72E-01 | -0.96 | 6.02E-01 | EGA2-1 |
| ENSMMUG00000031279  | TOR1AIP2     | Torsin A Interacting Protein 2                            | 0.53   | 6.37   | 6.91   | 6.16   | 3.36 | 4.78E-04 | 0.48  | 7.21E-01 | 0.88  | 6.66E-01 | EGA2-1 |
| ENSMMUG00000001571  | CACYBP       | Calcyclin Binding Protein                                 | 15.96  | 54.12  | 55.73  | 62.91  | 1.55 | 3.40E-05 | 0.12  | 8.26E-01 | 0.20  | 8.44E-01 | EGA2-1 |
| ENSMMUG00000007266  | METTL13      | Methyltransferase Like 13                                 | 0.57   | 9.42   | 6.12   | 2.96   | 3.41 | 2.06E-04 | -0.51 | 6.82E-01 | -1.19 | 4.82E-01 | EGA2-1 |
| ENSMMUG00000023202  |              |                                                           | 1.31   | 6.85   | 9.46   | 11.69  | 2.16 | 3.35E-05 | 0.71  | 2.46E-01 | -0.30 | 8.25E-01 | EGA2-1 |
| ENSMMUG00000013639  | PRRC2C       | Proline Rich Coiled-coil 2C                               | 102.24 | 181.53 | 182.96 | 147.75 | 0.83 | 6.76E-03 | 0.23  | 5.50E-01 | -0.45 | 3.76E-01 | EGA2-1 |
| ENSMMUG00000009184  | MPZL1        | Myelin Protein Zero Like 1                                | 7.08   | 23.09  | 28.42  | 25.70  | 1.44 | 4.15E-02 | 0.93  | 2.15E-01 | -0.63 | 6.48E-01 | EGA2-1 |
| ENSMMUG000000040586 |              |                                                           | 1.09   | 4.66   | 6.77   | 6.63   | 1.92 | 4.30E-04 | 0.76  | 2.23E-01 | -0.69 | 4.96E-01 | EGA2-1 |
| ENSMMUG00000005721  |              |                                                           | 0.03   | 1.19   | 1.34   | 2.81   | 6.20 | 1.15E-06 | -0.46 | 7.87E-01 | 1.93  | 3.38E-01 | EGA2-1 |
| ENSMMUG000000041811 |              |                                                           | 44.86  | 105.38 | 138.17 | 55.51  | 1.23 | 3.81E-02 | -0.07 | 9.34E-01 | -0.88 | 3.40E-01 | EGA2-1 |
| ENSMMUG00000009509  | URB2         | URB2 Ribosome Biogenesis 2 Homolog (S. Cerevisiae)        | 0.38   | 3.27   | 6.09   | 3.57   | 4.15 | 6.13E-07 | 0.70  | 5.23E-01 | -0.96 | 5.67E-01 | EGA2-1 |
| ENSMMUG00000005243  | EXOC8        | Exocyst Complex Component 8                               | 0.23   | 3.12   | 1.96   | 2.79   | 4.70 | 5.87E-06 | -0.93 | 4.79E-01 | -0.43 | 8.87E-01 | EGA2-1 |
| ENSMMUG00000009226  | MAP3K21      | Mitogen-activated Protein Kinase Kinase Kinase 21         | 0.05   | 8.87   | 4.66   | 0.41   | 7.52 | 4.70E-10 | -1.31 | 3.86E-01 | -3.33 | 5.13E-02 | EGA2-1 |
| ENSMMUG000000021702 | LOC718775    | Uncharacterized LOC718775                                 | 4.77   | 34.07  | 39.66  | 25.15  | 2.23 | 1.48E-03 | 0.77  | 3.51E-01 | -0.79 | 5.58E-01 | EGA2-1 |
| ENSMMUG000000021703 | TARBP1       | TAR (HIV-1) RNA Binding Protein 1                         | 0.22   | 1.02   | 3.04   | 5.13   | 2.18 | 2.15E-02 | 1.54  | 1.17E-01 | 1.54  | 2.81E-01 | EGA2-1 |
| ENSMMUG000000021239 |              |                                                           | 0.44   | 2.06   | 3.00   | 2.32   | 3.24 | 6.00E-03 | -0.36 | 8.27E-01 | 0.40  | 9.04E-01 | EGA2-1 |
| ENSMMUG000000031161 | CHML         | CHM Like, Rab Escort Protein 2                            | 0.27   | 1.22   | 2.28   | 2.55   | 2.48 | 3.62E-02 | 1.23  | 3.47E-01 | 0.38  | 9.09E-01 | EGA2-1 |
| ENSMMUG000000000016 | ADSS         | Adenylosuccinate Synthase                                 | 1.05   | 3.65   | 8.83   | 11.08  | 2.36 | 1.94E-02 | 1.31  | 2.33E-01 | -0.62 | 7.91E-01 | EGA2-1 |
| ENSMMUG000000044267 |              |                                                           | 0.49   | 6.98   | 6.22   | 21.39  | 3.24 | 3.32E-02 | 0.05  | 9.85E-01 | 2.30  | 3.24E-01 | EGA2-1 |
| ENSMMUG000000021098 | HNRNPU       | Heterogeneous Nuclear Ribonucleoprotein U                 | 126.71 | 397.58 | 266.25 | 218.04 | 1.67 | 1.19E-08 | -0.57 | 9.00E-02 | -0.12 | 8.91E-01 | EGA2-1 |
| ENSMMUG000000022915 | TFB2M        | Transcription Factor B2, Mitochondrial                    | 2.11   | 11.80  | 26.73  | 27.54  | 2.17 | 1.51E-02 | 1.04  | 2.97E-01 | 0.87  | 6.16E-01 | EGA2-1 |
| ENSMMUG000000016408 | AHCTF1       | AT-hook Containing Transcription Factor 1                 | 34.63  | 84.31  | 66.66  | 37.90  | 1.16 | 1.89E-02 | -0.20 | 7.66E-01 | -0.69 | 4.01E-01 | EGA2-1 |
| ENSMMUG000000021266 |              |                                                           | 0.71   | 6.22   | 5.24   | 6.39   | 3.27 | 7.84E-06 | -0.63 | 5.04E-01 | 0.78  | 6.07E-01 | EGA2-1 |
| ENSMMUG000000047497 | LOC100425996 | Peptidyl-prolyl Cis-trans Isomerase A Pseudogene          | 25.36  | 162.99 | 259.81 | 284.81 | 2.93 | 3.21E-05 | 0.81  | 3.43E-01 | 0.86  | 5.30E-01 | EGA2-1 |
| ENSMMUG000000020337 | NSUN3        | NOP2/Sun RNA Methyltransferase Family Member 3            | 0.17   | 3.77   | 1.01   | 2.00   | 4.74 | 4.48E-05 | -1.91 | 1.39E-01 | -0.01 | 9.98E-01 | EGA2-1 |
| ENSMMUG000000032088 | LNP1         | Leukemia NUP98 Fusion Partner 1                           | 0.10   | 3.58   | 1.21   | 0.72   | 5.49 | 2.07E-05 | -1.06 | 5.26E-01 | -2.68 | 1.81E-01 | EGA2-1 |

|                     |              |                                                                    |       |        |        |        |       |          |       |          |       |          |        |
|---------------------|--------------|--------------------------------------------------------------------|-------|--------|--------|--------|-------|----------|-------|----------|-------|----------|--------|
| ENSMMUG00000021570  |              |                                                                    | 0.78  | 4.54   | 10.92  | 11.67  | 2.31  | 1.08E-02 | 1.04  | 3.04E-01 | 0.69  | 7.23E-01 | EGA2-1 |
| ENSMMUG00000029695  |              |                                                                    | 6.72  | 22.65  | 27.71  | 20.82  | 1.80  | 3.23E-03 | -0.24 | 7.84E-01 | -0.18 | 9.25E-01 | EGA2-1 |
| ENSMMUG00000015059  | RPL24        | Ribosomal Protein L24                                              | 92.67 | 214.78 | 243.86 | 183.41 | 1.24  | 7.16E-04 | 0.06  | 9.21E-01 | -0.39 | 5.94E-01 | EGA2-1 |
| ENSMMUG00000021568  | NFKBIZ       | NFKB Inhibitor Zeta                                                | 0.83  | 1.38   | 2.15   | 1.59   | 2.56  | 2.39E-02 | 0.00  | 9.99E-01 | -1.81 | 2.92E-01 | EGA2-1 |
| ENSMMUG00000009807  |              |                                                                    | 22.97 | 63.34  | 107.23 | 62.57  | 1.30  | 1.42E-03 | 0.82  | 5.56E-02 | -0.73 | 2.49E-01 | EGA2-1 |
| ENSMMUG00000009107  | ALCAM        | Activated Leukocyte Cell Adhesion Molecule                         | 0.21  | 0.90   | 2.04   | 1.21   | 4.14  | 1.93E-03 | 1.00  | 5.47E-01 | -0.80 | 8.05E-01 | EGA2-1 |
| ENSMMUG00000006486  |              |                                                                    | 8.65  | 24.46  | 37.99  | 16.89  | 1.45  | 3.75E-02 | 0.78  | 3.03E-01 | 0.02  | 9.93E-01 | EGA2-1 |
| ENSMMUG00000038476  |              |                                                                    | 0.28  | 3.80   | 3.82   | 7.01   | 5.82  | 4.00E-04 | -1.32 | 4.85E-01 | 1.84  | 5.26E-01 | EGA2-1 |
| ENSMMUG00000048090  |              |                                                                    | 17.86 | 66.62  | 98.61  | 72.79  | 2.13  | 1.03E-05 | 0.68  | 2.35E-01 | -0.59 | 5.28E-01 | EGA2-1 |
| ENSMMUG00000001953  | QTRT2        | Queuine TRNA-ribosyltransferase Accessory Subunit 2                | 1.51  | 13.47  | 12.71  | 6.03   | 3.66  | 2.58E-05 | -1.01 | 3.41E-01 | -0.49 | 8.32E-01 | EGA2-1 |
| ENSMMUG00000047586  | CCDC58       | Coiled-coil Domain Containing 58                                   | 0.92  | 4.43   | 7.60   | 3.74   | 2.12  | 5.98E-06 | 0.96  | 6.34E-02 | -1.23 | 6.47E-02 | EGA2-1 |
| ENSMMUG00000018662  | RUVBL1       | RuvB Like AAA ATPase 1                                             | 1.92  | 13.93  | 7.04   | 7.07   | 3.04  | 1.75E-04 | -1.29 | 1.58E-01 | 0.50  | 8.09E-01 | EGA2-1 |
| ENSMMUG00000045431  | LOC100423625 | Basic Salivary Proline-rich Protein 1-like                         | 1.33  | 6.13   | 11.93  | 6.56   | 3.43  | 8.64E-06 | 0.79  | 4.07E-01 | -0.87 | 5.76E-01 | EGA2-1 |
| ENSMMUG00000007450  | RAF1         | Raf-1 Proto-oncogene, Serine/threonine Kinase                      | 3.15  | 14.30  | 18.97  | 22.13  | 2.03  | 2.92E-03 | 0.39  | 6.66E-01 | 0.75  | 5.61E-01 | EGA2-1 |
| ENSMMUG00000007195  | TSEN2        | TRNA Splicing Endonuclease Subunit 2                               | 1.04  | 3.96   | 3.31   | 5.74   | 1.85  | 4.19E-02 | -0.78 | 4.54E-01 | 0.83  | 6.33E-01 | EGA2-1 |
| ENSMMUG00000019935  | GHRL         | Ghrelin And Obestatin Prepropeptide                                | 0.00  | 0.14   | 0.77   | 0.47   | 15.07 | 1.31E-03 | 2.30  | 7.16E-01 | 5.69  | 5.07E-01 | EGA2-1 |
| ENSMMUG00000031947  | LOC702847    | 60S Ribosomal Protein L35 Pseudogene                               | 15.02 | 128.45 | 189.11 | 180.36 | 3.23  | 1.93E-10 | 0.41  | 5.48E-01 | -0.38 | 7.66E-01 | EGA2-1 |
| ENSMMUG00000017828  | LOC703880    | Histone-lysine N-methyltransferase SETMAR                          | 1.19  | 11.96  | 4.12   | 2.19   | 4.14  | 1.02E-06 | -1.71 | 6.94E-02 | -0.84 | 6.48E-01 | EGA2-1 |
| ENSMMUG000000041509 |              |                                                                    | 8.32  | 48.28  | 57.22  | 70.76  | 2.41  | 7.72E-04 | 0.31  | 7.57E-01 | 0.24  | 9.10E-01 | EGA2-1 |
| ENSMMUG00000000619  |              |                                                                    | 8.99  | 42.98  | 49.01  | 48.29  | 2.46  | 2.35E-07 | 0.38  | 5.48E-01 | -0.54 | 5.84E-01 | EGA2-1 |
| ENSMMUG00000049226  |              |                                                                    | 0.14  | 4.59   | 1.58   | 2.54   | 4.22  | 3.23E-03 | -1.75 | 2.77E-01 | 1.84  | 4.80E-01 | EGA2-1 |
| ENSMMUG00000031896  | KCTD6        | Potassium Channel Tetramerization Domain Containing 6              | 0.05  | 1.00   | 2.21   | 2.46   | 7.07  | 2.84E-07 | 0.83  | 6.16E-01 | 0.53  | 8.85E-01 | EGA2-1 |
| ENSMMUG00000042676  | TMA7         | Translation Machinery Associated 7 Homolog                         | 13.68 | 88.36  | 86.47  | 108.26 | 2.60  | 5.31E-05 | 0.06  | 9.53E-01 | 0.21  | 9.15E-01 | EGA2-1 |
| ENSMMUG00000004052  | PDE12        | Phosphodiesterase 12                                               | 2.42  | 26.98  | 32.51  | 30.80  | 3.58  | 4.58E-07 | 0.25  | 8.15E-01 | -0.07 | 9.81E-01 | EGA2-1 |
| ENSMMUG00000048331  |              |                                                                    | 88.75 | 315.46 | 350.20 | 284.37 | 1.99  | 7.25E-15 | 0.06  | 8.78E-01 | -0.62 | 1.20E-01 | EGA2-1 |
| ENSMMUG00000044752  |              |                                                                    | 0.44  | 8.53   | 10.64  | 3.02   | 4.09  | 5.18E-04 | 0.28  | 8.73E-01 | -0.75 | 7.97E-01 | EGA2-1 |
| ENSMMUG00000019269  | ACTR8        | ARP8 Actin Related Protein 8 Homolog                               | 8.74  | 19.07  | 12.52  | 14.33  | 1.10  | 8.70E-03 | -0.69 | 1.21E-01 | 0.42  | 6.02E-01 | EGA2-1 |
| ENSMMUG00000012526  | GLT8D1       | Glycosyltransferase 8 Domain Containing 1                          | 1.15  | 5.11   | 4.78   | 11.65  | 2.24  | 4.86E-02 | 0.04  | 9.81E-01 | 0.86  | 7.15E-01 | EGA2-1 |
| ENSMMUG00000003644  | RRP9         | Ribosomal RNA Processing 9, U3 Small Nucleolar RNA Binding Protein | 0.44  | 8.06   | 5.69   | 3.21   | 5.16  | 9.34E-06 | -1.11 | 4.45E-01 | -0.60 | 8.51E-01 | EGA2-1 |
| ENSMMUG00000006996  | RASSF1       | Ras Association Domain Family Member 1                             | 0.49  | 3.11   | 4.40   | 2.30   | 3.21  | 5.05E-03 | 0.18  | 9.15E-01 | -1.31 | 5.33E-01 | EGA2-1 |
| ENSMMUG00000020121  | HYAL1        | Hyaluronoglucosaminidase 1                                         | 0.14  | 6.67   | 4.24   | 2.75   | 5.92  | 2.16E-07 | -0.65 | 6.85E-01 | -1.91 | 3.24E-01 | EGA2-1 |
| ENSMMUG00000010337  | SEMA3F       | Semaphorin 3F                                                      | 0.00  | 0.34   | 1.75   | 0.66   | 10.22 | 1.79E-08 | 2.59  | 1.69E-01 | -3.03 | 2.62E-01 | EGA2-1 |
| ENSMMUG00000004921  | RBM5         | RNA Binding Motif Protein 5                                        | 6.95  | 22.56  | 10.93  | 14.93  | 1.30  | 3.12E-02 | -0.49 | 4.87E-01 | -0.19 | 9.11E-01 | EGA2-1 |
| ENSMMUG00000005660  | QRICH1       | Glutamine Rich 1                                                   | 6.02  | 24.15  | 26.55  | 15.35  | 2.00  | 1.66E-03 | 0.22  | 8.14E-01 | -0.65 | 6.05E-01 | EGA2-1 |
| ENSMMUG00000005652  | DALRD3       | DALR Anticodon Binding Domain Containing 3                         | 1.06  | 3.33   | 6.54   | 8.29   | 2.74  | 3.19E-04 | 0.36  | 7.38E-01 | 0.55  | 7.62E-01 | EGA2-1 |
| ENSMMUG00000014705  | UQCRC1       | Ubiquinol-cytochrome C Reductase Core Protein I                    | 3.22  | 8.50   | 10.66  | 15.41  | 1.73  | 2.06E-02 | 0.38  | 6.92E-01 | 0.06  | 9.84E-01 | EGA2-1 |
| ENSMMUG00000021607  | ZNF589       | Zinc Finger Protein 589                                            | 3.21  | 21.24  | 9.83   | 4.31   | 2.43  | 9.53E-03 | -1.50 | 1.30E-01 | -0.15 | 9.65E-01 | EGA2-1 |
| ENSMMUG00000021117  | SETD2        | SET Domain Containing 2                                            | 5.22  | 22.19  | 21.85  | 17.18  | 1.59  | 8.29E-03 | 0.38  | 6.19E-01 | -0.41 | 7.68E-01 | EGA2-1 |
| ENSMMUG00000040852  |              |                                                                    | 0.12  | 1.74   | 2.27   | 1.42   | 4.58  | 4.05E-04 | 0.22  | 9.02E-01 | -1.05 | 6.95E-01 | EGA2-1 |
| ENSMMUG00000031677  | SS18L2       | SS18 Like 2                                                        | 2.86  | 16.21  | 17.53  | 7.57   | 2.73  | 1.47E-02 | -0.19 | 9.07E-01 | -0.64 | 8.11E-01 | EGA2-1 |
| ENSMMUG00000045853  |              |                                                                    | 8.48  | 26.89  | 44.09  | 35.29  | 1.60  | 2.59E-05 | 0.70  | 1.00E-01 | -0.38 | 6.31E-01 | EGA2-1 |

|                     |           |                                                                       |       |        |        |        |      |          |       |          |       |          |        |
|---------------------|-----------|-----------------------------------------------------------------------|-------|--------|--------|--------|------|----------|-------|----------|-------|----------|--------|
| ENSMMUG00000020147  | CSRP1     | Cysteine And Serine Rich Nuclear Protein 1                            | 0.21  | 0.39   | 1.75   | 1.05   | 4.48 | 1.26E-02 | 0.58  | 8.07E-01 | -1.06 | 7.90E-01 | EGA2-1 |
| ENSMMUG00000000995  | MYD88     | Myeloid Differentiation Primary Response 88                           | 0.49  | 2.94   | 9.90   | 4.07   | 3.12 | 2.23E-03 | 0.88  | 4.76E-01 | -0.48 | 8.61E-01 | EGA2-1 |
| ENSMMUG00000001185  | TRA2B     | Transformer 2 Beta Homolog                                            | 3.33  | 28.10  | 23.03  | 21.04  | 3.28 | 8.79E-15 | -0.46 | 4.05E-01 | 0.06  | 9.74E-01 | EGA2-1 |
| ENSMMUG00000023814  | MAP3K13   | Mitogen-activated Protein Kinase Kinase 13                            | 0.42  | 1.34   | 0.46   | 0.63   | 2.66 | 8.38E-03 | -1.94 | 6.31E-02 | 1.20  | 5.12E-01 | EGA2-1 |
| ENSMMUG00000006562  | EIF2B5    | Eukaryotic Translation Initiation Factor 2B Subunit Epsilon           | 1.20  | 8.09   | 3.61   | 3.06   | 3.66 | 2.93E-07 | -1.20 | 1.48E-01 | -0.54 | 7.60E-01 | EGA2-1 |
| ENSMMUG00000010934  | LOC704923 | Eukaryotic Translation Initiation Factor 4 Gamma 1                    | 9.02  | 48.69  | 59.01  | 37.77  | 2.51 | 2.71E-04 | 0.23  | 8.19E-01 | -0.95 | 4.45E-01 | EGA2-1 |
| ENSMMUG00000018955  | LOC702851 | Endothelin-converting Enzyme 2                                        | 0.11  | 2.66   | 4.71   | 0.39   | 5.12 | 6.23E-05 | -0.70 | 6.91E-01 | -1.84 | 4.22E-01 | EGA2-1 |
| ENSMMUG00000008067  |           |                                                                       | 0.40  | 4.55   | 1.65   | 2.18   | 3.44 | 7.74E-03 | -2.32 | 8.70E-02 | 0.73  | 8.15E-01 | EGA2-1 |
| ENSMMUG00000046147  | SOX2      | SRY-box 2                                                             | 0.04  | 8.68   | 17.15  | 3.76   | 7.27 | 1.27E-15 | 1.46  | 1.75E-01 | -2.48 | 5.86E-02 | EGA2-1 |
| ENSMMUG00000011383  |           |                                                                       | 0.36  | 1.97   | 3.00   | 0.89   | 2.46 | 3.84E-02 | -0.56 | 7.16E-01 | -1.18 | 6.00E-01 | EGA2-1 |
| ENSMMUG00000004083  | GNB4      | G Protein Subunit Beta 4                                              | 0.25  | 4.09   | 6.63   | 3.60   | 4.25 | 4.84E-08 | 0.75  | 4.48E-01 | -1.14 | 4.30E-01 | EGA2-1 |
| ENSMMUG00000022880  | EIF5A2    | Eukaryotic Translation Initiation Factor 5A2                          | 0.42  | 4.12   | 2.40   | 1.73   | 2.83 | 2.09E-02 | -1.43 | 2.91E-01 | 0.66  | 8.22E-01 | EGA2-1 |
| ENSMMUG00000011222  | PRKCI     | Protein Kinase C Iota                                                 | 2.30  | 18.37  | 21.21  | 19.76  | 3.25 | 2.22E-08 | 0.12  | 9.02E-01 | 0.02  | 9.93E-01 | EGA2-1 |
| ENSMMUG00000018083  | KPNA4     | Karyopherin Subunit Alpha 4                                           | 0.25  | 2.31   | 7.90   | 9.09   | 4.10 | 5.55E-11 | 1.30  | 6.44E-02 | 0.77  | 5.41E-01 | EGA2-1 |
| ENSMMUG00000017282  | IFT80     | Intraflagellar Transport 80                                           | 0.58  | 2.06   | 1.84   | 1.34   | 2.32 | 7.35E-03 | 0.09  | 9.48E-01 | -0.66 | 7.32E-01 | EGA2-1 |
| ENSMMUG00000023081  | SCHIP1    | Schwannomin Interacting Protein 1                                     | 0.03  | 1.00   | 6.87   | 2.87   | 5.85 | 1.53E-05 | 1.47  | 3.39E-01 | -0.01 | 9.98E-01 | EGA2-1 |
| ENSMMUG00000047267  | WWTR1     | WW Domain Containing Transcription Regulator 1                        | 0.49  | 2.81   | 8.30   | 12.96  | 2.32 | 7.06E-03 | 1.54  | 8.70E-02 | 0.53  | 7.95E-01 | EGA2-1 |
| ENSMMUG00000000294  | LOC710859 | 60S Ribosomal Protein L19 Pseudogene                                  | 47.08 | 155.12 | 226.46 | 185.58 | 1.49 | 2.12E-05 | 0.66  | 8.70E-02 | -0.31 | 6.89E-01 | EGA2-1 |
| ENSMMUG00000017699  | SELENOT   | Selenoprotein T                                                       | 1.96  | 46.15  | 114.01 | 109.37 | 5.11 | 1.81E-09 | 0.79  | 4.74E-01 | 0.91  | 6.16E-01 | EGA2-1 |
| ENSMMUG00000015910  | MBNL1     | Muscleblind Like Splicing Regulator 1                                 | 0.78  | 2.72   | 1.86   | 1.78   | 1.56 | 3.11E-02 | -0.44 | 6.25E-01 | 0.12  | 9.63E-01 | EGA2-1 |
| ENSMMUG00000023810  | MARS2     | Methionyl-tRNA Synthetase 2, Mitochondrial                            | 0.23  | 1.38   | 2.23   | 3.75   | 3.37 | 7.87E-03 | -0.56 | 7.35E-01 | 1.64  | 4.38E-01 | EGA2-1 |
| ENSMMUG00000012517  |           |                                                                       | 96.14 | 239.18 | 242.26 | 150.89 | 1.16 | 4.70E-03 | 0.16  | 7.78E-01 | -0.49 | 5.15E-01 | EGA2-1 |
| ENSMMUG00000012537  |           |                                                                       | 44.55 | 182.04 | 276.46 | 222.40 | 2.01 | 1.71E-07 | 0.66  | 1.35E-01 | -0.25 | 8.03E-01 | EGA2-1 |
| ENSMMUG00000039214  |           |                                                                       | 2.82  | 42.96  | 6.96   | 16.05  | 3.15 | 1.58E-02 | -1.71 | 2.33E-01 | 0.39  | 9.19E-01 | EGA2-1 |
| ENSMMUG00000002775  | U2SURP    | U2 SnRNP Associated SURP Domain Containing                            | 9.31  | 30.66  | 35.52  | 24.43  | 1.70 | 2.86E-09 | -0.04 | 9.41E-01 | -0.19 | 8.03E-01 | EGA2-1 |
| ENSMMUG00000007927  | ATR       | ATR Serine/threonine Kinase                                           | 1.34  | 5.28   | 4.63   | 8.21   | 1.75 | 4.12E-03 | 0.06  | 9.53E-01 | 1.03  | 2.75E-01 | EGA2-1 |
| ENSMMUG00000048132  |           |                                                                       | 3.25  | 64.85  | 7.60   | 24.96  | 3.80 | 2.72E-03 | -2.60 | 5.34E-02 | 1.77  | 4.40E-01 | EGA2-1 |
| ENSMMUG00000043965  |           |                                                                       | 4.36  | 51.36  | 15.74  | 27.74  | 2.66 | 2.57E-02 | -0.85 | 5.57E-01 | 0.16  | 9.70E-01 | EGA2-1 |
| ENSMMUG00000039621  | ATP1B3    | ATPase Na <sup>+</sup> /K <sup>+</sup> Transporting Subunit Beta 3    | 0.64  | 10.65  | 22.38  | 6.50   | 3.74 | 2.31E-06 | 1.38  | 1.25E-01 | -0.92 | 5.65E-01 | EGA2-1 |
| ENSMMUG00000008666  | PIK3CB    | Phosphatidylinositol-4,5-bisphosphate 3-kinase Catalytic Subunit Beta | 3.30  | 27.50  | 24.27  | 14.89  | 3.02 | 5.31E-06 | -0.13 | 9.05E-01 | -0.73 | 5.97E-01 | EGA2-1 |
| ENSMMUG00000043687  |           |                                                                       | 0.01  | 4.51   | 0.80   | 1.77   | 7.68 | 4.58E-07 | -2.98 | 5.71E-02 | 1.97  | 4.60E-01 | EGA2-1 |
| ENSMMUG00000000058  | CDV3      | CDV3 Homolog                                                          | 24.66 | 206.29 | 133.18 | 47.14  | 3.19 | 1.88E-08 | -0.65 | 3.64E-01 | -1.42 | 9.06E-02 | EGA2-1 |
| ENSMMUG000000005142 |           |                                                                       | 0.39  | 2.84   | 1.77   | 1.21   | 3.83 | 4.88E-03 | -0.85 | 6.21E-01 | 0.16  | 9.74E-01 | EGA2-1 |
| ENSMMUG00000031489  |           |                                                                       | 32.07 | 85.16  | 116.46 | 131.95 | 1.26 | 5.97E-03 | 0.60  | 2.44E-01 | -0.19 | 8.80E-01 | EGA2-1 |
| ENSMMUG00000020761  | EAF1      | ELL Associated Factor 1                                               | 2.62  | 37.62  | 11.85  | 18.28  | 3.42 | 1.11E-03 | -1.75 | 1.27E-01 | 1.10  | 5.97E-01 | EGA2-1 |
| ENSMMUG00000021288  | ANKRD28   | Ankyrin Repeat Domain 28                                              | 0.32  | 2.45   | 3.82   | 6.75   | 3.24 | 6.00E-04 | 0.97  | 3.94E-01 | 0.22  | 9.48E-01 | EGA2-1 |
| ENSMMUG00000022692  | DPH3      | Diphthamide Biosynthesis 3                                            | 1.32  | 9.86   | 10.34  | 7.33   | 2.51 | 3.53E-07 | 0.48  | 4.43E-01 | -0.10 | 9.59E-01 | EGA2-1 |

|                    |          |                                                         |       |        |        |        |      |          |       |          |       |          |        |
|--------------------|----------|---------------------------------------------------------|-------|--------|--------|--------|------|----------|-------|----------|-------|----------|--------|
| ENSMMUG0000005643  |          |                                                         | 0.78  | 14.16  | 15.99  | 2.99   | 4.82 | 3.76E-08 | -0.78 | 4.92E-01 | -1.60 | 2.75E-01 | EGA2-1 |
| ENSMMUG0000006353  |          |                                                         | 41.14 | 118.00 | 165.94 | 162.52 | 1.61 | 3.89E-04 | 0.34  | 5.59E-01 | -0.33 | 7.56E-01 | EGA2-1 |
| ENSMMUG00000022240 | NR1D2    | Nuclear Receptor Subfamily 1 Group D Member 2           | 2.07  | 13.07  | 10.98  | 4.41   | 3.08 | 2.08E-05 | -0.46 | 6.36E-01 | -1.20 | 3.23E-01 | EGA2-1 |
| ENSMMUG00000016917 | UBP1     | Upstream Binding Protein 1                              | 1.02  | 11.72  | 19.16  | 13.74  | 3.31 | 1.78E-08 | 1.17  | 7.99E-02 | -0.39 | 7.98E-01 | EGA2-1 |
| ENSMMUG00000008607 |          |                                                         | 0.57  | 3.24   | 2.06   | 4.10   | 2.23 | 5.97E-04 | 0.14  | 8.89E-01 | 0.35  | 8.34E-01 | EGA2-1 |
| ENSMMUG00000038284 |          |                                                         | 27.32 | 75.09  | 115.12 | 181.42 | 4.46 | 2.95E-04 | -2.23 | 7.79E-02 | 0.22  | 9.60E-01 | EGA2-1 |
| ENSMMUG00000023553 | MAP1LC3B | Microtubule Associated Protein 1 Light Chain 3 Beta     | 36.75 | 97.26  | 121.62 | 65.22  | 1.05 | 2.77E-02 | 0.61  | 2.40E-01 | -0.93 | 1.65E-01 | EGA2-1 |
| ENSMMUG00000020153 |          |                                                         | 55.35 | 341.16 | 280.90 | 212.18 | 2.24 | 2.11E-04 | 0.12  | 8.94E-01 | -0.75 | 5.07E-01 | EGA2-1 |
| ENSMMUG00000002114 | TFRC     | Transferrin Receptor                                    | 2.64  | 278.73 | 275.88 | 193.62 | 6.28 | 3.30E-23 | 0.06  | 9.59E-01 | -0.33 | 8.62E-01 | EGA2-1 |
| ENSMMUG00000019100 | UBXN7    | UBX Domain Protein 7                                    | 2.32  | 10.91  | 11.29  | 5.16   | 2.27 | 8.24E-03 | -0.07 | 9.57E-01 | -0.44 | 8.38E-01 | EGA2-1 |
| ENSMMUG00000046408 | SMCO1    | Single-pass Membrane Protein With Coiled-coil Domains 1 | 0.35  | 12.82  | 10.41  | 1.93   | 5.90 | 1.99E-11 | -0.58 | 6.38E-01 | -1.10 | 5.34E-01 | EGA2-1 |
| ENSMMUG00000007825 | NCBP2    | Nuclear Cap Binding Protein Subunit 2                   | 6.84  | 39.42  | 28.07  | 18.41  | 2.46 | 4.85E-03 | 0.08  | 9.54E-01 | -1.68 | 1.93E-01 | EGA2-1 |
| ENSMMUG00000047256 | ZNF732   | Zinc Finger Protein 732                                 | 2.93  | 11.59  | 16.42  | 6.82   | 1.99 | 2.47E-06 | 0.10  | 8.79E-01 | -0.60 | 4.44E-01 | EGA2-1 |
| ENSMMUG00000003990 |          |                                                         | 0.01  | 1.29   | 0.39   | 0.42   | 5.19 | 2.55E-02 | -1.26 | 6.55E-01 | 0.03  | 9.97E-01 | EGA2-1 |
| ENSMMUG00000049114 |          |                                                         | 11.40 | 81.94  | 101.89 | 61.17  | 2.66 | 6.29E-09 | 0.34  | 5.86E-01 | -0.57 | 5.31E-01 | EGA2-1 |
| ENSMMUG00000017457 | PIGG     | Phosphatidylinositol Glycan Anchor Biosynthesis Class G | 0.18  | 1.67   | 3.01   | 2.77   | 2.69 | 9.26E-03 | 1.11  | 3.45E-01 | -0.49 | 8.53E-01 | EGA2-1 |
| ENSMMUG00000019945 | FGFR3    | Fibroblast Growth Factor Receptor 3                     | 0.01  | 5.96   | 11.08  | 8.40   | 9.25 | 3.99E-15 | 0.85  | 5.31E-01 | -1.36 | 5.01E-01 | EGA2-1 |
| ENSMMUG00000008385 | NOP14    | NOP14 Nucleolar Protein                                 | 3.48  | 20.56  | 14.39  | 11.11  | 2.33 | 5.65E-08 | -0.60 | 2.46E-01 | -0.29 | 7.96E-01 | EGA2-1 |
| ENSMMUG00000030394 |          |                                                         | 0.16  | 3.26   | 4.71   | 4.19   | 4.36 | 1.05E-06 | 0.96  | 3.65E-01 | -0.21 | 9.48E-01 | EGA2-1 |
| ENSMMUG00000017761 | ZNF518B  | Zinc Finger Protein 518B                                | 0.25  | 1.85   | 1.06   | 3.37   | 2.27 | 2.86E-02 | -0.19 | 8.98E-01 | 1.55  | 3.39E-01 | EGA2-1 |
| ENSMMUG00000043085 |          |                                                         | 1.68  | 4.12   | 3.09   | 5.09   | 1.51 | 1.99E-02 | -0.67 | 3.70E-01 | 0.32  | 8.45E-01 | EGA2-1 |
| ENSMMUG00000046253 | FAM200B  | Family With Sequence Similarity 200 Member B            | 1.59  | 8.78   | 4.67   | 4.54   | 2.47 | 4.87E-04 | -1.22 | 1.19E-01 | 0.29  | 8.86E-01 | EGA2-1 |
| ENSMMUG00000045567 |          |                                                         | 20.31 | 39.19  | 53.33  | 37.25  | 1.21 | 1.05E-02 | 0.24  | 7.05E-01 | -0.17 | 8.99E-01 | EGA2-1 |
| ENSMMUG00000005732 | LAP3     | Leucine Aminopeptidase 3                                | 1.78  | 29.58  | 29.65  | 24.54  | 4.03 | 2.33E-11 | -0.86 | 2.46E-01 | 1.33  | 1.66E-01 | EGA2-1 |
| ENSMMUG00000009637 | DHX15    | DEAH-box Helicase 15                                    | 9.61  | 86.17  | 68.06  | 70.72  | 2.54 | 3.30E-06 | -0.01 | 9.92E-01 | 0.49  | 6.92E-01 | EGA2-1 |
| ENSMMUG00000044937 |          |                                                         | 0.18  | 5.84   | 6.40   | 0.13   | 5.98 | 3.05E-03 | -2.95 | 1.73E-01 | -3.69 | 2.39E-01 | EGA2-1 |
| ENSMMUG00000009324 | RFC1     | Replication Factor C Subunit 1                          | 8.87  | 23.92  | 12.51  | 10.78  | 1.37 | 8.17E-03 | -0.88 | 1.07E-01 | -0.28 | 8.24E-01 | EGA2-1 |
| ENSMMUG00000013851 | LIAS     | Lipoic Acid Synthetase                                  | 2.07  | 19.82  | 13.59  | 10.89  | 2.99 | 5.30E-03 | -0.84 | 5.23E-01 | -0.09 | 9.82E-01 | EGA2-1 |
| ENSMMUG00000047751 |          |                                                         | 1.32  | 8.46   | 7.54   | 12.01  | 2.77 | 2.60E-03 | 0.14  | 9.19E-01 | 0.62  | 7.71E-01 | EGA2-1 |
| ENSMMUG00000030357 |          |                                                         | 0.06  | 13.75  | 9.11   | 4.53   | 8.26 | 9.46E-13 | -0.87 | 5.47E-01 | 0.02  | 9.97E-01 | EGA2-1 |
| ENSMMUG00000020940 | TMEM33   | Transmembrane Protein 33                                | 4.24  | 24.07  | 20.11  | 16.85  | 2.05 | 1.23E-02 | 0.28  | 8.08E-01 | -0.15 | 9.60E-01 | EGA2-1 |
| ENSMMUG00000043138 | COX7B2   | Cytochrome C Oxidase Subunit VIIb2                      | 0.24  | 3.40   | 2.87   | 2.36   | 3.69 | 2.43E-02 | 1.08  | 5.66E-01 | 0.88  | 8.15E-01 | EGA2-1 |
| ENSMMUG00000048062 |          |                                                         | 8.09  | 27.71  | 19.77  | 37.52  | 1.75 | 6.20E-03 | -0.39 | 6.34E-01 | 0.83  | 4.58E-01 | EGA2-1 |
| ENSMMUG00000008514 | LIN54    | Lin-54 DREAM MuvB Core Complex Component                | 5.94  | 18.99  | 12.94  | 13.81  | 1.32 | 1.64E-02 | -0.64 | 2.98E-01 | -0.10 | 9.58E-01 | EGA2-1 |
| ENSMMUG00000008501 | SEC31A   | SEC31 Homolog A, COPII Coat Complex Component           | 19.00 | 33.60  | 47.97  | 28.71  | 0.77 | 4.92E-02 | 0.32  | 4.86E-01 | -0.32 | 6.91E-01 | EGA2-1 |
| ENSMMUG00000048621 |          |                                                         | 6.43  | 59.99  | 25.75  | 27.86  | 2.40 | 5.86E-03 | -0.98 | 3.28E-01 | 0.86  | 6.17E-01 | EGA2-1 |
| ENSMMUG00000015777 | HNRNPDL  | Heterogeneous Nuclear Ribonucleoprotein D Like          | 34.65 | 114.85 | 120.08 | 68.59  | 1.89 | 5.20E-07 | -0.27 | 5.88E-01 | -0.31 | 7.24E-01 | EGA2-1 |
| ENSMMUG00000007366 |          |                                                         | 2.38  | 25.53  | 93.41  | 103.61 | 3.55 | 4.62E-05 | 1.83  | 5.32E-02 | 0.41  | 8.67E-01 | EGA2-1 |
| ENSMMUG00000014501 | PAQR3    | Progesterone And AdipoQ Receptor Family Member 3        | 0.24  | 1.41   | 4.01   | 3.44   | 3.71 | 1.21E-02 | 1.12  | 4.83E-01 | 1.14  | 6.88E-01 | EGA2-1 |
| ENSMMUG00000030316 |          |                                                         | 2.77  | 35.14  | 50.98  | 21.33  | 3.17 | 4.36E-07 | 0.97  | 1.84E-01 | -0.79 | 5.21E-01 | EGA2-1 |
| ENSMMUG00000003835 |          |                                                         | 16.63 | 55.14  | 101.29 | 99.67  | 1.79 | 2.94E-03 | 1.11  | 8.21E-02 | -0.29 | 8.57E-01 | EGA2-1 |



|                    |              |                                                       |        |         |         |        |      |          |       |          |       |          |        |
|--------------------|--------------|-------------------------------------------------------|--------|---------|---------|--------|------|----------|-------|----------|-------|----------|--------|
| ENSMMUG0000000380  | GRSF1        | G-rich RNA Sequence Binding Factor 1                  | 9.98   | 32.41   | 43.08   | 19.64  | 1.57 | 1.37E-02 | 0.58  | 4.38E-01 | -1.01 | 3.08E-01 | EGA2-1 |
| ENSMMUG00000022339 | LOC106998368 | Surfeit Locus Protein 6                               | 0.44   | 19.25   | 15.36   | 7.01   | 5.58 | 3.79E-12 | -0.96 | 3.37E-01 | -0.70 | 7.13E-01 | EGA2-1 |
| ENSMMUG00000014229 | UTP3         | UTP3, Small Subunit Processome Component              | 14.39  | 93.83   | 77.51   | 41.15  | 2.36 | 3.64E-05 | -0.52 | 4.75E-01 | -0.99 | 2.92E-01 | EGA2-1 |
| ENSMMUG00000030258 | LOC710583    | 40S Ribosomal Protein S28 Pseudogene                  | 1.36   | 8.48    | 7.89    | 2.77   | 2.21 | 2.06E-02 | 0.34  | 7.95E-01 | -0.86 | 6.57E-01 | EGA2-1 |
| ENSMMUG00000018821 | REST         | RE1 Silencing Transcription Factor                    | 22.01  | 43.89   | 60.78   | 46.24  | 1.05 | 3.79E-02 | 0.46  | 4.23E-01 | -0.63 | 4.59E-01 | EGA2-1 |
| ENSMMUG00000016362 | PPAT         | Phosphoribosyl Pyrophosphate Amidotransferase         | 3.05   | 46.57   | 41.10   | 17.66  | 4.38 | 1.26E-13 | -0.44 | 5.88E-01 | -0.54 | 6.95E-01 | EGA2-1 |
| ENSMMUG00000048788 |              |                                                       | 1.20   | 2.67    | 7.88    | 1.10   | 2.85 | 2.19E-02 | -2.37 | 6.94E-02 | -0.56 | 8.64E-01 | EGA2-1 |
| ENSMMUG00000007951 | ERVMER34-1   | Endogenous Retrovirus Group MER34 Member 1, Envelope  | 0.32   | 16.19   | 15.40   | 8.46   | 5.44 | 2.96E-12 | 0.50  | 6.46E-01 | -1.19 | 4.13E-01 | EGA2-1 |
| ENSMMUG00000043545 |              |                                                       | 1.94   | 1021.49 | 1280.15 | 191.31 | 9.00 | 1.48E-33 | 0.07  | 9.59E-01 | -2.13 | 5.23E-02 | EGA2-1 |
| ENSMMUG00000010318 | PYURF        | PIGY Upstream Reading Frame                           | 0.26   | 4.55    | 15.01   | 3.75   | 3.05 | 6.69E-03 | 1.59  | 1.88E-01 | -0.59 | 8.31E-01 | EGA2-1 |
| ENSMMUG00000042631 |              |                                                       | 4.64   | 21.79   | 32.58   | 35.77  | 1.74 | 7.31E-04 | 0.92  | 9.59E-02 | -0.08 | 9.69E-01 | EGA2-1 |
| ENSMMUG00000011062 | METAP1       | Methionyl Aminopeptidase 1                            | 0.55   | 15.34   | 39.64   | 20.12  | 4.43 | 4.41E-08 | 1.39  | 1.37E-01 | -0.29 | 9.10E-01 | EGA2-1 |
| ENSMMUG00000038454 | LOC701962    | Histone H2A.Z-like                                    | 4.12   | 363.75  | 239.47  | 81.40  | 6.11 | 3.90E-26 | -0.83 | 2.57E-01 | -0.87 | 4.43E-01 | EGA2-1 |
| ENSMMUG00000006011 |              |                                                       | 15.57  | 40.48   | 31.74   | 22.58  | 1.31 | 3.48E-02 | -0.35 | 6.47E-01 | -0.56 | 6.48E-01 | EGA2-1 |
| ENSMMUG00000039411 |              |                                                       | 0.59   | 2.70    | 3.00    | 3.77   | 2.82 | 2.81E-03 | -0.38 | 7.69E-01 | 0.04  | 9.92E-01 | EGA2-1 |
| ENSMMUG00000023240 | SEC24B       | SEC24 Homolog B, COPII Coat Complex Component         | 9.89   | 38.65   | 45.12   | 22.03  | 1.72 | 8.14E-04 | 0.40  | 5.43E-01 | -1.26 | 7.44E-02 | EGA2-1 |
| ENSMMUG00000040183 |              |                                                       | 2.27   | 22.20   | 38.37   | 33.73  | 3.21 | 4.31E-06 | 0.48  | 6.07E-01 | -0.01 | 9.97E-01 | EGA2-1 |
| ENSMMUG00000015260 | PRSS12       | Protease, Serine 12                                   | 0.33   | 3.67    | 4.37    | 5.21   | 3.59 | 3.85E-09 | -0.01 | 9.91E-01 | 0.14  | 9.51E-01 | EGA2-1 |
| ENSMMUG00000022751 | MFSD8        | Major Facilitator Superfamily Domain Containing 8     | 0.42   | 2.36    | 12.96   | 4.01   | 2.62 | 2.51E-02 | 1.38  | 2.80E-01 | -0.83 | 7.42E-01 | EGA2-1 |
| ENSMMUG00000020931 | ABHD18       | Abhydrolase Domain Containing 18                      | 0.41   | 1.91    | 1.95    | 2.77   | 2.49 | 2.15E-02 | 0.26  | 8.66E-01 | 0.21  | 9.53E-01 | EGA2-1 |
| ENSMMUG00000030153 | LOC695218    | 40S Ribosomal Protein S25                             | 246.64 | 663.76  | 823.78  | 560.07 | 1.28 | 1.59E-03 | 0.34  | 4.99E-01 | -0.49 | 5.18E-01 | EGA2-1 |
| ENSMMUG00000004983 |              |                                                       | 11.08  | 123.43  | 85.98   | 19.48  | 3.50 | 1.13E-07 | -1.23 | 1.02E-01 | -1.02 | 3.92E-01 | EGA2-1 |
| ENSMMUG00000004984 | ELF2         | E74 Like ETS Transcription Factor 2                   | 1.03   | 6.23    | 9.55    | 12.53  | 2.73 | 1.07E-04 | 0.98  | 2.29E-01 | 0.02  | 9.93E-01 | EGA2-1 |
| ENSMMUG00000018184 | NAA15        | N(alpha)-acetyltransferase 15, NatA Auxiliary Subunit | 11.00  | 26.26   | 25.26   | 19.75  | 1.18 | 2.41E-02 | -0.10 | 8.90E-01 | -0.14 | 9.26E-01 | EGA2-1 |
| ENSMMUG00000046039 |              |                                                       | 6.31   | 14.57   | 30.85   | 22.57  | 1.37 | 4.23E-02 | 1.10  | 1.08E-01 | -0.30 | 8.57E-01 | EGA2-1 |
| ENSMMUG00000048797 | LOC106998524 | Uncharacterized LOC106998524                          | 0.01   | 0.24    | 0.24    | 1.34   | 5.05 | 5.93E-03 | -0.98 | 6.53E-01 | 3.96  | 9.75E-02 | EGA2-1 |
| ENSMMUG00000039834 |              |                                                       | 0.16   | 1.45    | 1.91    | 1.62   | 3.91 | 2.32E-02 | -0.05 | 9.85E-01 | -0.66 | 8.80E-01 | EGA2-1 |
| ENSMMUG00000004440 |              |                                                       | 0.36   | 4.63    | 4.37    | 2.57   | 2.96 | 1.13E-02 | 0.77  | 5.88E-01 | -0.93 | 7.05E-01 | EGA2-1 |
| ENSMMUG00000030117 | LOC703794    | Ribosomal Protein L22-like                            | 11.05  | 55.28   | 133.76  | 142.93 | 2.56 | 2.22E-03 | 1.23  | 1.84E-01 | 0.53  | 7.96E-01 | EGA2-1 |
| ENSMMUG00000030101 |              |                                                       | 0.45   | 3.73    | 12.21   | 10.71  | 2.79 | 9.35E-03 | 0.85  | 5.05E-01 | 1.05  | 6.12E-01 | EGA2-1 |
| ENSMMUG00000044274 | LRAT         | Lecithin Retinol Acyltransferase                      | 0.19   | 1.42    | 0.67    | 0.57   | 3.01 | 4.86E-02 | 0.25  | 9.08E-01 | 0.27  | 9.61E-01 | EGA2-1 |
| ENSMMUG00000017768 |              |                                                       | 12.90  | 46.79   | 48.63   | 36.51  | 1.63 | 3.25E-03 | -0.38 | 5.91E-01 | 0.76  | 4.29E-01 | EGA2-1 |
| ENSMMUG00000043129 |              |                                                       | 1.22   | 7.76    | 7.33    | 8.64   | 2.31 | 1.60E-02 | 0.46  | 7.12E-01 | 0.08  | 9.82E-01 | EGA2-1 |
| ENSMMUG00000030042 | LOC702297    | 60S Ribosomal Protein L23a Pseudogene                 | 231.41 | 954.18  | 848.51  | 762.00 | 2.07 | 9.43E-09 | -0.06 | 9.18E-01 | -0.23 | 8.06E-01 | EGA2-1 |
| ENSMMUG00000004482 | TMA16        | Translation Machinery Associated 16 Homolog           | 0.94   | 7.32    | 9.95    | 10.97  | 2.96 | 1.02E-02 | 0.26  | 8.76E-01 | 0.81  | 7.53E-01 | EGA2-1 |
| ENSMMUG00000046210 |              |                                                       | 1.48   | 7.30    | 17.31   | 10.63  | 2.88 | 1.49E-03 | 0.19  | 8.88E-01 | 0.22  | 9.42E-01 | EGA2-1 |
| ENSMMUG00000031047 |              |                                                       | 257.17 | 688.56  | 605.68  | 364.99 | 1.31 | 5.89E-05 | -0.24 | 5.75E-01 | -0.51 | 3.60E-01 | EGA2-1 |
| ENSMMUG00000000062 |              |                                                       | 1.53   | 7.81    | 7.40    | 6.10   | 2.03 | 1.67E-02 | -0.46 | 6.77E-01 | 0.36  | 8.74E-01 | EGA2-1 |
| ENSMMUG00000045077 | UBE2G2       | Ubiquitin Conjugating Enzyme E2 G2                    | 3.52   | 18.27   | 19.37   | 13.06  | 2.07 | 7.15E-03 | 0.18  | 8.72E-01 | 0.16  | 9.52E-01 | EGA2-1 |
| ENSMMUG00000010648 |              |                                                       | 0.09   | 7.56    | 41.42   | 78.02  | 7.62 | 1.19E-12 | 1.91  | 1.01E-01 | 1.03  | 6.47E-01 | EGA2-1 |

|                    |              |                                                                                                                            |        |        |        |        |      |          |       |          |       |          |        |
|--------------------|--------------|----------------------------------------------------------------------------------------------------------------------------|--------|--------|--------|--------|------|----------|-------|----------|-------|----------|--------|
| ENSMMUG00000012304 | RRP1         | Ribosomal RNA Processing 1                                                                                                 | 1.93   | 10.03  | 6.73   | 6.06   | 2.40 | 9.05E-03 | -0.22 | 8.70E-01 | -0.33 | 8.99E-01 | EGA2-1 |
| ENSMMUG0000000104  | RRP1B        | Ribosomal RNA Processing 1B                                                                                                | 3.83   | 26.70  | 13.30  | 7.38   | 2.76 | 1.66E-03 | -0.76 | 4.80E-01 | -0.67 | 7.34E-01 | EGA2-1 |
| ENSMMUG00000022769 | U2AF1        | U2 Small Nuclear RNA Auxiliary Factor 1                                                                                    | 23.71  | 80.20  | 113.82 | 57.62  | 1.86 | 2.69E-02 | 0.42  | 7.02E-01 | -0.40 | 8.51E-01 | EGA2-1 |
| ENSMMUG00000009289 | CBS          | Cystathionine-beta-synthase                                                                                                | 0.02   | 1.43   | 2.90   | 3.51   | 7.63 | 1.01E-05 | -0.29 | 9.10E-01 | -0.89 | 8.35E-01 | EGA2-1 |
| ENSMMUG00000044879 | LOC106997228 | Suppressyn                                                                                                                 | 0.01   | 6.28   | 12.74  | 9.68   | 6.26 | 2.77E-03 | 0.89  | 7.30E-01 | 2.23  | 5.30E-01 | EGA2-1 |
| ENSMMUG00000022130 | LOC698099    | 40S Ribosomal Protein S4, X Isoform-like                                                                                   | 45.15  | 174.87 | 297.78 | 188.23 | 2.12 | 5.08E-09 | 0.74  | 7.31E-02 | -0.69 | 2.46E-01 | EGA2-1 |
| ENSMMUG00000022702 | GART         | Phosphoribosylglycinamide Formyltransferase, Phosphoribosylglycinamide Synthetase, Phosphoribosylaminoimidazole Synthetase | 1.70   | 10.14  | 14.71  | 13.31  | 2.02 | 8.29E-03 | 0.75  | 3.99E-01 | 0.49  | 7.88E-01 | EGA2-1 |
| ENSMMUG00000010295 | URB1         | URB1 Ribosome Biogenesis 1 Homolog (S. Cerevisiae)                                                                         | 0.16   | 7.20   | 5.53   | 7.09   | 5.54 | 7.12E-10 | -0.18 | 9.02E-01 | 0.39  | 8.86E-01 | EGA2-1 |
| ENSMMUG00000049182 |              |                                                                                                                            | 67.41  | 231.44 | 171.65 | 178.85 | 1.87 | 2.82E-05 | -0.58 | 2.76E-01 | 0.02  | 9.91E-01 | EGA2-1 |
| ENSMMUG00000030448 |              |                                                                                                                            | 7.59   | 81.63  | 104.04 | 112.63 | 3.76 | 1.01E-18 | 0.33  | 5.70E-01 | -0.06 | 9.71E-01 | EGA2-1 |
| ENSMMUG00000045836 |              |                                                                                                                            | 10.43  | 55.92  | 78.17  | 85.32  | 2.58 | 1.07E-07 | 0.39  | 5.43E-01 | 0.35  | 7.74E-01 | EGA2-1 |
| ENSMMUG00000030445 | LOC710317    | 60S Ribosomal Protein L36 Pseudogene                                                                                       | 45.05  | 195.17 | 297.29 | 212.61 | 1.87 | 1.54E-04 | 0.84  | 1.26E-01 | -0.70 | 4.30E-01 | EGA2-1 |
| ENSMMUG00000002116 | BTG3         | BTG Anti-proliferation Factor 3                                                                                            | 0.52   | 24.27  | 23.54  | 38.25  | 5.35 | 1.28E-08 | 0.39  | 7.84E-01 | 0.41  | 8.86E-01 | EGA2-1 |
| ENSMMUG00000010755 | CXADR        | CXADR, Ig-like Cell Adhesion Molecule                                                                                      | 1.78   | 60.95  | 88.45  | 65.98  | 5.44 | 5.97E-15 | 0.82  | 3.55E-01 | -1.19 | 3.36E-01 | EGA2-1 |
| ENSMMUG00000040411 |              |                                                                                                                            | 0.51   | 2.27   | 3.28   | 4.33   | 2.26 | 9.60E-03 | 1.20  | 2.04E-01 | 0.76  | 6.73E-01 | EGA2-1 |
| ENSMMUG00000004949 |              |                                                                                                                            | 0.77   | 7.35   | 18.84  | 54.40  | 4.80 | 1.87E-05 | 0.31  | 8.53E-01 | 1.51  | 4.61E-01 | EGA2-1 |
| ENSMMUG00000017063 | GET4         | Golgi To ER Traffic Protein 4                                                                                              | 0.57   | 2.97   | 2.48   | 5.04   | 2.53 | 2.33E-02 | -0.60 | 6.72E-01 | 2.17  | 1.67E-01 | EGA2-1 |
| ENSMMUG00000012548 | INTS1        | Integrator Complex Subunit 1                                                                                               | 2.05   | 8.67   | 5.53   | 7.48   | 1.79 | 1.26E-02 | -0.54 | 5.33E-01 | 0.32  | 8.64E-01 | EGA2-1 |
| ENSMMUG00000022074 | SNX8         | Sorting Nexin 8                                                                                                            | 0.35   | 2.64   | 4.33   | 5.40   | 3.26 | 3.85E-05 | 0.64  | 5.29E-01 | -0.53 | 7.84E-01 | EGA2-1 |
| ENSMMUG00000015529 | EIF3B        | Eukaryotic Translation Initiation Factor 3 Subunit B                                                                       | 2.88   | 10.53  | 12.68  | 12.65  | 1.81 | 4.92E-03 | 0.04  | 9.69E-01 | -0.24 | 8.95E-01 | EGA2-1 |
| ENSMMUG00000011228 | AP5Z1        | Adaptor Related Protein Complex 5 Zeta 1 Subunit                                                                           | 0.16   | 4.90   | 1.03   | 1.68   | 6.60 | 2.22E-09 | -2.16 | 6.40E-02 | -0.55 | 8.52E-01 | EGA2-1 |
| ENSMMUG00000039501 | RBAK         | RB Associated KRAB Zinc Finger                                                                                             | 0.55   | 3.76   | 8.76   | 6.21   | 2.54 | 1.32E-04 | 1.28  | 7.65E-02 | -0.26 | 8.98E-01 | EGA2-1 |
| ENSMMUG00000011153 | ACTB         | Actin Beta                                                                                                                 | 226.15 | 404.24 | 610.64 | #####  | 0.97 | 2.45E-02 | 0.13  | 8.26E-01 | 0.97  | 9.19E-02 | EGA2-1 |
| ENSMMUG00000021075 |              |                                                                                                                            | 92.95  | 244.64 | 185.45 | 122.37 | 1.33 | 6.00E-04 | -0.30 | 5.51E-01 | -0.40 | 6.05E-01 | EGA2-1 |
| ENSMMUG00000020321 |              |                                                                                                                            | 1.01   | 5.66   | 11.19  | 6.39   | 2.55 | 1.89E-03 | 1.05  | 2.62E-01 | -0.62 | 7.41E-01 | EGA2-1 |
| ENSMMUG00000004125 | YWHAG        | Tyrosine 3-monooxygenase/tryptophan 5-monooxygenase Activation Protein Gamma                                               | 15.59  | 65.88  | 34.60  | 32.36  | 1.85 | 1.17E-04 | -0.94 | 7.32E-02 | 0.33  | 7.80E-01 | EGA2-1 |
| ENSMMUG00000005229 | HIP1         | Huntingtin Interacting Protein 1                                                                                           | 0.37   | 1.64   | 5.22   | 13.43  | 3.04 | 1.74E-02 | 0.79  | 6.16E-01 | 1.16  | 6.41E-01 | EGA2-1 |
| ENSMMUG00000022778 | TRIM50       | Tripartite Motif Containing 50                                                                                             | 0.04   | 0.72   | 0.64   | 0.29   | 4.28 | 1.39E-02 | 0.21  | 9.35E-01 | -1.21 | 7.53E-01 | EGA2-1 |
| ENSMMUG00000018842 | GTF2IRD1     | GTF2I Repeat Domain Containing 1                                                                                           | 0.55   | 1.06   | 0.72   | 1.84   | 4.06 | 6.24E-03 | -1.36 | 4.36E-01 | -0.50 | 9.07E-01 | EGA2-1 |
| ENSMMUG00000042471 |              |                                                                                                                            | 4.02   | 15.24  | 8.46   | 3.87   | 1.86 | 7.37E-03 | -0.80 | 3.17E-01 | -0.82 | 5.21E-01 | EGA2-1 |
| ENSMMUG00000045653 | SBDS         | SBDS, Ribosome Maturation Factor                                                                                           | 17.09  | 54.10  | 47.33  | 29.05  | 1.70 | 9.65E-06 | -0.65 | 1.41E-01 | -0.47 | 5.28E-01 | EGA2-1 |
| ENSMMUG00000038391 |              |                                                                                                                            | 12.95  | 57.49  | 40.84  | 31.67  | 2.16 | 2.07E-06 | -0.65 | 2.28E-01 | -0.05 | 9.77E-01 | EGA2-1 |
| ENSMMUG0000001744  | TPST1        | Tyrosylprotein Sulfotransferase 1                                                                                          | 0.82   | 3.42   | 2.08   | 1.68   | 2.02 | 3.26E-02 | -0.49 | 6.82E-01 | 0.20  | 9.48E-01 | EGA2-1 |
| ENSMMUG00000003643 | LOC709453    | Zinc Finger Protein 273                                                                                                    | 6.19   | 32.58  | 20.53  | 15.96  | 2.28 | 1.64E-04 | -0.44 | 5.75E-01 | 0.49  | 7.27E-01 | EGA2-1 |

|                    |              |                                                              |       |        |        |        |       |          |       |          |        |          |        |
|--------------------|--------------|--------------------------------------------------------------|-------|--------|--------|--------|-------|----------|-------|----------|--------|----------|--------|
| ENSMMUG0000009138  | LOC710449    | Zinc Finger Protein 680                                      | 5.97  | 18.56  | 23.50  | 24.78  | 1.30  | 1.21E-02 | 0.41  | 5.14E-01 | 0.09   | 9.64E-01 | EGA2-1 |
| ENSMMUG00000047463 |              |                                                              | 0.51  | 4.38   | 8.24   | 11.38  | 2.67  | 2.76E-02 | 1.26  | 3.50E-01 | -0.17  | 9.68E-01 | EGA2-1 |
| ENSMMUG00000037668 |              |                                                              | 0.00  | 5.93   | 4.42   | 2.30   | 24.57 | 2.90E-33 | 0.51  | 8.69E-01 | -3.48  | 3.04E-01 | EGA2-1 |
| ENSMMUG00000011916 | LOC694593    | Enolase 1-like                                               | 1.97  | 22.27  | 34.88  | 29.86  | 3.73  | 8.84E-14 | 0.81  | 1.79E-01 | -0.13  | 9.45E-01 | EGA2-1 |
| ENSMMUG00000041095 |              |                                                              | 3.14  | 8.10   | 8.78   | 5.50   | 1.76  | 4.01E-02 | -0.11 | 9.31E-01 | -1.20  | 4.04E-01 | EGA2-1 |
| ENSMMUG00000010823 | TBRG4        | Transforming Growth Factor Beta Regulator 4                  | 0.49  | 10.85  | 18.04  | 28.97  | 4.78  | 5.18E-09 | 0.73  | 4.94E-01 | 0.51   | 8.12E-01 | EGA2-1 |
| ENSMMUG00000047932 | PURB         | Purine Rich Element Binding Protein B                        | 0.40  | 7.50   | 9.07   | 4.52   | 5.36  | 2.88E-06 | -0.67 | 6.69E-01 | 0.71   | 8.07E-01 | EGA2-1 |
| ENSMMUG00000045064 |              |                                                              | 0.35  | 11.41  | 10.28  | 24.83  | 5.23  | 1.38E-03 | -0.04 | 9.86E-01 | 1.90   | 4.95E-01 | EGA2-1 |
| ENSMMUG00000000962 | LOC705636    | Histone H2A.V-like                                           | 0.73  | 15.17  | 19.72  | 16.82  | 4.81  | 5.43E-11 | 0.21  | 8.54E-01 | 0.50   | 7.93E-01 | EGA2-1 |
| ENSMMUG00000016638 | PPIA         | Peptidylprolyl Isomerase A                                   | 40.18 | 220.89 | 365.40 | 362.43 | 2.68  | 5.00E-05 | 0.77  | 3.32E-01 | 0.73   | 5.81E-01 | EGA2-1 |
| ENSMMUG00000001702 | SUGCT        | Succinyl-CoA:glutarate-CoA Transferase                       | 0.08  | 3.60   | 0.71   | 1.22   | 6.78  | 2.90E-04 | -1.44 | 5.20E-01 | -1.38  | 7.35E-01 | EGA2-1 |
| ENSMMUG00000001701 | MPLKIP       | M-phase Specific PLK1 Interacting Protein                    | 0.51  | 7.15   | 6.60   | 9.22   | 2.60  | 7.56E-03 | 1.24  | 2.49E-01 | 0.57   | 8.06E-01 | EGA2-1 |
| ENSMMUG00000011695 | NT5C3A       | 5'-nucleotidase, Cytosolic IIIA                              | 0.29  | 1.88   | 0.48   | 1.23   | 2.54  | 2.51E-02 | -1.39 | 2.63E-01 | -0.94  | 6.88E-01 | EGA2-1 |
| ENSMMUG00000004719 | GARS         | Glycyl-tRNA Synthetase                                       | 12.11 | 19.67  | 27.64  | 27.45  | 1.06  | 1.60E-02 | 0.41  | 4.18E-01 | -0.71  | 2.92E-01 | EGA2-1 |
| ENSMMUG00000003619 | HNRNPA2B1    | Heterogeneous Nuclear Ribonucleoprotein A2/B1                | 53.09 | 381.65 | 481.40 | 348.36 | 2.99  | 4.89E-10 | 0.25  | 7.23E-01 | -0.17  | 9.09E-01 | EGA2-1 |
| ENSMMUG00000038151 |              |                                                              | 44.24 | 136.38 | 224.30 | 142.56 | 1.54  | 1.01E-02 | 0.78  | 2.42E-01 | -0.46  | 7.23E-01 | EGA2-1 |
| ENSMMUG00000042973 |              |                                                              | 1.38  | 3.55   | 11.03  | 0.71   | 2.70  | 2.11E-02 | -0.52 | 7.38E-01 | -2.75  | 8.58E-02 | EGA2-1 |
| ENSMMUG00000006286 | TRA2A        | Transformer 2 Alpha Homolog                                  | 4.81  | 28.65  | 39.32  | 26.28  | 2.41  | 4.37E-05 | 0.83  | 2.25E-01 | -0.89  | 3.93E-01 | EGA2-1 |
| ENSMMUG00000004841 | MALSU1       | Mitochondrial Assembly Of Ribosomal Large Subunit 1          | 0.42  | 74.12  | 47.43  | 30.06  | 7.59  | 1.06E-25 | -0.58 | 5.58E-01 | -0.67  | 6.94E-01 | EGA2-1 |
| ENSMMUG00000038586 |              |                                                              | 8.53  | 57.54  | 71.42  | 33.45  | 3.07  | 7.71E-08 | 0.57  | 4.40E-01 | -0.70  | 5.36E-01 | EGA2-1 |
| ENSMMUG00000001411 |              |                                                              | 21.83 | 213.07 | 101.84 | 114.10 | 3.02  | 2.21E-07 | -1.00 | 1.39E-01 | 0.62   | 6.17E-01 | EGA2-1 |
| ENSMMUG00000017045 | BZW2         | Basic Leucine Zipper And W2 Domains 2                        | 9.51  | 62.47  | 56.22  | 22.65  | 2.66  | 2.17E-14 | -0.45 | 3.12E-01 | -0.80  | 1.51E-01 | EGA2-1 |
| ENSMMUG00000015516 | MTERF1       | Mitochondrial Transcription Termination Factor 1             | 0.26  | 4.36   | 9.77   | 6.20   | 4.34  | 2.81E-05 | 0.64  | 6.44E-01 | 0.74   | 7.68E-01 | EGA2-1 |
| ENSMMUG00000010781 | DMTF1        | Cyclin D Binding Myb Like Transcription Factor 1             | 7.57  | 31.79  | 15.11  | 11.84  | 1.40  | 4.54E-02 | -0.74 | 3.36E-01 | 0.55   | 7.01E-01 | EGA2-1 |
| ENSMMUG00000048399 |              |                                                              | 0.54  | 1.42   | 1.80   | 4.08   | 2.54  | 2.72E-03 | -0.68 | 5.06E-01 | 0.82   | 6.20E-01 | EGA2-1 |
| ENSMMUG00000040454 |              |                                                              | 8.07  | 34.08  | 38.36  | 40.44  | 2.27  | 1.16E-03 | -0.16 | 8.81E-01 | -0.01  | 9.97E-01 | EGA2-1 |
| ENSMMUG00000008698 | CDK6         | Cyclin Dependent Kinase 6                                    | 0.29  | 0.59   | 1.70   | 6.58   | 2.67  | 3.78E-02 | 0.27  | 8.81E-01 | 2.25   | 2.21E-01 | EGA2-1 |
| ENSMMUG00000004127 |              |                                                              | 17.39 | 85.13  | 180.35 | 137.84 | 2.36  | 1.71E-02 | 0.63  | 6.05E-01 | 0.83   | 6.85E-01 | EGA2-1 |
| ENSMMUG00000045640 |              |                                                              | 17.53 | 55.62  | 80.67  | 81.28  | 1.92  | 4.95E-03 | 0.01  | 9.90E-01 | 0.55   | 7.14E-01 | EGA2-1 |
| ENSMMUG00000011970 | NPTX2        | Neuronal Pentraxin 2                                         | 0.53  | 4.60   | 2.43   | 0.20   | 3.14  | 3.04E-02 | -0.53 | 7.84E-01 | -2.97  | 1.60E-01 | EGA2-1 |
| ENSMMUG00000000427 |              |                                                              | 4.92  | 38.44  | 33.03  | 18.00  | 3.34  | 6.21E-05 | -1.21 | 2.10E-01 | -0.84  | 6.35E-01 | EGA2-1 |
| ENSMMUG00000030408 | LOC718712    | Pentatricopeptide Repeat-containing Protein 1, Mitochondrial | 4.78  | 15.04  | 20.54  | 16.87  | 1.48  | 4.70E-02 | 0.88  | 2.69E-01 | -0.78  | 5.58E-01 | EGA2-1 |
| ENSMMUG00000021255 | SRRT         | Serrate, RNA Effector Molecule                               | 7.51  | 27.08  | 16.66  | 10.27  | 1.87  | 3.91E-04 | -0.63 | 3.11E-01 | -0.73  | 4.41E-01 | EGA2-1 |
| ENSMMUG00000045197 |              |                                                              | 0.26  | 1.51   | 1.02   | 1.03   | 2.92  | 1.64E-02 | -0.36 | 8.31E-01 | -0.72  | 8.11E-01 | EGA2-1 |
| ENSMMUG00000006949 | PLOD3        | Procollagen-lysine,2-oxoglutarate 5-dioxygenase 3            | 1.97  | 7.92   | 2.54   | 4.93   | 2.37  | 1.40E-02 | -1.81 | 6.82E-02 | 1.70   | 2.36E-01 | EGA2-1 |
| ENSMMUG00000006951 | ZNHIT1       | Zinc Finger HIT-type Containing 1                            | 0.53  | 3.43   | 2.86   | 3.22   | 3.10  | 5.94E-05 | -0.08 | 9.47E-01 | 0.39   | 8.53E-01 | EGA2-1 |
| ENSMMUG00000007839 | FIS1         | Fission, Mitochondrial 1                                     | 0.17  | 1.85   | 2.62   | 2.46   | 3.27  | 1.06E-02 | 0.59  | 7.30E-01 | 0.38   | 9.19E-01 | EGA2-1 |
| ENSMMUG00000048852 | COL26A1      | Collagen Type XXVI Alpha 1 Chain                             | 0.00  | 0.08   | 0.34   | 0.78   | 25.58 | 6.35E-05 | -3.48 | 6.93E-01 | -0.48  | 9.85E-01 | EGA2-1 |
| ENSMMUG00000033906 |              |                                                              | 0.00  | 1.60   | 4.47   | 0.27   | 28.12 | 1.71E-08 | 0.51  | 9.53E-01 | -11.55 | 1.30E-01 | EGA2-1 |
| ENSMMUG00000046923 | LOC100423207 | 40S Ribosomal Protein S27-like                               | 4.98  | 26.17  | 45.28  | 43.05  | 2.31  | 4.68E-07 | 0.80  | 1.29E-01 | 0.22   | 8.69E-01 | EGA2-1 |

|                    |              |                                                                              |        |         |        |        |       |          |       |          |       |          |        |
|--------------------|--------------|------------------------------------------------------------------------------|--------|---------|--------|--------|-------|----------|-------|----------|-------|----------|--------|
| ENSMMUG00000012399 |              |                                                                              | 11.44  | 29.81   | 33.60  | 28.78  | 1.33  | 3.01E-03 | -0.40 | 4.59E-01 | 0.37  | 7.02E-01 | EGA2-1 |
| ENSMMUG00000037576 |              |                                                                              | 0.50   | 1.51    | 2.67   | 2.21   | 1.69  | 4.96E-02 | 0.72  | 4.61E-01 | -0.15 | 9.60E-01 | EGA2-1 |
| ENSMMUG00000015421 | GCC1         | GRIP And Coiled-coil Domain Containing 1                                     | 0.61   | 9.05    | 2.98   | 3.29   | 3.20  | 9.58E-04 | -1.18 | 2.92E-01 | 1.13  | 5.36E-01 | EGA2-1 |
| ENSMMUG00000007250 | RBM28        | RNA Binding Motif Protein 28                                                 | 9.22   | 33.64   | 17.20  | 10.80  | 1.93  | 6.50E-03 | -0.94 | 2.32E-01 | -0.63 | 6.67E-01 | EGA2-1 |
| ENSMMUG00000014509 | IMPDH1       | Inosine Monophosphate Dehydrogenase 1                                        | 0.40   | 13.84   | 7.16   | 2.46   | 4.26  | 2.54E-04 | -0.61 | 7.06E-01 | -0.97 | 7.12E-01 | EGA2-1 |
| ENSMMUG00000015870 | LOC716645    | Sugar Phosphate Exchanger 3-like                                             | 1.41   | 7.25    | 9.15   | 7.06   | 2.58  | 4.52E-05 | 0.07  | 9.47E-01 | 0.09  | 9.72E-01 | EGA2-1 |
| ENSMMUG00000010420 | MKRN1        | Makorin Ring Finger Protein 1                                                | 14.61  | 122.95  | 75.96  | 61.86  | 2.97  | 1.32E-05 | -0.64 | 4.58E-01 | -0.44 | 8.00E-01 | EGA2-1 |
| ENSMMUG00000012635 | ZYX          | Zyxin                                                                        | 1.45   | 8.69    | 8.47   | 16.34  | 2.27  | 2.98E-02 | -0.20 | 8.96E-01 | 1.68  | 2.86E-01 | EGA2-1 |
| ENSMMUG00000039361 | ZBED6CL      | ZBED6 C-terminal Like                                                        | 0.07   | 0.75    | 0.34   | 0.48   | 8.81  | 1.01E-05 | -1.78 | 4.41E-01 | 0.45  | 9.47E-01 | EGA2-1 |
| ENSMMUG00000007237 | LOC100427305 | 40S Ribosomal Protein S15a Pseudogene                                        | 45.87  | 201.10  | 342.94 | 208.75 | 2.38  | 2.64E-11 | 0.70  | 8.78E-02 | -0.66 | 2.71E-01 | EGA2-1 |
| ENSMMUG00000008733 | UBE3C        | Ubiquitin Protein Ligase E3C                                                 | 1.07   | 8.33    | 13.76  | 8.47   | 2.68  | 7.94E-04 | 1.14  | 2.06E-01 | -1.33 | 3.00E-01 | EGA2-1 |
| ENSMMUG00000003194 | LOC722597    | Probable Palmitoyltransferase ZDHHC11                                        | 0.02   | 0.80    | 0.65   | 0.44   | 4.18  | 1.63E-02 | 1.16  | 5.48E-01 | 1.47  | 6.64E-01 | EGA2-1 |
| ENSMMUG00000020112 | CCT5         | Chaperonin Containing TCP1 Subunit 5                                         | 20.45  | 64.59   | 75.43  | 75.91  | 1.43  | 3.20E-04 | 0.36  | 4.73E-01 | 0.03  | 9.82E-01 | EGA2-1 |
| ENSMMUG00000044088 |              |                                                                              | 44.15  | 168.98  | 246.21 | 194.05 | 1.91  | 8.45E-11 | 0.63  | 5.96E-02 | -0.24 | 7.38E-01 | EGA2-1 |
| ENSMMUG00000005611 |              |                                                                              | 0.28   | 1.76    | 2.29   | 1.57   | 3.77  | 2.02E-03 | -0.09 | 9.62E-01 | -1.96 | 3.00E-01 | EGA2-1 |
| ENSMMUG00000016086 |              |                                                                              | 24.31  | 65.71   | 47.17  | 28.25  | 1.60  | 3.11E-03 | -0.78 | 1.90E-01 | -0.78 | 3.92E-01 | EGA2-1 |
| ENSMMUG00000030178 | LOC701473    | Prothymosin Alpha-like                                                       | 140.56 | 1143.96 | 707.75 | 498.09 | 2.66  | 3.96E-07 | -0.48 | 4.76E-01 | -0.32 | 8.15E-01 | EGA2-1 |
| ENSMMUG00000000704 | NUP155       | Nucleoporin 155                                                              | 9.62   | 40.41   | 22.99  | 26.83  | 1.82  | 5.99E-03 | -0.58 | 4.61E-01 | -0.06 | 9.82E-01 | EGA2-1 |
| ENSMMUG00000019879 | DAB2         | DAB2, Clathrin Adaptor Protein                                               | 1.10   | 26.42   | 34.70  | 111.12 | 3.68  | 2.77E-05 | 1.10  | 2.93E-01 | 1.00  | 5.64E-01 | EGA2-1 |
| ENSMMUG00000011877 | C6H5orf34    | Chromosome 6 Open Reading Frame, Human C5orf34                               | 1.57   | 8.57    | 3.97   | 4.09   | 2.26  | 8.88E-04 | -1.25 | 8.88E-02 | 0.96  | 4.20E-01 | EGA2-1 |
| ENSMMUG00000030135 |              |                                                                              | 1.68   | 6.79    | 10.03  | 9.13   | 2.05  | 2.15E-02 | 0.91  | 3.67E-01 | -1.12 | 4.62E-01 | EGA2-1 |
| ENSMMUG00000016180 | MRPS30       | Mitochondrial Ribosomal Protein S30                                          | 0.66   | 32.72   | 43.76  | 37.16  | 5.05  | 3.60E-21 | 0.92  | 1.52E-01 | 0.52  | 6.78E-01 | EGA2-1 |
| ENSMMUG00000005177 | PLK2         | Polo Like Kinase 2                                                           | 0.02   | 3.09    | 3.38   | 0.99   | 4.34  | 6.55E-04 | 1.03  | 5.13E-01 | -2.27 | 2.47E-01 | EGA2-1 |
| ENSMMUG00000014211 | ELOVL7       | ELOVL Fatty Acid Elongase 7                                                  | 0.02   | 0.32    | 2.21   | 4.01   | 4.29  | 6.20E-04 | 2.34  | 5.15E-02 | 1.04  | 6.66E-01 | EGA2-1 |
| ENSMMUG00000030102 | MCIDAS       | Multiciliate Differentiation And DNA Synthesis Associated Cell Cycle Protein | 0.00   | 0.83    | 2.62   | 0.09   | 21.88 | 3.85E-30 | -0.88 | 7.39E-01 | -1.18 | 8.06E-01 | EGA2-1 |
| ENSMMUG00000010376 | DHX29        | DExH-box Helicase 29                                                         | 1.94   | 6.69    | 9.96   | 10.51  | 2.03  | 5.85E-07 | 0.64  | 1.79E-01 | -0.26 | 8.06E-01 | EGA2-1 |
| ENSMMUG00000001233 | IPO11        | Importin 11                                                                  | 0.39   | 5.73    | 10.51  | 9.85   | 3.92  | 1.52E-08 | 1.08  | 1.88E-01 | -0.13 | 9.63E-01 | EGA2-1 |
| ENSMMUG00000037585 | LRRC70       | Leucine Rich Repeat Containing 70                                            | 0.02   | 0.34    | 0.18   | 1.12   | 3.68  | 4.79E-02 | 0.18  | 9.44E-01 | 3.53  | 1.30E-01 | EGA2-1 |
| ENSMMUG00000030159 | LOC100429388 | Peptidyl-prolyl Cis-trans Isomerase A Pseudogene                             | 26.65  | 140.20  | 246.35 | 246.97 | 2.69  | 5.52E-05 | 0.82  | 3.03E-01 | 0.81  | 5.26E-01 | EGA2-1 |
| ENSMMUG00000018100 |              |                                                                              | 0.09   | 3.39    | 0.80   | 0.69   | 5.34  | 5.82E-04 | -2.45 | 1.52E-01 | 0.40  | 9.39E-01 | EGA2-1 |
| ENSMMUG00000043517 | AK6          | Adenylate Kinase 6                                                           | 1.03   | 5.95    | 7.95   | 5.88   | 2.56  | 3.18E-02 | -0.13 | 9.44E-01 | 0.46  | 8.87E-01 | EGA2-1 |
| ENSMMUG00000014881 | RAD17        | RAD17 Checkpoint Clamp Loader Component                                      | 3.13   | 9.54    | 8.29   | 5.85   | 1.40  | 4.58E-03 | -0.16 | 8.17E-01 | -0.19 | 8.96E-01 | EGA2-1 |
| ENSMMUG00000009158 | MARVELD2     | MARVEL Domain Containing 2                                                   | 0.59   | 1.83    | 2.56   | 4.53   | 2.37  | 2.19E-02 | -0.64 | 6.16E-01 | 1.54  | 3.44E-01 | EGA2-1 |
| ENSMMUG00000015422 | FCHO2        | FCH Domain Only 2                                                            | 2.71   | 8.72    | 5.37   | 7.25   | 1.28  | 3.22E-02 | -0.16 | 8.48E-01 | -0.09 | 9.66E-01 | EGA2-1 |
| ENSMMUG00000017092 |              |                                                                              | 12.97  | 32.08   | 32.21  | 27.90  | 1.44  | 1.31E-02 | -0.48 | 4.88E-01 | -0.06 | 9.79E-01 | EGA2-1 |
| ENSMMUG00000023514 | UTP15        | UTP15, Small Subunit Processome Component                                    | 1.98   | 24.52   | 21.55  | 15.84  | 3.50  | 7.34E-09 | 0.09  | 9.29E-01 | -0.30 | 8.59E-01 | EGA2-1 |
| ENSMMUG00000030006 |              |                                                                              | 16.32  | 72.24   | 103.72 | 115.77 | 2.36  | 2.00E-04 | 0.67  | 3.84E-01 | -0.03 | 9.88E-01 | EGA2-1 |
| ENSMMUG00000013264 |              |                                                                              | 0.19   | 1.91    | 2.03   | 1.79   | 3.19  | 1.37E-03 | 0.44  | 7.42E-01 | -1.08 | 5.76E-01 | EGA2-1 |
| ENSMMUG00000043533 | GCNT4        | Glucosaminyl (N-acetyl) Transferase 4, Core 2                                | 0.01   | 0.59    | 0.30   | 0.74   | 6.01  | 3.12E-04 | 1.04  | 6.16E-01 | 0.48  | 9.25E-01 | EGA2-1 |
| ENSMMUG00000039855 |              |                                                                              | 7.82   | 33.12   | 48.08  | 32.44  | 2.20  | 5.23E-07 | 0.65  | 2.08E-01 | -0.88 | 2.12E-01 | EGA2-1 |

|                     |              |                                                            |        |         |         |        |      |          |       |          |       |          |        |
|---------------------|--------------|------------------------------------------------------------|--------|---------|---------|--------|------|----------|-------|----------|-------|----------|--------|
| ENSMMUG00000029973  | LOC709583    | 60S Acidic Ribosomal Protein P1 Pseudogene                 | 24.99  | 62.72   | 163.04  | 99.46  | 1.62 | 1.97E-03 | 1.04  | 5.99E-02 | -0.71 | 4.41E-01 | EGA2-1 |
| ENSMMUG00000017057  | HOMER1       | Homer Scaffolding Protein 1                                | 12.84  | 65.34   | 30.01   | 4.60   | 1.93 | 4.11E-02 | -0.93 | 3.78E-01 | -2.19 | 7.29E-02 | EGA2-1 |
| ENSMMUG00000003578  | LOC693947    | Ribosomal Protein S23-like                                 | 25.09  | 83.81   | 113.59  | 86.85  | 1.54 | 4.48E-06 | 0.61  | 1.08E-01 | -0.39 | 5.59E-01 | EGA2-1 |
| ENSMMUG00000018999  | LOC106998833 | Peptidyl-prolyl Cis-trans Isomerase A Pseudogene           | 51.62  | 283.75  | 471.91  | 473.72 | 2.73 | 3.68E-05 | 0.69  | 3.97E-01 | 0.92  | 4.43E-01 | EGA2-1 |
| ENSMMUG00000043019  |              |                                                            | 3.56   | 82.74   | 15.89   | 42.79  | 3.98 | 8.12E-04 | -1.39 | 3.19E-01 | 0.68  | 8.20E-01 | EGA2-1 |
| ENSMMUG00000039795  |              |                                                            | 0.01   | 6.15    | 0.13    | 0.01   | 9.04 | 1.47E-02 | -6.84 | 7.09E-02 | -0.71 | 9.58E-01 | EGA2-1 |
| ENSMMUG00000029931  |              |                                                            | 178.11 | 820.35  | 1095.25 | #####  | 2.16 | 1.13E-06 | 0.67  | 2.03E-01 | -0.19 | 8.86E-01 | EGA2-1 |
| ENSMMUG00000018813  |              |                                                            | 48.81  | 118.82  | 116.28  | 101.80 | 1.06 | 1.20E-02 | -0.03 | 9.62E-01 | -0.03 | 9.82E-01 | EGA2-1 |
| ENSMMUG00000007773  | SLCO4C1      | Solute Carrier Organic Anion Transporter Family Member 4C1 | 0.32   | 22.93   | 48.94   | 54.08  | 7.52 | 1.45E-22 | 1.36  | 1.41E-01 | -0.14 | 9.64E-01 | EGA2-1 |
| ENSMMUG00000029880  | LOC704012    | 60S Ribosomal Protein L23a Pseudogene                      | 177.49 | 765.33  | 574.85  | 490.73 | 2.11 | 1.08E-08 | -0.26 | 6.05E-01 | -0.25 | 7.99E-01 | EGA2-1 |
| ENSMMUG00000046285  |              |                                                            | 3.48   | 19.79   | 19.90   | 16.01  | 2.52 | 5.71E-06 | 0.08  | 9.34E-01 | -0.33 | 8.15E-01 | EGA2-1 |
| ENSMMUG00000004670  | WDR36        | WD Repeat Domain 36                                        | 0.98   | 10.93   | 17.68   | 8.05   | 2.82 | 1.31E-03 | 1.20  | 2.27E-01 | -0.89 | 6.17E-01 | EGA2-1 |
| ENSMMUG00000046617  | LOC695949    | 39S Ribosomal Protein L49, Mitochondrial-like              | 0.55   | 15.80   | 7.07    | 6.72   | 4.55 | 3.91E-11 | -0.78 | 3.75E-01 | 0.18  | 9.44E-01 | EGA2-1 |
| ENSMMUG00000029932  |              |                                                            | 45.31  | 203.43  | 252.07  | 281.13 | 2.18 | 3.15E-08 | 0.43  | 3.95E-01 | -0.10 | 9.44E-01 | EGA2-1 |
| ENSMMUG00000046228  | LOC702864    | Prothymosin Alpha-like                                     | 178.81 | 1459.63 | 890.53  | 632.27 | 2.67 | 3.27E-07 | -0.51 | 4.45E-01 | -0.30 | 8.31E-01 | EGA2-1 |
| ENSMMUG00000045704  |              |                                                            | 6.35   | 21.21   | 16.19   | 15.82  | 1.54 | 1.37E-03 | 0.00  | 9.96E-01 | -0.14 | 9.31E-01 | EGA2-1 |
| ENSMMUG00000004417  | SAR1B        | Secretion Associated Ras Related GTPase 1B                 | 1.98   | 14.51   | 9.24    | 7.53   | 2.31 | 3.86E-02 | -0.32 | 8.36E-01 | 0.83  | 7.27E-01 | EGA2-1 |
| ENSMMUG00000012463  | DDX46        | DEAD-box Helicase 46                                       | 43.67  | 128.54  | 115.08  | 75.85  | 1.18 | 4.90E-03 | 0.02  | 9.73E-01 | -0.46 | 5.57E-01 | EGA2-1 |
| ENSMMUG00000004013  | C6H5orf24    | Chromosome 6 Open Reading Frame, Human C5orf24             | 0.50   | 8.46    | 4.47    | 5.03   | 4.73 | 8.67E-06 | -0.95 | 4.81E-01 | 0.15  | 9.70E-01 | EGA2-1 |
| ENSMMUG00000001515  | CDC23        | Cell Division Cycle 23                                     | 0.50   | 10.45   | 7.30    | 10.52  | 3.92 | 9.53E-05 | -0.13 | 9.37E-01 | 0.91  | 6.79E-01 | EGA2-1 |
| ENSMMUG00000000455  | KDM3B        | Lysine Demethylase 3B                                      | 1.16   | 5.34    | 8.13    | 19.76  | 2.51 | 1.91E-03 | 0.63  | 5.35E-01 | 0.99  | 5.03E-01 | EGA2-1 |
| ENSMMUG000000005871 | ETF1         | Eukaryotic Translation Termination Factor 1                | 25.29  | 93.52   | 108.47  | 76.78  | 1.59 | 1.91E-02 | 0.45  | 5.89E-01 | -0.79 | 5.13E-01 | EGA2-1 |
| ENSMMUG00000016741  | MATR3        | Matrin 3                                                   | 2.40   | 46.90   | 58.82   | 41.48  | 4.11 | 1.62E-22 | 0.65  | 2.15E-01 | -0.37 | 7.27E-01 | EGA2-1 |
| ENSMMUG00000019582  | LOC698045    | Ankyrin Repeat And KH Domain-containing Protein 1          | 2.01   | 9.19    | 13.44   | 13.26  | 2.16 | 5.10E-04 | 0.76  | 2.95E-01 | 0.10  | 9.67E-01 | EGA2-1 |
| ENSMMUG00000010007  | CD14         | CD14 Molecule                                              | 0.08   | 1.74    | 1.71    | 0.21   | 5.21 | 1.55E-04 | -2.21 | 1.51E-01 | -0.59 | 8.81E-01 | EGA2-1 |
| ENSMMUG00000018246  | TMCO6        | Transmembrane And Coiled-coil Domains 6                    | 0.22   | 6.65    | 1.78    | 4.27   | 4.00 | 1.25E-03 | -2.00 | 1.40E-01 | 1.77  | 4.08E-01 | EGA2-1 |
| ENSMMUG00000010008  | IK           | IK Cytokine                                                | 45.63  | 106.71  | 105.26  | 66.53  | 1.10 | 3.18E-02 | 0.07  | 9.26E-01 | -0.24 | 8.51E-01 | EGA2-1 |
| ENSMMUG00000004480  | DND1         | DND MicroRNA-mediated Repression Inhibitor 1               | 2.38   | 13.61   | 10.36   | 7.58   | 2.28 | 2.46E-02 | -0.25 | 8.64E-01 | -0.13 | 9.72E-01 | EGA2-1 |
| ENSMMUG00000007073  |              |                                                            | 22.50  | 97.74   | 88.38   | 70.62  | 2.10 | 5.66E-08 | 0.06  | 9.23E-01 | -0.40 | 6.37E-01 | EGA2-1 |
| ENSMMUG00000021964  | DIAPH1       | Diaphanous Related Formin 1                                | 3.56   | 14.16   | 21.04   | 19.27  | 1.80 | 2.80E-02 | 0.96  | 2.84E-01 | 0.13  | 9.64E-01 | EGA2-1 |
| ENSMMUG00000047451  |              |                                                            | 44.08  | 101.55  | 100.43  | 110.17 | 1.06 | 7.93E-03 | 0.10  | 8.67E-01 | -0.30 | 7.37E-01 | EGA2-1 |
| ENSMMUG00000021660  | AFAP1L1      | Actin Filament Associated Protein 1 Like 1                 | 0.01   | 0.69    | 1.91    | 2.51   | 6.46 | 2.97E-05 | 1.19  | 5.02E-01 | -0.86 | 8.12E-01 | EGA2-1 |
| ENSMMUG00000001758  | CSNK1A1      | Casein Kinase 1 Alpha 1                                    | 14.00  | 33.30   | 33.34   | 40.82  | 1.14 | 7.88E-04 | -0.04 | 9.48E-01 | 0.28  | 7.19E-01 | EGA2-1 |
| ENSMMUG00000017714  | ARHGEF37     | Rho Guanine Nucleotide Exchange Factor 37                  | 0.00   | 0.39    | 1.86    | 0.48   | 6.45 | 1.26E-05 | 2.43  | 9.65E-02 | -1.03 | 7.47E-01 | EGA2-1 |
| ENSMMUG00000004749  | PPARGC1B     | PPARG Coactivator 1 Beta                                   | 0.18   | 2.77    | 3.89    | 2.86   | 3.70 | 5.58E-04 | 1.28  | 3.06E-01 | -1.36 | 4.89E-01 | EGA2-1 |
| ENSMMUG00000029776  | SLC26A2      | Solute Carrier Family 26 Member 2                          | 0.56   | 7.41    | 11.72   | 8.17   | 4.52 | 1.81E-06 | 1.23  | 2.80E-01 | -1.60 | 3.19E-01 | EGA2-1 |
| ENSMMUG00000002848  | RPS14        | Ribosomal Protein S14                                      | 4.89   | 22.42   | 28.79   | 27.95  | 2.46 | 2.92E-04 | -0.13 | 9.04E-01 | -0.03 | 9.92E-01 | EGA2-1 |
| ENSMMUG000000005414 | NDST1        | N-deacetylase And N-sulfotransferase 1                     | 1.41   | 7.06    | 1.89    | 2.70   | 1.96 | 4.01E-02 | -1.63 | 9.27E-02 | 0.51  | 8.19E-01 | EGA2-1 |
| ENSMMUG00000014701  | G3BP1        | G3BP Stress Granule Assembly Factor 1                      | 4.07   | 22.21   | 19.90   | 30.04  | 1.87 | 2.10E-02 | -0.21 | 8.51E-01 | 0.38  | 8.51E-01 | EGA2-1 |
| ENSMMUG00000014704  | GLRA1        | Glycine Receptor Alpha 1                                   | 0.02   | 0.73    | 0.20    | 1.26   | 5.58 | 1.47E-02 | 0.82  | 7.71E-01 | 3.31  | 3.19E-01 | EGA2-1 |

|                    |              |                                                     |        |         |         |        |      |          |       |          |       |          |        |
|--------------------|--------------|-----------------------------------------------------|--------|---------|---------|--------|------|----------|-------|----------|-------|----------|--------|
| ENSMMUG00000029761 | LOC714001    | Histone H2B Type 1-K-like                           | 72.37  | 168.03  | 105.39  | 74.46  | 1.26 | 4.83E-02 | -1.04 | 1.07E-01 | -0.56 | 6.49E-01 | EGA2-1 |
| ENSMMUG00000009108 |              |                                                     | 3.87   | 19.52   | 36.49   | 62.66  | 3.51 | 5.60E-04 | 0.49  | 7.28E-01 | 0.67  | 7.85E-01 | EGA2-1 |
| ENSMMUG00000011472 | PWWP2A       | PWWP Domain Containing 2A                           | 1.18   | 9.30    | 9.27    | 8.54   | 2.86 | 5.99E-03 | -0.18 | 9.08E-01 | 1.07  | 5.95E-01 | EGA2-1 |
| ENSMMUG00000029285 |              |                                                     | 10.07  | 59.36   | 56.14   | 45.79  | 2.62 | 3.53E-03 | -1.18 | 2.43E-01 | -0.39 | 8.73E-01 | EGA2-1 |
| ENSMMUG00000029730 | RPL29        | Ribosomal Protein L29                               | 11.11  | 60.53   | 94.75   | 63.24  | 2.64 | 6.14E-06 | 0.74  | 2.92E-01 | -1.10 | 2.41E-01 | EGA2-1 |
| ENSMMUG00000015781 | NPM1         | Nucleophosmin 1                                     | 907.40 | 2469.59 | 2334.12 | #####  | 1.34 | 6.79E-06 | -0.11 | 8.02E-01 | -0.48 | 3.55E-01 | EGA2-1 |
| ENSMMUG00000045352 | FGF18        | Fibroblast Growth Factor 18                         | 0.01   | 2.48    | 0.79    | 3.84   | 9.10 | 5.86E-04 | -0.52 | 8.92E-01 | 4.47  | 2.62E-01 | EGA2-1 |
| ENSMMUG00000016008 | FBXW11       | F-box And WD Repeat Domain Containing 11            | 2.51   | 13.10   | 7.88    | 5.98   | 2.10 | 1.26E-03 | -0.59 | 4.58E-01 | -0.92 | 4.21E-01 | EGA2-1 |
| ENSMMUG00000005909 | CREBRF       | CREB3 Regulatory Factor                             | 1.17   | 7.93    | 7.09    | 5.96   | 2.95 | 2.45E-04 | -0.69 | 4.94E-01 | 0.01  | 9.98E-01 | EGA2-1 |
| ENSMMUG00000019715 | ARL10        | ADP Ribosylation Factor Like GTPase 10              | 0.20   | 8.53    | 3.20    | 2.52   | 4.88 | 6.73E-06 | -1.91 | 1.17E-01 | 1.18  | 5.98E-01 | EGA2-1 |
| ENSMMUG00000009317 |              |                                                     | 11.74  | 108.29  | 68.66   | 54.90  | 3.21 | 1.76E-04 | -0.56 | 6.22E-01 | -0.36 | 8.83E-01 | EGA2-1 |
| ENSMMUG00000009059 | FAF2         | Fas Associated Factor Family Member 2               | 1.70   | 8.49    | 14.12   | 10.48  | 1.99 | 1.39E-02 | 1.01  | 2.57E-01 | -0.42 | 8.32E-01 | EGA2-1 |
| ENSMMUG00000013282 | RNF44        | Ring Finger Protein 44                              | 2.95   | 8.82    | 8.94    | 7.24   | 1.73 | 3.64E-02 | -0.56 | 5.74E-01 | 0.05  | 9.87E-01 | EGA2-1 |
| ENSMMUG00000045543 |              |                                                     | 0.08   | 0.83    | 0.67    | 0.48   | 4.03 | 3.40E-02 | -2.59 | 1.89E-01 | 2.24  | 4.88E-01 | EGA2-1 |
| ENSMMUG00000009045 | RAB24        | RAB24, Member RAS Oncogene Family                   | 0.20   | 4.36    | 2.34    | 1.97   | 3.71 | 5.69E-03 | -1.03 | 5.32E-01 | -1.10 | 7.00E-01 | EGA2-1 |
| ENSMMUG00000016911 | DDX41        | DEAD-box Helicase 41                                | 0.65   | 5.71    | 3.96    | 5.62   | 3.22 | 2.28E-04 | -0.59 | 6.10E-01 | 1.03  | 5.36E-01 | EGA2-1 |
| ENSMMUG00000016910 | FAM193B      | Family With Sequence Similarity 193 Member B        | 0.13   | 1.78    | 2.55    | 1.53   | 3.64 | 1.71E-04 | -0.06 | 9.70E-01 | -0.46 | 8.62E-01 | EGA2-1 |
| ENSMMUG00000018757 |              |                                                     | 3.07   | 58.80   | 20.67   | 18.41  | 4.37 | 1.58E-05 | -1.72 | 1.31E-01 | -0.30 | 9.30E-01 | EGA2-1 |
| ENSMMUG00000003996 | HNRNPAB      | Heterogeneous Nuclear Ribonucleoprotein A/B         | 3.85   | 161.95  | 138.29  | 132.15 | 5.40 | 1.05E-17 | -0.22 | 8.30E-01 | 0.52  | 7.44E-01 | EGA2-1 |
| ENSMMUG00000008978 | ZFP2         | ZFP2 Zinc Finger Protein                            | 0.12   | 1.80    | 1.76    | 0.64   | 4.20 | 3.29E-04 | 0.62  | 6.95E-01 | -2.05 | 2.68E-01 | EGA2-1 |
| ENSMMUG00000010843 | HNRNPH1      | Heterogeneous Nuclear Ribonucleoprotein H1          | 17.67  | 231.00  | 120.00  | 116.24 | 3.59 | 6.87E-09 | -0.90 | 2.29E-01 | 0.04  | 9.86E-01 | EGA2-1 |
| ENSMMUG00000012371 | MAML1        | Mastermind Like Transcriptional Coactivator 1       | 2.48   | 8.41    | 9.76    | 10.24  | 2.50 | 6.29E-04 | 0.19  | 8.59E-01 | -0.21 | 9.31E-01 | EGA2-1 |
| ENSMMUG00000048053 |              |                                                     | 0.21   | 6.40    | 1.29    | 4.44   | 4.35 | 1.82E-03 | -1.42 | 3.49E-01 | 3.34  | 7.44E-02 | EGA2-1 |
| ENSMMUG00000003604 | RACK1        | Receptor For Activated C Kinase 1                   | 14.62  | 73.19   | 108.52  | 133.98 | 2.33 | 3.26E-06 | 0.71  | 2.35E-01 | 0.01  | 9.97E-01 | EGA2-1 |
| ENSMMUG00000007598 | TRIM52       | Tripartite Motif Containing 52                      | 0.50   | 9.38    | 10.69   | 2.59   | 4.06 | 6.84E-03 | -0.68 | 7.39E-01 | -0.65 | 8.73E-01 | EGA2-1 |
| ENSMMUG00000001210 |              |                                                     | 137.61 | 513.90  | 602.87  | 564.79 | 2.12 | 4.66E-24 | 0.20  | 4.87E-01 | -0.41 | 2.50E-01 | EGA2-1 |
| ENSMMUG00000023785 | LOC708415    | Tubulin Beta-2B Chain                               | 1.25   | 11.18   | 30.40   | 17.65  | 2.62 | 8.75E-04 | 1.59  | 5.72E-02 | -0.73 | 6.61E-01 | EGA2-1 |
| ENSMMUG00000045990 | LOC100428069 | 40S Ribosomal Protein S27-like                      | 5.53   | 30.49   | 45.85   | 44.36  | 2.53 | 2.73E-08 | 0.57  | 3.06E-01 | 0.19  | 8.94E-01 | EGA2-1 |
| ENSMMUG00000014017 | PRPF4B       | Pre-mRNA Processing Factor 4B                       | 5.24   | 65.93   | 75.95   | 60.06  | 3.41 | 2.41E-10 | 0.65  | 3.41E-01 | -0.71 | 5.03E-01 | EGA2-1 |
| ENSMMUG00000001925 |              |                                                     | 36.64  | 186.62  | 151.76  | 106.20 | 2.36 | 1.56E-05 | -0.46 | 5.15E-01 | -0.24 | 8.80E-01 | EGA2-1 |
| ENSMMUG00000007852 | RREB1        | Ras Responsive Element Binding Protein 1            | 2.69   | 21.46   | 24.86   | 23.37  | 3.14 | 1.21E-16 | 0.08  | 8.94E-01 | 0.25  | 8.04E-01 | EGA2-1 |
| ENSMMUG00000046204 |              |                                                     | 5.09   | 15.88   | 20.49   | 23.82  | 2.07 | 9.67E-04 | -0.02 | 9.86E-01 | 0.66  | 5.96E-01 | EGA2-1 |
| ENSMMUG00000029997 |              |                                                     | 9.65   | 48.83   | 72.41   | 75.05  | 2.66 | 6.97E-04 | 0.56  | 5.78E-01 | 0.73  | 6.54E-01 | EGA2-1 |
| ENSMMUG00000010672 | SLC35B3      | Solute Carrier Family 35 Member B3                  | 0.38   | 7.17    | 5.86    | 4.35   | 4.28 | 8.79E-07 | 0.56  | 6.36E-01 | 1.19  | 4.62E-01 | EGA2-1 |
| ENSMMUG00000006186 | TFAP2A       | Transcription Factor AP-2 Alpha                     | 0.12   | 1.70    | 1.34    | 3.15   | 4.23 | 1.30E-03 | -1.86 | 2.08E-01 | 3.16  | 8.03E-02 | EGA2-1 |
| ENSMMUG00000004347 | ADTRP        | Androgen Dependent TFPI Regulating Protein          | 0.16   | 4.53    | 8.05    | 9.70   | 4.52 | 9.94E-11 | 0.42  | 6.71E-01 | 0.59  | 7.23E-01 | EGA2-1 |
| ENSMMUG00000005407 | GFOD1        | Glucose-fructose Oxidoreductase Domain Containing 1 | 0.00   | 0.28    | 0.22    | 0.57   | 6.69 | 1.90E-02 | -2.96 | 3.43E-01 | 3.38  | 4.76E-01 | EGA2-1 |
| ENSMMUG00000029978 |              |                                                     | 3.07   | 22.77   | 22.92   | 34.72  | 2.90 | 6.21E-05 | 0.15  | 8.93E-01 | 0.27  | 9.01E-01 | EGA2-1 |
| ENSMMUG00000029940 |              |                                                     | 20.20  | 49.07   | 55.37   | 63.94  | 1.21 | 6.68E-03 | 0.33  | 5.54E-01 | -0.30 | 7.75E-01 | EGA2-1 |
| ENSMMUG00000002682 | C4H6orf62    | Chromosome 4 Open Reading Frame, Human C6orf62      | 15.19  | 28.50   | 53.34   | 38.99  | 1.06 | 1.40E-02 | 0.76  | 8.73E-02 | -0.39 | 6.47E-01 | EGA2-1 |
| ENSMMUG00000038737 | HIST1H2BA    | Histone Cluster 1, H2ba                             | 22.35  | 78.45   | 101.29  | 28.41  | 3.57 | 1.08E-04 | -1.18 | 2.77E-01 | -1.55 | 3.19E-01 | EGA2-1 |

|                    |              |                                                  |        |        |        |        |      |          |       |          |       |          |        |
|--------------------|--------------|--------------------------------------------------|--------|--------|--------|--------|------|----------|-------|----------|-------|----------|--------|
| ENSMMUG00000042224 | LOC695427    | Histone H3.1                                     | 26.24  | 287.84 | 299.42 | 271.80 | 3.22 | 2.71E-05 | -0.45 | 6.69E-01 | 0.18  | 9.50E-01 | EGA2-1 |
| ENSMMUG00000043203 | HIST1H2AE    | Histone Cluster 1, H2ae                          | 23.88  | 87.75  | 129.03 | 89.55  | 1.82 | 3.64E-02 | -0.21 | 8.63E-01 | 0.00  | 9.99E-01 | EGA2-1 |
| ENSMMUG00000046231 | LOC696506    | Histone H2B Type 1                               | 4.81   | 36.42  | 42.68  | 48.04  | 2.63 | 6.17E-03 | 0.02  | 9.89E-01 | 0.07  | 9.84E-01 | EGA2-1 |
| ENSMMUG00000037912 |              |                                                  | 8.81   | 71.11  | 81.52  | 78.07  | 3.26 | 7.35E-03 | -0.72 | 6.45E-01 | 0.45  | 8.95E-01 | EGA2-1 |
| ENSMMUG00000048107 | LOC106996634 | Histone H4-like                                  | 1.69   | 77.42  | 136.49 | 113.82 | 5.18 | 3.17E-06 | 0.86  | 5.50E-01 | 0.29  | 9.40E-01 | EGA2-1 |
| ENSMMUG00000039700 | HIST1H2AC    | Histone Cluster 1, H2ac                          | 15.67  | 115.43 | 100.04 | 69.80  | 2.93 | 3.90E-09 | -0.41 | 5.41E-01 | -0.48 | 6.73E-01 | EGA2-1 |
| ENSMMUG00000041727 | LOC106997853 | Histone H2B Type 1-M-like                        | 0.87   | 5.99   | 4.64   | 6.71   | 2.48 | 3.42E-03 | -0.29 | 8.13E-01 | 0.78  | 6.53E-01 | EGA2-1 |
| ENSMMUG00000048883 | LOC696808    | Histone H2B Type 1                               | 3.24   | 155.08 | 163.85 | 98.57  | 7.36 | 1.72E-12 | -0.08 | 9.64E-01 | -0.44 | 8.91E-01 | EGA2-1 |
| ENSMMUG00000048625 | LOC697115    | Histone H4                                       | 0.50   | 13.35  | 42.65  | 98.01  | 3.11 | 4.30E-02 | 2.19  | 1.11E-01 | 2.44  | 2.15E-01 | EGA2-1 |
| ENSMMUG00000041744 |              |                                                  | 0.95   | 51.73  | 51.85  | 61.18  | 6.44 | 4.28E-10 | -0.15 | 9.27E-01 | -1.09 | 6.02E-01 | EGA2-1 |
| ENSMMUG00000048370 | LOC696808    | Histone H2B Type 1                               | 1.08   | 53.92  | 99.39  | 102.97 | 6.11 | 3.43E-06 | 0.63  | 7.37E-01 | 0.41  | 9.20E-01 | EGA2-1 |
| ENSMMUG00000045838 | HIST1H2AD    | Histone Cluster 1, H2ad                          | 2.22   | 51.35  | 82.33  | 79.43  | 3.73 | 5.22E-05 | 0.78  | 5.07E-01 | 0.33  | 9.05E-01 | EGA2-1 |
| ENSMMUG00000040447 | LOC698105    | Histone H3.1                                     | 0.18   | 32.91  | 20.86  | 31.39  | 8.62 | 7.85E-11 | -1.68 | 2.46E-01 | 0.12  | 9.80E-01 | EGA2-1 |
| ENSMMUG00000045171 | LOC698354    | Histone H4                                       | 1.02   | 138.69 | 171.44 | 224.73 | 8.45 | 5.14E-07 | -1.22 | 5.68E-01 | 0.76  | 8.70E-01 | EGA2-1 |
| ENSMMUG00000048028 |              |                                                  | 0.31   | 54.82  | 53.22  | 90.17  | 6.19 | 1.97E-05 | 0.89  | 6.26E-01 | 0.18  | 9.73E-01 | EGA2-1 |
| ENSMMUG00000045038 | HIST1H2BH    | Histone Cluster 1, H2bh                          | 0.10   | 21.55  | 14.35  | 11.45  | 8.06 | 2.19E-14 | -0.53 | 7.13E-01 | 1.35  | 4.95E-01 | EGA2-1 |
| ENSMMUG00000043826 |              |                                                  | 36.04  | 214.94 | 246.74 | 145.82 | 2.36 | 4.65E-03 | -0.25 | 8.37E-01 | -0.62 | 7.39E-01 | EGA2-1 |
| ENSMMUG00000047819 | LOC699110    | Histone H4                                       | 16.76  | 67.41  | 63.36  | 39.16  | 2.24 | 2.20E-02 | -0.26 | 8.51E-01 | -2.06 | 1.24E-01 | EGA2-1 |
| ENSMMUG00000020417 |              |                                                  | 26.19  | 118.65 | 168.32 | 172.17 | 2.18 | 1.05E-06 | 0.41  | 4.72E-01 | 0.04  | 9.85E-01 | EGA2-1 |
| ENSMMUG00000006914 | ABT1         | Activator Of Basal Transcription 1               | 0.23   | 12.50  | 6.85   | 5.83   | 5.26 | 9.65E-05 | -1.09 | 5.23E-01 | 1.16  | 6.96E-01 | EGA2-1 |
| ENSMMUG00000041377 | HIST1H2BK    | Histone Cluster 1, H2bk                          | 135.11 | 357.14 | 198.38 | 136.85 | 1.40 | 3.17E-02 | -1.19 | 6.97E-02 | -0.61 | 6.29E-01 | EGA2-1 |
| ENSMMUG00000023683 |              |                                                  | 0.09   | 0.59   | 0.73   | 0.63   | 2.53 | 4.28E-02 | 0.08  | 9.64E-01 | 0.12  | 9.78E-01 | EGA2-1 |
| ENSMMUG00000042667 |              |                                                  | 0.52   | 7.76   | 2.48   | 4.69   | 4.32 | 2.72E-03 | -1.49 | 3.66E-01 | 2.44  | 3.00E-01 | EGA2-1 |
| ENSMMUG00000040850 |              |                                                  | 0.94   | 13.06  | 5.37   | 4.99   | 4.59 | 2.25E-02 | -1.55 | 5.09E-01 | 0.98  | 8.42E-01 | EGA2-1 |
| ENSMMUG00000042816 | LOC704241    | Histone H2B Type 1-F/J/L                         | 0.58   | 15.76  | 24.88  | 23.06  | 4.41 | 6.88E-08 | 0.08  | 9.56E-01 | 0.19  | 9.51E-01 | EGA2-1 |
| ENSMMUG00000042665 | HIST1H2AD    | Histone Cluster 1, H2ad                          | 0.01   | 2.35   | 4.66   | 2.50   | 7.46 | 2.51E-04 | 0.08  | 9.79E-01 | -0.16 | 9.82E-01 | EGA2-1 |
| ENSMMUG00000046125 | LOC703889    | Histone H3.1                                     | 0.13   | 31.33  | 50.08  | 86.84  | 9.49 | 6.76E-11 | 0.63  | 7.50E-01 | -0.71 | 8.53E-01 | EGA2-1 |
| ENSMMUG00000046727 | HIST1H2AJ    | Histone Cluster 1, H2aj                          | 0.34   | 63.53  | 129.49 | 116.57 | 6.59 | 1.71E-14 | 1.65  | 8.31E-02 | -0.53 | 8.11E-01 | EGA2-1 |
| ENSMMUG00000037560 | LOC705220    | Histone H3.1t-like                               | 1.81   | 47.14  | 50.67  | 75.89  | 4.47 | 8.48E-06 | 0.77  | 5.54E-01 | -0.29 | 9.32E-01 | EGA2-1 |
| ENSMMUG00000043231 | HIST1H2AD    | Histone Cluster 1, H2ad                          | 6.91   | 67.53  | 91.78  | 38.96  | 3.65 | 3.96E-05 | -0.15 | 9.18E-01 | -1.48 | 3.20E-01 | EGA2-1 |
| ENSMMUG00000038041 |              |                                                  | 12.29  | 47.74  | 40.32  | 34.08  | 1.90 | 3.27E-02 | -0.82 | 4.23E-01 | -1.11 | 4.63E-01 | EGA2-1 |
| ENSMMUG00000047851 | LOC704994    | Histone H2A Type 1-H-like                        | 0.24   | 53.31  | 99.77  | 87.98  | 7.72 | 5.38E-12 | 1.05  | 4.36E-01 | -0.31 | 9.31E-01 | EGA2-1 |
| ENSMMUG00000048243 | LOC100430668 | Histone H3.1-like                                | 0.12   | 32.65  | 32.79  | 38.88  | 7.90 | 2.60E-09 | 0.75  | 6.71E-01 | 0.29  | 9.50E-01 | EGA2-1 |
| ENSMMUG00000043751 | HIST1H2AD    | Histone Cluster 1, H2ad                          | 0.13   | 52.51  | 68.03  | 48.44  | 8.66 | 1.46E-20 | 0.32  | 7.96E-01 | 0.02  | 9.95E-01 | EGA2-1 |
| ENSMMUG00000046025 | HIST1H2BO    | Histone Cluster 1, H2bo                          | 1.80   | 82.01  | 77.76  | 67.36  | 4.15 | 1.00E-05 | -0.03 | 9.85E-01 | -0.98 | 6.21E-01 | EGA2-1 |
| ENSMMUG00000003331 | ZSCAN16      | Zinc Finger And SCAN Domain Containing 16        | 0.12   | 2.25   | 1.08   | 1.97   | 4.89 | 5.72E-04 | -1.35 | 4.35E-01 | 0.71  | 8.50E-01 | EGA2-1 |
| ENSMMUG00000003332 | LOC706188    | Zinc Finger Protein With KRAB And SCAN Domains 8 | 0.34   | 4.23   | 3.69   | 4.30   | 2.87 | 1.69E-02 | 0.00  | 9.99E-01 | 2.17  | 2.17E-01 | EGA2-1 |
| ENSMMUG00000029892 |              |                                                  | 0.01   | 2.45   | 1.48   | 0.35   | 6.97 | 4.10E-02 | -1.74 | 6.74E-01 | 1.08  | 9.07E-01 | EGA2-1 |
| ENSMMUG00000011675 | ZSCAN12      | Zinc Finger And SCAN Domain Containing 12        | 0.03   | 0.42   | 0.28   | 1.12   | 6.78 | 1.71E-06 | -1.49 | 3.35E-01 | 2.90  | 1.31E-01 | EGA2-1 |
| ENSMMUG00000012396 | ZSCAN23      | Zinc Finger And SCAN Domain Containing 23        | 0.01   | 0.77   | 0.34   | 0.47   | 6.78 | 5.58E-05 | -0.63 | 7.79E-01 | 3.60  | 1.37E-01 | EGA2-1 |
| ENSMMUG00000008799 | MAMU-F       | Major Histocompatibility Complex, Class I, F     | 0.95   | 4.55   | 2.76   | 2.40   | 2.36 | 1.08E-02 | -0.21 | 8.75E-01 | -0.58 | 7.96E-01 | EGA2-1 |
| ENSMMUG00000044002 | MAMU-A       | Major Histocompatibility Complex, Class I, A     | 0.43   | 0.67   | 0.53   | 1.08   | 2.49 | 3.66E-02 | -1.66 | 1.89E-01 | 0.15  | 9.72E-01 | EGA2-1 |
| ENSMMUG00000011686 |              |                                                  | 0.30   | 2.78   | 1.49   | 2.56   | 3.21 | 1.34E-02 | -1.42 | 3.35E-01 | 0.17  | 9.71E-01 | EGA2-1 |
| ENSMMUG00000001886 | ABCF1        | ATP Binding Cassette Subfamily F Member 1        | 11.71  | 70.63  | 37.31  | 25.49  | 2.55 | 1.26E-06 | -1.04 | 7.78E-02 | 0.14  | 9.37E-01 | EGA2-1 |
| ENSMMUG00000006524 | PPP1R10      | Protein Phosphatase 1 Regulatory Subunit 10      | 32.40  | 71.12  | 49.39  | 32.30  | 1.19 | 4.06E-02 | -0.74 | 2.38E-01 | -0.43 | 7.30E-01 | EGA2-1 |
| ENSMMUG00000019960 | DHX16        | DEAH-box Helicase 16                             | 0.65   | 8.51   | 6.69   | 5.30   | 3.54 | 7.88E-08 | -0.60 | 4.83E-01 | 0.72  | 6.05E-01 | EGA2-1 |
| ENSMMUG00000030028 | TUBB         | Tubulin Beta Class I                             | 0.34   | 2.44   | 7.61   | 12.07  | 2.97 | 5.71E-03 | 1.71  | 1.22E-01 | 0.11  | 9.77E-01 | EGA2-1 |
| ENSMMUG00000018615 |              |                                                  | 0.07   | 2.70   | 1.50   | 0.28   | 6.61 | 2.61E-03 | -3.61 | 1.26E-01 | -2.28 | 6.02E-01 | EGA2-1 |
| ENSMMUG00000048806 |              |                                                  | 0.26   | 2.81   | 1.29   | 0.49   | 2.75 | 2.09E-02 | -0.64 | 6.75E-01 | -1.77 | 3.70E-01 | EGA2-1 |
| ENSMMUG00000045600 | MAMU-B       | MHC Class I Antigen                              | 0.19   | 2.17   | 1.77   | 0.68   | 2.86 | 4.69E-03 | 0.33  | 8.20E-01 | -2.01 | 1.74E-01 | EGA2-1 |

|                     |              |                                                                          |        |         |         |        |       |          |       |          |       |          |        |
|---------------------|--------------|--------------------------------------------------------------------------|--------|---------|---------|--------|-------|----------|-------|----------|-------|----------|--------|
| ENSMMUG00000029841  | LOC720351    | HLA Class I<br>Histocompatibility<br>Antigen, B-27 Alpha Chain<br>like   | 0.24   | 2.33    | 1.78    | 0.60   | 3.33  | 2.10E-02 | -0.69 | 7.13E-01 | -1.51 | 5.75E-01 | EGA2-1 |
| ENSMMUG00000005294  | CSNK2B       | Casein Kinase 2 Beta                                                     | 7.09   | 25.47   | 16.32   | 11.71  | 1.72  | 8.98E-05 | -0.55 | 2.92E-01 | -0.69 | 3.54E-01 | EGA2-1 |
| ENSMMUG00000006828  | VARS         | Valyl-tRNA Synthetase                                                    | 1.02   | 4.33    | 10.63   | 13.89  | 2.22  | 1.87E-02 | 1.06  | 3.13E-01 | 1.05  | 5.33E-01 | EGA2-1 |
| ENSMMUG00000006832  | LSM2         | LSM2 Homolog, U6 Small<br>Nuclear RNA And MRNA<br>Degradation Associated | 2.39   | 16.07   | 26.87   | 27.54  | 3.63  | 3.64E-05 | 0.66  | 5.60E-01 | -0.35 | 8.92E-01 | EGA2-1 |
| ENSMMUG00000000735  | NELFE        | Negative Elongation<br>Factor Complex Member<br>E                        | 3.02   | 19.49   | 9.17    | 6.83   | 2.13  | 1.32E-02 | -0.51 | 6.43E-01 | -0.91 | 5.74E-01 | EGA2-1 |
| ENSMMUG00000011306  |              |                                                                          | 0.16   | 3.76    | 0.41    | 0.49   | 4.49  | 1.63E-02 | -3.50 | 6.66E-02 | -1.04 | 8.18E-01 | EGA2-1 |
| ENSMMUG00000003867  | RPS18        | Ribosomal Protein S18                                                    | 43.55  | 227.36  | 335.69  | 368.46 | 2.59  | 3.01E-09 | 0.39  | 5.03E-01 | 0.07  | 9.69E-01 | EGA2-1 |
| ENSMMUG000000047020 |              |                                                                          | 0.00   | 1.55    | 2.94    | 0.98   | 20.72 | 6.68E-07 | 2.56  | 6.51E-01 | -1.87 | 8.76E-01 | EGA2-1 |
| ENSMMUG00000003871  | PFDN6        | Prefoldin Subunit 6                                                      | 5.29   | 32.99   | 20.59   | 15.13  | 2.43  | 5.07E-03 | -1.18 | 2.21E-01 | 0.15  | 9.64E-01 | EGA2-1 |
| ENSMMUG00000004287  | DAXX         | Death Domain Associated<br>Protein                                       | 10.20  | 28.62   | 17.11   | 19.34  | 1.27  | 4.84E-02 | -0.49 | 5.07E-01 | 0.10  | 9.65E-01 | EGA2-1 |
| ENSMMUG00000007477  | KIFC1        | Kinesin Family Member<br>C1                                              | 4.27   | 16.87   | 9.64    | 13.57  | 1.94  | 1.64E-03 | -1.09 | 9.98E-02 | 0.99  | 3.23E-01 | EGA2-1 |
| ENSMMUG00000009104  | BAK1         | BCL2 Antagonist/killer 1                                                 | 0.66   | 25.60   | 48.67   | 19.86  | 6.34  | 3.08E-07 | 0.71  | 6.82E-01 | -1.85 | 4.08E-01 | EGA2-1 |
| ENSMMUG00000019505  | EIF1         | Eukaryotic Translation<br>Initiation Factor 1                            | 71.18  | 331.25  | 232.55  | 75.40  | 2.26  | 6.77E-05 | -0.84 | 1.99E-01 | -1.26 | 1.38E-01 | EGA2-1 |
| ENSMMUG00000019529  | HMGA1        | High Mobility Group AT-<br>hook 1                                        | 60.75  | 336.76  | 560.17  | 415.42 | 2.54  | 1.84E-06 | 0.43  | 5.44E-01 | -0.37 | 7.80E-01 | EGA2-1 |
| ENSMMUG00000029987  |              |                                                                          | 323.07 | 1579.63 | 1590.01 | #####  | 1.91  | 9.33E-04 | 0.28  | 7.28E-01 | -0.70 | 5.12E-01 | EGA2-1 |
| ENSMMUG000000021715 | TAF11        | TATA-box Binding Protein<br>Associated Factor 11                         | 1.47   | 13.89   | 6.68    | 6.89   | 3.77  | 1.05E-04 | -0.66 | 6.08E-01 | 1.23  | 5.00E-01 | EGA2-1 |
| ENSMMUG00000014306  | SRSF3        | Serine And Arginine Rich<br>Splicing Factor 3                            | 3.36   | 81.54   | 82.24   | 80.04  | 4.60  | 1.05E-25 | 0.15  | 8.34E-01 | -0.17 | 9.03E-01 | EGA2-1 |
| ENSMMUG000000042101 |              |                                                                          | 0.12   | 2.48    | 1.68    | 1.83   | 6.34  | 7.26E-07 | -2.05 | 1.33E-01 | 1.44  | 5.54E-01 | EGA2-1 |
| ENSMMUG000000021976 | MTCH1        | Mitochondrial Carrier 1                                                  | 8.65   | 23.91   | 25.19   | 25.57  | 1.27  | 3.91E-02 | -0.22 | 7.87E-01 | 0.72  | 5.04E-01 | EGA2-1 |
| ENSMMUG000000021173 | NFYA         | Nuclear Transcription<br>Factor Y Subunit Alpha                          | 1.96   | 7.31    | 3.99    | 4.88   | 1.79  | 7.46E-03 | -0.80 | 2.91E-01 | 0.31  | 8.60E-01 | EGA2-1 |
| ENSMMUG000000043970 |              |                                                                          | 28.40  | 130.45  | 140.83  | 123.63 | 2.19  | 7.37E-03 | 0.12  | 9.24E-01 | -0.13 | 9.67E-01 | EGA2-1 |
| ENSMMUG000000021313 | RPL7L1       | Ribosomal Protein L7 Like<br>1                                           | 2.11   | 31.39   | 39.87   | 31.89  | 4.10  | 7.03E-07 | 0.28  | 8.24E-01 | -0.02 | 9.95E-01 | EGA2-1 |
| ENSMMUG000000042706 | CNPY3        | Canopy FGF Signaling<br>Regulator 3                                      | 0.77   | 4.49    | 0.78    | 1.12   | 2.29  | 4.87E-02 | -2.20 | 5.52E-02 | 1.52  | 4.26E-01 | EGA2-1 |
| ENSMMUG00000001393  | GNMT         | Glycine N-<br>methyltransferase                                          | 0.08   | 0.79    | 0.84    | 0.54   | 5.48  | 3.53E-02 | -1.98 | 5.00E-01 | 1.83  | 7.33E-01 | EGA2-1 |
| ENSMMUG000000016992 |              |                                                                          | 27.74  | 136.80  | 246.78  | 144.58 | 2.60  | 1.67E-11 | 0.72  | 1.07E-01 | -0.74 | 2.57E-01 | EGA2-1 |
| ENSMMUG00000015192  | POLR1C       | RNA Polymerase I Subunit<br>C                                            | 0.79   | 39.49   | 32.74   | 15.94  | 5.92  | 2.33E-15 | -0.35 | 7.58E-01 | -0.94 | 5.36E-01 | EGA2-1 |
| ENSMMUG00000015193  | XPO5         | Exportin 5                                                               | 5.51   | 23.49   | 24.24   | 19.36  | 1.94  | 2.15E-03 | -0.07 | 9.45E-01 | -0.25 | 8.93E-01 | EGA2-1 |
| ENSMMUG00000008890  | GTPBP2       | GTP Binding Protein 2                                                    | 0.92   | 11.60   | 5.00    | 6.24   | 2.96  | 1.36E-03 | -1.45 | 1.54E-01 | 0.01  | 9.99E-01 | EGA2-1 |
| ENSMMUG000000022686 | HSP90AB1     | Heat Shock Protein 90<br>Alpha Family Class B<br>Member 1                | 80.14  | 147.55  | 166.82  | 205.80 | 0.74  | 3.80E-02 | 0.15  | 7.45E-01 | 0.25  | 7.44E-01 | EGA2-1 |
| ENSMMUG00000006691  | IL17F        | Interleukin 17F                                                          | 0.01   | 2.88    | 2.43    | 2.07   | 6.84  | 7.80E-05 | 1.64  | 3.86E-01 | -2.21 | 4.38E-01 | EGA2-1 |
| ENSMMUG000000042564 |              |                                                                          | 0.00   | 7.07    | 0.34    | 0.36   | 24.77 | 5.70E-15 | -6.85 | 6.06E-02 | 5.46  | 3.42E-01 | EGA2-1 |
| ENSMMUG00000002777  | LOC694104    | Protein Tyrosine<br>Phosphatase Type IVA 1                               | 15.39  | 132.42  | 109.03  | 62.45  | 3.02  | 1.07E-13 | -0.09 | 8.90E-01 | -0.80 | 2.39E-01 | EGA2-1 |
| ENSMMUG00000017160  | PHF3         | PHD Finger Protein 3                                                     | 8.25   | 18.24   | 19.38   | 17.48  | 1.33  | 4.39E-04 | 0.23  | 6.56E-01 | -0.24 | 7.96E-01 | EGA2-1 |
| ENSMMUG00000015320  | KCNQ5        | Potassium Voltage-gated<br>Channel Subfamily Q<br>Member 5               | 0.06   | 2.12    | 0.45    | 0.49   | 4.54  | 1.06E-04 | -2.21 | 8.39E-02 | 0.56  | 8.60E-01 | EGA2-1 |
| ENSMMUG00000004852  | EEF1A2       | Eukaryotic Translation<br>Elongation Factor 1 Alpha<br>2                 | 290.54 | 1173.25 | 1468.06 | #####  | 2.18  | 1.26E-15 | 0.32  | 3.65E-01 | -0.46 | 3.44E-01 | EGA2-1 |
| ENSMMUG00000009233  | LOC716052    | Eukaryotic Translation<br>Initiation Factor 2<br>Subunit 3-like          | 0.63   | 4.41    | 7.05    | 7.22   | 2.60  | 7.84E-04 | 0.65  | 4.98E-01 | 0.09  | 9.74E-01 | EGA2-1 |
| ENSMMUG000000029549 | LOC106992390 | Cytochrome C                                                             | 24.04  | 105.31  | 140.47  | 85.97  | 2.14  | 1.03E-04 | 0.52  | 4.45E-01 | -0.40 | 7.61E-01 | EGA2-1 |



|                    |            |                                                                 |        |        |        |        |      |          |       |          |       |          |        |
|--------------------|------------|-----------------------------------------------------------------|--------|--------|--------|--------|------|----------|-------|----------|-------|----------|--------|
| ENSMMUG00000012575 | SYNCRIP    | Synaptotagmin Binding<br>Cytoplasmic RNA<br>Interacting Protein | 31.10  | 50.74  | 46.61  | 45.35  | 0.76 | 1.54E-02 | -0.12 | 7.89E-01 | 0.02  | 9.88E-01 | EGA2-1 |
| ENSMMUG00000041570 |            |                                                                 | 3.90   | 17.03  | 21.65  | 7.62   | 2.00 | 1.82E-02 | 0.62  | 5.47E-01 | -1.14 | 4.35E-01 | EGA2-1 |
| ENSMMUG0000000222  | CGA        | Glycoprotein Hormones,<br>Alpha Polypeptide                     | 0.04   | 2.79   | 0.19   | 0.00   | 7.95 | 7.95E-03 | -5.51 | 7.57E-02 | -1.81 | 8.04E-01 | EGA2-1 |
| ENSMMUG00000029541 |            |                                                                 | 6.44   | 80.24  | 16.15  | 6.54   | 2.61 | 2.47E-02 | -1.56 | 2.11E-01 | -1.92 | 2.70E-01 | EGA2-1 |
| ENSMMUG00000003464 | MDN1       | Midasin AAA ATPase 1                                            | 7.32   | 21.76  | 26.80  | 26.06  | 1.06 | 4.23E-02 | 0.59  | 3.01E-01 | -0.02 | 9.91E-01 | EGA2-1 |
| ENSMMUG00000009182 | CASP8AP2   | Caspase 8 Associated<br>Protein 2                               | 4.81   | 12.42  | 14.11  | 13.41  | 1.19 | 1.78E-02 | 0.54  | 3.36E-01 | -0.76 | 3.31E-01 | EGA2-1 |
| ENSMMUG00000004061 | CCNC       | Cyclin C                                                        | 0.56   | 4.88   | 16.84  | 11.62  | 3.08 | 2.32E-07 | 1.07  | 1.15E-01 | 0.22  | 9.05E-01 | EGA2-1 |
| ENSMMUG00000009861 | CNKSR3     | CNKSR Family Member 3                                           | 0.15   | 1.31   | 5.64   | 1.87   | 4.28 | 2.44E-04 | 2.23  | 7.56E-02 | -1.55 | 4.63E-01 | EGA2-1 |
| ENSMMUG00000020178 | MTRF1L     | Mitochondrial<br>Translational Release<br>Factor 1 Like         | 17.12  | 72.54  | 150.12 | 72.94  | 2.36 | 4.63E-05 | 0.70  | 3.10E-01 | -0.43 | 7.59E-01 | EGA2-1 |
| ENSMMUG00000000923 | LOC694341  | NKG2D Ligand 1-like                                             | 0.32   | 5.48   | 1.46   | 0.33   | 4.04 | 2.47E-02 | -2.53 | 1.94E-01 | -1.26 | 7.70E-01 | EGA2-1 |
| ENSMMUG00000009827 | LATS1      | Large Tumor Suppressor<br>Kinase 1                              | 0.51   | 4.45   | 8.04   | 2.62   | 3.52 | 5.48E-07 | 0.26  | 8.03E-01 | -0.45 | 8.06E-01 | EGA2-1 |
| ENSMMUG00000029458 |            |                                                                 | 31.50  | 185.56 | 247.18 | 251.88 | 2.47 | 5.30E-05 | 0.61  | 4.25E-01 | 0.07  | 9.76E-01 | EGA2-1 |
| ENSMMUG00000017082 | STXBP5     | Syntaxin Binding Protein<br>5                                   | 1.32   | 4.60   | 3.02   | 3.38   | 1.98 | 5.65E-04 | -1.06 | 9.01E-02 | 0.82  | 4.17E-01 | EGA2-1 |
| ENSMMUG00000047691 | SF3B5      | Splicing Factor 3b<br>Subunit 5                                 | 3.47   | 26.53  | 15.08  | 15.46  | 3.02 | 1.94E-02 | -2.12 | 1.16E-01 | 1.69  | 4.44E-01 | EGA2-1 |
| ENSMMUG00000040214 |            |                                                                 | 0.52   | 9.58   | 10.78  | 5.59   | 4.77 | 3.84E-03 | -1.39 | 4.80E-01 | 0.36  | 9.50E-01 | EGA2-1 |
| ENSMMUG00000017643 | CCDC28A    | Coiled-coil Domain<br>Containing 28A                            | 0.52   | 7.45   | 8.10   | 7.47   | 3.83 | 2.62E-03 | -0.33 | 8.56E-01 | -0.32 | 9.39E-01 | EGA2-1 |
| ENSMMUG00000003710 | BCLAF1     | BCL2 Associated<br>Transcription Factor 1                       | 12.02  | 60.38  | 70.95  | 54.34  | 2.27 | 3.12E-06 | 0.47  | 4.52E-01 | -0.30 | 8.12E-01 | EGA2-1 |
| ENSMMUG00000044284 | LOC706532  | 40S Ribosomal Protein<br>S11-like                               | 35.82  | 165.44 | 149.43 | 92.57  | 2.41 | 5.43E-05 | -0.22 | 8.03E-01 | -1.01 | 3.09E-01 | EGA2-1 |
| ENSMMUG00000008140 | SGK1       | Serum/glucocorticoid<br>Regulated Kinase 1                      | 2.23   | 20.79  | 26.12  | 13.02  | 3.41 | 1.73E-11 | 0.08  | 9.23E-01 | -0.71 | 4.70E-01 | EGA2-1 |
| ENSMMUG00000004166 |            |                                                                 | 1.54   | 8.34   | 11.88  | 14.59  | 2.22 | 2.15E-02 | 0.36  | 7.86E-01 | -0.24 | 9.37E-01 | EGA2-1 |
| ENSMMUG00000022184 | CEP85L     | Centrosomal Protein 85<br>Like                                  | 0.28   | 5.03   | 6.86   | 1.45   | 4.01 | 1.71E-05 | 0.53  | 6.81E-01 | -1.12 | 5.36E-01 | EGA2-1 |
| ENSMMUG00000045439 | PLN        | Phospholamban                                                   | 0.02   | 1.19   | 0.88   | 0.32   | 7.91 | 5.27E-06 | -0.18 | 9.44E-01 | -1.74 | 5.90E-01 | EGA2-1 |
| ENSMMUG00000008937 | HDAC2      | Histone Deacetylase 2                                           | 6.30   | 36.68  | 53.83  | 39.53  | 2.30 | 9.35E-04 | 0.70  | 4.04E-01 | -0.51 | 7.53E-01 | EGA2-1 |
| ENSMMUG00000001200 | LOC695715  | 60S Ribosomal Protein<br>L24 Pseudogene                         | 104.46 | 233.18 | 238.38 | 211.52 | 1.12 | 4.87E-03 | -0.03 | 9.68E-01 | -0.39 | 6.30E-01 | EGA2-1 |
| ENSMMUG00000020637 | CDK19      | Cyclin Dependent Kinase<br>19                                   | 1.38   | 3.51   | 3.27   | 4.67   | 1.72 | 1.01E-02 | -0.35 | 6.88E-01 | 0.71  | 5.74E-01 | EGA2-1 |
| ENSMMUG00000013373 |            |                                                                 | 197.25 | 526.71 | 462.78 | 278.71 | 1.26 | 8.02E-05 | -0.32 | 4.19E-01 | -0.46 | 4.28E-01 | EGA2-1 |
| ENSMMUG00000047404 |            |                                                                 | 22.46  | 108.78 | 128.25 | 98.85  | 2.25 | 9.98E-03 | 0.38  | 7.46E-01 | -0.33 | 8.93E-01 | EGA2-1 |
| ENSMMUG00000043752 | C4H6orf120 | Chromosome 4 Open<br>Reading Frame, Human<br>C6orf120           | 0.18   | 3.85   | 3.39   | 3.25   | 4.21 | 3.04E-06 | 0.68  | 5.66E-01 | -1.16 | 5.00E-01 | EGA2-1 |
| ENSMMUG00000019919 | PSMB1      | Proteasome Subunit Beta<br>1                                    | 12.45  | 24.15  | 35.90  | 41.14  | 1.08 | 3.91E-02 | 0.68  | 2.18E-01 | 0.25  | 8.45E-01 | EGA2-1 |
| ENSMMUG00000044763 |            |                                                                 | 12.75  | 63.98  | 83.11  | 87.82  | 2.25 | 5.03E-05 | -0.05 | 9.56E-01 | 0.45  | 7.29E-01 | EGA2-1 |
| ENSMMUG00000012276 | ARHGAP11A  | Rho GTPase Activating<br>Protein 11A                            | 10.14  | 30.83  | 39.31  | 32.89  | 1.67 | 1.35E-04 | 0.03  | 9.62E-01 | 0.11  | 9.46E-01 | EGA2-1 |
| ENSMMUG00000014227 | CHRM5      | Cholinergic Receptor<br>Muscarinic 5                            | 0.00   | 1.59   | 0.78   | 0.95   | 7.36 | 2.98E-05 | 0.18  | 9.47E-01 | -1.19 | 7.61E-01 | EGA2-1 |
| ENSMMUG00000012335 | EMC4       | ER Membrane Protein<br>Complex Subunit 4                        | 0.66   | 7.09   | 2.70   | 2.35   | 4.08 | 3.03E-03 | -1.83 | 2.34E-01 | -0.21 | 9.67E-01 | EGA2-1 |
| ENSMMUG00000046412 |            |                                                                 | 127.49 | 363.17 | 212.49 | 144.30 | 1.44 | 1.37E-02 | -0.76 | 2.37E-01 | -0.21 | 8.99E-01 | EGA2-1 |
| ENSMMUG00000006837 | C7H15orf41 | Chromosome 7 Open<br>Reading Frame, Human<br>C15orf41           | 5.91   | 26.52  | 18.82  | 4.65   | 2.18 | 3.71E-02 | -0.74 | 5.53E-01 | -1.78 | 2.46E-01 | EGA2-1 |
| ENSMMUG00000010704 | SPRED1     | Sprouty Related EVH1<br>Domain Containing 1                     | 0.46   | 2.22   | 2.70   | 4.18   | 2.87 | 4.69E-03 | -0.66 | 6.05E-01 | 1.45  | 3.97E-01 | EGA2-1 |
| ENSMMUG00000001482 | CCDC32     | Coiled-coil Domain<br>Containing 32                             | 0.16   | 8.86   | 4.59   | 2.33   | 6.23 | 1.33E-07 | -2.10 | 1.13E-01 | 0.23  | 9.60E-01 | EGA2-1 |

|                      |            |                                                                  |       |        |        |        |      |          |       |          |       |          |        |
|----------------------|------------|------------------------------------------------------------------|-------|--------|--------|--------|------|----------|-------|----------|-------|----------|--------|
| ENSMMUG00000001483   | RPUSD2     | RNA Pseudouridylate Synthase Domain Containing 2                 | 0.37  | 5.85   | 4.92   | 6.58   | 4.55 | 3.88E-07 | -0.85 | 4.56E-01 | 0.99  | 5.97E-01 | EGA2-1 |
| ENSMMUG00000001723   | ZFYVE19    | Zinc Finger FYVE-type Containing 19                              | 0.47  | 5.38   | 1.33   | 1.28   | 3.48 | 1.44E-03 | -2.16 | 6.19E-02 | 0.15  | 9.70E-01 | EGA2-1 |
| ENSMMUG000000040238  | CHP1       | Calcineurin Like EF-hand Protein 1                               | 27.92 | 61.01  | 77.69  | 72.86  | 1.23 | 1.13E-02 | 0.11  | 8.70E-01 | -0.18 | 8.93E-01 | EGA2-1 |
| ENSMMUG00000001544   | LRRCS7     | Leucine Rich Repeat Containing 57                                | 0.34  | 3.00   | 3.40   | 2.24   | 3.45 | 1.03E-03 | -0.39 | 7.94E-01 | -0.75 | 7.62E-01 | EGA2-1 |
| ENSMMUG00000001548   | HAUS2      | HAUS Augmin Like Complex Subunit 2                               | 1.03  | 16.13  | 20.21  | 11.07  | 3.62 | 1.26E-05 | 0.47  | 6.83E-01 | -0.86 | 6.21E-01 | EGA2-1 |
| ENSMMUG000000015123  | CDAN1      | Codanin 1                                                        | 0.26  | 4.08   | 3.22   | 1.87   | 4.24 | 7.80E-06 | 0.25  | 8.61E-01 | -0.73 | 7.47E-01 | EGA2-1 |
| ENSMMUG00000007870   | LOC712886  | Creatine Kinase U-type, Mitochondrial                            | 0.01  | 6.02   | 10.26  | 47.63  | 7.49 | 8.64E-10 | 1.08  | 4.43E-01 | 1.85  | 3.36E-01 | EGA2-1 |
| ENSMMUG000000022768  | HYPK       | Huntingtin Interacting Protein K                                 | 21.91 | 266.50 | 306.99 | 128.68 | 3.44 | 6.15E-06 | -0.02 | 9.88E-01 | -0.70 | 6.82E-01 | EGA2-1 |
| ENSMMUG000000014288  | EIF3J      | Eukaryotic Translation Initiation Factor 3 Subunit J             | 29.56 | 125.33 | 143.80 | 69.02  | 1.94 | 7.07E-05 | -0.02 | 9.78E-01 | -0.61 | 5.15E-01 | EGA2-1 |
| ENSMMUG000000014291  | SPG11      | SPG11, Spatacsin Vesicle Trafficking Associated                  | 1.18  | 7.11   | 7.24   | 6.86   | 2.61 | 3.78E-04 | 0.29  | 7.83E-01 | -0.13 | 9.63E-01 | EGA2-1 |
| ENSMMUG000000042950  |            |                                                                  | 0.72  | 4.57   | 8.27   | 15.29  | 2.25 | 7.56E-03 | 0.83  | 3.97E-01 | 0.79  | 6.37E-01 | EGA2-1 |
| ENSMMUG000000016097  | RPL7L1     | Ribosomal Protein L7 Like 1                                      | 1.75  | 23.36  | 26.72  | 25.94  | 3.57 | 1.37E-03 | 0.05  | 9.80E-01 | -0.10 | 9.82E-01 | EGA2-1 |
| ENSMMUG000000008575  | TRPM7      | Transient Receptor Potential Cation Channel Subfamily M Member 7 | 1.30  | 7.05   | 10.20  | 14.87  | 2.24 | 2.95E-04 | 0.96  | 1.71E-01 | 0.67  | 5.91E-01 | EGA2-1 |
| ENSMMUG000000002345  | TMOD3      | Tropomodulin 3                                                   | 2.68  | 12.29  | 29.37  | 25.54  | 2.19 | 5.13E-04 | 0.77  | 2.95E-01 | 1.22  | 2.03E-01 | EGA2-1 |
| ENSMMUG000000007504  | MYO5C      | Myosin VC                                                        | 0.34  | 2.92   | 2.08   | 1.09   | 3.14 | 8.14E-04 | -0.39 | 7.70E-01 | -0.52 | 8.28E-01 | EGA2-1 |
| ENSMMUG0000000045902 |            |                                                                  | 6.35  | 20.78  | 31.06  | 29.94  | 1.71 | 1.16E-02 | 0.71  | 3.60E-01 | -0.23 | 9.04E-01 | EGA2-1 |
| ENSMMUG0000000032402 |            |                                                                  | 1.24  | 5.65   | 10.09  | 6.01   | 1.58 | 2.10E-02 | 0.89  | 2.27E-01 | -0.64 | 6.32E-01 | EGA2-1 |
| ENSMMUG0000000020348 | BNIP2      | BCL2 Interacting Protein 2                                       | 2.24  | 20.97  | 11.08  | 7.62   | 2.91 | 2.41E-06 | -0.96 | 1.82E-01 | -0.04 | 9.86E-01 | EGA2-1 |
| ENSMMUG0000000029624 | LOC703344  | 60S Ribosomal Protein L36 Pseudogene                             | 26.21 | 115.03 | 133.92 | 118.56 | 2.01 | 5.00E-05 | 0.08  | 9.17E-01 | -0.43 | 6.94E-01 | EGA2-1 |
| ENSMMUG0000000016350 | RPS27L     | Ribosomal Protein S27 Like                                       | 8.64  | 89.50  | 67.17  | 38.00  | 3.54 | 1.32E-07 | -0.49 | 5.87E-01 | -0.79 | 5.58E-01 | EGA2-1 |
| ENSMMUG000000001247  | ZNF609     | Zinc Finger Protein 609                                          | 1.60  | 10.13  | 14.00  | 6.64   | 2.78 | 1.43E-04 | 0.23  | 8.37E-01 | -1.05 | 4.21E-01 | EGA2-1 |
| ENSMMUG0000000041779 |            |                                                                  | 1.28  | 4.36   | 4.79   | 6.26   | 2.10 | 7.47E-04 | -0.28 | 7.53E-01 | 0.00  | 9.99E-01 | EGA2-1 |
| ENSMMUG0000000006366 | PIF1       | PIF1 5'-to-3' DNA Helicase                                       | 0.12  | 2.20   | 0.82   | 2.43   | 3.88 | 4.04E-04 | -0.76 | 5.87E-01 | 0.65  | 8.11E-01 | EGA2-1 |
| ENSMMUG0000000006714 | CLPX       | Caseinolytic Mitochondrial Matrix Peptidase Chaperone Subunit    | 20.93 | 42.95  | 59.67  | 27.40  | 0.95 | 2.71E-02 | 0.69  | 1.21E-01 | -1.05 | 5.66E-02 | EGA2-1 |
| ENSMMUG0000000008311 |            |                                                                  | 5.77  | 27.71  | 17.16  | 6.20   | 2.30 | 3.18E-03 | -1.29 | 1.24E-01 | -1.35 | 2.66E-01 | EGA2-1 |
| ENSMMUG0000000014888 | RPLP1      | Ribosomal Protein Lateral Stalk Subunit P1                       | 77.56 | 219.18 | 502.98 | 351.29 | 1.71 | 8.05E-04 | 0.85  | 1.28E-01 | -0.48 | 6.52E-01 | EGA2-1 |
| ENSMMUG0000000014023 | TLE3       | Transducin Like Enhancer Of Split 3                              | 0.28  | 0.81   | 3.98   | 5.24   | 2.78 | 1.87E-02 | 1.52  | 2.36E-01 | 1.77  | 3.42E-01 | EGA2-1 |
| ENSMMUG0000000005448 | CD276      | CD276 Molecule                                                   | 3.95  | 17.98  | 8.70   | 1.92   | 2.44 | 3.48E-02 | -1.63 | 1.82E-01 | -1.79 | 3.11E-01 | EGA2-1 |
| ENSMMUG0000000021825 | SEMA7A     | Semaphorin 7A (John Milton Hagen Blood Group)                    | 0.05  | 0.47   | 0.62   | 0.16   | 5.64 | 9.16E-03 | -2.08 | 3.99E-01 | -2.90 | 4.26E-01 | EGA2-1 |
| ENSMMUG0000000005227 | MPI        | Mannose Phosphate Isomerase                                      | 0.16  | 3.95   | 4.99   | 5.05   | 4.53 | 7.24E-04 | 0.17  | 9.35E-01 | 0.98  | 7.53E-01 | EGA2-1 |
| ENSMMUG0000000011678 | RPP25      | Ribonuclease P And MRP Subunit P25                               | 0.04  | 10.10  | 5.14   | 2.86   | 9.06 | 9.43E-09 | -2.26 | 1.81E-01 | -0.24 | 9.68E-01 | EGA2-1 |
| ENSMMUG0000000018800 | SCAMP5     | Secretory Carrier Membrane Protein 5                             | 0.04  | 3.76   | 2.59   | 1.00   | 6.89 | 3.31E-09 | -2.01 | 1.29E-01 | -2.48 | 1.71E-01 | EGA2-1 |
| ENSMMUG0000000008529 | C7H15orf39 | Chromosome 7 Open Reading Frame, Human C15orf39                  | 7.25  | 27.50  | 19.52  | 14.14  | 1.71 | 1.80E-03 | -0.27 | 7.17E-01 | -0.41 | 7.43E-01 | EGA2-1 |

|                     |              |                                                         |        |        |        |        |      |          |       |          |       |          |        |
|---------------------|--------------|---------------------------------------------------------|--------|--------|--------|--------|------|----------|-------|----------|-------|----------|--------|
| ENSMMUG00000045566  | FAM103A1     | Family With Sequence Similarity 103 Member A1           | 7.07   | 61.29  | 50.50  | 21.07  | 2.81 | 1.74E-03 | -0.11 | 9.37E-01 | -1.16 | 4.72E-01 | EGA2-1 |
| ENSMMUG00000002403  | WDR73        | WD Repeat Domain 73                                     | 0.40   | 7.19   | 6.05   | 3.99   | 4.52 | 1.97E-03 | 0.18  | 9.40E-01 | 0.95  | 7.86E-01 | EGA2-1 |
| ENSMMUG00000022516  | AEN          | Apoptosis Enhancing Nuclease                            | 0.07   | 1.94   | 1.13   | 1.47   | 3.88 | 1.63E-02 | -0.15 | 9.52E-01 | -1.78 | 5.37E-01 | EGA2-1 |
| ENSMMUG00000018122  | MEF2A        | Myocyte Enhancer Factor 2A                              | 0.93   | 5.18   | 8.63   | 5.00   | 2.89 | 1.61E-04 | -0.60 | 5.46E-01 | 0.63  | 7.15E-01 | EGA2-1 |
| ENSMMUG00000011826  | SNRPA1       | Small Nuclear Ribonucleoprotein Polypeptide A'          | 2.03   | 10.28  | 8.49   | 5.64   | 2.18 | 1.78E-02 | -0.98 | 3.47E-01 | 0.03  | 9.94E-01 | EGA2-1 |
| ENSMMUG00000006283  | LOC700872    | 60S Ribosomal Protein L18a-like                         | 6.94   | 61.52  | 53.29  | 51.10  | 3.82 | 5.55E-06 | -0.76 | 4.79E-01 | -0.32 | 9.00E-01 | EGA2-1 |
| ENSMMUG00000014809  | HNRNPC       | Heterogeneous Nuclear Ribonucleoprotein C (C1/C2)       | 69.05  | 202.15 | 159.75 | 147.26 | 1.48 | 1.94E-04 | -0.47 | 3.21E-01 | 0.04  | 9.82E-01 | EGA2-1 |
| ENSMMUG00000021552  | RPGRIP1      | RPGR Interacting Protein 1                              | 0.00   | 0.77   | 0.27   | 0.07   | 7.00 | 7.24E-04 | -3.52 | 1.01E-01 | 0.20  | 9.78E-01 | EGA2-1 |
| ENSMMUG00000015000  | SUPT16H      | SPT16 Homolog, Facilitates Chromatin Remodeling Subunit | 16.81  | 38.57  | 43.40  | 27.20  | 1.36 | 3.17E-02 | -0.22 | 7.94E-01 | -0.23 | 8.97E-01 | EGA2-1 |
| ENSMMUG00000000830  |              |                                                         | 48.21  | 115.82 | 98.24  | 67.93  | 1.42 | 4.28E-02 | -0.54 | 5.13E-01 | -0.41 | 7.98E-01 | EGA2-1 |
| ENSMMUG00000000411  | OXA1L        | OXA1L, Mitochondrial Inner Membrane Protein             | 9.47   | 32.86  | 57.96  | 70.40  | 1.86 | 9.32E-03 | 1.09  | 1.57E-01 | -0.29 | 8.79E-01 | EGA2-1 |
| ENSMMUG00000000413  | SLC7A7       | Solute Carrier Family 7 Member 7                        | 0.03   | 2.91   | 1.42   | 3.74   | 6.89 | 4.10E-07 | -1.89 | 2.34E-01 | 1.93  | 4.34E-01 | EGA2-1 |
| ENSMMUG00000013663  | MRPL52       | Mitochondrial Ribosomal Protein L52                     | 0.70   | 23.03  | 11.23  | 11.40  | 5.24 | 8.98E-09 | -0.75 | 5.29E-01 | -0.50 | 8.40E-01 | EGA2-1 |
| ENSMMUG00000013665  | MMP14        | Matrix Metalloproteinase 14                             | 0.60   | 3.24   | 0.52   | 6.01   | 3.24 | 2.10E-02 | -2.66 | 6.27E-02 | 3.52  | 5.01E-02 | EGA2-1 |
| ENSMMUG0000001035   | PRMT5        | Protein Arginine Methyltransferase 5                    | 6.76   | 27.26  | 24.11  | 21.04  | 2.05 | 1.12E-03 | -0.23 | 8.03E-01 | -0.55 | 6.81E-01 | EGA2-1 |
| ENSMMUG00000012979  | ACIN1        | Apoptotic Chromatin Condensation Inducer 1              | 23.86  | 53.61  | 34.69  | 33.92  | 1.20 | 2.15E-02 | -0.91 | 8.87E-02 | 0.26  | 8.37E-01 | EGA2-1 |
| ENSMMUG00000012481  | IPO4         | Importin 4                                              | 0.51   | 3.65   | 9.91   | 6.57   | 3.13 | 1.05E-04 | 1.46  | 1.01E-01 | -0.01 | 9.98E-01 | EGA2-1 |
| ENSMMUG00000012496  | TSSK4        | Testis Specific Serine Kinase 4                         | 0.07   | 0.63   | 0.49   | 0.79   | 3.42 | 3.92E-02 | -0.39 | 8.62E-01 | 2.13  | 4.31E-01 | EGA2-1 |
| ENSMMUG000000009513 | NYNRIN       | NYN Domain And Retroviral Integrase Containing          | 0.08   | 2.65   | 2.36   | 7.13   | 5.35 | 1.88E-05 | -0.03 | 9.88E-01 | 1.93  | 3.72E-01 | EGA2-1 |
| ENSMMUG00000021444  | FOXP1        | Forkhead Box G1                                         | 0.00   | 2.34   | 1.76   | 1.46   | 9.65 | 3.12E-07 | -2.44 | 2.23E-01 | 1.72  | 6.38E-01 | EGA2-1 |
| ENSMMUG00000011515  | STRN3        | Striatin 3                                              | 1.70   | 6.18   | 10.48  | 8.57   | 1.79 | 1.49E-02 | 0.33  | 7.38E-01 | 0.28  | 8.92E-01 | EGA2-1 |
| ENSMMUG00000016346  | ARHGAP5      | Rho GTPase Activating Protein 5                         | 4.53   | 32.09  | 21.43  | 18.77  | 2.91 | 6.43E-11 | -0.82 | 1.15E-01 | -0.12 | 9.42E-01 | EGA2-1 |
| ENSMMUG00000045671  | EAPP         | E2F Associated Phosphoprotein                           | 1.02   | 5.10   | 7.10   | 5.58   | 2.13 | 1.02E-02 | 0.21  | 8.60E-01 | 0.13  | 9.66E-01 | EGA2-1 |
| ENSMMUG00000016544  | PSMA6        | Proteasome Subunit Alpha 6                              | 28.45  | 122.20 | 76.86  | 56.81  | 1.49 | 4.29E-02 | -0.37 | 6.89E-01 | 0.24  | 9.07E-01 | EGA2-1 |
| ENSMMUG00000046071  |              |                                                         | 0.11   | 5.36   | 3.39   | 3.34   | 5.20 | 8.63E-03 | -0.87 | 7.33E-01 | -0.99 | 8.43E-01 | EGA2-1 |
| ENSMMUG00000029375  |              |                                                         | 8.05   | 42.38  | 45.28  | 49.65  | 2.81 | 5.00E-06 | 0.05  | 9.60E-01 | -0.24 | 9.00E-01 | EGA2-1 |
| ENSMMUG00000010862  | PRPF39       | Pre-mRNA Processing Factor 39                           | 2.06   | 13.68  | 6.12   | 15.27  | 2.24 | 4.64E-03 | -1.09 | 2.15E-01 | 1.52  | 1.92E-01 | EGA2-1 |
| ENSMMUG00000017625  |              |                                                         | 151.15 | 551.92 | 611.61 | 502.08 | 2.07 | 5.47E-17 | 0.07  | 8.68E-01 | -0.40 | 3.89E-01 | EGA2-1 |
| ENSMMUG00000008286  | RPL36AL      | Ribosomal Protein L36a Like                             | 26.24  | 161.33 | 208.68 | 209.50 | 2.56 | 3.47E-05 | 0.57  | 4.64E-01 | 0.07  | 9.77E-01 | EGA2-1 |
| ENSMMUG00000014648  |              |                                                         | 2.19   | 10.40  | 12.42  | 12.04  | 2.78 | 4.53E-06 | -0.09 | 9.28E-01 | 0.07  | 9.74E-01 | EGA2-1 |
| ENSMMUG00000014670  | PYGL         | Glycogen Phosphorylase L                                | 0.05   | 1.40   | 1.69   | 0.55   | 5.09 | 1.51E-03 | -2.10 | 2.29E-01 | 3.62  | 9.89E-02 | EGA2-1 |
| ENSMMUG00000038066  | STYX         | Serine/threonine/tyrosine Interacting Protein           | 0.76   | 9.29   | 18.91  | 17.36  | 3.60 | 8.41E-09 | 1.03  | 1.61E-01 | -0.32 | 8.53E-01 | EGA2-1 |
| ENSMMUG00000000304  | SOCS4        | Suppressor Of Cytokine Signaling 4                      | 1.34   | 9.08   | 9.71   | 8.69   | 2.95 | 5.52E-05 | 0.11  | 9.24E-01 | 0.49  | 7.89E-01 | EGA2-1 |
| ENSMMUG00000044678  | LOC100427696 | 40S Ribosomal Protein S27-like                          | 4.84   | 22.35  | 40.91  | 36.63  | 2.05 | 7.30E-04 | 0.87  | 2.00E-01 | -0.09 | 9.67E-01 | EGA2-1 |
| ENSMMUG00000029341  |              |                                                         | 30.07  | 59.02  | 31.30  | 21.53  | 1.14 | 2.65E-02 | -0.97 | 6.47E-02 | -0.44 | 6.81E-01 | EGA2-1 |

|                     |              |                                                                     |        |         |        |        |      |          |       |          |       |          |        |
|---------------------|--------------|---------------------------------------------------------------------|--------|---------|--------|--------|------|----------|-------|----------|-------|----------|--------|
| ENSMMUG00000029338  | LOC702514    | 40S Ribosomal Protein S4, X Isoform-like                            | 39.36  | 145.48  | 252.87 | 159.39 | 2.02 | 2.91E-08 | 0.79  | 5.22E-02 | -0.77 | 1.80E-01 | EGA2-1 |
| ENSMMUG00000007369  |              |                                                                     | 1.53   | 13.85   | 24.82  | 24.35  | 3.23 | 9.75E-06 | 0.54  | 5.75E-01 | -0.03 | 9.93E-01 | EGA2-1 |
| ENSMMUG00000001640  |              |                                                                     | 0.04   | 2.09    | 1.07   | 0.50   | 5.63 | 2.21E-05 | -1.04 | 5.29E-01 | -1.83 | 4.28E-01 | EGA2-1 |
| ENSMMUG00000000201  |              |                                                                     | 199.27 | 662.22  | 544.47 | 340.85 | 1.84 | 3.64E-09 | -0.64 | 7.16E-02 | -0.25 | 7.40E-01 | EGA2-1 |
| ENSMMUG00000042066  | AKAP5        | A-kinase Anchoring Protein 5                                        | 0.15   | 0.41    | 1.21   | 0.66   | 3.56 | 1.03E-02 | 0.27  | 8.92E-01 | 0.16  | 9.74E-01 | EGA2-1 |
| ENSMMUG00000004748  | ZBTB1        | Zinc Finger And BTB Domain Containing 1                             | 0.42   | 1.47    | 3.95   | 1.56   | 1.74 | 1.25E-02 | 0.33  | 7.18E-01 | 0.03  | 9.92E-01 | EGA2-1 |
| ENSMMUG000000041003 |              |                                                                     | 7.63   | 32.67   | 77.58  | 38.55  | 2.10 | 4.31E-05 | 0.97  | 8.60E-02 | -0.27 | 8.46E-01 | EGA2-1 |
| ENSMMUG00000043108  | LOC100428346 | Peptidyl-prolyl Cis-trans Isomerase A Pseudogene                    | 25.46  | 148.20  | 233.95 | 251.26 | 2.61 | 5.81E-05 | 0.79  | 3.08E-01 | 0.66  | 6.25E-01 | EGA2-1 |
| ENSMMUG000000039433 |              |                                                                     | 0.07   | 2.57    | 4.72   | 6.94   | 4.02 | 3.06E-02 | 1.42  | 4.52E-01 | 2.93  | 2.31E-01 | EGA2-1 |
| ENSMMUG000000021571 | ERH          | ERH, MRNA Splicing And Mitosis Factor                               | 41.20  | 124.68  | 92.62  | 50.40  | 1.59 | 5.40E-03 | -0.52 | 4.41E-01 | -0.74 | 4.57E-01 | EGA2-1 |
| ENSMMUG000000021572 | SLC39A9      | Solute Carrier Family 39 Member 9                                   | 1.74   | 8.37    | 10.42  | 11.61  | 2.06 | 2.69E-03 | 0.74  | 3.58E-01 | -0.17 | 9.40E-01 | EGA2-1 |
| ENSMMUG000000044306 |              |                                                                     | 0.00   | 0.32    | 0.63   | 0.66   | 5.72 | 1.47E-02 | 0.77  | 7.94E-01 | 0.53  | 9.40E-01 | EGA2-1 |
| ENSMMUG000000029297 | LOC713632    | Disintegrin And Metalloproteinase Domain-containing Protein 20-like | 0.01   | 0.38    | 0.87   | 0.55   | 6.26 | 9.15E-03 | 0.69  | 8.24E-01 | -0.01 | 9.99E-01 | EGA2-1 |
| ENSMMUG000000042743 | LOC100424690 | Peptidyl-prolyl Cis-trans Isomerase A Pseudogene                    | 16.99  | 85.53   | 151.50 | 152.27 | 2.50 | 8.63E-05 | 0.91  | 2.20E-01 | 0.68  | 5.99E-01 | EGA2-1 |
| ENSMMUG000000005140 |              |                                                                     | 0.20   | 24.35   | 23.33  | 3.87   | 7.27 | 2.40E-19 | -0.82 | 4.37E-01 | -2.24 | 5.77E-02 | EGA2-1 |
| ENSMMUG000000002332 | RBM25        | RNA Binding Motif Protein 25                                        | 47.78  | 192.79  | 288.75 | 109.05 | 1.96 | 6.98E-05 | 0.62  | 2.92E-01 | -1.17 | 1.00E-01 | EGA2-1 |
| ENSMMUG000000006239 |              |                                                                     | 205.46 | 581.61  | 477.77 | 287.61 | 1.41 | 1.59E-05 | -0.51 | 1.72E-01 | -0.33 | 6.26E-01 | EGA2-1 |
| ENSMMUG000000008887 | FCF1         | FCF1, RRNA-processing Protein                                       | 15.23  | 40.75   | 35.09  | 14.51  | 1.92 | 8.61E-04 | -0.64 | 3.46E-01 | -0.71 | 5.08E-01 | EGA2-1 |
| ENSMMUG000000017665 | FLVCR2       | Feline Leukemia Virus Subgroup C Cellular Receptor Family Member 2  | 0.07   | 3.77    | 0.09   | 0.18   | 4.39 | 2.55E-03 | -2.89 | 6.52E-02 | 0.95  | 8.07E-01 | EGA2-1 |
| ENSMMUG000000029259 |              |                                                                     | 3.89   | 10.49   | 30.67  | 18.28  | 1.73 | 8.09E-03 | 1.27  | 5.99E-02 | -0.89 | 4.26E-01 | EGA2-1 |
| ENSMMUG000000022122 | GTF2A1       | General Transcription Factor IIA Subunit 1                          | 4.46   | 16.25   | 13.52  | 16.47  | 1.81 | 4.27E-06 | -0.09 | 8.85E-01 | 0.19  | 8.67E-01 | EGA2-1 |
| ENSMMUG000000014945 | PPP4R3A      | Protein Phosphatase 4 Regulatory Subunit 3A                         | 7.25   | 32.45   | 36.97  | 29.96  | 2.09 | 2.21E-06 | 0.57  | 2.83E-01 | -0.48 | 6.05E-01 | EGA2-1 |
| ENSMMUG000000020751 | ATXN3        | Ataxin 3                                                            | 9.53   | 21.50   | 11.82  | 7.50   | 1.60 | 3.93E-02 | -1.47 | 5.82E-02 | -0.02 | 9.93E-01 | EGA2-1 |
| ENSMMUG000000044581 | MOAP1        | Modulator Of Apoptosis 1                                            | 0.64   | 3.25    | 2.27   | 1.27   | 2.67 | 1.02E-02 | -0.42 | 7.70E-01 | -1.25 | 5.02E-01 | EGA2-1 |
| ENSMMUG000000012397 |              |                                                                     | 31.66  | 122.01  | 73.98  | 55.87  | 1.47 | 4.58E-02 | -0.42 | 6.40E-01 | 0.13  | 9.60E-01 | EGA2-1 |
| ENSMMUG000000009738 | SLC25A29     | Solute Carrier Family 25 Member 29                                  | 0.38   | 2.43    | 5.45   | 9.30   | 2.68 | 2.75E-02 | 1.44  | 2.78E-01 | 0.81  | 7.63E-01 | EGA2-1 |
| ENSMMUG000000003483 | CINP         | Cyclin Dependent Kinase 2 Interacting Protein                       | 1.49   | 13.39   | 37.02  | 10.78  | 3.66 | 7.48E-05 | 1.28  | 2.33E-01 | -2.11 | 1.17E-01 | EGA2-1 |
| ENSMMUG000000005630 | EIF5         | Eukaryotic Translation Initiation Factor 5                          | 24.28  | 72.21   | 102.50 | 64.96  | 1.27 | 2.63E-02 | 0.73  | 2.41E-01 | -0.71 | 4.63E-01 | EGA2-1 |
| ENSMMUG000000007673 | TRMT61A      | TRNA Methyltransferase 61A                                          | 0.04   | 1.48    | 0.98   | 1.51   | 7.62 | 3.03E-04 | -3.52 | 1.08E-01 | 3.14  | 3.84E-01 | EGA2-1 |
| ENSMMUG000000004915 |              |                                                                     | 11.55  | 67.80   | 80.57  | 109.48 | 2.01 | 2.10E-03 | 0.46  | 5.72E-01 | 0.87  | 4.51E-01 | EGA2-1 |
| ENSMMUG000000022663 | SLC25A6      | Solute Carrier Family 25 Member 6                                   | 14.57  | 41.65   | 40.44  | 64.64  | 1.39 | 8.66E-03 | -0.18 | 8.11E-01 | 0.33  | 7.93E-01 | EGA2-1 |
| ENSMMUG000000008306 | PRKX         | Protein Kinase, X-linked                                            | 1.99   | 5.56    | 5.87   | 4.15   | 2.61 | 1.17E-02 | -0.17 | 9.10E-01 | 0.12  | 9.74E-01 | EGA2-1 |
| ENSMMUG000000045189 |              |                                                                     | 0.03   | 4.67    | 0.53   | 0.14   | 6.19 | 1.74E-03 | -1.53 | 5.09E-01 | -2.86 | 4.03E-01 | EGA2-1 |
| ENSMMUG000000009370 |              |                                                                     | 0.02   | 2.03    | 16.44  | 11.90  | 6.97 | 6.80E-07 | 2.37  | 7.56E-02 | 1.49  | 5.40E-01 | EGA2-1 |
| ENSMMUG000000022618 | RAB9A        | RAB9A, Member RAS Oncogene Family                                   | 0.08   | 0.95    | 3.78   | 4.39   | 3.81 | 6.76E-03 | 2.56  | 7.46E-02 | -0.79 | 8.13E-01 | EGA2-1 |
| ENSMMUG000000017839 | FANCB        | Fanconi Anemia Complementation Group B                              | 0.76   | 6.63    | 4.55   | 1.66   | 2.94 | 2.04E-03 | -1.77 | 8.16E-02 | 0.23  | 9.44E-01 | EGA2-1 |
| ENSMMUG000000014052 | CA5B         | Carbonic Anhydrase 5B                                               | 0.38   | 6.89    | 9.80   | 5.49   | 3.31 | 3.82E-03 | 0.90  | 5.20E-01 | -1.25 | 5.62E-01 | EGA2-1 |
| ENSMMUG000000010157 |              |                                                                     | 45.55  | 212.08  | 251.62 | 265.30 | 2.58 | 1.15E-06 | 0.07  | 9.38E-01 | -0.21 | 8.95E-01 | EGA2-1 |
| ENSMMUG000000010727 | LOC694887    | Prothymosin Alpha-like                                              | 180.52 | 1478.03 | 904.95 | 635.90 | 2.65 | 2.74E-07 | -0.49 | 4.59E-01 | -0.32 | 8.13E-01 | EGA2-1 |

|                    |           |                                                                 |        |        |        |        |       |          |       |          |       |          |        |
|--------------------|-----------|-----------------------------------------------------------------|--------|--------|--------|--------|-------|----------|-------|----------|-------|----------|--------|
| ENSMMUG0000000193  | EIF1AX    | Eukaryotic Translation Initiation Factor 1A, X-linked           | 16.66  | 97.75  | 127.35 | 60.36  | 2.51  | 2.71E-05 | 0.07  | 9.47E-01 | -0.57 | 6.61E-01 | EGA2-1 |
| ENSMMUG00000012379 |           |                                                                 | 27.67  | 69.94  | 107.45 | 119.10 | 1.14  | 2.28E-02 | 0.82  | 1.17E-01 | -0.23 | 8.54E-01 | EGA2-1 |
| ENSMMUG00000021366 | PRDX4     | Peroxiredoxin 4                                                 | 2.56   | 7.87   | 20.31  | 8.07   | 1.93  | 4.67E-02 | 1.36  | 1.81E-01 | -0.80 | 6.81E-01 | EGA2-1 |
| ENSMMUG00000006979 | EIF2S3    | Eukaryotic Translation Initiation Factor 2 Subunit Gamma        | 3.27   | 33.41  | 73.08  | 73.91  | 3.62  | 3.05E-09 | 0.78  | 3.01E-01 | 0.07  | 9.76E-01 | EGA2-1 |
| ENSMMUG00000032498 | LOC701053 | Coiled-coil-helix-coiled-coil-helix Domain-containing Protein 2 | 176.02 | 479.43 | 275.66 | 142.76 | 1.46  | 3.95E-03 | -0.87 | 1.05E-01 | -0.82 | 3.12E-01 | EGA2-1 |
| ENSMMUG00000016657 | LOC701718 | Putative SMEK Homolog 3                                         | 0.01   | 0.36   | 1.15   | 0.30   | 5.63  | 8.42E-03 | 0.37  | 9.01E-01 | -2.60 | 4.63E-01 | EGA2-1 |
| ENSMMUG00000012771 | LOC703594 | Melanoma-associated Antigen B2                                  | 0.03   | 16.82  | 11.57  | 0.90   | 8.48  | 2.21E-11 | -0.49 | 7.89E-01 | -2.50 | 2.09E-01 | EGA2-1 |
| ENSMMUG00000012774 | MAGEB1    | MAGE Family Member B1                                           | 0.01   | 17.02  | 11.67  | 1.80   | 10.52 | 1.37E-16 | 0.09  | 9.64E-01 | -2.79 | 1.24E-01 | EGA2-1 |
| ENSMMUG00000041294 | LOC696657 | Peptidyl-prolyl Cis-trans Isomerase D Pseudogene                | 6.79   | 25.94  | 26.27  | 17.94  | 1.67  | 1.55E-03 | -0.30 | 6.75E-01 | 0.51  | 6.37E-01 | EGA2-1 |
| ENSMMUG00000005292 | BCOR      | BCL6 Corepressor                                                | 0.21   | 24.24  | 26.57  | 10.98  | 7.17  | 3.10E-23 | 0.18  | 8.84E-01 | -1.08 | 4.43E-01 | EGA2-1 |
| ENSMMUG00000001017 |           |                                                                 | 0.56   | 15.06  | 5.83   | 4.68   | 4.65  | 1.41E-09 | -1.34 | 1.31E-01 | -0.78 | 6.41E-01 | EGA2-1 |
| ENSMMUG00000002859 | LOC708074 | 60S Ribosomal Protein L29-like                                  | 12.49  | 62.88  | 96.27  | 68.43  | 2.57  | 3.55E-05 | 0.65  | 3.94E-01 | -1.06 | 3.01E-01 | EGA2-1 |
| ENSMMUG00000003505 | FUNDC1    | FUN14 Domain Containing 1                                       | 0.82   | 44.35  | 23.68  | 22.84  | 5.57  | 7.56E-10 | -0.68 | 5.78E-01 | 0.30  | 9.16E-01 | EGA2-1 |
| ENSMMUG00000032470 | LOC703919 | 60S Ribosomal Protein L36a-like                                 | 10.51  | 67.49  | 89.04  | 90.70  | 2.61  | 2.79E-04 | 0.64  | 4.74E-01 | -0.04 | 9.88E-01 | EGA2-1 |
| ENSMMUG00000023018 | RP2       | RP2, ARL3 GTPase Activating Protein                             | 0.87   | 4.78   | 6.04   | 3.39   | 1.97  | 1.85E-02 | 0.91  | 3.33E-01 | -0.39 | 8.53E-01 | EGA2-1 |
| ENSMMUG00000017423 | RBM10     | RNA Binding Motif Protein 10                                    | 0.84   | 9.41   | 8.05   | 5.70   | 3.51  | 1.04E-08 | -0.46 | 5.84E-01 | 0.21  | 9.12E-01 | EGA2-1 |
| ENSMMUG00000017428 | UBA1      | Ubiquitin Like Modifier Activating Enzyme 1                     | 8.87   | 37.18  | 44.12  | 34.25  | 2.16  | 1.03E-05 | 0.26  | 7.07E-01 | -0.32 | 8.03E-01 | EGA2-1 |
| ENSMMUG00000008566 | ZNF157    | Zinc Finger Protein 157                                         | 0.09   | 3.18   | 1.40   | 0.82   | 5.07  | 5.29E-06 | 0.10  | 9.57E-01 | -0.95 | 7.10E-01 | EGA2-1 |
| ENSMMUG00000010404 | ZNF41     | Zinc Finger Protein 41                                          | 0.66   | 3.62   | 6.24   | 5.54   | 2.79  | 1.93E-03 | 1.05  | 3.16E-01 | -0.35 | 8.91E-01 | EGA2-1 |
| ENSMMUG00000005347 |           |                                                                 | 0.01   | 5.45   | 0.72   | 0.03   | 8.42  | 4.91E-04 | -4.03 | 1.08E-01 | -2.67 | 5.79E-01 | EGA2-1 |
| ENSMMUG00000014463 | LOC709684 | Protein SSX4-like                                               | 0.03   | 18.02  | 9.04   | 1.72   | 9.59  | 3.63E-12 | -1.38 | 3.86E-01 | -2.53 | 2.33E-01 | EGA2-1 |
| ENSMMUG00000008046 | LOC709597 | Protein SSX3                                                    | 0.00   | 2.39   | 1.03   | 0.09   | 8.02  | 1.03E-05 | -1.77 | 3.75E-01 | -3.53 | 1.90E-01 | EGA2-1 |
| ENSMMUG00000018894 | FTSJ1     | FtsJ RNA Methyltransferase Homolog 1                            | 1.28   | 7.32   | 4.61   | 3.20   | 2.92  | 5.77E-04 | -1.13 | 2.48E-01 | 0.95  | 5.65E-01 | EGA2-1 |
| ENSMMUG00000018349 |           |                                                                 | 2.83   | 20.61  | 41.99  | 42.51  | 3.25  | 2.48E-03 | -0.11 | 9.51E-01 | 1.12  | 5.95E-01 | EGA2-1 |
| ENSMMUG00000004439 |           |                                                                 | 5.56   | 50.87  | 100.77 | 99.48  | 3.28  | 3.24E-04 | 0.82  | 4.65E-01 | 0.12  | 9.73E-01 | EGA2-1 |
| ENSMMUG00000004548 | PQBP1     | Polyglutamine Binding Protein 1                                 | 5.78   | 84.56  | 24.13  | 20.24  | 3.93  | 3.22E-04 | -1.75 | 1.52E-01 | -0.40 | 9.02E-01 | EGA2-1 |
| ENSMMUG00000041376 |           |                                                                 | 0.61   | 32.95  | 7.95   | 1.10   | 6.02  | 4.00E-04 | -2.11 | 2.77E-01 | -2.43 | 4.23E-01 | EGA2-1 |
| ENSMMUG00000002333 | LOC693330 | G Antigen 10                                                    | 0.17   | 39.40  | 31.46  | 4.17   | 7.78  | 1.02E-08 | -0.02 | 9.93E-01 | -1.87 | 4.65E-01 | EGA2-1 |
| ENSMMUG00000007939 |           |                                                                 | 37.13  | 165.26 | 195.26 | 198.35 | 2.45  | 4.31E-06 | 0.16  | 8.45E-01 | -0.30 | 8.33E-01 | EGA2-1 |
| ENSMMUG00000040204 | FAM156B   | Family With Sequence Similarity 156 Member B                    | 0.52   | 2.75   | 3.74   | 3.71   | 3.35  | 9.65E-04 | -0.10 | 9.52E-01 | 0.92  | 6.65E-01 | EGA2-1 |
| ENSMMUG00000009293 | SMC1A     | Structural Maintenance Of Chromosomes 1A                        | 26.82  | 61.00  | 75.05  | 61.39  | 1.19  | 3.28E-02 | 0.23  | 7.50E-01 | 0.10  | 9.61E-01 | EGA2-1 |
| ENSMMUG00000008760 | FAM120C   | Family With Sequence Similarity 120C                            | 0.38   | 3.38   | 2.41   | 1.78   | 2.50  | 2.35E-02 | 0.00  | 1.00E+00 | -0.05 | 9.91E-01 | EGA2-1 |
| ENSMMUG00000012613 | FGD1      | FYVE, RhoGEF And PH Domain Containing 1                         | 0.18   | 3.07   | 7.06   | 6.67   | 3.12  | 4.23E-02 | 2.73  | 7.43E-02 | 1.05  | 7.53E-01 | EGA2-1 |
| ENSMMUG00000008231 | GNL3L     | G Protein Nucleolar 3 Like                                      | 0.75   | 12.10  | 8.99   | 10.53  | 4.37  | 1.14E-05 | -0.76 | 5.61E-01 | 1.40  | 4.40E-01 | EGA2-1 |
| ENSMMUG00000042087 | UBQLN2    | Ubiquilin 2                                                     | 0.89   | 6.37   | 4.39   | 4.86   | 3.63  | 9.58E-04 | -0.77 | 5.84E-01 | -1.01 | 6.61E-01 | EGA2-1 |
| ENSMMUG00000048576 |           |                                                                 | 4.50   | 16.78  | 18.04  | 12.54  | 1.71  | 4.41E-03 | -0.29 | 7.21E-01 | 0.63  | 5.86E-01 | EGA2-1 |
| ENSMMUG00000004309 | AMER1     | APC Membrane Recruitment Protein 1                              | 0.07   | 4.26   | 2.50   | 0.63   | 7.48  | 6.43E-11 | -1.65 | 2.29E-01 | -1.43 | 5.29E-01 | EGA2-1 |
| ENSMMUG00000003922 | LAS1L     | LAS1 Like, Ribosome Biogenesis Factor                           | 4.75   | 17.31  | 18.17  | 9.16   | 1.63  | 3.90E-02 | -0.07 | 9.53E-01 | -0.23 | 9.20E-01 | EGA2-1 |
| ENSMMUG00000041401 |           |                                                                 | 0.18   | 1.26   | 3.87   | 6.12   | 3.46  | 6.18E-04 | 1.33  | 2.33E-01 | 0.84  | 6.95E-01 | EGA2-1 |

|                    |           |                                                        |        |        |        |        |       |          |       |          |       |          |        |
|--------------------|-----------|--------------------------------------------------------|--------|--------|--------|--------|-------|----------|-------|----------|-------|----------|--------|
| ENSMMUG00000047336 | PJA1      | Praja Ring Finger Ubiquitin Ligase 1                   | 0.23   | 5.84   | 2.06   | 1.78   | 5.39  | 2.63E-04 | -2.66 | 9.93E-02 | 2.08  | 4.31E-01 | EGA2-1 |
| ENSMMUG00000031987 |           |                                                        | 5.10   | 24.00  | 30.75  | 19.47  | 2.23  | 6.03E-04 | 0.66  | 3.97E-01 | -0.51 | 7.33E-01 | EGA2-1 |
| ENSMMUG00000003049 | TEX11     | Testis Expressed 11                                    | 0.02   | 2.53   | 0.36   | 0.43   | 7.87  | 1.46E-07 | -2.16 | 1.85E-01 | 0.33  | 9.50E-01 | EGA2-1 |
| ENSMMUG00000003274 | SLC7A3    | Solute Carrier Family 7 Member 3                       | 0.02   | 8.28   | 7.17   | 28.28  | 5.55  | 7.45E-05 | 1.17  | 4.63E-01 | 0.34  | 9.37E-01 | EGA2-1 |
| ENSMMUG00000020479 | ITGB1BP2  | Integrin Subunit Beta 1 Binding Protein 2              | 0.01   | 1.56   | 2.08   | 0.39   | 5.83  | 7.19E-03 | 2.60  | 2.50E-01 | -3.64 | 2.33E-01 | EGA2-1 |
| ENSMMUG00000012956 | PIN4      | Peptidylprolyl Cis/trans Isomerase, NIMA-interacting 4 | 15.72  | 79.23  | 81.25  | 41.60  | 2.46  | 1.50E-02 | -0.07 | 9.62E-01 | -0.26 | 9.34E-01 | EGA2-1 |
| ENSMMUG00000003295 | RPS4X     | Ribosomal Protein S4, X-linked                         | 63.82  | 244.60 | 411.60 | 256.70 | 2.10  | 9.55E-09 | 0.73  | 7.86E-02 | -0.75 | 2.00E-01 | EGA2-1 |
| ENSMMUG00000045943 |           |                                                        | 0.68   | 2.87   | 3.01   | 0.67   | 3.69  | 2.20E-02 | -0.48 | 8.27E-01 | -0.64 | 8.87E-01 | EGA2-1 |
| ENSMMUG00000041066 |           |                                                        | 1.62   | 14.92  | 13.45  | 7.42   | 3.40  | 2.92E-05 | -0.43 | 7.06E-01 | -0.99 | 5.30E-01 | EGA2-1 |
| ENSMMUG00000031446 |           |                                                        | 4.95   | 14.36  | 21.42  | 35.59  | 1.38  | 1.19E-02 | 0.94  | 1.01E-01 | 0.38  | 7.62E-01 | EGA2-1 |
| ENSMMUG00000041102 |           |                                                        | 0.01   | 1.01   | 1.72   | 1.92   | 6.16  | 1.25E-02 | -1.00 | 7.47E-01 | 2.62  | 5.36E-01 | EGA2-1 |
| ENSMMUG00000039999 |           |                                                        | 0.11   | 16.83  | 25.67  | 10.75  | 7.03  | 9.07E-10 | 0.81  | 5.84E-01 | -1.26 | 5.77E-01 | EGA2-1 |
| ENSMMUG00000007887 |           |                                                        | 98.89  | 265.00 | 261.65 | 253.62 | 1.48  | 5.31E-06 | -0.03 | 9.49E-01 | -0.23 | 7.80E-01 | EGA2-1 |
| ENSMMUG00000016776 | CHM       | CHM, Rab Escort Protein 1                              | 0.73   | 4.22   | 5.30   | 6.09   | 3.04  | 1.72E-07 | -0.18 | 8.41E-01 | 1.29  | 1.48E-01 | EGA2-1 |
| ENSMMUG00000038230 |           |                                                        | 0.79   | 11.14  | 5.91   | 5.72   | 4.38  | 3.58E-08 | -1.65 | 6.49E-02 | 0.52  | 8.03E-01 | EGA2-1 |
| ENSMMUG00000019594 | LOC698056 | DDB1- And CUL4-associated Factor 13                    | 19.95  | 54.08  | 36.93  | 13.97  | 1.24  | 6.01E-03 | -0.56 | 2.67E-01 | -1.08 | 7.62E-02 | EGA2-1 |
| ENSMMUG00000014259 |           |                                                        | 5.43   | 16.27  | 39.32  | 20.82  | 1.67  | 1.80E-02 | 0.88  | 2.54E-01 | -0.24 | 9.04E-01 | EGA2-1 |
| ENSMMUG00000016254 |           |                                                        | 16.19  | 92.50  | 74.16  | 41.50  | 2.50  | 6.73E-06 | -0.38 | 6.08E-01 | -0.64 | 5.61E-01 | EGA2-1 |
| ENSMMUG00000045262 |           |                                                        | 1.27   | 22.60  | 9.96   | 10.49  | 4.50  | 2.11E-10 | -1.39 | 8.67E-02 | 0.23  | 9.18E-01 | EGA2-1 |
| ENSMMUG00000029479 |           |                                                        | 0.68   | 7.64   | 11.53  | 17.83  | 3.15  | 6.50E-03 | 1.01  | 4.62E-01 | -0.37 | 9.12E-01 | EGA2-1 |
| ENSMMUG00000011078 | PCDH19    | Protocadherin 19                                       | 0.03   | 1.15   | 0.56   | 0.06   | 6.05  | 6.29E-04 | -3.40 | 7.25E-02 | -2.58 | 3.94E-01 | EGA2-1 |
| ENSMMUG00000014829 |           |                                                        | 0.81   | 6.62   | 2.87   | 1.05   | 3.08  | 7.34E-03 | -1.44 | 2.65E-01 | -0.83 | 7.60E-01 | EGA2-1 |
| ENSMMUG00000019573 | TIMM8A    | Translocase Of Inner Mitochondrial Membrane 8A         | 0.11   | 2.47   | 4.17   | 1.97   | 4.28  | 4.16E-05 | 0.72  | 6.04E-01 | -0.91 | 6.96E-01 | EGA2-1 |
| ENSMMUG00000019580 | HNRNP2    | Heterogeneous Nuclear Ribonucleoprotein H2             | 23.44  | 59.35  | 95.58  | 68.11  | 1.41  | 1.48E-03 | 0.65  | 1.88E-01 | -0.27 | 8.03E-01 | EGA2-1 |
| ENSMMUG00000032387 | RPL10L    | Ribosomal Protein L10 Like                             | 44.71  | 273.74 | 208.02 | 142.02 | 2.70  | 3.20E-07 | -0.54 | 4.19E-01 | -0.24 | 8.79E-01 | EGA2-1 |
| ENSMMUG00000044358 | BEX2      | Brain Expressed X-linked 2                             | 0.26   | 2.03   | 0.83   | 0.85   | 3.15  | 2.68E-02 | -2.24 | 1.30E-01 | 0.36  | 9.36E-01 | EGA2-1 |
| ENSMMUG00000010501 | TCEAL9    | Transcription Elongation Factor A Like 9               | 2.17   | 37.51  | 17.06  | 17.95  | 3.96  | 5.38E-04 | -1.79 | 1.60E-01 | 0.54  | 8.60E-01 | EGA2-1 |
| ENSMMUG00000043071 |           |                                                        | 0.64   | 23.94  | 1.79   | 3.67   | 5.14  | 1.11E-02 | -0.79 | 7.70E-01 | -2.25 | 5.45E-01 | EGA2-1 |
| ENSMMUG00000032370 |           |                                                        | 6.66   | 70.82  | 69.97  | 76.85  | 3.63  | 9.11E-05 | -0.05 | 9.74E-01 | -0.03 | 9.94E-01 | EGA2-1 |
| ENSMMUG00000006377 | PLS3      | Plastin 3                                              | 2.07   | 9.55   | 6.41   | 5.40   | 2.34  | 3.65E-02 | -0.16 | 9.21E-01 | -0.77 | 7.55E-01 | EGA2-1 |
| ENSMMUG00000019534 | LOC711281 | Cancer/testis Antigen 47B like                         | 0.11   | 6.13   | 4.51   | 0.07   | 3.69  | 4.46E-02 | -3.63 | 6.43E-02 | -2.60 | 4.44E-01 | EGA2-1 |
| ENSMMUG00000022670 | NKRF      | NFKB Repressing Factor                                 | 0.26   | 7.85   | 14.02  | 8.05   | 5.14  | 1.04E-14 | 0.88  | 2.86E-01 | -0.94 | 4.68E-01 | EGA2-1 |
| ENSMMUG00000020222 | UPF3B     | UPF3B, Regulator Of Nonsense Mediated MRNA Decay       | 5.46   | 32.05  | 33.85  | 17.70  | 2.71  | 1.65E-05 | -0.41 | 6.32E-01 | 0.36  | 8.26E-01 | EGA2-1 |
| ENSMMUG00000032359 | NDUFA1    | NADH:ubiquinone Oxidoreductase Subunit A1              | 7.96   | 59.70  | 71.22  | 64.61  | 2.99  | 4.75E-03 | 0.79  | 5.46E-01 | -0.69 | 7.85E-01 | EGA2-1 |
| ENSMMUG00000040516 |           |                                                        | 0.05   | 5.86   | 6.17   | 0.12   | 11.14 | 3.06E-07 | -3.00 | 2.14E-01 | -3.22 | 3.93E-01 | EGA2-1 |
| ENSMMUG00000039784 |           |                                                        | 2.45   | 8.11   | 16.70  | 21.46  | 1.42  | 4.72E-03 | 0.72  | 1.91E-01 | 0.46  | 6.55E-01 | EGA2-1 |
| ENSMMUG00000043585 | STAG2     | Stromal Antigen 2                                      | 0.59   | 10.05  | 19.52  | 16.72  | 4.39  | 8.09E-07 | 0.53  | 6.71E-01 | 0.81  | 6.87E-01 | EGA2-1 |
| ENSMMUG00000008038 |           |                                                        | 23.43  | 69.64  | 59.64  | 43.01  | 1.57  | 9.00E-10 | -0.46 | 1.27E-01 | -0.23 | 7.01E-01 | EGA2-1 |
| ENSMMUG00000045878 | TEX13C    | TEX13 Family Member C                                  | 0.01   | 0.79   | 0.59   | 0.48   | 5.47  | 2.14E-04 | -1.62 | 3.33E-01 | 3.07  | 1.50E-01 | EGA2-1 |
| ENSMMUG00000020699 | ZDHHC9    | Zinc Finger DHHC-type Containing 9                     | 2.06   | 10.11  | 25.01  | 22.51  | 2.07  | 2.35E-02 | 0.99  | 3.31E-01 | -0.29 | 9.10E-01 | EGA2-1 |
| ENSMMUG00000008785 | ELF4      | E74 Like ETS Transcription Factor 4                    | 0.72   | 4.63   | 10.32  | 8.69   | 3.34  | 5.11E-04 | 0.53  | 6.88E-01 | 0.66  | 7.76E-01 | EGA2-1 |
| ENSMMUG00000032340 | LOC708995 | 60S Ribosomal Protein L23a Pseudogene                  | 133.43 | 564.98 | 470.79 | 402.58 | 2.10  | 4.88E-09 | -0.19 | 7.21E-01 | -0.23 | 8.05E-01 | EGA2-1 |

|                    |           |                                                               |        |         |         |        |       |          |       |          |       |          |        |
|--------------------|-----------|---------------------------------------------------------------|--------|---------|---------|--------|-------|----------|-------|----------|-------|----------|--------|
| ENSMMUG00000017881 | INTS6L    | Integrator Complex Subunit 6 Like                             | 0.07   | 2.87    | 11.45   | 4.80   | 6.12  | 9.02E-10 | 1.65  | 1.54E-01 | -0.88 | 7.01E-01 | EGA2-1 |
| ENSMMUG00000021984 | LOC710158 | Cancer/testis Antigen Family 45 Member A10-like               | 0.10   | 1.34    | 1.10    | 0.25   | 4.43  | 4.87E-02 | -2.30 | 3.52E-01 | -0.81 | 8.93E-01 | EGA2-1 |
| ENSMMUG00000040370 |           |                                                               | 5.90   | 32.40   | 34.07   | 37.01  | 2.34  | 1.28E-03 | 0.45  | 6.36E-01 | -0.96 | 4.61E-01 | EGA2-1 |
| ENSMMUG00000032331 |           |                                                               | 0.15   | 1.30    | 2.01    | 1.44   | 3.17  | 5.38E-06 | 0.89  | 2.76E-01 | -0.73 | 6.18E-01 | EGA2-1 |
| ENSMMUG00000039269 |           |                                                               | 0.68   | 4.44    | 5.54    | 3.12   | 1.95  | 2.62E-04 | -0.12 | 8.82E-01 | 0.47  | 6.92E-01 | EGA2-1 |
| ENSMMUG00000041712 |           |                                                               | 8.41   | 23.72   | 34.58   | 32.56  | 1.69  | 1.06E-03 | 0.17  | 8.16E-01 | -0.20 | 8.95E-01 | EGA2-1 |
| ENSMMUG00000039691 | FMR1NB    | FMR1 Neighbor                                                 | 0.03   | 10.97   | 3.08    | 3.50   | 7.73  | 1.73E-08 | -1.06 | 5.31E-01 | 1.12  | 7.21E-01 | EGA2-1 |
| ENSMMUG00000040274 | MAGEA4    | MAGE Family Member A4                                         | 0.06   | 37.82   | 13.99   | 5.78   | 10.19 | 3.82E-16 | -1.89 | 1.80E-01 | -0.64 | 8.51E-01 | EGA2-1 |
| ENSMMUG00000012826 |           |                                                               | 1.30   | 10.77   | 13.35   | 8.44   | 3.21  | 1.76E-04 | -0.60 | 5.92E-01 | -0.39 | 8.67E-01 | EGA2-1 |
| ENSMMUG00000041475 | DNASE1L1  | Deoxyribonuclease 1 Like 1                                    | 1.92   | 15.23   | 13.85   | 10.12  | 3.11  | 1.23E-09 | -0.49 | 4.60E-01 | 0.08  | 9.70E-01 | EGA2-1 |
| ENSMMUG00000045112 | LOC701606 | Cancer/testis Antigen 1                                       | 0.09   | 4.92    | 0.65    | 0.36   | 6.18  | 7.48E-04 | -3.47 | 6.87E-02 | -1.25 | 7.82E-01 | EGA2-1 |
| ENSMMUG00000031311 |           |                                                               | 0.30   | 6.07    | 6.73    | 8.79   | 4.47  | 4.26E-04 | 0.20  | 9.20E-01 | -0.05 | 9.93E-01 | EGA2-1 |
| ENSMMUG00000046403 | NIP7      | NIP7, Nucleolar Pre-rRNA Processing Protein                   | 0.42   | 15.20   | 9.44    | 2.72   | 6.69  | 8.64E-10 | -1.24 | 3.46E-01 | -1.12 | 6.25E-01 | EGA2-1 |
| ENSMMUG00000021991 | CCAR2     | Cell Cycle And Apoptosis Regulator 2                          | 2.47   | 10.24   | 4.74    | 4.42   | 2.48  | 1.75E-02 | -1.34 | 2.40E-01 | 0.01  | 9.99E-01 | EGA2-1 |
| ENSMMUG00000003348 | NEFL      | Neurofilament Light                                           | 1.62   | 18.13   | 10.92   | 10.06  | 2.72  | 1.35E-03 | 0.23  | 8.52E-01 | -0.97 | 5.43E-01 | EGA2-1 |
| ENSMMUG00000032525 | LOC711841 | Small Nuclear Ribonucleoprotein Sm D2 Pseudogene              | 4.22   | 34.98   | 35.77   | 40.94  | 3.00  | 2.23E-03 | 0.11  | 9.44E-01 | -0.34 | 9.07E-01 | EGA2-1 |
| ENSMMUG00000042420 | PNMA2     | PNMA Family Member 2                                          | 0.01   | 1.66    | 0.16    | 0.31   | 7.96  | 1.12E-03 | -2.53 | 3.64E-01 | -0.96 | 8.87E-01 | EGA2-1 |
| ENSMMUG00000007833 |           |                                                               | 15.88  | 31.41   | 41.10   | 46.69  | 1.03  | 1.83E-02 | 0.48  | 3.24E-01 | 0.02  | 9.88E-01 | EGA2-1 |
| ENSMMUG00000018860 |           |                                                               | 1.99   | 41.82   | 51.99   | 32.52  | 4.74  | 4.33E-09 | 0.29  | 8.15E-01 | -0.43 | 8.46E-01 | EGA2-1 |
| ENSMMUG00000010457 |           |                                                               | 305.64 | 1557.40 | 1453.19 | 983.96 | 1.91  | 2.94E-03 | 0.20  | 8.35E-01 | -0.76 | 5.24E-01 | EGA2-1 |
| ENSMMUG00000010244 | MAK16     | MAK16 Homolog                                                 | 4.96   | 38.13   | 47.47   | 22.89  | 2.70  | 4.40E-04 | 0.07  | 9.53E-01 | -0.13 | 9.64E-01 | EGA2-1 |
| ENSMMUG00000001635 | ZNF703    | Zinc Finger Protein 703                                       | 0.16   | 3.94    | 10.65   | 39.92  | 6.41  | 5.38E-10 | 0.28  | 8.53E-01 | 2.49  | 8.40E-02 | EGA2-1 |
| ENSMMUG00000000943 | ERLIN2    | ER Lipid Raft Associated 2                                    | 0.26   | 1.77    | 0.75    | 1.57   | 2.89  | 3.72E-02 | -2.08 | 1.52E-01 | 1.23  | 6.54E-01 | EGA2-1 |
| ENSMMUG00000038480 | EIF4EBP1  | Eukaryotic Translation Initiation Factor 4E Binding Protein 1 | 0.25   | 3.27    | 4.53    | 2.62   | 3.61  | 1.18E-03 | 0.83  | 5.51E-01 | -1.05 | 6.49E-01 | EGA2-1 |
| ENSMMUG00000013775 | BAG4      | BCL2 Associated Athanogene 4                                  | 1.20   | 8.58    | 11.63   | 4.36   | 2.68  | 6.10E-04 | 0.04  | 9.73E-01 | -0.18 | 9.49E-01 | EGA2-1 |
| ENSMMUG00000015989 | LOC702760 | 40S Ribosomal Protein S26-like                                | 200.71 | 1018.51 | 919.12  | 635.37 | 1.96  | 3.18E-03 | 0.10  | 9.26E-01 | -0.72 | 5.74E-01 | EGA2-1 |
| ENSMMUG00000020186 | SLC20A2   | Solute Carrier Family 20 Member 2                             | 0.10   | 0.64    | 0.55    | 0.96   | 3.01  | 2.86E-02 | 0.62  | 7.29E-01 | 0.29  | 9.50E-01 | EGA2-1 |
| ENSMMUG00000004089 |           |                                                               | 199.11 | 692.80  | 729.50  | 711.02 | 2.09  | 8.58E-17 | -0.12 | 7.44E-01 | -0.44 | 3.33E-01 | EGA2-1 |
| ENSMMUG00000016022 | TCEA1     | Transcription Elongation Factor A1                            | 2.32   | 15.22   | 28.55   | 23.84  | 2.66  | 1.28E-05 | 0.91  | 1.99E-01 | -0.05 | 9.82E-01 | EGA2-1 |
| ENSMMUG00000005478 | TGS1      | Trimethylguanosine Synthase 1                                 | 2.16   | 45.30   | 75.35   | 34.73  | 3.95  | 3.86E-09 | 1.13  | 1.49E-01 | -1.23 | 2.72E-01 | EGA2-1 |
| ENSMMUG00000046761 |           |                                                               | 0.21   | 2.24    | 0.89    | 2.74   | 2.82  | 2.06E-02 | -1.19 | 3.94E-01 | 1.69  | 3.96E-01 | EGA2-1 |
| ENSMMUG00000010354 | LOC698256 | Prothymosin Alpha-like                                        | 58.55  | 478.52  | 308.36  | 200.29 | 2.79  | 1.32E-06 | -0.50 | 5.09E-01 | -0.54 | 6.79E-01 | EGA2-1 |
| ENSMMUG00000008777 | ASPH      | Aspartate Beta-hydroxylase                                    | 6.05   | 11.44   | 14.90   | 15.62  | 1.27  | 3.28E-02 | 0.44  | 5.34E-01 | -0.52 | 6.61E-01 | EGA2-1 |
| ENSMMUG00000039310 |           |                                                               | 0.00   | 0.57    | 0.42    | 0.61   | 8.08  | 8.63E-03 | -5.47 | 7.92E-02 | 0.96  | 9.12E-01 | EGA2-1 |
| ENSMMUG00000012361 |           |                                                               | 0.26   | 5.17    | 3.73    | 3.53   | 4.20  | 2.15E-03 | -0.70 | 6.72E-01 | -0.18 | 9.69E-01 | EGA2-1 |
| ENSMMUG00000043699 |           |                                                               | 0.05   | 2.67    | 6.01    | 1.18   | 5.43  | 3.67E-02 | 2.77  | 3.11E-01 | -3.99 | 3.10E-01 | EGA2-1 |
| ENSMMUG00000002626 | ZFAND1    | Zinc Finger AN1-type Containing 1                             | 0.31   | 12.98   | 7.28    | 7.33   | 5.83  | 1.25E-05 | -1.80 | 2.48E-01 | 0.17  | 9.74E-01 | EGA2-1 |
| ENSMMUG00000006380 | E2F5      | E2F Transcription Factor 5                                    | 0.35   | 2.00    | 2.31    | 1.06   | 2.99  | 1.51E-02 | -2.21 | 8.26E-02 | 1.76  | 3.82E-01 | EGA2-1 |
| ENSMMUG00000006381 | C8H8orf59 | Chromosome 8 Open Reading Frame, Human C8orf59                | 5.48   | 54.33   | 80.21   | 51.90  | 3.06  | 3.97E-05 | 0.65  | 4.88E-01 | -0.19 | 9.45E-01 | EGA2-1 |
| ENSMMUG00000013396 | LRR69     | Leucine Rich Repeat Containing 69                             | 1.47   | 7.14    | 3.33    | 2.94   | 1.97  | 1.60E-02 | -1.09 | 2.21E-01 | 0.42  | 8.37E-01 | EGA2-1 |
| ENSMMUG00000042915 |           |                                                               | 0.09   | 24.74   | 65.95   | 31.73  | 7.58  | 1.62E-10 | 1.99  | 9.31E-02 | -0.79 | 7.68E-01 | EGA2-1 |
| ENSMMUG00000020073 | RPL30     | Ribosomal Protein L30                                         | 49.69  | 187.62  | 271.83  | 246.19 | 1.99  | 3.54E-09 | 0.62  | 1.08E-01 | -0.05 | 9.69E-01 | EGA2-1 |
| ENSMMUG00000018815 | KLF10     | Kruppel Like Factor 10                                        | 0.57   | 9.29    | 13.70   | 6.09   | 3.90  | 1.78E-08 | 0.58  | 5.29E-01 | -1.09 | 3.82E-01 | EGA2-1 |
| ENSMMUG0000001338  | AZIN1     | Antizyme Inhibitor 1                                          | 18.26  | 32.63   | 20.12   | 33.27  | 1.00  | 7.60E-03 | -0.66 | 9.50E-02 | 0.59  | 3.18E-01 | EGA2-1 |

|                     |           |                                                                          |        |         |         |        |      |          |       |          |       |          |        |
|---------------------|-----------|--------------------------------------------------------------------------|--------|---------|---------|--------|------|----------|-------|----------|-------|----------|--------|
| ENSMMUG00000023352  |           |                                                                          | 625.48 | 1690.46 | 1566.48 | 926.74 | 1.30 | 6.20E-05 | -0.20 | 6.45E-01 | -0.46 | 4.31E-01 | EGA2-1 |
| ENSMMUG00000020283  | EIF3H     | Eukaryotic Translation Initiation Factor 3 Subunit H                     | 17.72  | 56.80   | 47.90   | 43.04  | 1.75 | 2.79E-05 | -0.42 | 4.19E-01 | 0.06  | 9.72E-01 | EGA2-1 |
| ENSMMUG00000020284  | UTP23     | UTP23, Small Subunit Processome Component                                | 3.95   | 29.33   | 11.50   | 8.41   | 2.64 | 3.02E-03 | -0.93 | 3.78E-01 | 0.21  | 9.46E-01 | EGA2-1 |
| ENSMMUG00000014786  | LOC704510 | 60S Ribosomal Protein L29-like                                           | 8.35   | 42.86   | 61.89   | 51.93  | 2.40 | 2.26E-03 | -0.02 | 9.87E-01 | -0.60 | 7.33E-01 | EGA2-1 |
| ENSMMUG00000039387  |           |                                                                          | 0.02   | 0.78    | 0.51    | 0.17   | 4.79 | 1.08E-02 | -1.31 | 5.46E-01 | -0.11 | 9.87E-01 | EGA2-1 |
| ENSMMUG00000019646  | FAM91A1   | Family With Sequence Similarity 91 Member A1                             | 1.50   | 8.77    | 6.83    | 11.48  | 2.63 | 1.08E-04 | -0.03 | 9.78E-01 | 0.41  | 8.12E-01 | EGA2-1 |
| ENSMMUG00000003538  | WASHC5    | WASH Complex Subunit 5                                                   | 0.68   | 4.04    | 4.23    | 12.98  | 2.67 | 6.13E-03 | 0.07  | 9.64E-01 | 1.40  | 3.91E-01 | EGA2-1 |
| ENSMMUG00000003542  | NSMCE2    | NSE2/MMS21 Homolog, SMC5-SMC6 Complex SUMO Ligase                        | 3.03   | 17.32   | 6.56    | 6.19   | 2.79 | 6.23E-05 | -1.41 | 6.35E-02 | 0.69  | 6.44E-01 | EGA2-1 |
| ENSMMUG00000022452  | JRK       | Jrk Helix-turn-helix Protein                                             | 0.08   | 1.91    | 1.05    | 0.89   | 4.28 | 8.62E-04 | -0.96 | 5.52E-01 | 1.45  | 5.58E-01 | EGA2-1 |
| ENSMMUG00000042316  |           |                                                                          | 0.08   | 6.97    | 9.02    | 11.11  | 7.08 | 1.65E-05 | 0.41  | 8.55E-01 | 0.96  | 8.03E-01 | EGA2-1 |
| ENSMMUG00000016714  | ZNF623    | Zinc Finger Protein 623                                                  | 0.68   | 4.36    | 8.43    | 5.69   | 3.22 | 3.75E-03 | 0.39  | 8.04E-01 | -0.26 | 9.47E-01 | EGA2-1 |
| ENSMMUG00000013558  | PUF60     | Poly(U) Binding Splicing Factor 60                                       | 5.10   | 14.53   | 13.29   | 9.10   | 1.92 | 6.01E-03 | -0.08 | 9.44E-01 | -0.93 | 4.46E-01 | EGA2-1 |
| ENSMMUG00000007149  | CYC1      | Cytochrome C-1                                                           | 1.53   | 6.39    | 17.61   | 23.85  | 2.79 | 2.74E-03 | 1.33  | 1.95E-01 | 0.61  | 7.82E-01 | EGA2-1 |
| ENSMMUG00000014724  | BOP1      | Block Of Proliferation 1                                                 | 1.03   | 7.33    | 9.81    | 6.51   | 2.51 | 8.04E-03 | -0.05 | 9.73E-01 | -0.54 | 8.13E-01 | EGA2-1 |
| ENSMMUG00000007376  | ADCK5     | AarF Domain Containing Kinase 5                                          | 0.10   | 0.43    | 3.57    | 4.13   | 2.64 | 3.64E-02 | 2.00  | 1.08E-01 | 1.50  | 4.68E-01 | EGA2-1 |
| ENSMMUG00000013379  | RPL8      | Ribosomal Protein L8                                                     | 8.53   | 53.50   | 62.39   | 53.61  | 2.72 | 2.58E-14 | 0.13  | 8.11E-01 | -0.37 | 6.41E-01 | EGA2-1 |
| ENSMMUG00000011550  | ZNF7      | Zinc Finger Protein 7                                                    | 0.62   | 2.06    | 5.32    | 3.76   | 2.32 | 1.79E-02 | 1.16  | 2.85E-01 | -1.09 | 5.36E-01 | EGA2-1 |
| ENSMMUG00000016084  | LOC705607 | UPF0488 Protein C8orf33                                                  | 2.63   | 19.95   | 22.46   | 9.87   | 3.34 | 2.92E-04 | 0.24  | 8.65E-01 | -0.26 | 9.31E-01 | EGA2-1 |
| ENSMMUG00000007411  | ITFG2     | Integrin Alpha FG-GAP Repeat Containing 2                                | 0.53   | 3.45    | 7.17    | 6.59   | 2.99 | 5.73E-03 | 1.18  | 3.41E-01 | 0.52  | 8.52E-01 | EGA2-1 |
| ENSMMUG00000019385  | FOXM1     | Forkhead Box M1                                                          | 1.29   | 6.10    | 3.91    | 10.17  | 2.37 | 1.36E-02 | -0.51 | 6.80E-01 | 1.77  | 2.09E-01 | EGA2-1 |
| ENSMMUG00000011299  | TEAD4     | TEA Domain Transcription Factor 4                                        | 3.74   | 13.16   | 24.51   | 24.55  | 1.96 | 2.62E-02 | 0.85  | 3.97E-01 | 0.13  | 9.67E-01 | EGA2-1 |
| ENSMMUG00000046996  | LOC710558 | 40S Ribosomal Protein S15 Pseudogene                                     | 1.78   | 7.46    | 16.32   | 10.07  | 1.91 | 1.62E-02 | 0.61  | 5.18E-01 | 0.28  | 9.01E-01 | EGA2-1 |
| ENSMMUG00000020213  | LTBR      | Lymphotoxin Beta Receptor                                                | 0.16   | 0.62    | 1.38    | 1.21   | 2.56 | 1.85E-02 | 0.41  | 7.79E-01 | 1.05  | 6.17E-01 | EGA2-1 |
| ENSMMUG00000018676  | MRPL51    | Mitochondrial Ribosomal Protein L51                                      | 12.07  | 132.41  | 102.82  | 69.94  | 3.20 | 4.48E-06 | 0.01  | 9.96E-01 | -0.56 | 7.32E-01 | EGA2-1 |
| ENSMMUG00000018679  | GAPDH     | Glyceraldehyde-3-phosphate Dehydrogenase                                 | 40.74  | 122.84  | 210.32  | 369.86 | 1.90 | 4.30E-02 | 0.37  | 7.68E-01 | 0.19  | 9.51E-01 | EGA2-1 |
| ENSMMUG00000009583  | COPS7A    | COP9 Signalosome Subunit 7A                                              | 3.75   | 13.94   | 11.40   | 11.78  | 1.73 | 2.06E-02 | -0.37 | 7.04E-01 | -0.22 | 9.17E-01 | EGA2-1 |
| ENSMMUG00000010207  | EMG1      | EMG1, N1-specific Pseudouridine Methyltransferase                        | 0.92   | 29.02   | 35.96   | 20.02  | 4.95 | 3.08E-14 | 0.52  | 5.56E-01 | -0.95 | 4.43E-01 | EGA2-1 |
| ENSMMUG00000032159  |           |                                                                          | 0.07   | 18.60   | 5.91    | 2.05   | 5.99 | 5.79E-05 | -2.85 | 7.57E-02 | -2.59 | 2.88E-01 | EGA2-1 |
| ENSMMUG00000032158  | NANOG     | Nanog Homeobox                                                           | 1.14   | 14.41   | 31.55   | 47.22  | 3.13 | 4.16E-03 | 1.57  | 1.88E-01 | -0.46 | 8.76E-01 | EGA2-1 |
| ENSMMUG00000000439  | LOC715795 | Solute Carrier Family 2, Facilitated Glucose Transporter Member 3        | 1.35   | 51.37   | 58.32   | 42.99  | 5.15 | 5.08E-27 | 0.52  | 4.17E-01 | -0.68 | 4.73E-01 | EGA2-1 |
| ENSMMUG000000046124 | SLC2A3    | Solute Carrier Family 2 (facilitated Glucose Transporter), Member 3      | 0.66   | 224.91  | 257.79  | 183.61 | 8.21 | 2.72E-67 | 0.50  | 4.34E-01 | -0.67 | 4.95E-01 | EGA2-1 |
| ENSMMUG000000002191 | OLR1      | Oxidized Low Density Lipoprotein Receptor 1                              | 0.00   | 0.42    | 7.04    | 4.37   | 7.12 | 4.35E-04 | 3.72  | 6.08E-02 | -1.04 | 8.28E-01 | EGA2-1 |
| ENSMMUG000000002359 | MGST1     | Microsomal Glutathione S-transferase 1                                   | 0.15   | 1.15    | 0.82    | 1.32   | 4.25 | 3.53E-02 | -0.40 | 8.88E-01 | 1.55  | 7.17E-01 | EGA2-1 |
| ENSMMUG000000022174 | PIK3C2G   | Phosphatidylinositol-4-phosphate 3-kinase Catalytic Subunit Type 2 Gamma | 0.10   | 0.48    | 1.53    | 0.84   | 3.28 | 7.92E-03 | 0.45  | 7.93E-01 | 0.86  | 7.59E-01 | EGA2-1 |



|                    |             |                                                                 |        |        |        |        |      |          |       |          |       |          |        |
|--------------------|-------------|-----------------------------------------------------------------|--------|--------|--------|--------|------|----------|-------|----------|-------|----------|--------|
| ENSMMUG00000016243 | AEBP2       | AE Binding Protein 2                                            | 0.74   | 6.52   | 7.23   | 9.59   | 3.30 | 4.31E-06 | -0.26 | 8.07E-01 | 1.08  | 4.01E-01 | EGA2-1 |
| ENSMMUG00000010857 | RECQL       | RecQ Like Helicase                                              | 1.97   | 7.58   | 18.49  | 9.17   | 2.58 | 6.97E-03 | 0.67  | 5.72E-01 | -0.37 | 8.91E-01 | EGA2-1 |
| ENSMMUG00000038348 |             |                                                                 | 43.61  | 187.09 | 315.51 | 189.41 | 2.35 | 2.03E-11 | 0.67  | 1.00E-01 | -0.65 | 2.75E-01 | EGA2-1 |
| ENSMMUG00000006466 | INTS13      | Integrator Complex Subunit 13                                   | 1.72   | 5.82   | 16.36  | 11.55  | 1.83 | 1.53E-02 | 1.35  | 8.30E-02 | -0.10 | 9.72E-01 | EGA2-1 |
| ENSMMUG00000011806 |             |                                                                 | 23.16  | 88.04  | 132.49 | 84.53  | 1.82 | 1.65E-04 | 0.55  | 3.42E-01 | -0.39 | 7.26E-01 | EGA2-1 |
| ENSMMUG00000009155 |             |                                                                 | 35.49  | 187.12 | 158.01 | 146.25 | 2.34 | 3.63E-08 | -0.30 | 6.13E-01 | 0.06  | 9.69E-01 | EGA2-1 |
| ENSMMUG00000011452 | LOC698527   | 39S Ribosomal Protein L14, Mitochondrial                        | 3.76   | 44.12  | 38.48  | 16.54  | 4.68 | 5.28E-06 | -0.75 | 5.80E-01 | -0.53 | 8.51E-01 | EGA2-1 |
| ENSMMUG00000041539 |             |                                                                 | 111.09 | 595.75 | 451.74 | 340.26 | 2.30 | 6.42E-10 | -0.62 | 1.61E-01 | -0.27 | 7.72E-01 | EGA2-1 |
| ENSMMUG00000040338 |             |                                                                 | 7.82   | 65.18  | 105.40 | 72.83  | 3.02 | 1.79E-06 | 0.78  | 3.11E-01 | -0.18 | 9.32E-01 | EGA2-1 |
| ENSMMUG00000018935 | LOC705621   | 40S Ribosomal Protein S10 Pseudogene                            | 1.19   | 5.99   | 7.39   | 5.08   | 2.63 | 2.58E-04 | 0.08  | 9.47E-01 | -0.27 | 8.99E-01 | EGA2-1 |
| ENSMMUG00000032012 | LOC708147   | 40S Ribosomal Protein S25 Pseudogene                            | 103.21 | 281.70 | 324.47 | 231.19 | 1.24 | 4.64E-03 | 0.22  | 7.06E-01 | -0.36 | 6.99E-01 | EGA2-1 |
| ENSMMUG00000044706 | TUBA1B      | Tubulin, Alpha 1b                                               | 249.32 | 563.01 | 314.49 | 261.41 | 1.02 | 8.18E-03 | -0.65 | 1.09E-01 | -0.26 | 7.71E-01 | EGA2-1 |
| ENSMMUG00000032216 |             |                                                                 | 4.84   | 56.83  | 73.83  | 73.87  | 3.93 | 2.98E-17 | 0.38  | 5.57E-01 | -0.20 | 8.92E-01 | EGA2-1 |
| ENSMMUG00000016471 | CERS5       | Ceramide Synthase 5                                             | 0.78   | 21.36  | 13.50  | 5.82   | 4.68 | 2.02E-09 | -1.38 | 1.28E-01 | -0.26 | 9.17E-01 | EGA2-1 |
| ENSMMUG00000045923 |             |                                                                 | 2.36   | 15.88  | 27.42  | 15.89  | 2.46 | 7.63E-04 | 1.01  | 2.26E-01 | -0.71 | 6.36E-01 | EGA2-1 |
| ENSMMUG00000046801 | DENR        | Density Regulated Re-initiation And Release Factor              | 0.24   | 7.54   | 9.95   | 11.41  | 4.76 | 2.28E-10 | 0.64  | 5.26E-01 | 0.33  | 8.82E-01 | EGA2-1 |
| ENSMMUG00000004412 | RSRC2       | Arginine And Serine Rich Coiled-coil 2                          | 11.54  | 30.97  | 24.70  | 18.55  | 1.15 | 3.04E-03 | -0.16 | 7.58E-01 | -0.40 | 5.94E-01 | EGA2-1 |
| ENSMMUG00000005245 | ITGB7       | Integrin Subunit Beta 7                                         | 0.02   | 9.79   | 6.90   | 2.21   | 9.00 | 7.11E-15 | -0.38 | 8.26E-01 | -1.99 | 3.04E-01 | EGA2-1 |
| ENSMMUG00000022017 | RARG        | Retinoic Acid Receptor Gamma                                    | 0.01   | 1.15   | 0.30   | 0.05   | 6.69 | 3.61E-07 | -0.69 | 6.97E-01 | -2.98 | 1.31E-01 | EGA2-1 |
| ENSMMUG00000020036 | SP1         | Sp1 Transcription Factor                                        | 9.99   | 50.35  | 28.20  | 19.40  | 2.10 | 5.48E-04 | -0.94 | 1.69E-01 | -0.77 | 4.96E-01 | EGA2-1 |
| ENSMMUG00000017738 | PRR13       | Proline Rich 13                                                 | 2.84   | 21.49  | 32.69  | 25.48  | 3.17 | 6.73E-06 | 0.83  | 3.37E-01 | 0.19  | 9.37E-01 | EGA2-1 |
| ENSMMUG00000006608 | PCBP2       | Poly(rC) Binding Protein 2                                      | 50.84  | 145.53 | 112.97 | 67.47  | 1.64 | 1.23E-04 | -0.58 | 2.46E-01 | -0.94 | 1.34E-01 | EGA2-1 |
| ENSMMUG00000006613 | MAP3K12     | Mitogen-activated Protein Kinase Kinase Kinase 12               | 0.80   | 4.57   | 7.41   | 1.64   | 2.93 | 5.48E-03 | 0.26  | 8.68E-01 | -1.63 | 3.38E-01 | EGA2-1 |
| ENSMMUG00000031884 |             |                                                                 | 0.50   | 4.70   | 5.19   | 8.18   | 3.23 | 9.26E-03 | 0.00  | 9.99E-01 | 0.99  | 7.09E-01 | EGA2-1 |
| ENSMMUG00000011642 | SMUG1       | Single-strand-selective Monofunctional Uracil-DNA Glycosylase 1 | 0.26   | 2.89   | 1.16   | 6.04   | 3.30 | 3.80E-03 | -0.88 | 5.29E-01 | 2.59  | 1.01E-01 | EGA2-1 |
| ENSMMUG00000012989 | HNRNPA1     | Heterogeneous Nuclear Ribonucleoprotein A1                      | 113.48 | 336.05 | 341.52 | 345.86 | 1.62 | 6.26E-08 | 0.08  | 8.59E-01 | -0.23 | 7.57E-01 | EGA2-1 |
| ENSMMUG00000012992 | NFE2        | Nuclear Factor, Erythroid 2                                     | 0.03   | 3.43   | 3.21   | 1.22   | 6.54 | 7.31E-08 | -0.09 | 9.63E-01 | -1.58 | 4.93E-01 | EGA2-1 |
| ENSMMUG00000005182 | COPZ1       | Coatomer Protein Complex Subunit Zeta 1                         | 0.84   | 7.17   | 6.02   | 4.54   | 2.83 | 1.75E-03 | -0.10 | 9.44E-01 | -0.41 | 8.66E-01 | EGA2-1 |
| ENSMMUG00000020758 | LOC699166   | 40S Ribosomal Protein S26-like                                  | 33.48  | 140.34 | 137.95 | 101.17 | 1.80 | 1.45E-05 | 0.22  | 7.11E-01 | -0.56 | 4.69E-01 | EGA2-1 |
| ENSMMUG00000031840 | RPL41       | Ribosomal Protein L41                                           | 136.90 | 657.20 | 884.78 | 912.97 | 2.19 | 1.37E-07 | 0.71  | 1.39E-01 | -0.24 | 8.32E-01 | EGA2-1 |
| ENSMMUG00000003073 | NACA        | Nascent Polypeptide-associated Complex Alpha Subunit            | 4.45   | 17.92  | 30.58  | 29.95  | 2.17 | 5.15E-09 | 0.78  | 6.40E-02 | -0.13 | 9.14E-01 | EGA2-1 |
| ENSMMUG00000031818 | LOC715411   | Nucleolar Protein 56-like                                       | 2.56   | 49.43  | 55.54  | 31.42  | 4.13 | 5.25E-13 | 0.26  | 7.62E-01 | -0.58 | 6.53E-01 | EGA2-1 |
| ENSMMUG00000023694 | CDK4        | Cyclin Dependent Kinase 4                                       | 2.69   | 32.34  | 55.27  | 31.93  | 3.55 | 1.47E-05 | -0.26 | 8.36E-01 | 0.55  | 7.89E-01 | EGA2-1 |
| ENSMMUG00000007928 |             |                                                                 | 91.71  | 242.79 | 248.63 | 231.91 | 1.48 | 4.78E-06 | 0.02  | 9.69E-01 | -0.22 | 7.85E-01 | EGA2-1 |
| ENSMMUG00000000955 | USP15       | Ubiquitin Specific Peptidase 15                                 | 5.12   | 10.28  | 12.66  | 9.12   | 0.90 | 3.91E-02 | 0.27  | 6.07E-01 | -0.15 | 9.00E-01 | EGA2-1 |
| ENSMMUG00000020533 | C11H12orf56 | Chromosome 11 Open Reading Frame, Human C12orf56                | 0.06   | 1.31   | 1.55   | 2.57   | 5.25 | 1.20E-05 | -0.99 | 5.04E-01 | 0.64  | 8.32E-01 | EGA2-1 |
| ENSMMUG00000011650 | DYRK2       | Dual Specificity Tyrosine Phosphorylation Regulated Kinase 2    | 0.41   | 1.89   | 3.88   | 7.10   | 2.37 | 9.46E-04 | 1.32  | 8.60E-02 | 0.23  | 9.12E-01 | EGA2-1 |
| ENSMMUG00000002921 | CPSF6       | Cleavage And Polyadenylation Specific Factor 6                  | 4.46   | 14.68  | 13.65  | 17.28  | 1.49 | 3.88E-03 | 0.31  | 6.40E-01 | 0.21  | 8.81E-01 | EGA2-1 |

|                    |              |                                                                                  |        |         |         |        |      |          |       |          |       |          |        |
|--------------------|--------------|----------------------------------------------------------------------------------|--------|---------|---------|--------|------|----------|-------|----------|-------|----------|--------|
| ENSMMUG0000003556  |              |                                                                                  | 0.04   | 9.88    | 6.24    | 2.49   | 7.67 | 3.05E-07 | -0.82 | 6.54E-01 | 0.78  | 8.28E-01 | EGA2-1 |
| ENSMMUG00000011229 | LOC693516    | 60S Ribosomal Protein L35 Pseudogene                                             | 2.95   | 28.34   | 49.65   | 48.50  | 3.63 | 6.41E-09 | 1.25  | 7.00E-02 | -0.39 | 8.08E-01 | EGA2-1 |
| ENSMMUG00000018252 |              |                                                                                  | 47.85  | 120.94  | 133.40  | 120.68 | 1.18 | 3.84E-03 | 0.13  | 8.29E-01 | -0.13 | 9.12E-01 | EGA2-1 |
| ENSMMUG00000018254 | ZDHHC17      | Zinc Finger DHHC-type Containing 17                                              | 0.28   | 5.64    | 3.23    | 4.34   | 3.46 | 2.35E-03 | 0.17  | 9.24E-01 | -0.18 | 9.66E-01 | EGA2-1 |
| ENSMMUG00000017463 |              |                                                                                  | 708.96 | 1886.46 | 1774.61 | #####  | 1.30 | 8.95E-05 | -0.10 | 8.36E-01 | -0.55 | 3.24E-01 | EGA2-1 |
| ENSMMUG00000002513 |              |                                                                                  | 1.80   | 27.44   | 32.98   | 13.79  | 3.33 | 2.04E-03 | -0.01 | 9.95E-01 | -0.83 | 7.31E-01 | EGA2-1 |
| ENSMMUG00000007536 |              |                                                                                  | 109.17 | 245.56  | 289.57  | 227.49 | 1.17 | 2.34E-03 | 0.18  | 7.38E-01 | -0.46 | 5.19E-01 | EGA2-1 |
| ENSMMUG00000037648 | RBM3         | RNA Binding Motif Protein 3                                                      | 2.45   | 26.99   | 41.71   | 39.43  | 3.59 | 1.42E-04 | 0.33  | 8.14E-01 | 0.28  | 9.24E-01 | EGA2-1 |
| ENSMMUG00000015864 | TMTC3        | Transmembrane And Tetratricopeptide Repeat Containing 3                          | 1.42   | 9.79    | 14.04   | 13.42  | 2.82 | 1.23E-03 | 0.57  | 6.14E-01 | 0.11  | 9.74E-01 | EGA2-1 |
| ENSMMUG00000037667 |              |                                                                                  | 91.51  | 177.27  | 299.21  | 215.22 | 0.94 | 1.91E-02 | 0.76  | 6.12E-02 | -0.56 | 3.91E-01 | EGA2-1 |
| ENSMMUG00000007810 |              |                                                                                  | 53.45  | 241.24  | 176.54  | 151.06 | 2.22 | 6.08E-08 | -0.37 | 4.95E-01 | -0.24 | 8.28E-01 | EGA2-1 |
| ENSMMUG00000002244 | EEA1         | Early Endosome Antigen 1                                                         | 1.62   | 6.72    | 3.69    | 10.14  | 2.32 | 6.92E-04 | -1.27 | 8.43E-02 | 1.75  | 6.03E-02 | EGA2-1 |
| ENSMMUG00000044583 | LOC107000976 | NADH Dehydrogenase [ubiquinone] 1 Beta Subcomplex Subunit 11, Mitochondrial-like | 8.92   | 33.63   | 41.26   | 23.25  | 1.59 | 3.30E-02 | 0.46  | 6.12E-01 | -0.74 | 5.98E-01 | EGA2-1 |
| ENSMMUG00000013813 | METAP2       | Methionyl Aminopeptidase 2                                                       | 133.77 | 311.37  | 183.49  | 85.17  | 1.27 | 7.60E-03 | -0.87 | 8.32E-02 | -0.70 | 3.68E-01 | EGA2-1 |
| ENSMMUG00000022404 | APAF1        | Apoptotic Peptidase Activating Factor 1                                          | 0.48   | 3.20    | 4.23    | 4.81   | 2.67 | 9.57E-06 | 1.07  | 1.15E-01 | -0.37 | 8.12E-01 | EGA2-1 |
| ENSMMUG00000031613 | LOC700786    | Heterogeneous Nuclear Ribonucleoprotein A1-like                                  | 64.51  | 181.09  | 180.20  | 171.92 | 1.55 | 2.85E-07 | 0.01  | 9.89E-01 | -0.25 | 7.32E-01 | EGA2-1 |
| ENSMMUG00000012891 | UTP20        | UTP20, Small Subunit Processome Component                                        | 3.73   | 14.07   | 17.02   | 13.73  | 1.63 | 1.57E-02 | 0.73  | 3.38E-01 | -0.39 | 8.07E-01 | EGA2-1 |
| ENSMMUG00000012562 | GNPTAB       | N-acetylglucosamine-1-phosphate Transferase Alpha And Beta Subunits              | 3.04   | 17.16   | 43.41   | 17.43  | 2.38 | 9.21E-05 | 1.27  | 5.40E-02 | -0.90 | 4.03E-01 | EGA2-1 |
| ENSMMUG00000019832 |              |                                                                                  | 27.90  | 56.67   | 82.35   | 55.60  | 1.21 | 2.66E-03 | 0.23  | 6.60E-01 | -0.27 | 7.76E-01 | EGA2-1 |
| ENSMMUG00000012091 | TXNRD1       | Thioredoxin Reductase 1                                                          | 3.23   | 25.10   | 41.39   | 32.17  | 3.94 | 4.22E-08 | 0.91  | 3.05E-01 | -0.86 | 5.54E-01 | EGA2-1 |
| ENSMMUG00000003711 | TCP11L2      | T-complex 11 Like 2                                                              | 0.32   | 1.21    | 1.92    | 1.17   | 2.16 | 3.69E-02 | 0.32  | 8.22E-01 | -0.36 | 9.00E-01 | EGA2-1 |
| ENSMMUG00000006492 | ARPC3        | Actin Related Protein 2/3 Complex Subunit 3                                      | 25.91  | 58.83   | 93.86   | 89.40  | 1.31 | 1.36E-02 | 0.88  | 1.14E-01 | -0.20 | 8.93E-01 | EGA2-1 |
| ENSMMUG00000031551 |              |                                                                                  | 12.14  | 47.59   | 56.29   | 30.18  | 2.10 | 3.87E-02 | 0.17  | 9.06E-01 | -0.17 | 9.64E-01 | EGA2-1 |
| ENSMMUG00000033649 |              |                                                                                  | 0.02   | 5.51    | 1.16    | 2.80   | 5.98 | 1.29E-02 | -0.81 | 7.93E-01 | 1.86  | 6.96E-01 | EGA2-1 |
| ENSMMUG00000042632 |              |                                                                                  | 0.18   | 0.47    | 0.40    | 0.31   | 4.58 | 1.33E-02 | -2.49 | 2.11E-01 | 2.04  | 5.60E-01 | EGA2-1 |
| ENSMMUG00000013917 | NAA25        | N(alpha)-acetyltransferase 25, NatB Auxiliary Subunit                            | 1.09   | 8.90    | 10.00   | 11.18  | 2.57 | 4.00E-03 | 0.31  | 8.08E-01 | 1.18  | 4.47E-01 | EGA2-1 |
| ENSMMUG00000007433 | RPL6         | Ribosomal Protein L6                                                             | 17.40  | 73.67   | 124.27  | 130.30 | 2.07 | 2.95E-07 | 0.74  | 1.07E-01 | 0.11  | 9.38E-01 | EGA2-1 |
| ENSMMUG00000013253 | PTPN11       | Protein Tyrosine Phosphatase, Non-receptor Type 11                               | 2.28   | 9.12    | 14.15   | 18.28  | 1.89 | 2.22E-02 | 0.08  | 9.49E-01 | 0.68  | 6.91E-01 | EGA2-1 |
| ENSMMUG00000021795 | DDX54        | DEAD-box Helicase 54                                                             | 1.56   | 5.98    | 5.94    | 6.21   | 1.62 | 4.87E-03 | 0.02  | 9.84E-01 | 0.36  | 7.97E-01 | EGA2-1 |
| ENSMMUG00000001129 | RITA1        | RBPJ Interacting And Tubulin Associated 1                                        | 1.45   | 6.67    | 3.01    | 1.56   | 2.10 | 3.21E-02 | -0.97 | 3.81E-01 | -1.04 | 5.58E-01 | EGA2-1 |
| ENSMMUG00000021980 | LOC716888    | Ribosomal Protein L15-like                                                       | 48.24  | 138.67  | 210.55  | 198.67 | 1.63 | 5.50E-07 | 0.41  | 3.05E-01 | -0.24 | 7.62E-01 | EGA2-1 |
| ENSMMUG00000009157 | RPLP0        | Ribosomal Protein Lateral Stalk Subunit P0                                       | 35.03  | 145.79  | 150.37  | 242.48 | 1.91 | 2.16E-04 | 0.15  | 8.48E-01 | 0.11  | 9.53E-01 | EGA2-1 |
| ENSMMUG00000046684 | SIRT4        | Sirtuin 4                                                                        | 0.55   | 6.08    | 2.35    | 1.36   | 3.08 | 1.20E-03 | -1.56 | 1.37E-01 | -0.08 | 9.84E-01 | EGA2-1 |
| ENSMMUG00000046665 | GATC         | Glutamyl-tRNA Amidotransferase Subunit C                                         | 7.94   | 32.93   | 34.16   | 21.19  | 1.82 | 7.10E-03 | 0.62  | 4.42E-01 | -0.82 | 4.97E-01 | EGA2-1 |
| ENSMMUG00000011496 | SBNO1        | Strawberry Notch Homolog 1                                                       | 15.16  | 73.12   | 44.88   | 27.92  | 1.95 | 1.96E-06 | -0.49 | 3.30E-01 | -0.23 | 8.33E-01 | EGA2-1 |
| ENSMMUG00000013178 | DDX55        | DEAD-box Helicase 55                                                             | 4.35   | 17.80   | 12.59   | 4.71   | 2.12 | 2.33E-04 | -0.50 | 4.89E-01 | -0.88 | 3.72E-01 | EGA2-1 |
| ENSMMUG00000004592 | GTF2H3       | General Transcription Factor IIH Subunit 3                                       | 1.95   | 6.01    | 2.58    | 5.40   | 1.67 | 4.65E-02 | -0.87 | 3.46E-01 | 1.78  | 1.11E-01 | EGA2-1 |

|                      |           |                                                                                 |       |        |        |        |      |          |       |          |       |          |        |
|----------------------|-----------|---------------------------------------------------------------------------------|-------|--------|--------|--------|------|----------|-------|----------|-------|----------|--------|
| ENSMMUG00000017901   |           |                                                                                 | 1.01  | 21.06  | 7.69   | 8.36   | 4.67 | 5.10E-08 | -1.54 | 1.18E-01 | 0.35  | 8.93E-01 | EGA2-1 |
| ENSMMUG00000017902   | DHX37     | DEAH-box Helicase 37                                                            | 1.15  | 9.23   | 3.26   | 3.02   | 2.65 | 1.88E-03 | -1.74 | 5.21E-02 | 0.34  | 8.87E-01 | EGA2-1 |
| ENSMMUG00000020927   | RAN       | RAN, Member RAS Oncogene Family                                                 | 15.83 | 71.67  | 97.50  | 103.03 | 1.83 | 2.91E-03 | 0.72  | 3.12E-01 | 0.13  | 9.51E-01 | EGA2-1 |
| ENSMMUG00000009789   | ZNF10     | Zinc Finger Protein 10                                                          | 2.97  | 8.55   | 8.01   | 4.67   | 1.54 | 6.53E-03 | -0.32 | 6.66E-01 | -0.20 | 9.01E-01 | EGA2-1 |
| ENSMMUG00000001457   | ZNF605    | Zinc Finger Protein 605                                                         | 1.41  | 3.86   | 6.96   | 7.84   | 1.45 | 1.68E-02 | 1.16  | 5.90E-02 | 0.03  | 9.91E-01 | EGA2-1 |
| ENSMMUG000000043819  |           |                                                                                 | 0.04  | 1.14   | 1.60   | 1.11   | 5.62 | 8.01E-03 | -0.11 | 9.71E-01 | 0.67  | 9.05E-01 | EGA2-1 |
| ENSMMUG000000005282  |           |                                                                                 | 0.18  | 6.21   | 1.26   | 3.38   | 4.19 | 7.36E-03 | -0.85 | 6.68E-01 | 1.06  | 7.58E-01 | EGA2-1 |
| ENSMMUG000000010813  | GTPBP4    | GTP Binding Protein 4                                                           | 0.46  | 35.62  | 26.42  | 17.37  | 6.11 | 1.74E-13 | -0.27 | 8.35E-01 | 0.51  | 8.19E-01 | EGA2-1 |
| ENSMMUG000000006944  | GATA3     | GATA Binding Protein 3                                                          | 0.01  | 2.15   | 11.54  | 27.83  | 7.32 | 1.02E-06 | 1.24  | 4.60E-01 | 1.60  | 5.42E-01 | EGA2-1 |
| ENSMMUG000000008241  | UPF2      | UPF2, Regulator Of Nonsense Mediated MRNA Decay                                 | 16.53 | 32.77  | 31.48  | 16.25  | 1.19 | 3.22E-03 | -0.28 | 5.90E-01 | -0.70 | 2.65E-01 | EGA2-1 |
| ENSMMUG000000021233  | SEPHS1    | Selenophosphate Synthetase 1                                                    | 0.61  | 10.75  | 15.36  | 18.87  | 4.23 | 1.53E-05 | 0.66  | 6.14E-01 | 0.06  | 9.87E-01 | EGA2-1 |
| ENSMMUG000000007680  | NMT2      | N-myristoyltransferase 2                                                        | 2.52  | 13.27  | 12.41  | 9.35   | 2.28 | 2.28E-02 | -0.48 | 7.13E-01 | -0.24 | 9.40E-01 | EGA2-1 |
| ENSMMUG000000015286  | FAM171A1  | Family With Sequence Similarity 171 Member A1                                   | 0.48  | 2.74   | 3.44   | 2.15   | 2.82 | 1.83E-03 | -0.25 | 8.52E-01 | -0.04 | 9.91E-01 | EGA2-1 |
| ENSMMUG000000001700  | STAM      | Signal Transducing Adaptor Molecule                                             | 1.49  | 29.27  | 22.89  | 23.81  | 4.47 | 4.00E-13 | -0.38 | 6.64E-01 | 0.21  | 9.16E-01 | EGA2-1 |
| ENSMMUG000000007453  | ARL5B     | ADP Ribosylation Factor Like GTPase 5B                                          | 0.35  | 7.11   | 13.05  | 8.12   | 3.75 | 4.30E-04 | 1.53  | 2.02E-01 | -0.05 | 9.89E-01 | EGA2-1 |
| ENSMMUG000000000881  | BMI1      | BMI1 Proto-oncogene, Polycomb Ring Finger                                       | 0.70  | 5.38   | 10.93  | 12.31  | 3.33 | 4.75E-04 | 1.14  | 3.09E-01 | 0.48  | 8.51E-01 | EGA2-1 |
| ENSMMUG000000010070  |           |                                                                                 | 40.27 | 103.12 | 131.26 | 127.57 | 1.35 | 2.88E-04 | 0.54  | 2.10E-01 | -0.15 | 8.94E-01 | EGA2-1 |
| ENSMMUG000000022948  | LOC707383 | Amyloid Beta A4 Precursor Protein-binding Family B Member 1-interacting Protein | 0.01  | 1.14   | 1.21   | 2.04   | 4.64 | 2.75E-02 | 0.94  | 7.24E-01 | 2.89  | 3.84E-01 | EGA2-1 |
| ENSMMUG0000000045841 |           |                                                                                 | 12.21 | 61.09  | 28.55  | 22.81  | 1.73 | 2.73E-02 | -0.91 | 2.90E-01 | 0.47  | 8.00E-01 | EGA2-1 |
| ENSMMUG000000021559  | JCAD      | Junctional Cadherin 5 Associated                                                | 1.85  | 19.39  | 7.79   | 10.53  | 3.63 | 8.18E-05 | -0.89 | 4.35E-01 | 0.92  | 6.37E-01 | EGA2-1 |
| ENSMMUG000000004930  | MAP3K8    | Mitogen-activated Protein Kinase Kinase Kinase 8                                | 0.32  | 3.35   | 2.34   | 0.41   | 4.94 | 4.18E-05 | -0.30 | 8.69E-01 | -2.44 | 1.91E-01 | EGA2-1 |
| ENSMMUG000000002469  | CUL2      | Cullin 2                                                                        | 1.96  | 48.83  | 18.06  | 10.33  | 4.66 | 3.34E-09 | -1.07 | 2.65E-01 | -0.48 | 8.19E-01 | EGA2-1 |
| ENSMMUG0000000044393 |           |                                                                                 | 2.51  | 6.76   | 7.92   | 9.79   | 1.53 | 3.84E-02 | -0.03 | 9.79E-01 | 0.14  | 9.58E-01 | EGA2-1 |
| ENSMMUG000000020982  | HNRNPF    | Heterogeneous Nuclear Ribonucleoprotein F                                       | 42.84 | 71.59  | 61.82  | 57.47  | 0.90 | 9.32E-03 | -0.19 | 6.79E-01 | -0.11 | 9.17E-01 | EGA2-1 |
| ENSMMUG000000022436  | ZNF485    | Zinc Finger Protein 485                                                         | 0.11  | 2.27   | 2.26   | 1.30   | 3.88 | 7.45E-05 | 0.10  | 9.52E-01 | -0.50 | 8.51E-01 | EGA2-1 |
| ENSMMUG0000000043526 |           |                                                                                 | 4.13  | 31.03  | 48.84  | 35.32  | 2.56 | 3.10E-05 | 0.98  | 1.60E-01 | -0.29 | 8.63E-01 | EGA2-1 |
| ENSMMUG000000023637  |           |                                                                                 | 1.30  | 14.49  | 9.70   | 4.73   | 3.51 | 1.04E-03 | -1.20 | 3.41E-01 | -0.13 | 9.74E-01 | EGA2-1 |
| ENSMMUG000000013439  | FAM35A    | Family With Sequence Similarity 35 Member A                                     | 0.23  | 3.30   | 4.66   | 3.23   | 3.36 | 1.15E-04 | 0.46  | 7.02E-01 | -0.45 | 8.45E-01 | EGA2-1 |
| ENSMMUG0000000030571 |           |                                                                                 | 61.90 | 289.65 | 349.09 | 394.59 | 2.22 | 6.27E-09 | 0.42  | 3.86E-01 | -0.09 | 9.50E-01 | EGA2-1 |
| ENSMMUG000000004545  |           |                                                                                 | 20.34 | 107.76 | 157.59 | 142.55 | 2.44 | 1.27E-04 | 0.27  | 7.67E-01 | -0.65 | 6.25E-01 | EGA2-1 |
| ENSMMUG0000000048831 |           |                                                                                 | 14.41 | 26.81  | 36.65  | 28.40  | 1.13 | 4.81E-02 | 0.04  | 9.63E-01 | -0.20 | 9.00E-01 | EGA2-1 |
| ENSMMUG000000003015  | TMEM254   | Transmembrane Protein 254                                                       | 2.81  | 8.31   | 6.71   | 7.02   | 1.38 | 1.11E-02 | 0.04  | 9.64E-01 | 0.59  | 5.60E-01 | EGA2-1 |
| ENSMMUG0000000030563 | LOC702525 | 60S Ribosomal Protein L7a Pseudogene                                            | 10.39 | 33.48  | 23.77  | 27.85  | 1.84 | 1.62E-05 | -0.65 | 1.88E-01 | 0.07  | 9.67E-01 | EGA2-1 |
| ENSMMUG000000008690  | SAMD8     | Sterile Alpha Motif Domain Containing 8                                         | 0.88  | 3.32   | 4.94   | 3.02   | 2.73 | 3.66E-02 | 0.49  | 7.79E-01 | -1.09 | 6.79E-01 | EGA2-1 |
| ENSMMUG000000022976  | NDST2     | N-deacetylase And N-sulfotransferase 2                                          | 0.68  | 5.44   | 4.42   | 4.80   | 3.95 | 2.15E-06 | -0.82 | 4.36E-01 | 0.12  | 9.70E-01 | EGA2-1 |
| ENSMMUG000000011276  | NUDT13    | Nudix Hydrolase 13                                                              | 0.09  | 0.73   | 0.93   | 1.88   | 4.32 | 3.24E-04 | 0.61  | 6.91E-01 | 2.48  | 1.45E-01 | EGA2-1 |
| ENSMMUG0000000041960 |           |                                                                                 | 6.45  | 38.05  | 43.39  | 41.72  | 2.62 | 3.42E-05 | 0.04  | 9.68E-01 | 0.39  | 8.09E-01 | EGA2-1 |
| ENSMMUG000000010431  | DNAJB12   | DnaJ Heat Shock Protein Family (Hsp40) Member B12                               | 0.54  | 7.31   | 6.54   | 4.03   | 2.85 | 2.90E-02 | -0.10 | 9.62E-01 | -1.60 | 4.75E-01 | EGA2-1 |
| ENSMMUG000000006397  | PPA1      | Pyrophosphatase (inorganic) 1                                                   | 0.68  | 11.43  | 23.08  | 14.47  | 4.31 | 4.88E-07 | 1.19  | 2.48E-01 | 0.56  | 8.03E-01 | EGA2-1 |
| ENSMMUG000000015302  | HK1       | Hexokinase 1                                                                    | 0.34  | 7.45   | 13.63  | 16.27  | 4.78 | 1.12E-09 | 1.52  | 8.78E-02 | -0.42 | 8.46E-01 | EGA2-1 |

|                    |           |                                                              |        |         |        |        |      |          |       |          |       |          |        |
|--------------------|-----------|--------------------------------------------------------------|--------|---------|--------|--------|------|----------|-------|----------|-------|----------|--------|
| ENSMMUG0000004101  | VPS26A    | VPS26, Retromer Complex Component A                          | 2.44   | 25.80   | 28.20  | 21.12  | 2.63 | 1.08E-04 | 0.18  | 8.60E-01 | 0.37  | 8.38E-01 | EGA2-1 |
| ENSMMUG0000001005  | DDX21     | DExD-box Helicase 21                                         | 2.02   | 45.76   | 36.77  | 24.88  | 4.48 | 8.04E-12 | -0.31 | 7.49E-01 | -0.59 | 7.02E-01 | EGA2-1 |
| ENSMMUG00000016652 | CCAR1     | Cell Division Cycle And Apoptosis Regulator 1                | 31.73  | 79.19   | 54.97  | 39.68  | 1.18 | 3.96E-03 | -0.34 | 4.89E-01 | -0.25 | 7.99E-01 | EGA2-1 |
| ENSMMUG00000030531 | SIRT1     | Sirtuin 1                                                    | 1.31   | 31.03   | 48.72  | 36.32  | 5.16 | 6.56E-20 | 0.59  | 4.31E-01 | -0.42 | 7.76E-01 | EGA2-1 |
| ENSMMUG00000030465 | LOC696151 | 60S Ribosomal Protein L6 Pseudogene                          | 58.45  | 264.70  | 412.25 | 415.15 | 2.15 | 5.08E-07 | 0.68  | 1.73E-01 | 0.02  | 9.93E-01 | EGA2-1 |
| ENSMMUG00000008755 | LOC696785 | 60S Ribosomal Protein L26                                    | 11.05  | 50.04   | 71.95  | 60.93  | 2.17 | 3.49E-07 | 0.66  | 1.88E-01 | 0.03  | 9.86E-01 | EGA2-1 |
| ENSMMUG00000017726 | NRBF2     | Nuclear Receptor Binding Factor 2                            | 1.06   | 63.17   | 111.24 | 53.18  | 6.25 | 3.05E-24 | 0.98  | 1.94E-01 | -1.23 | 2.36E-01 | EGA2-1 |
| ENSMMUG00000042150 | MRLN      | Myoregulin                                                   | 0.03   | 12.88   | 3.70   | 4.09   | 9.57 | 2.46E-09 | -2.52 | 1.08E-01 | 0.35  | 9.47E-01 | EGA2-1 |
| ENSMMUG00000019829 | TFAM      | Transcription Factor A, Mitochondrial                        | 1.51   | 100.14  | 241.20 | 134.38 | 5.99 | 2.78E-11 | 0.66  | 5.95E-01 | -0.09 | 9.81E-01 | EGA2-1 |
| ENSMMUG00000042906 |           |                                                              | 0.11   | 2.36    | 1.73   | 2.04   | 5.63 | 3.17E-03 | -1.64 | 4.50E-01 | 2.42  | 4.59E-01 | EGA2-1 |
| ENSMMUG00000048720 |           |                                                              | 258.25 | 1063.51 | 945.44 | 861.69 | 2.06 | 1.13E-08 | -0.08 | 8.90E-01 | -0.23 | 8.11E-01 | EGA2-1 |
| ENSMMUG00000007475 |           |                                                              | 78.20  | 219.79  | 209.34 | 138.36 | 1.63 | 7.06E-06 | -0.49 | 2.57E-01 | -0.03 | 9.84E-01 | EGA2-1 |
| ENSMMUG00000044322 | FGFBP3    | Fibroblast Growth Factor Binding Protein 3                   | 0.03   | 1.74    | 0.16   | 0.41   | 8.40 | 6.55E-07 | -3.25 | 6.73E-02 | 1.42  | 7.08E-01 | EGA2-1 |
| ENSMMUG00000017627 | BTA1      | B-TFIID TATA-box Binding Protein Associated Factor 1         | 0.70   | 13.12   | 8.95   | 9.27   | 4.17 | 1.82E-12 | -0.13 | 8.91E-01 | 0.17  | 9.33E-01 | EGA2-1 |
| ENSMMUG00000038680 |           |                                                              | 0.05   | 0.65    | 0.57   | 0.50   | 4.62 | 6.45E-03 | -1.03 | 6.14E-01 | -1.37 | 6.95E-01 | EGA2-1 |
| ENSMMUG00000015124 | LOC699639 | X-ray Repair Cross-complementing Protein 6-like              | 0.66   | 3.60    | 1.88   | 2.05   | 2.33 | 5.31E-04 | -0.90 | 2.47E-01 | -0.38 | 8.28E-01 | EGA2-1 |
| ENSMMUG00000040417 |           |                                                              | 42.55  | 178.98  | 180.22 | 131.97 | 2.13 | 3.64E-05 | 0.19  | 8.08E-01 | -0.80 | 3.72E-01 | EGA2-1 |
| ENSMMUG00000017255 | HELLS     | Helicase, Lymphoid Specific                                  | 8.41   | 18.32   | 19.22  | 20.95  | 1.37 | 5.40E-03 | -0.49 | 3.93E-01 | 0.46  | 6.38E-01 | EGA2-1 |
| ENSMMUG00000019634 | RRP12     | Ribosomal RNA Processing 12 Homolog                          | 1.44   | 8.96    | 8.34   | 4.90   | 2.24 | 1.77E-03 | 0.16  | 8.83E-01 | -0.56 | 7.31E-01 | EGA2-1 |
| ENSMMUG00000020027 | LOC694418 | Phosphoglycerate Mutase 1 (brain)-like                       | 3.73   | 30.53   | 54.07  | 83.01  | 2.65 | 3.30E-04 | 1.14  | 1.67E-01 | 0.19  | 9.38E-01 | EGA2-1 |
| ENSMMUG00000020029 | ZDHHC16   | Zinc Finger DHHC-type Containing 16                          | 1.83   | 4.85    | 3.61   | 2.10   | 2.68 | 1.92E-02 | -0.79 | 5.71E-01 | -1.37 | 4.99E-01 | EGA2-1 |
| ENSMMUG00000010281 | R3HCC1L   | R3H Domain And Coiled-coil Containing 1 Like                 | 0.54   | 8.97    | 4.61   | 4.65   | 4.04 | 5.48E-07 | -0.28 | 8.18E-01 | 0.45  | 8.37E-01 | EGA2-1 |
| ENSMMUG00000023760 | SLC25A28  | Solute Carrier Family 25 Member 28                           | 0.41   | 5.19    | 2.04   | 2.61   | 4.46 | 3.77E-05 | -2.10 | 7.69E-02 | 0.04  | 9.92E-01 | EGA2-1 |
| ENSMMUG00000015519 |           |                                                              | 0.53   | 2.82    | 4.69   | 3.95   | 2.39 | 7.37E-03 | 0.65  | 5.52E-01 | -0.48 | 8.28E-01 | EGA2-1 |
| ENSMMUG00000040838 |           |                                                              | 37.98  | 94.15   | 134.11 | 145.33 | 1.28 | 5.30E-03 | 0.56  | 2.81E-01 | -0.21 | 8.62E-01 | EGA2-1 |
| ENSMMUG00000041804 |           |                                                              | 10.39  | 60.99   | 101.53 | 90.08  | 2.63 | 1.35E-09 | 0.60  | 2.57E-01 | 0.19  | 8.83E-01 | EGA2-1 |
| ENSMMUG00000009374 | HPS6      | HPS6, Biogenesis Of Lysosomal Organelles Complex 2 Subunit 3 | 0.04   | 0.63    | 0.52   | 1.25   | 4.65 | 2.64E-02 | -0.16 | 9.60E-01 | -0.79 | 8.83E-01 | EGA2-1 |
| ENSMMUG00000001183 | NOLC1     | Nucleolar And Coiled-body Phosphoprotein 1                   | 21.49  | 68.65   | 36.88  | 35.90  | 1.48 | 2.90E-04 | -0.82 | 6.18E-02 | -0.34 | 7.07E-01 | EGA2-1 |
| ENSMMUG00000017596 | WBP1L     | WW Domain Binding Protein 1 Like                             | 0.97   | 3.25    | 4.27   | 3.73   | 1.92 | 4.82E-02 | 0.36  | 7.83E-01 | -0.20 | 9.51E-01 | EGA2-1 |
| ENSMMUG00000003749 | NT5C2     | 5'-nucleotidase, Cytosolic II                                | 1.19   | 8.05    | 10.52  | 18.19  | 2.56 | 1.63E-03 | 0.66  | 5.16E-01 | 0.72  | 6.80E-01 | EGA2-1 |
| ENSMMUG00000007058 | PDCD11    | Programmed Cell Death 11                                     | 3.57   | 10.64   | 11.72  | 8.81   | 1.61 | 1.55E-02 | 0.19  | 8.43E-01 | -0.23 | 9.04E-01 | EGA2-1 |
| ENSMMUG00000015338 | ITPRIP    | Inositol 1,4,5-trisphosphate Receptor Interacting Protein    | 0.04   | 0.44    | 0.21   | 0.61   | 5.78 | 2.07E-03 | -1.38 | 5.32E-01 | 2.39  | 4.54E-01 | EGA2-1 |
| ENSMMUG00000048676 |           |                                                              | 0.34   | 2.14    | 4.38   | 7.31   | 2.04 | 2.57E-02 | 1.34  | 1.59E-01 | 0.83  | 6.41E-01 | EGA2-1 |
| ENSMMUG00000007982 | SMC3      | Structural Maintenance Of Chromosomes 3                      | 24.60  | 46.54   | 37.11  | 29.09  | 0.75 | 2.97E-02 | -0.17 | 7.09E-01 | -0.13 | 8.95E-01 | EGA2-1 |
| ENSMMUG00000041417 |           |                                                              | 0.11   | 5.37    | 8.01   | 5.10   | 8.32 | 3.41E-05 | 1.02  | 6.79E-01 | -1.08 | 8.19E-01 | EGA2-1 |
| ENSMMUG00000023480 | IKZF5     | IKAROS Family Zinc Finger 5                                  | 0.67   | 8.13    | 5.95   | 4.11   | 3.66 | 2.12E-06 | -1.60 | 6.13E-02 | 0.52  | 7.91E-01 | EGA2-1 |
| ENSMMUG00000022032 | CTBP2     | C-terminal Binding Protein 2                                 | 1.18   | 8.23    | 8.39   | 5.01   | 2.76 | 1.18E-06 | 0.26  | 7.58E-01 | -1.13 | 2.14E-01 | EGA2-1 |

|                    |             |                                                            |       |        |        |        |      |          |       |          |       |          |        |
|--------------------|-------------|------------------------------------------------------------|-------|--------|--------|--------|------|----------|-------|----------|-------|----------|--------|
| ENSMMUG00000044121 | MKI67       | Marker Of Proliferation Ki67                               | 10.63 | 68.90  | 91.30  | 94.97  | 2.45 | 2.77E-05 | 0.49  | 5.18E-01 | 0.57  | 6.52E-01 | EGA2-1 |
| ENSMMUG00000011511 | PSMD13      | Proteasome 26S Subunit, Non-ATPase 13                      | 3.79  | 20.98  | 13.16  | 18.32  | 2.25 | 9.00E-04 | -0.63 | 4.46E-01 | 0.73  | 5.84E-01 | EGA2-1 |
| ENSMMUG00000020627 | RPLP2       | Ribosomal Protein Lateral Stalk Subunit P2                 | 17.26 | 83.29  | 142.81 | 113.01 | 2.33 | 1.50E-06 | 0.46  | 4.54E-01 | 0.25  | 8.53E-01 | EGA2-1 |
| ENSMMUG00000043328 | CD151       | CD151 Molecule (Raph Blood Group)                          | 0.63  | 3.30   | 2.76   | 4.45   | 2.96 | 1.27E-04 | -0.88 | 3.43E-01 | 0.57  | 7.54E-01 | EGA2-1 |
| ENSMMUG00000013772 | TSSC4       | Tumor Suppressing Subtransferable Candidate 4              | 0.30  | 0.59   | 1.26   | 0.56   | 2.89 | 2.30E-02 | 1.21  | 3.97E-01 | -2.12 | 2.59E-01 | EGA2-1 |
| ENSMMUG00000016213 | PPP6R3      | Protein Phosphatase 6 Regulatory Subunit 3                 | 6.06  | 12.91  | 14.16  | 16.14  | 0.93 | 1.33E-02 | 0.16  | 7.61E-01 | 0.60  | 3.03E-01 | EGA2-1 |
| ENSMMUG00000047060 |             |                                                            | 0.05  | 0.52   | 0.57   | 0.89   | 3.81 | 3.53E-02 | -0.23 | 9.23E-01 | 1.31  | 7.07E-01 | EGA2-1 |
| ENSMMUG00000018526 | NDUFV1      | NADH:ubiquinone Oxidoreductase Core Subunit V1             | 0.70  | 3.40   | 3.09   | 6.41   | 2.62 | 2.83E-02 | -1.53 | 2.36E-01 | 1.64  | 4.00E-01 | EGA2-1 |
| ENSMMUG00000005483 | RPS6KB2     | Ribosomal Protein S6 Kinase B2                             | 0.55  | 11.30  | 11.37  | 6.28   | 4.51 | 5.94E-06 | -0.33 | 8.28E-01 | -0.77 | 7.45E-01 | EGA2-1 |
| ENSMMUG00000018731 |             |                                                            | 5.92  | 61.26  | 117.85 | 65.05  | 3.28 | 3.59E-05 | 0.93  | 3.31E-01 | -1.19 | 3.98E-01 | EGA2-1 |
| ENSMMUG00000019837 |             |                                                            | 0.07  | 1.40   | 2.09   | 1.64   | 5.05 | 7.70E-03 | -2.73 | 1.73E-01 | 2.51  | 4.50E-01 | EGA2-1 |
| ENSMMUG00000019839 | KAT5        | Lysine Acetyltransferase 5                                 | 0.74  | 5.58   | 5.31   | 3.35   | 3.16 | 1.53E-04 | -0.38 | 7.48E-01 | 0.09  | 9.78E-01 | EGA2-1 |
| ENSMMUG00000044084 | SSSCA1      | Sjogren Syndrome/scleroderma Autoantigen 1                 | 0.56  | 6.31   | 3.37   | 2.29   | 3.49 | 1.39E-03 | -0.80 | 5.60E-01 | -0.98 | 6.70E-01 | EGA2-1 |
| ENSMMUG00000019165 | TIGD3       | Tigger Transposable Element Derived 3                      | 0.02  | 4.97   | 6.63   | 3.34   | 8.49 | 3.01E-07 | -0.76 | 7.34E-01 | -0.64 | 8.92E-01 | EGA2-1 |
| ENSMMUG00000018776 | FAU         | FAU, Ubiquitin Like And Ribosomal Protein S30 Fusion       | 6.50  | 168.78 | 110.26 | 117.12 | 4.42 | 7.70E-12 | -0.64 | 4.47E-01 | -0.03 | 9.92E-01 | EGA2-1 |
| ENSMMUG00000018775 | ZNHIT2      | Zinc Finger HIT-type Containing 2                          | 0.58  | 3.10   | 1.83   | 1.93   | 3.14 | 3.80E-02 | -1.29 | 4.59E-01 | 1.23  | 6.91E-01 | EGA2-1 |
| ENSMMUG00000003973 | ATG2A       | Autophagy Related 2A                                       | 1.06  | 17.35  | 33.50  | 11.45  | 3.49 | 3.43E-05 | 1.31  | 1.78E-01 | -1.86 | 1.39E-01 | EGA2-1 |
| ENSMMUG00000037770 | CATSPERZ    | Catsper Channel Auxiliary Subunit Zeta                     | 0.17  | 0.52   | 0.89   | 1.93   | 6.15 | 2.24E-03 | 1.09  | 6.35E-01 | 2.46  | 4.29E-01 | EGA2-1 |
| ENSMMUG00000020354 | SLC3A2      | Solute Carrier Family 3 Member 2                           | 0.58  | 11.81  | 12.76  | 7.33   | 4.09 | 1.37E-09 | 0.28  | 7.80E-01 | -0.64 | 6.78E-01 | EGA2-1 |
| ENSMMUG00000018779 | WDR74       | WD Repeat Domain 74                                        | 1.65  | 16.09  | 10.61  | 4.36   | 3.47 | 2.82E-04 | -0.70 | 5.69E-01 | -1.72 | 2.56E-01 | EGA2-1 |
| ENSMMUG00000042851 |             |                                                            | 5.25  | 30.26  | 38.56  | 46.51  | 2.56 | 1.44E-04 | 0.45  | 6.07E-01 | 0.03  | 9.91E-01 | EGA2-1 |
| ENSMMUG00000013950 | UQCC3       | Ubiquinol-cytochrome C Reductase Complex Assembly Factor 3 | 0.34  | 12.50  | 7.74   | 9.99   | 4.96 | 2.13E-05 | 0.56  | 7.29E-01 | -0.98 | 7.11E-01 | EGA2-1 |
| ENSMMUG00000046328 | CSKMT       | Citrate Synthase Lysine Methyltransferase                  | 0.04  | 19.22  | 5.03   | 5.00   | 8.18 | 3.11E-11 | -1.63 | 2.27E-01 | -0.21 | 9.64E-01 | EGA2-1 |
| ENSMMUG00000013949 | C14H11orf98 | Chromosome 14 C11orf98 Homolog                             | 2.88  | 68.71  | 64.11  | 38.07  | 4.25 | 3.16E-07 | 0.29  | 8.17E-01 | -0.13 | 9.69E-01 | EGA2-1 |
| ENSMMUG00000018117 | GANAB       | Glucosidase II Alpha Subunit                               | 3.33  | 15.66  | 20.84  | 21.91  | 2.04 | 2.71E-04 | 0.71  | 2.79E-01 | -0.34 | 8.09E-01 | EGA2-1 |
| ENSMMUG00000018110 | MTA2        | Metastasis Associated 1 Family Member 2                    | 7.50  | 51.67  | 19.26  | 24.00  | 2.97 | 7.97E-05 | -1.39 | 9.36E-02 | 0.63  | 7.13E-01 | EGA2-1 |
| ENSMMUG00000020911 |             |                                                            | 2.24  | 9.79   | 9.60   | 15.42  | 2.10 | 4.20E-03 | -0.46 | 6.26E-01 | 0.09  | 9.73E-01 | EGA2-1 |
| ENSMMUG00000015280 | CPSF7       | Cleavage And Polyadenylation Specific Factor 7             | 1.15  | 9.88   | 18.37  | 12.54  | 2.89 | 2.49E-05 | 1.23  | 1.08E-01 | -0.52 | 7.51E-01 | EGA2-1 |
| ENSMMUG00000042208 |             |                                                            | 0.46  | 3.13   | 6.73   | 5.52   | 3.87 | 4.57E-04 | 0.93  | 4.76E-01 | 1.47  | 4.46E-01 | EGA2-1 |
| ENSMMUG00000038007 | CLP1        | Cleavage And Polyadenylation Factor I Subunit 1            | 0.30  | 5.08   | 3.94   | 2.11   | 4.16 | 1.95E-06 | -0.14 | 9.21E-01 | -1.03 | 5.54E-01 | EGA2-1 |
| ENSMMUG00000018443 |             |                                                            | 14.05 | 58.83  | 109.61 | 59.65  | 2.25 | 6.32E-08 | 0.76  | 1.11E-01 | -0.88 | 1.78E-01 | EGA2-1 |
| ENSMMUG00000017810 | SSRP1       | Structure Specific Recognition Protein 1                   | 8.89  | 35.38  | 34.97  | 24.14  | 1.90 | 2.24E-04 | 0.22  | 7.64E-01 | -0.94 | 2.45E-01 | EGA2-1 |
| ENSMMUG00000017809 | TNKS1BP1    | Tankyrase 1 Binding Protein 1                              | 0.15  | 3.58   | 1.07   | 1.79   | 4.13 | 1.37E-06 | -1.21 | 2.34E-01 | 0.56  | 7.99E-01 | EGA2-1 |
| ENSMMUG00000005864 | LOC712404   | Prothymosin Alpha-like                                     | 75.82 | 652.35 | 381.93 | 273.97 | 2.73 | 4.79E-07 | -0.50 | 4.79E-01 | -0.40 | 7.64E-01 | EGA2-1 |

|                    |              |                                                        |        |         |        |        |      |          |       |          |       |          |        |
|--------------------|--------------|--------------------------------------------------------|--------|---------|--------|--------|------|----------|-------|----------|-------|----------|--------|
| ENSMMUG0000004286  | PTPMT1       | Protein Tyrosine Phosphatase, Mitochondrial 1          | 2.46   | 11.62   | 21.68  | 12.20  | 2.70 | 2.61E-02 | -0.34 | 8.42E-01 | 0.54  | 8.62E-01 | EGA2-1 |
| ENSMMUG00000015611 | PSMC3        | Proteasome 26S Subunit, ATPase3                        | 3.31   | 37.04   | 51.02  | 39.28  | 3.21 | 1.19E-04 | 0.55  | 6.21E-01 | 0.13  | 9.69E-01 | EGA2-1 |
| ENSMMUG00000043299 |              |                                                        | 11.26  | 44.96   | 63.06  | 70.80  | 2.26 | 4.47E-03 | 0.67  | 4.82E-01 | -0.22 | 9.31E-01 | EGA2-1 |
| ENSMMUG00000019672 | ATG13        | Autophagy Related 13                                   | 3.95   | 22.66   | 6.77   | 12.25  | 2.74 | 4.92E-03 | -1.86 | 6.77E-02 | 0.32  | 9.11E-01 | EGA2-1 |
| ENSMMUG00000042106 |              |                                                        | 16.07  | 46.55   | 46.67  | 38.52  | 1.45 | 9.25E-03 | 0.10  | 9.05E-01 | 0.10  | 9.61E-01 | EGA2-1 |
| ENSMMUG00000019988 | HIPK3        | Homeodomain Interacting Protein Kinase 3               | 2.35   | 13.14   | 13.96  | 10.94  | 2.60 | 2.96E-07 | -0.40 | 5.57E-01 | 0.36  | 7.79E-01 | EGA2-1 |
| ENSMMUG00000042442 |              |                                                        | 4.55   | 33.19   | 35.00  | 37.37  | 2.68 | 3.65E-03 | -0.98 | 3.65E-01 | 1.46  | 3.30E-01 | EGA2-1 |
| ENSMMUG00000019329 | SPTY2D1      | SPT2 Chromatin Protein Domain Containing 1             | 1.71   | 17.91   | 11.89  | 7.81   | 3.04 | 1.55E-11 | -0.43 | 4.74E-01 | -0.52 | 5.83E-01 | EGA2-1 |
| ENSMMUG00000031024 | LDHA         | Lactate Dehydrogenase A                                | 12.48  | 139.60  | 198.84 | 160.61 | 3.47 | 2.28E-06 | 0.72  | 4.43E-01 | -0.48 | 7.97E-01 | EGA2-1 |
| ENSMMUG00000016443 | LOC701246    | Cytochrome C-like                                      | 16.54  | 53.20   | 93.67  | 54.17  | 1.31 | 4.46E-02 | 1.15  | 7.97E-02 | -0.67 | 5.69E-01 | EGA2-1 |
| ENSMMUG00000011438 | CTR9         | CTR9 Homolog, Paf1/RNA Polymerase II Complex Component | 3.99   | 16.07   | 17.58  | 12.32  | 1.55 | 1.74E-03 | 0.68  | 2.21E-01 | -0.89 | 2.47E-01 | EGA2-1 |
| ENSMMUG00000008759 | WEE1         | WEE1 G2 Checkpoint Kinase                              | 0.20   | 1.36    | 2.77   | 8.57   | 3.08 | 4.54E-03 | 1.04  | 4.11E-01 | 1.41  | 4.50E-01 | EGA2-1 |
| ENSMMUG00000021828 | LOC698197    | 60S Ribosomal Protein L27a-like                        | 18.56  | 194.86  | 262.60 | 284.93 | 3.72 | 8.22E-20 | 0.56  | 2.82E-01 | -0.06 | 9.69E-01 | EGA2-1 |
| ENSMMUG00000015010 | EIF3F        | Eukaryotic Translation Initiation Factor 3 Subunit F   | 33.37  | 76.15   | 68.10  | 67.01  | 1.40 | 1.17E-02 | -0.44 | 5.12E-01 | 0.07  | 9.71E-01 | EGA2-1 |
| ENSMMUG00000017420 |              |                                                        | 281.67 | 986.81  | 975.71 | 963.34 | 2.15 | 1.64E-14 | -0.28 | 4.49E-01 | -0.32 | 6.00E-01 | EGA2-1 |
| ENSMMUG00000043656 |              |                                                        | 317.77 | 1167.28 | 982.81 | 818.76 | 2.05 | 2.50E-14 | -0.42 | 2.03E-01 | -0.37 | 4.85E-01 | EGA2-1 |
| ENSMMUG00000007732 | TIMM10B      | Translocase Of Inner Mitochondrial Membrane 10B        | 0.93   | 16.43   | 15.61  | 12.05  | 3.85 | 3.58E-04 | 0.62  | 6.68E-01 | -1.21 | 5.62E-01 | EGA2-1 |
| ENSMMUG00000007731 | ARFIP2       | ADP Ribosylation Factor Interacting Protein 2          | 0.62   | 3.27    | 2.42   | 3.35   | 2.11 | 2.02E-02 | 0.30  | 8.14E-01 | -0.88 | 6.14E-01 | EGA2-1 |
| ENSMMUG00000003962 | RRM1         | Ribonucleotide Reductase Catalytic Subunit M1          | 8.84   | 68.61   | 51.74  | 30.27  | 2.62 | 7.15E-05 | 0.03  | 9.79E-01 | -0.92 | 4.40E-01 | EGA2-1 |
| ENSMMUG00000031809 | LOC100430401 | Heterogeneous Nuclear Ribonucleoprotein A1-like        | 69.28  | 207.06  | 260.46 | 212.01 | 1.71 | 1.94E-06 | 0.38  | 4.06E-01 | -0.34 | 6.77E-01 | EGA2-1 |
| ENSMMUG00000037753 | LOC100423378 | Peptidyl-prolyl Cis-trans Isomerase A Pseudogene       | 37.41  | 212.88  | 362.97 | 385.42 | 2.67 | 3.13E-05 | 0.93  | 2.10E-01 | 0.72  | 5.75E-01 | EGA2-1 |
| ENSMMUG00000014680 | MRPL48       | Mitochondrial Ribosomal Protein L48                    | 0.31   | 1.20    | 2.15   | 2.87   | 2.65 | 1.72E-02 | -0.08 | 9.64E-01 | 0.48  | 8.67E-01 | EGA2-1 |
| ENSMMUG00000044011 |              |                                                        | 4.77   | 22.22   | 29.36  | 28.13  | 2.43 | 2.70E-02 | -0.14 | 9.31E-01 | -0.21 | 9.58E-01 | EGA2-1 |
| ENSMMUG00000017529 | ARRB1        | Arrestin Beta 1                                        | 0.47   | 3.43    | 2.96   | 10.39  | 3.39 | 4.95E-03 | -1.03 | 4.79E-01 | 2.58  | 1.29E-01 | EGA2-1 |
| ENSMMUG00000009019 | RPS3         | Ribosomal Protein S3                                   | 71.07  | 217.53  | 372.73 | 402.89 | 1.77 | 9.87E-05 | 0.67  | 2.05E-01 | 0.25  | 8.34E-01 | EGA2-1 |
| ENSMMUG00000038487 | SINHCAF      | SIN3-HDAC Complex Associated Factor                    | 13.84  | 67.47   | 72.18  | 59.30  | 1.98 | 9.97E-04 | 0.43  | 5.74E-01 | -0.33 | 8.32E-01 | EGA2-1 |
| ENSMMUG00000010119 | AAMDC        | Adipogenesis Associated Mth938 Domain Containing       | 1.39   | 26.17   | 11.50  | 4.15   | 5.44 | 3.52E-08 | -1.49 | 2.02E-01 | -1.26 | 5.15E-01 | EGA2-1 |
| ENSMMUG00000010120 | INTS4        | Integrator Complex Subunit 4                           | 3.30   | 12.98   | 10.68  | 7.16   | 2.15 | 1.18E-03 | -1.06 | 1.48E-01 | 0.12  | 9.62E-01 | EGA2-1 |
| ENSMMUG00000040993 | RPS2         | Ribosomal Protein S2                                   | 51.11  | 242.05  | 298.83 | 264.27 | 2.58 | 2.45E-07 | 0.23  | 7.57E-01 | -0.40 | 7.39E-01 | EGA2-1 |
| ENSMMUG00000040614 | CCDC89       | Coiled-coil Domain Containing 89                       | 0.24   | 1.35    | 1.50   | 1.80   | 2.11 | 2.00E-02 | -0.48 | 6.81E-01 | 1.40  | 3.24E-01 | EGA2-1 |
| ENSMMUG00000019617 | CCDC83       | Coiled-coil Domain Containing 83                       | 0.00   | 0.15    | 0.46   | 2.85   | 4.65 | 3.09E-02 | 1.89  | 4.01E-01 | 1.92  | 6.15E-01 | EGA2-1 |
| ENSMMUG00000019621 | EED          | Embryonic Ectoderm Development                         | 0.20   | 8.97    | 10.49  | 6.88   | 6.10 | 3.77E-12 | 0.23  | 8.69E-01 | 0.15  | 9.66E-01 | EGA2-1 |
| ENSMMUG00000012596 | FOLH1B       | Folate Hydrolase 1B                                    | 0.00   | 0.20    | 0.33   | 0.99   | 6.75 | 2.29E-03 | -0.26 | 9.34E-01 | 3.99  | 1.81E-01 | EGA2-1 |
| ENSMMUG00000005207 | NAALAD2      | N-acetylated Alpha-linked Acidic Dipeptidase 2         | 0.03   | 0.19    | 1.11   | 2.14   | 3.56 | 2.03E-02 | 2.30  | 1.20E-01 | 0.14  | 9.77E-01 | EGA2-1 |

|                      |            |                                                                        |        |        |        |        |      |          |       |          |       |          |        |
|----------------------|------------|------------------------------------------------------------------------|--------|--------|--------|--------|------|----------|-------|----------|-------|----------|--------|
| ENSMMUG0000005209    | CHORDC1    | Cysteine And Histidine Rich Domain Containing 1                        | 9.11   | 91.18  | 93.48  | 60.68  | 3.05 | 9.76E-05 | 0.37  | 7.37E-01 | -0.76 | 6.47E-01 | EGA2-1 |
| ENSMMUG00000011646   | TAF1D      | TATA-box Binding Protein Associated Factor, RNA Polymerase I Subunit D | 5.55   | 66.73  | 49.35  | 52.01  | 3.16 | 1.99E-08 | -0.33 | 6.83E-01 | 0.41  | 7.72E-01 | EGA2-1 |
| ENSMMUG00000007639   | SRSF8      | Serine/arginine-rich Splicing Factor 8                                 | 0.64   | 8.18   | 6.06   | 4.23   | 4.48 | 1.10E-06 | 0.18  | 9.01E-01 | -1.08 | 5.60E-01 | EGA2-1 |
| ENSMMUG00000003821   | JRKL       | JRK Like                                                               | 0.25   | 2.94   | 5.60   | 2.55   | 4.25 | 1.09E-04 | 0.70  | 6.33E-01 | 0.10  | 9.81E-01 | EGA2-1 |
| ENSMMUG000000038443  |            |                                                                        | 0.03   | 19.41  | 8.79   | 9.43   | 8.79 | 3.87E-12 | -1.03 | 4.51E-01 | -0.75 | 7.89E-01 | EGA2-1 |
| ENSMMUG00000005437   | ALKBH8     | Alkylated DNA Repair Protein AlkB Homolog 8                            | 0.29   | 10.04  | 8.62   | 9.38   | 4.58 | 8.97E-05 | 0.84  | 5.79E-01 | -0.33 | 9.32E-01 | EGA2-1 |
| ENSMMUG00000000797   | EXPH5      | Exophilin 5                                                            | 0.40   | 4.21   | 3.97   | 13.85  | 4.09 | 2.22E-06 | 0.05  | 9.72E-01 | 1.38  | 3.54E-01 | EGA2-1 |
| ENSMMUG000000043523  |            |                                                                        | 31.48  | 99.03  | 114.63 | 66.25  | 1.81 | 6.55E-04 | -0.07 | 9.34E-01 | -0.36 | 7.78E-01 | EGA2-1 |
| ENSMMUG00000012270   | RBM7       | RNA Binding Motif Protein 7                                            | 2.08   | 21.58  | 13.05  | 14.19  | 3.31 | 1.43E-12 | -0.42 | 4.99E-01 | -0.39 | 7.30E-01 | EGA2-1 |
| ENSMMUG000000045582  |            |                                                                        | 22.25  | 77.96  | 151.53 | 139.59 | 1.75 | 1.22E-02 | 1.21  | 9.54E-02 | -0.43 | 7.92E-01 | EGA2-1 |
| ENSMMUG000000016894  | RPS25      | Ribosomal Protein S25                                                  | 149.88 | 386.28 | 492.11 | 339.15 | 1.29 | 1.17E-03 | 0.38  | 4.29E-01 | -0.51 | 4.79E-01 | EGA2-1 |
| ENSMMUG000000048946  |            |                                                                        | 17.81  | 65.72  | 96.64  | 75.32  | 1.74 | 2.21E-03 | 0.59  | 3.79E-01 | -0.46 | 7.10E-01 | EGA2-1 |
| ENSMMUG000000041875  | PUS3       | Pseudouridylate Synthase 3                                             | 0.34   | 7.36   | 4.29   | 3.15   | 3.81 | 2.81E-07 | -1.18 | 1.74E-01 | 0.75  | 6.38E-01 | EGA2-1 |
| ENSMMUG000000043833  |            |                                                                        | 4.51   | 18.20  | 29.73  | 32.18  | 2.04 | 2.67E-02 | 0.61  | 5.86E-01 | 0.06  | 9.86E-01 | EGA2-1 |
| ENSMMUG000000049111  |            |                                                                        | 0.61   | 5.70   | 0.65   | 5.58   | 4.46 | 7.57E-03 | -3.26 | 5.99E-02 | 2.77  | 2.85E-01 | EGA2-1 |
| ENSMMUG000000009615  | IMP4       | IMP4, U3 Small Nucleolar Ribonucleoprotein                             | 5.23   | 37.42  | 26.00  | 22.92  | 2.91 | 4.09E-05 | -0.37 | 7.09E-01 | -0.03 | 9.92E-01 | EGA2-1 |
| ENSMMUG000000041125  |            |                                                                        | 2.97   | 8.53   | 8.73   | 17.77  | 1.89 | 1.54E-02 | -0.86 | 3.27E-01 | 1.46  | 1.99E-01 | EGA2-1 |
| ENSMMUG000000018568  | MAP3K2     | Mitogen-activated Protein Kinase Kinase Kinase 2                       | 1.04   | 3.42   | 6.99   | 8.69   | 1.70 | 3.45E-02 | 1.15  | 1.75E-01 | 0.78  | 6.05E-01 | EGA2-1 |
| ENSMMUG000000020928  | NIFK       | Nucleolar Protein Interacting With The FHA Domain Of MKI67             | 73.59  | 183.86 | 133.31 | 52.92  | 1.20 | 2.75E-02 | -0.66 | 2.68E-01 | -1.15 | 1.21E-01 | EGA2-1 |
| ENSMMUG000000041625  | LOC707182  | 60S Ribosomal Protein L7a Pseudogene                                   | 14.48  | 45.53  | 34.71  | 41.50  | 1.78 | 1.40E-04 | -0.53 | 3.43E-01 | 0.04  | 9.81E-01 | EGA2-1 |
| ENSMMUG000000047258  |            |                                                                        | 76.22  | 204.88 | 152.36 | 75.43  | 1.45 | 1.36E-03 | -0.42 | 4.48E-01 | -0.82 | 2.41E-01 | EGA2-1 |
| ENSMMUG000000017486  | MCM6       | Minichromosome Maintenance Complex Component 6                         | 12.59  | 41.70  | 37.47  | 29.36  | 1.72 | 1.74E-05 | 0.06  | 9.23E-01 | -0.53 | 4.86E-01 | EGA2-1 |
| ENSMMUG000000003032  |            |                                                                        | 3.47   | 11.98  | 9.19   | 9.04   | 1.71 | 7.23E-04 | 0.01  | 9.90E-01 | -0.08 | 9.67E-01 | EGA2-1 |
| ENSMMUG000000000043  | ORC4       | Origin Recognition Complex Subunit 4                                   | 0.97   | 4.83   | 4.96   | 4.18   | 1.74 | 4.14E-02 | 0.19  | 8.74E-01 | 0.59  | 7.51E-01 | EGA2-1 |
| ENSMMUG000000004825  |            |                                                                        | 2.74   | 30.52  | 30.16  | 30.49  | 3.58 | 3.53E-07 | 0.08  | 9.49E-01 | -0.33 | 8.72E-01 | EGA2-1 |
| ENSMMUG000000044103  |            |                                                                        | 1.36   | 5.75   | 5.81   | 10.50  | 2.14 | 1.26E-03 | 0.08  | 9.44E-01 | 0.51  | 7.37E-01 | EGA2-1 |
| ENSMMUG0000000031396 |            |                                                                        | 15.51  | 78.87  | 125.67 | 127.97 | 2.62 | 1.73E-04 | 0.74  | 3.79E-01 | 0.67  | 6.49E-01 | EGA2-1 |
| ENSMMUG000000007313  | HAT1       | Histone Acetyltransferase 1                                            | 11.36  | 60.09  | 117.26 | 45.86  | 1.77 | 3.46E-02 | 1.56  | 6.27E-02 | -1.54 | 1.97E-01 | EGA2-1 |
| ENSMMUG000000010554  |            |                                                                        | 3.70   | 25.93  | 51.31  | 71.76  | 2.06 | 3.41E-02 | 1.40  | 1.67E-01 | -0.25 | 9.34E-01 | EGA2-1 |
| ENSMMUG000000031373  | LOC697561  | 40S Ribosomal Protein SA-like                                          | 3.89   | 13.03  | 22.50  | 23.64  | 2.13 | 7.61E-04 | 0.70  | 3.50E-01 | 0.16  | 9.38E-01 | EGA2-1 |
| ENSMMUG000000001858  | HNRNPA3    | Heterogeneous Nuclear Ribonucleoprotein A3                             | 7.42   | 62.95  | 117.90 | 73.01  | 2.95 | 1.02E-06 | 1.10  | 1.08E-01 | -0.39 | 8.03E-01 | EGA2-1 |
| ENSMMUG000000031343  | LOC711449  | 60S Ribosomal Protein L18 Pseudogene                                   | 1.98   | 7.72   | 14.04  | 15.46  | 2.15 | 4.13E-04 | 0.89  | 1.94E-01 | 0.20  | 9.12E-01 | EGA2-1 |
| ENSMMUG000000019335  | LOC709201  | 60S Ribosomal Protein L3-like                                          | 21.75  | 180.97 | 106.97 | 127.57 | 3.14 | 1.14E-07 | -0.99 | 1.53E-01 | 0.64  | 6.13E-01 | EGA2-1 |
| ENSMMUG000000003260  |            |                                                                        | 22.88  | 65.77  | 37.52  | 43.55  | 1.32 | 5.89E-03 | -0.86 | 8.88E-02 | 0.18  | 8.95E-01 | EGA2-1 |
| ENSMMUG000000011937  |            |                                                                        | 21.76  | 182.76 | 292.92 | 184.48 | 3.03 | 4.80E-07 | 0.66  | 3.79E-01 | -0.27 | 8.75E-01 | EGA2-1 |
| ENSMMUG000000005612  | GLS        | Glutaminase                                                            | 1.76   | 5.11   | 3.53   | 2.68   | 1.87 | 1.20E-02 | -0.67 | 4.41E-01 | 0.07  | 9.78E-01 | EGA2-1 |
| ENSMMUG000000041535  | C12H2orf69 | Chromosome 12 Open Reading Frame, Human C2orf69                        | 0.38   | 4.59   | 9.29   | 12.77  | 3.35 | 2.44E-04 | 1.26  | 2.28E-01 | 0.13  | 9.71E-01 | EGA2-1 |
| ENSMMUG000000022202  | BZW1       | Basic Leucine Zipper And W2 Domains 1                                  | 7.39   | 108.95 | 102.01 | 55.37  | 3.77 | 4.92E-16 | -0.26 | 7.02E-01 | -0.17 | 9.07E-01 | EGA2-1 |

|                    |           |                                                    |        |         |         |        |       |          |       |          |       |          |        |
|--------------------|-----------|----------------------------------------------------|--------|---------|---------|--------|-------|----------|-------|----------|-------|----------|--------|
| ENSMMUG00000006638 | PPIL3     | Peptidylprolyl Isomerase Like 3                    | 0.70   | 3.52    | 5.35    | 6.55   | 2.19  | 9.20E-03 | 0.34  | 7.67E-01 | 0.63  | 7.33E-01 | EGA2-1 |
| ENSMMUG00000006639 | NIF3L1    | NGG1 Interacting Factor 3 Like 1                   | 5.33   | 19.28   | 23.66   | 18.28  | 1.40  | 4.23E-02 | 0.51  | 5.29E-01 | -0.31 | 8.59E-01 | EGA2-1 |
| ENSMMUG00000039733 |           |                                                    | 1.61   | 3.62    | 2.38    | 3.10   | 1.48  | 4.23E-02 | -1.37 | 6.07E-02 | 1.20  | 2.66E-01 | EGA2-1 |
| ENSMMUG00000000582 | NOP58     | NOP58 Ribonucleoprotein                            | 38.65  | 153.07  | 131.93  | 106.93 | 1.61  | 1.80E-04 | 0.13  | 8.36E-01 | -0.30 | 7.72E-01 | EGA2-1 |
| ENSMMUG00000006818 | LOC695847 | Chromobox Protein Homolog 3-like                   | 7.99   | 84.92   | 157.65  | 61.37  | 3.25  | 4.88E-08 | 1.27  | 5.71E-02 | -1.01 | 3.24E-01 | EGA2-1 |
| ENSMMUG00000013359 | SLC11A1   | Solute Carrier Family 11 Member 1                  | 0.07   | 1.15    | 1.44    | 0.38   | 5.52  | 1.59E-03 | -0.46 | 8.56E-01 | -0.06 | 9.93E-01 | EGA2-1 |
| ENSMMUG00000014510 | ANKZF1    | Ankyrin Repeat And Zinc Finger Domain Containing 1 | 1.07   | 9.08    | 3.92    | 7.28   | 3.05  | 2.27E-03 | -0.71 | 5.75E-01 | 0.58  | 8.14E-01 | EGA2-1 |
| ENSMMUG00000029426 |           |                                                    | 2.23   | 9.23    | 4.80    | 5.50   | 2.55  | 2.06E-02 | -1.13 | 3.72E-01 | 0.41  | 9.00E-01 | EGA2-1 |
| ENSMMUG00000011773 | HTR2B     | 5-hydroxytryptamine Receptor 2B                    | 0.35   | 2.48    | 1.44    | 1.87   | 2.90  | 2.12E-02 | -0.31 | 8.60E-01 | 0.56  | 8.61E-01 | EGA2-1 |
| ENSMMUG00000018094 | NCL       | Nucleolin                                          | 170.92 | 1209.05 | 2143.44 | 956.08 | 2.73  | 1.38E-08 | 0.95  | 8.37E-02 | -1.04 | 1.70E-01 | EGA2-1 |
| ENSMMUG00000012140 | LOC693785 | Prothymosin Alpha-like                             | 38.28  | 327.66  | 216.93  | 160.52 | 2.80  | 3.13E-08 | -0.35 | 6.10E-01 | -0.34 | 7.98E-01 | EGA2-1 |
| ENSMMUG00000006985 |           |                                                    | 0.02   | 1.42    | 0.63    | 1.37   | 7.26  | 1.07E-03 | -1.80 | 4.88E-01 | 1.04  | 8.53E-01 | EGA2-1 |
| ENSMMUG00000041959 | EFHD1     | EF-hand Domain Family Member D1                    | 0.03   | 0.24    | 1.75    | 1.06   | 3.33  | 2.45E-02 | 2.82  | 5.23E-02 | -0.44 | 9.15E-01 | EGA2-1 |
| ENSMMUG00000044208 |           |                                                    | 0.00   | 0.73    | 1.06    | 0.38   | 27.07 | 3.74E-13 | -0.53 | 9.33E-01 | -4.15 | 5.99E-01 | EGA2-1 |
| ENSMMUG00000008049 | DTYMK     | Deoxythymidylate Kinase                            | 0.29   | 3.11    | 4.90    | 7.45   | 4.67  | 2.63E-03 | 1.23  | 4.65E-01 | 1.00  | 7.59E-01 | EGA2-1 |
| ENSMMUG00000019609 | DPH7      | Diphthamide Biosynthesis 7                         | 0.27   | 3.23    | 1.24    | 1.77   | 3.26  | 3.71E-02 | -0.65 | 7.47E-01 | 2.32  | 3.33E-01 | EGA2-1 |
| ENSMMUG00000039736 | MRPL41    | Mitochondrial Ribosomal Protein L41                | 2.52   | 13.45   | 9.88    | 7.97   | 2.62  | 2.37E-02 | -0.97 | 4.75E-01 | -0.73 | 7.85E-01 | EGA2-1 |
| ENSMMUG00000012164 | TUBB4B    | Tubulin Beta 4B Class IVb                          | 3.31   | 62.18   | 63.87   | 50.85  | 4.39  | 3.39E-11 | -0.02 | 9.87E-01 | -0.33 | 8.63E-01 | EGA2-1 |
| ENSMMUG00000038102 |           |                                                    | 0.00   | 0.16    | 1.46    | 0.59   | 19.51 | 3.61E-03 | -3.99 | 6.46E-01 | -6.64 | 6.18E-01 | EGA2-1 |
| ENSMMUG00000005047 | PHPT1     | Phosphohistidine Phosphatase 1                     | 2.79   | 34.60   | 6.68    | 8.26   | 2.65  | 4.45E-02 | -2.09 | 1.21E-01 | -0.02 | 9.97E-01 | EGA2-1 |
| ENSMMUG00000044767 | FAM69B    | Family With Sequence Similarity 69 Member B        | 0.60   | 1.42    | 3.47    | 4.76   | 1.97  | 3.65E-02 | 0.75  | 4.92E-01 | 0.10  | 9.74E-01 | EGA2-1 |
| ENSMMUG00000003098 | PMPCA     | Peptidase, Mitochondrial Processing Alpha Subunit  | 0.80   | 7.32    | 11.95   | 9.85   | 2.85  | 2.07E-03 | 0.55  | 6.49E-01 | 0.73  | 7.21E-01 | EGA2-1 |
| ENSMMUG00000015461 | PPP1R26   | Protein Phosphatase 1 Regulatory Subunit 26        | 0.34   | 1.58    | 2.00    | 1.96   | 2.92  | 3.66E-02 | -0.62 | 7.33E-01 | 0.81  | 8.03E-01 | EGA2-1 |
| ENSMMUG00000019308 |           |                                                    | 0.02   | 8.09    | 3.62    | 1.49   | 6.56  | 4.31E-04 | -0.31 | 9.10E-01 | -0.55 | 9.30E-01 | EGA2-1 |
| ENSMMUG00000022341 | RPL7A     | Ribosomal Protein L7a                              | 98.51  | 335.53  | 269.84  | 275.56 | 1.90  | 1.06E-05 | -0.43 | 4.32E-01 | -0.03 | 9.86E-01 | EGA2-1 |
| ENSMMUG00000040875 |           |                                                    | 0.63   | 26.88   | 23.79   | 10.82  | 5.57  | 2.68E-10 | -0.79 | 4.94E-01 | -0.32 | 9.07E-01 | EGA2-1 |
| ENSMMUG00000001267 | GTF3C5    | General Transcription Factor IIIC Subunit 5        | 8.81   | 25.25   | 27.60   | 9.99   | 1.64  | 6.28E-03 | -0.10 | 9.11E-01 | -1.53 | 5.03E-02 | EGA2-1 |
| ENSMMUG00000041056 |           |                                                    | 3.42   | 58.79   | 8.07    | 22.15  | 3.40  | 4.63E-03 | -2.10 | 1.05E-01 | 0.99  | 7.11E-01 | EGA2-1 |
| ENSMMUG00000042881 | AIF1L     | Allograft Inflammatory Factor 1 Like               | 1.16   | 17.28   | 6.91    | 23.64  | 3.83  | 1.54E-03 | -0.75 | 6.34E-01 | 1.95  | 3.19E-01 | EGA2-1 |
| ENSMMUG00000003793 | TOR1B     | Torsin Family 1 Member B                           | 3.21   | 7.55    | 7.66    | 5.97   | 1.31  | 4.82E-02 | -0.20 | 8.23E-01 | -0.01 | 9.97E-01 | EGA2-1 |
| ENSMMUG00000038373 | SET       | SET Nuclear Proto-oncogene                         | 23.76  | 141.93  | 153.57  | 95.60  | 2.58  | 1.05E-04 | 0.22  | 8.25E-01 | -0.61 | 6.74E-01 | EGA2-1 |
| ENSMMUG00000018258 | PTGES2    | Prostaglandin E Synthase 2                         | 1.11   | 3.93    | 9.43    | 11.56  | 1.99  | 3.76E-02 | 1.47  | 1.35E-01 | -0.17 | 9.60E-01 | EGA2-1 |
| ENSMMUG00000010178 | LOC701554 | Neugrin, Neurite Outgrowth Associated-like         | 5.63   | 34.33   | 33.59   | 11.83  | 2.47  | 6.20E-05 | -0.13 | 8.89E-01 | -1.09 | 2.77E-01 | EGA2-1 |
| ENSMMUG00000005215 | RABEPK    | Rab9 Effector Protein With Kelch Motifs            | 0.08   | 0.38    | 0.94    | 0.62   | 5.42  | 1.88E-03 | 1.19  | 5.44E-01 | 0.37  | 9.47E-01 | EGA2-1 |
| ENSMMUG00000005260 | RPL35     | Ribosomal Protein L35                              | 3.63   | 36.34   | 45.99   | 46.63  | 3.34  | 4.70E-10 | 0.41  | 5.74E-01 | -0.41 | 7.57E-01 | EGA2-1 |
| ENSMMUG00000008561 | KIF12     | Kinesin Family Member 12                           | 0.01   | 3.76    | 2.68    | 1.39   | 8.65  | 2.92E-07 | 0.27  | 9.10E-01 | -0.80 | 8.46E-01 | EGA2-1 |
| ENSMMUG00000005851 | BSPRY     | B-box And SPRY Domain Containing                   | 0.04   | 1.38    | 2.47    | 10.02  | 7.38  | 5.53E-08 | -0.31 | 8.70E-01 | 1.52  | 5.31E-01 | EGA2-1 |
| ENSMMUG00000000464 | PTBP3     | Polypyrimidine Tract Binding Protein 3             | 6.29   | 18.32   | 28.76   | 43.49  | 1.94  | 2.49E-03 | 0.04  | 9.68E-01 | 0.58  | 6.61E-01 | EGA2-1 |



|                    |            |                                                                  |        |         |         |        |      |          |       |          |       |          |        |
|--------------------|------------|------------------------------------------------------------------|--------|---------|---------|--------|------|----------|-------|----------|-------|----------|--------|
| ENSMMUG00000032563 |            |                                                                  | 3.08   | 17.52   | 10.90   | 10.37  | 2.22 | 4.80E-04 | -0.48 | 5.57E-01 | 0.17  | 9.35E-01 | EGA2-1 |
| ENSMMUG00000047317 |            |                                                                  | 0.01   | 1.31    | 1.20    | 0.21   | 7.25 | 2.48E-03 | 0.04  | 9.91E-01 | -3.40 | 4.00E-01 | EGA2-1 |
| ENSMMUG00000023797 | TMEM246    | Transmembrane Protein 246                                        | 0.06   | 0.60    | 0.46    | 0.47   | 7.92 | 1.45E-03 | -0.97 | 7.71E-01 | -0.97 | 8.87E-01 | EGA2-1 |
| ENSMMUG00000040020 |            |                                                                  | 4.19   | 9.64    | 38.50   | 22.33  | 6.26 | 5.68E-04 | -0.15 | 9.58E-01 | -1.64 | 6.48E-01 | EGA2-1 |
| ENSMMUG00000000494 | LOC711523  | Ankyrin Repeat Domain-containing Protein 18A                     | 1.62   | 8.33    | 6.46    | 5.65   | 2.04 | 3.10E-02 | 0.10  | 9.46E-01 | -0.76 | 6.96E-01 | EGA2-1 |
| ENSMMUG00000017887 | LOC718745  | Mitochondrial Import Receptor Subunit TOM5 Homolog               | 4.90   | 60.21   | 81.87   | 43.88  | 3.51 | 3.33E-05 | 0.90  | 3.84E-01 | -1.20 | 4.32E-01 | EGA2-1 |
| ENSMMUG00000031876 | LOC706606  | 60S Ribosomal Protein L23a-like                                  | 234.46 | 974.15  | 847.95  | 766.67 | 2.08 | 2.08E-08 | -0.11 | 8.54E-01 | -0.23 | 8.14E-01 | EGA2-1 |
| ENSMMUG00000016321 | TPM2       | Tropomyosin 2                                                    | 1.37   | 6.26    | 11.01   | 9.28   | 2.51 | 1.97E-02 | -0.32 | 8.32E-01 | 1.81  | 2.62E-01 | EGA2-1 |
| ENSMMUG00000011862 | FAM214B    | Family With Sequence Similarity 214 Member B                     | 0.27   | 41.86   | 21.15   | 3.95   | 7.68 | 1.03E-18 | -1.62 | 1.17E-01 | -2.07 | 1.29E-01 | EGA2-1 |
| ENSMMUG00000020190 | VCP        | Valosin Containing Protein                                       | 5.25   | 19.46   | 39.30   | 42.82  | 1.99 | 2.82E-04 | 0.79  | 2.07E-01 | -0.23 | 8.84E-01 | EGA2-1 |
| ENSMMUG00000039762 | MYORG      | Myogenesis Regulating Glycosidase (putative)                     | 0.06   | 0.79    | 1.96    | 6.99   | 3.37 | 6.63E-03 | 2.05  | 1.16E-01 | 2.23  | 2.28E-01 | EGA2-1 |
| ENSMMUG00000000389 | NOL6       | Nucleolar Protein 6                                              | 3.27   | 11.03   | 8.40    | 5.74   | 1.68 | 2.05E-02 | -0.47 | 6.01E-01 | -0.44 | 7.92E-01 | EGA2-1 |
| ENSMMUG00000002088 | SMU1       | SMU1, DNA Replication Regulator And Spliceosomal Factor          | 12.88  | 37.51   | 21.30   | 23.29  | 1.48 | 3.09E-03 | -1.01 | 5.42E-02 | -0.17 | 9.05E-01 | EGA2-1 |
| ENSMMUG00000002685 | NDUFB6     | NADH:ubiquinone Oxidoreductase Subunit B6                        | 6.29   | 22.96   | 22.24   | 21.16  | 1.83 | 6.50E-03 | 0.17  | 8.56E-01 | -0.02 | 9.95E-01 | EGA2-1 |
| ENSMMUG00000045740 | ACER2      | Alkaline Ceramidase 2                                            | 0.18   | 4.27    | 2.91    | 10.52  | 5.00 | 3.74E-07 | -1.31 | 2.70E-01 | 2.61  | 6.13E-02 | EGA2-1 |
| ENSMMUG00000003412 | LOC712274  | 40S Ribosomal Protein S6                                         | 108.13 | 472.38  | 655.79  | 559.90 | 2.28 | 2.17E-14 | 0.42  | 2.63E-01 | -0.36 | 5.60E-01 | EGA2-1 |
| ENSMMUG00000013997 | LOC712661  | Perilipin-2                                                      | 8.89   | 52.10   | 116.29  | 128.03 | 2.73 | 4.41E-07 | 0.90  | 1.50E-01 | 0.15  | 9.37E-01 | EGA2-1 |
| ENSMMUG00000018396 | HAUS6      | HAUS Augmin Like Complex Subunit 6                               | 1.58   | 9.67    | 11.41   | 6.54   | 2.88 | 2.28E-05 | 0.20  | 8.45E-01 | -1.36 | 1.99E-01 | EGA2-1 |
| ENSMMUG00000016189 |            |                                                                  | 18.80  | 66.95   | 58.40   | 35.84  | 1.71 | 3.08E-02 | -0.76 | 3.99E-01 | -0.01 | 9.99E-01 | EGA2-1 |
| ENSMMUG00000048472 | DMAC1      | Distal Membrane Arm Assembly Complex 1                           | 0.79   | 6.00    | 4.42    | 5.88   | 3.16 | 1.93E-04 | -0.79 | 4.54E-01 | 0.82  | 6.43E-01 | EGA2-1 |
| ENSMMUG00000007991 |            |                                                                  | 243.91 | 1384.54 | 1260.86 | 876.29 | 2.15 | 1.83E-04 | 0.16  | 8.52E-01 | -0.72 | 5.08E-01 | EGA2-1 |
| ENSMMUG00000018306 | KIAA2026   | KIAA2026 Ortholog                                                | 2.08   | 5.78    | 10.18   | 7.66   | 1.60 | 3.72E-03 | 1.04  | 7.44E-02 | -0.56 | 6.08E-01 | EGA2-1 |
| ENSMMUG00000002362 | PUM3       | Pumilio RNA Binding Family Member 3                              | 9.14   | 32.49   | 42.89   | 20.83  | 1.31 | 4.99E-02 | 0.86  | 2.21E-01 | -0.31 | 8.52E-01 | EGA2-1 |
| ENSMMUG00000000357 | FXN        | Frataxin                                                         | 2.52   | 13.30   | 14.45   | 12.27  | 2.64 | 1.81E-02 | -0.04 | 9.79E-01 | 0.13  | 9.74E-01 | EGA2-1 |
| ENSMMUG00000013102 | TRPM6      | Transient Receptor Potential Cation Channel Subfamily M Member 6 | 0.31   | 2.80    | 2.84    | 3.13   | 2.76 | 7.35E-04 | 0.82  | 4.05E-01 | 0.38  | 8.63E-01 | EGA2-1 |
| ENSMMUG00000039415 | LOC706270  | U1 Small Nuclear Ribonucleoprotein C-like                        | 1.86   | 8.01    | 3.50    | 3.53   | 2.35 | 1.16E-02 | -1.69 | 8.21E-02 | 0.36  | 8.91E-01 | EGA2-1 |
| ENSMMUG00000018870 | C15H9orf64 | Chromosome 15 Open Reading Frame, Human C9orf64                  | 0.25   | 2.47    | 4.48    | 4.28   | 3.82 | 9.72E-03 | 0.66  | 7.25E-01 | -0.08 | 9.87E-01 | EGA2-1 |
| ENSMMUG00000018871 | HNRNPK     | Heterogeneous Nuclear Ribonucleoprotein K                        | 69.36  | 250.88  | 237.54  | 218.35 | 1.79 | 1.44E-05 | 0.08  | 9.06E-01 | 0.01  | 9.97E-01 | EGA2-1 |
| ENSMMUG00000038581 |            |                                                                  | 13.56  | 46.16   | 59.98   | 71.20  | 1.93 | 3.12E-04 | 0.23  | 7.65E-01 | 0.34  | 7.98E-01 | EGA2-1 |
| ENSMMUG0000003237  |            |                                                                  | 0.83   | 4.59    | 5.26    | 1.90   | 3.83 | 1.64E-03 | -1.00 | 5.04E-01 | -1.60 | 4.62E-01 | EGA2-1 |
| ENSMMUG00000017704 |            |                                                                  | 14.44  | 62.56   | 55.53   | 15.44  | 2.13 | 4.45E-03 | -0.77 | 3.79E-01 | -0.95 | 4.79E-01 | EGA2-1 |
| ENSMMUG00000023225 | E2F6       | E2F Transcription Factor 6                                       | 0.19   | 10.27   | 3.61    | 3.49   | 5.74 | 2.27E-08 | -1.82 | 1.19E-01 | 0.70  | 7.89E-01 | EGA2-1 |
| ENSMMUG00000048618 |            |                                                                  | 8.20   | 19.61   | 25.56   | 31.47  | 1.10 | 4.69E-02 | 0.64  | 2.87E-01 | -0.38 | 7.53E-01 | EGA2-1 |
| ENSMMUG00000043320 |            |                                                                  | 2.44   | 8.10    | 9.13    | 5.32   | 1.61 | 1.22E-02 | -0.42 | 6.00E-01 | 0.16  | 9.39E-01 | EGA2-1 |
| ENSMMUG00000010257 | SLC5A6     | Solute Carrier Family 5 Member 6                                 | 0.94   | 60.72   | 62.20   | 57.40  | 6.06 | 4.34E-29 | 0.20  | 8.14E-01 | -0.24 | 8.87E-01 | EGA2-1 |
| ENSMMUG00000008287 | EIF2B4     | Eukaryotic Translation Initiation Factor 2B Subunit Delta        | 1.03   | 3.64    | 4.00    | 4.01   | 1.80 | 5.22E-03 | 0.26  | 7.75E-01 | -0.05 | 9.85E-01 | EGA2-1 |
| ENSMMUG00000022268 | WDR43      | WD Repeat Domain 43                                              | 6.53   | 31.69   | 40.98   | 29.36  | 2.12 | 2.49E-05 | 0.65  | 2.79E-01 | -0.30 | 8.17E-01 | EGA2-1 |
| ENSMMUG00000030876 | SLC30A6    | Solute Carrier Family 30 Member 6                                | 1.12   | 3.17    | 4.65    | 4.54   | 1.63 | 2.43E-02 | -0.27 | 7.85E-01 | 0.52  | 7.39E-01 | EGA2-1 |

|                     |         |                                                                                                      |        |         |         |       |      |          |       |          |       |          |        |
|---------------------|---------|------------------------------------------------------------------------------------------------------|--------|---------|---------|-------|------|----------|-------|----------|-------|----------|--------|
| ENSMMUG00000009372  | TTC27   | Tetratricopeptide Repeat Domain 27                                                                   | 0.57   | 12.98   | 13.92   | 7.97  | 3.99 | 1.20E-05 | 0.36  | 7.91E-01 | -0.34 | 9.03E-01 | EGA2-1 |
| ENSMMUG00000016433  | CEBPZ   | CCAAT/enhancer Binding Protein Zeta                                                                  | 7.66   | 51.66   | 45.69   | 19.82 | 2.64 | 3.54E-06 | -0.34 | 6.64E-01 | -0.73 | 5.04E-01 | EGA2-1 |
| ENSMMUG00000013945  | CYP1B1  | Cytochrome P450, Family 1, Subfamily B, Polypeptide 1                                                | 0.03   | 2.36    | 1.18    | 1.07  | 8.28 | 5.29E-07 | -1.79 | 3.43E-01 | -1.76 | 5.75E-01 | EGA2-1 |
| ENSMMUG00000011025  | SRSF7   | Serine And Arginine Rich Splicing Factor 7                                                           | 16.83  | 76.30   | 88.22   | 84.90 | 2.37 | 2.22E-06 | 0.21  | 7.78E-01 | 0.03  | 9.90E-01 | EGA2-1 |
| ENSMMUG00000020575  | SOS1    | SOS Ras/Rac Guanine Nucleotide Exchange Factor 1                                                     | 2.23   | 12.72   | 41.11   | 21.95 | 2.43 | 6.63E-03 | 1.59  | 9.11E-02 | -0.61 | 7.68E-01 | EGA2-1 |
| ENSMMUG00000013388  |         |                                                                                                      | 335.61 | 1264.40 | 1323.21 | ##### | 2.12 | 3.19E-20 | -0.03 | 9.42E-01 | -0.43 | 2.83E-01 | EGA2-1 |
| ENSMMUG00000042653  | ZFP36L2 | ZFP36 Ring Finger Protein Like 2                                                                     | 0.98   | 5.24    | 9.61    | 11.96 | 2.72 | 5.46E-05 | 0.42  | 6.45E-01 | 0.48  | 7.71E-01 | EGA2-1 |
| ENSMMUG00000042395  | MCFD2   | Multiple Coagulation Factor Deficiency 2                                                             | 0.78   | 5.87    | 7.38    | 7.50  | 3.19 | 6.89E-05 | 0.61  | 5.59E-01 | 0.46  | 8.27E-01 | EGA2-1 |
| ENSMMUG00000003310  | TTC7A   | Tetratricopeptide Repeat Domain 7A                                                                   | 0.17   | 1.60    | 1.56    | 2.03  | 3.08 | 4.13E-02 | 0.42  | 8.41E-01 | 1.18  | 7.01E-01 | EGA2-1 |
| ENSMMUG00000000974  | MSH2    | MutS Homolog 2                                                                                       | 40.09  | 116.14  | 136.47  | 63.44 | 1.66 | 1.42E-03 | 0.20  | 7.93E-01 | -1.02 | 1.90E-01 | EGA2-1 |
| ENSMMUG00000022842  | MSH6    | MutS Homolog 6                                                                                       | 12.11  | 52.80   | 41.94   | 37.01 | 2.02 | 2.75E-06 | -0.16 | 8.07E-01 | -0.19 | 8.81E-01 | EGA2-1 |
| ENSMMUG00000020677  | FOXN2   | Forkhead Box N2                                                                                      | 1.29   | 7.14    | 12.87   | 10.37 | 2.40 | 5.06E-06 | 1.03  | 7.97E-02 | -0.13 | 9.47E-01 | EGA2-1 |
| ENSMMUG00000022853  | PPP1R21 | Protein Phosphatase 1 Regulatory Subunit 21                                                          | 0.26   | 3.06    | 2.03    | 3.82  | 3.51 | 3.06E-04 | -0.06 | 9.68E-01 | 0.46  | 8.62E-01 | EGA2-1 |
| ENSMMUG00000007203  |         |                                                                                                      | 0.28   | 6.72    | 6.87    | 1.53  | 4.87 | 9.13E-06 | -0.18 | 9.15E-01 | -1.69 | 3.81E-01 | EGA2-1 |
| ENSMMUG00000030827  |         |                                                                                                      | 8.43   | 59.87   | 51.45   | 32.41 | 2.82 | 1.49E-06 | -0.13 | 8.92E-01 | -0.17 | 9.32E-01 | EGA2-1 |
| ENSMMUG00000048086  |         |                                                                                                      | 2.41   | 30.73   | 7.77    | 47.51 | 2.57 | 2.92E-02 | -1.11 | 4.10E-01 | 2.11  | 2.19E-01 | EGA2-1 |
| ENSMMUG00000006504  |         |                                                                                                      | 0.02   | 5.21    | 1.24    | 0.39  | 5.45 | 3.04E-02 | -2.78 | 3.09E-01 | 4.79  | 1.90E-01 | EGA2-1 |
| ENSMMUG00000041557  | C1D     | C1D Nuclear Receptor Corepressor                                                                     | 0.03   | 5.95    | 2.90    | 2.87  | 8.11 | 6.84E-20 | -1.10 | 2.97E-01 | -0.64 | 7.69E-01 | EGA2-1 |
| ENSMMUG00000017209  | C1D     | C1D Nuclear Receptor Corepressor                                                                     | 0.02   | 9.16    | 12.47   | 6.25  | 8.95 | 1.71E-18 | 1.26  | 2.45E-01 | -1.48 | 3.61E-01 | EGA2-1 |
| ENSMMUG00000017460  | WDR92   | WD Repeat Domain 92                                                                                  | 6.70   | 16.13   | 14.61   | 5.07  | 1.79 | 2.83E-02 | -1.31 | 1.21E-01 | -1.00 | 4.77E-01 | EGA2-1 |
| ENSMMUG00000048515  |         |                                                                                                      | 25.65  | 63.93   | 87.18   | 91.35 | 1.22 | 4.63E-03 | 0.58  | 2.27E-01 | -0.26 | 8.03E-01 | EGA2-1 |
| ENSMMUG00000001126  | TIA1    | TIA1 Cytotoxic Granule Associated RNA Binding Protein                                                | 1.21   | 5.70    | 7.28    | 12.28 | 2.19 | 4.38E-04 | 0.32  | 7.08E-01 | 1.07  | 2.80E-01 | EGA2-1 |
| ENSMMUG00000043380  |         |                                                                                                      | 10.46  | 61.58   | 104.02  | 59.28 | 2.46 | 2.75E-07 | 0.71  | 2.10E-01 | -0.62 | 4.99E-01 | EGA2-1 |
| ENSMMUG00000041984  | NOTO    | Notochord Homeobox                                                                                   | 0.23   | 1.89    | 12.68   | 0.52  | 4.98 | 5.83E-03 | 2.19  | 2.41E-01 | 0.15  | 9.81E-01 | EGA2-1 |
| ENSMMUG00000012448  | CCT7    | Chaperonin Containing TCP1 Subunit 7                                                                 | 1.22   | 17.05   | 49.51   | 49.97 | 4.11 | 3.11E-06 | 1.50  | 1.36E-01 | 0.56  | 8.05E-01 | EGA2-1 |
| ENSMMUG00000002880  |         |                                                                                                      | 4.38   | 40.10   | 23.49   | 27.22 | 2.89 | 6.20E-06 | -0.61 | 4.48E-01 | 0.97  | 3.93E-01 | EGA2-1 |
| ENSMMUG00000030805  | TPRKB   | TP53RK Binding Protein                                                                               | 0.55   | 7.53    | 8.29    | 8.40  | 3.51 | 2.33E-05 | 0.41  | 7.28E-01 | 0.07  | 9.82E-01 | EGA2-1 |
| ENSMMUG00000017683  | ACTG2   | Actin, Gamma 2, Smooth Muscle, Enteric                                                               | 0.10   | 1.14    | 4.50    | 1.19  | 3.71 | 5.46E-03 | -0.39 | 8.38E-01 | -0.16 | 9.74E-01 | EGA2-1 |
| ENSMMUG00000049122  | BOLA3   | BolA Family Member 3                                                                                 | 0.50   | 9.01    | 7.20    | 8.42  | 2.33 | 1.80E-02 | 0.20  | 8.90E-01 | 2.01  | 1.44E-01 | EGA2-1 |
| ENSMMUG000000009739 | MTHFD2  | Methylenetetrahydrofolate Dehydrogenase (NADP+ Dependent) 2, Methenyltetrahydrofolate Cyclohydrolase | 9.06   | 36.65   | 38.74   | 28.80 | 2.10 | 6.00E-04 | -0.31 | 7.13E-01 | -0.55 | 6.78E-01 | EGA2-1 |
| ENSMMUG00000002728  | INO80B  | INO80 Complex Subunit B                                                                              | 3.75   | 22.37   | 9.35    | 5.65  | 2.28 | 9.26E-03 | -1.39 | 1.39E-01 | -0.79 | 6.58E-01 | EGA2-1 |
| ENSMMUG00000002131  | AUP1    | AUP1, Lipid Droplet Regulating VLDL Assembly Factor                                                  | 4.20   | 24.10   | 13.69   | 18.14 | 2.35 | 2.54E-02 | -1.10 | 3.53E-01 | 0.65  | 7.89E-01 | EGA2-1 |
| ENSMMUG00000023758  | MRPL19  | Mitochondrial Ribosomal Protein L19                                                                  | 7.69   | 16.09   | 34.93   | 16.10 | 1.30 | 2.84E-02 | 1.02  | 9.07E-02 | -0.89 | 3.38E-01 | EGA2-1 |
| ENSMMUG00000030791  |         |                                                                                                      | 2.22   | 25.70   | 19.25   | 3.65  | 3.86 | 8.59E-08 | -1.37 | 9.46E-02 | -1.43 | 2.22E-01 | EGA2-1 |
| ENSMMUG00000004450  | MAT2A   | Methionine Adenosyltransferase 2A                                                                    | 30.69  | 133.66  | 109.18  | 61.17 | 1.98 | 3.93E-05 | -0.03 | 9.69E-01 | -0.83 | 2.91E-01 | EGA2-1 |
| ENSMMUG00000004446  | GGCX    | Gamma-glutamyl Carboxylase                                                                           | 0.25   | 1.68    | 0.45    | 1.91  | 3.09 | 2.25E-02 | -2.33 | 9.59E-02 | 2.05  | 3.35E-01 | EGA2-1 |
| ENSMMUG00000010534  | TEX37   | Testis Expressed 37                                                                                  | 0.01   | 2.42    | 0.38    | 0.01  | 6.24 | 7.08E-03 | -0.14 | 9.66E-01 | -4.72 | 1.37E-01 | EGA2-1 |

|                    |           |                                                                   |        |        |        |        |      |          |       |          |       |          |        |
|--------------------|-----------|-------------------------------------------------------------------|--------|--------|--------|--------|------|----------|-------|----------|-------|----------|--------|
| ENSMMUG00000009254 | EIF2AK3   | Eukaryotic Translation Initiation Factor 2 Alpha Kinase 3         | 0.16   | 0.86   | 0.96   | 1.89   | 3.17 | 2.88E-04 | -0.25 | 8.48E-01 | 1.07  | 5.16E-01 | EGA2-1 |
| ENSMMUG00000023261 | SNRNP200  | Small Nuclear Ribonucleoprotein U5 Subunit 200                    | 9.01   | 26.71  | 17.91  | 19.93  | 1.48 | 4.23E-04 | -0.79 | 8.19E-02 | 0.53  | 5.02E-01 | EGA2-1 |
| ENSMMUG00000021019 | RANBP2    | RAN Binding Protein 2                                             | 16.97  | 47.02  | 59.13  | 42.37  | 1.37 | 1.13E-03 | 0.44  | 3.79E-01 | -0.40 | 6.43E-01 | EGA2-1 |
| ENSMMUG00000008434 | LOC706567 | Ankyrin Repeat Domain-containing Protein 36B-like                 | 0.01   | 1.60   | 1.63   | 0.10   | 6.16 | 1.00E-05 | -0.38 | 8.53E-01 | -2.13 | 3.91E-01 | EGA2-1 |
| ENSMMUG00000006668 | TUBA3C    | Tubulin Alpha 3c                                                  | 7.27   | 24.21  | 12.18  | 1.61   | 2.03 | 3.04E-02 | -1.33 | 1.81E-01 | -2.04 | 1.04E-01 | EGA2-1 |
| ENSMMUG00000047261 |           |                                                                   | 0.04   | 3.93   | 1.95   | 3.13   | 6.10 | 2.49E-06 | 0.08  | 9.67E-01 | -0.06 | 9.92E-01 | EGA2-1 |
| ENSMMUG00000044254 |           |                                                                   | 0.06   | 1.15   | 6.29   | 3.70   | 5.61 | 1.66E-03 | 2.17  | 2.23E-01 | -0.17 | 9.77E-01 | EGA2-1 |
| ENSMMUG00000010416 | SAP18     | Sin3A Associated Protein 18                                       | 30.03  | 64.24  | 79.43  | 41.49  | 1.09 | 3.03E-02 | 0.20  | 7.62E-01 | -0.82 | 2.75E-01 | EGA2-1 |
| ENSMMUG00000007373 | ZDHHC20   | Zinc Finger DHHC-type Containing 20                               | 0.93   | 6.35   | 15.84  | 20.43  | 2.95 | 6.19E-04 | 1.38  | 1.50E-01 | 0.06  | 9.85E-01 | EGA2-1 |
| ENSMMUG00000039518 |           |                                                                   | 1.33   | 11.15  | 5.38   | 6.62   | 3.07 | 4.41E-02 | -1.84 | 2.64E-01 | 1.06  | 7.51E-01 | EGA2-1 |
| ENSMMUG00000020386 | POLR1D    | RNA Polymerase I Subunit D                                        | 20.11  | 73.45  | 68.74  | 31.88  | 1.85 | 5.33E-04 | 0.24  | 7.46E-01 | -1.09 | 1.74E-01 | EGA2-1 |
| ENSMMUG00000030802 |           |                                                                   | 3.01   | 10.96  | 5.33   | 2.52   | 1.76 | 2.84E-02 | -0.90 | 3.19E-01 | -0.73 | 6.51E-01 | EGA2-1 |
| ENSMMUG00000030801 | LOC721751 | 60S Ribosomal Protein L23a Pseudogene                             | 179.27 | 736.70 | 671.53 | 597.21 | 2.04 | 3.35E-08 | -0.03 | 9.67E-01 | -0.23 | 8.11E-01 | EGA2-1 |
| ENSMMUG00000046615 | HMGB1     | High Mobility Group Box 1                                         | 43.00  | 85.89  | 148.12 | 109.06 | 1.05 | 4.52E-03 | 0.75  | 5.03E-02 | -0.40 | 5.63E-01 | EGA2-1 |
| ENSMMUG00000013707 | HSPH1     | Heat Shock Protein Family H (Hsp110) Member 1                     | 1.22   | 27.33  | 16.81  | 39.94  | 4.28 | 1.66E-10 | -0.62 | 4.81E-01 | 1.51  | 1.51E-01 | EGA2-1 |
| ENSMMUG00000042641 |           |                                                                   | 13.74  | 41.23  | 29.07  | 10.00  | 2.19 | 1.20E-03 | -1.20 | 1.03E-01 | -0.64 | 6.54E-01 | EGA2-1 |
| ENSMMUG00000003585 | ALG5      | ALG5, Dolichylphosphate Beta-glucosyltransferase                  | 0.43   | 8.85   | 11.32  | 14.97  | 4.22 | 5.18E-04 | 0.84  | 5.89E-01 | 0.57  | 8.62E-01 | EGA2-1 |
| ENSMMUG00000013689 | DNAJC15   | DnaJ Heat Shock Protein Family (Hsp40) Member C15                 | 8.47   | 127.26 | 206.52 | 97.23  | 3.94 | 4.45E-09 | 1.01  | 2.10E-01 | -1.07 | 3.76E-01 | EGA2-1 |
| ENSMMUG00000017988 | MED4      | Mediator Complex Subunit 4                                        | 1.55   | 24.55  | 33.39  | 27.08  | 3.56 | 7.53E-08 | 0.49  | 5.80E-01 | 0.63  | 6.70E-01 | EGA2-1 |
| ENSMMUG00000041761 |           |                                                                   | 68.03  | 179.68 | 194.09 | 171.72 | 1.48 | 5.73E-06 | 0.04  | 9.44E-01 | -0.27 | 7.23E-01 | EGA2-1 |
| ENSMMUG00000038987 | LOC723355 | Peptidyl-prolyl Cis-trans Isomerase NIMA-interacting 4 Pseudogene | 11.86  | 54.63  | 63.46  | 31.82  | 2.44 | 1.31E-02 | -0.01 | 9.95E-01 | -0.20 | 9.52E-01 | EGA2-1 |
| ENSMMUG00000000787 | DIS3      | DIS3 Homolog, Exosome Endoribonuclease And 3'-5' Exoribonuclease  | 1.15   | 49.37  | 49.07  | 31.41  | 5.27 | 3.24E-21 | -0.29 | 7.35E-01 | -0.53 | 6.86E-01 | EGA2-1 |
| ENSMMUG00000002533 | KLF5      | Kruppel Like Factor 5                                             | 7.09   | 45.44  | 54.90  | 66.98  | 2.56 | 2.41E-09 | -0.04 | 9.59E-01 | 0.46  | 6.22E-01 | EGA2-1 |
| ENSMMUG00000021460 |           |                                                                   | 9.91   | 121.10 | 119.20 | 117.01 | 3.55 | 5.20E-07 | 0.14  | 9.03E-01 | -0.18 | 9.44E-01 | EGA2-1 |
| ENSMMUG00000045330 |           |                                                                   | 0.53   | 2.36   | 3.99   | 3.81   | 2.00 | 2.30E-02 | 0.97  | 3.11E-01 | -0.20 | 9.47E-01 | EGA2-1 |
| ENSMMUG00000030679 |           |                                                                   | 25.78  | 66.88  | 88.81  | 101.36 | 1.35 | 3.02E-03 | 0.46  | 3.97E-01 | -0.18 | 8.91E-01 | EGA2-1 |
| ENSMMUG00000018292 | SPRY2     | Sprouty RTK Signaling Antagonist 2                                | 0.06   | 0.94   | 2.03   | 4.94   | 4.41 | 4.47E-03 | -0.06 | 9.81E-01 | 2.34  | 3.49E-01 | EGA2-1 |
| ENSMMUG00000009018 | LOC698713 | 60S Ribosomal Protein L13a-like                                   | 14.45  | 65.12  | 94.06  | 103.35 | 2.14 | 2.86E-06 | 0.66  | 2.22E-01 | -0.27 | 8.19E-01 | EGA2-1 |
| ENSMMUG00000013059 | GPR180    | G Protein-coupled Receptor 180                                    | 0.47   | 3.47   | 2.10   | 1.13   | 2.72 | 5.93E-03 | -0.20 | 8.90E-01 | -0.80 | 7.06E-01 | EGA2-1 |
| ENSMMUG00000045088 |           |                                                                   | 0.83   | 60.46  | 49.43  | 17.10  | 5.95 | 2.07E-22 | -0.56 | 4.85E-01 | -0.84 | 4.86E-01 | EGA2-1 |
| ENSMMUG00000014821 |           |                                                                   | 0.04   | 0.92   | 0.26   | 0.27   | 7.18 | 1.84E-03 | -4.41 | 6.23E-02 | 0.17  | 9.85E-01 | EGA2-1 |
| ENSMMUG00000048147 |           |                                                                   | 0.35   | 6.07   | 0.89   | 0.60   | 4.15 | 9.39E-03 | -3.21 | 5.23E-02 | -0.45 | 9.28E-01 | EGA2-1 |
| ENSMMUG00000000169 | ARFRP1    | ADP Ribosylation Factor Related Protein 1                         | 0.13   | 1.25   | 1.17   | 2.57   | 5.42 | 2.33E-04 | -0.40 | 8.53E-01 | 1.44  | 6.25E-01 | EGA2-1 |
| ENSMMUG00000015911 | ARFGAP1   | ADP Ribosylation Factor GTPase Activating Protein 1               | 0.63   | 5.91   | 3.49   | 3.48   | 3.91 | 4.41E-05 | -0.76 | 5.41E-01 | 0.34  | 9.05E-01 | EGA2-1 |
| ENSMMUG00000005006 |           |                                                                   | 46.76  | 210.87 | 287.01 | 205.70 | 1.95 | 5.00E-06 | 0.30  | 5.98E-01 | -0.28 | 7.92E-01 | EGA2-1 |
| ENSMMUG00000009364 | TFAP2C    | Transcription Factor AP-2 Gamma                                   | 3.88   | 32.79  | 27.30  | 27.61  | 3.03 | 2.91E-08 | -0.01 | 9.95E-01 | -0.27 | 8.63E-01 | EGA2-1 |

|                     |              |                                                             |       |        |        |        |       |          |       |          |       |          |        |
|---------------------|--------------|-------------------------------------------------------------|-------|--------|--------|--------|-------|----------|-------|----------|-------|----------|--------|
| ENSMMUG00000046647  | FAM209B      | Family With Sequence Similarity 209 Member B                | 0.00  | 2.44   | 0.39   | 0.10   | 10.10 | 6.34E-05 | -1.20 | 7.23E-01 | -2.15 | 6.98E-01 | EGA2-1 |
| ENSMMUG00000031385  | LOC706108    | 60S Acidic Ribosomal Protein P1 Pseudogene                  | 53.33 | 156.67 | 348.89 | 249.00 | 1.80  | 1.61E-03 | 0.74  | 2.54E-01 | -0.43 | 7.43E-01 | EGA2-1 |
| ENSMMUG00000000079  | LOC697817    | Protein FAM209A-like                                        | 0.05  | 2.51   | 3.14   | 0.19   | 8.31  | 2.29E-04 | -0.90 | 7.61E-01 | -3.05 | 4.41E-01 | EGA2-1 |
| ENSMMUG00000018358  | ZNF217       | Zinc Finger Protein 217                                     | 2.14  | 29.17  | 31.74  | 18.79  | 3.81  | 2.62E-19 | -0.12 | 8.60E-01 | -0.78 | 2.93E-01 | EGA2-1 |
| ENSMMUG00000003870  | SALL4        | Spalt Like Transcription Factor 4                           | 7.63  | 58.32  | 65.31  | 43.87  | 2.73  | 6.70E-11 | 0.45  | 4.08E-01 | -0.54 | 5.19E-01 | EGA2-1 |
| ENSMMUG00000002758  | MOC53        | Molybdenum Cofactor Synthesis 3                             | 0.07  | 2.40   | 1.78   | 1.68   | 5.01  | 1.17E-03 | -0.28 | 9.01E-01 | -0.91 | 8.05E-01 | EGA2-1 |
| ENSMMUG00000002759  | DPM1         | Dolichyl-phosphate Mannosyltransferase Subunit 1, Catalytic | 1.03  | 5.33   | 15.33  | 8.56   | 2.00  | 3.59E-02 | 1.60  | 9.60E-02 | 0.25  | 9.32E-01 | EGA2-1 |
| ENSMMUG00000002761  | ADNP         | Activity Dependent Neuroprotector Homeobox                  | 4.55  | 10.43  | 29.67  | 20.99  | 1.71  | 1.71E-03 | 0.97  | 9.96E-02 | 0.04  | 9.86E-01 | EGA2-1 |
| ENSMMUG00000023621  | DDX27        | DEAD-box Helicase 27                                        | 14.77 | 55.30  | 54.69  | 24.19  | 1.54  | 3.32E-03 | 0.33  | 6.21E-01 | -1.19 | 1.04E-01 | EGA2-1 |
| ENSMMUG00000040333  |              |                                                             | 0.41  | 4.55   | 4.51   | 6.68   | 3.72  | 2.30E-02 | -1.18 | 5.37E-01 | 0.87  | 8.22E-01 | EGA2-1 |
| ENSMMUG00000006464  | HNF4A        | Hepatocyte Nuclear Factor 4 Alpha                           | 0.39  | 4.14   | 16.40  | 19.31  | 2.95  | 7.62E-03 | 1.59  | 1.87E-01 | 0.06  | 9.88E-01 | EGA2-1 |
| ENSMMUG00000006131  |              |                                                             | 3.09  | 19.92  | 46.20  | 55.26  | 2.32  | 3.02E-03 | 1.43  | 8.51E-02 | -0.33 | 8.78E-01 | EGA2-1 |
| ENSMMUG00000006742  | SRSF6        | Serine And Arginine Rich Splicing Factor 6                  | 25.88 | 60.01  | 65.60  | 50.05  | 2.12  | 1.54E-04 | -0.35 | 6.45E-01 | -0.17 | 9.24E-01 | EGA2-1 |
| ENSMMUG00000006631  |              |                                                             | 16.87 | 46.05  | 37.28  | 25.21  | 1.33  | 1.97E-05 | -0.37 | 3.33E-01 | -0.42 | 4.70E-01 | EGA2-1 |
| ENSMMUG00000048613  |              |                                                             | 0.07  | 2.55   | 10.85  | 4.91   | 4.65  | 1.15E-03 | 1.35  | 3.79E-01 | 0.22  | 9.64E-01 | EGA2-1 |
| ENSMMUG00000010363  | RPN2         | Ribophorin II                                               | 8.74  | 23.27  | 42.42  | 50.45  | 1.62  | 2.25E-02 | 0.80  | 3.11E-01 | 0.01  | 9.98E-01 | EGA2-1 |
| ENSMMUG00000002089  | TLDC2        | TBC/LysM-associated Domain Containing 2                     | 0.09  | 0.82   | 0.33   | 0.07   | 4.62  | 4.62E-02 | -3.77 | 1.17E-01 | -0.07 | 9.94E-01 | EGA2-1 |
| ENSMMUG00000005579  | SOGA1        | Suppressor Of Glucose, Autophagy Associated 1               | 0.28  | 1.56   | 2.86   | 2.31   | 3.09  | 9.91E-03 | 1.13  | 4.19E-01 | -1.08 | 6.56E-01 | EGA2-1 |
| ENSMMUG00000009306  | SCAND1       | SCAN Domain Containing 1                                    | 0.36  | 1.11   | 0.80   | 2.99   | 4.59  | 1.41E-02 | -0.81 | 7.28E-01 | 2.00  | 5.32E-01 | EGA2-1 |
| ENSMMUG000000031284 | RBM39        | RNA Binding Motif Protein 39                                | 30.84 | 96.68  | 81.00  | 63.69  | 1.34  | 6.05E-03 | -0.12 | 8.66E-01 | 0.06  | 9.74E-01 | EGA2-1 |
| ENSMMUG00000020960  | RBM12        | RNA Binding Motif Protein 12                                | 9.94  | 22.37  | 37.43  | 31.60  | 1.17  | 1.77E-02 | 0.59  | 2.80E-01 | -0.10 | 9.52E-01 | EGA2-1 |
| ENSMMUG00000000921  |              |                                                             | 4.49  | 22.33  | 31.23  | 27.16  | 2.14  | 7.39E-03 | 0.06  | 9.61E-01 | -0.58 | 7.49E-01 | EGA2-1 |
| ENSMMUG00000010050  | SNRPB        | Small Nuclear Ribonucleoprotein Polypeptides B And B1       | 0.23  | 1.83   | 5.29   | 4.16   | 3.57  | 2.50E-06 | 1.53  | 6.68E-02 | -0.88 | 5.59E-01 | EGA2-1 |
| ENSMMUG00000013888  | NOP56        | NOP56 Ribonucleoprotein                                     | 2.98  | 47.37  | 47.11  | 29.37  | 3.94  | 2.96E-12 | 0.22  | 7.97E-01 | -0.58 | 6.42E-01 | EGA2-1 |
| ENSMMUG00000021328  | IDH3B        | Isocitrate Dehydrogenase 3 (NAD(+)) Beta                    | 0.59  | 5.71   | 8.44   | 11.43  | 3.78  | 2.71E-08 | 0.61  | 4.93E-01 | 0.19  | 9.37E-01 | EGA2-1 |
| ENSMMUG00000002982  | FASTKD5      | FAST Kinase Domains 5                                       | 4.50  | 16.21  | 12.10  | 9.29   | 1.57  | 4.43E-02 | -0.28 | 7.85E-01 | 0.12  | 9.66E-01 | EGA2-1 |
| ENSMMUG00000010028  | LZTS3        | Leucine Zipper Tumor Suppressor Family Member 3             | 0.03  | 1.12   | 2.23   | 1.06   | 5.86  | 4.39E-05 | 0.53  | 7.98E-01 | -1.59 | 5.75E-01 | EGA2-1 |
| ENSMMUG000000031189 | LOC717779    | 60S Acidic Ribosomal Protein P2 Pseudogene                  | 11.37 | 63.01  | 92.78  | 77.93  | 2.47  | 1.34E-05 | 0.17  | 8.45E-01 | 0.57  | 6.40E-01 | EGA2-1 |
| ENSMMUG00000013258  | TMEM230      | Transmembrane Protein 230                                   | 4.52  | 18.51  | 10.95  | 9.32   | 2.49  | 2.21E-03 | -0.77 | 4.30E-01 | -0.20 | 9.44E-01 | EGA2-1 |
| ENSMMUG00000013728  | TRMT6        | TRNA Methyltransferase 6                                    | 6.13  | 22.90  | 12.63  | 9.41   | 1.85  | 4.45E-03 | -1.01 | 1.54E-01 | -0.49 | 7.38E-01 | EGA2-1 |
| ENSMMUG00000006517  |              |                                                             | 5.26  | 16.38  | 13.31  | 10.95  | 1.53  | 4.97E-03 | -0.71 | 2.46E-01 | -0.08 | 9.67E-01 | EGA2-1 |
| ENSMMUG00000007545  |              |                                                             | 5.76  | 94.02  | 76.38  | 58.37  | 4.39  | 1.28E-12 | -0.24 | 8.06E-01 | -0.16 | 9.47E-01 | EGA2-1 |
| ENSMMUG000000023140 |              |                                                             | 0.34  | 2.61   | 5.12   | 6.66   | 3.16  | 1.74E-03 | 1.03  | 3.91E-01 | 0.13  | 9.74E-01 | EGA2-1 |
| ENSMMUG00000004143  | POLR3F       | RNA Polymerase III Subunit F                                | 4.18  | 19.02  | 6.30   | 4.26   | 1.83  | 2.26E-02 | -1.23 | 1.44E-01 | -0.26 | 9.08E-01 | EGA2-1 |
| ENSMMUG00000004146  | RBBP9        | RB Binding Protein 9, Serine Hydrolase                      | 0.09  | 19.65  | 29.42  | 13.50  | 7.67  | 3.43E-17 | 0.47  | 7.21E-01 | -1.03 | 5.87E-01 | EGA2-1 |
| ENSMMUG00000003630  |              |                                                             | 0.22  | 1.68   | 2.80   | 1.27   | 2.52  | 4.54E-02 | 1.14  | 4.05E-01 | -0.12 | 9.79E-01 | EGA2-1 |
| ENSMMUG00000010114  | RIN2         | Ras And Rab Interactor 2                                    | 0.30  | 1.09   | 3.83   | 1.47   | 3.58  | 5.04E-03 | 1.39  | 3.45E-01 | -1.06 | 6.96E-01 | EGA2-1 |
| ENSMMUG000000031139 | LOC100430605 | Peptidyl-prolyl Cis-trans Isomerase A Pseudogene            | 19.73 | 104.71 | 186.25 | 176.83 | 2.68  | 5.57E-05 | 0.91  | 2.46E-01 | 0.61  | 6.76E-01 | EGA2-1 |

|                     |           |                                                                       |       |        |        |        |      |          |       |          |       |          |        |
|---------------------|-----------|-----------------------------------------------------------------------|-------|--------|--------|--------|------|----------|-------|----------|-------|----------|--------|
| ENSMMUG00000019615  | TOMM6     | Translocase Of Outer Mitochondrial Membrane 6                         | 13.37 | 67.43  | 61.08  | 59.47  | 2.13 | 1.78E-02 | -0.16 | 9.01E-01 | 0.08  | 9.80E-01 | EGA2-1 |
| ENSMMUG00000031124  | HDHD5     | Haloacid Dehalogenase Like Hydrolase Domain Containing 5              | 0.04  | 2.73   | 3.70   | 4.90   | 7.84 | 1.57E-09 | 0.35  | 8.45E-01 | 1.34  | 5.89E-01 | EGA2-1 |
| ENSMMUG00000031121  | SLC25A18  | Solute Carrier Family 25 Member 18                                    | 0.01  | 1.08   | 0.82   | 0.25   | 7.36 | 2.40E-02 | -6.24 | 5.48E-02 | 2.95  | 6.35E-01 | EGA2-1 |
| ENSMMUG00000003272  | USP18     | Ubiquitin Specific Peptidase 18                                       | 0.32  | 2.13   | 2.45   | 0.15   | 3.47 | 3.59E-02 | -0.73 | 7.35E-01 | -2.45 | 3.51E-01 | EGA2-1 |
| ENSMMUG00000009650  | HIRA      | HIR Histone Cell Cycle Regulation Defective Homolog A (S. Cerevisiae) | 1.33  | 5.04   | 1.82   | 3.01   | 2.27 | 4.45E-02 | -1.87 | 1.03E-01 | 0.73  | 7.72E-01 | EGA2-1 |
| ENSMMUG00000031106  | UFD1      | Ubiquitin Recognition Factor In ER Associated Degradation 1           | 0.80  | 7.59   | 10.12  | 10.91  | 2.87 | 5.24E-06 | 0.47  | 5.68E-01 | 1.23  | 2.18E-01 | EGA2-1 |
| ENSMMUG00000045638  | GNB1L     | G Protein Subunit Beta 1 Like                                         | 0.05  | 0.67   | 0.49   | 0.54   | 5.80 | 3.72E-02 | -1.96 | 5.43E-01 | -1.78 | 7.71E-01 | EGA2-1 |
| ENSMMUG00000017171  | SCARF2    | Scavenger Receptor Class F Member 2                                   | 0.08  | 1.19   | 0.56   | 0.88   | 4.13 | 4.24E-03 | -1.33 | 4.33E-01 | 2.35  | 3.00E-01 | EGA2-1 |
| ENSMMUG00000022167  | PI4KA     | Phosphatidylinositol 4-kinase Alpha                                   | 2.29  | 3.98   | 5.60   | 4.13   | 1.25 | 3.50E-02 | 0.16  | 8.46E-01 | 0.19  | 9.09E-01 | EGA2-1 |
| ENSMMUG00000018798  | SDF2L1    | Stromal Cell Derived Factor 2 Like 1                                  | 0.89  | 7.95   | 11.54  | 6.09   | 2.85 | 1.08E-02 | 0.68  | 6.28E-01 | -0.45 | 8.81E-01 | EGA2-1 |
| ENSMMUG00000005624  |           |                                                                       | 0.91  | 7.03   | 25.33  | 51.69  | 3.99 | 1.54E-02 | 1.95  | 2.49E-01 | -0.51 | 9.06E-01 | EGA2-1 |
| ENSMMUG000000040606 |           |                                                                       | 0.04  | 0.23   | 0.75   | 0.72   | 5.35 | 1.67E-02 | 0.19  | 9.54E-01 | 0.68  | 9.08E-01 | EGA2-1 |
| ENSMMUG00000000264  | SNRPD3    | Small Nuclear Ribonucleoprotein D3 Polypeptide                        | 2.79  | 14.22  | 21.20  | 13.36  | 1.76 | 2.91E-02 | 0.17  | 8.80E-01 | 0.51  | 7.79E-01 | EGA2-1 |
| ENSMMUG000000021380 | AP1B1     | Adaptor Related Protein Complex 1 Beta 1 Subunit                      | 3.92  | 16.57  | 9.02   | 17.04  | 2.19 | 8.50E-04 | -1.17 | 1.02E-01 | 1.02  | 3.53E-01 | EGA2-1 |
| ENSMMUG000000023552 | THOC5     | THO Complex 5                                                         | 1.49  | 7.39   | 9.10   | 4.97   | 2.18 | 7.05E-05 | 0.44  | 5.31E-01 | -0.77 | 4.43E-01 | EGA2-1 |
| ENSMMUG000000047481 |           |                                                                       | 6.64  | 42.31  | 62.05  | 73.27  | 2.60 | 2.46E-03 | 0.77  | 4.55E-01 | 0.74  | 6.87E-01 | EGA2-1 |
| ENSMMUG00000001675  | ASCC2     | Activating Signal Cointegrator 1 Complex Subunit 2                    | 2.63  | 9.08   | 3.63   | 4.58   | 2.14 | 1.06E-02 | -1.40 | 1.12E-01 | 0.88  | 5.78E-01 | EGA2-1 |
| ENSMMUG000000042353 |           |                                                                       | 3.16  | 41.91  | 24.70  | 26.02  | 3.96 | 2.24E-05 | -1.05 | 3.52E-01 | 0.86  | 6.77E-01 | EGA2-1 |
| ENSMMUG000000021727 | DEPDC5    | DEP Domain Containing 5                                               | 0.68  | 4.27   | 1.73   | 2.56   | 2.95 | 2.67E-03 | -1.70 | 1.07E-01 | 0.43  | 8.71E-01 | EGA2-1 |
| ENSMMUG000000015258 | GCAT      | Glycine C-acetyltransferase                                           | 0.01  | 1.48   | 1.34   | 0.66   | 6.17 | 2.82E-05 | -2.10 | 2.05E-01 | 0.91  | 8.05E-01 | EGA2-1 |
| ENSMMUG000000019785 | EIF3L     | Eukaryotic Translation Initiation Factor 3 Subunit L                  | 31.53 | 77.23  | 86.57  | 83.36  | 1.37 | 7.69E-07 | 0.11  | 7.96E-01 | 0.01  | 9.93E-01 | EGA2-1 |
| ENSMMUG000000006987 |           |                                                                       | 0.84  | 8.22   | 8.01   | 3.99   | 3.68 | 5.31E-08 | -0.05 | 9.64E-01 | -0.98 | 4.35E-01 | EGA2-1 |
| ENSMMUG000000004304 | DDX17     | DEAD-box Helicase 17                                                  | 19.18 | 77.63  | 94.32  | 82.48  | 2.16 | 2.74E-07 | 0.44  | 4.10E-01 | 0.02  | 9.93E-01 | EGA2-1 |
| ENSMMUG000000012467 | FAM227A   | Family With Sequence Similarity 227 Member A                          | 0.05  | 1.42   | 0.69   | 0.41   | 5.87 | 1.54E-03 | -1.29 | 5.60E-01 | 1.61  | 6.67E-01 | EGA2-1 |
| ENSMMUG000000000364 | TOMM22    | Translocase Of Outer Mitochondrial Membrane 22                        | 15.31 | 66.51  | 87.66  | 58.08  | 2.37 | 4.08E-03 | 0.40  | 7.20E-01 | -0.72 | 6.80E-01 | EGA2-1 |
| ENSMMUG000000010029 | LOC693573 | Ribosomal Protein L3-like                                             | 52.13 | 520.79 | 241.59 | 270.20 | 3.15 | 1.88E-08 | -1.11 | 8.10E-02 | 0.61  | 6.04E-01 | EGA2-1 |
| ENSMMUG000000004496 | MIEF1     | Mitochondrial Elongation Factor 1                                     | 5.05  | 30.34  | 11.07  | 8.21   | 2.40 | 1.38E-03 | -1.37 | 9.00E-02 | 0.21  | 9.32E-01 | EGA2-1 |
| ENSMMUG000000045296 | RPS19BP1  | Ribosomal Protein S19 Binding Protein 1                               | 0.43  | 7.13   | 3.86   | 1.71   | 4.94 | 8.57E-09 | -1.65 | 8.91E-02 | 0.07  | 9.84E-01 | EGA2-1 |
| ENSMMUG000000005341 | ADSL      | Adenylosuccinate Lyase                                                | 4.99  | 15.14  | 10.21  | 10.18  | 1.72 | 4.82E-02 | -0.59 | 5.67E-01 | -0.36 | 8.70E-01 | EGA2-1 |
| ENSMMUG000000004067 | XPNPEP3   | X-prolyl Aminopeptidase 3                                             | 1.39  | 7.69   | 5.67   | 6.80   | 2.58 | 9.83E-03 | -0.72 | 5.60E-01 | 0.52  | 8.34E-01 | EGA2-1 |
| ENSMMUG000000000893 | EP300     | E1A Binding Protein P300                                              | 58.83 | 87.94  | 62.40  | 36.56  | 0.70 | 4.89E-02 | -0.66 | 6.31E-02 | -0.63 | 2.18E-01 | EGA2-1 |
| ENSMMUG000000001856 | XRCC6     | X-ray Repair Cross Complementing 6                                    | 12.67 | 48.11  | 44.95  | 43.87  | 1.89 | 9.65E-06 | 0.13  | 8.37E-01 | -0.34 | 7.32E-01 | EGA2-1 |

|                    |             |                                                                                |       |        |        |        |       |          |       |          |       |          |        |
|--------------------|-------------|--------------------------------------------------------------------------------|-------|--------|--------|--------|-------|----------|-------|----------|-------|----------|--------|
| ENSMMUG00000042546 | SNU13       | Small Nuclear Ribonucleoprotein 13                                             | 5.02  | 46.38  | 22.46  | 18.28  | 3.14  | 7.77E-07 | -0.89 | 2.41E-01 | 0.22  | 9.13E-01 | EGA2-1 |
| ENSMMUG00000007290 | C10H22orf46 | Chromosome 10 Open Reading Frame, Human C22orf46                               | 0.12  | 2.49   | 0.46   | 0.69   | 3.59  | 2.51E-02 | -2.68 | 1.02E-01 | 2.35  | 3.53E-01 | EGA2-1 |
| ENSMMUG00000002656 | TCF20       | Transcription Factor 20                                                        | 18.73 | 37.02  | 36.03  | 25.56  | 1.19  | 3.54E-02 | -0.33 | 6.39E-01 | -0.26 | 8.51E-01 | EGA2-1 |
| ENSMMUG00000004132 | NUP50       | Nucleoporin 50                                                                 | 48.05 | 132.42 | 82.86  | 87.52  | 1.45  | 6.20E-04 | -0.78 | 8.78E-02 | -0.21 | 8.53E-01 | EGA2-1 |
| ENSMMUG00000030401 | GEMIN4      | Gem Nuclear Organelle Associated Protein 4                                     | 1.91  | 8.91   | 4.62   | 2.81   | 2.50  | 6.59E-03 | -1.11 | 2.85E-01 | -0.55 | 8.05E-01 | EGA2-1 |
| ENSMMUG00000019378 | YWHAE       | Tyrosine 3-monooxygenase/tryptophan 5-monooxygenase Activation Protein Epsilon | 96.41 | 214.64 | 221.24 | 195.11 | 1.08  | 1.01E-02 | 0.17  | 7.61E-01 | 0.00  | 9.99E-01 | EGA2-1 |
| ENSMMUG00000004820 | PRPF8       | Pre-mRNA Processing Factor 8                                                   | 23.40 | 41.72  | 45.61  | 48.77  | 0.74  | 3.55E-02 | 0.23  | 5.90E-01 | -0.15 | 8.69E-01 | EGA2-1 |
| ENSMMUG00000017519 | TSR1        | TSR1, Ribosome Maturation Factor                                               | 1.18  | 19.31  | 23.30  | 10.13  | 3.97  | 6.96E-08 | 0.64  | 5.07E-01 | -1.18 | 3.67E-01 | EGA2-1 |
| ENSMMUG00000030383 |             |                                                                                | 0.10  | 4.83   | 1.70   | 1.10   | 5.25  | 1.22E-03 | -0.69 | 7.58E-01 | 0.38  | 9.47E-01 | EGA2-1 |
| ENSMMUG00000012999 | PSMB6       | Proteasome Subunit Beta 6                                                      | 2.36  | 8.24   | 10.30  | 9.17   | 1.82  | 1.13E-02 | 0.12  | 9.15E-01 | 0.00  | 9.99E-01 | EGA2-1 |
| ENSMMUG00000005666 | PLD2        | Phospholipase D2                                                               | 0.67  | 9.61   | 8.15   | 22.75  | 4.19  | 4.47E-05 | -0.92 | 4.81E-01 | 1.26  | 5.23E-01 | EGA2-1 |
| ENSMMUG00000002769 | RNF167      | Ring Finger Protein 167                                                        | 3.06  | 7.59   | 6.46   | 5.93   | 1.51  | 1.09E-02 | -0.33 | 6.73E-01 | 0.24  | 8.82E-01 | EGA2-1 |
| ENSMMUG00000006592 | C1QBP       | Complement C1q Binding Protein                                                 | 33.28 | 467.10 | 726.61 | 402.68 | 3.60  | 1.49E-07 | 0.92  | 2.70E-01 | -1.17 | 3.21E-01 | EGA2-1 |
| ENSMMUG00000006594 | DHX33       | DEAH-box Helicase 33                                                           | 1.21  | 4.88   | 10.09  | 3.59   | 2.46  | 4.45E-03 | 0.28  | 8.18E-01 | -1.00 | 5.31E-01 | EGA2-1 |
| ENSMMUG00000017760 | PIMREG      | PICALM Interacting Mitotic Regulator                                           | 0.01  | 0.96   | 1.05   | 0.27   | 5.43  | 5.89E-03 | -1.76 | 4.35E-01 | -1.16 | 8.10E-01 | EGA2-1 |
| ENSMMUG00000003788 |             |                                                                                | 1.26  | 5.18   | 4.28   | 2.25   | 2.03  | 5.46E-03 | -0.49 | 5.95E-01 | -0.11 | 9.69E-01 | EGA2-1 |
| ENSMMUG00000010543 | PHF23       | PHD Finger Protein 23                                                          | 4.77  | 21.56  | 6.73   | 4.99   | 2.01  | 2.28E-02 | -1.64 | 6.82E-02 | 0.13  | 9.68E-01 | EGA2-1 |
| ENSMMUG00000010551 | CLDN7       | Claudin 7                                                                      | 0.01  | 0.62   | 2.27   | 13.16  | 4.61  | 2.10E-02 | 0.64  | 8.04E-01 | 1.86  | 5.99E-01 | EGA2-1 |
| ENSMMUG00000006206 | EIF5A       | Eukaryotic Translation Initiation Factor 5A                                    | 3.14  | 15.48  | 14.19  | 14.78  | 2.20  | 2.92E-04 | -0.35 | 6.69E-01 | 0.26  | 8.84E-01 | EGA2-1 |
| ENSMMUG00000043527 | GPS2        | G Protein Pathway Suppressor 2                                                 | 0.15  | 1.45   | 3.09   | 2.00   | 3.71  | 1.46E-04 | 1.16  | 3.15E-01 | 0.19  | 9.60E-01 | EGA2-1 |
| ENSMMUG00000030346 |             |                                                                                | 73.23 | 310.33 | 418.69 | 414.53 | 1.93  | 1.32E-04 | 0.73  | 2.10E-01 | -0.27 | 8.37E-01 | EGA2-1 |
| ENSMMUG00000009709 |             |                                                                                | 0.06  | 1.89   | 0.52   | 1.56   | 7.55  | 4.22E-04 | -2.41 | 3.18E-01 | 4.14  | 1.99E-01 | EGA2-1 |
| ENSMMUG00000013499 | LOC695050   | Eukaryotic Initiation Factor 4A-I                                              | 10.13 | 160.11 | 134.21 | 130.03 | 4.12  | 9.74E-23 | -0.20 | 7.64E-01 | 0.06  | 9.73E-01 | EGA2-1 |
| ENSMMUG00000013536 | PFAS        | Phosphoribosylformylglycinamide Synthase                                       | 0.51  | 2.71   | 4.57   | 5.47   | 2.59  | 5.29E-03 | -0.07 | 9.62E-01 | 1.91  | 1.51E-01 | EGA2-1 |
| ENSMMUG00000013540 | RANGRF      | RAN Guanine Nucleotide Release Factor                                          | 1.81  | 16.29  | 8.75   | 4.77   | 3.18  | 1.28E-02 | -1.89 | 1.68E-01 | 0.05  | 9.92E-01 | EGA2-1 |
| ENSMMUG00000013544 | SLC25A35    | Solute Carrier Family 25 Member 35                                             | 0.19  | 3.62   | 1.81   | 0.98   | 5.22  | 2.50E-03 | -1.93 | 3.28E-01 | -1.55 | 6.59E-01 | EGA2-1 |
| ENSMMUG00000036288 | MIR762-2    | MicroRNA 762-2                                                                 | 0.03  | 5.01   | 1.09   | 2.17   | 9.94  | 1.49E-02 | -7.12 | 9.25E-02 | 3.55  | 6.67E-01 | EGA2-1 |
| ENSMMUG00000019283 |             |                                                                                | 41.02 | 177.56 | 307.55 | 312.59 | 2.10  | 1.13E-06 | 0.87  | 7.15E-02 | 0.17  | 9.01E-01 | EGA2-1 |
| ENSMMUG00000047718 | LRRC75A     | Leucine Rich Repeat Containing 75A                                             | 0.58  | 8.85   | 8.17   | 9.50   | 4.02  | 2.21E-11 | -0.44 | 5.90E-01 | 0.66  | 6.07E-01 | EGA2-1 |
| ENSMMUG00000030296 | PIGL        | Phosphatidylinositol Glycan Anchor Biosynthesis Class L                        | 0.14  | 1.89   | 0.24   | 1.14   | 4.94  | 1.04E-02 | -3.10 | 1.07E-01 | 3.98  | 1.20E-01 | EGA2-1 |
| ENSMMUG00000018359 | MIEF2       | Mitochondrial Elongation Factor 2                                              | 0.09  | 0.58   | 1.05   | 1.29   | 3.82  | 4.62E-02 | 1.38  | 5.33E-01 | 1.62  | 6.68E-01 | EGA2-1 |
| ENSMMUG00000005325 | SLC5A10     | Solute Carrier Family 5 Member 10                                              | 0.03  | 2.49   | 3.74   | 0.63   | 8.18  | 2.93E-14 | -0.35 | 8.13E-01 | -0.73 | 7.69E-01 | EGA2-1 |
| ENSMMUG00000001328 | ALDH3A1     | Aldehyde Dehydrogenase 3 Family Member A1                                      | 0.00  | 0.20   | 1.18   | 0.01   | 27.11 | 2.52E-23 | 0.71  | 8.67E-01 | -0.67 | 9.47E-01 | EGA2-1 |
| ENSMMUG00000021156 | ULK2        | Unc-51 Like Autophagy Activating Kinase 2                                      | 6.40  | 20.76  | 14.11  | 7.15   | 1.50  | 2.02E-02 | -0.63 | 3.90E-01 | -0.87 | 4.18E-01 | EGA2-1 |
| ENSMMUG00000021593 |             |                                                                                | 32.74 | 134.17 | 206.34 | 130.65 | 2.23  | 5.68E-10 | 0.60  | 1.55E-01 | -0.65 | 2.85E-01 | EGA2-1 |
| ENSMMUG00000040830 |             |                                                                                | 0.08  | 2.38   | 0.66   | 0.45   | 5.50  | 3.70E-02 | -3.67 | 1.73E-01 | 2.60  | 5.94E-01 | EGA2-1 |
| ENSMMUG00000020226 |             |                                                                                | 3.59  | 45.69  | 38.71  | 49.59  | 3.76  | 1.42E-08 | -0.22 | 8.29E-01 | 0.43  | 8.04E-01 | EGA2-1 |
| ENSMMUG00000019151 | SLC46A1     | Solute Carrier Family 46 Member 1                                              | 0.08  | 1.19   | 1.02   | 0.54   | 4.83  | 1.84E-03 | -0.66 | 7.54E-01 | 1.97  | 4.76E-01 | EGA2-1 |

|                    |              |                                                                 |        |        |        |        |       |          |       |          |       |          |        |
|--------------------|--------------|-----------------------------------------------------------------|--------|--------|--------|--------|-------|----------|-------|----------|-------|----------|--------|
| ENSMMUG00000012240 | PIGS         | Phosphatidylinositol Glycan Anchor Biosynthesis Class S         | 2.38   | 9.48   | 5.37   | 8.18   | 2.55  | 2.76E-03 | -0.91 | 3.60E-01 | 0.53  | 7.96E-01 | EGA2-1 |
| ENSMMUG00000023411 | SGK494       | Putative Serine/threonine protein Kinase Sgk494                 | 0.23   | 1.89   | 6.65   | 7.15   | 3.44  | 1.94E-02 | 1.30  | 4.42E-01 | 1.85  | 4.57E-01 | EGA2-1 |
| ENSMMUG00000023413 | SDF2         | Stromal Cell Derived Factor 2                                   | 1.83   | 11.05  | 5.58   | 4.52   | 2.03  | 2.44E-02 | -0.07 | 9.62E-01 | -0.47 | 8.29E-01 | EGA2-1 |
| ENSMMUG00000018010 | LOC706606    | 60S Ribosomal Protein L23a-like                                 | 230.72 | 971.59 | 860.39 | 780.77 | 2.09  | 4.33E-09 | -0.07 | 9.03E-01 | -0.23 | 8.04E-01 | EGA2-1 |
| ENSMMUG00000021407 | TRAF4        | TNF Receptor Associated Factor 4                                | 0.14   | 4.23   | 5.10   | 7.94   | 6.06  | 1.38E-08 | -0.89 | 5.02E-01 | 1.80  | 3.04E-01 | EGA2-1 |
| ENSMMUG00000009069 | CRLF3        | Cytokine Receptor Like Factor 3                                 | 1.42   | 48.71  | 13.85  | 13.00  | 4.61  | 2.05E-10 | -1.20 | 1.61E-01 | -0.21 | 9.32E-01 | EGA2-1 |
| ENSMMUG00000009077 | ADAP2        | ArfGAP With Dual PH Domains 2                                   | 0.04   | 5.74   | 6.92   | 4.01   | 9.95  | 1.39E-08 | 0.32  | 8.97E-01 | -0.52 | 9.17E-01 | EGA2-1 |
| ENSMMUG00000015027 | LOC100425072 | 40S Ribosomal Protein S27-like                                  | 29.67  | 141.20 | 202.01 | 202.83 | 2.24  | 1.11E-05 | 0.24  | 7.39E-01 | 0.25  | 8.58E-01 | EGA2-1 |
| ENSMMUG00000020401 | COPRS        | Coordinator Of PRMT5 And Differentiation Stimulator             | 0.25   | 2.75   | 5.67   | 5.65   | 3.07  | 4.92E-04 | 1.20  | 2.31E-01 | -0.10 | 9.76E-01 | EGA2-1 |
| ENSMMUG00000020403 | UTP6         | UTP6, Small Subunit Processome Component                        | 0.65   | 15.75  | 21.96  | 8.16   | 4.51  | 2.29E-09 | 0.51  | 6.26E-01 | -0.60 | 7.47E-01 | EGA2-1 |
| ENSMMUG00000027249 | MIR632       | MicroRNA 632                                                    | 22.00  | 50.53  | 55.18  | 36.50  | 1.32  | 3.76E-02 | 0.32  | 6.93E-01 | -1.02 | 2.96E-01 | EGA2-1 |
| ENSMMUG00000016875 | ZNF207       | Zinc Finger Protein 207                                         | 27.77  | 64.08  | 57.53  | 36.84  | 1.05  | 1.31E-03 | 0.09  | 8.46E-01 | -0.55 | 2.92E-01 | EGA2-1 |
| ENSMMUG00000043217 |              |                                                                 | 0.00   | 0.33   | 5.53   | 6.44   | 24.39 | 6.03E-08 | -0.42 | 9.56E-01 | 5.96  | 4.88E-01 | EGA2-1 |
| ENSMMUG00000004725 | SRSF1        | Serine And Arginine Rich Splicing Factor 1                      | 41.91  | 118.38 | 70.73  | 74.91  | 1.25  | 2.74E-02 | -0.88 | 1.34E-01 | 0.19  | 9.03E-01 | EGA2-1 |
| ENSMMUG00000041784 |              |                                                                 | 17.92  | 80.05  | 34.73  | 44.03  | 2.38  | 4.06E-05 | -0.79 | 2.50E-01 | 0.44  | 7.54E-01 | EGA2-1 |
| ENSMMUG00000001913 | MRPS23       | Mitochondrial Ribosomal Protein S23                             | 19.52  | 85.33  | 75.70  | 31.58  | 1.75  | 4.53E-02 | 0.50  | 6.40E-01 | -1.34 | 3.12E-01 | EGA2-1 |
| ENSMMUG00000044447 |              |                                                                 | 0.25   | 1.99   | 1.65   | 0.40   | 3.36  | 6.43E-03 | -0.88 | 5.66E-01 | -1.28 | 5.95E-01 | EGA2-1 |
| ENSMMUG00000010548 | COX11        | COX11 Homolog, Cytochrome C Oxidase Assembly Protein            | 0.63   | 3.10   | 9.48   | 6.43   | 2.23  | 2.76E-02 | 1.35  | 2.13E-01 | -0.06 | 9.86E-01 | EGA2-1 |
| ENSMMUG00000001940 | NME1         | Non-metastatic Cells 1, Protein (NM23A) Expressed In            | 0.91   | 10.04  | 19.62  | 19.53  | 3.34  | 3.60E-06 | 1.46  | 6.81E-02 | -0.26 | 9.06E-01 | EGA2-1 |
| ENSMMUG00000022528 | SPAG9        | Sperm Associated Antigen 9                                      | 4.94   | 14.46  | 21.19  | 21.61  | 1.51  | 1.79E-04 | 0.29  | 5.84E-01 | 0.09  | 9.52E-01 | EGA2-1 |
| ENSMMUG00000010117 | LUC7L3       | LUC7 Like 3 Pre-mRNA Splicing Factor                            | 26.26  | 90.34  | 107.35 | 53.74  | 1.62  | 6.20E-06 | 0.31  | 4.99E-01 | -0.74 | 1.89E-01 | EGA2-1 |
| ENSMMUG00000001469 | TMEM92       | Transmembrane Protein 92                                        | 0.01   | 19.89  | 12.78  | 1.68   | 11.64 | 5.11E-13 | -1.18 | 5.14E-01 | -2.29 | 3.61E-01 | EGA2-1 |
| ENSMMUG00000021087 | SNF8         | SNF8, ESCRT-II Complex Subunit                                  | 3.23   | 36.73  | 27.74  | 31.95  | 3.58  | 3.40E-08 | 0.03  | 9.77E-01 | -0.12 | 9.64E-01 | EGA2-1 |
| ENSMMUG00000016305 | LOC106992303 | 40S Ribosomal Protein S15a Pseudogene                           | 45.95  | 210.55 | 349.80 | 216.70 | 2.39  | 1.94E-12 | 0.72  | 6.30E-02 | -0.71 | 2.02E-01 | EGA2-1 |
| ENSMMUG00000019760 | KPNB1        | Karyopherin Subunit Beta 1                                      | 27.68  | 77.06  | 76.79  | 101.68 | 1.41  | 3.49E-04 | 0.31  | 5.37E-01 | 0.02  | 9.91E-01 | EGA2-1 |
| ENSMMUG00000013378 | EPOP         | Elongin BC And Polycomb Repressive Complex 2 Associated Protein | 0.15   | 6.28   | 3.03   | 0.56   | 5.41  | 1.64E-03 | -1.69 | 3.97E-01 | -1.23 | 7.53E-01 | EGA2-1 |
| ENSMMUG00000012363 | PSMB3        | Proteasome Subunit Beta 3                                       | 5.57   | 27.11  | 18.52  | 18.32  | 2.26  | 3.05E-02 | -0.97 | 4.17E-01 | 0.12  | 9.74E-01 | EGA2-1 |
| ENSMMUG00000009132 | MED1         | Mediator Complex Subunit 1                                      | 3.06   | 22.46  | 14.09  | 11.66  | 2.90  | 2.71E-11 | -0.54 | 3.25E-01 | -0.03 | 9.86E-01 | EGA2-1 |
| ENSMMUG00000001347 | PGAP3        | Post-GPI Attachment To Proteins 3                               | 0.04   | 0.48   | 1.42   | 0.59   | 5.10  | 1.24E-02 | 1.37  | 5.67E-01 | -0.76 | 8.88E-01 | EGA2-1 |
| ENSMMUG00000002926 | MED24        | Mediator Complex Subunit 24                                     | 1.14   | 3.53   | 3.67   | 5.81   | 1.72  | 2.38E-02 | 0.62  | 4.89E-01 | 0.53  | 7.51E-01 | EGA2-1 |
| ENSMMUG00000002933 | NR1D1        | Nuclear Receptor Subfamily 1 Group D Member 1                   | 1.52   | 2.62   | 1.78   | 0.49   | 3.46  | 1.84E-02 | 0.18  | 9.38E-01 | -2.38 | 2.97E-01 | EGA2-1 |

|                      |             |                                                  |       |        |        |        |      |          |       |          |       |          |        |
|----------------------|-------------|--------------------------------------------------|-------|--------|--------|--------|------|----------|-------|----------|-------|----------|--------|
| ENSMMUG00000008941   | TOP2A       | DNA Topoisomerase II Alpha                       | 21.23 | 48.75  | 44.52  | 70.60  | 1.09 | 2.84E-02 | -0.07 | 9.24E-01 | 0.67  | 4.15E-01 | EGA2-1 |
| ENSMMUG00000001500   | KRT10       | Keratin 10                                       | 0.33  | 6.81   | 1.41   | 0.99   | 4.60 | 3.62E-04 | -2.53 | 6.93E-02 | -0.09 | 9.86E-01 | EGA2-1 |
| ENSMMUG000000049151  | EIF1        | Eukaryotic Translation Initiation Factor 1       | 76.74 | 347.16 | 268.12 | 103.41 | 2.22 | 5.75E-05 | -0.59 | 3.86E-01 | -1.22 | 1.38E-01 | EGA2-1 |
| ENSMMUG000000016118  | DNAJC7      | DnaJ Heat Shock Protein Family (Hsp40) Member C7 | 22.70 | 79.08  | 78.06  | 53.85  | 1.92 | 2.56E-05 | -0.18 | 7.85E-01 | -0.31 | 7.80E-01 | EGA2-1 |
| ENSMMUG000000014123  | AARSD1      | Alanyl-tRNA Synthetase Domain Containing 1       | 1.18  | 5.94   | 5.08   | 3.39   | 2.66 | 2.59E-03 | -0.74 | 4.96E-01 | -0.55 | 7.97E-01 | EGA2-1 |
| ENSMMUG000000029945  | CD300LG     | CD300 Molecule Like Family Member G              | 17.37 | 102.59 | 179.19 | 186.37 | 2.75 | 1.85E-05 | 0.97  | 1.90E-01 | 0.68  | 6.08E-01 | EGA2-1 |
| ENSMMUG00000006804   | LSM12       | LSM12 Homolog                                    | 22.36 | 87.35  | 67.91  | 51.10  | 1.85 | 1.11E-05 | -0.31 | 5.74E-01 | 0.08  | 9.62E-01 | EGA2-1 |
| ENSMMUG000000019923  | ATXN7L3     | Ataxin 7 Like 3                                  | 0.27  | 3.05   | 3.24   | 8.51   | 4.26 | 4.13E-05 | 0.27  | 8.63E-01 | 0.89  | 7.02E-01 | EGA2-1 |
| ENSMMUG000000048920  |             |                                                  | 19.07 | 49.72  | 31.46  | 21.67  | 1.68 | 1.48E-03 | -0.98 | 8.31E-02 | -0.69 | 4.74E-01 | EGA2-1 |
| ENSMMUG00000001572   | PTRH2       | Peptidyl-tRNA Hydrolase 2                        | 6.56  | 18.64  | 15.95  | 9.86   | 1.71 | 4.93E-02 | -0.60 | 5.57E-01 | -0.89 | 5.67E-01 | EGA2-1 |
| ENSMMUG000000007671  | HEATR6      | HEAT Repeat Containing 6                         | 0.50  | 6.82   | 9.06   | 5.97   | 3.28 | 1.03E-05 | 1.14  | 1.86E-01 | -0.93 | 5.16E-01 | EGA2-1 |
| ENSMMUG000000009802  | METTL2A     | Methyltransferase Like 2A                        | 2.35  | 13.04  | 16.95  | 10.48  | 2.30 | 1.73E-03 | 0.75  | 3.91E-01 | -0.18 | 9.45E-01 | EGA2-1 |
| ENSMMUG000000016761  | CCDC47      | Coiled-coil Domain Containing 47                 | 3.89  | 8.99   | 15.20  | 16.31  | 1.20 | 3.93E-02 | 0.67  | 2.86E-01 | 0.25  | 8.67E-01 | EGA2-1 |
| ENSMMUG000000016768  | FTSJ3       | FtsJ RNA Methyltransferase Homolog 3             | 10.89 | 41.55  | 39.43  | 20.20  | 2.32 | 6.53E-06 | -0.77 | 2.00E-01 | -0.14 | 9.41E-01 | EGA2-1 |
| ENSMMUG000000009463  | DDX5        | DEAD-box Helicase 5                              | 25.77 | 62.94  | 50.51  | 51.65  | 1.29 | 1.51E-04 | -0.10 | 8.44E-01 | -0.26 | 7.43E-01 | EGA2-1 |
| ENSMMUG000000044760  |             |                                                  | 3.17  | 17.41  | 12.02  | 21.18  | 3.81 | 2.91E-03 | -1.40 | 3.38E-01 | 1.33  | 5.95E-01 | EGA2-1 |
| ENSMMUG000000002132  | PSMD12      | Proteasome 26S Subunit, Non-ATPase 12            | 23.28 | 78.90  | 92.34  | 68.59  | 1.56 | 1.45E-04 | 0.17  | 7.75E-01 | 0.30  | 7.59E-01 | EGA2-1 |
| ENSMMUG000000002414  | NOL11       | Nucleolar Protein 11                             | 0.60  | 22.30  | 34.40  | 20.98  | 5.04 | 4.32E-15 | 1.01  | 1.96E-01 | -0.54 | 7.29E-01 | EGA2-1 |
| ENSMMUG000000009734  | BPTF        | Bromodomain PHD Finger Transcription Factor      | 16.29 | 40.07  | 50.34  | 43.06  | 1.05 | 1.49E-02 | 0.59  | 2.07E-01 | -0.27 | 7.89E-01 | EGA2-1 |
| ENSMMUG000000003076  |             |                                                  | 6.45  | 19.39  | 29.79  | 27.81  | 1.96 | 3.76E-06 | 0.32  | 5.67E-01 | -0.14 | 9.12E-01 | EGA2-1 |
| ENSMMUG000000001269  | C16H17orf80 | Chromosome 16 Open Reading Frame, Human C17orf80 | 3.26  | 18.36  | 14.65  | 11.81  | 2.28 | 2.48E-03 | -0.50 | 6.04E-01 | -0.33 | 8.71E-01 | EGA2-1 |
| ENSMMUG000000005733  | RAB37       | RAB37, Member RAS Oncogene Family                | 0.00  | 0.06   | 1.40   | 1.26   | 4.32 | 3.46E-02 | 2.78  | 1.42E-01 | 1.97  | 5.51E-01 | EGA2-1 |
| ENSMMUG000000011644  | MRPL58      | Mitochondrial Ribosomal Protein L58              | 0.40  | 11.34  | 12.29  | 16.11  | 5.21 | 1.34E-11 | 0.39  | 7.27E-01 | 0.29  | 9.02E-01 | EGA2-1 |
| ENSMMUG000000004756  | GRB2        | Growth Factor Receptor Bound Protein 2           | 1.95  | 16.27  | 15.57  | 21.52  | 2.92 | 6.17E-04 | -0.12 | 9.31E-01 | 0.55  | 7.91E-01 | EGA2-1 |
| ENSMMUG000000016775  | FBF1        | Fas Binding Factor 1                             | 0.03  | 0.49   | 0.75   | 1.22   | 5.08 | 9.04E-04 | 1.71  | 2.90E-01 | -1.57 | 5.61E-01 | EGA2-1 |
| ENSMMUG000000022413  | SRSF2       | Serine And Arginine Rich Splicing Factor 2       | 0.95  | 14.11  | 13.97  | 13.46  | 4.25 | 4.24E-04 | -1.05 | 4.82E-01 | -0.70 | 8.17E-01 | EGA2-1 |
| ENSMMUG000000021864  | SYNGR2      | Synaptogyrin 2                                   | 2.67  | 12.12  | 16.83  | 5.36   | 2.95 | 1.96E-03 | 0.13  | 9.32E-01 | -1.63 | 2.78E-01 | EGA2-1 |
| ENSMMUG000000021867  | TK1         | Thymidine Kinase 1                               | 2.02  | 7.25   | 5.04   | 2.87   | 2.27 | 4.70E-02 | -1.35 | 2.77E-01 | -1.50 | 4.26E-01 | EGA2-1 |
| ENSMMUG000000001586  | NPLOC4      | NPL4 Homolog, Ubiquitin Recognition Factor       | 0.67  | 2.34   | 4.94   | 6.65   | 2.14 | 3.93E-02 | 1.15  | 3.12E-01 | 0.62  | 7.94E-01 | EGA2-1 |
| ENSMMUG000000012884  | ALYREF      | Aly/REF Export Factor                            | 14.11 | 56.67  | 34.84  | 36.70  | 1.88 | 3.39E-03 | -0.99 | 1.59E-01 | -0.11 | 9.65E-01 | EGA2-1 |
| ENSMMUG000000029310  | HBA         | Hemoglobin, Alpha 2                              | 0.22  | 2.36   | 5.46   | 2.10   | 3.95 | 8.26E-04 | -1.05 | 4.61E-01 | 1.33  | 5.55E-01 | EGA2-1 |
| ENSMMUG0000000042961 | HBA1        | Hemoglobin Subunit Alpha 1                       | 0.03  | 1.25   | 3.12   | 0.14   | 3.68 | 4.06E-03 | -2.56 | 5.68E-02 | 0.43  | 9.12E-01 | EGA2-1 |
| ENSMMUG000000000596  | LUC7L       | LUC7 Like                                        | 1.64  | 7.38   | 8.14   | 5.28   | 1.59 | 1.06E-02 | 0.19  | 8.29E-01 | -0.32 | 8.37E-01 | EGA2-1 |
| ENSMMUG0000000022010 | RHOT2       | Ras Homolog Family Member T2                     | 0.18  | 1.37   | 2.52   | 2.30   | 3.28 | 1.47E-02 | 2.06  | 1.45E-01 | 0.27  | 9.53E-01 | EGA2-1 |
| ENSMMUG000000006428  | TSR3        | TSR3, Acp Transferase Ribosome Maturation Factor | 0.13  | 3.66   | 1.77   | 3.26   | 5.23 | 8.72E-03 | -0.55 | 8.44E-01 | 0.76  | 8.91E-01 | EGA2-1 |



|                     |             |                                                                       |        |         |         |        |       |          |       |          |       |          |        |
|---------------------|-------------|-----------------------------------------------------------------------|--------|---------|---------|--------|-------|----------|-------|----------|-------|----------|--------|
| ENSMMUG00000029268  | NDUFB10     | NADH:ubiquinone Oxidoreductase Subunit B10                            | 1.19   | 13.42   | 13.84   | 22.21  | 3.38  | 6.38E-07 | -0.01 | 9.96E-01 | -0.20 | 9.32E-01 | EGA2-1 |
| ENSMMUG00000007943  | TBL3        | Transducin Beta Like 3                                                | 0.24   | 4.68    | 3.41    | 3.53   | 3.93  | 4.48E-04 | 0.04  | 9.84E-01 | -0.33 | 9.25E-01 | EGA2-1 |
| ENSMMUG00000002843  | RAB26       | RAB26, Member RAS Oncogene Family                                     | 0.24   | 4.28    | 7.86    | 7.51   | 5.54  | 9.55E-09 | 0.17  | 9.08E-01 | -0.19 | 9.60E-01 | EGA2-1 |
| ENSMMUG000000041036 |             |                                                                       | 0.01   | 0.90    | 0.17    | 0.95   | 7.70  | 1.72E-02 | -1.70 | 6.81E-01 | -0.41 | 9.72E-01 | EGA2-1 |
| ENSMMUG00000018711  | NAA60       | N(alpha)-acetyltransferase 60, NatF Catalytic Subunit                 | 7.74   | 29.94   | 36.83   | 9.37   | 1.47  | 3.53E-02 | 0.59  | 4.64E-01 | -1.56 | 8.88E-02 | EGA2-1 |
| ENSMMUG00000017973  | ZNF263      | Zinc Finger Protein 263                                               | 0.24   | 1.95    | 1.97    | 0.93   | 2.62  | 1.20E-02 | -0.16 | 9.19E-01 | -0.98 | 6.38E-01 | EGA2-1 |
| ENSMMUG00000017972  | ZNF200      | Zinc Finger Protein 200                                               | 2.40   | 14.91   | 6.28    | 7.96   | 2.26  | 2.31E-02 | -0.69 | 5.66E-01 | -0.83 | 6.85E-01 | EGA2-1 |
| ENSMMUG00000004214  | PKMYT1      | Protein Kinase, Membrane Associated Tyrosine/threonine 1              | 0.19   | 2.17    | 0.66    | 2.90   | 4.42  | 2.49E-03 | -2.16 | 1.81E-01 | 2.49  | 2.78E-01 | EGA2-1 |
| ENSMMUG000000045123 | ELOB        | Elongin B                                                             | 1.72   | 34.63   | 38.73   | 23.10  | 4.61  | 2.31E-08 | 0.19  | 8.85E-01 | -0.51 | 8.12E-01 | EGA2-1 |
| ENSMMUG00000006499  | PAM16       | Presequence Translocase Associated Motor 16                           | 2.42   | 9.79    | 7.92    | 8.08   | 2.06  | 7.14E-03 | -0.41 | 6.81E-01 | -0.67 | 6.70E-01 | EGA2-1 |
| ENSMMUG000000039610 |             |                                                                       | 0.00   | 1.76    | 10.06   | 1.79   | 26.14 | 7.84E-24 | 4.62  | 1.15E-01 | -1.79 | 7.85E-01 | EGA2-1 |
| ENSMMUG00000011001  | ANKS3       | Ankyrin Repeat And Sterile Alpha Motif Domain Containing 3            | 0.20   | 1.17    | 1.91    | 0.84   | 3.50  | 6.80E-03 | -0.47 | 7.95E-01 | 0.62  | 8.52E-01 | EGA2-1 |
| ENSMMUG000000029237 |             |                                                                       | 68.13  | 214.58  | 179.70  | 187.97 | 1.77  | 1.95E-05 | -0.34 | 5.20E-01 | -0.06 | 9.72E-01 | EGA2-1 |
| ENSMMUG000000004059 |             |                                                                       | 4.93   | 18.58   | 14.42   | 5.43   | 1.91  | 4.63E-04 | -0.31 | 6.80E-01 | -1.27 | 1.01E-01 | EGA2-1 |
| ENSMMUG00000010953  | PRM2        | Protamine 2                                                           | 0.01   | 4.93    | 0.95    | 0.05   | 7.64  | 2.17E-02 | -2.67 | 4.83E-01 | -3.81 | 5.18E-01 | EGA2-1 |
| ENSMMUG000000021520 |             |                                                                       | 0.03   | 2.65    | 0.41    | 1.62   | 5.98  | 2.17E-02 | -2.76 | 3.32E-01 | 1.76  | 7.55E-01 | EGA2-1 |
| ENSMMUG000000002991 | RRN3        | RRN3 Homolog, RNA Polymerase I Transcription Factor                   | 2.15   | 10.73   | 3.18    | 2.69   | 1.91  | 3.23E-02 | -1.20 | 2.08E-01 | -0.19 | 9.49E-01 | EGA2-1 |
| ENSMMUG00000018035  | MARF1       | Meiosis Regulator And MRNA Stability Factor 1                         | 2.11   | 14.81   | 15.17   | 9.94   | 2.77  | 3.14E-09 | -0.04 | 9.58E-01 | -0.41 | 7.07E-01 | EGA2-1 |
| ENSMMUG000000005593 |             |                                                                       | 55.70  | 165.82  | 171.42  | 121.94 | 1.59  | 1.01E-06 | -0.15 | 7.47E-01 | -0.44 | 4.75E-01 | EGA2-1 |
| ENSMMUG00000016746  | ERI2        | ERI1 Exoribonuclease Family Member 2                                  | 1.54   | 5.66    | 10.76   | 16.36  | 2.00  | 1.08E-02 | 0.65  | 4.91E-01 | 0.79  | 6.01E-01 | EGA2-1 |
| ENSMMUG00000016748  | REXO5       | RNA Exonuclease 5                                                     | 0.10   | 2.89    | 1.29    | 2.58   | 4.28  | 1.84E-03 | -1.25 | 4.52E-01 | 0.93  | 7.74E-01 | EGA2-1 |
| ENSMMUG00000020521  | GGA2        | Golgi Associated, Gamma Adaptin Ear Containing, ARF Binding Protein 2 | 3.26   | 8.58    | 7.90    | 21.02  | 1.97  | 2.99E-02 | -0.79 | 4.50E-01 | 1.82  | 1.44E-01 | EGA2-1 |
| ENSMMUG00000017305  | DCTN5       | Dynactin Subunit 5                                                    | 4.74   | 13.84   | 11.03   | 11.19  | 1.47  | 2.70E-02 | -0.36 | 6.66E-01 | 0.46  | 7.51E-01 | EGA2-1 |
| ENSMMUG00000015908  | RBBP6       | RB Binding Protein 6, Ubiquitin Ligase                                | 2.02   | 56.88   | 75.82   | 36.86  | 4.96  | 3.36E-20 | 0.59  | 4.05E-01 | -0.94 | 3.31E-01 | EGA2-1 |
| ENSMMUG000000005139 |             |                                                                       | 616.21 | 1649.74 | 1572.21 | 979.76 | 1.30  | 1.69E-05 | -0.09 | 8.53E-01 | -0.46 | 3.86E-01 | EGA2-1 |
| ENSMMUG000000008254 | GTF3C1      | General Transcription Factor IIIC Subunit 1                           | 6.96   | 27.73   | 28.47   | 15.07  | 2.10  | 2.15E-03 | -0.27 | 7.77E-01 | -0.64 | 6.53E-01 | EGA2-1 |
| ENSMMUG000000003303 | TUFM        | Tu Translation Elongation Factor, Mitochondrial                       | 1.17   | 8.60    | 10.92   | 17.31  | 2.89  | 3.00E-05 | 0.66  | 4.51E-01 | 0.80  | 5.60E-01 | EGA2-1 |
| ENSMMUG000000000983 | ALDOA       | Aldolase, Fructose-bisphosphate A                                     | 4.44   | 33.67   | 38.46   | 40.26  | 3.06  | 1.46E-06 | 0.17  | 8.64E-01 | -0.37 | 8.26E-01 | EGA2-1 |
| ENSMMUG000000000700 | CLN3        | CLN3, Battenin                                                        | 0.44   | 6.56    | 2.45    | 3.88   | 3.77  | 1.29E-04 | -1.85 | 8.64E-02 | 1.22  | 5.13E-01 | EGA2-1 |
| ENSMMUG00000011798  | LOC705696   | Eukaryotic Translation Initiation Factor 3 Subunit C                  | 13.97  | 45.82   | 37.25   | 37.19  | 1.55  | 2.15E-05 | -0.01 | 9.86E-01 | -0.57 | 3.72E-01 | EGA2-1 |
| ENSMMUG000000021210 | C20H16orf54 | Chromosome 20 Open Reading Frame, Human C16orf54                      | 0.02   | 0.83    | 5.34    | 1.01   | 4.60  | 5.88E-03 | 2.93  | 8.70E-02 | -2.26 | 4.22E-01 | EGA2-1 |
| ENSMMUG000000021844 | CD2BP2      | CD2 Cytoplasmic Tail Binding Protein 2                                | 0.79   | 4.30    | 3.69    | 4.25   | 2.34  | 6.00E-03 | -0.30 | 8.05E-01 | -0.11 | 9.73E-01 | EGA2-1 |
| ENSMMUG000000029159 | ZNF48       | Zinc Finger Protein 48                                                | 0.06   | 2.23    | 0.58    | 1.68   | 6.53  | 3.04E-06 | -2.38 | 1.24E-01 | 1.43  | 6.23E-01 | EGA2-1 |
| ENSMMUG000000041420 | DCTPP1      | DCTP Pyrophosphatase 1                                                | 2.92   | 7.96    | 11.04   | 4.35   | 1.64  | 4.11E-02 | 0.23  | 8.39E-01 | -0.17 | 9.48E-01 | EGA2-1 |
| ENSMMUG00000018986  | SEZ6L2      | Seizure Related 6 Homolog Like 2                                      | 0.08   | 0.85    | 0.58    | 0.32   | 4.99  | 9.26E-03 | -0.95 | 6.99E-01 | -0.30 | 9.65E-01 | EGA2-1 |
| ENSMMUG00000010556  | SRCAP       | Snf2 Related CREBBP Activator Protein                                 | 13.84  | 31.02   | 27.28   | 26.29  | 1.07  | 1.66E-03 | -0.05 | 9.25E-01 | -0.32 | 6.53E-01 | EGA2-1 |

|                     |             |                                                                          |        |        |        |        |      |          |       |          |       |          |        |
|---------------------|-------------|--------------------------------------------------------------------------|--------|--------|--------|--------|------|----------|-------|----------|-------|----------|--------|
| ENSMMUG0000003233   | SETD1A      | SET Domain Containing 1A                                                 | 2.90   | 10.49  | 12.20  | 4.32   | 1.81 | 1.80E-03 | -0.19 | 8.24E-01 | -0.68 | 5.28E-01 | EGA2-1 |
| ENSMMUG0000003236   | STX1B       | Syntaxin 1B                                                              | 0.09   | 2.32   | 1.48   | 1.01   | 3.75 | 5.17E-03 | -0.40 | 8.34E-01 | 0.17  | 9.73E-01 | EGA2-1 |
| ENSMMUG00000019637  | FUS         | FUS RNA Binding Protein                                                  | 45.58  | 133.22 | 87.49  | 82.23  | 1.52 | 1.41E-04 | -0.49 | 2.94E-01 | -0.11 | 9.31E-01 | EGA2-1 |
| ENSMMUG0000002417   |             |                                                                          | 0.88   | 4.40   | 13.46  | 14.96  | 2.45 | 2.11E-02 | 1.21  | 3.00E-01 | 0.00  | 9.99E-01 | EGA2-1 |
| ENSMMUG00000048906  | LOC716072   | Zinc Finger Protein 91-like                                              | 3.83   | 13.96  | 20.23  | 9.54   | 2.02 | 3.79E-03 | 0.37  | 6.95E-01 | -0.24 | 9.08E-01 | EGA2-1 |
| ENSMMUG00000008365  | CNEP1R1     | CTD Nuclear Envelope Phosphatase 1 Regulatory Subunit 1                  | 0.03   | 31.46  | 7.37   | 5.34   | 8.82 | 1.44E-08 | -2.32 | 1.62E-01 | 2.41  | 3.49E-01 | EGA2-1 |
| ENSMMUG00000020065  | HEATR3      | HEAT Repeat Containing 3                                                 | 1.50   | 9.07   | 22.00  | 11.73  | 2.57 | 1.09E-04 | 1.28  | 7.71E-02 | -0.32 | 8.61E-01 | EGA2-1 |
| ENSMMUG00000041524  | LOC694967   | 40S Ribosomal Protein S27-like                                           | 35.19  | 177.50 | 269.31 | 297.12 | 2.36 | 4.30E-07 | 0.44  | 4.62E-01 | 0.27  | 8.28E-01 | EGA2-1 |
| ENSMMUG00000022951  |             |                                                                          | 155.43 | 650.95 | 509.09 | 421.98 | 2.05 | 4.34E-08 | -0.33 | 4.96E-01 | -0.22 | 8.22E-01 | EGA2-1 |
| ENSMMUG00000040072  | LOC694780   | Zinc Finger Protein 676-like                                             | 36.85  | 82.66  | 94.60  | 67.99  | 1.11 | 9.41E-03 | 0.26  | 6.28E-01 | -0.63 | 3.63E-01 | EGA2-1 |
| ENSMMUG00000020263  | TMEM208     | Transmembrane Protein 208                                                | 0.41   | 6.68   | 11.76  | 7.65   | 5.48 | 7.87E-06 | 0.98  | 5.12E-01 | -0.55 | 8.66E-01 | EGA2-1 |
| ENSMMUG00000009798  | LOC698976   | Transcriptional Repressor CTCF                                           | 1.08   | 43.83  | 36.82  | 34.74  | 6.11 | 1.36E-12 | -0.36 | 7.83E-01 | 0.27  | 9.28E-01 | EGA2-1 |
| ENSMMUG00000012038  | NUTF2       | Nuclear Transport Factor 2                                               | 15.31  | 48.94  | 52.23  | 67.60  | 1.31 | 2.79E-02 | 0.11  | 9.02E-01 | 0.83  | 3.94E-01 | EGA2-1 |
| ENSMMUG00000021846  | ESRP2       | Epithelial Splicing Regulatory Protein 2                                 | 0.27   | 5.25   | 7.29   | 9.97   | 4.62 | 2.11E-10 | 0.53  | 5.91E-01 | -0.25 | 9.13E-01 | EGA2-1 |
| ENSMMUG00000010147  | PLA2G15     | Phospholipase A2 Group XV                                                | 0.03   | 0.84   | 0.41   | 0.79   | 6.00 | 2.34E-06 | -2.55 | 6.42E-02 | 2.10  | 3.29E-01 | EGA2-1 |
| ENSMMUG00000037975  | SLC7A6      | Solute Carrier Family 7 Member 6                                         | 0.90   | 3.59   | 2.46   | 1.10   | 1.90 | 1.99E-02 | -0.52 | 6.05E-01 | -0.47 | 8.06E-01 | EGA2-1 |
| ENSMMUG00000022177  | TANGO6      | Transport And Golgi Organization 6 Homolog                               | 0.38   | 2.84   | 1.43   | 1.74   | 2.73 | 6.19E-03 | -0.50 | 7.05E-01 | 0.36  | 9.00E-01 | EGA2-1 |
| ENSMMUG00000016635  |             |                                                                          | 1.26   | 43.65  | 23.95  | 7.51   | 5.75 | 1.42E-15 | -1.54 | 6.13E-02 | -0.71 | 6.66E-01 | EGA2-1 |
| ENSMMUG00000048384  | EXOSC6      | Exosome Component 6                                                      | 0.36   | 6.81   | 1.65   | 2.23   | 4.09 | 3.00E-02 | -2.52 | 2.18E-01 | 1.16  | 8.03E-01 | EGA2-1 |
| ENSMMUG00000039514  |             |                                                                          | 69.68  | 181.15 | 169.28 | 174.49 | 1.36 | 1.09E-02 | -0.15 | 8.45E-01 | -0.25 | 8.58E-01 | EGA2-1 |
| ENSMMUG00000012007  | PHLPP2      | PH Domain And Leucine Rich Repeat Protein Phosphatase 2                  | 0.44   | 3.08   | 3.62   | 6.82   | 2.49 | 1.65E-02 | 0.55  | 6.79E-01 | 0.77  | 7.32E-01 | EGA2-1 |
| ENSMMUG00000023312  | DHODH       | Dihydroorotate Dehydrogenase (quinone)                                   | 1.00   | 6.40   | 6.05   | 2.60   | 2.50 | 2.41E-02 | 0.10  | 9.55E-01 | -0.20 | 9.59E-01 | EGA2-1 |
| ENSMMUG00000043907  |             |                                                                          | 0.01   | 0.39   | 1.77   | 0.27   | 5.56 | 3.26E-04 | 1.49  | 3.99E-01 | -2.35 | 3.37E-01 | EGA2-1 |
| ENSMMUG00000017610  | FBXO31      | F-box Protein 31                                                         | 0.32   | 3.16   | 3.31   | 1.76   | 3.63 | 8.26E-04 | 0.02  | 9.92E-01 | -0.97 | 6.79E-01 | EGA2-1 |
| ENSMMUG00000002503  | CDK10       | Cyclin Dependent Kinase 10                                               | 0.08   | 0.52   | 0.72   | 0.89   | 2.23 | 2.89E-02 | 0.57  | 6.53E-01 | 0.98  | 6.10E-01 | EGA2-1 |
| ENSMMUG00000002505  | VPS9D1      | VPS9 Domain Containing 1                                                 | 0.11   | 1.07   | 0.18   | 0.51   | 3.87 | 4.78E-02 | -3.02 | 1.39E-01 | 2.78  | 4.10E-01 | EGA2-1 |
| ENSMMUG00000029059  | TUBB3       | Tubulin Beta 3 Class III                                                 | 0.10   | 7.91   | 15.67  | 8.58   | 6.06 | 1.85E-13 | 1.08  | 2.86E-01 | -1.03 | 5.31E-01 | EGA2-1 |
| ENSMMUG00000000212  |             |                                                                          | 0.20   | 3.51   | 2.93   | 3.88   | 4.46 | 8.17E-04 | -0.31 | 8.76E-01 | 0.22  | 9.64E-01 | EGA2-1 |
| ENSMMUG00000005086  | TGIF1       | TGFB Induced Factor Homeobox 1                                           | 0.54   | 4.80   | 8.62   | 9.01   | 2.29 | 1.96E-03 | 1.26  | 1.13E-01 | -0.69 | 6.51E-01 | EGA2-1 |
| ENSMMUG00000005461  | SMCHD1      | Structural Maintenance Of Chromosomes Flexible Hinge Domain Containing 1 | 1.15   | 8.95   | 14.22  | 13.51  | 2.59 | 2.89E-05 | 1.18  | 8.54E-02 | 0.11  | 9.64E-01 | EGA2-1 |
| ENSMMUG00000004656  | ROCK1       | Rho Associated Coiled-coil Containing Protein Kinase 1                   | 3.74   | 10.29  | 17.26  | 14.84  | 1.25 | 5.22E-03 | 0.79  | 9.47E-02 | -0.42 | 6.47E-01 | EGA2-1 |
| ENSMMUG00000012849  | RNF138      | Ring Finger Protein 138                                                  | 0.72   | 9.86   | 13.59  | 7.40   | 3.56 | 2.68E-10 | 0.70  | 3.18E-01 | -0.97 | 3.25E-01 | EGA2-1 |
| ENSMMUG00000018782  | C18H18orf21 | Chromosome 18 Open Reading Frame, Human C18orf21                         | 12.90  | 55.78  | 26.95  | 13.09  | 1.81 | 4.00E-02 | -0.45 | 6.88E-01 | -0.79 | 6.49E-01 | EGA2-1 |
| ENSMMUG000000039405 |             |                                                                          | 25.13  | 137.27 | 219.88 | 218.85 | 2.75 | 3.85E-05 | 0.64  | 4.48E-01 | 0.96  | 4.26E-01 | EGA2-1 |
| ENSMMUG000000032537 |             |                                                                          | 0.46   | 1.45   | 1.70   | 1.89   | 2.35 | 4.20E-02 | -0.33 | 8.36E-01 | 0.39  | 9.02E-01 | EGA2-1 |
| ENSMMUG00000038584  | CAPNS1      | Calpain Small Subunit 1                                                  | 20.61  | 61.55  | 134.42 | 220.71 | 1.36 | 3.17E-02 | 1.20  | 5.81E-02 | 0.68  | 5.53E-01 | EGA2-1 |
| ENSMMUG00000009051  | CXXC1       | CXXC Finger Protein 1                                                    | 1.49   | 6.19   | 4.79   | 3.56   | 2.19 | 1.82E-03 | -0.59 | 4.92E-01 | 0.30  | 8.78E-01 | EGA2-1 |

|                    |              |                                                      |       |        |        |        |      |          |       |          |       |          |        |
|--------------------|--------------|------------------------------------------------------|-------|--------|--------|--------|------|----------|-------|----------|-------|----------|--------|
| ENSMMUG00000017288 |              |                                                      | 0.20  | 3.68   | 4.33   | 3.26   | 3.96 | 8.54E-05 | 0.08  | 9.62E-01 | 0.84  | 7.06E-01 | EGA2-1 |
| ENSMMUG00000017289 |              |                                                      | 83.56 | 249.17 | 279.70 | 179.84 | 1.41 | 2.20E-03 | 0.19  | 7.70E-01 | -0.54 | 5.28E-01 | EGA2-1 |
| ENSMMUG00000023652 | MEX3C        | Mex-3 RNA Binding Family Member C                    | 4.26  | 14.84  | 18.30  | 14.22  | 1.34 | 3.62E-03 | 0.78  | 1.14E-01 | -0.35 | 7.37E-01 | EGA2-1 |
| ENSMMUG00000032513 | LOC698225    | Cytochrome C-like                                    | 9.99  | 46.01  | 61.48  | 33.25  | 2.42 | 4.44E-05 | 0.35  | 6.63E-01 | -0.44 | 7.54E-01 | EGA2-1 |
| ENSMMUG00000042864 | DSEL         | Dermatan Sulfate Epimerase-like                      | 0.20  | 1.03   | 2.45   | 0.92   | 2.34 | 2.10E-02 | -0.02 | 9.89E-01 | -1.73 | 2.48E-01 | EGA2-1 |
| ENSMMUG00000032503 |              |                                                      | 0.56  | 16.76  | 11.15  | 6.03   | 4.14 | 2.90E-03 | 1.23  | 4.51E-01 | -1.33 | 6.30E-01 | EGA2-1 |
| ENSMMUG00000032487 |              |                                                      | 33.98 | 89.04  | 120.93 | 137.16 | 1.28 | 2.89E-03 | 0.62  | 1.92E-01 | -0.19 | 8.72E-01 | EGA2-1 |
| ENSMMUG00000013710 | ADNP2        | ADNP Homeobox 2                                      | 1.10  | 10.21  | 12.37  | 4.79   | 3.72 | 1.31E-06 | -0.12 | 9.26E-01 | -0.36 | 8.71E-01 | EGA2-1 |
| ENSMMUG00000018740 | BSG          | Basigin (Ok Blood Group)                             | 29.53 | 107.49 | 118.17 | 67.53  | 1.94 | 6.43E-03 | -0.10 | 9.30E-01 | -0.65 | 6.52E-01 | EGA2-1 |
| ENSMMUG00000016450 | PTBP1        | Polypyrimidine Tract Binding Protein 1               | 50.02 | 99.89  | 80.17  | 77.35  | 0.85 | 3.81E-02 | -0.21 | 6.83E-01 | 0.10  | 9.36E-01 | EGA2-1 |
| ENSMMUG00000030350 | RPS15        | Ribosomal Protein S15                                | 3.45  | 13.80  | 16.91  | 16.38  | 2.16 | 2.08E-07 | 0.24  | 6.91E-01 | -0.10 | 9.49E-01 | EGA2-1 |
| ENSMMUG00000030360 |              |                                                      | 0.59  | 4.66   | 4.25   | 5.18   | 2.68 | 5.93E-03 | -0.35 | 7.99E-01 | 0.84  | 6.81E-01 | EGA2-1 |
| ENSMMUG0000003815  | ADAMTSL5     | ADAMTS Like 5                                        | 0.02  | 2.32   | 2.38   | 1.03   | 6.27 | 3.67E-04 | -1.78 | 3.80E-01 | 1.31  | 7.39E-01 | EGA2-1 |
| ENSMMUG00000010984 | MOB3A        | MOB Kinase Activator 3A                              | 1.14  | 11.03  | 2.41   | 2.42   | 3.13 | 2.16E-02 | -2.39 | 8.82E-02 | -0.72 | 8.28E-01 | EGA2-1 |
| ENSMMUG00000017949 | OAZ1         | Ornithine Decarboxylase Antizyme 1                   | 35.13 | 156.65 | 140.99 | 107.56 | 2.40 | 1.01E-04 | -0.82 | 2.58E-01 | 0.25  | 8.93E-01 | EGA2-1 |
| ENSMMUG00000038861 | TIMM13       | Translocase Of Inner Mitochondrial Membrane 13       | 0.62  | 8.59   | 10.81  | 9.34   | 4.26 | 1.30E-04 | 1.46  | 2.54E-01 | 0.12  | 9.77E-01 | EGA2-1 |
| ENSMMUG00000047088 | ZNF57        | Zinc Finger Protein 57                               | 3.57  | 7.33   | 9.47   | 7.71   | 2.67 | 6.14E-05 | -0.03 | 9.78E-01 | 0.52  | 7.37E-01 | EGA2-1 |
| ENSMMUG00000010100 | LOC718892    | Coiled-coil Domain-containing Protein 94             | 0.37  | 1.40   | 0.55   | 0.90   | 2.44 | 1.85E-02 | -1.71 | 1.14E-01 | -0.07 | 9.86E-01 | EGA2-1 |
| ENSMMUG00000044446 | FEM1A        | Fem-1 Homolog A                                      | 0.17  | 3.27   | 2.45   | 3.54   | 5.44 | 1.53E-05 | -2.14 | 1.13E-01 | 0.16  | 9.73E-01 | EGA2-1 |
| ENSMMUG00000017968 | SAFB2        | Scaffold Attachment Factor B2                        | 17.56 | 36.92  | 20.76  | 17.76  | 1.24 | 1.73E-02 | -0.81 | 1.37E-01 | 0.04  | 9.86E-01 | EGA2-1 |
| ENSMMUG00000017970 | SAFB         | Scaffold Attachment Factor B                         | 11.86 | 48.84  | 35.79  | 27.77  | 1.76 | 1.52E-04 | -0.46 | 4.17E-01 | 0.10  | 9.54E-01 | EGA2-1 |
| ENSMMUG00000041188 | RPL36        | Ribosomal Protein L36                                | 39.45 | 171.15 | 270.31 | 203.48 | 1.98 | 3.28E-06 | 0.87  | 6.31E-02 | -0.63 | 4.13E-01 | EGA2-1 |
| ENSMMUG00000031027 |              |                                                      | 0.70  | 4.46   | 4.46   | 3.63   | 2.93 | 6.21E-03 | 0.22  | 8.87E-01 | -1.48 | 4.20E-01 | EGA2-1 |
| ENSMMUG00000016665 | NDUFA11      | NADH:ubiquinone Oxidoreductase Subunit A11           | 0.77  | 5.04   | 4.25   | 6.61   | 2.77 | 2.50E-03 | -0.41 | 7.41E-01 | 0.74  | 7.13E-01 | EGA2-1 |
| ENSMMUG00000000054 | ALKBH7       | AlkB Homolog 7                                       | 0.16  | 1.65   | 2.26   | 1.51   | 4.81 | 2.04E-05 | -0.34 | 8.34E-01 | 0.02  | 9.97E-01 | EGA2-1 |
| ENSMMUG00000008697 | TRIP10       | Thyroid Hormone Receptor Interactor 10               | 6.58  | 32.87  | 13.66  | 8.18   | 1.90 | 1.03E-02 | -0.88 | 2.92E-01 | -0.74 | 6.06E-01 | EGA2-1 |
| ENSMMUG00000028907 | INSR         | Insulin Receptor                                     | 0.59  | 3.03   | 1.95   | 2.17   | 2.18 | 2.44E-02 | 0.24  | 8.62E-01 | -0.67 | 7.58E-01 | EGA2-1 |
| ENSMMUG00000046483 | LOC100427254 | 40S Ribosomal Protein S27-like                       | 34.51 | 169.59 | 248.77 | 275.29 | 2.25 | 2.94E-06 | 0.45  | 4.63E-01 | 0.18  | 9.02E-01 | EGA2-1 |
| ENSMMUG00000028895 | RPS28        | Ribosomal Protein S28                                | 15.02 | 114.85 | 114.21 | 71.36  | 2.78 | 1.84E-08 | 0.15  | 8.45E-01 | -0.27 | 8.46E-01 | EGA2-1 |
| ENSMMUG00000018806 | HNRNPM       | Heterogeneous Nuclear Ribonucleoprotein M            | 6.16  | 55.78  | 52.63  | 37.70  | 3.07 | 1.35E-16 | 0.09  | 8.88E-01 | -0.11 | 9.35E-01 | EGA2-1 |
| ENSMMUG00000020841 | ZNF317       | Zinc Finger Protein 317                              | 0.16  | 3.79   | 2.55   | 3.40   | 4.25 | 1.66E-04 | -0.15 | 9.34E-01 | -0.23 | 9.56E-01 | EGA2-1 |
| ENSMMUG00000018887 | ZNF699       | Zinc Finger Protein 699                              | 0.09  | 1.57   | 1.68   | 1.54   | 2.90 | 1.87E-02 | 0.29  | 8.67E-01 | 0.08  | 9.86E-01 | EGA2-1 |
| ENSMMUG00000018883 | ZNF177       | Zinc Finger Protein 177                              | 2.48  | 9.73   | 6.35   | 6.97   | 2.21 | 2.41E-02 | -0.74 | 5.25E-01 | 0.58  | 8.03E-01 | EGA2-1 |
| ENSMMUG00000005694 | ZNF426       | Zinc Finger Protein 426                              | 0.93  | 3.23   | 5.41   | 4.97   | 1.67 | 4.45E-02 | 0.45  | 6.68E-01 | 0.06  | 9.85E-01 | EGA2-1 |
| ENSMMUG00000005695 | ZNF121       | Zinc Finger Protein 121                              | 0.57  | 38.14  | 35.37  | 29.82  | 5.80 | 5.29E-22 | -0.25 | 7.89E-01 | 0.04  | 9.86E-01 | EGA2-1 |
| ENSMMUG00000007875 | FBXL12       | F-box And Leucine Rich Repeat Protein 12             | 0.28  | 3.33   | 3.35   | 2.00   | 3.22 | 1.16E-02 | -1.07 | 4.78E-01 | 2.02  | 3.17E-01 | EGA2-1 |
| ENSMMUG00000007877 |              |                                                      | 59.72 | 302.13 | 122.45 | 75.42  | 2.05 | 9.78E-03 | -1.01 | 2.50E-01 | -0.57 | 7.51E-01 | EGA2-1 |
| ENSMMUG00000017211 |              |                                                      | 1.85  | 8.68   | 8.21   | 3.32   | 2.56 | 2.65E-02 | -0.25 | 8.80E-01 | -0.95 | 6.87E-01 | EGA2-1 |
| ENSMMUG00000017217 | EIF3G        | Eukaryotic Translation Initiation Factor 3 Subunit G | 2.37  | 23.10  | 19.11  | 12.26  | 3.56 | 2.33E-05 | -0.68 | 5.31E-01 | 0.04  | 9.92E-01 | EGA2-1 |
| ENSMMUG00000014673 | ILF3         | Interleukin Enhancer Binding Factor 3                | 24.50 | 56.09  | 39.71  | 28.25  | 1.29 | 2.14E-02 | -0.55 | 3.87E-01 | -0.11 | 9.58E-01 | EGA2-1 |
| ENSMMUG00000014677 | DNM2         | Dynamain 2                                           | 3.31  | 8.56   | 12.64  | 12.03  | 1.53 | 3.82E-02 | 0.28  | 7.78E-01 | 0.25  | 9.02E-01 | EGA2-1 |
| ENSMMUG00000047218 | LOC716974    | Zinc Finger Protein 440                              | 0.33  | 3.42   | 1.73   | 4.19   | 3.69 | 1.32E-08 | -1.19 | 1.12E-01 | 1.61  | 9.62E-02 | EGA2-1 |
| ENSMMUG00000012587 | LOC717123    | Zinc Finger Protein 700                              | 1.48  | 6.14   | 5.55   | 6.86   | 1.76 | 2.54E-02 | 0.06  | 9.60E-01 | -0.26 | 9.04E-01 | EGA2-1 |
| ENSMMUG00000005859 |              |                                                      | 0.09  | 1.53   | 0.55   | 0.84   | 3.85 | 6.37E-03 | -1.59 | 3.21E-01 | 1.38  | 6.24E-01 | EGA2-1 |
| ENSMMUG00000013571 |              |                                                      | 0.31  | 22.34  | 11.13  | 12.87  | 6.80 | 6.76E-11 | -1.36 | 2.88E-01 | 0.92  | 7.06E-01 | EGA2-1 |
| ENSMMUG00000016862 | ZNF791       | Zinc Finger Protein 791                              | 0.14  | 2.43   | 2.17   | 2.04   | 3.69 | 8.43E-04 | 0.79  | 5.68E-01 | 0.07  | 9.86E-01 | EGA2-1 |

|                     |              |                                                                    |        |        |        |        |      |          |       |          |       |          |        |
|---------------------|--------------|--------------------------------------------------------------------|--------|--------|--------|--------|------|----------|-------|----------|-------|----------|--------|
| ENSMMUG00000016869  | DHPS         | Deoxyhypusine Synthase                                             | 0.67   | 3.36   | 1.04   | 1.97   | 2.31 | 6.16E-03 | -1.47 | 9.92E-02 | 0.56  | 7.79E-01 | EGA2-1 |
| ENSMMUG00000006275  | ASNA1        | ArsA Arsenite Transporter, ATP-binding, Homolog 1 (bacterial)      | 1.33   | 32.12  | 56.87  | 36.55  | 4.62 | 2.50E-08 | 0.53  | 6.46E-01 | 0.05  | 9.87E-01 | EGA2-1 |
| ENSMMUG00000005690  | RNASEH2A     | Ribonuclease H2 Subunit A                                          | 1.90   | 5.15   | 5.25   | 5.94   | 1.96 | 2.26E-02 | -0.50 | 6.45E-01 | 0.03  | 9.92E-01 | EGA2-1 |
| ENSMMUG00000048033  | C19H19orf53  | Chromosome 19 Open Reading Frame, Human C19orf53                   | 0.79   | 5.10   | 4.55   | 2.04   | 3.35 | 1.93E-04 | -0.76 | 5.01E-01 | -0.94 | 6.12E-01 | EGA2-1 |
| ENSMMUG00000005723  | DDX39A       | DExD-box Helicase 39A                                              | 3.85   | 20.22  | 17.34  | 12.10  | 2.66 | 3.19E-07 | -0.64 | 3.21E-01 | -0.26 | 8.57E-01 | EGA2-1 |
| ENSMMUG00000017984  | AKAP8        | A-kinase Anchoring Protein 8                                       | 10.60  | 25.96  | 30.17  | 15.05  | 1.30 | 2.03E-02 | 0.34  | 6.24E-01 | -0.99 | 2.27E-01 | EGA2-1 |
| ENSMMUG00000042837  | MED26        | Mediator Complex Subunit 26                                        | 1.96   | 14.85  | 13.79  | 4.25   | 2.52 | 2.91E-03 | -1.68 | 5.81E-02 | 0.40  | 8.57E-01 | EGA2-1 |
| ENSMMUG00000023403  | GTPBP3       | GTP Binding Protein 3, Mitochondrial                               | 0.03   | 7.69   | 3.44   | 0.73   | 7.37 | 1.62E-06 | -1.44 | 4.43E-01 | -1.16 | 7.50E-01 | EGA2-1 |
| ENSMMUG00000005830  | MVB12A       | Multivesicular Body Subunit 12A                                    | 0.35   | 6.14   | 16.31  | 6.24   | 4.31 | 2.03E-05 | 2.00  | 7.08E-02 | -2.07 | 1.85E-01 | EGA2-1 |
| ENSMMUG00000028844  | RPL18A       | Ribosomal Protein L18a                                             | 3.61   | 31.82  | 32.82  | 28.06  | 3.47 | 2.11E-07 | -0.33 | 7.36E-01 | -0.47 | 7.78E-01 | EGA2-1 |
| ENSMMUG00000047873  | IFI30        | IFI30, Lysosomal Thiol Reductase                                   | 0.04   | 1.06   | 0.44   | 0.31   | 4.75 | 2.61E-06 | -0.79 | 5.40E-01 | -0.23 | 9.50E-01 | EGA2-1 |
| ENSMMUG00000004405  | LSM4         | LSM4 Homolog, U6 Small Nuclear RNA And MRNA Degradation Associated | 0.36   | 2.34   | 4.97   | 7.41   | 2.78 | 1.96E-03 | 1.12  | 2.70E-01 | 0.58  | 7.89E-01 | EGA2-1 |
| ENSMMUG00000016085  | KXD1         | KxDL Motif Containing 1                                            | 6.68   | 26.62  | 43.14  | 42.47  | 1.73 | 5.99E-05 | 0.66  | 1.85E-01 | 0.32  | 7.62E-01 | EGA2-1 |
| ENSMMUG00000023290  | GDF1         | Growth Differentiation Factor 1                                    | 0.07   | 0.48   | 1.48   | 0.38   | 5.96 | 1.54E-02 | -1.10 | 7.24E-01 | 1.21  | 8.35E-01 | EGA2-1 |
| ENSMMUG00000023293  | DDX49        | DEAD-box Helicase 49                                               | 2.56   | 10.21  | 5.31   | 2.99   | 1.94 | 3.32E-02 | -1.02 | 3.09E-01 | -0.77 | 6.74E-01 | EGA2-1 |
| ENSMMUG00000028834  | SUGP1        | SURP And G-patch Domain Containing 1                               | 1.19   | 7.43   | 2.26   | 2.98   | 2.35 | 1.47E-03 | -1.13 | 1.67E-01 | 0.99  | 4.51E-01 | EGA2-1 |
| ENSMMUG00000011351  | YJEFN3       | YjefN-terminal Domain Containing 3                                 | 0.51   | 4.39   | 7.26   | 6.34   | 3.72 | 2.59E-03 | 0.13  | 9.46E-01 | -0.11 | 9.82E-01 | EGA2-1 |
| ENSMMUG00000000654  | LPAR2        | Lysophosphatidic Acid Receptor 2                                   | 0.05   | 1.14   | 8.29   | 2.45   | 3.77 | 2.49E-02 | 2.95  | 7.91E-02 | -1.96 | 4.94E-01 | EGA2-1 |
| ENSMMUG00000040352  | LOC100429350 | Zinc Finger Protein 506-like                                       | 6.41   | 83.05  | 35.55  | 34.35  | 3.16 | 3.39E-07 | -1.21 | 8.23E-02 | 0.37  | 8.20E-01 | EGA2-1 |
| ENSMMUG00000046766  | LOC720437    | Zinc Finger Protein 85                                             | 5.15   | 29.41  | 30.48  | 23.49  | 2.48 | 2.90E-08 | 0.32  | 6.05E-01 | -0.53 | 5.55E-01 | EGA2-1 |
| ENSMMUG00000039728  | ZNF430       | Zinc Finger Protein 430                                            | 3.67   | 9.62   | 7.80   | 11.06  | 1.08 | 1.95E-02 | 0.36  | 5.12E-01 | 0.11  | 9.42E-01 | EGA2-1 |
| ENSMMUG00000031426  | LOC719947    | 40S Ribosomal Protein S25 Pseudogene                               | 242.40 | 646.22 | 792.02 | 544.73 | 1.27 | 1.95E-03 | 0.33  | 5.24E-01 | -0.47 | 5.43E-01 | EGA2-1 |
| ENSMMUG00000028809  | LOC693665    | Zinc Finger Protein 429                                            | 3.59   | 22.81  | 18.61  | 13.63  | 2.14 | 2.24E-04 | 0.07  | 9.43E-01 | -0.03 | 9.88E-01 | EGA2-1 |
| ENSMMUG00000003686  | LOC693860    | Zinc Finger Protein 100-like                                       | 9.60   | 32.54  | 46.65  | 30.38  | 1.82 | 2.33E-04 | 0.65  | 2.60E-01 | -0.32 | 7.91E-01 | EGA2-1 |
| ENSMMUG00000040273  | LOC694388    | Zinc Finger Protein 257                                            | 8.00   | 51.33  | 49.29  | 25.52  | 2.65 | 2.40E-09 | -0.19 | 7.79E-01 | -0.82 | 2.68E-01 | EGA2-1 |
| ENSMMUG00000038095  | LOC694258    | Putative Zinc Finger Protein 724                                   | 1.40   | 4.80   | 3.43   | 2.89   | 1.96 | 3.29E-03 | -0.84 | 2.68E-01 | 0.36  | 8.33E-01 | EGA2-1 |
| ENSMMUG00000038943  | LOC695478    | Zinc Finger Protein 729-like                                       | 2.31   | 12.00  | 29.98  | 20.05  | 2.58 | 1.63E-04 | 1.25  | 9.76E-02 | -0.55 | 7.28E-01 | EGA2-1 |
| ENSMMUG00000044776  | LOC695938    | Zinc Finger Protein 492                                            | 6.29   | 18.16  | 19.00  | 16.07  | 1.33 | 2.00E-02 | 0.63  | 3.30E-01 | -0.55 | 6.17E-01 | EGA2-1 |
| ENSMMUG00000043871  | LOC696068    | 40S Ribosomal Protein S27-like                                     | 6.91   | 33.90  | 61.55  | 48.82  | 2.39 | 6.25E-06 | 0.86  | 1.54E-01 | -0.01 | 9.97E-01 | EGA2-1 |
| ENSMMUG00000003688  | ZNF91        | Zinc Finger Protein 91                                             | 4.43   | 11.77  | 9.93   | 8.24   | 1.40 | 7.60E-04 | -0.06 | 9.29E-01 | -0.11 | 9.40E-01 | EGA2-1 |
| ENSMMUG00000037794  | LOC698907    | Putative Zinc Finger Protein 724                                   | 11.47  | 53.39  | 65.50  | 27.87  | 2.01 | 1.80E-03 | 0.31  | 7.22E-01 | -0.59 | 6.66E-01 | EGA2-1 |
| ENSMMUG000000021614 | LSM14A       | LSM14A, MRNA Processing Body Assembly Factor                       | 13.70  | 35.93  | 23.64  | 22.55  | 1.30 | 1.39E-03 | -0.62 | 1.73E-01 | 0.01  | 9.96E-01 | EGA2-1 |
| ENSMMUG00000039188  | ZNF30        | Zinc Finger Protein 30                                             | 0.20   | 2.30   | 2.28   | 0.71   | 5.50 | 2.92E-07 | -1.78 | 1.45E-01 | 1.07  | 6.42E-01 | EGA2-1 |
| ENSMMUG00000004843  | SCN1B        | Sodium Voltage-gated Channel Beta Subunit 1                        | 0.03   | 1.03   | 0.34   | 0.87   | 4.79 | 2.63E-03 | -0.99 | 6.02E-01 | 3.92  | 5.01E-02 | EGA2-1 |

|                    |           |                                                               |       |        |        |        |       |          |       |          |       |          |        |
|--------------------|-----------|---------------------------------------------------------------|-------|--------|--------|--------|-------|----------|-------|----------|-------|----------|--------|
| ENSMMUG0000000837  | GAPDHS    | Glyceraldehyde-3-phosphate Dehydrogenase, Spermatogenic       | 0.05  | 1.66   | 3.98   | 2.89   | 4.45  | 2.23E-04 | 1.44  | 2.54E-01 | 1.10  | 6.34E-01 | EGA2-1 |
| ENSMMUG00000016765 | COX6B1    | Cytochrome C Oxidase Subunit 6B                               | 3.86  | 23.89  | 31.39  | 67.57  | 2.43  | 3.13E-02 | 0.43  | 7.78E-01 | 0.92  | 6.88E-01 | EGA2-1 |
| ENSMMUG00000002384 | IGFLR1    | IGF Like Family Receptor 1                                    | 0.05  | 0.81   | 1.63   | 1.66   | 3.41  | 1.80E-02 | 1.78  | 2.48E-01 | 0.13  | 9.80E-01 | EGA2-1 |
| ENSMMUG00000017051 | KIRREL2   | Kirre Like Nephtrin Family Adhesion Molecule 2                | 0.06  | 1.48   | 0.69   | 2.15   | 4.40  | 1.46E-02 | -0.69 | 7.76E-01 | 1.20  | 7.68E-01 | EGA2-1 |
| ENSMMUG00000048113 | ZNF260    | Zinc Finger Protein 260                                       | 1.68  | 13.66  | 11.72  | 7.82   | 2.79  | 1.36E-03 | 0.30  | 8.12E-01 | -1.32 | 3.62E-01 | EGA2-1 |
| ENSMMUG00000042552 |           |                                                               | 0.08  | 10.80  | 3.22   | 2.05   | 7.84  | 1.64E-04 | -2.31 | 3.13E-01 | 1.07  | 8.37E-01 | EGA2-1 |
| ENSMMUG00000028777 | LOC713991 | Ribosomal Protein, Large, P1-like                             | 27.41 | 60.05  | 153.29 | 111.98 | 1.35  | 3.11E-02 | 0.87  | 1.89E-01 | -0.50 | 7.00E-01 | EGA2-1 |
| ENSMMUG00000038877 |           |                                                               | 1.45  | 5.88   | 10.35  | 8.13   | 1.86  | 1.32E-02 | 1.32  | 8.76E-02 | -0.56 | 7.34E-01 | EGA2-1 |
| ENSMMUG00000038221 | PSMD8     | Proteasome 26S Subunit, Non-ATPase 8                          | 2.13  | 9.60   | 8.28   | 6.99   | 2.00  | 1.79E-03 | -0.29 | 7.48E-01 | -0.04 | 9.86E-01 | EGA2-1 |
| ENSMMUG00000028767 | EIF3K     | Eukaryotic Translation Initiation Factor 3 Subunit K          | 2.58  | 12.29  | 15.78  | 14.54  | 2.10  | 5.33E-06 | 0.63  | 2.47E-01 | -0.09 | 9.62E-01 | EGA2-1 |
| ENSMMUG00000004877 | HNRNPL    | Heterogeneous Nuclear Ribonucleoprotein L                     | 6.73  | 66.87  | 58.18  | 71.46  | 2.97  | 1.06E-06 | 0.37  | 6.67E-01 | 0.33  | 8.43E-01 | EGA2-1 |
| ENSMMUG00000023643 | NFKBIB    | NFKB Inhibitor Beta                                           | 1.09  | 27.99  | 13.69  | 7.38   | 5.22  | 2.33E-08 | -1.64 | 1.28E-01 | 0.73  | 7.50E-01 | EGA2-1 |
| ENSMMUG00000019369 | PLEKHG2   | Pleckstrin Homology And RhoGEF Domain Containing G2           | 0.83  | 6.28   | 2.23   | 1.07   | 2.86  | 1.99E-02 | -1.62 | 2.26E-01 | -0.83 | 7.64E-01 | EGA2-1 |
| ENSMMUG00000009527 | LOC699418 | Galectin-10-like                                              | 0.00  | 1.15   | 0.49   | 3.47   | 23.18 | 1.18E-22 | 2.52  | 3.94E-01 | -1.40 | 8.18E-01 | EGA2-1 |
| ENSMMUG00000022726 | DYRK1B    | Dual Specificity Tyrosine Phosphorylation Regulated Kinase 1B | 0.11  | 2.18   | 0.51   | 0.59   | 5.49  | 2.33E-06 | -2.34 | 6.40E-02 | 0.29  | 9.46E-01 | EGA2-1 |
| ENSMMUG00000022725 | FBL       | Fibrillarlin                                                  | 12.67 | 123.74 | 69.83  | 61.20  | 3.06  | 1.66E-11 | -0.62 | 2.75E-01 | -0.20 | 8.87E-01 | EGA2-1 |
| ENSMMUG00000022724 | FCGBP     | Fc Fragment Of IgG Binding Protein                            | 0.04  | 3.36   | 1.48   | 1.09   | 5.79  | 1.19E-09 | -0.31 | 8.31E-01 | 0.53  | 8.40E-01 | EGA2-1 |
| ENSMMUG00000017188 | PSMC4     | Proteasome 26S Subunit, ATPase 4                              | 11.38 | 41.78  | 27.98  | 22.76  | 1.35  | 3.64E-02 | -0.18 | 8.39E-01 | -0.19 | 9.17E-01 | EGA2-1 |
| ENSMMUG00000006071 | PLD3      | Phospholipase D Family Member 3                               | 0.52  | 3.22   | 0.73   | 1.50   | 3.13  | 1.60E-02 | -2.44 | 6.57E-02 | 0.71  | 8.19E-01 | EGA2-1 |
| ENSMMUG00000022625 | PRX       | Periaxin                                                      | 0.02  | 1.02   | 0.91   | 0.28   | 7.76  | 2.49E-05 | 1.09  | 6.23E-01 | -1.37 | 7.26E-01 | EGA2-1 |
| ENSMMUG00000016027 | SERTAD1   | SERTA Domain Containing 1                                     | 1.88  | 11.83  | 5.81   | 2.08   | 3.21  | 2.22E-02 | -2.09 | 1.59E-01 | -0.32 | 9.46E-01 | EGA2-1 |
| ENSMMUG00000022024 | SNRPA     | Small Nuclear Ribonucleoprotein Polypeptide A                 | 4.96  | 16.82  | 25.88  | 17.67  | 1.64  | 2.49E-03 | 0.88  | 1.36E-01 | -0.96 | 2.53E-01 | EGA2-1 |
| ENSMMUG00000006394 | CYP2A24   | Cytochrome P450, Family 2, Subfamily A, Polypeptide 24        | 0.34  | 4.36   | 1.81   | 1.55   | 3.56  | 4.35E-04 | -1.69 | 1.35E-01 | 1.50  | 4.17E-01 | EGA2-1 |
| ENSMMUG00000023704 | B9D2      | B9 Domain Containing 2                                        | 0.17  | 2.52   | 0.83   | 0.50   | 4.96  | 4.95E-03 | -2.57 | 1.76E-01 | 1.38  | 7.25E-01 | EGA2-1 |
| ENSMMUG00000014345 | EXOSC5    | Exosome Component 5                                           | 0.51  | 25.09  | 13.45  | 5.61   | 5.38  | 1.26E-04 | -1.10 | 5.37E-01 | 1.28  | 6.70E-01 | EGA2-1 |
| ENSMMUG00000044566 |           |                                                               | 11.99 | 57.34  | 49.70  | 25.06  | 1.66  | 2.56E-02 | -0.03 | 9.80E-01 | -0.57 | 7.16E-01 | EGA2-1 |
| ENSMMUG00000004468 | IRGQ      | Immunity Related GTPase Q                                     | 0.40  | 5.01   | 6.68   | 2.27   | 3.22  | 8.38E-03 | 0.96  | 5.14E-01 | -2.54 | 1.42E-01 | EGA2-1 |
| ENSMMUG00000021468 | ZNF221    | Zinc Finger Protein 221                                       | 0.28  | 1.83   | 1.88   | 0.29   | 3.36  | 3.75E-03 | -2.28 | 6.12E-02 | 0.80  | 7.72E-01 | EGA2-1 |
| ENSMMUG00000012808 | ZNF229    | Zinc Finger Protein 229                                       | 0.48  | 13.44  | 5.71   | 7.89   | 4.45  | 4.15E-07 | -1.24 | 2.39E-01 | 0.74  | 7.19E-01 | EGA2-1 |
| ENSMMUG00000014303 | TOMM40    | Translocase Of Outer Mitochondrial Membrane 40                | 3.85  | 28.21  | 44.26  | 32.06  | 2.61  | 1.77E-03 | 0.86  | 3.84E-01 | -0.36 | 8.78E-01 | EGA2-1 |
| ENSMMUG00000022932 | TRAPPC6A  | Trafficking Protein Particle Complex 6A                       | 0.03  | 1.03   | 0.79   | 2.19   | 4.82  | 3.11E-03 | 0.43  | 8.44E-01 | 0.77  | 8.45E-01 | EGA2-1 |
| ENSMMUG00000000717 | CD3EAP    | CD3e Molecule Associated Protein                              | 5.74  | 49.94  | 40.33  | 13.52  | 3.46  | 2.72E-09 | -0.55 | 4.67E-01 | -1.10 | 2.54E-01 | EGA2-1 |
| ENSMMUG00000006937 | SNRPD2    | Small Nuclear Ribonucleoprotein D2 Polypeptide                | 6.56  | 94.59  | 82.72  | 83.57  | 4.02  | 1.75E-05 | -0.14 | 9.28E-01 | -0.21 | 9.51E-01 | EGA2-1 |

|                      |              |                                                        |        |        |        |        |       |          |       |          |       |          |        |
|----------------------|--------------|--------------------------------------------------------|--------|--------|--------|--------|-------|----------|-------|----------|-------|----------|--------|
| ENSMMUG0000000217    | PPP5C        | Protein Phosphatase 5 Catalytic Subunit                | 0.63   | 6.65   | 7.98   | 10.32  | 3.73  | 1.01E-02 | -0.91 | 6.19E-01 | 1.87  | 4.54E-01 | EGA2-1 |
| ENSMMUG0000000218    | LOC717246    | 60S Ribosomal Protein L18a-like                        | 1.75   | 14.69  | 18.83  | 14.92  | 2.63  | 5.10E-05 | 0.45  | 6.01E-01 | -0.21 | 9.17E-01 | EGA2-1 |
| ENSMMUG00000009506   | SAE1         | SUMO1 Activating Enzyme Subunit 1                      | 12.35  | 45.44  | 22.63  | 29.05  | 1.73  | 2.64E-02 | -1.15 | 1.60E-01 | 0.83  | 5.60E-01 | EGA2-1 |
| ENSMMUG00000005123   | ZNF114       | Zinc Finger Protein 114                                | 0.15   | 5.96   | 4.37   | 5.67   | 6.19  | 1.39E-10 | 0.18  | 9.07E-01 | -0.27 | 9.36E-01 | EGA2-1 |
| ENSMMUG00000001791   | GRWD1        | Glutamate Rich WD Repeat Containing 1                  | 0.52   | 12.76  | 5.85   | 4.50   | 4.70  | 1.19E-06 | -1.07 | 3.74E-01 | 0.52  | 8.45E-01 | EGA2-1 |
| ENSMMUG000000022158  | LOC704394    | Ribosomal Protein L18-like                             | 50.63  | 152.89 | 222.65 | 195.70 | 1.85  | 1.57E-04 | 0.18  | 7.96E-01 | -0.08 | 9.65E-01 | EGA2-1 |
| ENSMMUG00000048854   | TULP2        | Tubby Like Protein 2                                   | 0.03   | 1.65   | 1.45   | 0.09   | 5.31  | 1.72E-05 | -1.37 | 3.46E-01 | -1.81 | 3.84E-01 | EGA2-1 |
| ENSMMUG00000003907   | BAX          | BCL2 Associated X, Apoptosis Regulator                 | 1.05   | 5.14   | 3.15   | 6.06   | 2.75  | 3.72E-02 | -1.61 | 2.58E-01 | 1.57  | 4.90E-01 | EGA2-1 |
| ENSMMUG00000004928   | SNRNP70      | Small Nuclear Ribonucleoprotein U1 Subunit 70          | 2.52   | 8.47   | 10.87  | 6.82   | 1.91  | 1.37E-02 | 0.58  | 5.37E-01 | -0.53 | 7.61E-01 | EGA2-1 |
| ENSMMUG00000007549   | RPS11        | Ribosomal Protein S11                                  | 165.68 | 692.16 | 765.36 | 538.30 | 2.12  | 8.50E-07 | 0.24  | 7.01E-01 | -0.97 | 1.39E-01 | EGA2-1 |
| ENSMMUG00000011612   | AP2A1        | Adaptor Related Protein Complex 2 Alpha 1 Subunit      | 2.70   | 9.20   | 5.92   | 20.96  | 2.43  | 3.73E-02 | -1.23 | 3.43E-01 | 1.61  | 3.95E-01 | EGA2-1 |
| ENSMMUG00000039233   |              |                                                        | 0.23   | 13.93  | 2.71   | 0.35   | 7.85  | 2.52E-03 | -3.80 | 1.63E-01 | -0.12 | 9.91E-01 | EGA2-1 |
| ENSMMUG00000002310   | ZNF577       | Zinc Finger Protein 577                                | 0.32   | 2.40   | 0.99   | 2.04   | 3.46  | 6.12E-03 | -0.91 | 5.59E-01 | 0.70  | 8.23E-01 | EGA2-1 |
| ENSMMUG000000049187  | ZNF614       | Zinc Finger Protein 614                                | 1.08   | 5.78   | 3.09   | 3.87   | 3.04  | 1.20E-03 | -0.85 | 4.56E-01 | 0.31  | 9.12E-01 | EGA2-1 |
| ENSMMUG000000041450  | ZNF432       | Zinc Finger Protein 432                                | 0.92   | 3.72   | 1.89   | 1.12   | 2.20  | 3.15E-02 | -0.96 | 4.11E-01 | -0.89 | 6.67E-01 | EGA2-1 |
| ENSMMUG000000021986  | PPP2R1A      | Protein Phosphatase 2 Scaffold Subunit Aalpha          | 10.19  | 26.14  | 18.14  | 19.38  | 1.86  | 4.16E-03 | -0.78 | 2.90E-01 | -0.31 | 8.54E-01 | EGA2-1 |
| ENSMMUG000000020234  | ZNF480       | Zinc Finger Protein 480                                | 0.22   | 2.60   | 6.98   | 3.92   | 3.01  | 1.58E-02 | 2.01  | 1.20E-01 | -0.68 | 8.21E-01 | EGA2-1 |
| ENSMMUG000000028720  |              |                                                        | 0.33   | 5.68   | 4.05   | 4.87   | 3.82  | 3.19E-04 | -0.27 | 8.63E-01 | 1.19  | 5.60E-01 | EGA2-1 |
| ENSMMUG000000023272  | LOC720244    | Zinc Finger Protein 83-like                            | 2.34   | 7.41   | 4.68   | 5.17   | 1.57  | 2.55E-02 | -0.92 | 2.28E-01 | 0.93  | 4.31E-01 | EGA2-1 |
| ENSMMUG000000004247  |              |                                                        | 0.02   | 3.15   | 2.39   | 1.05   | 8.13  | 2.03E-05 | -2.09 | 3.07E-01 | 0.40  | 9.50E-01 | EGA2-1 |
| ENSMMUG000000044256  |              |                                                        | 0.79   | 2.12   | 6.55   | 6.45   | 1.40  | 1.56E-03 | 0.78  | 9.85E-02 | 0.69  | 3.39E-01 | EGA2-1 |
| ENSMMUG0000000045827 | LOC720141    | Zinc Finger Protein 347                                | 0.36   | 1.64   | 6.43   | 2.24   | 2.42  | 2.03E-02 | 1.06  | 3.67E-01 | -0.84 | 6.97E-01 | EGA2-1 |
| ENSMMUG000000006778  | LOC720214    | Zinc Finger Protein 761                                | 9.29   | 25.86  | 22.90  | 10.08  | 1.40  | 3.93E-02 | -0.77 | 3.03E-01 | -0.90 | 4.24E-01 | EGA2-1 |
| ENSMMUG000000011256  |              |                                                        | 5.84   | 15.68  | 15.59  | 19.96  | 1.21  | 2.92E-02 | -0.23 | 7.53E-01 | 0.03  | 9.87E-01 | EGA2-1 |
| ENSMMUG000000046065  |              |                                                        | 0.00   | 7.35   | 2.39   | 7.54   | 18.88 | 1.64E-11 | 0.80  | 8.53E-01 | 4.03  | 4.31E-01 | EGA2-1 |
| ENSMMUG000000033196  | MIR373       | MicroRNA 373                                           | 0.00   | 17.57  | 21.75  | 43.61  | 4.62  | 1.62E-02 | 1.23  | 5.59E-01 | 1.27  | 7.40E-01 | EGA2-1 |
| ENSMMUG000000022296  | TFPT         | TCF3 Fusion Partner                                    | 2.06   | 10.67  | 6.10   | 2.18   | 2.22  | 3.23E-02 | -0.46 | 7.37E-01 | -0.30 | 9.20E-01 | EGA2-1 |
| ENSMMUG000000022552  | RPS9         | Ribosomal Protein S9                                   | 3.08   | 25.74  | 23.34  | 23.29  | 3.03  | 5.14E-08 | -0.13 | 8.78E-01 | -0.09 | 9.68E-01 | EGA2-1 |
| ENSMMUG000000015901  | RPL28        | Ribosomal Protein L28                                  | 71.81  | 326.98 | 306.93 | 179.20 | 2.37  | 9.35E-04 | -0.83 | 3.23E-01 | -0.25 | 9.05E-01 | EGA2-1 |
| ENSMMUG000000017267  | MZF1         | Myeloid Zinc Finger 1                                  | 0.08   | 1.14   | 0.53   | 0.72   | 5.63  | 7.55E-05 | -2.53 | 9.79E-02 | 3.12  | 1.49E-01 | EGA2-1 |
| ENSMMUG000000020051  | TRIM28       | Tripartite Motif Containing 28                         | 2.84   | 32.05  | 45.83  | 47.23  | 3.36  | 3.61E-05 | -0.07 | 9.57E-01 | -0.26 | 9.17E-01 | EGA2-1 |
| ENSMMUG000000008729  | RPS5         | Ribosomal Protein S5                                   | 22.15  | 140.25 | 121.83 | 77.79  | 2.67  | 6.26E-09 | -0.12 | 8.71E-01 | -0.95 | 1.95E-01 | EGA2-1 |
| ENSMMUG000000005338  | ZNF586       | Zinc Finger Protein 586                                | 0.69   | 7.25   | 6.38   | 3.52   | 4.46  | 4.68E-09 | -0.57 | 5.78E-01 | -0.83 | 6.06E-01 | EGA2-1 |
| ENSMMUG000000005336  | ZNF551       | Zinc Finger Protein 551                                | 0.22   | 7.96   | 5.85   | 3.63   | 5.33  | 4.59E-13 | -0.94 | 3.09E-01 | -0.36 | 8.66E-01 | EGA2-1 |
| ENSMMUG000000006122  | ZNF550       | Zinc Finger Protein 550                                | 0.24   | 1.39   | 2.23   | 0.81   | 3.06  | 1.31E-02 | -0.35 | 8.41E-01 | -1.49 | 4.94E-01 | EGA2-1 |
| ENSMMUG000000014285  | ZNF772       | Zinc Finger Protein 772                                | 0.08   | 2.15   | 1.26   | 1.08   | 4.26  | 1.24E-03 | -0.32 | 8.69E-01 | -0.08 | 9.87E-01 | EGA2-1 |
| ENSMMUG000000019285  | ZNF460       | Zinc Finger Protein 460                                | 2.62   | 9.94   | 16.11  | 12.28  | 2.18  | 8.20E-04 | 1.03  | 1.53E-01 | -0.70 | 5.83E-01 | EGA2-1 |
| ENSMMUG000000031713  | LOC106995399 | Cytochrome C-like                                      | 42.73  | 173.03 | 230.53 | 142.40 | 1.94  | 1.07E-03 | 0.56  | 4.38E-01 | -0.48 | 7.17E-01 | EGA2-1 |
| ENSMMUG000000043966  | DDX3Y        | DEAD-box Helicase 3, Y-linked                          | 0.47   | 15.68  | 8.53   | 12.57  | 4.07  | 3.37E-04 | -0.75 | 6.14E-01 | 0.77  | 7.82E-01 | EGA2-1 |
| ENSMMUG000000049104  | CYHYorf15B   | Chromosome Y Open Reading Frame, Human CYorf15B        | 0.08   | 2.31   | 1.39   | 0.78   | 3.65  | 1.29E-02 | -0.56 | 7.79E-01 | -1.21 | 6.93E-01 | EGA2-1 |
| ENSMMUG000000043974  | LOC701774    | Ral-GDS-related Protein-like                           | 0.17   | 0.89   | 0.51   | 0.34   | 3.58  | 9.45E-03 | -1.47 | 3.54E-01 | 0.03  | 9.96E-01 | EGA2-1 |
| ENSMMUG000000047658  |              |                                                        | 13.47  | 72.44  | 65.92  | 46.81  | 1.79  | 3.25E-02 | -0.35 | 7.55E-01 | 0.76  | 6.43E-01 | EGA2-1 |
| ENSMMUG000000030262  | LOC705682    | Translation Machinery-associated Protein 16 Pseudogene | 0.49   | 4.68   | 4.34   | 4.72   | 3.29  | 1.29E-04 | 0.41  | 7.27E-01 | 0.76  | 6.88E-01 | EGA2-1 |
| ENSMMUG000000017077  | LOC701714    | Zinc Finger Protein 37A                                | 0.60   | 4.28   | 12.74  | 4.41   | 2.62  | 4.96E-03 | 1.25  | 2.26E-01 | -0.61 | 7.79E-01 | EGA2-1 |
| ENSMMUG000000006020  |              |                                                        | 247.99 | 642.32 | 563.60 | 329.87 | 1.22  | 7.36E-05 | -0.31 | 4.12E-01 | -0.48 | 3.58E-01 | EGA2-1 |

|                    |              |                                                               |        |        |        |        |       |          |       |          |       |          |        |
|--------------------|--------------|---------------------------------------------------------------|--------|--------|--------|--------|-------|----------|-------|----------|-------|----------|--------|
| ENSMMUG00000047191 | LOC698928    | X Antigen Family Member 5-like                                | 0.02   | 5.54   | 19.54  | 3.03   | 8.46  | 1.76E-06 | 0.82  | 7.19E-01 | 2.06  | 5.16E-01 | EGA2-1 |
| ENSMMUG00000040909 |              |                                                               | 0.03   | 4.47   | 1.49   | 0.78   | 8.19  | 6.67E-10 | -1.40 | 3.57E-01 | 0.70  | 8.35E-01 | EGA2-1 |
| ENSMMUG00000042674 |              |                                                               | 0.00   | 9.32   | 8.99   | 11.28  | 5.71  | 7.30E-03 | 1.46  | 5.33E-01 | 0.60  | 9.19E-01 | EGA2-1 |
| ENSMMUG00000017295 |              |                                                               | 137.67 | 744.41 | 588.30 | 438.93 | 2.31  | 1.06E-11 | -0.51 | 2.15E-01 | -0.24 | 7.89E-01 | EGA2-1 |
| ENSMMUG00000049253 |              |                                                               | 0.00   | 1.85   | 5.50   | 2.16   | 7.21  | 8.70E-04 | 0.68  | 8.10E-01 | 1.98  | 6.36E-01 | EGA2-1 |
| ENSMMUG00000043101 |              |                                                               | 0.02   | 3.59   | 3.30   | 0.83   | 5.09  | 8.22E-06 | 2.07  | 9.63E-02 | -2.68 | 1.03E-01 | EGA2-1 |
| ENSMMUG00000040689 |              |                                                               | 0.06   | 1.72   | 14.76  | 1.13   | 4.67  | 4.50E-03 | -1.66 | 3.69E-01 | 2.25  | 4.02E-01 | EGA2-1 |
| ENSMMUG00000032421 |              |                                                               | 53.75  | 277.26 | 399.43 | 375.24 | 2.39  | 1.04E-07 | 0.46  | 4.20E-01 | 0.01  | 9.94E-01 | EGA2-1 |
| ENSMMUG00000044709 | LOC723473    | Patr Class I Histocompatibility Antigen, B-1 Alpha Chain-like | 0.07   | 0.47   | 1.02   | 0.19   | 4.22  | 2.55E-02 | 0.60  | 8.04E-01 | -4.32 | 7.76E-02 | EGA2-1 |
| ENSMMUG00000037636 |              |                                                               | 0.01   | 6.69   | 0.76   | 1.46   | 8.96  | 8.48E-06 | -2.68 | 2.21E-01 | 0.40  | 9.59E-01 | EGA2-1 |
| ENSMMUG00000041305 | LOC100424348 | HLA Class I Histocompatibility Antigen, B-14 Alpha Chain like | 0.48   | 3.54   | 6.31   | 1.77   | 3.19  | 1.40E-02 | -0.72 | 6.66E-01 | -1.16 | 6.61E-01 | EGA2-1 |
| ENSMMUG00000038387 |              |                                                               | 59.44  | 118.61 | 207.67 | 281.21 | 3.14  | 4.84E-02 | -2.69 | 9.06E-02 | 1.28  | 7.24E-01 | EGA2-1 |
| ENSMMUG00000039687 | MAMU-I       | Major Histocompatibility Complex, Class I, I                  | 0.46   | 5.49   | 3.10   | 1.27   | 4.63  | 3.47E-04 | -1.13 | 4.82E-01 | -1.66 | 4.89E-01 | EGA2-1 |
| ENSMMUG00000032482 | LOC693973    | Protein FAM90A1-like                                          | 0.01   | 1.23   | 0.06   | 0.00   | 7.40  | 1.76E-02 | -5.55 | 8.41E-02 | -0.99 | 9.12E-01 | EGA2-1 |
| ENSMMUG00000047461 | LOC714964    | HLA Class I Histocompatibility Antigen, B-67 Alpha Chain like | 0.14   | 1.06   | 0.81   | 0.41   | 2.58  | 1.40E-02 | 0.61  | 6.47E-01 | -1.04 | 6.09E-01 | EGA2-1 |
| ENSMMUG00000044155 | LOC706140    | Nuclear RNA Export Factor 2                                   | 0.00   | 4.52   | 4.01   | 2.12   | 11.69 | 1.77E-15 | -0.47 | 7.99E-01 | -0.60 | 8.67E-01 | EGA2-1 |
| ENSMMUG00000040552 |              |                                                               | 0.23   | 0.81   | 0.84   | 0.50   | 2.43  | 1.45E-02 | -0.01 | 9.96E-01 | 0.19  | 9.58E-01 | EGA2-1 |
| ENSMMUG00000041580 |              |                                                               | 11.20  | 159.40 | 279.07 | 389.50 | 3.92  | 1.95E-04 | 0.22  | 8.93E-01 | 0.67  | 7.99E-01 | EGA2-1 |
| ENSMMUG00000046218 | XAGE5        | X Antigen Family, Member 5                                    | 0.09   | 2.55   | 15.83  | 6.17   | 6.05  | 1.25E-06 | 1.79  | 1.63E-01 | 1.44  | 5.14E-01 | EGA2-1 |
| ENSMMUG00000041909 |              |                                                               | 0.10   | 4.44   | 0.78   | 0.51   | 4.14  | 8.66E-04 | -0.40 | 8.24E-01 | -1.63 | 4.87E-01 | EGA2-1 |
| ENSMMUG00000049103 |              |                                                               | 0.25   | 1.26   | 2.67   | 0.10   | 2.62  | 3.77E-02 | -1.87 | 1.63E-01 | -2.54 | 1.68E-01 | EGA2-1 |
| ENSMMUG00000042405 | LOC106996511 | Histone H4                                                    | 0.46   | 16.87  | 29.70  | 24.40  | 6.03  | 4.45E-11 | 0.13  | 9.31E-01 | -0.66 | 7.74E-01 | EGA2-1 |
| ENSMMUG00000043274 |              |                                                               | 25.59  | 63.28  | 74.60  | 93.95  | 1.82  | 1.68E-02 | -0.35 | 7.28E-01 | 0.22  | 9.23E-01 | EGA2-1 |
| ENSMMUG00000032390 |              |                                                               | 0.00   | 10.43  | 2.75   | 1.84   | 11.19 | 1.35E-14 | -1.12 | 4.64E-01 | -0.19 | 9.68E-01 | EGA2-1 |
| ENSMMUG00000039802 |              |                                                               | 0.01   | 0.71   | 0.27   | 0.04   | 8.00  | 4.60E-02 | -5.72 | 1.70E-01 | -0.43 | 9.75E-01 | EGA2-1 |
| ENSMMUG00000041144 |              |                                                               | 0.19   | 1.64   | 1.50   | 0.55   | 3.53  | 6.31E-03 | -0.01 | 9.95E-01 | -1.84 | 4.17E-01 | EGA2-1 |
| ENSMMUG00000038971 |              |                                                               | 0.14   | 2.36   | 1.26   | 0.41   | 6.02  | 2.03E-02 | -1.22 | 7.16E-01 | -3.64 | 3.77E-01 | EGA2-1 |
| ENSMMUG00000044528 |              |                                                               | 0.00   | 1.98   | 0.23   | 0.64   | 26.11 | 4.28E-05 | -7.94 | 2.96E-01 | 6.30  | 6.40E-01 | EGA2-1 |
| ENSMMUG00000043058 |              |                                                               | 0.14   | 0.72   | 0.24   | 0.44   | 7.34  | 4.89E-02 | -3.70 | 3.63E-01 | 3.34  | 6.37E-01 | EGA2-1 |
| ENSMMUG00000041360 |              |                                                               | 9.91   | 166.64 | 286.34 | 380.99 | 4.32  | 6.80E-05 | 0.34  | 8.35E-01 | 0.62  | 8.26E-01 | EGA2-1 |
| ENSMMUG00000046650 |              |                                                               | 0.94   | 9.09   | 31.04  | 56.84  | 4.54  | 3.01E-03 | -0.59 | 7.65E-01 | 0.30  | 9.55E-01 | EGA2-1 |
| ENSMMUG00000043052 |              |                                                               | 0.09   | 3.18   | 0.98   | 0.11   | 4.96  | 1.42E-02 | -3.88 | 6.93E-02 | -1.99 | 6.30E-01 | EGA2-1 |
| ENSMMUG00000037835 |              |                                                               | 0.05   | 0.32   | 0.42   | 0.91   | 5.31  | 3.89E-02 | -0.55 | 8.74E-01 | 1.74  | 7.47E-01 | EGA2-1 |
| ENSMMUG00000044269 |              |                                                               | 0.83   | 9.59   | 25.97  | 43.99  | 3.87  | 7.66E-03 | -0.08 | 9.71E-01 | 0.17  | 9.74E-01 | EGA2-1 |
| ENSMMUG00000038003 |              |                                                               | 0.06   | 0.99   | 0.81   | 4.53   | 3.50  | 4.99E-02 | 2.10  | 2.45E-01 | -0.01 | 9.99E-01 | EGA2-1 |
| ENSMMUG00000016129 |              |                                                               | 53.38  | 216.44 | 264.74 | 210.32 | 2.07  | 1.02E-08 | 0.17  | 7.50E-01 | -0.31 | 7.14E-01 | EGA2-1 |
| ENSMMUG00000047965 |              |                                                               | 0.07   | 2.06   | 10.71  | 5.25   | 4.34  | 1.47E-03 | 1.69  | 2.66E-01 | 1.03  | 7.33E-01 | EGA2-1 |
| ENSMMUG00000037866 |              |                                                               | 10.14  | 141.72 | 236.00 | 356.83 | 4.22  | 3.37E-04 | 0.13  | 9.44E-01 | 0.73  | 8.03E-01 | EGA2-1 |
| ENSMMUG00000039428 |              |                                                               | 6.84   | 17.92  | 33.80  | 43.11  | 1.75  | 4.67E-02 | 0.83  | 3.99E-01 | 1.43  | 2.74E-01 | EGA2-1 |
| ENSMMUG00000015963 |              |                                                               | 2.12   | 34.29  | 39.29  | 32.58  | 3.77  | 1.02E-15 | 0.59  | 3.26E-01 | -0.11 | 9.50E-01 | EGA2-1 |
| ENSMMUG00000030177 | MRPS21       | Mitochondrial Ribosomal Protein S21                           | 21.46  | 115.84 | 71.42  | 26.83  | 2.15  | 1.45E-02 | -1.28 | 1.76E-01 | -0.67 | 7.23E-01 | EGA2-1 |
| ENSMMUG00000040720 |              |                                                               | 0.00   | 0.21   | 1.00   | 1.05   | 27.84 | 1.25E-05 | -9.13 | 2.21E-01 | 3.06  | 8.63E-01 | EGA2-1 |
| ENSMMUG00000040208 |              |                                                               | 4.25   | 15.76  | 8.82   | 4.20   | 1.86  | 4.82E-03 | -0.91 | 2.18E-01 | -0.77 | 5.36E-01 | EGA2-1 |
| ENSMMUG00000029402 |              |                                                               | 58.10  | 142.05 | 136.29 | 161.14 | 1.12  | 3.45E-02 | -0.30 | 6.54E-01 | -0.29 | 8.14E-01 | EGA2-1 |
| ENSMMUG00000039135 |              |                                                               | 0.03   | 10.88  | 1.52   | 1.69   | 10.46 | 9.46E-09 | -2.04 | 2.98E-01 | 1.12  | 7.92E-01 | EGA2-1 |
| ENSMMUG00000049098 | LOC714524    | Pepsin A-1-like                                               | 0.61   | 2.38   | 4.41   | 4.28   | 4.40  | 1.62E-03 | -0.29 | 8.84E-01 | 1.76  | 4.68E-01 | EGA2-1 |
| ENSMMUG00000038408 |              |                                                               | 16.10  | 46.85  | 47.41  | 38.77  | 1.44  | 9.39E-03 | 0.16  | 8.43E-01 | 0.06  | 9.75E-01 | EGA2-1 |
| ENSMMUG00000032562 |              |                                                               | 3.13   | 14.91  | 24.39  | 22.38  | 2.52  | 2.64E-02 | -0.15 | 9.32E-01 | 0.08  | 9.85E-01 | EGA2-1 |
| ENSMMUG00000018968 |              |                                                               | 12.08  | 52.80  | 70.62  | 36.72  | 1.78  | 4.94E-02 | -0.08 | 9.53E-01 | 0.67  | 7.22E-01 | EGA2-1 |
| ENSMMUG00000010012 | LOC106996241 | WD Repeat-containing Protein 55-like                          | 0.11   | 7.48   | 3.18   | 3.38   | 6.63  | 1.43E-04 | -1.30 | 5.22E-01 | 0.45  | 9.34E-01 | EGA2-1 |

|                    |           |                                                            |        |        |         |        |      |          |       |          |       |          |        |
|--------------------|-----------|------------------------------------------------------------|--------|--------|---------|--------|------|----------|-------|----------|-------|----------|--------|
| ENSMMUG00000044507 |           |                                                            | 55.85  | 339.34 | 591.46  | 609.50 | 2.82 | 1.03E-05 | 0.91  | 2.28E-01 | 0.81  | 5.06E-01 | EGA2-1 |
| ENSMMUG00000011856 |           |                                                            | 20.24  | 116.79 | 75.75   | 122.73 | 2.35 | 2.71E-02 | -0.99 | 4.14E-01 | 0.09  | 9.82E-01 | EGA2-1 |
| ENSMMUG00000039814 |           |                                                            | 0.67   | 7.47   | 25.67   | 42.33  | 5.04 | 6.02E-04 | -0.16 | 9.42E-01 | -0.09 | 9.87E-01 | EGA2-1 |
| ENSMMUG00000044849 |           |                                                            | 6.06   | 18.66  | 40.58   | 44.17  | 1.79 | 3.43E-02 | 1.08  | 2.34E-01 | -0.20 | 9.39E-01 | EGA2-1 |
| ENSMMUG00000048170 |           |                                                            | 19.30  | 83.70  | 104.77  | 77.49  | 2.31 | 1.50E-02 | -0.19 | 8.90E-01 | -0.43 | 8.62E-01 | EGA2-1 |
| ENSMMUG00000003663 |           |                                                            | 0.09   | 6.76   | 1.68    | 1.95   | 6.91 | 2.84E-02 | -1.92 | 6.01E-01 | 1.04  | 9.02E-01 | EGA2-1 |
| ENSMMUG00000046602 |           |                                                            | 2.36   | 41.01  | 2.99    | 11.59  | 3.64 | 1.07E-02 | -2.68 | 7.78E-02 | 1.32  | 6.70E-01 | EGA2-1 |
| ENSMMUG00000039068 |           |                                                            | 7.19   | 123.12 | 121.15  | 36.27  | 3.61 | 1.27E-03 | 0.05  | 9.76E-01 | -1.03 | 6.61E-01 | EGA2-1 |
| ENSMMUG00000044032 |           |                                                            | 14.69  | 73.76  | 99.15   | 103.71 | 2.21 | 5.99E-05 | 0.16  | 8.52E-01 | 0.24  | 8.81E-01 | EGA2-1 |
| ENSMMUG00000040642 |           |                                                            | 141.11 | 421.51 | 232.95  | 162.31 | 1.48 | 8.82E-03 | -0.67 | 2.96E-01 | -0.36 | 7.84E-01 | EGA2-1 |
| ENSMMUG00000032479 |           |                                                            | 19.79  | 108.59 | 163.97  | 164.38 | 2.60 | 1.79E-04 | 0.58  | 5.06E-01 | 0.88  | 5.00E-01 | EGA2-1 |
| ENSMMUG00000039825 |           |                                                            | 1.55   | 9.87   | 22.41   | 15.77  | 2.23 | 4.82E-02 | 2.07  | 6.08E-02 | -0.28 | 9.36E-01 | EGA2-1 |
| ENSMMUG00000040042 |           |                                                            | 10.59  | 59.45  | 102.34  | 90.41  | 2.55 | 5.81E-09 | 0.63  | 2.32E-01 | 0.22  | 8.60E-01 | EGA2-1 |
| ENSMMUG00000012134 |           |                                                            | 5.10   | 38.89  | 77.10   | 81.61  | 3.00 | 2.48E-03 | 0.86  | 4.75E-01 | -0.61 | 8.03E-01 | EGA2-1 |
| ENSMMUG00000041269 |           |                                                            | 0.61   | 20.30  | 1.66    | 7.32   | 5.12 | 2.93E-03 | -1.58 | 4.30E-01 | -0.29 | 9.64E-01 | EGA2-1 |
| ENSMMUG00000047918 |           |                                                            | 0.22   | 13.35  | 200.12  | 277.30 | 5.46 | 8.67E-07 | 5.38  | 3.62E-07 | -1.58 | 4.11E-01 | EGA2-2 |
| ENSMMUG00000045301 |           |                                                            | 0.56   | 22.75  | 216.76  | 243.54 | 6.15 | 1.10E-07 | 2.61  | 2.83E-02 | 0.37  | 9.15E-01 | EGA2-2 |
| ENSMMUG00000020035 |           |                                                            | 124.32 | 324.97 | 776.72  | 505.80 | 1.35 | 5.81E-04 | 1.45  | 1.80E-04 | -0.94 | 8.76E-02 | EGA2-2 |
| ENSMMUG00000009951 | MARCKSL1  | MARCKS Like 1                                              | 0.35   | 4.95   | 21.18   | 6.89   | 4.71 | 1.37E-06 | 2.42  | 1.84E-02 | -2.00 | 1.81E-01 | EGA2-2 |
| ENSMMUG00000009188 | CAP1      | Cyclase Associated Actin Cytoskeleton Regulatory Protein 1 | 9.59   | 26.48  | 48.28   | 67.97  | 1.30 | 4.26E-03 | 1.09  | 1.79E-02 | 0.17  | 8.94E-01 | EGA2-2 |
| ENSMMUG00000015270 | RPS8      | Ribosomal Protein S8                                       | 73.42  | 289.55 | 540.67  | 491.80 | 2.12 | 3.22E-08 | 1.07  | 9.50E-03 | -0.30 | 7.47E-01 | EGA2-2 |
| ENSMMUG00000032153 |           |                                                            | 3.92   | 17.28  | 42.25   | 37.34  | 2.01 | 6.41E-06 | 1.57  | 3.41E-04 | -0.64 | 4.21E-01 | EGA2-2 |
| ENSMMUG00000044960 |           |                                                            | 24.63  | 65.70  | 222.95  | 247.40 | 1.57 | 1.07E-03 | 2.03  | 1.14E-05 | -0.05 | 9.77E-01 | EGA2-2 |
| ENSMMUG00000009954 |           |                                                            | 11.49  | 23.99  | 72.39   | 53.29  | 0.99 | 4.34E-02 | 1.84  | 3.83E-05 | -0.40 | 6.93E-01 | EGA2-2 |
| ENSMMUG00000009272 |           |                                                            | 32.78  | 109.89 | 321.49  | 257.91 | 1.68 | 1.34E-04 | 1.57  | 3.79E-04 | -0.11 | 9.46E-01 | EGA2-2 |
| ENSMMUG00000038785 |           |                                                            | 49.40  | 187.84 | 413.27  | 286.62 | 2.02 | 1.04E-06 | 1.08  | 1.51E-02 | -0.32 | 7.43E-01 | EGA2-2 |
| ENSMMUG00000045959 |           |                                                            | 47.50  | 105.66 | 175.94  | 156.14 | 1.18 | 2.62E-03 | 0.97  | 1.41E-02 | -0.35 | 6.69E-01 | EGA2-2 |
| ENSMMUG00000016388 | FRRS1     | Ferric Chelate Reductase 1                                 | 0.05   | 3.44   | 30.05   | 34.89  | 6.33 | 3.63E-12 | 3.74  | 2.22E-05 | -0.16 | 9.64E-01 | EGA2-2 |
| ENSMMUG00000003311 | WDR77     | WD Repeat Domain 77                                        | 0.63   | 4.37   | 20.02   | 6.64   | 3.07 | 4.58E-03 | 2.24  | 4.31E-02 | -0.76 | 7.59E-01 | EGA2-2 |
| ENSMMUG00000003313 |           |                                                            | 9.29   | 29.30  | 127.32  | 144.65 | 1.41 | 2.74E-02 | 2.38  | 5.03E-05 | 0.22  | 9.02E-01 | EGA2-2 |
| ENSMMUG00000006787 | BCL2L15   | BCL2 Like 15                                               | 0.08   | 15.54  | 76.01   | 14.37  | 5.80 | 3.70E-07 | 2.77  | 2.18E-02 | -1.97 | 2.92E-01 | EGA2-2 |
| ENSMMUG00000021259 | CGN       | Cingulin                                                   | 0.08   | 1.14   | 6.18    | 11.96  | 5.61 | 2.35E-07 | 3.19  | 3.68E-03 | -0.15 | 9.72E-01 | EGA2-2 |
| ENSMMUG00000031532 | LOC719770 | 60S Ribosomal Protein L36 Pseudogene                       | 10.01  | 37.32  | 74.84   | 57.12  | 1.98 | 9.39E-08 | 0.96  | 1.63E-02 | -0.42 | 5.84E-01 | EGA2-2 |
| ENSMMUG00000039975 |           |                                                            | 3.50   | 36.18  | 89.41   | 57.60  | 2.76 | 1.35E-03 | 2.41  | 5.10E-03 | -0.28 | 9.13E-01 | EGA2-2 |
| ENSMMUG00000012068 | SIPA1L2   | Signal Induced Proliferation Associated 1 Like 2           | 0.02   | 1.79   | 4.73    | 4.07   | 6.71 | 1.06E-18 | 1.66  | 2.75E-02 | -0.40 | 8.33E-01 | EGA2-2 |
| ENSMMUG00000022179 |           |                                                            | 5.48   | 21.90  | 59.03   | 52.56  | 1.92 | 1.50E-03 | 1.78  | 3.02E-03 | 0.16  | 9.38E-01 | EGA2-2 |
| ENSMMUG00000022310 | DESI2     | Desumoylating Isopeptidase 2                               | 1.22   | 6.15   | 19.74   | 13.58  | 1.89 | 3.65E-02 | 2.04  | 1.97E-02 | 0.55  | 7.90E-01 | EGA2-2 |
| ENSMMUG00000022112 | DPPA2     | Developmental Pluripotency Associated 2                    | 0.11   | 6.38   | 87.13   | 301.61 | 4.83 | 3.98E-07 | 4.67  | 3.17E-07 | 0.57  | 8.11E-01 | EGA2-2 |
| ENSMMUG00000016901 | LOC699439 | Developmental Pluripotency-associated Protein 4-like       | 0.03   | 1.45   | 28.31   | 64.68  | 5.44 | 8.30E-06 | 4.52  | 3.65E-05 | 1.04  | 6.68E-01 | EGA2-2 |
| ENSMMUG00000020740 | ATP6V1A   | ATPase H+ Transporting V1 Subunit A                        | 2.41   | 25.25  | 96.20   | 105.16 | 3.52 | 4.59E-05 | 1.90  | 4.10E-02 | 0.39  | 8.72E-01 | EGA2-2 |
| ENSMMUG00000020716 |           |                                                            | 13.72  | 59.77  | 105.75  | 108.92 | 1.80 | 6.10E-05 | 1.24  | 7.74E-03 | -0.08 | 9.65E-01 | EGA2-2 |
| ENSMMUG0000001340  | RPL32     | Ribosomal Protein L32                                      | 35.46  | 165.13 | 417.24  | 352.70 | 2.09 | 4.54E-05 | 1.92  | 1.98E-04 | -0.43 | 7.10E-01 | EGA2-2 |
| ENSMMUG00000015672 | PDHB      | Pyruvate Dehydrogenase E1 Beta Subunit                     | 1.62   | 7.32   | 50.06   | 52.60  | 2.26 | 1.84E-03 | 2.86  | 4.54E-05 | -0.10 | 9.69E-01 | EGA2-2 |
| ENSMMUG00000004800 | SLMAP     | Sarcolemma Associated Protein                              | 0.90   | 5.10   | 14.35   | 16.37  | 2.47 | 6.61E-05 | 1.57  | 1.59E-02 | -0.02 | 9.93E-01 | EGA2-2 |
| ENSMMUG00000005656 | IMPDH2    | Inosine Monophosphate Dehydrogenase 2                      | 3.69   | 9.95   | 27.28   | 21.83  | 1.46 | 4.04E-03 | 1.65  | 8.01E-04 | -0.62 | 5.00E-01 | EGA2-2 |
| ENSMMUG00000042008 | LOC700534 | 60S Ribosomal Protein L14                                  | 53.40  | 189.58 | 419.80  | 281.76 | 1.73 | 5.55E-06 | 1.27  | 1.33E-03 | -0.52 | 4.60E-01 | EGA2-2 |
| ENSMMUG00000022965 | RPSA      | Ribosomal Protein SA                                       | 28.52  | 84.22  | 215.00  | 225.52 | 1.85 | 7.58E-05 | 1.34  | 5.56E-03 | 0.09  | 9.59E-01 | EGA2-2 |
| ENSMMUG00000004847 | XYLB      | Xylulokinase                                               | 0.03   | 1.34   | 4.65    | 2.80   | 3.50 | 1.13E-02 | 2.77  | 4.62E-02 | -1.26 | 6.47E-01 | EGA2-2 |
| ENSMMUG00000010630 |           |                                                            | 169.61 | 374.69 | 1597.77 | 790.39 | 1.18 | 3.11E-02 | 1.50  | 4.11E-03 | -0.83 | 3.24E-01 | EGA2-2 |



|                    |              |                                                                    |       |        |        |        |      |          |      |          |       |          |        |
|--------------------|--------------|--------------------------------------------------------------------|-------|--------|--------|--------|------|----------|------|----------|-------|----------|--------|
| ENSMMUG00000022881 | RPL22L1      | Ribosomal Protein L22 Like 1                                       | 0.85  | 7.56   | 22.34  | 16.43  | 3.10 | 2.50E-04 | 2.40 | 5.18E-03 | -0.67 | 7.26E-01 | EGA2-2 |
| ENSMMUG00000047632 |              |                                                                    | 4.54  | 20.75  | 42.34  | 40.41  | 2.19 | 3.77E-04 | 1.31 | 4.57E-02 | -0.45 | 7.58E-01 | EGA2-2 |
| ENSMMUG00000013952 | LOC716150    | 60S Ribosomal Protein L9 Pseudogene                                | 5.55  | 17.45  | 46.56  | 40.47  | 1.46 | 2.84E-04 | 1.57 | 6.87E-05 | -0.01 | 9.95E-01 | EGA2-2 |
| ENSMMUG00000042089 |              |                                                                    | 1.51  | 5.54   | 11.58  | 14.10  | 1.47 | 4.28E-04 | 1.27 | 2.43E-03 | 0.24  | 8.23E-01 | EGA2-2 |
| ENSMMUG00000031431 | LOC100423295 | Putative 60S Ribosomal Protein L39-like 5                          | 1.64  | 12.59  | 37.49  | 37.10  | 3.19 | 7.18E-05 | 2.23 | 4.55E-03 | -0.99 | 5.05E-01 | EGA2-2 |
| ENSMMUG00000017867 | LOC706181    | 60S Ribosomal Protein L36a-like                                    | 11.86 | 44.10  | 100.57 | 70.88  | 2.11 | 3.26E-06 | 1.01 | 4.03E-02 | -0.30 | 7.99E-01 | EGA2-2 |
| ENSMMUG00000014776 |              |                                                                    | 0.01  | 0.28   | 5.10   | 18.77  | 3.39 | 1.56E-02 | 5.66 | 3.98E-07 | 0.16  | 9.69E-01 | EGA2-2 |
| ENSMMUG00000044585 | ATP5I        | ATP Synthase, H+ Transporting, Mitochondrial Fo Complex Subunit E  | 0.68  | 3.89   | 16.15  | 15.73  | 2.28 | 9.03E-03 | 2.64 | 1.80E-03 | -0.22 | 9.37E-01 | EGA2-2 |
| ENSMMUG00000021695 | MRFAP1       | Morf4 Family Associated Protein 1                                  | 41.66 | 90.72  | 183.75 | 191.26 | 1.12 | 2.29E-02 | 0.97 | 4.91E-02 | 0.06  | 9.73E-01 | EGA2-2 |
| ENSMMUG00000003363 | KLF3         | Kruppel Like Factor 3                                              | 2.64  | 59.97  | 122.70 | 71.22  | 4.06 | 5.92E-12 | 1.43 | 2.96E-02 | -0.91 | 4.11E-01 | EGA2-2 |
| ENSMMUG00000008553 | RPL9         | Ribosomal Protein L9                                               | 52.18 | 183.69 | 395.52 | 304.95 | 1.83 | 5.63E-06 | 1.27 | 2.47E-03 | -0.42 | 6.17E-01 | EGA2-2 |
| ENSMMUG00000012036 | RBM47        | RNA Binding Motif Protein 47                                       | 0.25  | 2.96   | 14.95  | 20.84  | 3.50 | 2.33E-08 | 2.54 | 7.45E-05 | 0.83  | 4.87E-01 | EGA2-2 |
| ENSMMUG00000021379 |              |                                                                    | 12.25 | 53.66  | 91.33  | 82.88  | 2.21 | 5.05E-14 | 0.89 | 5.45E-03 | -0.38 | 5.29E-01 | EGA2-2 |
| ENSMMUG00000040298 |              |                                                                    | 5.96  | 29.48  | 66.83  | 58.97  | 2.06 | 3.95E-04 | 1.70 | 3.84E-03 | -0.38 | 7.86E-01 | EGA2-2 |
| ENSMMUG00000040192 |              |                                                                    | 23.39 | 59.56  | 210.28 | 237.38 | 1.52 | 1.29E-03 | 2.11 | 3.07E-06 | -0.07 | 9.69E-01 | EGA2-2 |
| ENSMMUG00000044360 |              |                                                                    | 46.48 | 241.22 | 448.70 | 318.31 | 2.26 | 1.13E-09 | 1.13 | 4.73E-03 | -0.53 | 4.47E-01 | EGA2-2 |
| ENSMMUG00000039958 |              |                                                                    | 37.18 | 163.83 | 387.46 | 310.10 | 1.75 | 1.43E-04 | 1.94 | 1.89E-05 | -0.75 | 3.26E-01 | EGA2-2 |
| ENSMMUG00000040278 |              |                                                                    | 32.57 | 186.37 | 408.75 | 361.04 | 2.33 | 1.31E-08 | 1.41 | 1.04E-03 | -0.64 | 3.94E-01 | EGA2-2 |
| ENSMMUG00000009066 | LOC696134    | 60S Ribosomal Protein L26                                          | 64.06 | 234.54 | 414.42 | 345.23 | 1.85 | 5.80E-07 | 1.04 | 8.59E-03 | -0.40 | 6.01E-01 | EGA2-2 |
| ENSMMUG00000038876 |              |                                                                    | 14.63 | 87.60  | 182.19 | 155.66 | 2.27 | 3.04E-07 | 1.06 | 2.63E-02 | -0.41 | 6.79E-01 | EGA2-2 |
| ENSMMUG00000030169 | LOC708833    | 40S Ribosomal Protein S17 Pseudogene                               | 15.50 | 59.53  | 116.54 | 103.19 | 1.78 | 1.90E-05 | 1.30 | 2.47E-03 | -0.45 | 6.02E-01 | EGA2-2 |
| ENSMMUG00000030156 |              |                                                                    | 3.06  | 106.30 | 469.91 | 525.28 | 5.36 | 5.50E-11 | 2.55 | 3.84E-03 | -0.30 | 9.07E-01 | EGA2-2 |
| ENSMMUG00000022958 | LOC696015    | 40S Ribosomal Protein S8 Pseudogene                                | 18.54 | 81.77  | 177.23 | 173.26 | 2.42 | 4.26E-10 | 1.28 | 1.90E-03 | -0.28 | 7.72E-01 | EGA2-2 |
| ENSMMUG00000014173 | ATP5F1       | ATP Synthase, H+ Transporting, Mitochondrial Fo Complex Subunit B1 | 6.86  | 21.47  | 91.96  | 98.78  | 1.35 | 4.60E-02 | 2.38 | 1.07E-04 | 0.13  | 9.54E-01 | EGA2-2 |
| ENSMMUG00000002676 |              |                                                                    | 63.89 | 253.91 | 722.92 | 644.64 | 1.89 | 1.74E-05 | 1.69 | 1.37E-04 | -0.14 | 9.22E-01 | EGA2-2 |
| ENSMMUG00000041268 |              |                                                                    | 3.65  | 17.59  | 72.04  | 50.48  | 2.28 | 4.12E-03 | 2.11 | 7.35E-03 | -0.61 | 7.30E-01 | EGA2-2 |
| ENSMMUG00000006799 | LOC709412    | Heat Shock Cognate 71 KDa Protein-like                             | 8.31  | 32.14  | 66.58  | 70.09  | 1.62 | 5.11E-12 | 1.18 | 1.07E-06 | 0.21  | 7.13E-01 | EGA2-2 |
| ENSMMUG00000009632 | ATP5L        | ATP Synthase, H+ Transporting, Mitochondrial Fo Complex Subunit G  | 8.71  | 24.72  | 56.60  | 50.42  | 1.39 | 3.47E-02 | 1.41 | 2.81E-02 | -0.31 | 8.47E-01 | EGA2-2 |
| ENSMMUG00000007037 | UPP1         | Uridine Phosphorylase 1                                            | 0.03  | 1.01   | 4.81   | 7.04   | 5.06 | 7.09E-06 | 2.50 | 2.17E-02 | 1.43  | 4.59E-01 | EGA2-2 |
| ENSMMUG00000040322 | CBX3         | Chromobox 3                                                        | 3.38  | 34.77  | 65.58  | 36.88  | 3.35 | 9.56E-10 | 1.27 | 3.86E-02 | -0.74 | 4.89E-01 | EGA2-2 |
| ENSMMUG00000045263 |              |                                                                    | 1.08  | 8.68   | 32.07  | 28.20  | 3.03 | 1.49E-04 | 2.47 | 1.24E-03 | -0.46 | 8.13E-01 | EGA2-2 |
| ENSMMUG00000011834 | THAP5        | THAP Domain Containing 5                                           | 0.70  | 3.52   | 9.37   | 7.64   | 2.43 | 1.53E-03 | 1.60 | 4.59E-02 | -0.07 | 9.82E-01 | EGA2-2 |
| ENSMMUG00000011892 | BASP1        | Brain Abundant Membrane Attached Signal Protein 1                  | 9.85  | 123.32 | 344.04 | 374.21 | 3.32 | 3.50E-06 | 1.84 | 1.62E-02 | -0.08 | 9.76E-01 | EGA2-2 |
| ENSMMUG00000037515 |              |                                                                    | 5.42  | 35.79  | 122.72 | 118.00 | 2.62 | 7.55E-05 | 2.36 | 3.62E-04 | -0.75 | 5.65E-01 | EGA2-2 |
| ENSMMUG00000029952 |              |                                                                    | 8.16  | 33.75  | 60.49  | 38.57  | 1.94 | 1.33E-05 | 1.04 | 2.96E-02 | -0.52 | 5.60E-01 | EGA2-2 |
| ENSMMUG00000001205 | TTC37        | Tetratricopeptide Repeat Domain 37                                 | 1.20  | 2.85   | 9.31   | 15.13  | 1.50 | 2.92E-02 | 1.85 | 4.66E-03 | 0.71  | 5.78E-01 | EGA2-2 |
| ENSMMUG00000005875 | HSPA9        | Heat Shock Protein Family A (Hsp70) Member 9                       | 14.73 | 106.27 | 245.95 | 178.91 | 2.49 | 9.93E-06 | 1.64 | 5.60E-03 | -0.63 | 5.78E-01 | EGA2-2 |
| ENSMMUG00000002398 |              |                                                                    | 18.78 | 70.81  | 167.99 | 113.27 | 1.97 | 2.45E-05 | 1.28 | 8.93E-03 | -0.34 | 7.61E-01 | EGA2-2 |
| ENSMMUG00000005563 | HAVCR1       | Hepatitis A Virus Cellular Receptor 1                              | 11.97 | 155.22 | 893.54 | #####  | 2.59 | 1.31E-03 | 3.61 | 3.03E-06 | -0.40 | 8.52E-01 | EGA2-2 |

|                    |              |                                                  |        |        |         |        |      |          |      |          |       |          |        |
|--------------------|--------------|--------------------------------------------------|--------|--------|---------|--------|------|----------|------|----------|-------|----------|--------|
| ENSMMUG00000028937 |              |                                                  | 43.95  | 163.16 | 297.65  | 274.65 | 2.01 | 5.29E-07 | 1.02 | 1.89E-02 | -0.25 | 8.12E-01 | EGA2-2 |
| ENSMMUG00000012521 | PANK3        | Pantothenate Kinase 3                            | 15.68  | 50.70  | 105.81  | 108.78 | 1.48 | 1.87E-04 | 0.94 | 2.35E-02 | 0.35  | 6.92E-01 | EGA2-2 |
| ENSMMUG00000003738 |              |                                                  | 183.64 | 917.38 | 1520.34 | 823.41 | 2.22 | 8.13E-13 | 0.85 | 1.29E-02 | -0.85 | 6.26E-02 | EGA2-2 |
| ENSMMUG00000014784 | DSP          | Desmoplakin                                      | 3.33   | 7.08   | 29.61   | 44.53  | 1.62 | 1.35E-02 | 1.68 | 8.79E-03 | 1.01  | 3.28E-01 | EGA2-2 |
| ENSMMUG00000022489 | LOC702174    | 40S Ribosomal Protein S15a Pseudogene            | 65.91  | 304.74 | 491.66  | 329.67 | 2.33 | 1.85E-13 | 0.71 | 4.81E-02 | -0.65 | 2.12E-01 | EGA2-2 |
| ENSMMUG00000041839 | LOC696808    | Histone H2B Type 1                               | 0.63   | 5.27   | 57.06   | 41.13  | 3.00 | 7.94E-03 | 3.29 | 2.38E-03 | 0.15  | 9.71E-01 | EGA2-2 |
| ENSMMUG00000046783 | HIST1H2BM    | Histone Cluster 1, H2bm                          | 0.11   | 28.05  | 51.88   | 40.69  | 3.86 | 1.04E-02 | 4.99 | 1.91E-04 | 0.73  | 8.39E-01 | EGA2-2 |
| ENSMMUG00000000267 | RPS10        | Ribosomal Protein S10                            | 35.40  | 163.66 | 297.76  | 197.33 | 2.24 | 4.82E-10 | 0.82 | 4.13E-02 | -0.23 | 8.12E-01 | EGA2-2 |
| ENSMMUG00000049181 | LOC106997918 | 60S Ribosomal Protein L39                        | 13.64  | 82.63  | 327.10  | 306.29 | 2.82 | 5.88E-06 | 2.52 | 5.25E-05 | -0.74 | 5.45E-01 | EGA2-2 |
| ENSMMUG00000015907 | RPL10A       | Ribosomal Protein L10a                           | 45.98  | 247.51 | 425.55  | 384.11 | 2.42 | 5.91E-12 | 1.03 | 7.24E-03 | -0.21 | 8.22E-01 | EGA2-2 |
| ENSMMUG00000001401 |              |                                                  | 4.73   | 14.45  | 30.17   | 17.54  | 1.36 | 7.17E-03 | 1.22 | 1.53E-02 | -0.27 | 8.34E-01 | EGA2-2 |
| ENSMMUG00000029598 | LOC712987    | 60S Ribosomal Protein L21-like                   | 60.30  | 143.29 | 408.29  | 268.46 | 1.18 | 1.37E-02 | 1.65 | 2.38E-04 | -0.49 | 5.84E-01 | EGA2-2 |
| ENSMMUG00000022201 |              |                                                  | 2.11   | 18.13  | 46.44   | 30.97  | 2.90 | 8.51E-07 | 1.75 | 4.76E-03 | -0.78 | 4.88E-01 | EGA2-2 |
| ENSMMUG00000016603 | LOC707834    | 60S Ribosomal Protein L19 Pseudogene             | 97.15  | 346.94 | 521.29  | 406.36 | 1.72 | 2.93E-09 | 0.66 | 4.01E-02 | -0.28 | 6.76E-01 | EGA2-2 |
| ENSMMUG00000029756 |              |                                                  | 111.80 | 268.68 | 667.07  | 412.62 | 1.25 | 1.54E-03 | 1.43 | 2.13E-04 | -0.91 | 1.03E-01 | EGA2-2 |
| ENSMMUG00000005362 | ADAT2        | Adenosine Deaminase, TRNA Specific 2             | 0.02   | 0.54   | 6.96    | 1.13   | 5.92 | 1.78E-04 | 4.12 | 7.34E-03 | -3.14 | 1.65E-01 | EGA2-2 |
| ENSMMUG00000013237 | RPS12        | Ribosomal Protein S12                            | 100.80 | 449.89 | 1012.31 | 931.16 | 2.10 | 2.18E-09 | 1.45 | 6.83E-05 | -0.16 | 8.80E-01 | EGA2-2 |
| ENSMMUG00000029417 | LOC716075    | 60S Ribosomal Protein L7 Pseudogene              | 25.03  | 79.26  | 191.27  | 129.55 | 1.73 | 2.92E-05 | 1.48 | 4.01E-04 | -0.72 | 2.92E-01 | EGA2-2 |
| ENSMMUG00000008939 | LOC693820    | 40S Ribosomal Protein S29                        | 18.75  | 125.13 | 304.32  | 267.04 | 2.43 | 4.82E-10 | 1.57 | 9.95E-05 | -0.48 | 5.36E-01 | EGA2-2 |
| ENSMMUG00000000012 |              |                                                  | 26.69  | 98.05  | 188.45  | 170.26 | 2.02 | 6.88E-08 | 1.15 | 3.72E-03 | -0.31 | 7.29E-01 | EGA2-2 |
| ENSMMUG00000001759 |              |                                                  | 38.33  | 150.07 | 398.13  | 381.23 | 1.86 | 1.07E-04 | 1.78 | 2.04E-04 | -0.43 | 6.87E-01 | EGA2-2 |
| ENSMMUG00000016844 | RPL4         | Ribosomal Protein L4                             | 21.99  | 103.71 | 172.04  | 161.55 | 2.25 | 1.55E-14 | 0.86 | 7.49E-03 | -0.42 | 4.59E-01 | EGA2-2 |
| ENSMMUG00000022717 | ANP32A       | Acidic Nuclear Phosphoprotein 32 Family Member A | 28.10  | 85.09  | 278.27  | 219.13 | 1.51 | 3.75E-02 | 1.78 | 1.04E-02 | -0.58 | 6.96E-01 | EGA2-2 |
| ENSMMUG00000002237 |              |                                                  | 19.24  | 49.52  | 173.05  | 190.12 | 1.46 | 6.76E-03 | 2.15 | 2.30E-05 | -0.24 | 8.63E-01 | EGA2-2 |
| ENSMMUG00000011327 | RPS17L       | Ribosomal Protein S17-like                       | 36.72  | 137.19 | 285.47  | 275.75 | 1.69 | 1.62E-04 | 1.56 | 5.24E-04 | -0.40 | 6.85E-01 | EGA2-2 |
| ENSMMUG00000041039 |              |                                                  | 0.02   | 3.40   | 7.03    | 3.53   | 4.23 | 2.96E-02 | 3.43 | 4.38E-02 | 0.55  | 9.12E-01 | EGA2-2 |
| ENSMMUG00000002531 | TOMM20       | Translocase Of Outer Mitochondrial Membrane 20   | 12.65  | 37.10  | 79.01   | 40.11  | 1.51 | 1.88E-02 | 1.46 | 2.17E-02 | -0.53 | 6.91E-01 | EGA2-2 |
| ENSMMUG00000045832 | RNASE9       | Ribonuclease A Family Member 9 (inactive)        | 0.01   | 0.88   | 8.31    | 1.30   | 6.69 | 2.17E-04 | 3.84 | 1.96E-02 | -3.64 | 1.20E-01 | EGA2-2 |
| ENSMMUG00000006463 | LOC706087    | 40S Ribosomal Protein S12                        | 84.84  | 380.04 | 861.99  | 824.50 | 2.10 | 9.20E-10 | 1.49 | 2.58E-05 | -0.15 | 8.81E-01 | EGA2-2 |
| ENSMMUG00000029420 | LOC714120    | 60S Ribosomal Protein L31 Pseudogene             | 36.01  | 81.77  | 227.00  | 170.47 | 1.51 | 2.73E-04 | 1.28 | 2.26E-03 | -0.52 | 5.07E-01 | EGA2-2 |
| ENSMMUG00000006983 |              |                                                  | 19.13  | 51.05  | 110.20  | 74.34  | 1.21 | 3.00E-02 | 1.27 | 1.95E-02 | -0.39 | 7.54E-01 | EGA2-2 |
| ENSMMUG00000004186 |              |                                                  | 7.22   | 27.22  | 65.91   | 56.45  | 1.93 | 6.24E-06 | 1.61 | 1.96E-04 | -0.49 | 5.63E-01 | EGA2-2 |
| ENSMMUG00000010333 |              |                                                  | 21.79  | 92.80  | 195.89  | 189.42 | 2.01 | 3.84E-06 | 1.29 | 4.67E-03 | -0.02 | 9.90E-01 | EGA2-2 |
| ENSMMUG00000029367 | RPS29        | Ribosomal Protein S29                            | 37.76  | 162.84 | 314.82  | 298.33 | 2.07 | 2.77E-07 | 1.21 | 4.28E-03 | -0.55 | 4.70E-01 | EGA2-2 |
| ENSMMUG00000029361 |              |                                                  | 0.25   | 12.50  | 38.33   | 20.82  | 4.97 | 2.61E-07 | 2.13 | 4.26E-02 | -1.08 | 5.85E-01 | EGA2-2 |
| ENSMMUG00000012179 |              |                                                  | 19.39  | 64.25  | 131.69  | 103.65 | 1.56 | 9.75E-04 | 1.35 | 4.81E-03 | -0.48 | 6.17E-01 | EGA2-2 |
| ENSMMUG00000029342 | LOC698377    | 60S Ribosomal Protein L21 Pseudogene             | 9.82   | 32.16  | 98.32   | 65.94  | 1.83 | 5.10E-04 | 1.65 | 1.87E-03 | -0.38 | 7.59E-01 | EGA2-2 |
| ENSMMUG00000023556 | SGPP1        | Sphingosine-1-phosphate Phosphatase 1            | 0.04   | 1.13   | 4.83    | 3.97   | 6.80 | 3.51E-10 | 2.31 | 2.47E-02 | -1.63 | 3.23E-01 | EGA2-2 |
| ENSMMUG00000029299 | LOC106999480 | 60S Ribosomal Protein L39                        | 8.01   | 52.87  | 186.21  | 177.74 | 2.89 | 5.60E-06 | 2.25 | 4.46E-04 | -0.61 | 6.58E-01 | EGA2-2 |
| ENSMMUG00000029256 | SLIRP        | SRA Stem-loop Interacting RNA Binding Protein    | 16.79  | 65.80  | 259.62  | 212.74 | 2.04 | 3.42E-03 | 2.18 | 1.36E-03 | -0.08 | 9.74E-01 | EGA2-2 |
| ENSMMUG00000013585 |              |                                                  | 4.91   | 18.64  | 44.60   | 33.56  | 1.88 | 4.75E-07 | 1.23 | 1.53E-03 | -0.29 | 7.51E-01 | EGA2-2 |
| ENSMMUG00000039581 |              |                                                  | 1.82   | 5.41   | 10.27   | 6.69   | 1.52 | 4.79E-02 | 1.63 | 2.75E-02 | -1.12 | 3.45E-01 | EGA2-2 |
| ENSMMUG00000018610 | PAPOLA       | Poly(A) Polymerase Alpha                         | 23.79  | 69.62  | 107.11  | 80.73  | 1.39 | 2.86E-06 | 0.72 | 2.56E-02 | -0.29 | 6.53E-01 | EGA2-2 |
| ENSMMUG00000045571 | RPL34        | Ribosomal Protein L34                            | 16.86  | 87.06  | 271.07  | 221.45 | 2.18 | 4.53E-03 | 1.89 | 1.43E-02 | -0.55 | 7.51E-01 | EGA2-2 |

|                    |              |                                                                             |        |        |         |        |      |          |      |          |       |          |        |
|--------------------|--------------|-----------------------------------------------------------------------------|--------|--------|---------|--------|------|----------|------|----------|-------|----------|--------|
| ENSMMUG00000043602 | PAGE2B       | PAGE Family Member 2B                                                       | 0.06   | 14.91  | 24.27   | 8.52   | 7.82 | 2.47E-08 | 2.64 | 2.97E-02 | -1.84 | 3.61E-01 | EGA2-2 |
| ENSMMUG00000045389 | LOC106995218 | Putative G Antigen Family E Member 3                                        | 0.04   | 19.69  | 61.56   | 17.65  | 7.85 | 5.86E-13 | 3.30 | 9.79E-04 | -0.87 | 7.01E-01 | EGA2-2 |
| ENSMMUG00000038296 | PAGE2B       | PAGE Family Member 2B                                                       | 0.13   | 26.19  | 51.05   | 22.11  | 7.61 | 1.66E-11 | 2.51 | 2.49E-02 | -1.09 | 6.32E-01 | EGA2-2 |
| ENSMMUG00000044833 | LOC703127    | P Antigen Family Member 5                                                   | 0.01   | 3.95   | 12.19   | 1.32   | 7.18 | 9.76E-06 | 2.93 | 4.69E-02 | -2.50 | 2.74E-01 | EGA2-2 |
| ENSMMUG00000045847 | LOC703363    | Putative G Antigen Family E Member 3                                        | 0.03   | 10.69  | 21.06   | 5.31   | 7.46 | 2.81E-09 | 2.65 | 1.63E-02 | -0.84 | 7.44E-01 | EGA2-2 |
| ENSMMUG00000032441 | LOC708140    | 40S Ribosomal Protein SA like                                               | 16.00  | 45.43  | 142.02  | 154.37 | 1.73 | 1.03E-04 | 1.87 | 2.22E-05 | 0.01  | 9.94E-01 | EGA2-2 |
| ENSMMUG00000010418 |              |                                                                             | 6.16   | 18.39  | 39.96   | 28.97  | 1.44 | 2.00E-03 | 1.39 | 2.50E-03 | -0.81 | 2.62E-01 | EGA2-2 |
| ENSMMUG00000010763 | BRWD3        | Bromodomain And WD Repeat Domain Containing 3                               | 10.88  | 24.29  | 80.81   | 58.90  | 1.16 | 3.90E-02 | 1.80 | 5.13E-04 | -0.47 | 6.79E-01 | EGA2-2 |
| ENSMMUG00000032410 |              |                                                                             | 180.85 | 897.34 | 1469.88 | 792.10 | 2.21 | 7.83E-13 | 0.84 | 1.40E-02 | -0.84 | 6.24E-02 | EGA2-2 |
| ENSMMUG00000001647 |              |                                                                             | 16.85  | 59.51  | 166.36  | 156.91 | 1.73 | 5.18E-04 | 1.99 | 4.54E-05 | -0.52 | 5.99E-01 | EGA2-2 |
| ENSMMUG00000006919 |              |                                                                             | 33.85  | 83.12  | 241.27  | 164.45 | 1.17 | 1.09E-02 | 1.79 | 3.49E-05 | -0.56 | 4.96E-01 | EGA2-2 |
| ENSMMUG00000018391 | RPL39        | Ribosomal Protein L39                                                       | 5.26   | 44.87  | 159.89  | 138.15 | 2.96 | 7.31E-06 | 2.73 | 3.89E-05 | -1.01 | 3.84E-01 | EGA2-2 |
| ENSMMUG00000038270 |              |                                                                             | 22.73  | 68.87  | 169.58  | 123.52 | 1.47 | 3.12E-04 | 1.51 | 1.87E-04 | -0.55 | 4.59E-01 | EGA2-2 |
| ENSMMUG00000032342 | LOC707204    | 40S Ribosomal Protein S13 Pseudogene                                        | 33.68  | 126.65 | 260.54  | 170.96 | 1.61 | 4.63E-05 | 1.35 | 8.15E-04 | -0.84 | 1.58E-01 | EGA2-2 |
| ENSMMUG00000012742 | SLC6A8       | Solute Carrier Family 6 Member 8                                            | 0.99   | 19.08  | 58.36   | 46.71  | 4.20 | 1.12E-05 | 2.32 | 2.38E-02 | -0.76 | 7.37E-01 | EGA2-2 |
| ENSMMUG00000015144 | DLC1         | DLC1 Rho GTPase Activating Protein                                          | 0.01   | 0.91   | 6.73    | 8.74   | 6.44 | 6.53E-10 | 3.65 | 3.90E-04 | 0.33  | 9.17E-01 | EGA2-2 |
| ENSMMUG00000015347 | PRKDC        | Protein Kinase, DNA-activated, Catalytic Polypeptide                        | 8.74   | 22.05  | 47.75   | 64.51  | 1.35 | 5.37E-03 | 1.19 | 1.49E-02 | 0.66  | 4.27E-01 | EGA2-2 |
| ENSMMUG00000021314 | LOC695327    | 40S Ribosomal Protein S20-like                                              | 79.67  | 433.65 | 894.33  | 633.34 | 2.38 | 1.79E-11 | 1.27 | 7.79E-04 | -0.48 | 4.90E-01 | EGA2-2 |
| ENSMMUG00000028967 | LOC695340    | 60S Ribosomal Protein L19 Pseudogene                                        | 85.49  | 322.92 | 474.52  | 387.78 | 1.82 | 5.51E-12 | 0.68 | 1.93E-02 | -0.28 | 6.22E-01 | EGA2-2 |
| ENSMMUG00000005141 | RPL7         | Ribosomal Protein L7                                                        | 71.22  | 220.37 | 549.66  | 367.67 | 1.71 | 1.60E-05 | 1.53 | 1.31E-04 | -0.74 | 2.47E-01 | EGA2-2 |
| ENSMMUG00000013907 |              |                                                                             | 16.74  | 62.72  | 210.75  | 125.78 | 1.81 | 3.88E-05 | 1.95 | 8.52E-06 | -0.80 | 2.60E-01 | EGA2-2 |
| ENSMMUG00000017786 | PABPC1       | Poly(A) Binding Protein Cytoplasmic 1                                       | 132.47 | 218.06 | 490.02  | 562.58 | 0.59 | 5.80E-03 | 1.35 | 8.30E-12 | 0.12  | 8.26E-01 | EGA2-2 |
| ENSMMUG00000006489 | YWHAZ        | Tyrosine 3-monooxygenase/tryptophan 5-monooxygenase Activation Protein Zeta | 17.30  | 66.61  | 188.25  | 284.06 | 1.85 | 6.97E-03 | 1.57 | 2.32E-02 | 0.68  | 6.07E-01 | EGA2-2 |
| ENSMMUG00000011359 | EIF3E        | Eukaryotic Translation Initiation Factor 3 Subunit E                        | 7.87   | 22.16  | 42.33   | 50.85  | 1.35 | 2.62E-02 | 1.48 | 1.21E-02 | -0.11 | 9.61E-01 | EGA2-2 |
| ENSMMUG00000041293 |              |                                                                             | 8.13   | 28.54  | 69.22   | 65.74  | 2.12 | 9.55E-09 | 1.40 | 2.46E-04 | -0.15 | 8.96E-01 | EGA2-2 |
| ENSMMUG00000022933 | TOP1MT       | DNA Topoisomerase I Mitochondrial                                           | 0.09   | 2.51   | 14.68   | 20.67  | 3.90 | 6.09E-06 | 3.77 | 8.67E-06 | 0.74  | 7.01E-01 | EGA2-2 |
| ENSMMUG00000001645 | EEF1D        | Eukaryotic Translation Elongation Factor 1 Delta                            | 2.73   | 11.00  | 20.98   | 20.06  | 1.76 | 3.53E-06 | 1.27 | 1.18E-03 | -0.36 | 6.70E-01 | EGA2-2 |
| ENSMMUG00000002663 | FOXH1        | Forkhead Box H1                                                             | 0.03   | 0.46   | 3.29    | 7.57   | 4.80 | 1.79E-04 | 2.79 | 2.69E-02 | 1.45  | 5.28E-01 | EGA2-2 |
| ENSMMUG00000019282 |              |                                                                             | 10.40  | 34.40  | 77.51   | 54.24  | 1.86 | 4.16E-05 | 1.37 | 3.62E-03 | -0.57 | 5.07E-01 | EGA2-2 |
| ENSMMUG00000032104 | LOC107000401 | 60S Ribosomal Protein L39                                                   | 6.96   | 43.34  | 165.99  | 152.10 | 2.53 | 9.41E-05 | 2.63 | 3.42E-05 | -0.94 | 4.10E-01 | EGA2-2 |
| ENSMMUG00000008584 | SLCO1A2      | Solute Carrier Organic Anion Transporter Family Member 1A2                  | 0.00   | 0.02   | 1.46    | 2.87   | 2.79 | 4.88E-02 | 6.93 | 3.18E-11 | 1.15  | 5.90E-01 | EGA2-2 |
| ENSMMUG00000015381 | KRAS         | KRAS Proto-oncogene, GTPase                                                 | 1.41   | 11.79  | 31.79   | 10.46  | 2.36 | 8.70E-03 | 1.84 | 4.49E-02 | -1.10 | 4.89E-01 | EGA2-2 |
| ENSMMUG00000006154 | TWF1         | Twinfilin Actin Binding Protein 1                                           | 1.24   | 7.08   | 15.87   | 27.13  | 2.18 | 9.65E-03 | 1.86 | 2.79E-02 | 0.29  | 9.05E-01 | EGA2-2 |
| ENSMMUG00000043327 |              |                                                                             | 0.97   | 30.04  | 120.15  | 137.46 | 4.89 | 4.81E-08 | 2.63 | 5.27E-03 | -0.51 | 8.32E-01 | EGA2-2 |
| ENSMMUG00000031770 | LOC717674    | 60S Ribosomal Protein L32 Pseudogene                                        | 9.91   | 43.40  | 127.36  | 87.61  | 2.27 | 4.47E-07 | 1.77 | 1.08E-04 | -0.54 | 5.42E-01 | EGA2-2 |
| ENSMMUG00000031717 | LOC693645    | 60S Ribosomal Protein L36a                                                  | 53.20  | 209.12 | 438.89  | 303.42 | 2.01 | 1.84E-06 | 1.10 | 1.41E-02 | -0.31 | 7.59E-01 | EGA2-2 |

|                    |           |                                                         |        |        |         |        |      |          |      |          |       |          |        |
|--------------------|-----------|---------------------------------------------------------|--------|--------|---------|--------|------|----------|------|----------|-------|----------|--------|
| ENSMMUG00000031711 | LOC694937 | 60S Ribosomal Protein L31 Pseudogene                    | 125.28 | 269.48 | 1140.24 | 548.41 | 1.22 | 2.55E-02 | 1.33 | 1.20E-02 | -0.83 | 3.30E-01 | EGA2-2 |
| ENSMMUG00000006383 |           |                                                         | 58.28  | 182.01 | 407.76  | 277.11 | 1.55 | 3.94E-05 | 1.17 | 2.73E-03 | -0.52 | 4.47E-01 | EGA2-2 |
| ENSMMUG00000004504 | KITLG     | KIT Ligand                                              | 0.03   | 10.74  | 20.97   | 4.96   | 7.41 | 1.14E-14 | 2.18 | 3.94E-02 | -1.17 | 5.51E-01 | EGA2-2 |
| ENSMMUG00000044430 |           |                                                         | 11.58  | 33.25  | 83.77   | 53.63  | 1.65 | 7.32E-04 | 1.38 | 5.04E-03 | -0.67 | 4.36E-01 | EGA2-2 |
| ENSMMUG00000016804 | NUDT4     | Nudix Hydrolase 4                                       | 8.82   | 81.78  | 164.39  | 131.19 | 2.78 | 1.94E-06 | 1.53 | 1.42E-02 | -0.30 | 8.53E-01 | EGA2-2 |
| ENSMMUG00000047411 |           |                                                         | 101.50 | 164.87 | 370.52  | 416.61 | 0.52 | 2.92E-02 | 1.42 | 3.07E-11 | 0.07  | 9.20E-01 | EGA2-2 |
| ENSMMUG00000002029 |           |                                                         | 28.70  | 112.52 | 280.04  | 221.66 | 1.89 | 2.07E-05 | 1.34 | 3.53E-03 | -0.15 | 9.15E-01 | EGA2-2 |
| ENSMMUG00000039321 | LOC700257 | 40S Ribosomal Protein S12 Pseudogene                    | 42.25  | 185.13 | 437.68  | 400.97 | 2.08 | 6.33E-09 | 1.46 | 8.40E-05 | -0.07 | 9.62E-01 | EGA2-2 |
| ENSMMUG00000049195 | LOC710331 | 40S Ribosomal Protein S12 Pseudogene                    | 14.32  | 66.84  | 128.23  | 104.85 | 1.99 | 1.70E-05 | 1.21 | 1.30E-02 | -0.47 | 6.28E-01 | EGA2-2 |
| ENSMMUG00000013446 | LOC694628 | Annexin A8                                              | 0.10   | 4.03   | 91.32   | 189.21 | 4.56 | 5.41E-06 | 5.41 | 2.66E-08 | 0.82  | 7.19E-01 | EGA2-2 |
| ENSMMUG00000045511 |           |                                                         | 32.02  | 70.43  | 212.53  | 151.99 | 0.99 | 3.56E-02 | 1.83 | 2.17E-05 | -0.33 | 7.45E-01 | EGA2-2 |
| ENSMMUG00000018572 | GHITM     | Growth Hormone Inducible Transmembrane Protein          | 26.83  | 65.10  | 178.82  | 125.84 | 1.12 | 4.28E-02 | 1.87 | 2.26E-04 | -0.95 | 2.33E-01 | EGA2-2 |
| ENSMMUG00000030562 | RPS24     | Ribosomal Protein S24                                   | 16.15  | 84.06  | 148.61  | 83.21  | 2.28 | 3.03E-14 | 0.99 | 2.39E-03 | -0.82 | 6.65E-02 | EGA2-2 |
| ENSMMUG00000008691 | VDAC2     | Voltage Dependent Anion Channel 2                       | 6.03   | 41.96  | 130.90  | 85.52  | 2.69 | 5.52E-06 | 1.50 | 1.74E-02 | -0.28 | 8.66E-01 | EGA2-2 |
| ENSMMUG00000023198 | TET1      | Tet Methylcytosine Dioxygenase 1                        | 0.41   | 16.51  | 73.16   | 81.87  | 4.91 | 1.31E-14 | 2.66 | 7.22E-05 | -0.37 | 8.34E-01 | EGA2-2 |
| ENSMMUG00000019825 | UBE2D1    | Ubiquitin Conjugating Enzyme E2 D1                      | 1.75   | 8.48   | 21.40   | 22.30  | 2.18 | 4.03E-03 | 1.85 | 1.53E-02 | -0.23 | 9.17E-01 | EGA2-2 |
| ENSMMUG00000009079 |           |                                                         | 3.15   | 14.50  | 55.68   | 58.81  | 2.01 | 7.17E-04 | 2.34 | 5.28E-05 | -0.17 | 9.31E-01 | EGA2-2 |
| ENSMMUG00000015334 | GSTO1     | Glutathione S-transferase Omega 1                       | 0.38   | 1.50   | 9.85    | 6.16   | 2.84 | 3.18E-02 | 3.27 | 9.66E-03 | -2.37 | 2.09E-01 | EGA2-2 |
| ENSMMUG00000000558 |           |                                                         | 83.20  | 375.28 | 650.38  | 675.35 | 2.11 | 2.66E-07 | 0.94 | 3.74E-02 | 0.00  | 9.99E-01 | EGA2-2 |
| ENSMMUG00000008994 | EIF3A     | Eukaryotic Translation Initiation Factor 3 Subunit A    | 16.61  | 112.05 | 175.27  | 155.39 | 2.62 | 7.46E-13 | 0.91 | 2.58E-02 | -0.26 | 7.91E-01 | EGA2-2 |
| ENSMMUG00000009594 | FGFR2     | Fibroblast Growth Factor Receptor 2                     | 0.26   | 2.68   | 44.60   | 23.31  | 2.61 | 6.17E-03 | 4.59 | 2.21E-07 | -0.92 | 6.26E-01 | EGA2-2 |
| ENSMMUG00000046340 |           |                                                         | 0.17   | 2.05   | 13.74   | 5.77   | 5.03 | 3.88E-03 | 3.86 | 9.07E-03 | 0.34  | 9.48E-01 | EGA2-2 |
| ENSMMUG00000022445 | BNIP3     | BCL2 Interacting Protein 3                              | 41.56  | 79.46  | 228.13  | 166.67 | 1.02 | 2.10E-02 | 1.53 | 2.35E-04 | -0.84 | 1.83E-01 | EGA2-2 |
| ENSMMUG00000042113 | LOC704588 | 60S Ribosomal Protein L31 Pseudogene                    | 208.08 | 393.24 | 1956.25 | 886.04 | 1.15 | 4.68E-02 | 1.42 | 9.69E-03 | -0.88 | 3.12E-01 | EGA2-2 |
| ENSMMUG00000021273 |           |                                                         | 5.76   | 19.56  | 42.97   | 39.00  | 1.48 | 2.78E-02 | 1.42 | 3.17E-02 | -0.33 | 8.42E-01 | EGA2-2 |
| ENSMMUG00000022547 | RPS13     | Ribosomal Protein S13                                   | 95.33  | 382.84 | 786.94  | 550.72 | 1.81 | 1.27E-07 | 1.31 | 2.11E-04 | -0.82 | 1.06E-01 | EGA2-2 |
| ENSMMUG00000016446 | PSMA1     | Proteasome Subunit Alpha 1                              | 0.59   | 3.63   | 16.79   | 19.97  | 1.74 | 4.60E-02 | 2.98 | 1.78E-04 | 0.75  | 6.59E-01 | EGA2-2 |
| ENSMMUG00000038913 |           |                                                         | 2.51   | 9.33   | 38.06   | 32.45  | 1.95 | 1.06E-02 | 2.09 | 3.74E-03 | -0.33 | 8.69E-01 | EGA2-2 |
| ENSMMUG00000010455 | FOLR1     | Folate Receptor 1                                       | 0.13   | 4.37   | 26.07   | 73.06  | 3.45 | 1.77E-03 | 3.66 | 5.78E-04 | 1.64  | 3.63E-01 | EGA2-2 |
| ENSMMUG00000046225 |           |                                                         | 3.40   | 9.76   | 23.40   | 11.48  | 1.50 | 2.77E-02 | 1.59 | 1.58E-02 | -0.35 | 8.30E-01 | EGA2-2 |
| ENSMMUG00000030947 |           |                                                         | 41.19  | 163.91 | 333.52  | 225.05 | 1.68 | 1.25E-05 | 1.29 | 1.06E-03 | -0.91 | 1.03E-01 | EGA2-2 |
| ENSMMUG00000014792 | FAM76B    | Family With Sequence Similarity 76 Member B             | 0.33   | 2.18   | 4.88    | 5.47   | 2.34 | 5.54E-03 | 2.06 | 1.43E-02 | 1.25  | 3.61E-01 | EGA2-2 |
| ENSMMUG00000017568 | DLAT      | Dihydrolipoamide S-acetyltransferase                    | 9.68   | 24.38  | 70.33   | 71.61  | 1.19 | 4.03E-02 | 1.50 | 6.88E-03 | -0.04 | 9.84E-01 | EGA2-2 |
| ENSMMUG00000043558 | TIMM8B    | Translocase Of Inner Mitochondrial Membrane 8 Homolog B | 1.52   | 15.84  | 41.08   | 32.45  | 2.73 | 1.97E-03 | 2.05 | 2.27E-02 | -0.31 | 9.04E-01 | EGA2-2 |
| ENSMMUG00000045160 |           |                                                         | 0.43   | 2.70   | 9.41    | 5.61   | 2.47 | 1.44E-03 | 2.29 | 3.09E-03 | -1.19 | 3.56E-01 | EGA2-2 |
| ENSMMUG00000018651 | DDX6      | DEAD-box Helicase 6                                     | 10.62  | 24.60  | 66.44   | 66.97  | 1.11 | 1.56E-03 | 1.29 | 1.55E-04 | 0.13  | 8.98E-01 | EGA2-2 |
| ENSMMUG0000004696  | HSPA8     | Heat Shock Protein Family A (Hsp70) Member 8            | 34.24  | 136.25 | 255.77  | 292.96 | 1.67 | 7.85E-11 | 1.11 | 3.71E-05 | 0.30  | 5.85E-01 | EGA2-2 |
| ENSMMUG00000010691 | LOC706496 | Ribosomal Protein L9-like                               | 31.19  | 98.21  | 258.83  | 222.68 | 1.38 | 2.27E-05 | 1.84 | 9.29E-09 | -0.31 | 6.64E-01 | EGA2-2 |
| ENSMMUG00000010730 |           |                                                         | 23.75  | 81.49  | 280.00  | 219.56 | 1.65 | 1.74E-03 | 1.99 | 9.62E-05 | -0.22 | 8.79E-01 | EGA2-2 |
| ENSMMUG00000008387 | DPP4      | Dipeptidyl Peptidase 4                                  | 0.19   | 21.77  | 151.19  | 335.59 | 6.65 | 5.64E-13 | 3.35 | 6.16E-04 | 0.50  | 8.48E-01 | EGA2-2 |
| ENSMMUG00000031424 | LOC702713 | 40S Ribosomal Protein S20 Pseudogene                    | 25.24  | 132.14 | 279.01  | 228.14 | 2.33 | 1.22E-11 | 1.42 | 7.20E-05 | -0.39 | 5.89E-01 | EGA2-2 |
| ENSMMUG00000031367 |           |                                                         | 27.72  | 104.27 | 242.11  | 204.80 | 1.77 | 2.78E-04 | 1.57 | 1.37E-03 | -0.32 | 7.91E-01 | EGA2-2 |

|                      |              |                                                                                    |        |        |         |        |      |          |      |          |       |          |        |
|----------------------|--------------|------------------------------------------------------------------------------------|--------|--------|---------|--------|------|----------|------|----------|-------|----------|--------|
| ENSMMUG00000001054   | EEF1B2       | Eukaryotic Translation Elongation Factor 1 Beta 2                                  | 40.30  | 127.57 | 246.66  | 239.51 | 1.77 | 1.31E-03 | 1.17 | 4.27E-02 | -0.31 | 8.21E-01 | EGA2-2 |
| ENSMMUG00000004941   |              |                                                                                    | 16.18  | 44.56  | 128.13  | 139.12 | 1.72 | 2.62E-04 | 1.58 | 8.14E-04 | 0.00  | 9.99E-01 | EGA2-2 |
| ENSMMUG000000012318  | ATIC         | 5-aminoimidazole-4-carboxamide Ribonucleotide Formyltransferase/IMP Cyclohydrolase | 30.70  | 55.27  | 101.90  | 187.13 | 1.02 | 4.04E-02 | 1.06 | 2.81E-02 | 0.73  | 3.45E-01 | EGA2-2 |
| ENSMMUG00000001927   | XRCC5        | X-ray Repair Cross Complementing 5                                                 | 12.59  | 47.75  | 126.92  | 70.83  | 1.90 | 2.32E-03 | 1.75 | 5.10E-03 | -0.72 | 5.36E-01 | EGA2-2 |
| ENSMMUG000000019544  | RPL37A       | Ribosomal Protein L37a                                                             | 26.16  | 126.52 | 308.14  | 256.41 | 1.81 | 2.20E-05 | 2.09 | 7.40E-07 | -0.67 | 3.67E-01 | EGA2-2 |
| ENSMMUG00000007685   | FARSB        | Phenylalanyl-tRNA Synthetase Beta Subunit                                          | 6.16   | 17.45  | 36.13   | 37.27  | 1.25 | 4.13E-02 | 1.65 | 4.32E-03 | -0.80 | 4.27E-01 | EGA2-2 |
| ENSMMUG000000043595  | LOC100429752 | 60S Ribosomal Protein L39 Pseudogene                                               | 7.03   | 31.60  | 165.59  | 144.91 | 2.18 | 1.20E-03 | 2.87 | 7.18E-06 | -0.87 | 4.68E-01 | EGA2-2 |
| ENSMMUG000000037583  |              |                                                                                    | 1.96   | 10.15  | 19.40   | 17.80  | 2.39 | 9.35E-09 | 0.99 | 2.93E-02 | 0.09  | 9.56E-01 | EGA2-2 |
| ENSMMUG000000005217  | HSPA5        | Heat Shock Protein Family A (Hsp70) Member 5                                       | 19.67  | 83.33  | 174.95  | 102.04 | 1.49 | 1.45E-02 | 1.60 | 6.74E-03 | -0.99 | 2.89E-01 | EGA2-2 |
| ENSMMUG000000023255  | CDK5RAP2     | CDK5 Regulatory Subunit Associated Protein 2                                       | 0.90   | 5.68   | 21.12   | 8.29   | 2.80 | 1.68E-04 | 1.86 | 1.67E-02 | -1.40 | 2.31E-01 | EGA2-2 |
| ENSMMUG000000006088  | KLF4         | Kruppel Like Factor 4                                                              | 1.13   | 4.90   | 48.46   | 28.68  | 1.45 | 2.00E-02 | 3.80 | 1.17E-11 | -1.29 | 1.31E-01 | EGA2-2 |
| ENSMMUG000000043473  | LOC100423218 | 60S Ribosomal Protein L19 Pseudogene                                               | 108.99 | 383.93 | 603.23  | 498.79 | 1.72 | 2.48E-09 | 0.78 | 1.34E-02 | -0.28 | 6.73E-01 | EGA2-2 |
| ENSMMUG0000000031768 |              |                                                                                    | 22.79  | 78.86  | 224.72  | 204.17 | 1.70 | 4.87E-04 | 1.86 | 1.04E-04 | -0.35 | 7.64E-01 | EGA2-2 |
| ENSMMUG000000016632  |              |                                                                                    | 6.99   | 30.94  | 99.40   | 57.90  | 2.19 | 1.53E-05 | 1.89 | 2.25E-04 | -0.82 | 3.45E-01 | EGA2-2 |
| ENSMMUG000000002920  |              |                                                                                    | 36.63  | 143.70 | 379.51  | 304.35 | 1.91 | 2.77E-05 | 1.43 | 2.36E-03 | -0.07 | 9.67E-01 | EGA2-2 |
| ENSMMUG000000011868  | PSAT1        | Phosphoserine Aminotransferase 1                                                   | 0.09   | 1.53   | 21.19   | 9.33   | 3.28 | 6.53E-03 | 4.34 | 1.40E-04 | -2.30 | 1.91E-01 | EGA2-2 |
| ENSMMUG000000017609  | CTSL         | Cathepsin L                                                                        | 0.26   | 1.42   | 32.04   | 50.85  | 2.77 | 1.62E-03 | 4.64 | 1.65E-08 | 1.42  | 3.11E-01 | EGA2-2 |
| ENSMMUG000000047234  | LOC695327    | 40S Ribosomal Protein S20-like                                                     | 85.23  | 470.23 | 968.52  | 715.15 | 2.36 | 9.73E-12 | 1.34 | 2.35E-04 | -0.50 | 4.47E-01 | EGA2-2 |
| ENSMMUG000000022971  | CTSV         | Cathepsin V                                                                        | 0.58   | 6.99   | 33.59   | 18.66  | 3.57 | 1.21E-07 | 2.83 | 3.85E-05 | -1.42 | 1.78E-01 | EGA2-2 |
| ENSMMUG000000011870  | RPS7         | Ribosomal Protein S7                                                               | 36.09  | 119.27 | 206.16  | 151.15 | 1.66 | 3.61E-07 | 0.92 | 8.59E-03 | -0.48 | 4.21E-01 | EGA2-2 |
| ENSMMUG000000016678  | ROCK2        | Rho Associated Coiled-coil Containing Protein Kinase 2                             | 2.05   | 11.92  | 41.71   | 33.18  | 2.58 | 1.31E-04 | 1.96 | 4.66E-03 | -0.54 | 7.25E-01 | EGA2-2 |
| ENSMMUG000000018060  |              |                                                                                    | 7.54   | 32.48  | 77.75   | 84.13  | 2.17 | 2.34E-04 | 1.72 | 4.21E-03 | -0.09 | 9.69E-01 | EGA2-2 |
| ENSMMUG000000008248  | LOC106995591 | Aldose 1-epimerase-like                                                            | 0.05   | 1.93   | 6.57    | 12.31  | 4.10 | 8.87E-04 | 2.70 | 1.91E-02 | 2.16  | 2.15E-01 | EGA2-2 |
| ENSMMUG000000005253  |              |                                                                                    | 32.89  | 124.62 | 335.03  | 275.04 | 1.84 | 6.44E-06 | 1.47 | 4.32E-04 | -0.11 | 9.36E-01 | EGA2-2 |
| ENSMMUG000000019841  | LRPPRC       | Leucine Rich Pentatricopeptide Repeat Containing                                   | 5.05   | 32.31  | 97.71   | 88.41  | 2.55 | 2.37E-06 | 1.62 | 4.24E-03 | 0.12  | 9.51E-01 | EGA2-2 |
| ENSMMUG000000012390  | EPCAM        | Epithelial Cell Adhesion Molecule                                                  | 2.92   | 12.94  | 68.84   | 95.98  | 2.10 | 1.09E-02 | 2.10 | 9.82E-03 | 0.91  | 5.53E-01 | EGA2-2 |
| ENSMMUG000000008104  | PSME4        | Proteasome Activator Subunit 4                                                     | 3.61   | 25.62  | 77.25   | 60.09  | 2.46 | 4.38E-05 | 1.85 | 2.88E-03 | -0.62 | 6.19E-01 | EGA2-2 |
| ENSMMUG000000015563  | RPS27A       | Ribosomal Protein S27a                                                             | 36.83  | 174.41 | 530.08  | 330.06 | 2.12 | 1.76E-07 | 1.96 | 1.78E-06 | -0.71 | 3.05E-01 | EGA2-2 |
| ENSMMUG000000019075  | LOC718926    | Putative Prolyl-tRNA Synthetase Associated Domain-containing Protein 1             | 0.03   | 0.61   | 6.27    | 1.25   | 6.05 | 2.33E-04 | 3.61 | 1.28E-02 | -1.97 | 4.46E-01 | EGA2-2 |
| ENSMMUG000000006503  | AFTPH        | Aftiphilin                                                                         | 1.45   | 5.42   | 11.52   | 4.90   | 1.63 | 1.36E-02 | 1.46 | 2.68E-02 | -0.92 | 4.07E-01 | EGA2-2 |
| ENSMMUG000000002090  | ATP6V1B1     | ATPase H+ Transporting V1 Subunit B1                                               | 0.01   | 0.32   | 6.34    | 38.12  | 3.27 | 3.71E-02 | 3.52 | 8.98E-03 | 2.44  | 2.27E-01 | EGA2-2 |
| ENSMMUG000000011845  | HK2          | Hexokinase 2                                                                       | 0.57   | 28.61  | 93.92   | 94.59  | 6.12 | 1.37E-21 | 1.88 | 8.75E-03 | 0.13  | 9.60E-01 | EGA2-2 |
| ENSMMUG000000018977  | CKB          | Creatine Kinase, Brain                                                             | 6.58   | 21.59  | 73.55   | 75.86  | 1.49 | 4.69E-02 | 1.83 | 1.07E-02 | -0.25 | 9.05E-01 | EGA2-2 |
| ENSMMUG000000021281  | LOC709650    | 60S Ribosomal Protein L36a-like                                                    | 48.01  | 183.25 | 422.88  | 295.67 | 1.91 | 8.42E-06 | 1.34 | 2.70E-03 | -0.38 | 6.96E-01 | EGA2-2 |
| ENSMMUG000000009873  | RPL31        | Ribosomal Protein L31                                                              | 160.74 | 380.97 | 1556.60 | 762.91 | 1.23 | 2.44E-02 | 1.47 | 4.95E-03 | -0.77 | 3.82E-01 | EGA2-2 |
| ENSMMUG000000045362  |              |                                                                                    | 8.83   | 50.74  | 108.06  | 81.45  | 2.47 | 1.66E-11 | 1.23 | 1.69E-03 | -0.32 | 7.13E-01 | EGA2-2 |
| ENSMMUG000000041748  | LOC699695    | 60S Ribosomal Protein L17 Pseudogene                                               | 15.04  | 51.99  | 129.18  | 111.30 | 1.89 | 4.79E-04 | 1.65 | 2.64E-03 | -0.64 | 5.32E-01 | EGA2-2 |

|                     |           |                                                           |        |        |         |        |      |          |      |          |       |          |        |
|---------------------|-----------|-----------------------------------------------------------|--------|--------|---------|--------|------|----------|------|----------|-------|----------|--------|
| ENSMMUG00000040977  | LOC706340 | 60S Ribosomal Protein L31 Pseudogene                      | 138.14 | 323.18 | 1322.89 | 628.19 | 1.29 | 8.04E-03 | 1.55 | 9.65E-04 | -1.04 | 1.29E-01 | EGA2-2 |
| ENSMMUG00000030680  | LOC701250 | Ribosomal Protein L7-like                                 | 59.61  | 179.85 | 440.45  | 296.08 | 1.69 | 2.23E-05 | 1.45 | 3.12E-04 | -0.67 | 3.18E-01 | EGA2-2 |
| ENSMMUG00000004807  |           |                                                           | 7.69   | 31.64  | 113.42  | 70.07  | 1.92 | 4.67E-06 | 2.28 | 3.47E-08 | -0.83 | 2.11E-01 | EGA2-2 |
| ENSMMUG00000013531  | IPO5      | Importin 5                                                | 5.98   | 13.31  | 25.60   | 30.89  | 1.15 | 8.24E-04 | 0.96 | 5.92E-03 | 0.20  | 8.19E-01 | EGA2-2 |
| ENSMMUG00000009790  | LAMP1     | Lysosomal Associated Membrane Protein 1                   | 16.45  | 32.45  | 83.25   | 74.68  | 1.14 | 2.35E-03 | 1.07 | 4.29E-03 | -0.01 | 9.97E-01 | EGA2-2 |
| ENSMMUG00000021297  |           |                                                           | 0.00   | 0.87   | 5.02    | 2.83   | 4.66 | 1.93E-02 | 3.72 | 3.84E-02 | 0.31  | 9.64E-01 | EGA2-2 |
| ENSMMUG00000007560  | PRELID3B  | PRELI Domain Containing 3B                                | 19.89  | 47.24  | 103.28  | 92.29  | 1.07 | 4.35E-02 | 1.27 | 1.22E-02 | -0.21 | 8.78E-01 | EGA2-2 |
| ENSMMUG00000044031  |           |                                                           | 26.62  | 111.38 | 299.14  | 247.35 | 1.73 | 8.55E-05 | 2.09 | 1.39E-06 | -0.56 | 5.02E-01 | EGA2-2 |
| ENSMMUG00000016306  | AHCY      | Adenosylhomocysteinase                                    | 2.63   | 9.84   | 36.09   | 33.91  | 2.35 | 7.88E-04 | 1.82 | 1.12E-02 | -0.23 | 9.14E-01 | EGA2-2 |
| ENSMMUG00000015993  | SIRPB2    | Signal Regulatory Protein Beta 2                          | 0.41   | 1.16   | 2.32    | 1.76   | 1.33 | 1.34E-02 | 1.18 | 2.72E-02 | -0.28 | 8.30E-01 | EGA2-2 |
| ENSMMUG00000031128  | POTEH     | POTE Ankyrin Domain Family Member H                       | 0.02   | 0.18   | 1.36    | 0.70   | 4.17 | 4.88E-03 | 2.87 | 2.29E-02 | -0.93 | 7.47E-01 | EGA2-2 |
| ENSMMUG00000009106  | MIF       | Macrophage Migration Inhibitory Factor                    | 0.46   | 2.03   | 5.20    | 9.25   | 3.25 | 8.37E-04 | 2.07 | 4.14E-02 | 0.46  | 8.60E-01 | EGA2-2 |
| ENSMMUG00000020994  | SUSD2     | Sushi Domain Containing 2                                 | 0.02   | 0.48   | 4.53    | 8.33   | 3.12 | 3.03E-02 | 3.33 | 1.31E-02 | 0.32  | 9.45E-01 | EGA2-2 |
| ENSMMUG00000007221  | HMOX1     | Heme Oxygenase 1                                          | 1.34   | 23.63  | 100.03  | 120.93 | 3.03 | 9.49E-05 | 3.32 | 1.39E-05 | -0.80 | 6.17E-01 | EGA2-2 |
| ENSMMUG00000006101  | MYH9      | Myosin Heavy Chain 9                                      | 2.18   | 7.81   | 24.02   | 49.90  | 2.01 | 8.85E-03 | 1.66 | 3.28E-02 | 1.02  | 4.34E-01 | EGA2-2 |
| ENSMMUG00000012754  | EIF3D     | Eukaryotic Translation Initiation Factor 3 Subunit D      | 3.77   | 16.54  | 41.14   | 36.23  | 2.17 | 4.48E-04 | 1.33 | 4.20E-02 | -0.45 | 7.58E-01 | EGA2-2 |
| ENSMMUG00000001016  | APOBEC3H  | Apolipoprotein B mRNA Editing Enzyme Catalytic Subunit 3H | 0.01   | 0.84   | 6.77    | 13.47  | 4.01 | 1.84E-02 | 5.30 | 3.22E-04 | -1.90 | 4.77E-01 | EGA2-2 |
| ENSMMUG000000019118 | ST13      | ST13, Hsp70 Interacting Protein                           | 32.35  | 62.74  | 105.02  | 115.51 | 1.01 | 4.09E-02 | 0.97 | 4.70E-02 | 0.03  | 9.87E-01 | EGA2-2 |
| ENSMMUG00000031005  | RPL39     | Ribosomal Protein L39                                     | 13.88  | 83.66  | 329.13  | 308.89 | 2.79 | 1.01E-05 | 2.52 | 6.57E-05 | -0.76 | 5.37E-01 | EGA2-2 |
| ENSMMUG00000031002  | LOC716593 | 60S Ribosomal Protein L34 Pseudogene                      | 9.70   | 52.18  | 173.35  | 136.38 | 2.30 | 1.73E-03 | 1.97 | 7.62E-03 | -0.61 | 7.04E-01 | EGA2-2 |
| ENSMMUG00000017518  | SRR       | Serine Racemase                                           | 0.33   | 1.75   | 5.04    | 4.92   | 2.03 | 2.80E-02 | 2.43 | 5.96E-03 | -0.74 | 7.00E-01 | EGA2-2 |
| ENSMMUG00000030324  |           |                                                           | 28.41  | 112.31 | 231.38  | 146.23 | 1.74 | 3.01E-06 | 1.27 | 9.45E-04 | -0.87 | 1.15E-01 | EGA2-2 |
| ENSMMUG00000003448  | RPL26     | Ribosomal Protein L26                                     | 24.59  | 96.98  | 154.51  | 129.92 | 1.99 | 1.21E-08 | 0.80 | 4.04E-02 | -0.18 | 8.52E-01 | EGA2-2 |
| ENSMMUG000000048453 | RPL17     | Ribosomal Protein L17                                     | 36.75  | 141.15 | 378.26  | 362.00 | 1.81 | 9.94E-05 | 1.82 | 8.81E-05 | -0.38 | 7.22E-01 | EGA2-2 |
| ENSMMUG000000044871 | LOC715154 | 40S Ribosomal Protein S17 Pseudogene                      | 34.94  | 147.86 | 310.21  | 270.06 | 1.86 | 2.49E-05 | 1.48 | 9.72E-04 | -0.33 | 7.52E-01 | EGA2-2 |
| ENSMMUG000000001116 | SUZ12     | SUZ12 Polycomb Repressive Complex 2 Subunit               | 2.21   | 33.22  | 85.47   | 89.46  | 3.92 | 4.75E-19 | 1.53 | 1.41E-03 | -0.14 | 9.25E-01 | EGA2-2 |
| ENSMMUG000000042666 |           |                                                           | 28.23  | 100.07 | 238.76  | 197.11 | 1.84 | 5.63E-05 | 1.36 | 3.96E-03 | -0.22 | 8.65E-01 | EGA2-2 |
| ENSMMUG00000030217  |           |                                                           | 1.75   | 53.89  | 228.39  | 283.03 | 4.98 | 5.24E-09 | 2.76 | 2.26E-03 | -0.46 | 8.43E-01 | EGA2-2 |
| ENSMMUG000000039956 |           |                                                           | 13.52  | 70.10  | 142.10  | 75.00  | 2.72 | 1.73E-11 | 0.95 | 3.67E-02 | -0.92 | 1.44E-01 | EGA2-2 |
| ENSMMUG000000004502 | RPL23     | Ribosomal Protein L23                                     | 8.41   | 39.02  | 56.70   | 62.86  | 2.14 | 1.96E-09 | 0.89 | 2.28E-02 | -0.08 | 9.52E-01 | EGA2-2 |
| ENSMMUG000000004235 | RPL19     | Ribosomal Protein L19                                     | 130.49 | 464.97 | 710.82  | 621.86 | 1.72 | 2.84E-09 | 0.76 | 1.64E-02 | -0.28 | 6.74E-01 | EGA2-2 |
| ENSMMUG000000008090 | RPL27     | Ribosomal Protein L27                                     | 40.20  | 167.34 | 406.01  | 434.95 | 1.80 | 7.81E-05 | 1.72 | 1.62E-04 | 0.01  | 9.97E-01 | EGA2-2 |
| ENSMMUG000000029950 | LOC713497 | 60S Ribosomal Protein L36a-like                           | 29.14  | 109.37 | 248.18  | 174.72 | 1.97 | 2.30E-06 | 1.14 | 1.01E-02 | -0.37 | 6.96E-01 | EGA2-2 |
| ENSMMUG000000006605 |           |                                                           | 23.75  | 57.78  | 211.69  | 227.25 | 1.37 | 1.07E-02 | 2.17 | 1.48E-05 | -0.18 | 9.04E-01 | EGA2-2 |
| ENSMMUG000000016595 |           |                                                           | 0.11   | 3.49   | 6.30    | 3.96   | 4.37 | 1.39E-02 | 3.91 | 1.73E-02 | -3.05 | 2.15E-01 | EGA2-2 |
| ENSMMUG000000020582 | RPL38     | Ribosomal Protein L38                                     | 54.47  | 274.00 | 391.38  | 386.00 | 2.28 | 6.18E-09 | 0.89 | 4.35E-02 | -0.29 | 7.72E-01 | EGA2-2 |
| ENSMMUG000000013324 | GPRC5C    | G Protein-coupled Receptor Class C Group 5 Member C       | 0.03   | 0.26   | 5.30    | 7.55   | 2.79 | 1.99E-02 | 4.82 | 5.89E-06 | 2.49  | 1.17E-01 | EGA2-2 |
| ENSMMUG000000022412 |           |                                                           | 2.00   | 30.98  | 65.19   | 65.62  | 4.17 | 2.52E-23 | 1.34 | 3.75E-03 | -0.30 | 7.91E-01 | EGA2-2 |
| ENSMMUG000000003094 | CLDN6     | Claudin 6                                                 | 0.17   | 9.70   | 74.07   | 134.62 | 4.90 | 3.06E-08 | 4.12 | 3.00E-06 | 0.50  | 8.33E-01 | EGA2-2 |
| ENSMMUG000000029087 | LOC710665 | 60S Ribosomal Protein L38 Pseudogene                      | 10.41  | 49.76  | 84.57   | 71.73  | 2.04 | 2.03E-05 | 1.22 | 1.59E-02 | -0.24 | 8.59E-01 | EGA2-2 |
| ENSMMUG000000006763 | COX411    | Cytochrome C Oxidase Subunit IV Isoform 1                 | 14.54  | 34.70  | 88.50   | 104.05 | 1.31 | 2.11E-02 | 1.43 | 9.91E-03 | -0.02 | 9.94E-01 | EGA2-2 |
| ENSMMUG000000017928 | RPL13     | Ribosomal Protein L13                                     | 25.09  | 124.70 | 295.00  | 271.30 | 2.37 | 6.26E-10 | 1.66 | 2.71E-05 | -0.21 | 8.48E-01 | EGA2-2 |
| ENSMMUG000000010944 | GATA6     | GATA Binding Protein 6                                    | 10.84  | 40.94  | 135.56  | 122.26 | 1.68 | 3.84E-02 | 2.11 | 6.05E-03 | 0.04  | 9.91E-01 | EGA2-2 |

|                     |              |                                                                     |        |         |         |        |       |          |       |          |       |          |        |
|---------------------|--------------|---------------------------------------------------------------------|--------|---------|---------|--------|-------|----------|-------|----------|-------|----------|--------|
| ENSMMUG0000004664   | IMPACT       | Impact RWD Domain Protein                                           | 0.22   | 1.52    | 5.75    | 6.69   | 2.49  | 6.70E-03 | 2.75  | 2.03E-03 | 0.33  | 9.00E-01 | EGA2-2 |
| ENSMMUG0000007668   | DSC3         | Desmocollin 3                                                       | 0.00   | 0.31    | 1.11    | 0.47   | 5.42  | 1.09E-03 | 3.20  | 3.78E-02 | -0.31 | 9.54E-01 | EGA2-2 |
| ENSMMUG00000011687  | DSC2         | Desmocollin 2                                                       | 0.02   | 0.85    | 7.10    | 30.20  | 5.17  | 3.64E-09 | 3.12  | 3.80E-04 | 1.91  | 1.43E-01 | EGA2-2 |
| ENSMMUG00000014216  | TUBB4A       | Tubulin Beta 4A Class IVa                                           | 2.46   | 560.57  | 2378.90 | 885.88 | 7.64  | 1.16E-15 | 2.43  | 2.35E-02 | -2.09 | 1.76E-01 | EGA2-2 |
| ENSMMUG00000028889  | RPL21        | Ribosomal Protein L21                                               | 89.46  | 207.41  | 595.18  | 408.01 | 1.13  | 1.20E-02 | 1.66  | 7.71E-05 | -0.39 | 6.69E-01 | EGA2-2 |
| ENSMMUG00000008820  |              |                                                                     | 1.21   | 12.10   | 26.91   | 12.82  | 2.50  | 1.77E-02 | 2.11  | 4.47E-02 | -0.58 | 8.18E-01 | EGA2-2 |
| ENSMMUG00000014352  |              |                                                                     | 10.22  | 34.01   | 74.40   | 52.71  | 1.75  | 1.49E-04 | 1.02  | 3.77E-02 | -0.65 | 4.32E-01 | EGA2-2 |
| ENSMMUG00000028830  |              |                                                                     | 16.33  | 47.02   | 88.95   | 104.93 | 1.24  | 1.02E-02 | 1.28  | 7.30E-03 | -0.31 | 7.82E-01 | EGA2-2 |
| ENSMMUG00000003645  |              |                                                                     | 3.05   | 11.20   | 17.56   | 9.71   | 1.71  | 2.79E-04 | 1.24  | 1.12E-02 | -0.88 | 2.36E-01 | EGA2-2 |
| ENSMMUG00000011287  | LOC718556    | 40S Ribosomal Protein S6 Pseudogene                                 | 54.50  | 221.16  | 353.06  | 292.52 | 2.06  | 4.07E-15 | 0.78  | 7.08E-03 | -0.28 | 6.31E-01 | EGA2-2 |
| ENSMMUG00000000249  | CAPNS1       | Calpain Small Subunit 1                                             | 17.53  | 52.55   | 128.27  | 197.32 | 1.40  | 1.33E-02 | 1.31  | 1.99E-02 | 0.47  | 6.89E-01 | EGA2-2 |
| ENSMMUG00000019370  | RPS16        | Ribosomal Protein S16                                               | 76.19  | 296.50  | 532.67  | 391.09 | 2.03  | 7.31E-10 | 1.27  | 2.43E-04 | -0.72 | 1.71E-01 | EGA2-2 |
| ENSMMUG000000040167 |              |                                                                     | 15.78  | 47.31   | 96.85   | 71.71  | 1.68  | 5.23E-05 | 1.58  | 1.49E-04 | -0.85 | 1.87E-01 | EGA2-2 |
| ENSMMUG00000007551  | RPL13A       | Ribosomal Protein L13a                                              | 57.74  | 249.40  | 472.67  | 483.98 | 2.06  | 1.49E-07 | 1.35  | 1.01E-03 | -0.51 | 4.99E-01 | EGA2-2 |
| ENSMMUG00000006718  |              |                                                                     | 0.74   | 3.03    | 13.49   | 10.69  | 2.33  | 1.21E-02 | 2.03  | 2.88E-02 | -0.14 | 9.67E-01 | EGA2-2 |
| ENSMMUG000000045606 | MYADM        | Myeloid Associated Differentiation Marker                           | 6.22   | 15.20   | 50.16   | 51.76  | 1.44  | 1.39E-02 | 1.91  | 5.89E-04 | -0.21 | 9.00E-01 | EGA2-2 |
| ENSMMUG000000028684 | ATP8         | ATP Synthase FO Subunit 8                                           | #####  | #####   | #####   | #####  | 1.62  | 4.51E-02 | 1.93  | 1.27E-02 | -0.14 | 9.61E-01 | EGA2-2 |
| ENSMMUG000000028673 | ND5          | NADH Dehydrogenase Subunit 5                                        | #####  | #####   | #####   | #####  | 1.50  | 4.66E-02 | 1.94  | 6.51E-03 | -0.20 | 9.28E-01 | EGA2-2 |
| ENSMMUG000000028672 | ND6          | NADH Dehydrogenase Subunit 6                                        | #####  | 7324.69 | #####   | #####  | 1.59  | 4.08E-02 | 1.65  | 2.91E-02 | 0.27  | 9.00E-01 | EGA2-2 |
| ENSMMUG000000001813 | LOC723080    | POTE Ankyrin Domain Family Member H-like                            | 0.09   | 0.32    | 3.28    | 5.24   | 2.96  | 3.64E-02 | 3.22  | 7.86E-03 | 0.75  | 8.03E-01 | EGA2-2 |
| ENSMMUG000000045916 |              |                                                                     | 0.01   | 1.28    | 9.92    | 1.71   | 6.18  | 5.83E-04 | 3.39  | 4.71E-02 | -3.80 | 1.06E-01 | EGA2-2 |
| ENSMMUG000000041147 |              |                                                                     | 107.65 | 240.80  | 1121.98 | 500.20 | 1.22  | 2.15E-02 | 1.57  | 1.86E-03 | -1.00 | 1.90E-01 | EGA2-2 |
| ENSMMUG000000045339 |              |                                                                     | 45.50  | 168.37  | 314.50  | 283.50 | 1.98  | 4.37E-08 | 1.07  | 5.45E-03 | -0.24 | 7.94E-01 | EGA2-2 |
| ENSMMUG000000048181 |              |                                                                     | 4.70   | 14.67   | 37.89   | 29.03  | 1.65  | 1.35E-04 | 1.23  | 5.64E-03 | 0.12  | 9.32E-01 | EGA2-2 |
| ENSMMUG000000044249 |              |                                                                     | 110.51 | 405.50  | 609.19  | 473.75 | 1.76  | 2.29E-09 | 0.69  | 3.48E-02 | -0.29 | 6.52E-01 | EGA2-2 |
| ENSMMUG000000043502 |              |                                                                     | 34.42  | 178.92  | 419.96  | 341.41 | 2.23  | 5.32E-09 | 1.51  | 1.31E-04 | -0.74 | 2.39E-01 | EGA2-2 |
| ENSMMUG000000045462 | RPL34        | Ribosomal Protein L34                                               | 14.09  | 74.48   | 215.68  | 180.98 | 2.16  | 5.60E-03 | 1.80  | 2.22E-02 | -0.52 | 7.72E-01 | EGA2-2 |
| ENSMMUG00000019576  |              |                                                                     | 17.49  | 73.32   | 175.73  | 123.89 | 1.95  | 7.70E-05 | 1.42  | 5.25E-03 | -0.18 | 9.02E-01 | EGA2-2 |
| ENSMMUG000000000373 | SLC2A1       | Solute Carrier Family 2 Member 1                                    | 0.20   | 8.86    | 8.72    | 127.86 | 6.43  | 3.24E-11 | -1.83 | 9.97E-02 | 5.54  | 4.94E-07 | EGA2-4 |
| ENSMMUG000000045318 |              |                                                                     | 1.18   | 2.07    | 3.18    | 19.28  | 1.83  | 3.91E-02 | -0.62 | 5.52E-01 | 3.61  | 1.22E-04 | EGA2-4 |
| ENSMMUG000000005350 | EFNA1        | Ephrin A1                                                           | 0.15   | 1.83    | 1.55    | 3.44   | 4.40  | 1.40E-02 | -0.86 | 6.72E-01 | 4.93  | 1.32E-02 | EGA2-4 |
| ENSMMUG000000021371 | GATA2        | GATA Binding Protein 2                                              | 0.02   | 0.92    | 7.45    | 50.84  | 4.27  | 2.01E-04 | -0.57 | 7.09E-01 | 5.75  | 6.92E-07 | EGA2-4 |
| ENSMMUG000000012737 | PLXND1       | Plexin D1                                                           | 0.48   | 21.35   | 3.75    | 9.77   | 3.87  | 4.99E-03 | -2.50 | 8.47E-02 | 4.50  | 6.32E-03 | EGA2-4 |
| ENSMMUG000000045015 | ANKRD61      | Ankyrin Repeat Domain 61                                            | 0.02   | 1.26    | 0.26    | 1.28   | 7.35  | 3.87E-04 | -2.50 | 2.63E-01 | 5.64  | 2.37E-02 | EGA2-4 |
| ENSMMUG000000020139 | ZNF789       | Zinc Finger Protein 789                                             | 0.45   | 1.49    | 0.94    | 2.48   | 2.49  | 3.40E-02 | -1.02 | 4.53E-01 | 2.97  | 4.63E-02 | EGA2-4 |
| ENSMMUG000000006202 | SLC1A3       | Solute Carrier Family 1 Member 3                                    | 0.02   | 0.16    | 0.06    | 2.31   | 5.41  | 9.58E-03 | -3.61 | 7.43E-02 | 12.47 | 1.95E-10 | EGA2-4 |
| ENSMMUG000000004483 | HARS2        | Histidyl-tRNA Synthetase 2, Mitochondrial                           | 1.11   | 11.44   | 4.93    | 9.43   | 3.11  | 2.80E-04 | -1.03 | 3.10E-01 | 2.48  | 2.66E-02 | EGA2-4 |
| ENSMMUG00000010621  | HAND1        | Heart And Neural Crest Derivatives Expressed 1                      | 0.00   | 0.06    | 2.00    | 4.43   | 18.57 | 3.10E-20 | -0.11 | 9.74E-01 | 6.67  | 6.02E-03 | EGA2-4 |
| ENSMMUG000000004919 | FGFR4        | Fibroblast Growth Factor Receptor 4                                 | 0.01   | 1.29    | 1.10    | 7.07   | 7.48  | 3.62E-07 | -1.09 | 5.39E-01 | 3.84  | 4.30E-02 | EGA2-4 |
| ENSMMUG00000015693  | LY6G6C       | Lymphocyte Antigen 6 Family Member G6C                              | 0.06   | 4.62    | 6.52    | 118.66 | 6.05  | 1.14E-04 | -2.68 | 9.93E-02 | 5.74  | 7.69E-04 | EGA2-4 |
| ENSMMUG000000041372 | CD24         | CD24 Molecule                                                       | 0.05   | 1.10    | 2.65    | 30.04  | 4.59  | 5.06E-04 | -0.83 | 6.32E-01 | 6.78  | 2.21E-06 | EGA2-4 |
| ENSMMUG000000043240 |              |                                                                     | 0.15   | 4.47    | 4.68    | 10.18  | 7.46  | 2.95E-02 | -5.01 | 1.57E-01 | 9.57  | 1.51E-02 | EGA2-4 |
| ENSMMUG00000019691  | G2E3         | G2/M-phase Specific E3 Ubiquitin Protein Ligase                     | 0.26   | 3.79    | 3.61    | 6.38   | 3.11  | 7.07E-05 | 0.34  | 7.65E-01 | 2.42  | 1.67E-02 | EGA2-4 |
| ENSMMUG000000047259 | PLCXD1       | Phosphatidylinositol Specific Phospholipase C X Domain Containing 1 | 0.19   | 0.52    | 1.68    | 3.70   | 2.51  | 2.40E-03 | 1.36  | 1.21E-01 | 2.62  | 8.59E-03 | EGA2-4 |
| ENSMMUG000000003251 | XAGE3        | X Antigen Family Member 3                                           | 0.01   | 0.37    | 1.71    | 36.71  | 4.96  | 6.12E-03 | 1.11  | 5.70E-01 | 6.23  | 7.76E-04 | EGA2-4 |
| ENSMMUG000000017783 | LOC100424148 | Uncharacterized Protein CXorf49-like                                | 0.00   | 3.01    | 0.64    | 0.37   | 10.02 | 1.20E-07 | -3.62 | 5.73E-02 | 5.33  | 3.00E-02 | EGA2-4 |

|                     |           |                                                   |        |        |        |        |       |          |       |          |       |          |        |
|---------------------|-----------|---------------------------------------------------|--------|--------|--------|--------|-------|----------|-------|----------|-------|----------|--------|
| ENSMMUG00000012874  | PGK1      | Phosphoglycerate Kinase 1                         | 3.10   | 8.73   | 23.32  | 66.49  | 2.04  | 4.67E-02 | 1.32  | 2.24E-01 | 2.54  | 4.56E-02 | EGA2-4 |
| ENSMMUG00000022301  | AHNAK     | AHNAK Nucleoprotein                               | 2.63   | 6.19   | 20.74  | 134.15 | 1.77  | 3.92E-02 | -0.05 | 9.69E-01 | 4.15  | 1.92E-06 | EGA2-4 |
| ENSMMUG00000016438  | PRKD3     | Protein Kinase D3                                 | 1.89   | 5.65   | 5.27   | 11.24  | 1.58  | 1.64E-02 | -0.37 | 6.63E-01 | 1.82  | 2.52E-02 | EGA2-4 |
| ENSMMUG00000000005  | NAGA      | Alpha-N-acetylgalactosaminidase                   | 0.05   | 0.83   | 4.58   | 21.68  | 3.98  | 1.22E-02 | 1.75  | 2.68E-01 | 3.62  | 4.58E-02 | EGA2-4 |
| ENSMMUG00000002424  | FBLN1     | Fibulin 1                                         | 0.31   | 2.99   | 1.90   | 8.00   | 3.67  | 6.84E-03 | -0.90 | 5.96E-01 | 3.51  | 4.54E-02 | EGA2-4 |
| ENSMMUG00000045660  | FAM83G    | Family With Sequence Similarity 83 Member G       | 0.02   | 0.18   | 0.42   | 1.67   | 4.70  | 5.82E-03 | -1.89 | 3.11E-01 | 5.42  | 6.01E-03 | EGA2-4 |
| ENSMMUG00000003324  | PRR15L    | Proline Rich 15 Like                              | 0.00   | 3.65   | 0.21   | 1.81   | 6.57  | 4.90E-05 | -1.82 | 2.80E-01 | 6.98  | 3.77E-05 | EGA2-4 |
| ENSMMUG00000018011  | SPHK1     | Sphingosine Kinase 1                              | 0.00   | 2.18   | 2.56   | 8.60   | 6.75  | 5.18E-04 | 0.36  | 8.88E-01 | 5.32  | 1.49E-02 | EGA2-4 |
| ENSMMUG00000040362  | EMP2      | Epithelial Membrane Protein 2                     | 0.17   | 15.69  | 20.79  | 78.32  | 6.25  | 2.00E-12 | 0.02  | 9.87E-01 | 2.92  | 1.47E-02 | EGA2-4 |
| ENSMMUG00000011690  | DSC1      | Desmocollin 1                                     | 0.00   | 0.42   | 0.78   | 6.82   | 3.64  | 1.91E-02 | -1.52 | 3.77E-01 | 4.73  | 6.18E-03 | EGA2-4 |
| ENSMMUG00000019976  | ATP8B1    | ATPase Phospholipid Transporting 8B1              | 0.63   | 2.78   | 1.04   | 10.62  | 2.09  | 3.80E-02 | -1.50 | 1.54E-01 | 3.52  | 1.64E-03 | EGA2-4 |
| ENSMMUG00000040573  | PMAIP1    | Phorbol-12-myristate-13-acetate-induced Protein 1 | 0.19   | 1.22   | 1.36   | 5.04   | 4.50  | 1.38E-02 | -2.82 | 1.36E-01 | 4.66  | 4.01E-02 | EGA2-4 |
| ENSMMUG00000008938  | CNDP2     | Carnosine Dipeptidase 2                           | 0.71   | 4.97   | 6.86   | 22.46  | 3.12  | 5.16E-06 | 0.21  | 8.39E-01 | 2.05  | 2.44E-02 | EGA2-4 |
| ENSMMUG00000000159  | REX1BD    | Required For Excision 1-B Domain Containing       | 0.12   | 2.17   | 4.94   | 9.71   | 5.68  | 9.75E-11 | 0.02  | 9.86E-01 | 2.52  | 3.00E-02 | EGA2-4 |
| ENSMMUG00000023207  | FXYS5     | FXYS5 Domain Containing Ion Transport Regulator 5 | 0.01   | 0.31   | 0.25   | 1.55   | 7.17  | 3.99E-04 | -1.42 | 5.35E-01 | 5.03  | 3.79E-02 | EGA2-4 |
| ENSMMUG00000044981  | MIR519A-2 | MicroRNA 519a-2                                   | 0.00   | 0.65   | 3.15   | 1.90   | 15.26 | 3.22E-03 | -0.41 | 9.59E-01 | 16.95 | 6.17E-03 | EGA2-4 |
| ENSMMUG00000042322  |           |                                                   | 0.00   | 2.61   | 0.48   | 1.67   | 20.92 | 1.25E-24 | -0.67 | 8.20E-01 | 6.61  | 8.83E-03 | EGA2-4 |
| ENSMMUG00000011264  |           |                                                   | 1.17   | 15.27  | 14.98  | 0.72   | 3.76  | 6.52E-03 | -0.43 | 8.26E-01 | -4.03 | 2.06E-02 | EGA2-3 |
| ENSMMUG00000032121  | ZYG11A    | Zyg-11 Family Member A, Cell Cycle Regulator      | 0.65   | 15.72  | 18.50  | 4.66   | 4.70  | 3.83E-16 | 0.28  | 7.46E-01 | -2.00 | 1.04E-02 | EGA2-3 |
| ENSMMUG00000013680  | FAM151A   | Family With Sequence Similarity 151 Member A      | 0.00   | 5.54   | 4.08   | 0.13   | 10.09 | 3.29E-09 | -0.30 | 9.05E-01 | -5.79 | 6.28E-03 | EGA2-3 |
| ENSMMUG00000031542  | IGSF8     | Immunoglobulin Superfamily Member 8               | 0.03   | 2.16   | 4.20   | 0.33   | 10.92 | 2.69E-08 | 1.76  | 4.71E-01 | -5.50 | 3.40E-02 | EGA2-3 |
| ENSMMUG00000046792  |           |                                                   | 0.01   | 1.12   | 1.69   | 0.04   | 6.86  | 4.28E-05 | 1.81  | 3.62E-01 | -6.82 | 9.86E-04 | EGA2-3 |
| ENSMMUG00000002861  | TMEM45A   | Transmembrane Protein 45A                         | 0.34   | 6.81   | 7.65   | 0.47   | 4.04  | 1.01E-03 | 0.67  | 6.84E-01 | -4.56 | 1.88E-03 | EGA2-3 |
| ENSMMUG00000014231  | BTLA      | B And T Lymphocyte Associated                     | 0.08   | 2.31   | 13.95  | 0.54   | 5.39  | 1.97E-06 | 2.04  | 1.04E-01 | -4.34 | 1.72E-03 | EGA2-3 |
| ENSMMUG00000016395  | ARGFX     | Arginine-fifty Homeobox                           | 0.16   | 82.11  | 144.27 | 31.98  | 8.71  | 2.52E-23 | 1.35  | 1.95E-01 | -2.81 | 1.76E-02 | EGA2-3 |
| ENSMMUG00000031684  | FAM198A   | Family With Sequence Similarity 198 Member A      | 0.57   | 10.89  | 9.83   | 1.18   | 3.37  | 4.33E-04 | 0.75  | 5.37E-01 | -4.30 | 7.35E-05 | EGA2-3 |
| ENSMMUG00000020342  | KAT2B     | Lysine Acetyltransferase 2B                       | 1.08   | 18.42  | 23.93  | 1.76   | 4.10  | 3.16E-07 | 0.93  | 3.49E-01 | -4.20 | 4.89E-06 | EGA2-3 |
| ENSMMUG00000015473  | CFAP97    | Cilia And Flagella Associated Protein 97          | 9.21   | 36.14  | 35.38  | 6.13   | 1.40  | 1.21E-02 | 0.10  | 9.06E-01 | -2.19 | 4.23E-04 | EGA2-3 |
| ENSMMUG00000045620  |           |                                                   | 20.60  | 55.37  | 49.80  | 24.97  | 1.37  | 2.88E-04 | -0.05 | 9.31E-01 | -1.01 | 4.80E-02 | EGA2-3 |
| ENSMMUG00000011958  |           |                                                   | 12.76  | 314.56 | 294.43 | 70.40  | 4.52  | 3.01E-16 | -0.18 | 8.43E-01 | -1.95 | 8.87E-03 | EGA2-3 |
| ENSMMUG00000002277  | UBN2      | Ubinuclein 2                                      | 15.68  | 33.08  | 22.49  | 13.29  | 1.00  | 3.05E-03 | -0.66 | 6.18E-02 | -0.91 | 3.90E-02 | EGA2-3 |
| ENSMMUG000000038794 | BRIX1     | BRX1, Biogenesis Of Ribosomes                     | 9.56   | 22.51  | 16.91  | 7.26   | 1.25  | 6.27E-03 | -0.40 | 4.60E-01 | -1.18 | 4.67E-02 | EGA2-3 |
| ENSMMUG00000018972  | POLR3G    | RNA Polymerase III Subunit G                      | 4.18   | 15.43  | 19.25  | 10.15  | 1.71  | 4.46E-03 | 0.74  | 2.79E-01 | -1.72 | 2.28E-02 | EGA2-3 |
| ENSMMUG00000014782  | STC2      | Stanniocalcin 2                                   | 0.66   | 5.79   | 3.37   | 1.39   | 4.35  | 9.15E-05 | -1.45 | 2.67E-01 | -3.38 | 2.00E-02 | EGA2-3 |
| ENSMMUG00000015975  |           |                                                   | 1.52   | 38.05  | 44.98  | 9.29   | 4.48  | 1.37E-12 | 0.02  | 9.85E-01 | -2.18 | 9.92E-03 | EGA2-3 |
| ENSMMUG00000014072  | IER3      | Immediate Early Response 3                        | 0.80   | 114.17 | 85.97  | 4.42   | 7.29  | 7.15E-14 | -0.09 | 9.57E-01 | -3.44 | 7.71E-03 | EGA2-3 |
| ENSMMUG00000029466  |           |                                                   | 0.07   | 1.95   | 1.72   | 0.14   | 10.22 | 1.05E-06 | -2.67 | 2.50E-01 | -6.03 | 2.72E-02 | EGA2-3 |
| ENSMMUG00000020693  | RSL24D1   | Ribosomal L24 Domain Containing 1                 | 13.99  | 54.68  | 64.59  | 31.46  | 1.71  | 1.11E-05 | 0.46  | 3.31E-01 | -1.23 | 1.57E-02 | EGA2-3 |
| ENSMMUG00000014886  | PAQR5     | Progesterone And AdipoQ Receptor Family Member 5  | 0.01   | 0.91   | 0.54   | 0.09   | 4.69  | 6.97E-03 | 0.35  | 8.84E-01 | -5.37 | 8.29E-03 | EGA2-3 |
| ENSMMUG00000004341  | MAX       | MYC Associated Factor X                           | 119.37 | 603.01 | 567.18 | 99.45  | 2.38  | 9.55E-09 | -0.31 | 5.88E-01 | -2.20 | 4.40E-06 | EGA2-3 |
| ENSMMUG00000010620  | WDR45     | WD Repeat Domain 45                               | 2.81   | 34.32  | 32.33  | 6.05   | 3.31  | 6.00E-05 | -0.15 | 9.06E-01 | -2.35 | 3.26E-02 | EGA2-3 |



|                     |              |                                                                  |        |        |         |        |      |          |       |          |       |          |        |
|---------------------|--------------|------------------------------------------------------------------|--------|--------|---------|--------|------|----------|-------|----------|-------|----------|--------|
| ENSMMUG00000021739  |              |                                                                  | 30.64  | 244.43 | 87.44   | 5.43   | 2.54 | 3.55E-03 | -1.71 | 6.12E-02 | -2.74 | 1.08E-02 | EGA2-3 |
| ENSMMUG00000022303  | SLC7A2       | Solute Carrier Family 7 Member 2                                 | 0.83   | 29.99  | 57.70   | 12.67  | 5.21 | 1.12E-08 | 1.52  | 1.54E-01 | -2.58 | 4.43E-02 | EGA2-3 |
| ENSMMUG00000042006  | CA13         | Carbonic Anhydrase 13                                            | 0.06   | 5.96   | 4.53    | 0.16   | 6.05 | 1.84E-06 | 0.38  | 8.41E-01 | -5.46 | 2.51E-04 | EGA2-3 |
| ENSMMUG00000003665  | PLBD1        | Phospholipase B Domain Containing 1                              | 0.04   | 2.84   | 17.04   | 0.92   | 4.22 | 8.41E-03 | 3.06  | 5.92E-02 | -4.69 | 1.59E-02 | EGA2-3 |
| ENSMMUG00000016628  | HELB         | DNA Helicase B                                                   | 1.90   | 12.03  | 17.24   | 3.03   | 2.53 | 5.37E-04 | 0.59  | 5.23E-01 | -2.66 | 2.38E-03 | EGA2-3 |
| ENSMMUG00000042077  |              |                                                                  | 0.08   | 26.49  | 49.87   | 5.67   | 8.79 | 3.25E-19 | 1.11  | 2.47E-01 | -2.82 | 9.92E-03 | EGA2-3 |
| ENSMMUG00000012317  | DPF2         | Double PHD Fingers 2                                             | 33.03  | 253.17 | 195.10  | 39.26  | 2.85 | 2.78E-08 | -0.48 | 4.75E-01 | -1.68 | 1.38E-02 | EGA2-3 |
| ENSMMUG00000002183  | OSBPL6       | Oxysterol Binding Protein Like 6                                 | 1.51   | 5.63   | 7.71    | 1.32   | 1.88 | 7.85E-03 | 0.86  | 2.80E-01 | -3.16 | 3.78E-05 | EGA2-3 |
| ENSMMUG00000003314  | AQP3         | Aquaporin 3 (Gill Blood Group)                                   | 10.74  | 217.24 | 90.25   | 15.72  | 4.23 | 2.34E-08 | -0.92 | 3.26E-01 | -2.80 | 3.78E-03 | EGA2-3 |
| ENSMMUG00000040135  | PDCL3        | Phosducin Like 3                                                 | 20.47  | 517.61 | 543.56  | 126.34 | 4.56 | 2.17E-16 | 0.18  | 8.41E-01 | -1.96 | 8.43E-03 | EGA2-3 |
| ENSMMUG00000010657  | LOC700564    | Melanoma Antigen Preferentially Expressed In Tumors              | 1.23   | 32.17  | 10.58   | 2.10   | 4.75 | 3.98E-07 | -1.42 | 2.00E-01 | -2.95 | 1.82E-02 | EGA2-3 |
| ENSMMUG00000012118  | EFCAB5       | EF-hand Calcium Binding Domain 5                                 | 0.04   | 2.35   | 1.87    | 0.20   | 4.94 | 1.03E-04 | 1.37  | 3.77E-01 | -3.75 | 3.10E-02 | EGA2-3 |
| ENSMMUG00000047705  |              |                                                                  | 0.04   | 1.16   | 0.74    | 0.57   | 8.81 | 1.02E-05 | -0.93 | 7.39E-01 | -5.58 | 4.54E-02 | EGA2-3 |
| ENSMMUG00000019632  | RSL1D1       | Ribosomal L1 Domain Containing 1                                 | 71.54  | 256.81 | 245.91  | 88.87  | 1.76 | 2.29E-10 | 0.03  | 9.48E-01 | -1.36 | 3.77E-05 | EGA2-3 |
| ENSMMUG00000013877  | OTOA         | Otoancorin                                                       | 1.03   | 4.90   | 3.74    | 0.07   | 2.94 | 2.68E-02 | -2.36 | 8.51E-02 | -3.60 | 3.77E-02 | EGA2-3 |
| ENSMMUG00000018102  | C20H16orf70  | Chromosome 20 Open Reading Frame, Human C16orf70                 | 5.56   | 17.76  | 16.21   | 5.07   | 1.73 | 1.21E-02 | -0.02 | 9.85E-01 | -2.17 | 8.28E-03 | EGA2-3 |
| ENSMMUG00000021792  | ATP9B        | ATPase Phospholipid Transporting 9B (putative)                   | 5.42   | 18.21  | 7.63    | 2.92   | 1.56 | 2.37E-02 | -0.95 | 1.98E-01 | -1.89 | 2.59E-02 | EGA2-3 |
| ENSMMUG00000028843  | SLC5A5       | Solute Carrier Family 5 Member 5                                 | 0.12   | 2.53   | 0.41    | 0.02   | 5.40 | 2.07E-03 | -1.51 | 4.63E-01 | -5.91 | 6.14E-03 | EGA2-3 |
| ENSMMUG00000009292  | ZIK1         | Zinc Finger Protein Interacting With K Protein 1                 | 3.00   | 10.26  | 5.87    | 1.46   | 1.76 | 2.48E-03 | -0.86 | 1.85E-01 | -1.70 | 2.20E-02 | EGA2-3 |
| ENSMMUG00000015673  | ZIM3         | Zinc Finger Imprinted 3                                          | 0.27   | 274.54 | 100.41  | 7.11   | 9.34 | 1.64E-34 | -1.18 | 2.08E-01 | -3.55 | 1.82E-04 | EGA2-3 |
| ENSMMUG00000012157  | USP29        | Ubiquitin Specific Peptidase 29                                  | 0.20   | 13.43  | 4.97    | 0.71   | 5.35 | 2.05E-10 | -1.16 | 2.60E-01 | -2.47 | 3.78E-02 | EGA2-3 |
| ENSMMUG00000039741  | LOC720395    | Class I Histocompatibility Antigen, Gogo-B*0101 Alpha Chain-like | 0.13   | 3.95   | 11.63   | 0.61   | 5.50 | 4.75E-05 | 0.95  | 5.87E-01 | -4.88 | 4.26E-03 | EGA2-3 |
| ENSMMUG00000007377  | LOC106995802 | Zinc Finger Protein 679-like                                     | 5.71   | 414.20 | 227.89  | 13.52  | 5.84 | 5.96E-17 | -0.67 | 4.73E-01 | -3.77 | 5.72E-06 | EGA2-3 |
| ENSMMUG000000041735 |              |                                                                  | 4.05   | 20.57  | 23.71   | 10.10  | 2.73 | 4.87E-05 | 0.03  | 9.78E-01 | -2.03 | 2.20E-02 | EGA2-3 |
| ENSMMUG00000043586  | ID3          | Inhibitor Of DNA Binding 3, HLH Protein                          | 0.22   | 2.24   | 3.47    | 1.50   | 3.08 | 8.09E-03 | 2.88  | 1.29E-02 | -3.90 | 5.08E-03 | EGA2-5 |
| ENSMMUG00000032031  | LOC713714    | 60S Ribosomal Protein L12 Pseudogene                             | 90.60  | 215.32 | 463.94  | 383.19 | 0.97 | 7.35E-03 | 1.66  | 9.99E-07 | -1.20 | 5.44E-03 | EGA2-5 |
| ENSMMUG00000001349  | CHL1         | Cell Adhesion Molecule L1 Like                                   | 0.00   | 0.75   | 0.80    | 0.49   | 9.48 | 1.54E-07 | 5.87  | 5.78E-04 | -5.55 | 6.19E-03 | EGA2-5 |
| ENSMMUG00000031898  |              |                                                                  | 65.75  | 324.11 | 591.82  | 351.08 | 2.22 | 7.77E-13 | 1.06  | 1.51E-03 | -0.89 | 4.58E-02 | EGA2-5 |
| ENSMMUG00000044501  | LOC702620    | 60S Ribosomal Protein L12 Pseudogene                             | 81.15  | 186.80 | 430.61  | 349.14 | 0.94 | 5.46E-03 | 1.76  | 2.26E-08 | -1.17 | 3.30E-03 | EGA2-5 |
| ENSMMUG00000048214  | LOC715037    | 60S Ribosomal Protein L12 Pseudogene                             | 78.80  | 188.40 | 398.09  | 306.02 | 0.99 | 4.38E-03 | 1.59  | 1.36E-06 | -1.20 | 3.29E-03 | EGA2-5 |
| ENSMMUG00000039222  |              |                                                                  | 82.51  | 194.68 | 402.21  | 334.32 | 0.95 | 8.19E-03 | 1.64  | 1.03E-06 | -1.17 | 6.18E-03 | EGA2-5 |
| ENSMMUG00000042009  |              |                                                                  | 0.05   | 1.11   | 46.14   | 20.75  | 2.96 | 3.50E-03 | 7.82  | 6.09E-19 | -2.75 | 2.52E-02 | EGA2-5 |
| ENSMMUG00000029534  |              |                                                                  | 148.33 | 738.03 | 1285.66 | 732.90 | 2.19 | 4.00E-13 | 1.03  | 1.52E-03 | -0.91 | 3.26E-02 | EGA2-5 |
| ENSMMUG00000023265  | AKAP12       | A-kinase Anchoring Protein 12                                    | 0.27   | 12.88  | 185.26  | 31.19  | 4.07 | 1.11E-05 | 5.88  | 8.08E-11 | -3.81 | 5.39E-04 | EGA2-5 |
| ENSMMUG00000014412  |              |                                                                  | 102.59 | 493.58 | 839.47  | 489.45 | 2.13 | 2.85E-11 | 1.00  | 3.82E-03 | -0.94 | 3.84E-02 | EGA2-5 |
| ENSMMUG00000032052  | LOC699681    | 60S Ribosomal Protein L12 Pseudogene                             | 28.42  | 60.28  | 135.34  | 111.37 | 0.98 | 9.33E-03 | 1.64  | 3.84E-06 | -1.06 | 2.47E-02 | EGA2-5 |
| ENSMMUG00000020873  | SPIC         | Spi-C Transcription Factor                                       | 0.02   | 2.70   | 42.69   | 18.78  | 4.08 | 2.15E-03 | 6.37  | 3.08E-08 | -3.41 | 3.00E-02 | EGA2-5 |

|                     |              |                                      |        |        |        |        |       |          |      |          |       |          |        |
|---------------------|--------------|--------------------------------------|--------|--------|--------|--------|-------|----------|------|----------|-------|----------|--------|
| ENSMMUG00000041517  | LOC100427498 | 60S Ribosomal Protein L12 Pseudogene | 63.47  | 135.11 | 328.72 | 268.40 | 0.88  | 1.94E-02 | 1.79 | 1.86E-07 | -1.15 | 9.19E-03 | EGA2-5 |
| ENSMMUG00000000422  | RPL12        | Ribosomal Protein L12                | 154.40 | 366.65 | 808.15 | 658.84 | 1.00  | 4.76E-03 | 1.68 | 3.83E-07 | -1.20 | 4.01E-03 | EGA2-5 |
| ENSMMUG00000031250  | LOC708085    | 60S Ribosomal Protein L31 Pseudogene | 67.57  | 159.10 | 395.38 | 240.63 | 1.28  | 1.77E-03 | 1.47 | 2.20E-04 | -1.11 | 3.73E-02 | EGA2-5 |
| ENSMMUG00000002704  |              |                                      | 69.66  | 344.55 | 618.20 | 346.13 | 2.18  | 1.16E-13 | 1.07 | 6.64E-04 | -0.90 | 2.77E-02 | EGA2-5 |
| ENSMMUG000000047655 |              |                                      | 51.58  | 267.52 | 464.56 | 219.41 | 2.45  | 5.51E-12 | 0.92 | 1.97E-02 | -1.01 | 4.75E-02 | EGA2-5 |
| ENSMMUG00000013429  | RPS19        | Ribosomal Protein S19                | 62.50  | 334.42 | 602.98 | 311.33 | 2.50  | 1.03E-13 | 0.99 | 7.19E-03 | -0.96 | 4.62E-02 | EGA2-5 |
| ENSMMUG00000002309  | LOC720019    | 60S Ribosomal Protein L12-like       | 137.49 | 318.87 | 707.03 | 578.55 | 0.97  | 5.74E-03 | 1.70 | 2.53E-07 | -1.21 | 3.24E-03 | EGA2-5 |
| ENSMMUG000000043313 |              |                                      | 99.74  | 226.38 | 498.34 | 398.16 | 0.93  | 8.85E-03 | 1.67 | 4.06E-07 | -1.22 | 3.11E-03 | EGA2-5 |
| ENSMMUG000000042854 |              |                                      | 0.00   | 0.89   | 2.69   | 0.82   | 11.04 | 1.65E-05 | 5.23 | 4.42E-02 | 13.52 | 8.40E-07 | EGA2-6 |

- a) FPKM: Fragments Per Kilobase of transcript per Million mapped reads.
- b) L2FC: Log fold change of base 2.
- c) FDR: False discovery rate. Adjusted p-value using the Benjamin-Hochberg method.
