# Supplementary material
Source: PubMed Central journal article supplement (PMC6417155)
Supplement: gaz001_schall_et_al._table_s5.pdf [file gaz001_schall_et_al._table_s5.pdf]

Table S5 - EGA3 super-group DEGs

| Ensembl ID         | Symbol    | GeneName                                                  | FPKM <sup>a</sup> |       |        |            | MII:8-Cell        |                  | 8-Cell:Morula |          | Morula:Blast |          | Sub-Group |
|--------------------|-----------|-----------------------------------------------------------|-------------------|-------|--------|------------|-------------------|------------------|---------------|----------|--------------|----------|-----------|
|                    |           |                                                           | MII               | 8Cell | Morula | Exp. Blast | L2FC <sup>b</sup> | FDR <sup>c</sup> | L2FC          | FDR      | L2FC         | FDR      |           |
| ENSMMUG0000000838  | AGRN      | Agrin                                                     | 0.14              | 0.21  | 2.73   | 5.47       | -0.47             | 8.12E-01         | 3.73          | 5.91E-03 | -0.01        | 9.99E-01 | EGA3-1    |
| ENSMMUG00000013280 | VWA1      | Von Willebrand Factor A Domain Containing 1               | 0.11              | 0.27  | 1.89   | 3.17       | -1.20             | 5.12E-01         | 4.00          | 5.12E-03 | 1.01         | 7.58E-01 | EGA3-1    |
| ENSMMUG00000038836 | SMIM1     | Small Integral Membrane Protein 1 (Vel Blood Group)       | 0.32              | 0.32  | 5.19   | 11.07      | -1.07             | 5.75E-01         | 4.51          | 2.27E-03 | 0.06         | 9.92E-01 | EGA3-1    |
| ENSMMUG00000038181 | PARK7     | Parkinsonism Associated Deglycase                         | 5.92              | 4.36  | 8.67   | 10.65      | -0.87             | 2.03E-01         | 1.36          | 2.84E-02 | 0.49         | 7.10E-01 | EGA3-1    |
| ENSMMUG00000005863 | NMNAT1    | Nicotinamide Nucleotide Adenylyltransferase 1             | 0.05              | 0.32  | 1.49   | 1.64       | 1.63              | 3.08E-01         | 3.99          | 2.27E-03 | 0.27         | 9.53E-01 | EGA3-1    |
| ENSMMUG00000016296 | UBE4B     | Ubiquitination Factor E4B                                 | 8.99              | 5.77  | 13.03  | 14.92      | -0.80             | 2.34E-01         | 1.43          | 1.70E-02 | -0.17        | 9.25E-01 | EGA3-1    |
| ENSMMUG00000040221 |           |                                                           | 1.03              | 0.71  | 1.48   | 1.46       | -1.59             | 7.85E-02         | 1.88          | 2.97E-02 | -0.65        | 7.32E-01 | EGA3-1    |
| ENSMMUG00000007459 |           |                                                           | 0.08              | 0.21  | 1.86   | 2.50       | 0.96              | 5.38E-01         | 2.99          | 1.54E-02 | 2.15         | 2.51E-01 | EGA3-1    |
| ENSMMUG00000007829 | CLCN6     | Chloride Voltage-gated Channel 6                          | 0.48              | 0.59  | 2.39   | 2.45       | -0.25             | 8.82E-01         | 2.33          | 3.73E-02 | 0.23         | 9.51E-01 | EGA3-1    |
| ENSMMUG00000006669 | UBR4      | Ubiquitin Protein Ligase E3 Component N-recognin 4        | 6.99              | 6.11  | 13.75  | 14.77      | -0.11             | 9.05E-01         | 1.52          | 1.15E-02 | -0.15        | 9.42E-01 | EGA3-1    |
| ENSMMUG00000006891 | LOC715583 | Aflatoxin B1 Aldehyde Reductase Member 4                  | 0.45              | 0.26  | 1.49   | 0.65       | -1.71             | 2.13E-01         | 3.65          | 2.36E-03 | -1.12        | 6.58E-01 | EGA3-1    |
| ENSMMUG00000008835 | LOC698013 | Serine/threonine-protein Kinase PINK1, Mitochondrial      | 3.88              | 1.76  | 17.72  | 27.05      | -0.93             | 3.13E-01         | 3.35          | 8.52E-06 | 0.77         | 6.25E-01 | EGA3-1    |
| ENSMMUG00000004149 | EIF4G3    | Eukaryotic Translation Initiation Factor 4 Gamma 3        | 10.94             | 12.05 | 27.38  | 30.90      | 0.37              | 5.43E-01         | 1.28          | 7.74E-03 | 0.03         | 9.87E-01 | EGA3-1    |
| ENSMMUG00000017344 | USP48     | Ubiquitin Specific Peptidase 48                           | 17.99             | 20.78 | 31.61  | 29.42      | 0.03              | 9.73E-01         | 1.17          | 4.40E-02 | -0.34        | 8.03E-01 | EGA3-1    |
| ENSMMUG00000042211 |           |                                                           | 2.42              | 7.29  | 28.24  | 23.97      | 1.39              | 1.08E-01         | 2.04          | 9.44E-03 | -0.32        | 8.88E-01 | EGA3-1    |
| ENSMMUG00000040714 |           |                                                           | 0.01              | 0.32  | 4.08   | 14.68      | 2.89              | 7.51E-02         | 5.06          | 4.34E-05 | 1.06         | 6.92E-01 | EGA3-1    |
| ENSMMUG00000043260 | ADPRHL2   | ADP-ribosylhydrolase Like 2                               | 0.05              | 0.19  | 0.60   | 0.99       | 1.62              | 3.94E-01         | 3.17          | 4.97E-02 | -0.31        | 9.54E-01 | EGA3-1    |
| ENSMMUG00000022499 | TRAPPC3   | Trafficking Protein Particle Complex 3                    | 0.66              | 2.90  | 19.39  | 8.57       | 1.79              | 7.38E-02         | 3.53          | 8.36E-05 | -0.99        | 5.87E-01 | EGA3-1    |
| ENSMMUG00000020433 | MRPS15    | Mitochondrial Ribosomal Protein S15                       | 18.57             | 45.41 | 96.68  | 86.01      | 1.07              | 9.15E-02         | 1.73          | 2.87E-03 | -1.02        | 2.62E-01 | EGA3-1    |
| ENSMMUG00000021561 | NDUF55    | NADH:ubiquinone Oxidoreductase Subunit S5                 | 8.58              | 16.44 | 43.91  | 65.34      | 0.53              | 4.97E-01         | 1.91          | 2.29E-03 | 0.66         | 5.97E-01 | EGA3-1    |
| ENSMMUG00000009562 | MACF1     | Microtubule-actin Crosslinking Factor 1                   | 4.17              | 4.41  | 7.57   | 10.18      | -0.05             | 9.57E-01         | 1.25          | 3.23E-02 | -0.27        | 8.54E-01 | EGA3-1    |
| ENSMMUG00000015158 | SLC6A9    | Solute Carrier Family 6 Member 9                          | 0.28              | 0.32  | 1.92   | 0.72       | -1.56             | 4.26E-01         | 3.42          | 3.85E-02 | 1.57         | 6.20E-01 | EGA3-1    |
| ENSMMUG00000005342 | EIF2B3    | Eukaryotic Translation Initiation Factor 2B Subunit Gamma | 4.20              | 5.95  | 16.77  | 14.97      | -0.42             | 7.24E-01         | 2.46          | 4.07E-03 | 1.02         | 5.21E-01 | EGA3-1    |
| ENSMMUG00000010773 | LOC693506 | NADH Dehydrogenase [ubiquinone] Iron-sulfur Protein 5     | 4.76              | 7.45  | 19.59  | 27.70      | 0.33              | 7.75E-01         | 1.84          | 2.96E-02 | 0.62         | 7.42E-01 | EGA3-1    |
| ENSMMUG00000004204 | UQCRH     | Ubiquinol-cytochrome C Reductase Hinge Protein            | 0.97              | 3.67  | 14.37  | 23.44      | 1.39              | 1.80E-01         | 1.90          | 4.32E-02 | 2.34         | 5.33E-02 | EGA3-1    |
| ENSMMUG00000032145 |           |                                                           | 0.68              | 0.14  | 5.16   | 9.85       | -4.24             | 6.12E-02         | 6.82          | 1.09E-03 | 1.47         | 7.57E-01 | EGA3-1    |
| ENSMMUG00000044018 |           |                                                           | 0.44              | 0.40  | 3.06   | 8.08       | -3.10             | 6.77E-02         | 5.29          | 6.60E-04 | 0.12         | 9.82E-01 | EGA3-1    |
| ENSMMUG00000001434 | ZYG11B    | Zyg-11 Family Member B, Cell Cycle Regulator              | 1.03              | 0.94  | 7.37   | 4.24       | -0.69             | 6.89E-01         | 3.92          | 1.81E-03 | -1.44        | 5.50E-01 | EGA3-1    |
| ENSMMUG00000007606 | CPT2      | Carnitine Palmitoyltransferase 2                          | 0.72              | 0.30  | 3.24   | 2.02       | -1.61             | 3.00E-01         | 3.53          | 8.11E-03 | 0.18         | 9.72E-01 | EGA3-1    |
| ENSMMUG00000005740 | USP24     | Ubiquitin Specific Peptidase 24                           | 10.36             | 8.60  | 13.98  | 16.73      | -0.49             | 3.88E-01         | 1.01          | 3.86E-02 | 0.10         | 9.52E-01 | EGA3-1    |

|                     |              |                                                          |       |       |        |        |       |          |      |          |       |          |        |
|---------------------|--------------|----------------------------------------------------------|-------|-------|--------|--------|-------|----------|------|----------|-------|----------|--------|
| ENSMMUG00000002200  | PLPP3        | Phospholipid Phosphatase 3                               | 0.07  | 0.13  | 1.40   | 2.71   | 2.81  | 1.19E-01 | 3.48 | 2.14E-02 | 0.13  | 9.81E-01 | EGA3-1 |
| ENSMMUG00000003113  | PATJ         | PATJ, Crumbs Cell Polarity Complex Component             | 2.44  | 2.48  | 9.45   | 15.57  | -0.53 | 6.70E-01 | 2.84 | 1.81E-03 | -0.81 | 6.80E-01 | EGA3-1 |
| ENSMMUG000000010351 |              |                                                          | 0.07  | 0.04  | 0.84   | 5.09   | -2.31 | 1.14E-01 | 5.90 | 4.03E-06 | 0.55  | 8.78E-01 | EGA3-1 |
| ENSMMUG000000018263 |              |                                                          | 0.01  | 0.11  | 2.15   | 1.54   | 2.77  | 2.06E-01 | 5.34 | 2.32E-03 | -2.66 | 3.80E-01 | EGA3-1 |
| ENSMMUG000000021441 | AGL          | Amylo-alpha-1, 6-glucosidase, 4-alpha-glucanotransferase | 1.05  | 1.26  | 3.63   | 3.56   | 0.13  | 9.18E-01 | 1.79 | 2.94E-02 | -0.05 | 9.86E-01 | EGA3-1 |
| ENSMMUG000000015083 |              |                                                          | 0.29  | 1.13  | 30.46  | 214.62 | 1.25  | 2.69E-01 | 4.66 | 2.71E-07 | 2.33  | 6.89E-02 | EGA3-1 |
| ENSMMUG00000000811  | CD53         | CD53 Molecule                                            | 0.02  | 0.19  | 9.31   | 28.51  | 2.41  | 1.17E-01 | 6.71 | 1.44E-08 | 1.63  | 4.68E-01 | EGA3-1 |
| ENSMMUG000000002463 | DRAM2        | DNA Damage Regulated Autophagy Modulator 2               | 9.23  | 8.01  | 18.37  | 12.89  | -0.71 | 3.70E-01 | 1.85 | 5.09E-03 | -0.33 | 8.46E-01 | EGA3-1 |
| ENSMMUG000000029348 | LOC693577    | 26S Protease Regulatory Subunit 10B                      | 4.31  | 4.05  | 13.81  | 17.41  | -0.46 | 6.39E-01 | 2.18 | 3.38E-03 | 0.51  | 7.71E-01 | EGA3-1 |
| ENSMMUG000000000476 | FMO5         | Flavin Containing Monooxygenase 5                        | 1.38  | 1.54  | 9.79   | 4.32   | -0.53 | 7.52E-01 | 2.88 | 1.96E-02 | 0.86  | 7.58E-01 | EGA3-1 |
| ENSMMUG000000009024 | CHD1L        | Chromodomain Helicase DNA Binding Protein 1 Like         | 1.77  | 1.47  | 6.28   | 3.23   | -0.26 | 8.26E-01 | 1.72 | 4.28E-02 | -0.04 | 9.91E-01 | EGA3-1 |
| ENSMMUG000000008218 | ADAMTSL4     | ADAMTS Like 4                                            | 0.06  | 0.33  | 2.37   | 1.50   | -0.65 | 8.12E-01 | 4.54 | 1.47E-02 | -4.36 | 7.60E-02 | EGA3-1 |
| ENSMMUG000000013166 | ZNF687       | Zinc Finger Protein 687                                  | 0.20  | 0.84  | 3.77   | 3.15   | 0.78  | 6.06E-01 | 2.50 | 3.92E-02 | 0.61  | 8.37E-01 | EGA3-1 |
| ENSMMUG000000009094 | MRPL9        | Mitochondrial Ribosomal Protein L9                       | 20.40 | 30.22 | 84.23  | 75.09  | 0.24  | 7.41E-01 | 2.17 | 1.92E-05 | -0.55 | 5.97E-01 | EGA3-1 |
| ENSMMUG000000004441 | S100A11      | S100 Calcium Binding Protein A11                         | 81.95 | 69.51 | 284.39 | 201.08 | 0.41  | 6.63E-01 | 1.69 | 1.89E-02 | 1.31  | 2.18E-01 | EGA3-1 |
| ENSMMUG000000005007 | SLC39A1      | Solute Carrier Family 39 Member 1                        | 2.31  | 4.31  | 19.54  | 22.98  | 0.18  | 8.97E-01 | 2.63 | 2.16E-03 | 1.02  | 5.22E-01 | EGA3-1 |
| ENSMMUG000000023364 | ATP8B2       | ATPase Phospholipid Transporting 8B2                     | 0.13  | 0.46  | 4.22   | 5.33   | 0.55  | 7.27E-01 | 4.66 | 2.19E-05 | 0.00  | 9.99E-01 | EGA3-1 |
| ENSMMUG000000008506 | MTX1         | Metaxin 1                                                | 0.51  | 0.66  | 2.64   | 3.46   | -1.26 | 4.11E-01 | 3.37 | 7.78E-03 | 1.51  | 5.11E-01 | EGA3-1 |
| ENSMMUG000000008507 | GBA          | Glucosylceramidase Beta                                  | 1.23  | 0.38  | 2.30   | 6.91   | -2.04 | 1.22E-01 | 4.30 | 2.26E-04 | 0.93  | 7.25E-01 | EGA3-1 |
| ENSMMUG000000018080 | DAP3         | Death Associated Protein 3                               | 4.98  | 10.66 | 19.41  | 21.55  | 1.03  | 8.91E-02 | 1.32 | 1.97E-02 | -0.07 | 9.74E-01 | EGA3-1 |
| ENSMMUG000000040660 | HDGF         | Heparin Binding Growth Factor                            | 7.95  | 4.82  | 19.30  | 21.54  | -0.31 | 7.65E-01 | 1.89 | 1.04E-02 | 0.31  | 8.75E-01 | EGA3-1 |
| ENSMMUG000000011342 | CFAP45       | Cilia And Flagella Associated Protein 45                 | 0.02  | 0.03  | 3.14   | 0.83   | 0.66  | 7.75E-01 | 7.73 | 1.32E-07 | -2.73 | 2.36E-01 | EGA3-1 |
| ENSMMUG000000040609 | TAGLN2       | Transgelin 2                                             | 3.73  | 1.80  | 14.82  | 18.11  | -0.67 | 4.95E-01 | 2.18 | 6.01E-03 | 0.39  | 8.52E-01 | EGA3-1 |
| ENSMMUG000000004520 | NDUFS2       | NADH:ubiquinone Oxidoreductase Core Subunit S2           | 5.76  | 11.17 | 31.57  | 32.61  | 0.75  | 4.05E-01 | 1.73 | 2.45E-02 | 0.16  | 9.53E-01 | EGA3-1 |
| ENSMMUG000000016206 | FCGR3        | Fc-gamma RIII                                            | 0.09  | 0.25  | 1.89   | 3.28   | 1.24  | 4.02E-01 | 2.81 | 2.39E-02 | 2.36  | 1.94E-01 | EGA3-1 |
| ENSMMUG000000041308 | HIST3H2A     | Histone Cluster 3, H2a                                   | 0.02  | 0.07  | 1.82   | 1.44   | 0.42  | 9.09E-01 | 4.64 | 4.21E-02 | -2.92 | 4.54E-01 | EGA3-1 |
| ENSMMUG000000021820 | PARP1        | Poly(ADP-ribose) Polymerase 1                            | 14.20 | 11.34 | 28.86  | 16.61  | -0.19 | 7.62E-01 | 1.21 | 6.00E-03 | -0.87 | 1.77E-01 | EGA3-1 |
| ENSMMUG000000007783 | IARS2        | Isoleucyl-tRNA Synthetase 2, Mitochondrial               | 5.81  | 8.47  | 17.27  | 25.58  | 0.12  | 9.02E-01 | 1.33 | 2.97E-02 | 0.57  | 6.35E-01 | EGA3-1 |
| ENSMMUG000000008722 | EPRS         | Glutamyl-prolyl-tRNA Synthetase                          | 33.47 | 22.14 | 40.16  | 42.51  | -0.55 | 1.94E-01 | 1.25 | 7.00E-04 | -0.50 | 4.46E-01 | EGA3-1 |
| ENSMMUG000000014167 | LOC106992350 | Estrogen-related Receptor Gamma-like                     | 0.04  | 0.04  | 0.53   | 1.04   | -0.45 | 6.99E-01 | 4.32 | 6.23E-08 | 0.71  | 6.92E-01 | EGA3-1 |
| ENSMMUG000000031430 | TATDN3       | TatD DNase Domain Containing 3                           | 0.72  | 0.21  | 1.02   | 0.31   | -2.56 | 1.10E-01 | 3.04 | 4.86E-02 | -3.57 | 7.85E-02 | EGA3-1 |
| ENSMMUG000000002141 | TMEM206      | Transmembrane Protein 206                                | 1.92  | 1.22  | 2.19   | 2.63   | -1.70 | 1.42E-01 | 2.22 | 4.16E-02 | -1.50 | 4.02E-01 | EGA3-1 |
| ENSMMUG000000019771 | PPP2R5A      | Protein Phosphatase 2 Regulatory Subunit B'alpha         | 2.47  | 3.86  | 12.54  | 20.20  | 0.63  | 4.72E-01 | 2.08 | 3.14E-03 | 0.19  | 9.32E-01 | EGA3-1 |
| ENSMMUG000000010174 | INTS7        | Integrator Complex Subunit 7                             | 4.97  | 4.51  | 10.45  | 4.25   | 0.16  | 8.48E-01 | 1.14 | 4.33E-02 | -1.02 | 2.09E-01 | EGA3-1 |
| ENSMMUG000000021591 | CTSE         | Cathepsin E                                              | 0.02  | 0.01  | 0.56   | 2.21   | -2.17 | 3.78E-01 | 6.42 | 8.97E-04 | 4.85  | 5.71E-02 | EGA3-1 |

|                     |           |                                                           |        |        |         |         |       |          |      |          |       |          |        |
|---------------------|-----------|-----------------------------------------------------------|--------|--------|---------|---------|-------|----------|------|----------|-------|----------|--------|
| ENSMMUG00000031372  | SNRPE     | Small Nuclear Ribonucleoprotein Polypeptide E             | 18.19  | 41.02  | 86.44   | 70.91   | 0.81  | 3.87E-01 | 1.62 | 4.77E-02 | -0.09 | 9.74E-01 | EGA3-1 |
| ENSMMUG00000016477  |           |                                                           | 2.77   | 3.87   | 14.26   | 6.72    | -0.50 | 6.92E-01 | 2.64 | 4.63E-03 | -0.56 | 8.05E-01 | EGA3-1 |
| ENSMMUG00000031357  | ARL8A     | ADP Ribosylation Factor Like GTPase 8A                    | 0.63   | 1.07   | 6.77    | 8.46    | 0.43  | 7.88E-01 | 2.72 | 1.53E-02 | 1.90  | 2.72E-01 | EGA3-1 |
| ENSMMUG00000001929  | ELF3      | E74 Like ETS Transcription Factor 3                       | 0.01   | 0.05   | 4.68    | 16.33   | 2.08  | 8.83E-02 | 5.96 | 3.50E-10 | 1.71  | 2.78E-01 | EGA3-1 |
| ENSMMUG00000009085  | C1H1orf27 | Protein Odr-4 Homolog                                     | 6.15   | 4.01   | 11.20   | 6.09    | -1.00 | 1.57E-01 | 1.37 | 3.83E-02 | -1.52 | 8.11E-02 | EGA3-1 |
| ENSMMUG00000009081  | TPR       | Translocated Promoter Region, Nuclear Basket Protein      | 25.64  | 37.41  | 75.92   | 48.56   | 0.36  | 5.26E-01 | 1.40 | 1.61E-03 | -0.99 | 1.18E-01 | EGA3-1 |
| ENSMMUG00000005634  |           |                                                           | 0.31   | 0.00   | 0.50    | 0.74    | -4.95 | 5.99E-02 | 7.23 | 3.20E-03 | -0.29 | 9.74E-01 | EGA3-1 |
| ENSMMUG00000012051  | ACBD6     | Acyl-CoA Binding Domain Containing 6                      | 1.88   | 7.25   | 27.24   | 36.34   | 1.31  | 1.61E-01 | 2.52 | 2.36E-03 | 0.63  | 7.41E-01 | EGA3-1 |
| ENSMMUG00000003768  | SOAT1     | Sterol O-acyltransferase 1                                | 32.21  | 14.31  | 110.10  | 51.98   | -1.13 | 1.21E-01 | 3.55 | 1.44E-08 | -1.31 | 1.83E-01 | EGA3-1 |
| ENSMMUG000000042908 |           |                                                           | 0.01   | 0.20   | 0.96    | 5.03    | 3.14  | 1.25E-01 | 3.82 | 3.22E-02 | 0.24  | 9.71E-01 | EGA3-1 |
| ENSMMUG000000039365 |           |                                                           | 3.09   | 1.00   | 11.40   | 9.03    | -1.67 | 2.67E-01 | 3.60 | 5.88E-03 | 0.22  | 9.64E-01 | EGA3-1 |
| ENSMMUG00000016581  | METTL18   | Methyltransferase Like 18                                 | 5.79   | 7.85   | 11.14   | 7.10    | -0.47 | 7.12E-01 | 1.92 | 4.84E-02 | -0.54 | 8.12E-01 | EGA3-1 |
| ENSMMUG00000000565  | UCK2      | Uridine-cytidine Kinase 2                                 | 30.19  | 53.00  | 93.17   | 57.86   | 0.56  | 3.28E-01 | 1.17 | 1.76E-02 | -0.71 | 3.87E-01 | EGA3-1 |
| ENSMMUG000000005247 | EGLN1     | Egl-9 Family Hypoxia Inducible Factor 1                   | 0.65   | 0.95   | 4.11    | 3.23    | -0.13 | 9.05E-01 | 3.10 | 4.24E-06 | -0.85 | 5.11E-01 | EGA3-1 |
| ENSMMUG00000004566  | ZNF124    | Zinc Finger Protein 124                                   | 0.37   | 0.48   | 1.64    | 2.77    | -0.26 | 8.36E-01 | 2.31 | 7.22E-03 | 2.17  | 6.01E-02 | EGA3-1 |
| ENSMMUG000000039874 | ZNF717    | Zinc Finger Protein 717                                   | 1.13   | 2.22   | 9.74    | 2.87    | 0.71  | 6.01E-01 | 3.12 | 2.81E-03 | -2.33 | 1.18E-01 | EGA3-1 |
| ENSMMUG000000031115 |           |                                                           | 6.45   | 6.97   | 80.77   | 204.45  | -0.53 | 5.22E-01 | 4.28 | 1.83E-12 | 0.99  | 3.61E-01 | EGA3-1 |
| ENSMMUG000000020024 | NIT2      | Nitrilase Family Member 2                                 | 0.90   | 0.83   | 6.80    | 18.83   | -0.07 | 9.71E-01 | 3.82 | 1.73E-03 | 1.08  | 6.79E-01 | EGA3-1 |
| ENSMMUG000000020025 | TOMM70    | Translocase Of Outer Mitochondrial Membrane 70            | 19.28  | 20.28  | 41.52   | 26.84   | 0.09  | 8.88E-01 | 1.07 | 7.27E-03 | -0.88 | 1.18E-01 | EGA3-1 |
| ENSMMUG00000017780  | TRMT10C   | TRNA Methyltransferase 10C, Mitochondrial RNase P Subunit | 11.45  | 13.95  | 34.40   | 22.27   | -0.33 | 6.68E-01 | 1.49 | 9.91E-03 | 0.01  | 9.97E-01 | EGA3-1 |
| ENSMMUG00000000696  |           |                                                           | 0.86   | 0.60   | 3.64    | 7.53    | -1.92 | 1.90E-01 | 3.34 | 9.94E-03 | 3.14  | 6.91E-02 | EGA3-1 |
| ENSMMUG000000032033 | LOC711695 | 10 KDa Heat Shock Protein, Mitochondrial Pseudogene       | 226.11 | 128.22 | 1484.19 | 2291.19 | -0.96 | 1.78E-01 | 3.66 | 7.67E-10 | 0.44  | 7.69E-01 | EGA3-1 |
| ENSMMUG00000001592  | NDUFB4    | NADH:ubiquinone Oxidoreductase Subunit B4                 | 11.52  | 21.39  | 89.55   | 107.97  | 0.81  | 4.16E-01 | 2.39 | 3.72E-03 | -0.10 | 9.73E-01 | EGA3-1 |
| ENSMMUG00000001045  | IQCB1     | IQ Motif Containing B1                                    | 16.68  | 23.23  | 93.39   | 45.82   | -0.69 | 4.97E-01 | 2.62 | 1.06E-03 | -0.33 | 8.88E-01 | EGA3-1 |
| ENSMMUG00000007696  | PDIA5     | Protein Disulfide Isomerase Family A Member 5             | 2.11   | 1.02   | 3.41    | 4.63    | -2.05 | 7.82E-02 | 2.32 | 3.83E-02 | 0.61  | 8.19E-01 | EGA3-1 |
| ENSMMUG000000032009 | UMPS      | Uridine Monophosphate Synthetase                          | 6.68   | 6.01   | 14.04   | 15.80   | -0.34 | 6.55E-01 | 1.52 | 7.69E-03 | -0.56 | 6.23E-01 | EGA3-1 |
| ENSMMUG000000032005 | HEG1      | Heart Development Protein With EGF Like Domains 1         | 1.96   | 2.60   | 8.20    | 14.06   | -0.75 | 4.72E-01 | 2.16 | 1.11E-02 | 1.30  | 3.46E-01 | EGA3-1 |
| ENSMMUG00000011613  |           |                                                           | 0.29   | 0.97   | 6.09    | 6.74    | 0.97  | 4.62E-01 | 3.94 | 7.45E-05 | 0.06  | 9.87E-01 | EGA3-1 |
| ENSMMUG00000004195  |           |                                                           | 3.65   | 1.31   | 9.05    | 12.21   | -1.66 | 7.92E-02 | 2.91 | 7.21E-04 | -0.37 | 8.80E-01 | EGA3-1 |
| ENSMMUG00000018321  | RPN1      | Ribophorin I                                              | 7.54   | 6.58   | 20.98   | 21.75   | -0.39 | 6.69E-01 | 2.24 | 8.52E-04 | -0.67 | 6.31E-01 | EGA3-1 |
| ENSMMUG000000022491 |           |                                                           | 0.43   | 1.46   | 8.76    | 3.65    | 0.08  | 9.75E-01 | 3.34 | 3.27E-02 | -0.94 | 8.05E-01 | EGA3-1 |
| ENSMMUG00000003943  | SETD5     | SET Domain Containing 5                                   | 15.18  | 25.68  | 56.84   | 49.25   | 0.70  | 1.80E-01 | 1.11 | 1.88E-02 | 0.22  | 8.58E-01 | EGA3-1 |
| ENSMMUG000000008616 |           |                                                           | 6.83   | 4.96   | 15.83   | 13.88   | -1.34 | 1.92E-01 | 2.42 | 8.36E-03 | -1.30 | 4.05E-01 | EGA3-1 |
| ENSMMUG000000006229 | ACOX2     | Acyl-CoA Oxidase 2                                        | 0.16   | 0.02   | 3.08    | 6.92    | -1.09 | 6.53E-01 | 5.13 | 2.92E-03 | 2.29  | 4.31E-01 | EGA3-1 |
| ENSMMUG00000000706  | FLNB      | Filamin B                                                 | 9.39   | 8.24   | 44.51   | 77.20   | -0.39 | 5.86E-01 | 2.60 | 8.78E-07 | 0.14  | 9.38E-01 | EGA3-1 |
| ENSMMUG00000019267  | IL17RB    | Interleukin 17 Receptor B                                 | 0.25   | 2.12   | 4.67    | 2.59    | 1.52  | 3.83E-01 | 3.04 | 4.43E-02 | -2.26 | 3.40E-01 | EGA3-1 |
| ENSMMUG00000019266  | CHDH      | Choline Dehydrogenase                                     | 0.06   | 0.31   | 12.75   | 13.59   | 1.69  | 1.98E-01 | 5.54 | 3.05E-07 | 0.59  | 8.39E-01 | EGA3-1 |
| ENSMMUG00000012511  | GNL3      | G Protein Nucleolar 3                                     | 17.99  | 44.48  | 109.55  | 75.14   | 0.98  | 1.53E-01 | 1.49 | 1.74E-02 | -0.49 | 7.19E-01 | EGA3-1 |
| ENSMMUG000000005452 | AMT       | Aminomethyltransferase                                    | 0.18   | 1.00   | 3.85    | 9.55    | 1.93  | 1.95E-01 | 2.79 | 4.10E-02 | 0.06  | 9.92E-01 | EGA3-1 |
| ENSMMUG00000010062  | SHISA5    | Shisa Family Member 5                                     | 13.49  | 6.64   | 69.50   | 191.24  | -0.14 | 9.16E-01 | 2.47 | 3.78E-03 | 1.38  | 3.19E-01 | EGA3-1 |
| ENSMMUG00000010058  | ATRIP     | ATR Interacting Protein                                   | 1.72   | 1.37   | 4.54    | 6.26    | -1.33 | 1.98E-01 | 2.64 | 3.86E-03 | -0.25 | 9.32E-01 | EGA3-1 |

|                    |              |                                                               |       |       |        |        |       |          |      |          |       |          |        |
|--------------------|--------------|---------------------------------------------------------------|-------|-------|--------|--------|-------|----------|------|----------|-------|----------|--------|
| ENSMMUG00000021918 | GOLGA4       | Golgin A4                                                     | 29.20 | 29.90 | 52.33  | 47.79  | -0.02 | 9.73E-01 | 0.99 | 1.46E-02 | -0.13 | 9.15E-01 | EGA3-1 |
| ENSMMUG00000047517 |              |                                                               | 2.19  | 1.33  | 5.84   | 4.29   | -1.56 | 2.15E-01 | 2.69 | 1.84E-02 | 0.36  | 9.14E-01 | EGA3-1 |
| ENSMMUG00000009746 | NDUFB5       | NADH:ubiquinone Oxidoreductase Subunit B5                     | 5.62  | 5.38  | 17.73  | 28.05  | -0.41 | 7.35E-01 | 1.99 | 2.52E-02 | 0.38  | 8.72E-01 | EGA3-1 |
| ENSMMUG00000009744 | MRPL47       | Mitochondrial Ribosomal Protein L47                           | 4.01  | 9.41  | 30.81  | 21.04  | 0.79  | 4.52E-01 | 2.31 | 7.75E-03 | -0.08 | 9.81E-01 | EGA3-1 |
| ENSMMUG00000004079 | MFN1         | Mitofusin 1                                                   | 13.36 | 9.33  | 26.85  | 22.78  | -0.60 | 3.54E-01 | 1.78 | 9.65E-04 | 0.14  | 9.42E-01 | EGA3-1 |
| ENSMMUG00000042887 |              |                                                               | 6.03  | 5.90  | 23.74  | 17.86  | -0.23 | 8.85E-01 | 2.47 | 1.74E-02 | -0.42 | 8.82E-01 | EGA3-1 |
| ENSMMUG00000042779 | LOC106996987 | Thioredoxin                                                   | 32.47 | 64.65 | 217.82 | 221.27 | 0.07  | 9.53E-01 | 2.45 | 7.85E-04 | 0.21  | 9.31E-01 | EGA3-1 |
| ENSMMUG00000047426 | LOC106996998 | Thioredoxin Pseudogene                                        | 27.02 | 54.40 | 178.82 | 185.48 | 0.13  | 9.12E-01 | 2.35 | 1.82E-03 | 0.26  | 9.09E-01 | EGA3-1 |
| ENSMMUG00000003540 | PPM1L        | Protein Phosphatase, Mg2+/Mn2+ Dependent 1L                   | 0.05  | 0.14  | 1.37   | 1.77   | 2.94  | 1.68E-01 | 4.31 | 1.55E-02 | 0.22  | 9.74E-01 | EGA3-1 |
| ENSMMUG00000023335 | RNF13        | Ring Finger Protein 13                                        | 10.78 | 9.40  | 20.54  | 11.18  | -0.48 | 5.69E-01 | 1.58 | 2.05E-02 | -0.92 | 4.26E-01 | EGA3-1 |
| ENSMMUG00000009036 | ARHGEF26     | Rho Guanine Nucleotide Exchange Factor 26                     | 1.19  | 1.80  | 2.47   | 2.74   | -1.55 | 2.03E-01 | 2.30 | 4.02E-02 | -0.90 | 7.00E-01 | EGA3-1 |
| ENSMMUG00000041053 |              |                                                               | 3.81  | 7.45  | 13.93  | 19.33  | 0.55  | 2.96E-01 | 1.27 | 4.95E-03 | 0.33  | 7.50E-01 | EGA3-1 |
| ENSMMUG00000023510 | MFSD1        | Major Facilitator Superfamily Domain Containing 1             | 2.48  | 1.73  | 4.56   | 5.78   | -0.75 | 3.34E-01 | 1.70 | 1.05E-02 | 0.79  | 5.13E-01 | EGA3-1 |
| ENSMMUG00000046254 | SATB2        | SATB Homeobox 2                                               | 3.12  | 3.76  | 18.96  | 14.08  | 0.13  | 8.94E-01 | 2.30 | 6.95E-05 | -0.64 | 5.83E-01 | EGA3-1 |
| ENSMMUG00000016547 | MOB4         | MOB Family Member 4, Phocein                                  | 49.06 | 53.31 | 335.63 | 449.23 | -0.30 | 7.50E-01 | 3.23 | 6.33E-07 | -0.20 | 9.23E-01 | EGA3-1 |
| ENSMMUG00000010489 | LOC693438    | Heat Shock 60kDa Protein 1 (chaperonin)-like                  | 27.93 | 43.39 | 298.29 | 499.78 | 0.50  | 5.13E-01 | 3.05 | 1.53E-07 | 0.60  | 6.28E-01 | EGA3-1 |
| ENSMMUG00000003048 | MRPS22       | Mitochondrial Ribosomal Protein S22                           | 24.49 | 29.58 | 65.07  | 50.43  | -0.13 | 8.98E-01 | 1.75 | 6.88E-03 | -0.86 | 4.50E-01 | EGA3-1 |
| ENSMMUG00000008664 | FAIM         | Fas Apoptotic Inhibitory Molecule                             | 0.10  | 0.16  | 1.25   | 1.40   | -0.49 | 8.58E-01 | 3.74 | 4.28E-02 | 1.70  | 6.37E-01 | EGA3-1 |
| ENSMMUG00000013527 |              |                                                               | 5.27  | 10.40 | 23.13  | 20.10  | 0.77  | 3.48E-01 | 1.72 | 1.38E-02 | -0.99 | 4.00E-01 | EGA3-1 |
| ENSMMUG00000021694 |              |                                                               | 0.46  | 0.11  | 12.00  | 22.95  | -1.35 | 1.64E-01 | 6.66 | 1.45E-17 | 1.31  | 3.40E-01 | EGA3-1 |
| ENSMMUG00000011270 | RYK          | Receptor-like Tyrosine Kinase                                 | 0.78  | 0.96  | 4.66   | 8.75   | 0.44  | 7.00E-01 | 2.43 | 3.36E-03 | 1.03  | 4.92E-01 | EGA3-1 |
| ENSMMUG00000047917 |              |                                                               | 16.36 | 8.79  | 32.99  | 32.34  | -0.66 | 4.69E-01 | 1.83 | 1.47E-02 | 0.45  | 8.03E-01 | EGA3-1 |
| ENSMMUG00000023776 | TBC1D5       | TBC1 Domain Family Member 5                                   | 1.13  | 1.50  | 9.79   | 9.97   | 0.96  | 3.57E-01 | 2.42 | 5.93E-03 | 0.29  | 9.12E-01 | EGA3-1 |
| ENSMMUG00000014069 | PDCD6IP      | Programmed Cell Death 6 Interacting Protein                   | 7.37  | 13.73 | 25.52  | 36.24  | 0.66  | 1.56E-01 | 1.14 | 6.27E-03 | 0.16  | 8.93E-01 | EGA3-1 |
| ENSMMUG00000014905 | ST6GAL1      | ST6 Beta-galactoside Alpha-2,6-sialyltransferase 1            | 0.76  | 1.22  | 7.64   | 2.25   | 1.31  | 3.30E-01 | 3.60 | 1.35E-03 | -1.77 | 3.43E-01 | EGA3-1 |
| ENSMMUG00000005298 | MAN2B2       | Mannosidase Alpha Class 2B Member 2                           | 0.25  | 0.50  | 1.94   | 1.37   | 0.13  | 9.53E-01 | 2.80 | 4.59E-02 | 0.83  | 8.02E-01 | EGA3-1 |
| ENSMMUG00000016999 | KIAA0232     | KIAA0232 Ortholog                                             | 0.85  | 1.13  | 4.79   | 6.71   | 0.29  | 8.02E-01 | 2.16 | 6.32E-03 | 0.51  | 7.89E-01 | EGA3-1 |
| ENSMMUG00000022027 | BOD1L1       | Biorientation Of Chromosomes In Cell Division 1 Like 1        | 20.83 | 26.03 | 41.63  | 40.58  | 0.25  | 6.01E-01 | 0.85 | 2.50E-02 | -0.01 | 9.92E-01 | EGA3-1 |
| ENSMMUG00000019784 | SEPSECS      | Sep (O-phosphoserine) TRNA:Sec (selenocysteine) TRNA Synthase | 0.70  | 0.46  | 1.27   | 3.20   | -1.46 | 1.49E-01 | 1.86 | 4.87E-02 | 2.31  | 5.44E-02 | EGA3-1 |
| ENSMMUG00000045964 |              |                                                               | 0.10  | 0.34  | 4.35   | 3.08   | 0.86  | 7.02E-01 | 4.96 | 5.55E-04 | 0.85  | 8.13E-01 | EGA3-1 |
| ENSMMUG00000001485 | TMEM150C     | Transmembrane Protein 150C                                    | 0.07  | 0.06  | 5.75   | 7.68   | 1.53  | 1.46E-01 | 7.50 | 1.42E-22 | 0.00  | 9.99E-01 | EGA3-1 |
| ENSMMUG00000011639 | BMP2K        | BMP2 Inducible Kinase                                         | 28.36 | 22.14 | 38.46  | 26.26  | -0.54 | 3.39E-01 | 1.04 | 3.63E-02 | -0.52 | 5.78E-01 | EGA3-1 |
| ENSMMUG00000011859 |              |                                                               | 1.41  | 1.88  | 9.62   | 10.30  | -0.36 | 7.72E-01 | 3.12 | 1.98E-04 | -0.70 | 7.11E-01 | EGA3-1 |
| ENSMMUG00000020919 | SHROOM3      | Shroom Family Member 3                                        | 2.71  | 1.93  | 5.69   | 5.32   | -1.31 | 2.51E-01 | 2.26 | 2.62E-02 | -1.04 | 5.89E-01 | EGA3-1 |
| ENSMMUG00000017501 | NAAA         | N-acylethanolamine Acid Amidase                               | 0.09  | 0.30  | 1.40   | 0.73   | 1.54  | 4.76E-01 | 4.25 | 1.44E-02 | -0.68 | 8.90E-01 | EGA3-1 |

|                    |            |                                                                                                                 |       |       |        |        |       |          |      |          |       |          |        |
|--------------------|------------|-----------------------------------------------------------------------------------------------------------------|-------|-------|--------|--------|-------|----------|------|----------|-------|----------|--------|
| ENSMMUG0000000789  | LOC705226  | Mitochondrial Inner Membrane Protein COX18                                                                      | 0.08  | 0.31  | 1.98   | 1.87   | 1.15  | 3.90E-01 | 3.62 | 7.37E-04 | 0.86  | 7.27E-01 | EGA3-1 |
| ENSMMUG0000004465  | RUFY3      | RUN And FYVE Domain Containing 3                                                                                | 3.64  | 3.01  | 10.18  | 11.02  | -0.89 | 3.11E-01 | 2.54 | 5.24E-04 | -0.44 | 8.12E-01 | EGA3-1 |
| ENSMMUG00000019386 |            |                                                                                                                 | 0.01  | 0.58  | 2.85   | 2.21   | 2.91  | 1.95E-01 | 4.01 | 3.15E-02 | 2.12  | 5.31E-01 | EGA3-1 |
| ENSMMUG0000001918  | TMEM165    | Transmembrane Protein 165                                                                                       | 1.03  | 2.44  | 5.26   | 7.30   | -0.29 | 8.44E-01 | 2.80 | 4.63E-03 | 0.27  | 9.34E-01 | EGA3-1 |
| ENSMMUG00000010113 |            |                                                                                                                 | 0.57  | 0.29  | 1.83   | 7.01   | -0.25 | 9.30E-01 | 3.91 | 2.56E-02 | 1.85  | 5.54E-01 | EGA3-1 |
| ENSMMUG00000019041 | HSD17B11   | Hydroxysteroid 17-beta Dehydrogenase 11                                                                         | 0.32  | 0.36  | 3.65   | 4.29   | -0.07 | 9.73E-01 | 4.56 | 2.56E-04 | 2.85  | 1.18E-01 | EGA3-1 |
| ENSMMUG00000022242 | SMARCAD1   | SWI/SNF-related, Matrix-associated Actin-dependent Regulator Of Chromatin, Subfamily A, Containing DEAD/H Box 1 | 9.01  | 9.33  | 29.46  | 20.37  | -0.20 | 7.66E-01 | 1.90 | 2.90E-05 | -0.19 | 8.87E-01 | EGA3-1 |
| ENSMMUG00000040944 |            |                                                                                                                 | 2.86  | 1.24  | 3.40   | 4.86   | -2.60 | 7.41E-02 | 3.15 | 2.35E-02 | 0.87  | 7.87E-01 | EGA3-1 |
| ENSMMUG00000015759 | AIMP1      | Aminoacyl TRNA Synthetase Complex Interacting Multifunctional Protein 1                                         | 5.00  | 21.80 | 69.15  | 60.68  | 1.59  | 5.11E-02 | 1.80 | 2.15E-02 | 0.19  | 9.43E-01 | EGA3-1 |
| ENSMMUG00000011902 |            |                                                                                                                 | 3.79  | 4.97  | 13.91  | 15.73  | -1.32 | 2.19E-01 | 2.60 | 5.76E-03 | 1.34  | 4.08E-01 | EGA3-1 |
| ENSMMUG00000033109 | MIR302D    | MicroRNA 302d                                                                                                   | 0.19  | 0.00  | 31.63  | 58.95  | -0.16 | 9.61E-01 | 5.32 | 4.17E-03 | 3.44  | 1.89E-01 | EGA3-1 |
| ENSMMUG00000008587 | CAMK2D     | Calcium/calmodulin Dependent Protein Kinase II Delta                                                            | 0.09  | 0.23  | 0.94   | 4.77   | -2.37 | 1.16E-01 | 5.45 | 3.11E-05 | 2.57  | 1.90E-01 | EGA3-1 |
| ENSMMUG00000003320 | PLK4       | Polo Like Kinase 4                                                                                              | 1.32  | 1.91  | 18.10  | 10.20  | -0.41 | 7.36E-01 | 3.82 | 6.32E-06 | 0.29  | 9.10E-01 | EGA3-1 |
| ENSMMUG00000040747 | C5H4orf33  | Chromosome 5 Open Reading Frame, Human C4orf33                                                                  | 6.63  | 10.81 | 20.70  | 13.96  | 0.74  | 6.01E-02 | 0.88 | 1.97E-02 | -0.36 | 6.23E-01 | EGA3-1 |
| ENSMMUG00000007216 |            |                                                                                                                 | 1.87  | 3.12  | 15.91  | 25.97  | 0.23  | 8.06E-01 | 2.86 | 3.46E-06 | 0.60  | 6.53E-01 | EGA3-1 |
| ENSMMUG00000004433 | ABCE1      | ATP Binding Cassette Subfamily E Member 1                                                                       | 27.71 | 25.46 | 46.65  | 45.27  | -0.50 | 5.04E-01 | 1.26 | 4.30E-02 | -0.21 | 9.06E-01 | EGA3-1 |
| ENSMMUG00000042788 | LOC703336  | Guanine Nucleotide-binding Protein G(I)/G(S)/G(O) Subunit Gamma-5                                               | 11.39 | 9.22  | 14.81  | 19.34  | -1.07 | 1.42E-01 | 1.48 | 3.15E-02 | -0.16 | 9.47E-01 | EGA3-1 |
| ENSMMUG00000010581 | RAPGEF2    | Rap Guanine Nucleotide Exchange Factor 2                                                                        | 5.38  | 3.00  | 8.95   | 11.81  | -0.82 | 2.60E-01 | 1.40 | 3.23E-02 | 0.82  | 4.70E-01 | EGA3-1 |
| ENSMMUG00000012701 | SH3RF1     | SH3 Domain Containing Ring Finger 1                                                                             | 1.26  | 0.76  | 7.48   | 1.80   | -1.09 | 3.58E-01 | 2.89 | 3.62E-03 | -1.42 | 4.08E-01 | EGA3-1 |
| ENSMMUG00000015748 | WWC2       | WW And C2 Domain Containing 2                                                                                   | 15.09 | 12.99 | 33.99  | 13.10  | -0.70 | 4.71E-01 | 1.77 | 3.05E-02 | -1.00 | 4.81E-01 | EGA3-1 |
| ENSMMUG00000030008 | CLDN22     | Claudin 22                                                                                                      | 0.10  | 0.10  | 4.21   | 1.73   | -0.83 | 7.51E-01 | 4.54 | 1.46E-02 | 0.31  | 9.64E-01 | EGA3-1 |
| ENSMMUG00000008880 |            |                                                                                                                 | 1.12  | 0.76  | 1.03   | 1.68   | -2.42 | 8.49E-02 | 2.82 | 3.85E-02 | 0.08  | 9.87E-01 | EGA3-1 |
| ENSMMUG00000005272 | C3H21orf33 | Chromosome 3 Open Reading Frame, Human C21orf33                                                                 | 1.15  | 2.57  | 10.62  | 12.27  | -1.20 | 3.48E-01 | 4.88 | 1.78E-06 | 0.14  | 9.72E-01 | EGA3-1 |
| ENSMMUG00000006075 | HMG1       | High Mobility Group Nucleosome Binding Domain 1                                                                 | 88.63 | 56.15 | 199.22 | 177.98 | -0.68 | 3.23E-01 | 2.12 | 1.97E-04 | -0.57 | 6.31E-01 | EGA3-1 |
| ENSMMUG00000015504 | ATP5O      | ATP Synthase, H+ Transporting, Mitochondrial F1 Complex, O Subunit                                              | 15.21 | 6.80  | 64.88  | 78.31  | -0.90 | 2.64E-01 | 3.38 | 3.40E-07 | 0.17  | 9.43E-01 | EGA3-1 |
| ENSMMUG00000003701 | DONSON     | Downstream Neighbor Of SON                                                                                      | 6.67  | 2.84  | 9.47   | 10.13  | -1.28 | 1.56E-01 | 1.95 | 1.79E-02 | -0.66 | 7.07E-01 | EGA3-1 |
| ENSMMUG00000017605 | MRPL39     | Mitochondrial Ribosomal Protein L39                                                                             | 0.04  | 0.01  | 5.74   | 0.61   | -1.16 | 7.20E-01 | 7.01 | 1.87E-03 | -1.51 | 7.71E-01 | EGA3-1 |
| ENSMMUG00000044086 |            |                                                                                                                 | 0.10  | 0.16  | 1.20   | 3.80   | -1.11 | 5.99E-01 | 4.51 | 4.80E-03 | 0.43  | 9.25E-01 | EGA3-1 |
| ENSMMUG00000009917 | MDH2       | Malate Dehydrogenase 2                                                                                          | 5.76  | 9.15  | 41.32  | 44.37  | 0.89  | 2.25E-01 | 2.57 | 3.27E-05 | -0.29 | 8.68E-01 | EGA3-1 |
| ENSMMUG00000044653 | CLDN4      | Claudin 4                                                                                                       | 0.03  | 0.07  | 20.11  | 54.36  | 1.46  | 4.84E-01 | 4.83 | 1.56E-03 | 2.99  | 1.73E-01 | EGA3-1 |

|                    |              |                                                                                       |       |       |        |        |       |          |      |          |       |          |        |
|--------------------|--------------|---------------------------------------------------------------------------------------|-------|-------|--------|--------|-------|----------|------|----------|-------|----------|--------|
| ENSMMUG00000015272 | CCT6A        | Chaperonin Containing TCP1 Subunit 6A                                                 | 16.20 | 38.17 | 64.84  | 58.44  | 0.79  | 7.33E-02 | 1.09 | 8.43E-03 | 0.09  | 9.51E-01 | EGA3-1 |
| ENSMMUG00000019992 | GRB10        | Growth Factor Receptor Bound Protein 10                                               | 5.96  | 4.72  | 13.57  | 20.60  | -0.42 | 4.77E-01 | 1.65 | 4.19E-04 | 0.40  | 6.96E-01 | EGA3-1 |
| ENSMMUG00000019393 | TNS3         | Tensin 3                                                                              | 0.94  | 0.99  | 5.16   | 7.35   | 0.03  | 9.85E-01 | 2.45 | 7.29E-03 | 0.55  | 8.06E-01 | EGA3-1 |
| ENSMMUG0000002426  | MYL7         | Myosin Light Chain 7                                                                  | 0.02  | 0.00  | 2.92   | 1.67   | -2.79 | 2.50E-01 | 4.88 | 2.36E-02 | 2.32  | 5.23E-01 | EGA3-1 |
| ENSMMUG0000002411  | DBNL         | Drebrin Like                                                                          | 1.19  | 1.28  | 5.81   | 5.24   | -0.37 | 8.30E-01 | 2.76 | 2.15E-02 | -0.06 | 9.91E-01 | EGA3-1 |
| ENSMMUG00000040669 | LOC693813    | NADH Dehydrogenase [ubiquinone] 1 Beta Subcomplex Subunit 8, Mitochondrial Pseudogene | 2.91  | 1.01  | 12.84  | 15.62  | -1.67 | 1.51E-01 | 3.58 | 3.86E-04 | 1.78  | 2.66E-01 | EGA3-1 |
| ENSMMUG00000023230 | SNX10        | Sorting Nexin 10                                                                      | 0.24  | 0.38  | 1.09   | 1.41   | 0.00  | 1.00E+00 | 2.96 | 2.16E-02 | -0.10 | 9.84E-01 | EGA3-1 |
| ENSMMUG00000019983 | IL6          | Interleukin 6                                                                         | 0.02  | 0.22  | 14.41  | 5.87   | -0.13 | 9.57E-01 | 7.16 | 1.68E-07 | 0.17  | 9.74E-01 | EGA3-1 |
| ENSMMUG0000002987  | RAPGEF5      | Rap Guanine Nucleotide Exchange Factor 5                                              | 0.21  | 0.49  | 5.54   | 7.71   | 1.04  | 4.35E-01 | 3.60 | 7.55E-04 | 1.10  | 6.14E-01 | EGA3-1 |
| ENSMMUG00000008632 |              |                                                                                       | 8.23  | 6.53  | 33.02  | 72.63  | -0.14 | 9.14E-01 | 2.13 | 1.21E-02 | 1.56  | 2.19E-01 | EGA3-1 |
| ENSMMUG00000005159 | TMEM106B     | Transmembrane Protein 106B                                                            | 0.48  | 0.83  | 3.35   | 3.57   | 1.30  | 3.15E-01 | 3.11 | 3.90E-03 | 1.90  | 2.56E-01 | EGA3-1 |
| ENSMMUG00000020894 | NDUFA4       | NDUFA4, Mitochondrial Complex Associated                                              | 33.22 | 53.17 | 205.15 | 194.63 | 0.58  | 4.24E-01 | 2.25 | 1.04E-04 | -0.01 | 9.97E-01 | EGA3-1 |
| ENSMMUG00000038690 | C1GALT1      | Core 1 Synthase, Glycoprotein-N-acetylgalactosamine 3-beta-galactosyltransferase 1    | 1.46  | 6.17  | 16.20  | 5.20   | 1.61  | 5.54E-02 | 2.14 | 6.88E-03 | -1.78 | 1.09E-01 | EGA3-1 |
| ENSMMUG0000002364  | AKAP9        | A-kinase Anchoring Protein 9                                                          | 7.77  | 4.69  | 20.97  | 22.09  | -0.81 | 2.63E-01 | 2.42 | 5.70E-05 | -0.28 | 8.67E-01 | EGA3-1 |
| ENSMMUG00000038674 |              |                                                                                       | 0.31  | 0.74  | 1.35   | 1.07   | 0.01  | 9.96E-01 | 2.57 | 4.48E-04 | -0.65 | 6.89E-01 | EGA3-1 |
| ENSMMUG00000040007 | LOC702392    | Peroxisome Biogenesis Factor 1                                                        | 0.94  | 1.37  | 3.20   | 5.75   | 0.02  | 9.85E-01 | 1.39 | 2.62E-02 | 0.20  | 9.13E-01 | EGA3-1 |
| ENSMMUG00000019157 | ASNS         | Asparagine Synthetase (glutamine-hydrolyzing)                                         | 5.57  | 2.42  | 21.96  | 16.51  | -1.34 | 1.45E-01 | 3.92 | 6.05E-07 | -1.96 | 8.34E-02 | EGA3-1 |
| ENSMMUG00000003429 | PMPCB        | Peptidase, Mitochondrial Processing Beta Subunit                                      | 6.65  | 4.67  | 31.27  | 43.39  | -0.72 | 4.30E-01 | 3.26 | 5.94E-06 | 0.02  | 9.93E-01 | EGA3-1 |
| ENSMMUG00000022732 | SRPK2        | SRSF Protein Kinase 2                                                                 | 4.76  | 9.17  | 27.55  | 13.75  | 0.67  | 3.22E-01 | 1.85 | 1.19E-03 | -1.35 | 9.12E-02 | EGA3-1 |
| ENSMMUG00000030218 | BCAP29       | B-cell Receptor Associated Protein 29                                                 | 4.40  | 5.38  | 11.11  | 5.29   | -1.08 | 2.87E-01 | 2.72 | 1.52E-03 | 0.32  | 9.00E-01 | EGA3-1 |
| ENSMMUG00000006564 | DLD          | Dihydrolipoamide Dehydrogenase                                                        | 25.62 | 16.77 | 71.25  | 79.26  | -0.61 | 3.39E-01 | 2.18 | 2.92E-05 | 0.37  | 7.71E-01 | EGA3-1 |
| ENSMMUG00000006567 | LAMB1        | Laminin Subunit Beta 1                                                                | 8.11  | 5.65  | 20.85  | 69.63  | -0.45 | 6.03E-01 | 2.01 | 2.75E-03 | 1.56  | 9.51E-02 | EGA3-1 |
| ENSMMUG00000006784 | CAPZA2       | Capping Actin Protein Of Muscle Z-line Alpha Subunit 2                                | 0.90  | 1.77  | 10.49  | 14.91  | 0.99  | 3.43E-01 | 2.33 | 8.74E-03 | 1.16  | 4.57E-01 | EGA3-1 |
| ENSMMUG00000046401 |              |                                                                                       | 5.76  | 4.48  | 9.90   | 9.86   | -0.64 | 5.77E-01 | 1.87 | 4.47E-02 | 0.54  | 8.05E-01 | EGA3-1 |
| ENSMMUG00000023310 | TSPAN12      | Tetraspanin 12                                                                        | 0.31  | 0.03  | 0.77   | 1.56   | -3.82 | 9.55E-02 | 4.29 | 4.98E-02 | 3.41  | 2.96E-01 | EGA3-1 |
| ENSMMUG00000010664 | GPR37        | G Protein-coupled Receptor 37                                                         | 0.41  | 0.35  | 1.63   | 0.55   | -0.53 | 6.76E-01 | 2.55 | 6.95E-03 | -0.31 | 9.12E-01 | EGA3-1 |
| ENSMMUG00000005322 | LEP          | Leptin                                                                                | 0.01  | 0.00  | 2.11   | 12.44  | -0.23 | 9.41E-01 | 6.61 | 7.60E-05 | 2.78  | 2.68E-01 | EGA3-1 |
| ENSMMUG00000001671 | CHCHD3       | Coiled-coil-helix-coiled-coil-helix Domain Containing 3                               | 22.89 | 10.67 | 40.85  | 28.11  | -1.27 | 9.07E-02 | 2.12 | 1.99E-03 | -0.67 | 6.33E-01 | EGA3-1 |
| ENSMMUG00000043412 | LOC100429934 | Uncharacterized Protein C7orf73                                                       | 15.99 | 9.20  | 45.99  | 29.85  | -1.52 | 2.93E-01 | 2.60 | 4.34E-02 | -0.21 | 9.64E-01 | EGA3-1 |
| ENSMMUG00000015282 | ADCK2        | AarF Domain Containing Kinase 2                                                       | 2.25  | 2.30  | 14.93  | 10.55  | 0.21  | 8.97E-01 | 2.50 | 1.95E-02 | -1.09 | 5.96E-01 | EGA3-1 |
| ENSMMUG00000038113 |              |                                                                                       | 4.28  | 0.97  | 8.86   | 11.36  | -2.08 | 8.37E-02 | 3.00 | 7.52E-03 | 0.18  | 9.66E-01 | EGA3-1 |
| ENSMMUG00000040650 | MRPS33       | Mitochondrial Ribosomal Protein S33                                                   | 4.83  | 1.94  | 11.07  | 10.54  | -1.41 | 1.57E-01 | 2.97 | 7.08E-04 | -0.27 | 9.23E-01 | EGA3-1 |
| ENSMMUG00000044438 |              |                                                                                       | 0.21  | 0.34  | 0.54   | 0.88   | -0.03 | 9.80E-01 | 1.69 | 1.96E-02 | 0.55  | 7.28E-01 | EGA3-1 |
| ENSMMUG00000000767 | ZNF398       | Zinc Finger Protein 398                                                               | 2.87  | 3.41  | 6.23   | 3.63   | -0.01 | 9.92E-01 | 1.21 | 4.54E-02 | -1.30 | 1.11E-01 | EGA3-1 |
| ENSMMUG00000018920 | ACTR3B       | ARP3 Actin Related Protein 3 Homolog B                                                | 5.41  | 1.74  | 7.92   | 2.01   | -1.38 | 1.91E-01 | 2.25 | 1.89E-02 | -2.25 | 8.06E-02 | EGA3-1 |
| ENSMMUG00000006331 | PAXIP1       | PAX Interacting Protein 1                                                             | 4.32  | 3.34  | 6.89   | 7.48   | -0.50 | 3.27E-01 | 1.11 | 1.14E-02 | 0.09  | 9.55E-01 | EGA3-1 |

|                    |           |                                               |       |        |        |        |       |          |      |          |       |          |        |
|--------------------|-----------|-----------------------------------------------|-------|--------|--------|--------|-------|----------|------|----------|-------|----------|--------|
| ENSMMUG00000010935 | SLC6A19   | Solute Carrier Family 6 Member 19             | 0.00  | 0.04   | 3.41   | 10.58  | 1.62  | 3.86E-01 | 7.16 | 2.69E-08 | 1.43  | 5.78E-01 | EGA3-1 |
| ENSMMUG00000004447 | NDUFS6    | NADH:ubiquinone Oxidoreductase Subunit S6     | 2.53  | 2.37   | 12.91  | 10.15  | -0.46 | 7.24E-01 | 2.30 | 1.70E-02 | 0.00  | 9.99E-01 | EGA3-1 |
| ENSMMUG00000018746 | FASTKD3   | FAST Kinase Domains 3                         | 1.73  | 2.72   | 10.64  | 8.33   | -0.64 | 6.07E-01 | 2.57 | 7.72E-03 | 0.46  | 8.58E-01 | EGA3-1 |
| ENSMMUG00000016224 | LOC701519 | Threonine-tRNA Ligase, Cytoplasmic            | 4.12  | 4.74   | 12.51  | 11.43  | 0.52  | 4.07E-01 | 1.66 | 1.15E-03 | -0.56 | 5.77E-01 | EGA3-1 |
| ENSMMUG00000030176 |           |                                               | 13.66 | 32.16  | 113.94 | 55.63  | 0.82  | 3.87E-01 | 2.13 | 7.29E-03 | -0.18 | 9.49E-01 | EGA3-1 |
| ENSMMUG00000021218 | FYB1      | FYN Binding Protein 1                         | 0.01  | 0.02   | 4.06   | 16.19  | 1.48  | 3.78E-01 | 6.56 | 1.16E-08 | 2.27  | 1.90E-01 | EGA3-1 |
| ENSMMUG00000013841 | PARP8     | Poly(ADP-ribose) Polymerase Family Member 8   | 2.12  | 1.41   | 3.36   | 3.70   | -1.70 | 1.51E-01 | 2.31 | 3.71E-02 | -1.43 | 4.43E-01 | EGA3-1 |
| ENSMMUG00000011995 | ARL15     | ADP Ribosylation Factor Like GTPase 15        | 1.71  | 1.39   | 3.21   | 6.46   | -1.41 | 1.59E-01 | 2.14 | 1.94E-02 | -0.36 | 8.87E-01 | EGA3-1 |
| ENSMMUG00000030099 | PLPP1     | Phospholipid Phosphatase 1                    | 4.53  | 1.00   | 4.12   | 3.97   | -2.46 | 7.64E-02 | 2.97 | 2.53E-02 | -0.35 | 9.34E-01 | EGA3-1 |
| ENSMMUG00000030085 | SETD9     | SET Domain Containing 9                       | 0.54  | 0.44   | 0.76   | 0.85   | -2.87 | 6.93E-02 | 3.41 | 2.41E-02 | 0.17  | 9.74E-01 | EGA3-1 |
| ENSMMUG00000021813 |           |                                               | 1.88  | 7.92   | 26.76  | 13.13  | 1.26  | 3.17E-01 | 2.74 | 1.16E-02 | -0.67 | 7.97E-01 | EGA3-1 |
| ENSMMUG00000023177 | ZFYVE16   | Zinc Finger FYVE-type Containing 16           | 0.94  | 1.40   | 3.61   | 3.25   | 1.03  | 2.49E-01 | 1.69 | 3.51E-02 | 0.83  | 5.77E-01 | EGA3-1 |
| ENSMMUG00000040409 |           |                                               | 67.87 | 129.96 | 263.28 | 346.31 | -0.01 | 9.96E-01 | 1.69 | 1.10E-02 | 0.46  | 7.65E-01 | EGA3-1 |
| ENSMMUG00000009319 | TMEM161B  | Transmembrane Protein 161B                    | 0.23  | 2.56   | 3.89   | 6.06   | 0.02  | 9.88E-01 | 2.84 | 4.00E-03 | 2.13  | 1.34E-01 | EGA3-1 |
| ENSMMUG00000046953 |           |                                               | 3.45  | 2.04   | 13.35  | 17.56  | -0.88 | 3.95E-01 | 3.29 | 7.54E-05 | 0.10  | 9.74E-01 | EGA3-1 |
| ENSMMUG00000002062 | CAST      | Calpastatin                                   | 0.92  | 0.84   | 4.44   | 11.06  | -0.52 | 5.58E-01 | 2.55 | 1.67E-04 | 1.62  | 9.16E-02 | EGA3-1 |
| ENSMMUG00000007844 | PAM       | Peptidylglycine Alpha-amidating Monooxygenase | 0.59  | 0.17   | 1.98   | 1.36   | -2.81 | 5.37E-02 | 5.70 | 1.38E-05 | -0.79 | 8.13E-01 | EGA3-1 |
| ENSMMUG00000010858 | P4HA2     | Prolyl 4-hydroxylase Subunit Alpha 2          | 0.79  | 0.68   | 2.41   | 3.04   | -2.20 | 1.65E-01 | 4.75 | 5.86E-04 | 1.01  | 7.54E-01 | EGA3-1 |
| ENSMMUG00000005285 | PCBD2     | Pterin-4 Alpha-carbinolamine Dehydratase 2    | 0.79  | 0.69   | 4.87   | 6.88   | -1.29 | 4.90E-01 | 3.49 | 1.97E-02 | 2.80  | 2.05E-01 | EGA3-1 |
| ENSMMUG00000029774 |           |                                               | 13.01 | 15.57  | 51.42  | 66.37  | 0.06  | 9.64E-01 | 2.23 | 9.24E-03 | 0.56  | 7.85E-01 | EGA3-1 |
| ENSMMUG00000022869 | GM2A      | GM2 Ganglioside Activator                     | 0.86  | 0.51   | 19.74  | 65.46  | -2.05 | 5.71E-02 | 6.08 | 1.03E-10 | 1.91  | 2.00E-01 | EGA3-1 |
| ENSMMUG00000048691 | HAVCR2    | Hepatitis A Virus Cellular Receptor 2         | 0.05  | 0.11   | 1.21   | 2.98   | -0.54 | 7.20E-01 | 4.68 | 6.82E-06 | -0.63 | 8.11E-01 | EGA3-1 |
| ENSMMUG00000019550 | CCNG1     | Cyclin G1                                     | 24.83 | 23.56  | 76.60  | 63.37  | -0.34 | 6.26E-01 | 1.93 | 1.99E-04 | -0.55 | 6.00E-01 | EGA3-1 |
| ENSMMUG00000007457 | WWC1      | WW And C2 Domain Containing 1                 | 0.32  | 1.51   | 9.11   | 10.36  | 0.13  | 9.40E-01 | 2.84 | 5.82E-03 | 2.67  | 5.04E-02 | EGA3-1 |
| ENSMMUG00000014124 |           |                                               | 0.43  | 0.32   | 1.57   | 0.49   | -1.41 | 3.96E-01 | 2.88 | 4.76E-02 | -2.97 | 1.45E-01 | EGA3-1 |
| ENSMMUG00000043362 | UBTD2     | Ubiquitin Domain Containing 2                 | 7.32  | 3.99   | 9.15   | 3.79   | -1.20 | 1.57E-01 | 1.69 | 3.18E-02 | -1.63 | 1.34E-01 | EGA3-1 |
| ENSMMUG00000000144 | TSPAN17   | Tetraspanin 17                                | 0.16  | 0.13   | 2.19   | 3.16   | -2.13 | 1.87E-01 | 5.36 | 8.07E-05 | 0.76  | 8.20E-01 | EGA3-1 |
| ENSMMUG00000045904 | TMED9     | Transmembrane P24 Trafficking Protein 9       | 5.70  | 5.99   | 12.73  | 8.64   | -0.15 | 8.94E-01 | 1.79 | 1.16E-02 | -0.56 | 7.15E-01 | EGA3-1 |
| ENSMMUG00000013347 |           |                                               | 8.50  | 4.78   | 16.24  | 6.98   | -1.30 | 2.03E-01 | 2.51 | 5.57E-03 | -2.15 | 8.47E-02 | EGA3-1 |
| ENSMMUG00000037816 | SERPINB6  | Serpin Family B Member 6                      | 0.55  | 0.25   | 6.76   | 10.06  | -1.41 | 1.18E-01 | 4.54 | 2.86E-09 | 1.26  | 3.36E-01 | EGA3-1 |
| ENSMMUG00000008487 | NQO2      | N-ribosyldihydroquinone reductase 2           | 1.47  | 0.78   | 3.52   | 4.42   | 0.51  | 8.08E-01 | 3.11 | 3.85E-02 | -0.61 | 8.78E-01 | EGA3-1 |
| ENSMMUG00000008483 | BPHL      | Biphenyl Hydrolase Like                       | 0.54  | 0.55   | 5.11   | 3.31   | -0.12 | 9.43E-01 | 3.20 | 2.45E-03 | 0.82  | 7.32E-01 | EGA3-1 |
| ENSMMUG00000017480 | ZNF322    | Zinc Finger Protein 322                       | 0.70  | 1.12   | 4.82   | 2.76   | 0.59  | 6.32E-01 | 2.35 | 1.37E-02 | -0.42 | 8.67E-01 | EGA3-1 |
| ENSMMUG00000040347 | LOC704341 | Histone H4                                    | 6.03  | 97.66  | 125.96 | 213.06 | 1.94  | 1.23E-01 | 2.35 | 4.49E-02 | -0.14 | 9.74E-01 | EGA3-1 |
| ENSMMUG00000015688 | POU5F1    | POU Class 5 Homeobox 1                        | 4.81  | 16.21  | 70.13  | 49.63  | 1.22  | 2.15E-01 | 2.22 | 1.13E-02 | -0.34 | 8.92E-01 | EGA3-1 |
| ENSMMUG00000018432 | PPT2      | Palmitoyl-protein Thioesterase 2              | 11.88 | 20.90  | 57.60  | 34.43  | 0.88  | 1.00E-01 | 1.40 | 4.00E-03 | -0.45 | 6.54E-01 | EGA3-1 |
| ENSMMUG00000037503 |           |                                               | 15.99 | 35.54  | 102.92 | 112.03 | 0.50  | 5.98E-01 | 2.00 | 7.12E-03 | 0.36  | 8.54E-01 | EGA3-1 |
| ENSMMUG00000023322 | YIPF3     | Yip1 Domain Family Member 3                   | 2.62  | 5.25   | 13.32  | 15.62  | 0.10  | 9.39E-01 | 2.08 | 9.85E-03 | 1.53  | 2.03E-01 | EGA3-1 |
| ENSMMUG00000014387 | AARS2     | Alanyl-tRNA Synthetase 2, Mitochondrial       | 0.09  | 0.61   | 1.93   | 2.42   | 1.36  | 3.48E-01 | 3.17 | 9.55E-03 | 0.08  | 9.86E-01 | EGA3-1 |

|                    |           |                                                                                 |        |        |        |        |       |          |      |          |       |          |        |
|--------------------|-----------|---------------------------------------------------------------------------------|--------|--------|--------|--------|-------|----------|------|----------|-------|----------|--------|
| ENSMMUG00000011905 | TNFRSF21  | TNF Receptor Superfamily Member 21                                              | 0.15   | 0.58   | 8.04   | 4.91   | 1.55  | 1.88E-01 | 3.13 | 2.26E-03 | 1.16  | 5.54E-01 | EGA3-1 |
| ENSMMUG00000021149 | MCM3      | Minichromosome Maintenance Complex Component 3                                  | 16.25  | 13.86  | 24.16  | 18.64  | -0.02 | 9.75E-01 | 1.04 | 2.56E-02 | -1.00 | 1.20E-01 | EGA3-1 |
| ENSMMUG00000029608 | LOC712599 | 60S Ribosomal Protein L37 Pseudogene                                            | 211.62 | 291.37 | 586.61 | 377.29 | 0.47  | 3.28E-01 | 0.97 | 2.05E-02 | -0.22 | 8.30E-01 | EGA3-1 |
| ENSMMUG00000009060 | FAM135A   | Family With Sequence Similarity 135 Member A                                    | 3.63   | 5.77   | 12.83  | 11.23  | 0.17  | 8.26E-01 | 1.11 | 3.79E-02 | 0.31  | 8.04E-01 | EGA3-1 |
| ENSMMUG00000043152 | LOC717879 | Cytochrome C Oxidase Subunit 7A2, Mitochondrial                                 | 6.62   | 16.68  | 62.58  | 64.07  | 0.78  | 4.39E-01 | 2.81 | 5.43E-04 | -0.03 | 9.92E-01 | EGA3-1 |
| ENSMMUG00000017186 | PHIP      | Pleckstrin Homology Domain Interacting Protein                                  | 1.53   | 3.53   | 10.00  | 16.25  | 1.19  | 1.66E-01 | 1.74 | 2.81E-02 | 0.89  | 5.36E-01 | EGA3-1 |
| ENSMMUG00000010749 | IBTK      | Inhibitor Of Bruton Tyrosine Kinase                                             | 6.22   | 6.54   | 21.02  | 18.36  | 0.03  | 9.75E-01 | 2.01 | 1.49E-04 | 0.00  | 9.99E-01 | EGA3-1 |
| ENSMMUG00000047198 | UBE2J1    | Ubiquitin Conjugating Enzyme E2 J1                                              | 0.32   | 0.26   | 2.75   | 10.43  | -0.48 | 6.52E-01 | 3.85 | 3.65E-07 | 1.96  | 6.71E-02 | EGA3-1 |
| ENSMMUG00000044648 |           |                                                                                 | 1.29   | 0.99   | 3.51   | 1.29   | 0.18  | 9.08E-01 | 2.53 | 9.28E-03 | -1.41 | 4.01E-01 | EGA3-1 |
| ENSMMUG00000040918 |           |                                                                                 | 0.42   | 0.29   | 2.71   | 2.30   | -0.81 | 6.52E-01 | 2.93 | 3.40E-02 | 0.46  | 9.05E-01 | EGA3-1 |
| ENSMMUG00000029511 | GTF2H5    | General Transcription Factor IIF Subunit 5                                      | 8.30   | 8.46   | 22.84  | 29.06  | -0.92 | 3.66E-01 | 2.31 | 6.97E-03 | 0.66  | 7.32E-01 | EGA3-1 |
| ENSMMUG00000011171 | TFB1M     | Transcription Factor B1, Mitochondrial                                          | 4.38   | 2.97   | 11.15  | 11.52  | -1.16 | 2.09E-01 | 2.67 | 8.80E-04 | -0.10 | 9.73E-01 | EGA3-1 |
| ENSMMUG00000011172 | CLDN20    | Claudin 20                                                                      | 0.05   | 0.11   | 0.83   | 2.15   | -0.45 | 8.78E-01 | 6.36 | 4.11E-04 | 2.06  | 5.58E-01 | EGA3-1 |
| ENSMMUG00000004893 | SASH1     | SAM And SH3 Domain Containing 1                                                 | 1.01   | 0.94   | 8.45   | 6.88   | 0.07  | 9.61E-01 | 3.49 | 2.85E-05 | -1.28 | 3.78E-01 | EGA3-1 |
| ENSMMUG00000029445 | CITED2    | Cbp/p300 Interacting Transactivator With Glu/Asp Rich Carboxy-terminal Domain 2 | 4.85   | 5.98   | 22.31  | 44.00  | -0.88 | 4.79E-01 | 2.49 | 1.49E-02 | 0.31  | 9.19E-01 | EGA3-1 |
| ENSMMUG00000000224 | REPS1     | RALBP1 Associated Eps Domain Containing 1                                       | 3.25   | 7.68   | 32.61  | 31.01  | 0.66  | 5.57E-01 | 2.79 | 1.47E-03 | -0.22 | 9.43E-01 | EGA3-1 |
| ENSMMUG00000008869 | TNFAIP3   | TNF Alpha Induced Protein 3                                                     | 0.56   | 0.17   | 4.81   | 2.53   | -2.88 | 8.85E-02 | 6.74 | 5.00E-06 | -0.12 | 9.84E-01 | EGA3-1 |
| ENSMMUG00000009092 |           |                                                                                 | 0.37   | 1.21   | 29.25  | 202.12 | 1.20  | 3.54E-01 | 3.26 | 2.20E-03 | 2.35  | 1.20E-01 | EGA3-1 |
| ENSMMUG00000004293 | TRMT11    | TRNA Methyltransferase 11 Homolog                                               | 4.20   | 1.95   | 10.28  | 10.41  | -1.04 | 3.36E-01 | 2.38 | 9.81E-03 | 0.58  | 7.96E-01 | EGA3-1 |
| ENSMMUG00000004291 | HINT3     | Histidine Triad Nucleotide Binding Protein 3                                    | 0.23   | 0.40   | 3.94   | 1.25   | 2.41  | 1.91E-01 | 3.35 | 4.38E-02 | -1.16 | 7.57E-01 | EGA3-1 |
| ENSMMUG00000015317 | HDDC2     | HD Domain Containing 2                                                          | 6.29   | 12.62  | 50.62  | 14.96  | 0.67  | 5.72E-01 | 2.02 | 3.59E-02 | -0.91 | 6.30E-01 | EGA3-1 |
| ENSMMUG00000000628 | UBE3A     | Ubiquitin Protein Ligase E3A                                                    | 1.82   | 4.49   | 9.55   | 8.07   | 0.63  | 4.58E-01 | 1.53 | 3.32E-02 | -0.19 | 9.35E-01 | EGA3-1 |
| ENSMMUG00000020939 | LPCAT4    | Lysophosphatidylcholine Acyltransferase 4                                       | 2.61   | 0.81   | 7.57   | 8.17   | -1.42 | 1.25E-01 | 2.72 | 9.64E-04 | 1.02  | 5.08E-01 | EGA3-1 |
| ENSMMUG00000004158 |           |                                                                                 | 1.95   | 1.92   | 9.62   | 2.01   | -0.63 | 6.67E-01 | 2.57 | 2.12E-02 | -1.64 | 3.69E-01 | EGA3-1 |
| ENSMMUG00000014539 | VPS18     | VPS18, CORVET/HOPS Core Subunit                                                 | 0.76   | 0.79   | 2.61   | 3.85   | -0.08 | 9.58E-01 | 2.09 | 2.81E-02 | 1.13  | 5.06E-01 | EGA3-1 |
| ENSMMUG00000008169 | ITPKA     | Inositol-trisphosphate 3-kinase A                                               | 0.05   | 0.08   | 1.29   | 0.98   | 0.80  | 7.21E-01 | 3.62 | 2.35E-02 | 1.37  | 6.81E-01 | EGA3-1 |
| ENSMMUG00000013803 | TYRO3     | TYRO3 Protein Tyrosine Kinase                                                   | 2.69   | 1.71   | 11.74  | 7.61   | -1.59 | 1.26E-01 | 2.76 | 3.26E-03 | -0.88 | 6.49E-01 | EGA3-1 |
| ENSMMUG00000006498 | UBR1      | Ubiquitin Protein Ligase E3 Component N-recognin 1                              | 4.89   | 3.75   | 5.83   | 9.27   | -0.66 | 3.00E-01 | 1.34 | 1.50E-02 | -0.21 | 8.91E-01 | EGA3-1 |
| ENSMMUG00000006507 | TMEM62    | Transmembrane Protein 62                                                        | 0.57   | 0.52   | 2.35   | 4.60   | -0.90 | 4.56E-01 | 2.66 | 6.95E-03 | 1.74  | 2.47E-01 | EGA3-1 |
| ENSMMUG00000001682 | PDIA3     | Protein Disulfide Isomerase Family A Member 3                                   | 26.07  | 48.25  | 117.99 | 169.54 | 0.89  | 9.87E-02 | 1.30 | 9.41E-03 | 0.31  | 7.98E-01 | EGA3-1 |
| ENSMMUG00000016898 |           |                                                                                 | 19.90  | 16.33  | 34.82  | 23.21  | -0.54 | 3.25E-01 | 1.34 | 3.75E-03 | -0.87 | 2.18E-01 | EGA3-1 |
| ENSMMUG00000039846 |           |                                                                                 | 5.20   | 10.51  | 40.22  | 73.66  | 0.88  | 2.85E-01 | 1.94 | 6.21E-03 | 1.47  | 1.50E-01 | EGA3-1 |
| ENSMMUG00000010798 | CCPG1     | Cell Cycle Progression 1                                                        | 7.65   | 29.12  | 80.58  | 61.28  | 1.52  | 8.20E-02 | 2.12 | 9.01E-03 | -1.35 | 2.91E-01 | EGA3-1 |



|                     |            |                                                                                                 |       |       |        |        |       |          |      |          |       |          |        |
|---------------------|------------|-------------------------------------------------------------------------------------------------|-------|-------|--------|--------|-------|----------|------|----------|-------|----------|--------|
| ENSMMUG00000010797  | PIGB       | Phosphatidylinositol Glycan Anchor Biosynthesis Class B                                         | 2.35  | 0.45  | 3.51   | 3.64   | -1.84 | 8.61E-02 | 2.49 | 1.33E-02 | 0.32  | 9.13E-01 | EGA3-1 |
| ENSMMUG00000029638  | C7H15orf65 | Chromosome 7 C15orf65 Homolog                                                                   | 0.98  | 0.70  | 3.96   | 6.10   | -1.10 | 2.79E-01 | 3.26 | 1.19E-04 | -0.11 | 9.73E-01 | EGA3-1 |
| ENSMMUG00000019021  |            |                                                                                                 | 4.57  | 3.81  | 22.26  | 35.02  | 0.19  | 9.01E-01 | 2.29 | 1.93E-02 | 0.86  | 6.70E-01 | EGA3-1 |
| ENSMMUG00000011677  | COX5A      | Cytochrome C Oxidase Subunit 5A                                                                 | 26.24 | 30.78 | 132.86 | 171.22 | 0.10  | 8.98E-01 | 2.40 | 9.12E-07 | -0.06 | 9.76E-01 | EGA3-1 |
| ENSMMUG00000013669  | SH3GL3     | SH3 Domain Containing GRB2 Like 3, Endophilin A3                                                | 0.03  | 0.12  | 1.30   | 4.13   | 3.55  | 6.28E-02 | 3.92 | 2.13E-02 | 0.55  | 9.10E-01 | EGA3-1 |
| ENSMMUG00000011486  | SEC11A     | SEC11 Homolog A, Signal Peptidase Complex Subunit                                               | 4.24  | 5.36  | 18.03  | 16.34  | 0.26  | 7.97E-01 | 1.87 | 6.81E-03 | 0.33  | 8.53E-01 | EGA3-1 |
| ENSMMUG00000014992  | RAB2B      | RAB2B, Member RAS Oncogene Family                                                               | 5.73  | 3.22  | 7.86   | 4.38   | -1.23 | 1.82E-01 | 1.91 | 2.38E-02 | -0.72 | 6.79E-01 | EGA3-1 |
| ENSMMUG00000006007  | PSMB5      | Proteasome Subunit Beta 5                                                                       | 20.11 | 12.03 | 35.58  | 33.02  | -1.01 | 2.54E-01 | 2.00 | 9.66E-03 | -0.81 | 5.89E-01 | EGA3-1 |
| ENSMMUG00000012726  | NUBPL      | Nucleotide Binding Protein Like                                                                 | 0.11  | 0.15  | 3.95   | 2.54   | 0.19  | 9.26E-01 | 5.31 | 8.67E-06 | -0.96 | 7.32E-01 | EGA3-1 |
| ENSMMUG00000016512  | FKBP3      | FK506 Binding Protein 3                                                                         | 2.93  | 2.35  | 13.89  | 15.40  | -0.34 | 6.85E-01 | 2.96 | 7.37E-07 | 0.01  | 9.97E-01 | EGA3-1 |
| ENSMMUG00000016009  |            |                                                                                                 | 5.79  | 13.96 | 32.81  | 50.30  | 0.97  | 1.76E-01 | 1.51 | 2.11E-02 | -0.15 | 9.46E-01 | EGA3-1 |
| ENSMMUG00000014249  |            |                                                                                                 | 0.68  | 0.17  | 3.03   | 8.06   | -2.16 | 7.74E-02 | 3.62 | 1.22E-03 | -0.37 | 9.10E-01 | EGA3-1 |
| ENSMMUG00000018200  | RTRAF      | RNA Transcription, Translation And Transport Factor                                             | 48.50 | 55.29 | 103.99 | 66.75  | -0.30 | 6.98E-01 | 1.42 | 1.39E-02 | -0.53 | 6.53E-01 | EGA3-1 |
| ENSMMUG00000049010  |            |                                                                                                 | 7.94  | 5.51  | 20.49  | 28.47  | -0.63 | 4.57E-01 | 1.90 | 5.79E-03 | 0.81  | 5.31E-01 | EGA3-1 |
| ENSMMUG00000003565  | LGALS3     | Galectin 3                                                                                      | 0.54  | 0.68  | 1.10   | 0.30   | -1.15 | 6.07E-01 | 3.71 | 3.88E-02 | -3.43 | 1.99E-01 | EGA3-1 |
| ENSMMUG00000008205  | PPP2R5E    | Protein Phosphatase 2 Regulatory Subunit B'epsilon                                              | 2.29  | 2.90  | 9.03   | 7.33   | 0.21  | 7.94E-01 | 1.62 | 3.67E-03 | -0.50 | 6.69E-01 | EGA3-1 |
| ENSMMUG00000044485  |            |                                                                                                 | 6.51  | 3.26  | 11.08  | 8.35   | -0.96 | 9.16E-02 | 2.23 | 9.33E-06 | -0.62 | 5.32E-01 | EGA3-1 |
| ENSMMUG00000001319  | MTHFD1     | Methylenetetrahydrofolate Dehydrogenase, Cyclohydrolase And Formyltetrahydrofolate Synthetase 1 | 3.23  | 9.98  | 28.26  | 27.88  | 1.24  | 1.52E-01 | 2.20 | 4.52E-03 | -0.81 | 5.97E-01 | EGA3-1 |
| ENSMMUG00000004747  |            |                                                                                                 | 0.06  | 0.05  | 1.80   | 1.74   | -0.95 | 7.17E-01 | 6.88 | 8.83E-05 | -1.30 | 7.39E-01 | EGA3-1 |
| ENSMMUG00000010767  | ACTN1      | Actinin Alpha 1                                                                                 | 0.31  | 0.98  | 18.59  | 49.53  | 1.09  | 2.35E-01 | 4.49 | 2.15E-09 | 1.26  | 3.30E-01 | EGA3-1 |
| ENSMMUG00000011089  | SYNJ2BP    | Synaptojanin 2 Binding Protein                                                                  | 10.21 | 7.34  | 27.98  | 17.55  | -1.05 | 3.11E-01 | 2.81 | 1.31E-03 | -0.68 | 7.35E-01 | EGA3-1 |
| ENSMMUG00000006563  | NPC2       | NPC Intracellular Cholesterol Transporter 2                                                     | 4.01  | 7.87  | 97.17  | 201.42 | 0.25  | 8.53E-01 | 4.19 | 7.92E-07 | 0.31  | 9.04E-01 | EGA3-1 |
| ENSMMUG00000042742  |            |                                                                                                 | 10.62 | 13.91 | 261.08 | 437.86 | -0.44 | 7.47E-01 | 5.48 | 1.90E-09 | 0.53  | 8.28E-01 | EGA3-1 |
| ENSMMUG00000001095  | POMT2      | Protein O-mannosyltransferase 2                                                                 | 0.49  | 0.51  | 2.60   | 3.71   | -0.11 | 9.40E-01 | 2.68 | 3.46E-03 | 0.04  | 9.91E-01 | EGA3-1 |
| ENSMMUG00000013556  | SPTLC2     | Serine Palmitoyltransferase Long Chain Base Subunit 2                                           | 1.64  | 5.73  | 40.23  | 26.29  | 1.40  | 1.46E-01 | 3.26 | 9.95E-05 | -0.61 | 7.64E-01 | EGA3-1 |
| ENSMMUG00000047571  |            |                                                                                                 | 9.91  | 5.93  | 12.14  | 13.70  | -1.01 | 2.31E-01 | 1.60 | 3.76E-02 | -0.04 | 9.89E-01 | EGA3-1 |
| ENSMMUG00000019898  | FOXN3      | Forkhead Box N3                                                                                 | 2.15  | 2.06  | 12.48  | 7.12   | -1.98 | 1.62E-01 | 3.22 | 1.19E-02 | 0.79  | 7.99E-01 | EGA3-1 |
| ENSMMUG00000000321  | TTC7B      | Tetratricopeptide Repeat Domain 7B                                                              | 1.72  | 2.49  | 7.73   | 12.63  | -0.69 | 5.59E-01 | 2.02 | 3.71E-02 | -0.52 | 8.22E-01 | EGA3-1 |
| ENSMMUG000000022428 | NDUFB1     | NADH:ubiquinone Oxidoreductase Subunit B1                                                       | 33.40 | 35.43 | 80.37  | 73.82  | 0.07  | 9.47E-01 | 2.07 | 1.40E-03 | -0.95 | 3.95E-01 | EGA3-1 |
| ENSMMUG00000042148  | PRIMA1     | Proline Rich Membrane Anchor 1                                                                  | 0.00  | 0.01  | 0.52   | 1.27   | -0.10 | 9.74E-01 | 7.36 | 2.05E-05 | 1.13  | 7.82E-01 | EGA3-1 |
| ENSMMUG00000040090  | LOC706584  | Uncharacterized LOC706584                                                                       | 0.00  | 0.01  | 1.32   | 2.42   | 1.55  | 6.15E-01 | 6.06 | 6.22E-03 | 1.46  | 7.71E-01 | EGA3-1 |
| ENSMMUG00000042349  | IFI27L2    | Interferon Alpha Inducible Protein 27 Like 2                                                    | 0.39  | 0.07  | 0.31   | 0.63   | -2.33 | 1.30E-01 | 3.52 | 1.31E-02 | 0.09  | 9.86E-01 | EGA3-1 |

|                     |           |                                                                    |        |        |         |         |       |          |       |          |       |          |        |
|---------------------|-----------|--------------------------------------------------------------------|--------|--------|---------|---------|-------|----------|-------|----------|-------|----------|--------|
| ENSMMUG00000006218  |           |                                                                    | 9.14   | 8.09   | 28.29   | 20.36   | -0.38 | 7.71E-01 | 2.21  | 1.74E-02 | -0.02 | 9.95E-01 | EGA3-1 |
| ENSMMUG00000005780  | DYNC1H1   | Dynein Cytoplasmic 1 Heavy Chain 1                                 | 2.78   | 3.45   | 14.14   | 25.12   | 0.39  | 6.30E-01 | 1.88  | 2.38E-03 | 0.66  | 5.87E-01 | EGA3-1 |
| ENSMMUG00000001273  | CLBA1     | Clathrin Binding Box Of Aftiphilin Containing 1                    | 0.15   | 0.09   | 1.01    | 0.62    | -2.92 | 1.02E-01 | 5.12  | 1.28E-03 | 0.13  | 9.83E-01 | EGA3-1 |
| ENSMMUG000000021677 |           |                                                                    | 0.16   | 0.04   | 4.13    | 0.83    | -1.95 | 3.04E-01 | 4.66  | 3.27E-03 | 0.17  | 9.75E-01 | EGA3-1 |
| ENSMMUG00000005063  | CDKL5     | Cyclin Dependent Kinase Like 5                                     | 8.18   | 8.96   | 22.81   | 6.35    | -0.54 | 5.31E-01 | 2.31  | 5.13E-04 | -1.65 | 7.62E-02 | EGA3-1 |
| ENSMMUG00000008224  |           |                                                                    | 9.72   | 20.73  | 76.00   | 76.75   | 0.63  | 5.57E-01 | 2.82  | 7.11E-04 | -0.12 | 9.69E-01 | EGA3-1 |
| ENSMMUG000000026869 | MIR221    | MicroRNA 221                                                       | 0.00   | 0.00   | 3.02    | 0.43    | -4.74 | 5.37E-01 | ##### | 1.07E-05 | -7.67 | 4.79E-01 | EGA3-1 |
| ENSMMUG000000046063 |           |                                                                    | 0.88   | 0.74   | 5.24    | 1.87    | -0.65 | 6.19E-01 | 2.70  | 7.57E-03 | -1.90 | 2.10E-01 | EGA3-1 |
| ENSMMUG00000004547  | TIMM17B   | Translocase Of Inner Mitochondrial Membrane 17B                    | 0.53   | 1.42   | 4.76    | 8.79    | -0.23 | 9.26E-01 | 3.19  | 4.58E-02 | 1.54  | 6.07E-01 | EGA3-1 |
| ENSMMUG000000023024 | PRICKLE3  | Prickle Planar Cell Polarity Protein 3                             | 0.05   | 0.08   | 0.95    | 0.90    | -1.55 | 5.00E-01 | 7.73  | 4.02E-06 | -0.27 | 9.64E-01 | EGA3-1 |
| ENSMMUG000000006362 | HUWE1     | HECT, UBA And WWE Domain Containing 1, E3 Ubiquitin Protein Ligase | 15.03  | 18.76  | 53.98   | 56.31   | 0.47  | 3.48E-01 | 1.55  | 1.72E-04 | 0.01  | 9.94E-01 | EGA3-1 |
| ENSMMUG000000014678 | KLF8      | Kruppel Like Factor 8                                              | 0.37   | 1.03   | 30.50   | 16.00   | 2.17  | 9.39E-02 | 4.54  | 6.92E-05 | -0.33 | 9.31E-01 | EGA3-1 |
| ENSMMUG000000049034 |           |                                                                    | 0.14   | 0.13   | 0.75    | 0.80    | -1.16 | 4.71E-01 | 3.27  | 1.36E-02 | 0.16  | 9.74E-01 | EGA3-1 |
| ENSMMUG000000015653 | MSN       | Moesin                                                             | 21.35  | 37.29  | 77.92   | 37.29   | 0.48  | 5.20E-01 | 1.42  | 1.89E-02 | -0.41 | 7.68E-01 | EGA3-1 |
| ENSMMUG000000037523 |           |                                                                    | 37.58  | 58.40  | 120.48  | 86.33   | 0.49  | 4.15E-01 | 1.09  | 3.44E-02 | -0.22 | 8.70E-01 | EGA3-1 |
| ENSMMUG000000015861 |           |                                                                    | 36.11  | 40.75  | 151.65  | 134.72  | 0.56  | 4.65E-01 | 2.08  | 7.21E-04 | -0.44 | 7.60E-01 | EGA3-1 |
| ENSMMUG000000001687 | HMGNS     | High Mobility Group Nucleosome Binding Domain 5                    | 0.88   | 0.42   | 4.52    | 3.65    | -1.12 | 3.55E-01 | 3.70  | 1.74E-04 | -0.15 | 9.69E-01 | EGA3-1 |
| ENSMMUG000000000379 | FAM133A   | Family With Sequence Similarity 133 Member A                       | 0.30   | 0.31   | 2.99    | 6.90    | 1.18  | 6.95E-01 | 4.53  | 4.08E-02 | 2.82  | 4.53E-01 | EGA3-1 |
| ENSMMUG000000040061 |           |                                                                    | 0.10   | 0.61   | 2.91    | 2.55    | 1.72  | 3.46E-01 | 3.33  | 1.73E-02 | 1.07  | 7.34E-01 | EGA3-1 |
| ENSMMUG000000004674 | PRPS1     | Phosphoribosyl Pyrophosphate Synthetase 1                          | 3.14   | 8.50   | 36.24   | 12.66   | 0.82  | 3.34E-01 | 2.69  | 1.12E-04 | -1.34 | 2.20E-01 | EGA3-1 |
| ENSMMUG000000013204 | NXT2      | Nuclear Transport Factor 2 Like Export Factor 2                    | 3.25   | 2.53   | 10.28   | 3.02    | -0.70 | 5.18E-01 | 2.14  | 1.45E-02 | -1.66 | 2.00E-01 | EGA3-1 |
| ENSMMUG000000004188 | ACSL4     | Acyl-CoA Synthetase Long Chain Family Member 4                     | 5.14   | 10.54  | 26.24   | 28.36   | 0.38  | 7.70E-01 | 2.02  | 3.41E-02 | 0.51  | 8.22E-01 | EGA3-1 |
| ENSMMUG000000044294 |           |                                                                    | 3.44   | 3.50   | 18.51   | 33.04   | 0.41  | 7.50E-01 | 2.14  | 2.38E-02 | 1.05  | 5.42E-01 | EGA3-1 |
| ENSMMUG000000038252 | LOC720015 | 10 KDa Heat Shock Protein, Mitochondrial                           | 244.50 | 137.11 | 1595.92 | 2328.61 | -1.02 | 1.63E-01 | 3.65  | 3.48E-09 | 0.39  | 8.06E-01 | EGA3-1 |
| ENSMMUG000000004954 | AIFM1     | Apoptosis Inducing Factor Mitochondria Associated 1                | 10.73  | 7.63   | 13.28   | 10.58   | -0.83 | 1.68E-01 | 1.20  | 3.03E-02 | -0.45 | 6.96E-01 | EGA3-1 |
| ENSMMUG000000003475 | STK26     | Serine/threonine Kinase 26                                         | 0.46   | 0.26   | 1.95    | 1.06    | -1.20 | 4.87E-01 | 3.36  | 1.80E-02 | -0.88 | 7.95E-01 | EGA3-1 |
| ENSMMUG000000037506 | FAM122C   | Family With Sequence Similarity 122C                               | 0.93   | 0.64   | 1.52    | 0.98    | -1.25 | 2.61E-01 | 2.43  | 1.29E-02 | -1.58 | 3.08E-01 | EGA3-1 |
| ENSMMUG000000008108 | ZNF449    | Zinc Finger Protein 449                                            | 4.51   | 1.28   | 10.19   | 2.78    | -1.82 | 8.14E-02 | 3.10  | 1.11E-03 | -1.13 | 5.30E-01 | EGA3-1 |
| ENSMMUG000000003375 |           |                                                                    | 2.67   | 4.21   | 13.19   | 11.40   | 0.47  | 7.27E-01 | 2.02  | 4.70E-02 | 0.49  | 8.45E-01 | EGA3-1 |
| ENSMMUG000000013668 | FLNA      | Filamin A                                                          | 4.96   | 7.92   | 25.65   | 20.09   | 0.85  | 1.98E-01 | 1.39  | 1.97E-02 | 0.27  | 8.63E-01 | EGA3-1 |
| ENSMMUG000000009015 | UBL4A     | Ubiquitin Like 4A                                                  | 0.28   | 0.12   | 1.24    | 2.83    | 1.15  | 5.57E-01 | 4.35  | 3.41E-03 | -0.85 | 8.14E-01 | EGA3-1 |
| ENSMMUG000000015095 | VBP1      | VHL Binding Protein 1                                              | 10.15  | 4.26   | 23.24   | 10.72   | -1.69 | 7.90E-02 | 2.82  | 1.32E-03 | -0.68 | 7.34E-01 | EGA3-1 |
| ENSMMUG000000042893 |           |                                                                    | 36.26  | 17.89  | 75.76   | 59.80   | -1.10 | 1.64E-01 | 2.30  | 9.36E-04 | -0.69 | 6.31E-01 | EGA3-1 |
| ENSMMUG000000018668 | AGPAT5    | 1-acylglycerol-3-phosphate O-acyltransferase 5                     | 0.97   | 1.97   | 7.72    | 7.38    | 1.37  | 1.87E-01 | 2.43  | 8.41E-03 | -0.56 | 8.03E-01 | EGA3-1 |
| ENSMMUG000000043748 | SLC25A37  | Solute Carrier Family 25 Member 37                                 | 0.32   | 0.22   | 1.70    | 2.84    | -2.05 | 8.02E-02 | 4.69  | 4.25E-06 | 2.65  | 6.11E-02 | EGA3-1 |
| ENSMMUG000000046186 |           |                                                                    | 2.85   | 3.23   | 14.28   | 7.59    | -1.13 | 1.59E-01 | 2.83  | 4.05E-05 | 0.03  | 9.93E-01 | EGA3-1 |
| ENSMMUG000000003212 | BRF2      | BRF2, RNA Polymerase III Transcription Initiation Factor Subunit   | 2.07   | 0.63   | 2.46    | 0.97    | -2.25 | 6.63E-02 | 2.44  | 4.03E-02 | -0.71 | 8.00E-01 | EGA3-1 |
| ENSMMUG000000003591 | PLEKHA2   | Pleckstrin Homology Domain Containing A2                           | 0.14   | 0.15   | 2.30    | 4.75    | 0.34  | 8.64E-01 | 3.63  | 5.28E-03 | 2.28  | 2.57E-01 | EGA3-1 |

|                    |           |                                                              |        |        |         |         |       |          |      |          |       |          |        |
|--------------------|-----------|--------------------------------------------------------------|--------|--------|---------|---------|-------|----------|------|----------|-------|----------|--------|
| ENSMMUG00000015360 | MCM4      | Minichromosome Maintenance Complex Component 4               | 7.66   | 10.82  | 18.39   | 20.19   | 0.55  | 3.00E-01 | 1.03 | 2.97E-02 | -0.29 | 7.91E-01 | EGA3-1 |
| ENSMMUG00000040487 |           |                                                              | 25.08  | 14.81  | 36.45   | 42.85   | -1.11 | 8.82E-02 | 1.48 | 1.61E-02 | 0.39  | 7.85E-01 | EGA3-1 |
| ENSMMUG00000013157 | LYPLA1    | Lysophospholipase I                                          | 0.81   | 4.10   | 21.32   | 43.11   | 1.90  | 6.72E-02 | 2.97 | 1.88E-03 | 0.83  | 6.89E-01 | EGA3-1 |
| ENSMMUG00000005539 | MRPL15    | Mitochondrial Ribosomal Protein L15                          | 2.92   | 13.04  | 31.86   | 36.57   | 1.05  | 4.10E-01 | 2.34 | 3.22E-02 | -0.22 | 9.53E-01 | EGA3-1 |
| ENSMMUG00000014149 | LYN       | LYN Proto-oncogene, Src Family Tyrosine Kinase               | 6.11   | 2.13   | 21.39   | 39.20   | -1.41 | 5.86E-02 | 3.45 | 2.18E-07 | 0.56  | 7.17E-01 | EGA3-1 |
| ENSMMUG00000046464 | CHCHD7    | Coiled-coil-helix-coiled-coil-helix Domain Containing 7      | 6.19   | 5.81   | 24.82   | 9.31    | 0.10  | 9.31E-01 | 1.64 | 3.40E-02 | -0.89 | 5.19E-01 | EGA3-1 |
| ENSMMUG00000014650 | IMPAD1    | Inositol Monophosphatase Domain Containing 1                 | 3.51   | 8.20   | 21.03   | 25.93   | 1.16  | 2.46E-01 | 1.79 | 4.84E-02 | 0.16  | 9.62E-01 | EGA3-1 |
| ENSMMUG00000001100 | UBXN2B    | UBX Domain Protein 2B                                        | 0.58   | 0.99   | 1.98    | 3.55    | -1.10 | 3.76E-01 | 2.92 | 4.78E-03 | 0.90  | 6.86E-01 | EGA3-1 |
| ENSMMUG00000017296 | SDCBP     | Syndecan Binding Protein                                     | 27.35  | 13.13  | 37.35   | 53.74   | -0.82 | 2.10E-01 | 1.43 | 1.46E-02 | -0.07 | 9.74E-01 | EGA3-1 |
| ENSMMUG00000014424 | ARFGEF1   | ADP Ribosylation Factor Guanine Nucleotide Exchange Factor 1 | 11.30  | 18.73  | 38.72   | 42.27   | 0.72  | 1.55E-01 | 0.95 | 4.76E-02 | 0.07  | 9.67E-01 | EGA3-1 |
| ENSMMUG00000041773 | FABP5     | Fatty Acid Binding Protein 5                                 | 8.88   | 9.73   | 99.42   | 266.72  | -0.36 | 6.72E-01 | 3.69 | 9.52E-10 | 1.34  | 1.51E-01 | EGA3-1 |
| ENSMMUG00000006370 | LRRCC1    | Leucine Rich Repeat And Coiled-coil Centrosomal Protein 1    | 1.84   | 2.85   | 6.36    | 6.78    | -0.21 | 8.71E-01 | 2.24 | 9.52E-03 | -0.47 | 8.28E-01 | EGA3-1 |
| ENSMMUG00000006308 | CPNE3     | Copine 3                                                     | 0.71   | 0.71   | 9.23    | 19.74   | -1.15 | 2.82E-01 | 5.24 | 1.44E-09 | 0.07  | 9.85E-01 | EGA3-1 |
| ENSMMUG00000014518 | OSGIN2    | Oxidative Stress Induced Growth Inhibitor Family Member 2    | 0.77   | 0.86   | 6.29    | 4.36    | -0.01 | 9.97E-01 | 3.51 | 1.73E-04 | -0.13 | 9.72E-01 | EGA3-1 |
| ENSMMUG00000014519 | NBN       | Nibrin                                                       | 5.64   | 4.22   | 19.11   | 11.44   | -0.40 | 6.28E-01 | 2.36 | 1.22E-04 | -0.98 | 3.51E-01 | EGA3-1 |
| ENSMMUG00000005557 | FAM92A    | Family With Sequence Similarity 92 Member A                  | 0.89   | 0.93   | 8.52    | 15.21   | 0.26  | 8.61E-01 | 3.60 | 1.18E-04 | 0.14  | 9.69E-01 | EGA3-1 |
| ENSMMUG00000014802 |           |                                                              | 0.22   | 0.19   | 1.84    | 1.13    | -0.86 | 5.00E-01 | 3.63 | 2.37E-04 | 0.18  | 9.63E-01 | EGA3-1 |
| ENSMMUG00000008804 | LOC701223 | Cytochrome B-c1 Complex Subunit 7                            | 2.96   | 6.58   | 38.75   | 36.23   | 0.25  | 8.75E-01 | 3.09 | 2.95E-03 | 0.67  | 7.90E-01 | EGA3-1 |
| ENSMMUG00000008926 | LOC702648 | Lysosomal-associated Transmembrane Protein 4B-like           | 69.02  | 71.19  | 202.68  | 144.13  | 0.05  | 9.43E-01 | 1.57 | 6.43E-05 | -0.42 | 5.98E-01 | EGA3-1 |
| ENSMMUG00000000165 | LOC703685 | Cytochrome C Oxidase Subunit 6C                              | 68.28  | 63.13  | 205.20  | 222.79  | -0.70 | 4.26E-01 | 2.47 | 4.36E-04 | 0.32  | 8.67E-01 | EGA3-1 |
| ENSMMUG00000040361 |           |                                                              | 1.18   | 0.52   | 1.12    | 4.64    | -1.99 | 6.32E-02 | 2.06 | 4.98E-02 | 1.44  | 4.00E-01 | EGA3-1 |
| ENSMMUG00000012559 | EFR3A     | EFR3 Homolog A                                               | 8.18   | 4.36   | 23.47   | 23.53   | -0.58 | 5.24E-01 | 2.74 | 9.59E-05 | -0.01 | 9.97E-01 | EGA3-1 |
| ENSMMUG00000003154 | SLC39A4   | Solute Carrier Family 39 Member 4                            | 2.06   | 2.08   | 44.38   | 51.49   | -0.13 | 9.38E-01 | 4.97 | 3.08E-07 | 1.78  | 2.64E-01 | EGA3-1 |
| ENSMMUG00000040870 | LOC721815 | 10 KDa Heat Shock Protein, Mitochondrial Pseudogene          | 199.88 | 108.84 | 1271.35 | 1935.50 | -1.10 | 1.24E-01 | 3.73 | 9.83E-10 | 0.32  | 8.52E-01 | EGA3-1 |
| ENSMMUG00000004470 | CD9       | CD9 Molecule                                                 | 2.77   | 3.48   | 10.74   | 18.62   | 0.39  | 6.78E-01 | 1.93 | 6.45E-03 | 0.51  | 7.55E-01 | EGA3-1 |
| ENSMMUG00000000377 | TNFRSF1A  | TNF Receptor Superfamily Member 1A                           | 0.63   | 0.16   | 3.93    | 3.78    | -1.94 | 9.94E-02 | 3.41 | 1.37E-03 | 0.91  | 6.93E-01 | EGA3-1 |
| ENSMMUG00000010210 |           |                                                              | 0.77   | 5.92   | 13.79   | 34.57   | 2.26  | 5.05E-02 | 2.28 | 4.27E-02 | 1.29  | 5.20E-01 | EGA3-1 |
| ENSMMUG00000005082 | MAGOHB    | Mago Homolog B, Exon Junction Complex Core Component         | 3.42   | 3.61   | 21.14   | 15.85   | -0.09 | 9.53E-01 | 3.19 | 7.35E-04 | -0.69 | 7.54E-01 | EGA3-1 |
| ENSMMUG00000013655 | DNM1L     | Dynamin 1 Like                                               | 8.13   | 6.06   | 15.92   | 15.94   | -0.59 | 3.66E-01 | 1.74 | 1.17E-03 | -0.27 | 8.52E-01 | EGA3-1 |
| ENSMMUG00000000595 | PKP2      | Plakophilin 2                                                | 1.14   | 3.94   | 12.27   | 44.36   | -1.02 | 4.48E-01 | 3.94 | 2.37E-04 | 0.96  | 6.81E-01 | EGA3-1 |
| ENSMMUG00000020269 |           |                                                              | 5.10   | 8.23   | 24.64   | 46.60   | 0.64  | 2.86E-01 | 1.61 | 1.52E-03 | 0.94  | 2.31E-01 | EGA3-1 |
| ENSMMUG00000000152 | TFCP2     | Transcription Factor CP2                                     | 8.48   | 3.94   | 16.87   | 8.75    | -1.75 | 5.56E-02 | 2.79 | 9.69E-04 | -1.32 | 3.49E-01 | EGA3-1 |
| ENSMMUG00000000329 | SPRYD3    | SPRY Domain Containing 3                                     | 0.36   | 0.77   | 2.40    | 1.32    | 0.09  | 9.61E-01 | 3.42 | 2.17E-03 | 1.10  | 6.30E-01 | EGA3-1 |
| ENSMMUG00000013225 | METTL7B   | Methyltransferase Like 7B                                    | 0.06   | 0.12   | 2.43    | 2.92    | -2.15 | 3.19E-01 | 7.03 | 4.58E-05 | 1.29  | 7.33E-01 | EGA3-1 |

|                    |           |                                                                              |        |        |         |         |       |          |      |          |       |          |        |
|--------------------|-----------|------------------------------------------------------------------------------|--------|--------|---------|---------|-------|----------|------|----------|-------|----------|--------|
| ENSMMUG00000031838 | LOC710137 | Myosin, Light Chain 6, Alkali, Smooth Muscle And Non-muscle-like             | 4.69   | 8.09   | 23.15   | 40.25   | 0.65  | 5.32E-01 | 1.83 | 3.12E-02 | 1.19  | 3.97E-01 | EGA3-1 |
| ENSMMUG00000043982 |           |                                                                              | 8.83   | 9.76   | 57.47   | 97.29   | -0.45 | 6.21E-01 | 3.25 | 1.11E-06 | 0.07  | 9.76E-01 | EGA3-1 |
| ENSMMUG00000005893 | TSFM      | Ts Translation Elongation Factor, Mitochondrial                              | 4.43   | 3.46   | 11.77   | 8.09    | -0.04 | 9.73E-01 | 2.02 | 3.81E-03 | -0.92 | 4.61E-01 | EGA3-1 |
| ENSMMUG00000016621 | TMBIM4    | Transmembrane BAX Inhibitor Motif Containing 4                               | 3.93   | 1.63   | 17.75   | 26.97   | -1.23 | 4.45E-01 | 3.16 | 1.87E-02 | 1.29  | 6.25E-01 | EGA3-1 |
| ENSMMUG00000031761 |           |                                                                              | 0.25   | 0.60   | 2.15    | 1.31    | 0.80  | 6.41E-01 | 2.67 | 4.82E-02 | -0.46 | 9.03E-01 | EGA3-1 |
| ENSMMUG00000014187 | SLC35E3   | Solute Carrier Family 35 Member E3                                           | 0.21   | 0.41   | 1.65    | 0.86    | -0.70 | 5.35E-01 | 2.98 | 6.55E-04 | -1.01 | 5.44E-01 | EGA3-1 |
| ENSMMUG00000006814 |           |                                                                              | 8.84   | 9.99   | 70.55   | 124.72  | 0.05  | 9.57E-01 | 3.04 | 1.11E-07 | 0.64  | 5.90E-01 | EGA3-1 |
| ENSMMUG00000047369 |           |                                                                              | 3.65   | 2.37   | 16.47   | 9.10    | -2.90 | 5.91E-02 | 3.43 | 1.99E-02 | -1.50 | 5.93E-01 | EGA3-1 |
| ENSMMUG00000016805 | MRPL42    | Mitochondrial Ribosomal Protein L42                                          | 11.43  | 13.13  | 40.45   | 32.48   | 0.08  | 9.53E-01 | 2.10 | 1.43E-02 | -0.58 | 7.71E-01 | EGA3-1 |
| ENSMMUG00000009302 | SNRPF     | Small Nuclear Ribonucleoprotein Polypeptide F                                | 16.21  | 8.12   | 22.27   | 15.58   | -1.19 | 9.64E-02 | 2.12 | 1.06E-03 | -0.39 | 8.10E-01 | EGA3-1 |
| ENSMMUG00000023036 | SLC25A3   | Solute Carrier Family 25 Member 3                                            | 20.61  | 34.93  | 135.27  | 118.56  | 0.54  | 5.92E-01 | 2.27 | 3.46E-03 | -0.18 | 9.47E-01 | EGA3-1 |
| ENSMMUG00000017129 | SLC41A2   | Solute Carrier Family 41 Member 2                                            | 4.38   | 12.57  | 43.47   | 35.37   | 1.42  | 5.45E-02 | 1.92 | 5.60E-03 | 0.22  | 9.17E-01 | EGA3-1 |
| ENSMMUG00000000512 | CORO1C    | Coronin 1C                                                                   | 16.14  | 10.76  | 43.29   | 35.57   | -0.43 | 2.97E-01 | 2.07 | 5.58E-10 | -0.22 | 8.03E-01 | EGA3-1 |
| ENSMMUG00000011665 | MMAB      | Methylmalonic Aciduria (cobalamin Deficiency) CblB Type                      | 1.61   | 0.60   | 3.01    | 0.88    | -2.17 | 6.18E-02 | 3.13 | 3.92E-03 | -2.14 | 1.88E-01 | EGA3-1 |
| ENSMMUG00000002223 | SH2B3     | SH2B Adaptor Protein 3                                                       | 3.17   | 1.39   | 3.52    | 2.32    | -1.74 | 5.33E-02 | 2.17 | 1.13E-02 | -0.48 | 8.18E-01 | EGA3-1 |
| ENSMMUG00000001906 | MED13L    | Mediator Complex Subunit 13 Like                                             | 16.02  | 15.60  | 28.49   | 26.76   | -0.24 | 7.64E-01 | 1.33 | 2.27E-02 | -0.21 | 8.96E-01 | EGA3-1 |
| ENSMMUG00000020601 | COQ5      | Coenzyme Q5, Methyltransferase                                               | 0.47   | 0.73   | 3.69    | 3.66    | 0.77  | 5.26E-01 | 2.70 | 5.25E-03 | -0.86 | 6.77E-01 | EGA3-1 |
| ENSMMUG00000047962 | TMED2     | Transmembrane P24 Trafficking Protein 2                                      | 34.50  | 28.86  | 82.41   | 33.51   | -0.46 | 5.05E-01 | 1.54 | 5.36E-03 | -0.95 | 2.71E-01 | EGA3-1 |
| ENSMMUG00000009207 | ATP5C1    | ATP Synthase, H+ Transporting, Mitochondrial F1 Complex, Gamma Polypeptide 1 | 19.87  | 20.68  | 78.60   | 84.37   | 0.48  | 5.25E-01 | 1.97 | 7.84E-04 | -0.39 | 7.84E-01 | EGA3-1 |
| ENSMMUG00000023632 | PROSER2   | Proline And Serine Rich 2                                                    | 0.11   | 0.30   | 2.09    | 1.26    | -0.37 | 8.89E-01 | 3.56 | 4.03E-02 | 1.76  | 5.93E-01 | EGA3-1 |
| ENSMMUG00000017173 | HSPA14    | Heat Shock Protein Family A (Hsp70) Member 14                                | 19.46  | 13.38  | 25.80   | 20.35   | -0.84 | 1.98E-01 | 1.62 | 4.80E-03 | -0.78 | 4.38E-01 | EGA3-1 |
| ENSMMUG00000023647 | SKIDA1    | SKI/DACH Domain Containing 1                                                 | 0.17   | 0.04   | 3.22    | 2.64    | -1.35 | 4.20E-01 | 5.66 | 1.64E-05 | 0.28  | 9.53E-01 | EGA3-1 |
| ENSMMUG00000005076 | PDSS1     | Decaprenyl Diphosphate Synthase Subunit 1                                    | 5.69   | 2.24   | 12.77   | 15.74   | -1.54 | 8.74E-02 | 2.44 | 3.20E-03 | -0.13 | 9.67E-01 | EGA3-1 |
| ENSMMUG00000040316 | OSTC      | Oligosaccharyltransferase Complex Non-catalytic Subunit                      | 2.24   | 1.18   | 9.35    | 12.32   | -1.52 | 1.52E-01 | 2.90 | 1.95E-03 | 1.33  | 4.13E-01 | EGA3-1 |
| ENSMMUG00000000567 | BAMBI     | BMP And Activin Membrane Bound Inhibitor                                     | 0.82   | 0.85   | 7.80    | 8.16    | 1.01  | 3.87E-01 | 3.12 | 1.05E-03 | 0.16  | 9.65E-01 | EGA3-1 |
| ENSMMUG00000030631 | LOC696316 | 10 KDa Heat Shock Protein, Mitochondrial                                     | 234.95 | 140.18 | 1533.53 | 2331.57 | -0.93 | 2.06E-01 | 3.58 | 4.58E-09 | 0.40  | 8.02E-01 | EGA3-1 |
| ENSMMUG00000002711 | LOC700258 | Cyclin-Y-like Protein 2                                                      | 0.55   | 0.41   | 1.64    | 1.24    | -1.73 | 3.67E-01 | 3.30 | 4.84E-02 | -0.25 | 9.67E-01 | EGA3-1 |
| ENSMMUG00000022075 |           |                                                                              | 10.70  | 15.99  | 62.39   | 92.29   | 0.41  | 5.33E-01 | 2.19 | 1.40E-05 | 0.08  | 9.67E-01 | EGA3-1 |
| ENSMMUG00000046605 |           |                                                                              | 18.65  | 29.06  | 99.50   | 143.81  | 0.32  | 7.71E-01 | 1.62 | 4.64E-02 | 0.36  | 8.64E-01 | EGA3-1 |
| ENSMMUG00000008694 |           |                                                                              | 0.16   | 0.01   | 0.43    | 1.64    | -3.86 | 6.51E-02 | 4.27 | 3.65E-02 | 3.21  | 2.84E-01 | EGA3-1 |
| ENSMMUG00000020825 | AP3M1     | Adaptor Related Protein Complex 3 Mu 1 Subunit                               | 18.93  | 10.77  | 24.80   | 24.67   | -0.87 | 1.23E-01 | 1.13 | 3.38E-02 | 0.44  | 6.92E-01 | EGA3-1 |
| ENSMMUG00000006414 | ATAD1     | ATPase Family, AAA Domain Containing 1                                       | 4.02   | 4.48   | 7.23    | 10.48   | -0.34 | 5.39E-01 | 0.94 | 3.93E-02 | 1.12  | 5.64E-02 | EGA3-1 |
| ENSMMUG00000029151 |           |                                                                              | 3.06   | 1.72   | 5.69    | 5.46    | -1.34 | 1.92E-01 | 2.09 | 2.62E-02 | 0.21  | 9.49E-01 | EGA3-1 |

|                      |           |                                                        |       |       |        |        |       |          |       |          |        |          |        |
|----------------------|-----------|--------------------------------------------------------|-------|-------|--------|--------|-------|----------|-------|----------|--------|----------|--------|
| ENSMMUG00000001874   | TM9SF3    | Transmembrane 9 Superfamily Member 3                   | 5.92  | 8.36  | 24.54  | 23.94  | 0.23  | 8.22E-01 | 1.83  | 8.13E-03 | 0.05   | 9.84E-01 | EGA3-1 |
| ENSMMUG000000030508  |           |                                                        | 12.25 | 19.92 | 45.51  | 73.10  | 0.11  | 9.21E-01 | 1.93  | 7.48E-03 | 0.49   | 7.74E-01 | EGA3-1 |
| ENSMMUG000000010827  | BLOC1S2   | Biogenesis Of Lysosomal Organelles Complex 1 Subunit 2 | 0.89  | 0.64  | 4.12   | 8.27   | -0.50 | 7.05E-01 | 3.02  | 1.57E-03 | 0.39   | 8.87E-01 | EGA3-1 |
| ENSMMUG000000010817  | SCD       | Stearoyl-CoA Desaturase                                | 24.18 | 43.65 | 131.21 | 139.66 | 0.78  | 1.79E-01 | 1.81  | 3.62E-04 | -0.19  | 9.02E-01 | EGA3-1 |
| ENSMMUG000000006636  |           |                                                        | 10.38 | 6.07  | 41.68  | 56.29  | -0.77 | 5.85E-01 | 2.65  | 1.87E-02 | 0.35   | 9.14E-01 | EGA3-1 |
| ENSMMUG000000003000  | CUEDC2    | CUE Domain Containing 2                                | 0.42  | 0.48  | 1.55   | 1.38   | -1.17 | 5.27E-01 | 3.35  | 2.71E-02 | -0.44  | 9.23E-01 | EGA3-1 |
| ENSMMUG000000046241  |           |                                                        | 7.92  | 15.87 | 26.78  | 31.41  | 0.77  | 2.99E-01 | 1.46  | 2.62E-02 | -0.35  | 8.28E-01 | EGA3-1 |
| ENSMMUG000000015324  | SLK       | STE20 Like Kinase                                      | 13.73 | 6.14  | 16.98  | 19.72  | -1.04 | 1.10E-01 | 1.26  | 4.19E-02 | 0.42   | 7.62E-01 | EGA3-1 |
| ENSMMUG000000015117  | XPNPEP1   | X-prolyl Aminopeptidase 1                              | 0.62  | 1.70  | 9.66   | 18.96  | 1.85  | 1.18E-01 | 2.89  | 7.55E-03 | 1.35   | 4.86E-01 | EGA3-1 |
| ENSMMUG000000010485  | OAT       | Ornithine Aminotransferase                             | 23.00 | 22.73 | 135.25 | 59.91  | -0.20 | 8.32E-01 | 2.43  | 1.04E-04 | -1.44  | 1.16E-01 | EGA3-1 |
| ENSMMUG000000008541  | BCCIP     | BRCA2 And CDKN1A Interacting Protein                   | 24.86 | 15.24 | 36.56  | 37.00  | -0.68 | 1.10E-01 | 1.19  | 2.09E-03 | 0.31   | 7.25E-01 | EGA3-1 |
| ENSMMUG000000046481  | ECHS1     | Enoyl-CoA Hydratase, Short Chain 1                     | 0.84  | 0.50  | 2.87   | 3.33   | -1.83 | 1.01E-01 | 3.34  | 8.52E-04 | -0.04  | 9.92E-01 | EGA3-1 |
| ENSMMUG000000013257  |           |                                                        | 0.82  | 0.75  | 19.62  | 55.80  | -0.74 | 5.50E-01 | 5.28  | 1.17E-08 | 1.87   | 2.01E-01 | EGA3-1 |
| ENSMMUG000000003525  | PKP3      | Plakophilin 3                                          | 0.00  | 0.00  | 0.24   | 2.48   | 1.43  | 5.91E-01 | 5.54  | 2.25E-03 | 3.48   | 1.90E-01 | EGA3-1 |
| ENSMMUG000000002917  | SIGIRR    | Single Ig And TIR Domain Containing                    | 0.08  | 0.01  | 0.80   | 1.83   | -2.60 | 3.72E-01 | 6.40  | 8.43E-03 | 1.36   | 8.16E-01 | EGA3-1 |
| ENSMMUG000000000511  | CARS      | Cysteinyl-tRNA Synthetase                              | 2.00  | 2.66  | 7.46   | 6.16   | 0.29  | 8.05E-01 | 2.33  | 4.12E-03 | -1.41  | 2.65E-01 | EGA3-1 |
| ENSMMUG000000010124  |           |                                                        | 1.50  | 2.83  | 7.43   | 5.61   | -0.33 | 8.49E-01 | 3.08  | 7.78E-03 | -1.97  | 2.75E-01 | EGA3-1 |
| ENSMMUG000000015932  | SSH3      | Slingshot Protein Phosphatase 3                        | 0.23  | 0.10  | 0.40   | 0.74   | -3.38 | 1.10E-01 | 4.05  | 4.24E-02 | 1.99   | 5.91E-01 | EGA3-1 |
| ENSMMUG000000019016  | CFL1      | Cofilin 1                                              | 51.61 | 78.39 | 128.31 | 132.25 | 0.54  | 2.28E-01 | 0.86  | 3.44E-02 | -0.20  | 8.46E-01 | EGA3-1 |
| ENSMMUG0000000031168 | SAC3D1    | SAC3 Domain Containing 1                               | 0.05  | 0.24  | 4.06   | 3.04   | 1.97  | 3.46E-01 | 4.55  | 6.06E-03 | 1.42   | 6.92E-01 | EGA3-1 |
| ENSMMUG000000017803  | ESRRA     | Estrogen Related Receptor Alpha                        | 0.15  | 0.02  | 2.25   | 2.75   | -3.52 | 6.75E-02 | 6.91  | 5.01E-05 | 0.91   | 8.33E-01 | EGA3-1 |
| ENSMMUG000000046758  |           |                                                        | 0.00  | 0.04  | 1.77   | 0.85   | 13.43 | 5.91E-02 | ##### | 8.80E-07 | -16.25 | 7.15E-02 | EGA3-1 |
| ENSMMUG000000006598  | EEF1G     | Eukaryotic Translation Elongation Factor 1 Gamma       | 22.30 | 44.06 | 114.45 | 218.46 | 0.89  | 7.32E-02 | 1.45  | 1.55E-03 | 0.86   | 2.23E-01 | EGA3-1 |
| ENSMMUG000000015281  | SDHAF2    | Succinate Dehydrogenase Complex Assembly Factor 2      | 2.91  | 2.69  | 8.68   | 10.08  | -0.95 | 4.04E-01 | 2.40  | 1.19E-02 | 0.14   | 9.68E-01 | EGA3-1 |
| ENSMMUG000000048841  |           |                                                        | 0.00  | 0.00  | 1.22   | 1.34   | 0.00  | 1.00E+00 | ##### | 2.12E-02 | 13.85  | 1.48E-01 | EGA3-1 |
| ENSMMUG000000006447  | APIP      | APAF1 Interacting Protein                              | 1.44  | 0.92  | 7.49   | 3.52   | -1.36 | 3.63E-01 | 3.64  | 3.66E-03 | -1.92  | 3.53E-01 | EGA3-1 |
| ENSMMUG000000047823  | LOC694178 | Protein S100-A11                                       | 60.04 | 50.02 | 218.84 | 149.95 | 0.28  | 7.83E-01 | 1.99  | 5.01E-03 | 1.26   | 2.48E-01 | EGA3-1 |
| ENSMMUG000000020956  |           |                                                        | 2.03  | 3.21  | 8.87   | 7.07   | 0.20  | 8.62E-01 | 2.21  | 2.97E-03 | -0.08  | 9.76E-01 | EGA3-1 |
| ENSMMUG000000016387  | ADM       | Adrenomedullin                                         | 1.07  | 0.34  | 3.46   | 6.37   | -2.46 | 9.35E-02 | 2.78  | 4.97E-02 | 1.45   | 5.80E-01 | EGA3-1 |
| ENSMMUG000000023636  | IPO7      | Importin 7                                             | 10.24 | 20.68 | 47.33  | 50.73  | 0.71  | 2.58E-01 | 1.48  | 6.96E-03 | -0.25  | 8.64E-01 | EGA3-1 |
| ENSMMUG000000007745  |           |                                                        | 1.69  | 1.51  | 4.18   | 16.20  | -2.57 | 1.00E-01 | 4.06  | 4.21E-03 | 3.24   | 1.01E-01 | EGA3-1 |
| ENSMMUG000000000335  | TRIM5     | Tripartite Motif Containing 5                          | 0.13  | 0.05  | 1.31   | 3.58   | -1.61 | 1.98E-01 | 6.30  | 7.67E-10 | 1.79   | 2.92E-01 | EGA3-1 |
| ENSMMUG000000010456  | LOC718378 | Folate Receptor Gamma-like                             | 0.08  | 0.14  | 0.50   | 0.74   | -3.32 | 1.01E-01 | 4.79  | 1.10E-02 | 0.85   | 8.52E-01 | EGA3-1 |
| ENSMMUG000000000506  | MOGAT2    | Monoacylglycerol O-acyltransferase 2                   | 0.06  | 0.15  | 3.20   | 3.05   | 1.51  | 4.05E-01 | 5.11  | 1.12E-04 | 0.69   | 8.41E-01 | EGA3-1 |
| ENSMMUG000000018174  | CAPN5     | Calpain 5                                              | 0.95  | 0.32  | 2.73   | 3.31   | -1.04 | 4.31E-01 | 2.46  | 2.70E-02 | 0.67   | 8.02E-01 | EGA3-1 |
| ENSMMUG000000007842  | RAB30     | RAB30, Member RAS Oncogene Family                      | 1.65  | 0.76  | 3.35   | 1.52   | -0.87 | 4.76E-01 | 2.09  | 4.19E-02 | -1.50  | 3.59E-01 | EGA3-1 |
| ENSMMUG000000017730  | HIKESHI   | Hikeshi, Heat Shock Protein Nuclear Import Factor      | 5.71  | 3.00  | 10.88  | 17.34  | -1.55 | 1.70E-01 | 2.27  | 2.92E-02 | 0.06   | 9.87E-01 | EGA3-1 |
| ENSMMUG000000030892  | LOC701661 | Cytochrome C Oxidase Subunit 5B, Mitochondrial         | 15.08 | 20.48 | 61.84  | 91.24  | 0.36  | 7.47E-01 | 1.95  | 1.77E-02 | 0.76   | 6.49E-01 | EGA3-1 |

|                     |           |                                                                                      |       |       |        |        |       |          |      |          |       |          |        |
|---------------------|-----------|--------------------------------------------------------------------------------------|-------|-------|--------|--------|-------|----------|------|----------|-------|----------|--------|
| ENSMMUG00000014866  | HMBS      | Hydroxymethylbilane Synthase                                                         | 0.08  | 0.17  | 2.57   | 2.39   | 0.10  | 9.67E-01 | 4.13 | 4.22E-03 | 0.82  | 8.17E-01 | EGA3-1 |
| ENSMMUG00000030886  | MRPL40    | Mitochondrial Ribosomal Protein L40                                                  | 7.60  | 6.97  | 22.08  | 15.33  | -0.49 | 7.02E-01 | 2.17 | 2.57E-02 | -0.06 | 9.86E-01 | EGA3-1 |
| ENSMMUG00000002919  | UBASH3B   | Ubiquitin Associated And SH3 Domain Containing B                                     | 0.93  | 1.10  | 17.57  | 31.68  | -0.81 | 3.98E-01 | 4.51 | 1.52E-09 | 0.59  | 7.43E-01 | EGA3-1 |
| ENSMMUG00000008481  | NRGN      | Neurogranin                                                                          | 0.16  | 0.09  | 5.66   | 5.35   | -1.09 | 5.93E-01 | 6.16 | 4.28E-05 | -0.26 | 9.64E-01 | EGA3-1 |
| ENSMMUG00000018029  | APLP2     | Amyloid Beta Precursor Like Protein 2                                                | 22.54 | 15.38 | 43.45  | 68.81  | -0.60 | 3.18E-01 | 1.49 | 3.43E-03 | 0.24  | 8.61E-01 | EGA3-1 |
| ENSMMUG00000039972  | STEAP3    | STEAP3 Metalloreductase                                                              | 0.00  | 0.16  | 0.85   | 4.12   | 2.29  | 2.74E-01 | 4.17 | 1.02E-02 | 3.46  | 1.24E-01 | EGA3-1 |
| ENSMMUG00000005633  | MMADHC    | Methylmalonic Aciduria And Homocystinuria, CbID Type                                 | 4.62  | 6.00  | 31.49  | 29.29  | 0.16  | 9.23E-01 | 2.75 | 6.88E-03 | 0.28  | 9.32E-01 | EGA3-1 |
| ENSMMUG00000044949  | RBM43     | RNA Binding Motif Protein 43                                                         | 0.19  | 0.17  | 1.27   | 1.17   | -1.57 | 2.82E-01 | 4.98 | 2.76E-05 | 1.70  | 4.31E-01 | EGA3-1 |
| ENSMMUG00000010527  | STAM2     | Signal Transducing Adaptor Molecule 2                                                | 10.09 | 6.07  | 12.68  | 6.26   | -0.97 | 1.10E-01 | 1.36 | 1.53E-02 | -0.86 | 3.45E-01 | EGA3-1 |
| ENSMMUG00000010812  | PRPF40A   | Pre-mRNA Processing Factor 40 Homolog A                                              | 22.54 | 31.89 | 46.07  | 28.65  | 0.32  | 5.35E-01 | 0.84 | 4.98E-02 | -0.75 | 2.24E-01 | EGA3-1 |
| ENSMMUG00000004897  | GPD2      | Glycerol-3-phosphate Dehydrogenase 2                                                 | 2.54  | 1.17  | 17.48  | 28.44  | -1.28 | 7.54E-02 | 3.94 | 3.97E-10 | 0.73  | 5.67E-01 | EGA3-1 |
| ENSMMUG00000011906  | PSMD14    | Proteasome 26S Subunit, Non-ATPase 14                                                | 5.80  | 7.61  | 18.25  | 19.13  | 0.28  | 7.70E-01 | 1.41 | 4.91E-02 | 0.57  | 6.96E-01 | EGA3-1 |
| ENSMMUG00000009400  | COBLL1    | Cordon-bleu WH2 Repeat Protein Like 1                                                | 22.88 | 10.61 | 37.69  | 26.30  | -1.08 | 8.39E-02 | 1.90 | 7.87E-04 | -0.75 | 4.63E-01 | EGA3-1 |
| ENSMMUG00000007092  | OLA1      | Obg Like ATPase 1                                                                    | 3.17  | 12.28 | 24.46  | 45.06  | 1.35  | 3.00E-01 | 2.51 | 2.82E-02 | -0.13 | 9.75E-01 | EGA3-1 |
| ENSMMUG00000003954  | LOC696144 | ATP Synthase, H+ Transporting, Mitochondrial Fo Complex, Subunit C3 (subunit 9)-like | 20.37 | 17.14 | 152.66 | 183.58 | -0.41 | 7.27E-01 | 3.92 | 1.36E-06 | 0.13  | 9.68E-01 | EGA3-1 |
| ENSMMUG00000010185  | MTX2      | Metaxin 2                                                                            | 0.93  | 3.70  | 11.28  | 16.01  | 1.12  | 4.37E-01 | 2.59 | 3.42E-02 | 0.45  | 8.94E-01 | EGA3-1 |
| ENSMMUG000000038947 |           |                                                                                      | 9.19  | 6.78  | 19.31  | 23.07  | -1.02 | 2.40E-01 | 2.07 | 6.55E-03 | 0.25  | 9.10E-01 | EGA3-1 |
| ENSMMUG00000008069  | UBE2E3    | Ubiquitin Conjugating Enzyme E2 E3                                                   | 20.58 | 8.50  | 24.01  | 19.86  | -1.27 | 2.43E-01 | 2.27 | 1.92E-02 | -0.63 | 7.79E-01 | EGA3-1 |
| ENSMMUG00000014394  | DNAJC10   | DnaJ Heat Shock Protein Family (Hsp40) Member C10                                    | 3.39  | 2.21  | 10.55  | 6.98   | -0.73 | 4.93E-01 | 1.97 | 2.51E-02 | 1.28  | 3.73E-01 | EGA3-1 |
| ENSMMUG00000014397  | NCKAP1    | NCK Associated Protein 1                                                             | 19.21 | 11.30 | 36.67  | 40.28  | -0.68 | 2.95E-01 | 1.73 | 1.65E-03 | 0.36  | 7.85E-01 | EGA3-1 |
| ENSMMUG00000042304  |           |                                                                                      | 0.92  | 0.64  | 1.94   | 1.79   | -1.47 | 9.65E-02 | 2.10 | 1.17E-02 | -1.02 | 4.94E-01 | EGA3-1 |
| ENSMMUG00000014316  | ORMDL1    | ORMDL Sphingolipid Biosynthesis Regulator 1                                          | 5.12  | 2.17  | 5.61   | 5.81   | -1.67 | 1.11E-01 | 2.09 | 3.50E-02 | -0.04 | 9.91E-01 | EGA3-1 |
| ENSMMUG000000023682 |           |                                                                                      | 0.27  | 0.21  | 2.24   | 5.11   | -1.16 | 3.84E-01 | 3.29 | 2.78E-03 | 1.34  | 5.09E-01 | EGA3-1 |
| ENSMMUG000000021152 |           |                                                                                      | 11.16 | 5.03  | 14.72  | 21.61  | -1.60 | 5.92E-02 | 2.28 | 4.13E-03 | -0.36 | 8.67E-01 | EGA3-1 |
| ENSMMUG00000001053  | INO80D    | INO80 Complex Subunit D                                                              | 2.79  | 4.03  | 8.43   | 6.74   | 0.20  | 8.21E-01 | 1.77 | 2.84E-03 | -1.35 | 1.06E-01 | EGA3-1 |
| ENSMMUG000000022446 |           |                                                                                      | 11.62 | 19.05 | 36.98  | 32.24  | 0.48  | 4.22E-01 | 1.12 | 2.77E-02 | -0.10 | 9.52E-01 | EGA3-1 |
| ENSMMUG00000022602  | METTL21A  | Methyltransferase Like 21A                                                           | 7.33  | 5.21  | 20.94  | 16.16  | -1.28 | 1.74E-01 | 2.59 | 1.76E-03 | -0.02 | 9.96E-01 | EGA3-1 |
| ENSMMUG000000022808 | ARPC2     | Actin Related Protein 2/3 Complex Subunit 2                                          | 24.76 | 20.23 | 40.90  | 49.03  | -0.33 | 7.08E-01 | 1.36 | 4.06E-02 | -0.35 | 8.30E-01 | EGA3-1 |
| ENSMMUG000000022817 | TMBIM1    | Transmembrane BAX Inhibitor Motif Containing 1                                       | 3.78  | 6.48  | 32.25  | 30.41  | -0.63 | 5.51E-01 | 4.07 | 2.26E-07 | -1.07 | 4.68E-01 | EGA3-1 |
| ENSMMUG00000015268  | CTDSP1    | CTD Small Phosphatase 1                                                              | 0.33  | 0.69  | 6.03   | 7.57   | 1.94  | 1.49E-01 | 2.98 | 1.43E-02 | 0.67  | 8.22E-01 | EGA3-1 |
| ENSMMUG00000009793  | CAB39     | Calcium Binding Protein 39                                                           | 12.61 | 13.54 | 60.72  | 71.43  | 0.01  | 9.94E-01 | 2.48 | 7.21E-06 | 0.18  | 9.19E-01 | EGA3-1 |
| ENSMMUG000000022150 | TIGD1     | Tigger Transposable Element Derived 1                                                | 0.21  | 0.19  | 0.65   | 0.88   | -0.57 | 7.72E-01 | 3.10 | 3.07E-02 | 0.13  | 9.81E-01 | EGA3-1 |
| ENSMMUG00000012216  | NGEF      | Neuronal Guanine Nucleotide Exchange Factor                                          | 0.02  | 0.01  | 3.77   | 9.94   | 0.82  | 6.56E-01 | 8.23 | 9.44E-14 | 0.69  | 8.03E-01 | EGA3-1 |
| ENSMMUG00000009772  | INPP5D    | Inositol Polyphosphate-5-phosphatase D                                               | 0.12  | 0.21  | 0.45   | 1.18   | -1.34 | 4.12E-01 | 3.36 | 1.40E-02 | 2.48  | 2.28E-01 | EGA3-1 |

|                     |           |                                                     |        |        |         |         |       |          |      |          |       |          |        |
|---------------------|-----------|-----------------------------------------------------|--------|--------|---------|---------|-------|----------|------|----------|-------|----------|--------|
| ENSMMUG00000013808  | SH3BP4    | SH3 Domain Binding Protein 4                        | 0.17   | 0.27   | 3.78    | 11.33   | -0.37 | 8.19E-01 | 4.89 | 3.44E-06 | 2.57  | 9.02E-02 | EGA3-1 |
| ENSMMUG00000018482  | UBE2F     | Ubiquitin Conjugating Enzyme E2 F (putative)        | 7.04   | 9.26   | 32.94   | 9.50    | 0.55  | 5.96E-01 | 1.79 | 3.22E-02 | -1.28 | 3.33E-01 | EGA3-1 |
| ENSMMUG00000018487  | KLHL30    | Kelch Like Family Member 30                         | 0.51   | 0.23   | 2.68    | 0.40    | -2.12 | 5.18E-02 | 4.64 | 2.10E-06 | -2.20 | 1.38E-01 | EGA3-1 |
| ENSMMUG00000041988  | TMEM250   | Transmembrane Protein 250                           | 0.06   | 0.11   | 4.50    | 2.09    | 0.55  | 8.06E-01 | 4.75 | 1.25E-03 | 0.62  | 8.78E-01 | EGA3-1 |
| ENSMMUG00000018468  | SETX      | Senataxin                                           | 13.13  | 13.18  | 23.46   | 15.27   | -0.24 | 6.99E-01 | 1.28 | 5.42E-03 | -0.97 | 1.42E-01 | EGA3-1 |
| ENSMMUG00000006057  | NTMT1     | N-terminal Xaa-Pro-Lys N-methyltransferase 1        | 1.12   | 2.28   | 7.92    | 2.47    | -0.06 | 9.71E-01 | 2.29 | 3.88E-02 | -0.07 | 9.86E-01 | EGA3-1 |
| ENSMMUG00000011765  | MIGA2     | Mitoguardin 2                                       | 0.20   | 0.39   | 2.20    | 0.63    | -0.91 | 5.05E-01 | 3.38 | 1.66E-03 | -1.86 | 2.76E-01 | EGA3-1 |
| ENSMMUG00000013024  |           |                                                     | 1.40   | 2.22   | 49.56   | 78.55   | 0.46  | 7.71E-01 | 5.20 | 9.47E-07 | 0.31  | 9.30E-01 | EGA3-1 |
| ENSMMUG00000005595  |           |                                                     | 4.25   | 6.66   | 18.54   | 16.75   | 0.29  | 8.18E-01 | 1.83 | 4.15E-02 | 0.20  | 9.49E-01 | EGA3-1 |
| ENSMMUG00000031992  |           |                                                     | 1.92   | 8.44   | 30.85   | 30.58   | 1.19  | 2.68E-01 | 2.63 | 4.12E-03 | 1.24  | 4.46E-01 | EGA3-1 |
| ENSMMUG00000010322  | TXN       | Thioredoxin                                         | 42.14  | 82.17  | 314.84  | 312.35  | 0.09  | 9.35E-01 | 2.71 | 1.02E-04 | 0.07  | 9.77E-01 | EGA3-1 |
| ENSMMUG00000002361  | PALM2     | Paralemmin 2                                        | 5.02   | 5.87   | 12.98   | 22.16   | 0.35  | 5.61E-01 | 1.27 | 8.57E-03 | 0.46  | 6.35E-01 | EGA3-1 |
| ENSMMUG00000002669  | FKTN      | Fukutin                                             | 0.62   | 1.44   | 4.38    | 8.80    | 1.41  | 2.03E-01 | 2.03 | 4.60E-02 | 1.97  | 1.71E-01 | EGA3-1 |
| ENSMMUG00000020608  | ABCA1     | ATP Binding Cassette Subfamily A Member 1           | 4.50   | 4.39   | 9.86    | 20.53   | -0.06 | 9.57E-01 | 1.46 | 4.85E-02 | 0.84  | 5.19E-01 | EGA3-1 |
| ENSMMUG00000004628  | IARS      | Isoleucyl-tRNA Synthetase                           | 10.72  | 14.83  | 30.78   | 23.19   | 0.41  | 5.39E-01 | 1.42 | 7.95E-03 | -0.85 | 3.24E-01 | EGA3-1 |
| ENSMMUG00000013881  | WNK2      | WNK Lysine Deficient Protein Kinase 2               | 0.52   | 0.83   | 4.55    | 2.38    | 1.37  | 1.57E-01 | 1.78 | 4.98E-02 | -0.43 | 8.52E-01 | EGA3-1 |
| ENSMMUG00000009493  | FAM120A   | Family With Sequence Similarity 120A                | 5.25   | 4.25   | 17.50   | 38.73   | -0.60 | 4.23E-01 | 2.40 | 5.35E-05 | 0.74  | 5.14E-01 | EGA3-1 |
| ENSMMUG00000008667  |           |                                                     | 0.44   | 0.34   | 1.94    | 1.80    | -1.80 | 1.65E-01 | 3.78 | 8.65E-04 | -0.83 | 7.57E-01 | EGA3-1 |
| ENSMMUG00000017886  | FBXO10    | F-box Protein 10                                    | 13.54  | 7.60   | 21.46   | 9.98    | -0.43 | 6.12E-01 | 1.47 | 2.69E-02 | -1.26 | 1.92E-01 | EGA3-1 |
| ENSMMUG00000016337  | HINT2     | Histidine Triad Nucleotide Binding Protein 2        | 8.59   | 3.60   | 14.21   | 23.16   | -1.98 | 5.02E-02 | 2.49 | 9.71E-03 | -0.38 | 8.87E-01 | EGA3-1 |
| ENSMMUG000000031830 | RPP25L    | Ribonuclease P/MRP Subunit P25 Like                 | 0.18   | 0.69   | 3.81    | 3.81    | 1.32  | 4.07E-01 | 3.64 | 3.86E-03 | 0.09  | 9.86E-01 | EGA3-1 |
| ENSMMUG00000013466  | TTC39B    | Tetratricopeptide Repeat Domain 39B                 | 1.60   | 4.53   | 7.18    | 9.81    | 0.18  | 9.08E-01 | 2.49 | 1.05E-02 | -0.57 | 8.10E-01 | EGA3-1 |
| ENSMMUG00000019570  |           |                                                     | 2.73   | 0.84   | 3.57    | 8.59    | -1.97 | 8.49E-02 | 2.32 | 3.39E-02 | 2.01  | 2.05E-01 | EGA3-1 |
| ENSMMUG00000009020  | RIC1      | RIC1 Homolog, RAB6A GEF Complex Partner 1           | 0.48   | 0.57   | 3.32    | 4.91    | 0.10  | 9.51E-01 | 3.24 | 9.16E-04 | 2.06  | 1.56E-01 | EGA3-1 |
| ENSMMUG00000003780  | TJP2      | Tight Junction Protein 2                            | 9.85   | 11.17  | 25.77   | 32.39   | -0.04 | 9.68E-01 | 1.73 | 3.23E-03 | -0.52 | 6.79E-01 | EGA3-1 |
| ENSMMUG00000008346  | SMC5      | Structural Maintenance Of Chromosomes 5             | 9.93   | 6.53   | 14.19   | 17.02   | -0.51 | 5.46E-01 | 1.45 | 3.38E-02 | -0.08 | 9.75E-01 | EGA3-1 |
| ENSMMUG00000003718  | TLE1      | Transducin Like Enhancer Of Split 1                 | 5.99   | 11.94  | 31.32   | 31.26   | 0.53  | 3.26E-01 | 1.73 | 8.87E-05 | 0.01  | 9.97E-01 | EGA3-1 |
| ENSMMUG000000027013 | MIR7-1    | MicroRNA 7-1                                        | 0.07   | 0.02   | 4.09    | 8.03    | 0.06  | 9.87E-01 | 4.92 | 4.94E-02 | 2.41  | 6.09E-01 | EGA3-1 |
| ENSMMUG00000003411  |           |                                                     | 20.17  | 42.29  | 135.79  | 144.31  | 0.24  | 8.30E-01 | 2.39 | 1.42E-03 | 0.12  | 9.65E-01 | EGA3-1 |
| ENSMMUG00000015798  | AUH       | AU RNA Binding Methylglutaconyl-CoA Hydratase       | 2.83   | 3.01   | 17.56   | 19.48   | -0.21 | 8.73E-01 | 2.39 | 5.67E-03 | -0.42 | 8.53E-01 | EGA3-1 |
| ENSMMUG00000031580  | LOC710026 | 10 KDa Heat Shock Protein, Mitochondrial Pseudogene | 227.82 | 129.91 | 1522.40 | 2340.88 | -0.95 | 1.82E-01 | 3.69 | 5.89E-10 | 0.42  | 7.79E-01 | EGA3-1 |
| ENSMMUG00000008295  | AAED1     | AhpC/TSA Antioxidant Enzyme Domain Containing 1     | 1.25   | 1.19   | 28.39   | 4.01    | 0.39  | 7.86E-01 | 2.95 | 2.93E-03 | -1.61 | 3.21E-01 | EGA3-1 |
| ENSMMUG00000046127  |           |                                                     | 102.27 | 56.65  | 670.06  | 1076.73 | -0.95 | 1.72E-01 | 3.75 | 1.24E-10 | 0.49  | 7.22E-01 | EGA3-1 |
| ENSMMUG00000014475  | RNASEH1   | Ribonuclease H1                                     | 13.94  | 12.30  | 29.79   | 16.05   | -0.35 | 7.17E-01 | 1.66 | 1.97E-02 | -0.77 | 5.60E-01 | EGA3-1 |
| ENSMMUG00000022785  | PQLC3     | PQ Loop Repeat Containing 3                         | 5.73   | 5.59   | 32.60   | 20.32   | -0.86 | 4.62E-01 | 3.17 | 6.46E-04 | -0.42 | 8.70E-01 | EGA3-1 |
| ENSMMUG00000012056  | SMC6      | Structural Maintenance Of Chromosomes 6             | 11.75  | 9.78   | 27.22   | 23.97   | -0.46 | 5.11E-01 | 1.94 | 3.91E-04 | -0.32 | 8.19E-01 | EGA3-1 |
| ENSMMUG00000001283  | TP53I3    | Tumor Protein P53 Inducible Protein 3               | 0.12   | 0.17   | 0.81    | 1.99    | -3.20 | 1.12E-01 | 3.90 | 4.52E-02 | -0.55 | 9.18E-01 | EGA3-1 |
| ENSMMUG00000020838  | NCOA1     | Nuclear Receptor Coactivator 1                      | 9.58   | 7.01   | 19.09   | 17.57   | -0.57 | 4.18E-01 | 1.74 | 2.56E-03 | -0.79 | 4.40E-01 | EGA3-1 |
| ENSMMUG00000030911  |           |                                                     | 3.97   | 2.42   | 9.00    | 14.54   | -1.05 | 2.81E-01 | 2.05 | 1.65E-02 | 0.76  | 6.64E-01 | EGA3-1 |

|                      |         |                                                                  |       |        |         |        |       |          |      |          |       |          |        |
|----------------------|---------|------------------------------------------------------------------|-------|--------|---------|--------|-------|----------|------|----------|-------|----------|--------|
| ENSMMUG00000021816   |         |                                                                  | 18.81 | 12.71  | 29.32   | 25.67  | -0.96 | 1.67E-01 | 1.43 | 2.57E-02 | -0.11 | 9.63E-01 | EGA3-1 |
| ENSMMUG00000040310   | SLC35F6 | Solute Carrier Family 35 Member F6                               | 1.08  | 0.54   | 5.07    | 11.57  | 0.25  | 8.84E-01 | 2.53 | 2.81E-02 | 0.71  | 7.91E-01 | EGA3-1 |
| ENSMMUG00000003908   | MEMO1   | Mediator Of Cell Motility 1                                      | 8.39  | 4.11   | 18.79   | 22.13  | -1.36 | 1.09E-01 | 2.82 | 1.85E-04 | -0.53 | 7.71E-01 | EGA3-1 |
| ENSMMUG000000039303  | SOCS5   | Suppressor Of Cytokine Signaling 5                               | 1.40  | 0.48   | 6.78    | 3.19   | -1.29 | 2.81E-01 | 3.42 | 6.96E-04 | 0.20  | 9.57E-01 | EGA3-1 |
| ENSMMUG000000011346  | CLHC1   | Clathrin Heavy Chain Linker Domain Containing 1                  | 0.69  | 0.63   | 1.84    | 1.33   | -1.68 | 3.37E-01 | 3.21 | 3.63E-02 | -1.65 | 5.58E-01 | EGA3-1 |
| ENSMMUG000000030833  | MTIF2   | Mitochondrial Translational Initiation Factor 2                  | 24.82 | 23.66  | 80.17   | 49.03  | -0.25 | 7.64E-01 | 2.23 | 7.04E-05 | -0.66 | 5.53E-01 | EGA3-1 |
| ENSMMUG00000007003   | PNPT1   | Polyribonucleotide Nucleotidyltransferase 1                      | 5.49  | 11.15  | 50.97   | 27.33  | 0.67  | 4.77E-01 | 2.66 | 3.34E-04 | -0.59 | 7.32E-01 | EGA3-1 |
| ENSMMUG00000006941   | XPO1    | Exportin 1                                                       | 14.25 | 21.40  | 37.89   | 36.39  | 0.53  | 3.23E-01 | 1.02 | 2.84E-02 | 0.08  | 9.64E-01 | EGA3-1 |
| ENSMMUG000000013973  | CCT4    | Chaperonin Containing TCP1 Subunit 4                             | 6.78  | 20.04  | 98.51   | 85.01  | 1.30  | 8.94E-02 | 2.42 | 4.38E-04 | -0.16 | 9.50E-01 | EGA3-1 |
| ENSMMUG000000013797  | GFPT1   | Glutamine-fructose-6-phosphate Transaminase 1                    | 4.56  | 10.34  | 33.80   | 28.25  | 1.34  | 9.54E-02 | 2.20 | 2.68E-03 | -1.28 | 2.65E-01 | EGA3-1 |
| ENSMMUG00000007959   | PCYOX1  | Prenylcysteine Oxidase 1                                         | 4.82  | 7.46   | 24.81   | 27.34  | 0.78  | 3.84E-01 | 1.83 | 1.61E-02 | -0.08 | 9.76E-01 | EGA3-1 |
| ENSMMUG00000007961   | SNRPG   | Small Nuclear Ribonucleoprotein Polypeptide G                    | 13.40 | 37.24  | 93.38   | 59.15  | 1.04  | 2.46E-01 | 1.83 | 2.22E-02 | -0.15 | 9.60E-01 | EGA3-1 |
| ENSMMUG00000000908   | SUCLG1  | Succinate-CoA Ligase Alpha Subunit                               | 9.44  | 9.92   | 28.01   | 29.56  | 0.09  | 9.41E-01 | 1.89 | 1.02E-02 | -0.11 | 9.68E-01 | EGA3-1 |
| ENSMMUG000000020134  | TCF7L1  | Transcription Factor 7 Like 1                                    | 0.31  | 0.61   | 6.03    | 14.48  | 1.74  | 1.70E-01 | 4.33 | 6.44E-05 | 0.00  | 9.99E-01 | EGA3-1 |
| ENSMMUG000000014248  |         |                                                                  | 24.45 | 29.63  | 63.56   | 27.30  | -0.35 | 7.45E-01 | 1.74 | 2.97E-02 | -1.89 | 7.30E-02 | EGA3-1 |
| ENSMMUG000000044883  |         |                                                                  | 0.09  | 0.36   | 1.24    | 2.32   | 1.14  | 5.02E-01 | 2.93 | 2.69E-02 | 2.47  | 2.18E-01 | EGA3-1 |
| ENSMMUG000000007590  | CNNM4   | Cyclin And CBS Domain Divalent Metal Cation Transport Mediator 4 | 0.83  | 0.67   | 4.54    | 1.87   | -0.63 | 6.24E-01 | 3.33 | 5.98E-04 | -1.52 | 3.51E-01 | EGA3-1 |
| ENSMMUG000000007596  |         |                                                                  | 0.05  | 0.03   | 1.14    | 1.05   | -2.20 | 3.63E-01 | 5.75 | 3.45E-03 | 2.31  | 4.87E-01 | EGA3-1 |
| ENSMMUG000000049088  | COA5    | Protein C2orf64                                                  | 2.23  | 1.51   | 8.61    | 3.84   | -0.24 | 8.72E-01 | 2.71 | 5.70E-03 | -0.57 | 8.12E-01 | EGA3-1 |
| ENSMMUG000000030696  |         |                                                                  | 36.14 | 31.40  | 114.95  | 90.19  | 0.40  | 6.78E-01 | 1.66 | 2.35E-02 | 1.65  | 9.56E-02 | EGA3-1 |
| ENSMMUG000000019682  | MRPS9   | Mitochondrial Ribosomal Protein S9                               | 25.83 | 14.97  | 40.20   | 19.18  | -0.83 | 1.04E-01 | 1.41 | 2.48E-03 | -0.77 | 3.04E-01 | EGA3-1 |
| ENSMMUG0000000039390 |         |                                                                  | 90.24 | 202.45 | 1175.21 | 434.98 | 1.22  | 5.57E-02 | 1.56 | 9.47E-03 | -1.06 | 2.49E-01 | EGA3-1 |
| ENSMMUG000000012115  | ANAPC1  | Anaphase Promoting Complex Subunit 1                             | 19.77 | 8.99   | 33.34   | 29.95  | -0.81 | 2.70E-01 | 1.83 | 3.61E-03 | 0.07  | 9.75E-01 | EGA3-1 |
| ENSMMUG000000019777  | IL1A    | Interleukin 1 Alpha                                              | 0.06  | 0.08   | 1.63    | 0.91   | -2.26 | 3.19E-01 | 5.71 | 2.66E-03 | -4.12 | 1.31E-01 | EGA3-1 |
| ENSMMUG000000019006  | LATS2   | Large Tumor Suppressor Kinase 2                                  | 3.08  | 1.29   | 4.50    | 5.18   | -1.30 | 1.71E-01 | 2.44 | 4.00E-03 | -0.49 | 8.12E-01 | EGA3-1 |
| ENSMMUG000000041640  |         |                                                                  | 1.37  | 0.62   | 1.65    | 2.41   | -1.63 | 1.10E-01 | 2.18 | 2.31E-02 | 0.42  | 8.72E-01 | EGA3-1 |
| ENSMMUG000000020835  |         |                                                                  | 40.58 | 60.79  | 135.29  | 162.20 | 0.44  | 8.23E-02 | 1.40 | 1.92E-10 | 0.18  | 7.29E-01 | EGA3-1 |
| ENSMMUG000000043480  |         |                                                                  | 0.00  | 0.36   | 3.57    | 0.83   | 1.83  | 5.41E-01 | 4.54 | 4.71E-02 | -0.60 | 9.31E-01 | EGA3-1 |
| ENSMMUG000000009913  | RFXAP   | Regulatory Factor X Associated Protein                           | 0.16  | 0.14   | 3.80    | 8.63   | 0.43  | 8.61E-01 | 5.84 | 6.23E-05 | -0.24 | 9.65E-01 | EGA3-1 |
| ENSMMUG000000022585  |         |                                                                  | 0.35  | 0.07   | 1.80    | 1.68   | -3.33 | 1.83E-01 | 5.06 | 2.57E-02 | 0.94  | 8.74E-01 | EGA3-1 |
| ENSMMUG000000017978  |         |                                                                  | 7.01  | 4.63   | 23.23   | 10.31  | -0.79 | 5.58E-01 | 2.70 | 1.16E-02 | -1.35 | 4.77E-01 | EGA3-1 |
| ENSMMUG000000004209  | ESD     | Esterase D                                                       | 2.53  | 4.31   | 25.71   | 27.63  | 1.27  | 3.08E-01 | 2.67 | 1.35E-02 | 0.01  | 9.99E-01 | EGA3-1 |
| ENSMMUG000000007539  | SUCLA2  | Succinate-CoA Ligase ADP-forming Beta Subunit                    | 7.28  | 14.20  | 32.57   | 36.21  | -0.16 | 8.85E-01 | 1.57 | 3.59E-02 | 1.17  | 3.15E-01 | EGA3-1 |
| ENSMMUG000000007888  | ITM2B   | Integral Membrane Protein 2B                                     | 22.04 | 29.09  | 92.55   | 130.76 | 0.10  | 8.93E-01 | 2.04 | 7.41E-06 | 0.43  | 6.63E-01 | EGA3-1 |
| ENSMMUG000000043607  |         |                                                                  | 4.46  | 5.24   | 14.85   | 15.06  | -1.02 | 4.07E-01 | 2.51 | 1.53E-02 | 1.12  | 5.65E-01 | EGA3-1 |
| ENSMMUG000000040500  | DNAJC3  | DnaJ Heat Shock Protein Family (Hsp40) Member C3                 | 1.66  | 0.98   | 4.22    | 4.85   | -0.81 | 4.31E-01 | 2.46 | 3.28E-03 | 0.59  | 7.66E-01 | EGA3-1 |
| ENSMMUG000000013625  | ATP11A  | ATPase Phospholipid Transporting 11A                             | 2.47  | 1.78   | 6.22    | 27.11  | -0.72 | 4.46E-01 | 1.68 | 3.67E-02 | 1.51  | 1.90E-01 | EGA3-1 |
| ENSMMUG000000019297  | CUL4A   | Cullin 4A                                                        | 4.01  | 8.79   | 29.53   | 21.60  | 1.11  | 1.45E-01 | 2.14 | 1.66E-03 | -0.54 | 7.21E-01 | EGA3-1 |



|                    |             |                                                                             |        |        |        |        |       |          |      |          |       |          |        |
|--------------------|-------------|-----------------------------------------------------------------------------|--------|--------|--------|--------|-------|----------|------|----------|-------|----------|--------|
| ENSMMUG0000007439  | CDC16       | Cell Division Cycle 16                                                      | 8.13   | 7.03   | 33.06  | 20.74  | -0.46 | 5.75E-01 | 1.98 | 1.75E-03 | -0.66 | 5.99E-01 | EGA3-1 |
| ENSMMUG00000031416 | LAMA5       | Laminin Subunit Alpha 5                                                     | 0.20   | 0.34   | 6.24   | 13.39  | 0.97  | 4.08E-01 | 4.88 | 9.79E-08 | -0.02 | 9.95E-01 | EGA3-1 |
| ENSMMUG00000017300 | PFDN4       | Prefoldin Subunit 4                                                         | 4.76   | 6.00   | 21.45  | 16.66  | -0.79 | 4.72E-01 | 3.30 | 1.28E-04 | -0.52 | 8.14E-01 | EGA3-1 |
| ENSMMUG00000045219 | CEBPB       | CCAAT/enhancer Binding Protein Beta                                         | 1.21   | 0.49   | 3.90   | 1.58   | -2.60 | 9.82E-02 | 4.31 | 2.41E-03 | -1.90 | 4.70E-01 | EGA3-1 |
| ENSMMUG00000019636 | CSE1L       | Chromosome Segregation 1 Like                                               | 33.63  | 65.18  | 144.17 | 135.62 | 0.89  | 1.28E-01 | 1.16 | 3.41E-02 | -0.10 | 9.60E-01 | EGA3-1 |
| ENSMMUG00000019635 | ARFGEF2     | ADP Ribosylation Factor Guanine Nucleotide Exchange Factor 2                | 9.04   | 5.97   | 13.10  | 14.40  | -0.67 | 3.26E-01 | 1.23 | 4.22E-02 | -0.26 | 8.67E-01 | EGA3-1 |
| ENSMMUG00000007317 | ZNF334      | Zinc Finger Protein 334                                                     | 0.90   | 0.54   | 3.24   | 1.92   | -1.77 | 2.52E-01 | 3.30 | 1.52E-02 | 1.26  | 6.47E-01 | EGA3-1 |
| ENSMMUG00000048424 | SDC4        | Syndecan 4                                                                  | 0.11   | 0.13   | 9.71   | 22.12  | -1.65 | 2.86E-01 | 6.77 | 2.66E-08 | 1.26  | 5.91E-01 | EGA3-1 |
| ENSMMUG00000013206 | YWHAH       | Tyrosine 3-monooxygenase/tryptophan 5-monooxygenase Activation Protein Beta | 42.96  | 30.53  | 71.66  | 71.64  | -0.71 | 3.84E-01 | 1.47 | 3.65E-02 | 0.29  | 8.78E-01 | EGA3-1 |
| ENSMMUG00000013969 | SERINC3     | Serine Incorporator 3                                                       | 20.01  | 28.10  | 87.45  | 72.30  | 0.71  | 3.57E-01 | 1.56 | 1.85E-02 | -0.04 | 9.87E-01 | EGA3-1 |
| ENSMMUG00000013968 | TTPAL       | Alpha Tocopherol Transfer Protein Like                                      | 0.93   | 0.78   | 4.17   | 1.68   | -2.20 | 1.74E-01 | 4.30 | 2.61E-03 | -1.70 | 5.24E-01 | EGA3-1 |
| ENSMMUG00000003385 | DHX35       | DEAH-box Helicase 35                                                        | 5.12   | 3.17   | 8.82   | 15.95  | -1.63 | 8.24E-02 | 1.82 | 4.34E-02 | 1.96  | 1.04E-01 | EGA3-1 |
| ENSMMUG00000046563 | LOC703853   | 60S Ribosomal Protein L37                                                   | 260.68 | 388.56 | 753.13 | 491.68 | 0.62  | 1.72E-01 | 0.90 | 3.23E-02 | -0.22 | 8.28E-01 | EGA3-1 |
| ENSMMUG00000010403 | LOC705546   | Ubiquinol-cytochrome-c Reductase Complex Assembly Factor 1                  | 0.66   | 1.15   | 2.81   | 2.07   | -0.16 | 9.15E-01 | 2.28 | 1.39E-02 | -0.73 | 7.18E-01 | EGA3-1 |
| ENSMMUG00000017940 | GSS         | Glutathione Synthetase                                                      | 0.98   | 0.71   | 1.73   | 3.27   | -1.55 | 3.18E-01 | 2.89 | 3.53E-02 | -1.11 | 6.96E-01 | EGA3-1 |
| ENSMMUG00000018095 | EIF2S2      | Eukaryotic Translation Initiation Factor 2 Subunit Beta                     | 60.86  | 50.15  | 140.98 | 114.62 | -0.30 | 6.07E-01 | 1.81 | 2.42E-05 | -0.54 | 5.10E-01 | EGA3-1 |
| ENSMMUG00000012600 | TRIB3       | Tribbles Pseudokinase 3                                                     | 0.01   | 0.01   | 1.43   | 0.37   | 0.36  | 9.09E-01 | 7.33 | 5.30E-05 | -4.51 | 7.60E-02 | EGA3-1 |
| ENSMMUG00000021670 | SLC52A3     | Solute Carrier Family 52 Member 3                                           | 0.00   | 0.00   | 0.27   | 1.06   | 1.15  | 7.52E-01 | 5.21 | 3.95E-02 | 2.39  | 6.19E-01 | EGA3-1 |
| ENSMMUG00000003633 | SLC4A11     | Solute Carrier Family 4 Member 11                                           | 1.13   | 1.97   | 10.82  | 2.96   | 0.05  | 9.79E-01 | 3.48 | 1.72E-03 | -2.64 | 8.86E-02 | EGA3-1 |
| ENSMMUG00000044755 |             |                                                                             | 3.39   | 8.49   | 17.99  | 12.10  | 1.22  | 8.28E-02 | 1.54 | 1.98E-02 | -0.60 | 6.60E-01 | EGA3-1 |
| ENSMMUG00000045636 |             |                                                                             | 2.18   | 3.15   | 49.60  | 10.89  | -0.29 | 9.02E-01 | 4.02 | 6.58E-03 | -1.29 | 6.81E-01 | EGA3-1 |
| ENSMMUG00000021137 | TMX4        | Thioredoxin Related Transmembrane Protein 4                                 | 1.57   | 1.60   | 11.95  | 27.53  | -0.26 | 8.68E-01 | 3.08 | 2.48E-03 | 0.06  | 9.86E-01 | EGA3-1 |
| ENSMMUG00000009201 | ABHD12      | Abhydrolase Domain Containing 12                                            | 3.82   | 7.97   | 37.74  | 57.97  | 0.54  | 7.03E-01 | 2.38 | 2.52E-02 | 1.38  | 4.47E-01 | EGA3-1 |
| ENSMMUG00000011569 |             |                                                                             | 1.87   | 2.21   | 6.67   | 6.39   | -0.04 | 9.73E-01 | 1.88 | 1.54E-02 | 0.48  | 7.94E-01 | EGA3-1 |
| ENSMMUG00000021376 | GAS2L1      | Growth Arrest Specific 2 Like 1                                             | 0.07   | 0.46   | 2.81   | 3.37   | 0.43  | 8.20E-01 | 5.59 | 1.82E-06 | 1.78  | 3.94E-01 | EGA3-1 |
| ENSMMUG00000039346 | APOBEC3G    | Apolipoprotein B MRNA Editing Enzyme Catalytic Subunit 3G                   | 0.29   | 0.34   | 3.82   | 4.56   | -1.84 | 2.53E-01 | 4.24 | 2.01E-03 | 1.78  | 4.71E-01 | EGA3-1 |
| ENSMMUG00000006059 | TTL12       | Tubulin Tyrosine Ligase Like 12                                             | 1.08   | 1.31   | 7.21   | 8.46   | 0.19  | 8.45E-01 | 2.36 | 2.02E-04 | 0.23  | 9.04E-01 | EGA3-1 |
| ENSMMUG00000015446 | SAMM50      | SAMM50 Sorting And Assembly Machinery Component                             | 1.88   | 1.83   | 4.61   | 6.70   | 0.09  | 9.30E-01 | 1.37 | 3.48E-02 | 0.21  | 9.11E-01 | EGA3-1 |
| ENSMMUG00000008331 | PLXNB2      | Plexin B2                                                                   | 0.85   | 1.38   | 7.90   | 8.43   | 0.72  | 5.65E-01 | 2.28 | 2.49E-02 | 1.13  | 5.44E-01 | EGA3-1 |
| ENSMMUG00000003121 | CPT1B       | Carnitine Palmitoyltransferase 1B                                           | 0.07   | 0.06   | 0.74   | 0.70   | -0.75 | 7.40E-01 | 3.87 | 1.62E-02 | 0.76  | 8.51E-01 | EGA3-1 |
| ENSMMUG00000011341 | KIF1C       | Kinesin Family Member 1C                                                    | 0.73   | 1.02   | 2.18   | 4.73   | -0.34 | 7.82E-01 | 1.96 | 2.47E-02 | 0.59  | 7.65E-01 | EGA3-1 |
| ENSMMUG00000016266 | C16H17orf49 | Chromosome 16 Open Reading Frame, Human C17orf49                            | 4.08   | 1.76   | 6.85   | 3.01   | -1.87 | 1.32E-01 | 2.85 | 1.25E-02 | -2.32 | 1.58E-01 | EGA3-1 |
| ENSMMUG00000042228 |             |                                                                             | 0.71   | 1.41   | 4.94   | 5.52   | 0.83  | 3.92E-01 | 2.35 | 2.78E-03 | 0.18  | 9.50E-01 | EGA3-1 |
| ENSMMUG00000013503 |             |                                                                             | 2.35   | 2.39   | 12.32  | 14.00  | -0.44 | 7.46E-01 | 2.17 | 2.79E-02 | 1.89  | 1.83E-01 | EGA3-1 |
| ENSMMUG00000013513 | SHBG        | Sex Hormone Binding Globulin                                                | 0.05   | 0.26   | 5.11   | 1.29   | -0.08 | 9.83E-01 | 4.79 | 3.31E-02 | -2.00 | 6.53E-01 | EGA3-1 |

|                    |           |                                                                   |       |       |       |       |       |          |      |          |       |          |        |
|--------------------|-----------|-------------------------------------------------------------------|-------|-------|-------|-------|-------|----------|------|----------|-------|----------|--------|
| ENSMMUG00000014039 | USP43     | Ubiquitin Specific Peptidase 43                                   | 2.68  | 2.44  | 10.07 | 15.48 | -0.41 | 6.58E-01 | 2.50 | 2.78E-04 | 0.46  | 7.87E-01 | EGA3-1 |
| ENSMMUG00000008050 | HS3ST3A1  | Heparan Sulfate-glucosamine 3-sulfotransferase 3A1                | 0.00  | 0.06  | 0.96  | 0.79  | 2.24  | 3.12E-01 | 5.52 | 1.01E-03 | 0.35  | 9.52E-01 | EGA3-1 |
| ENSMMUG00000002206 | PMP22     | Peripheral Myelin Protein 22                                      | 0.00  | 0.00  | 0.52  | 1.59  | 1.28  | 6.15E-01 | 6.48 | 1.23E-04 | 1.80  | 5.71E-01 | EGA3-1 |
| ENSMMUG00000008949 | TTC19     | Tetratricopeptide Repeat Domain 19                                | 3.16  | 1.47  | 9.17  | 9.88  | -2.00 | 8.03E-02 | 3.47 | 8.01E-04 | 0.90  | 6.92E-01 | EGA3-1 |
| ENSMMUG00000013535 | SHMT1     | Serine Hydroxymethyltransferase 1                                 | 0.99  | 2.85  | 12.55 | 9.27  | 1.60  | 1.74E-01 | 2.75 | 9.57E-03 | -1.72 | 3.06E-01 | EGA3-1 |
| ENSMMUG00000030279 | AKAP10    | A-kinase Anchoring Protein 10                                     | 2.89  | 3.16  | 9.20  | 10.68 | -0.61 | 6.34E-01 | 2.64 | 7.07E-03 | -0.17 | 9.63E-01 | EGA3-1 |
| ENSMMUG00000046171 | MTMR4     | Myotubularin Related Protein 4                                    | 1.94  | 1.53  | 3.99  | 2.42  | -0.97 | 2.23E-01 | 2.03 | 3.35E-03 | -0.61 | 6.82E-01 | EGA3-1 |
| ENSMMUG00000017226 | XYLT2     | Xylosyltransferase 2                                              | 0.29  | 0.40  | 5.10  | 1.62  | 0.26  | 8.87E-01 | 5.36 | 1.58E-06 | -2.04 | 2.63E-01 | EGA3-1 |
| ENSMMUG00000008870 | SLC35B1   | Solute Carrier Family 35 Member B1                                | 5.92  | 4.01  | 8.45  | 6.08  | -0.73 | 2.75E-01 | 1.45 | 1.39E-02 | -0.65 | 5.55E-01 | EGA3-1 |
| ENSMMUG00000002436 | PHOSPHO1  | Phosphoethanolamine/p-hosphocholine Phosphatase                   | 2.04  | 4.06  | 18.32 | 20.04 | 1.00  | 3.27E-01 | 1.87 | 3.84E-02 | -0.03 | 9.94E-01 | EGA3-1 |
| ENSMMUG00000030213 |           |                                                                   | 7.57  | 4.41  | 19.86 | 23.97 | -1.67 | 6.38E-02 | 2.28 | 7.22E-03 | 0.20  | 9.46E-01 | EGA3-1 |
| ENSMMUG00000007799 | LASP1     | LIM And SH3 Protein 1                                             | 13.70 | 14.29 | 94.68 | 77.81 | -0.27 | 6.98E-01 | 2.92 | 8.32E-10 | -0.14 | 9.28E-01 | EGA3-1 |
| ENSMMUG00000001348 | ERBB2     | Erb-b2 Receptor Tyrosine Kinase 2                                 | 0.66  | 0.66  | 1.95  | 3.76  | 0.34  | 7.71E-01 | 1.75 | 3.95E-02 | 1.16  | 4.08E-01 | EGA3-1 |
| ENSMMUG00000018931 | ACLY      | ATP Citrate Lyase                                                 | 8.61  | 17.57 | 22.90 | 22.74 | 0.55  | 3.08E-01 | 1.20 | 1.01E-02 | -0.57 | 4.95E-01 | EGA3-1 |
| ENSMMUG00000008459 | PLEKHM1   | Pleckstrin Homology And RUN Domain Containing M1                  | 5.95  | 2.84  | 10.17 | 7.83  | -0.86 | 2.39E-01 | 1.98 | 1.58E-03 | -1.10 | 2.66E-01 | EGA3-1 |
| ENSMMUG00000040031 |           |                                                                   | 0.18  | 0.64  | 1.27  | 1.05  | 0.93  | 5.31E-01 | 2.42 | 4.20E-02 | -1.91 | 3.50E-01 | EGA3-1 |
| ENSMMUG00000008726 | NACA2     | Nascent Polypeptide Associated Complex Alpha Subunit 2            | 9.01  | 13.49 | 28.16 | 20.10 | 0.57  | 3.37E-01 | 1.07 | 4.18E-02 | -0.24 | 8.57E-01 | EGA3-1 |
| ENSMMUG00000007242 | INTS2     | Integrator Complex Subunit 2                                      | 0.66  | 1.18  | 4.64  | 4.94  | 0.55  | 6.35E-01 | 2.39 | 7.23E-03 | 0.32  | 9.02E-01 | EGA3-1 |
| ENSMMUG00000011647 | ATP5H     | ATP Synthase, H+ Transporting, Mitochondrial Fo Complex Subunit D | 30.55 | 50.73 | 94.43 | 87.54 | 0.62  | 3.36E-01 | 1.22 | 3.13E-02 | -0.35 | 7.94E-01 | EGA3-1 |
| ENSMMUG00000021765 | GALK1     | Galactokinase 1                                                   | 0.13  | 0.20  | 1.18  | 1.16  | 0.46  | 8.45E-01 | 4.06 | 8.36E-03 | -1.80 | 5.21E-01 | EGA3-1 |
| ENSMMUG00000014172 | ACOX1     | Acyl-CoA Oxidase 1                                                | 2.17  | 3.00  | 5.99  | 6.59  | -0.16 | 9.10E-01 | 1.98 | 3.13E-02 | -0.76 | 6.92E-01 | EGA3-1 |
| ENSMMUG00000003452 |           |                                                                   | 0.30  | 0.24  | 5.05  | 2.80  | -0.98 | 6.97E-01 | 4.65 | 1.01E-02 | -1.78 | 6.18E-01 | EGA3-1 |
| ENSMMUG00000003292 | SLC38A10  | Solute Carrier Family 38 Member 10                                | 0.28  | 0.42  | 1.60  | 2.36  | 0.56  | 6.95E-01 | 2.54 | 1.74E-02 | -0.75 | 7.57E-01 | EGA3-1 |
| ENSMMUG00000004457 | SLC25A10  | Solute Carrier Family 25 Member 10                                | 0.70  | 3.21  | 8.01  | 6.30  | 1.17  | 2.51E-01 | 1.82 | 4.84E-02 | -0.03 | 9.92E-01 | EGA3-1 |
| ENSMMUG00000009242 | P4HB      | Prolyl 4-hydroxylase Subunit Beta                                 | 15.87 | 18.63 | 38.87 | 53.06 | 0.11  | 8.68E-01 | 1.24 | 5.47E-03 | 0.58  | 4.65E-01 | EGA3-1 |
| ENSMMUG00000012895 | PYCR1     | Pyrroline-5-carboxylate Reductase 1                               | 0.07  | 0.11  | 0.46  | 1.14  | -1.95 | 2.90E-01 | 3.69 | 1.96E-02 | 2.70  | 2.46E-01 | EGA3-1 |
| ENSMMUG00000010892 | LRRC45    | Leucine Rich Repeat Containing 45                                 | 0.14  | 0.00  | 0.48  | 1.19  | -3.94 | 7.45E-02 | 6.25 | 1.97E-03 | 1.35  | 7.73E-01 | EGA3-1 |
| ENSMMUG0000000588  | RHBDF1    | Rhomboid 5 Homolog 1                                              | 0.24  | 0.17  | 0.91  | 1.72  | -2.19 | 1.76E-01 | 4.36 | 2.03E-03 | 1.44  | 6.03E-01 | EGA3-1 |
| ENSMMUG00000000613 | RAB11FIP3 | RAB11 Family Interacting Protein 3                                | 0.63  | 0.28  | 1.73  | 1.25  | -1.66 | 2.31E-01 | 3.41 | 4.82E-03 | -1.05 | 6.84E-01 | EGA3-1 |
| ENSMMUG00000002807 |           |                                                                   | 0.65  | 0.23  | 1.76  | 1.31  | -2.37 | 1.31E-01 | 3.08 | 3.50E-02 | 1.38  | 6.23E-01 | EGA3-1 |
| ENSMMUG00000001890 | NUDT16L1  | Nudix Hydrolase 16 Like 1                                         | 0.19  | 0.75  | 2.54  | 1.12  | -2.04 | 4.06E-01 | 5.70 | 4.71E-03 | 0.55  | 9.32E-01 | EGA3-1 |
| ENSMMUG00000020056 | LOC713693 | Mpv17-like Protein                                                | 0.44  | 2.82  | 10.36 | 7.53  | 1.13  | 4.39E-01 | 2.48 | 4.67E-02 | -0.46 | 8.93E-01 | EGA3-1 |
| ENSMMUG00000006604 | COQ7      | Coenzyme Q7, Hydroxylase                                          | 0.29  | 1.37  | 6.14  | 10.48 | 0.71  | 5.57E-01 | 3.60 | 6.77E-05 | 1.26  | 4.41E-01 | EGA3-1 |
| ENSMMUG00000013331 | GDE1      | Glycerophosphodiester Phosphodiesterase 1                         | 0.78  | 2.61  | 10.52 | 13.96 | 0.51  | 5.27E-01 | 3.56 | 2.63E-09 | -0.38 | 8.09E-01 | EGA3-1 |

|                     |           |                                                                                                      |       |       |        |        |       |          |      |          |       |          |        |
|---------------------|-----------|------------------------------------------------------------------------------------------------------|-------|-------|--------|--------|-------|----------|------|----------|-------|----------|--------|
| ENSMMUG00000017304  | NDUFAB1   | NADH:ubiquinone<br>Oxidoreductase Subunit<br>AB1                                                     | 7.23  | 4.51  | 8.97   | 6.64   | -0.86 | 9.17E-02 | 1.36 | 3.66E-03 | -0.56 | 5.19E-01 | EGA3-1 |
| ENSMMUG00000014271  | PRKCB     | Protein Kinase C Beta                                                                                | 0.22  | 0.08  | 1.22   | 1.25   | -1.83 | 3.00E-01 | 3.66 | 1.73E-02 | -0.52 | 9.04E-01 | EGA3-1 |
| ENSMMUG00000000707  | APOBR     | Apolipoprotein B<br>Receptor                                                                         | 0.07  | 0.04  | 0.98   | 1.44   | -2.95 | 1.09E-01 | 5.98 | 2.76E-04 | -0.39 | 9.42E-01 | EGA3-1 |
| ENSMMUG00000008253  | ZNF267    | Zinc Finger Protein 267                                                                              | 5.56  | 2.35  | 6.45   | 7.20   | -1.06 | 2.77E-01 | 1.98 | 2.13E-02 | 0.03  | 9.94E-01 | EGA3-1 |
| ENSMMUG00000011940  | VPS35     | VPS35, Retromer<br>Complex Component                                                                 | 15.78 | 13.91 | 29.02  | 32.76  | -0.43 | 4.61E-01 | 1.22 | 1.08E-02 | 0.08  | 9.64E-01 | EGA3-1 |
| ENSMMUG00000003288  | GPT2      | Glutamic-pyruvic<br>Transaminase 2                                                                   | 1.75  | 0.85  | 6.78   | 6.69   | -0.92 | 3.90E-01 | 3.36 | 1.00E-04 | -0.53 | 8.11E-01 | EGA3-1 |
| ENSMMUG00000018978  | N4BP1     | NEDD4 Binding Protein 1                                                                              | 1.80  | 1.88  | 4.51   | 7.07   | -0.23 | 8.15E-01 | 1.82 | 7.95E-03 | 0.12  | 9.62E-01 | EGA3-1 |
| ENSMMUG00000003116  | PAPD5     | Poly(A) RNA Polymerase<br>D5, Non-canonical                                                          | 11.22 | 11.04 | 19.81  | 14.41  | -0.18 | 7.47E-01 | 1.25 | 1.40E-03 | -0.94 | 8.66E-02 | EGA3-1 |
| ENSMMUG00000038082  |           |                                                                                                      | 3.78  | 4.33  | 15.62  | 37.75  | -0.27 | 8.52E-01 | 2.13 | 3.41E-02 | 1.40  | 3.95E-01 | EGA3-1 |
| ENSMMUG00000010378  | MT1L      | Metallothionein 1L,<br>Pseudogene                                                                    | 9.18  | 6.42  | 34.62  | 130.77 | -1.58 | 1.87E-01 | 2.58 | 1.74E-02 | 2.50  | 8.88E-02 | EGA3-1 |
| ENSMMUG00000020847  | CMTM3     | CKLF Like MARVEL<br>Transmembrane Domain<br>Containing 3                                             | 0.15  | 0.05  | 0.43   | 1.16   | -2.36 | 2.07E-01 | 4.69 | 3.72E-03 | 1.45  | 6.60E-01 | EGA3-1 |
| ENSMMUG00000006752  | NAE1      | NEDD8 Activating Enzyme<br>E1 Subunit 1                                                              | 3.28  | 4.26  | 15.67  | 19.48  | 0.04  | 9.73E-01 | 1.85 | 4.97E-03 | 0.49  | 7.41E-01 | EGA3-1 |
| ENSMMUG00000011896  |           |                                                                                                      | 0.25  | 1.18  | 6.62   | 4.79   | -0.27 | 9.12E-01 | 5.59 | 5.52E-05 | -0.33 | 9.48E-01 | EGA3-1 |
| ENSMMUG00000016634  | TMED6     | Transmembrane P24<br>Trafficking Protein 6                                                           | 0.03  | 1.13  | 2.65   | 0.91   | 1.23  | 6.15E-01 | 4.91 | 7.48E-03 | 0.07  | 9.92E-01 | EGA3-1 |
| ENSMMUG00000046007  |           |                                                                                                      | 4.87  | 13.68 | 37.35  | 27.38  | 1.13  | 2.62E-01 | 2.10 | 1.78E-02 | -0.28 | 9.12E-01 | EGA3-1 |
| ENSMMUG00000013086  | ATMIN     | ATM Interactor                                                                                       | 21.79 | 18.37 | 35.21  | 26.69  | -0.48 | 4.75E-01 | 1.14 | 4.57E-02 | -0.52 | 6.41E-01 | EGA3-1 |
| ENSMMUG00000017161  | ANKRD11   | Ankyrin Repeat Domain<br>11                                                                          | 14.53 | 10.32 | 27.22  | 29.32  | -0.50 | 5.61E-01 | 1.63 | 1.72E-02 | -0.21 | 9.17E-01 | EGA3-1 |
| ENSMMUG00000047345  |           |                                                                                                      | 0.03  | 0.12  | 1.86   | 3.37   | -0.66 | 8.82E-01 | 6.03 | 3.59E-02 | -0.14 | 9.89E-01 | EGA3-1 |
| ENSMMUG00000019893  | MYL12A    | Myosin, Light Chain 12A,<br>Regulatory, Non-<br>sarcomeric                                           | 18.20 | 10.28 | 42.83  | 54.52  | -0.58 | 4.28E-01 | 2.04 | 6.10E-04 | 0.53  | 6.85E-01 | EGA3-1 |
| ENSMMUG00000004054  | YES1      | YES Proto-oncogene 1, Src<br>Family Tyrosine Kinase                                                  | 38.29 | 18.36 | 51.81  | 48.08  | -1.24 | 9.34E-02 | 1.73 | 1.22E-02 | -0.48 | 7.60E-01 | EGA3-1 |
| ENSMMUG00000021095  | DSG2      | Desmoglein 2                                                                                         | 12.31 | 17.65 | 41.36  | 31.11  | 0.04  | 9.51E-01 | 1.59 | 2.26E-04 | -0.37 | 7.01E-01 | EGA3-1 |
| ENSMMUG00000000457  | GALNT1    | Polypeptide N-<br>acetylgalactosaminyltran<br>sferase 1                                              | 2.45  | 2.45  | 7.79   | 4.92   | -0.55 | 6.02E-01 | 2.30 | 5.13E-03 | -0.97 | 5.26E-01 | EGA3-1 |
| ENSMMUG00000003570  | ATP5A1    | ATP Synthase, H+<br>Transporting,<br>Mitochondrial F1<br>Complex, Alpha Subunit<br>1, Cardiac Muscle | 54.99 | 31.98 | 153.32 | 214.36 | -0.72 | 1.51E-01 | 2.24 | 1.55E-07 | 0.39  | 6.81E-01 | EGA3-1 |
| ENSMMUG00000038933  |           |                                                                                                      | 20.44 | 28.28 | 156.17 | 410.15 | 0.79  | 4.05E-01 | 2.32 | 3.00E-03 | 1.75  | 1.15E-01 | EGA3-1 |
| ENSMMUG00000018837  | RPL17     | Ribosomal Protein L17                                                                                | 20.10 | 42.41 | 93.67  | 88.80  | 0.94  | 6.05E-02 | 1.56 | 6.71E-04 | -0.56 | 5.20E-01 | EGA3-1 |
| ENSMMUG00000004431  |           |                                                                                                      | 0.62  | 1.62  | 52.10  | 337.18 | 1.15  | 3.27E-01 | 3.43 | 3.18E-04 | 2.46  | 5.80E-02 | EGA3-1 |
| ENSMMUG00000004408  | SEC11C    | SEC11 Homolog C, Signal<br>Peptidase Complex<br>Subunit                                              | 0.84  | 0.96  | 5.02   | 3.75   | -0.79 | 5.81E-01 | 2.90 | 1.00E-02 | 0.02  | 9.97E-01 | EGA3-1 |
| ENSMMUG000000032514 | LOC697334 | Small Nuclear<br>Ribonucleoprotein G<br>Pseudogene                                                   | 19.93 | 47.86 | 143.76 | 91.88  | 0.89  | 3.26E-01 | 2.15 | 5.35E-03 | -0.27 | 9.05E-01 | EGA3-1 |
| ENSMMUG00000002209  | KIAA1468  | KIAA1468 Ortholog                                                                                    | 1.09  | 2.47  | 5.83   | 11.37  | 1.12  | 1.66E-01 | 1.60 | 3.33E-02 | 1.23  | 2.80E-01 | EGA3-1 |
| ENSMMUG00000006578  | KDSR      | 3-<br>ketodihydrosphingosine<br>Reductase                                                            | 1.53  | 2.14  | 9.63   | 3.91   | -1.24 | 1.44E-01 | 3.74 | 2.66E-07 | -1.33 | 2.62E-01 | EGA3-1 |
| ENSMMUG00000032496  |           |                                                                                                      | 63.00 | 35.58 | 385.47 | 612.78 | -0.95 | 1.75E-01 | 3.65 | 5.44E-10 | 0.45  | 7.53E-01 | EGA3-1 |
| ENSMMUG00000022104  |           |                                                                                                      | 2.67  | 3.10  | 6.01   | 3.82   | -1.59 | 2.71E-01 | 2.55 | 4.96E-02 | 1.44  | 5.33E-01 | EGA3-1 |
| ENSMMUG00000009014  | MBD3      | Methyl-CpG Binding<br>Domain Protein 3                                                               | 0.30  | 1.08  | 3.44   | 7.08   | 0.50  | 6.52E-01 | 2.51 | 2.40E-03 | 0.80  | 6.38E-01 | EGA3-1 |
| ENSMMUG00000042809  | MYDGF     | Myeloid Derived Growth<br>Factor                                                                     | 0.48  | 0.65  | 3.10   | 3.89   | -0.35 | 8.03E-01 | 2.52 | 1.00E-02 | 2.08  | 1.33E-01 | EGA3-1 |
| ENSMMUG00000037584  | ZNF558    | Zinc Finger Protein 558                                                                              | 0.73  | 0.37  | 2.18   | 1.39   | -1.20 | 4.21E-01 | 3.16 | 1.11E-02 | -0.47 | 8.95E-01 | EGA3-1 |

|                    |             |                                                                                      |         |         |        |        |       |          |      |          |       |          |        |
|--------------------|-------------|--------------------------------------------------------------------------------------|---------|---------|--------|--------|-------|----------|------|----------|-------|----------|--------|
| ENSMMUG00000007729 | ILVBL       | IlvB Acetolactate Synthase Like                                                      | 0.64    | 0.50    | 4.48   | 1.89   | -1.48 | 2.19E-01 | 2.86 | 7.04E-03 | 0.20  | 9.60E-01 | EGA3-1 |
| ENSMMUG00000015783 | TPM4        | Tropomyosin 4                                                                        | 12.77   | 18.12   | 108.65 | 285.05 | 0.83  | 3.83E-01 | 2.44 | 1.99E-03 | 1.88  | 8.67E-02 | EGA3-1 |
| ENSMMUG00000000195 | PGLS        | 6-phosphogluconolactonase                                                            | 0.47    | 0.63    | 2.17   | 5.60   | -0.76 | 6.87E-01 | 3.00 | 3.93E-02 | -1.15 | 7.01E-01 | EGA3-1 |
| ENSMMUG00000043638 |             |                                                                                      | 5.18    | 8.21    | 16.45  | 14.34  | 0.10  | 9.11E-01 | 1.35 | 1.91E-02 | 0.75  | 4.53E-01 | EGA3-1 |
| ENSMMUG00000021690 | C19H19orf12 | Chromosome 19 Open Reading Frame, Human C19orf12                                     | 0.14    | 0.74    | 3.33   | 2.57   | 1.59  | 3.84E-01 | 3.22 | 3.92E-02 | -0.42 | 9.31E-01 | EGA3-1 |
| ENSMMUG00000011319 | KCTD15      | Potassium Channel Tetramerization Domain Containing 15                               | 0.66    | 0.65    | 1.69   | 1.64   | -1.32 | 3.25E-01 | 2.95 | 1.01E-02 | 1.62  | 4.05E-01 | EGA3-1 |
| ENSMMUG00000005884 | UBA2        | Ubiquitin Like Modifier Activating Enzyme 2                                          | 13.38   | 25.00   | 43.67  | 43.46  | 0.36  | 5.54E-01 | 1.61 | 5.97E-04 | -0.04 | 9.81E-01 | EGA3-1 |
| ENSMMUG00000019753 | APLP1       | Amyloid Beta Precursor Like Protein 1                                                | 0.10    | 0.40    | 2.63   | 7.38   | 1.48  | 3.16E-01 | 3.64 | 3.04E-03 | 0.61  | 8.51E-01 | EGA3-1 |
| ENSMMUG00000000522 | POLR2I      | RNA Polymerase II Subunit I                                                          | 3.55    | 5.45    | 12.81  | 9.71   | -1.03 | 3.40E-01 | 2.29 | 1.39E-02 | -1.04 | 5.51E-01 | EGA3-1 |
| ENSMMUG00000000523 | TBCB        | Tubulin Folding Cofactor B                                                           | 2.08    | 6.21    | 14.46  | 10.15  | 1.31  | 1.95E-01 | 2.51 | 4.75E-03 | -0.92 | 5.99E-01 | EGA3-1 |
| ENSMMUG00000028785 | ZNF146      | Zinc Finger Protein 146                                                              | 14.22   | 9.32    | 20.31  | 26.60  | -0.40 | 5.33E-01 | 1.09 | 4.04E-02 | 0.18  | 9.03E-01 | EGA3-1 |
| ENSMMUG00000028772 | PPP1R14A    | Protein Phosphatase 1 Regulatory Inhibitor Subunit 14A                               | 0.05    | 0.07    | 10.08  | 2.31   | 1.19  | 5.26E-01 | 5.66 | 1.67E-05 | 0.80  | 8.13E-01 | EGA3-1 |
| ENSMMUG00000028743 | FKRP        | Fukutin Related Protein                                                              | 0.24    | 0.17    | 2.05   | 2.05   | -1.39 | 3.80E-01 | 6.27 | 5.47E-07 | -1.75 | 4.42E-01 | EGA3-1 |
| ENSMMUG00000001519 | KIR2DL4     | Killer Cell Immunoglobulin Like Receptor, Two Ig Domains And Long Cytoplasmic Tail 4 | 0.00    | 0.12    | 4.41   | 3.17   | 2.46  | 2.55E-01 | 5.74 | 6.91E-04 | -1.92 | 5.54E-01 | EGA3-1 |
| ENSMMUG00000005266 | NLRP7       | NLR Family Pyrin Domain Containing 7                                                 | 81.88   | 71.68   | 392.56 | 661.75 | -0.78 | 2.68E-01 | 2.92 | 4.84E-07 | 0.32  | 8.36E-01 | EGA3-1 |
| ENSMMUG00000046378 | ZFY         | Zinc Finger Protein, Y-linked                                                        | 0.05    | 0.26    | 0.59   | 1.96   | 0.94  | 5.67E-01 | 2.59 | 4.98E-02 | 1.92  | 3.54E-01 | EGA3-1 |
| ENSMMUG00000028699 | ND1         | NADH Dehydrogenase Subunit 1                                                         | 7774.75 | #####   | #####  | #####  | 1.18  | 1.11E-01 | 2.07 | 1.92E-03 | -0.62 | 6.61E-01 | EGA3-1 |
| ENSMMUG00000028695 | ND2         | NADH Dehydrogenase Subunit 2                                                         | 8141.42 | #####   | #####  | #####  | 1.06  | 1.89E-01 | 2.55 | 2.43E-04 | -0.91 | 4.80E-01 | EGA3-1 |
| ENSMMUG00000028686 | COX2        | Cytochrome C Oxidase Subunit II                                                      | #####   | #####   | #####  | #####  | 0.98  | 1.71E-01 | 1.55 | 1.74E-02 | 0.41  | 7.90E-01 | EGA3-1 |
| ENSMMUG00000028683 | ATP6        | ATP Synthase FO Subunit 6                                                            | 4706.97 | #####   | #####  | #####  | 1.10  | 1.71E-01 | 2.39 | 6.89E-04 | 0.66  | 6.60E-01 | EGA3-1 |
| ENSMMUG00000028682 | COX3        | Cytochrome C Oxidase Subunit III                                                     | 6019.36 | #####   | #####  | #####  | 0.92  | 2.53E-01 | 1.83 | 9.33E-03 | 0.79  | 5.53E-01 | EGA3-1 |
| ENSMMUG00000028680 | ND3         | NADH Dehydrogenase Subunit 3                                                         | 2084.70 | 5470.01 | #####  | #####  | 1.24  | 1.19E-01 | 2.85 | 4.56E-05 | -1.21 | 2.91E-01 | EGA3-1 |
| ENSMMUG00000028678 | ND4L        | NADH Dehydrogenase Subunit 4L                                                        | #####   | #####   | #####  | #####  | 0.89  | 2.89E-01 | 2.47 | 4.60E-04 | -0.21 | 9.29E-01 | EGA3-1 |
| ENSMMUG00000028677 | ND4         | NADH Dehydrogenase Subunit 4                                                         | #####   | #####   | #####  | #####  | 0.99  | 2.10E-01 | 2.39 | 4.08E-04 | -0.25 | 9.00E-01 | EGA3-1 |
| ENSMMUG00000028670 | CYTB        | Cytochrome B                                                                         | 6452.39 | #####   | #####  | #####  | 0.79  | 3.63E-01 | 2.11 | 3.90E-03 | 0.01  | 9.97E-01 | EGA3-1 |
| ENSMMUG00000038531 | LOC694126   | Zinc Finger Protein 257-like                                                         | 19.27   | 38.01   | 63.94  | 52.82  | 0.91  | 7.41E-02 | 1.02 | 3.77E-02 | -0.13 | 9.32E-01 | EGA3-1 |
| ENSMMUG00000040833 |             |                                                                                      | 0.01    | 0.06    | 1.11   | 2.90   | 2.16  | 2.31E-01 | 5.96 | 9.29E-06 | 0.48  | 9.05E-01 | EGA3-1 |
| ENSMMUG00000044460 |             |                                                                                      | 0.00    | 0.79    | 2.77   | 5.48   | 2.95  | 7.63E-02 | 4.45 | 6.41E-04 | 0.34  | 9.38E-01 | EGA3-1 |
| ENSMMUG00000049201 |             |                                                                                      | 0.45    | 0.09    | 0.92   | 3.18   | -2.63 | 1.22E-01 | 3.75 | 1.74E-02 | 1.21  | 7.21E-01 | EGA3-1 |
| ENSMMUG00000038665 |             |                                                                                      | 4.49    | 3.91    | 10.41  | 7.90   | -0.45 | 6.63E-01 | 1.66 | 3.98E-02 | -0.50 | 7.92E-01 | EGA3-1 |
| ENSMMUG00000042590 |             |                                                                                      | 3.69    | 1.22    | 5.17   | 6.54   | -1.27 | 4.18E-01 | 2.73 | 4.46E-02 | 0.91  | 7.65E-01 | EGA3-1 |
| ENSMMUG00000044758 |             |                                                                                      | 6.37    | 2.92    | 7.89   | 10.02  | -1.37 | 1.32E-01 | 2.33 | 4.87E-03 | -0.51 | 8.03E-01 | EGA3-1 |
| ENSMMUG00000042212 | DUT         | Deoxyuridine Triphosphatase                                                          | 8.68    | 5.84    | 14.60  | 10.68  | -0.93 | 1.70E-01 | 1.80 | 2.86E-03 | -0.56 | 6.54E-01 | EGA3-1 |
| ENSMMUG00000038507 | DUT         | Deoxyuridine Triphosphatase                                                          | 8.68    | 5.84    | 14.59  | 10.68  | -0.93 | 1.69E-01 | 1.80 | 2.86E-03 | -0.56 | 6.54E-01 | EGA3-1 |

|                    |          |                                                                        |        |       |        |         |        |          |       |          |       |          |        |
|--------------------|----------|------------------------------------------------------------------------|--------|-------|--------|---------|--------|----------|-------|----------|-------|----------|--------|
| ENSMMUG00000047531 | DUT      | Deoxyuridine Triphosphatase                                            | 9.73   | 7.36  | 17.59  | 13.30   | -0.79  | 2.18E-01 | 1.83  | 1.14E-03 | -0.56 | 6.29E-01 | EGA3-1 |
| ENSMMUG00000029693 |          |                                                                        | 0.00   | 0.35  | 1.08   | 0.58    | 0.38   | 9.24E-01 | 6.09  | 9.47E-03 | 0.52  | 9.48E-01 | EGA3-1 |
| ENSMMUG00000045979 |          |                                                                        | 22.64  | 73.49 | 154.16 | 130.08  | 1.32   | 9.17E-02 | 1.82  | 1.22E-02 | -0.61 | 6.91E-01 | EGA3-1 |
| ENSMMUG00000047065 |          |                                                                        | 13.31  | 9.68  | 37.00  | 15.44   | -1.06  | 1.92E-01 | 2.57  | 2.55E-04 | -0.88 | 5.10E-01 | EGA3-1 |
| ENSMMUG00000039665 |          |                                                                        | 0.44   | 0.10  | 1.02   | 1.55    | -3.19  | 1.32E-01 | 4.59  | 1.94E-02 | 0.77  | 8.78E-01 | EGA3-1 |
| ENSMMUG00000049171 |          |                                                                        | 102.22 | 56.67 | 669.92 | 1076.21 | -0.95  | 1.72E-01 | 3.75  | 1.24E-10 | 0.49  | 7.22E-01 | EGA3-1 |
| ENSMMUG00000040835 |          |                                                                        | 7.17   | 4.94  | 18.71  | 32.36   | -0.60  | 6.44E-01 | 2.04  | 4.77E-02 | 0.99  | 6.14E-01 | EGA3-1 |
| ENSMMUG0000006988  |          |                                                                        | 9.01   | 21.50 | 40.08  | 66.11   | 1.05   | 5.46E-02 | 1.29  | 1.29E-02 | 0.53  | 5.99E-01 | EGA3-1 |
| ENSMMUG00000043190 |          |                                                                        | 13.25  | 15.60 | 51.69  | 66.33   | 0.03   | 9.80E-01 | 2.25  | 6.50E-03 | 0.47  | 8.16E-01 | EGA3-1 |
| ENSMMUG00000014009 |          |                                                                        | 45.33  | 62.39 | 394.60 | 1021.38 | 0.74   | 4.41E-01 | 2.49  | 1.50E-03 | 1.91  | 7.64E-02 | EGA3-1 |
| ENSMMUG00000043022 |          |                                                                        | 0.71   | 1.37  | 14.41  | 11.37   | 0.65   | 6.88E-01 | 4.20  | 1.68E-04 | 0.60  | 8.42E-01 | EGA3-1 |
| ENSMMUG00000018916 |          |                                                                        | 0.41   | 0.10  | 1.63   | 1.01    | -5.92  | 3.91E-03 | 8.45  | 1.86E-05 | -2.47 | 4.90E-01 | EGA3-2 |
| ENSMMUG00000041004 |          |                                                                        | 1.86   | 0.02  | 2.76   | 2.41    | -6.70  | 4.40E-04 | 6.63  | 5.45E-04 | -0.58 | 9.15E-01 | EGA3-2 |
| ENSMMUG00000012733 | FBXO42   | F-box Protein 42                                                       | 2.20   | 0.93  | 2.24   | 5.25    | -2.86  | 1.75E-02 | 2.75  | 2.09E-02 | 0.12  | 9.78E-01 | EGA3-2 |
| ENSMMUG00000006697 | AKR7A2   | Aldo-keto Reductase Family 7, Member A2 (aflatoxin Aldehyde Reductase) | 3.41   | 0.26  | 3.48   | 5.34    | -3.95  | 4.74E-04 | 4.63  | 2.89E-05 | -0.46 | 8.85E-01 | EGA3-2 |
| ENSMMUG00000012700 | PIGV     | Phosphatidylinositol Glycan Anchor Biosynthesis Class V                | 0.88   | 0.37  | 1.65   | 1.32    | -2.09  | 2.51E-02 | 2.79  | 1.64E-03 | -0.20 | 9.48E-01 | EGA3-2 |
| ENSMMUG00000023397 | PEF1     | Penta-EF-hand Domain Containing 1                                      | 5.05   | 1.81  | 4.53   | 5.77    | -2.94  | 2.60E-03 | 2.50  | 1.11E-02 | 0.76  | 7.26E-01 | EGA3-2 |
| ENSMMUG00000005992 | ZMPSTE24 | Zinc Metallopeptidase STE24                                            | 7.68   | 1.98  | 6.74   | 7.15    | -1.93  | 1.92E-03 | 1.95  | 1.63E-03 | -0.51 | 7.11E-01 | EGA3-2 |
| ENSMMUG00000009234 | ZNF684   | Zinc Finger Protein 684                                                | 2.54   | 0.66  | 1.80   | 1.10    | -1.90  | 9.03E-03 | 1.48  | 4.78E-02 | -0.84 | 5.29E-01 | EGA3-2 |
| ENSMMUG00000044175 |          |                                                                        | 0.14   | 0.14  | 0.63   | 2.64    | -5.46  | 9.77E-03 | 5.08  | 1.73E-02 | -0.35 | 9.64E-01 | EGA3-2 |
| ENSMMUG00000013126 | PPCS     | Phosphopantothenoylcysteine Synthetase                                 | 8.64   | 0.64  | 7.00   | 10.42   | -4.80  | 1.86E-06 | 3.62  | 5.02E-04 | 0.39  | 8.98E-01 | EGA3-2 |
| ENSMMUG00000020049 | PGM1     | Phosphoglucomutase 1                                                   | 0.86   | 0.23  | 4.77   | 5.39    | -3.23  | 2.05E-02 | 5.31  | 3.74E-05 | 0.76  | 8.15E-01 | EGA3-2 |
| ENSMMUG00000039930 |          |                                                                        | 2.19   | 1.05  | 7.97   | 11.20   | -1.62  | 8.46E-03 | 3.24  | 1.36E-08 | 0.57  | 6.41E-01 | EGA3-2 |
| ENSMMUG00000000931 | SLC35A3  | Solute Carrier Family 35 Member A3                                     | 3.35   | 0.78  | 5.63   | 6.05    | -2.04  | 1.74E-02 | 3.25  | 5.03E-05 | -0.81 | 6.26E-01 | EGA3-2 |
| ENSMMUG00000007706 | DBT      | Dihydrolipoamide Branched Chain Transacylase E2                        | 1.18   | 0.25  | 2.51   | 3.58    | -2.80  | 2.02E-02 | 2.73  | 2.21E-02 | 0.97  | 6.98E-01 | EGA3-2 |
| ENSMMUG00000019105 | RTCA     | RNA 3'-terminal Phosphate Cyclase                                      | 3.54   | 0.49  | 2.51   | 16.47   | -4.88  | 5.20E-05 | 3.21  | 1.18E-02 | 1.95  | 3.32E-01 | EGA3-2 |
| ENSMMUG00000014486 | RAP1A    | RAP1A, Member Of RAS Oncogene Family                                   | 183.41 | 30.42 | 130.30 | 143.80  | -2.77  | 5.10E-08 | 2.33  | 7.32E-06 | 0.25  | 8.65E-01 | EGA3-2 |
| ENSMMUG00000027219 | MIR554   | MicroRNA 554                                                           | 0.26   | 0.00  | 1.46   | 0.28    | -17.40 | 1.07E-02 | ##### | 2.35E-02 | 15.46 | 9.19E-02 | EGA3-2 |
| ENSMMUG00000019547 | UBE2Q1   | Ubiquitin Conjugating Enzyme E2 Q1                                     | 16.22  | 3.47  | 8.77   | 8.83    | -2.91  | 4.75E-05 | 1.94  | 9.72E-03 | 0.32  | 8.76E-01 | EGA3-2 |
| ENSMMUG00000023144 | FDPS     | Farnesyl Diphosphate Synthase                                          | 4.80   | 1.82  | 7.66   | 16.85   | -2.09  | 3.88E-02 | 2.89  | 2.32E-03 | 1.77  | 2.23E-01 | EGA3-2 |
| ENSMMUG00000048590 | RNF187   | Ring Finger Protein 187                                                | 3.26   | 1.36  | 9.77   | 8.65    | -1.96  | 4.26E-02 | 3.54  | 5.88E-05 | 0.57  | 7.97E-01 | EGA3-2 |
| ENSMMUG00000002142 | NENF     | Neudessin Neurotrophic Factor                                          | 1.59   | 0.06  | 2.44   | 6.43    | -5.97  | 3.05E-07 | 5.87  | 4.84E-07 | 1.52  | 4.64E-01 | EGA3-2 |
| ENSMMUG00000016857 | PTGS2    | Prostaglandin-endoperoxide Synthase 2                                  | 2.00   | 0.03  | 0.77   | 0.34    | -6.27  | 5.28E-06 | 4.87  | 5.60E-04 | -0.75 | 8.37E-01 | EGA3-2 |
| ENSMMUG00000040608 |          |                                                                        | 0.44   | 0.13  | 2.00   | 1.20    | -4.86  | 9.16E-05 | 5.38  | 1.09E-05 | 1.25  | 6.27E-01 | EGA3-2 |
| ENSMMUG00000005888 | TTC13    | Tetratricopeptide Repeat Domain 13                                     | 0.44   | 0.04  | 0.76   | 2.50    | -4.67  | 8.72E-04 | 5.12  | 1.79E-04 | 2.49  | 2.30E-01 | EGA3-2 |
| ENSMMUG00000005801 | GNPAT    | Glyceronephosphate O-acyltransferase                                   | 5.25   | 1.64  | 4.20   | 1.72    | -1.71  | 9.19E-03 | 1.41  | 3.39E-02 | -1.08 | 2.92E-01 | EGA3-2 |
| ENSMMUG00000020334 | PROS1    | Protein S                                                              | 0.35   | 0.07  | 0.60   | 2.13    | -5.03  | 3.35E-04 | 4.07  | 4.17E-03 | 3.27  | 8.84E-02 | EGA3-2 |
| ENSMMUG00000019933 | TATDN2   | TatD DNase Domain Containing 2                                         | 4.30   | 2.41  | 5.84   | 6.69    | -1.68  | 1.02E-02 | 1.83  | 4.18E-03 | 0.66  | 6.01E-01 | EGA3-2 |
| ENSMMUG00000018285 | CRELD1   | Cysteine Rich With EGF Like Domains 1                                  | 0.34   | 0.07  | 1.46   | 0.88    | -2.90  | 2.47E-02 | 3.79  | 1.80E-03 | 1.94  | 3.23E-01 | EGA3-2 |
| ENSMMUG00000006120 | CAMK1    | Calcium/calmodulin Dependent Protein Kinase I                          | 4.04   | 0.35  | 3.48   | 5.07    | -4.18  | 6.14E-03 | 4.17  | 5.70E-03 | 0.20  | 9.71E-01 | EGA3-2 |

|                    |           |                                                       |       |       |       |       |        |          |       |          |       |          |        |
|--------------------|-----------|-------------------------------------------------------|-------|-------|-------|-------|--------|----------|-------|----------|-------|----------|--------|
| ENSMMUG00000004734 | SUMF1     | Sulfatase Modifying Factor 1                          | 0.80  | 0.30  | 2.41  | 5.52  | -4.01  | 6.97E-03 | 6.30  | 6.82E-06 | -0.85 | 8.09E-01 | EGA3-2 |
| ENSMMUG00000017370 | SPCS1     | Signal Peptidase Complex Subunit 1                    | 20.39 | 7.89  | 62.50 | 72.66 | -1.69  | 4.95E-02 | 3.64  | 2.59E-06 | -0.17 | 9.52E-01 | EGA3-2 |
| ENSMMUG00000003650 | TMEM42    | Transmembrane Protein 42                              | 0.88  | 0.29  | 4.81  | 2.07  | -4.18  | 4.31E-03 | 7.18  | 2.25E-07 | -2.93 | 1.80E-01 | EGA3-2 |
| ENSMMUG00000010552 | DCUN1D1   | Defective In Cullin Neddylation 1 Domain Containing 1 | 6.87  | 2.03  | 19.59 | 7.28  | -1.85  | 1.95E-02 | 2.10  | 6.30E-03 | -0.61 | 7.17E-01 | EGA3-2 |
| ENSMMUG00000037938 | C2H3orf33 | Chromosome 2 Open Reading Frame, Human C3orf33        | 0.76  | 0.24  | 0.58  | 0.36  | -3.03  | 1.53E-03 | 2.99  | 1.81E-03 | -1.58 | 3.04E-01 | EGA3-2 |
| ENSMMUG00000045385 |           |                                                       | 3.84  | 0.95  | 4.23  | 3.99  | -2.27  | 1.55E-04 | 2.70  | 4.50E-06 | -0.04 | 9.87E-01 | EGA3-2 |
| ENSMMUG00000001443 | CMTM6     | CKLF Like MARVEL Transmembrane Domain Containing 6    | 14.46 | 2.46  | 6.91  | 17.48 | -2.79  | 4.97E-04 | 1.88  | 2.49E-02 | 0.44  | 8.28E-01 | EGA3-2 |
| ENSMMUG00000009091 | MTPP      | Microsomal Triglyceride Transfer Protein              | 0.06  | 0.01  | 0.11  | 1.12  | -6.33  | 5.45E-04 | 7.02  | 1.06E-04 | 3.18  | 2.49E-01 | EGA3-2 |
| ENSMMUG00000001841 | SETD7     | SET Domain Containing Lysine Methyltransferase 7      | 0.75  | 0.40  | 0.72  | 1.07  | -3.65  | 2.09E-02 | 3.58  | 1.99E-02 | 2.20  | 3.76E-01 | EGA3-2 |
| ENSMMUG00000041723 |           |                                                       | 1.04  | 0.60  | 9.42  | 0.47  | -5.47  | 1.65E-02 | 6.65  | 2.43E-03 | -2.94 | 4.58E-01 | EGA3-2 |
| ENSMMUG00000046352 | PTTG1IP   | PTTG1 Interacting Protein                             | 10.19 | 5.38  | 14.52 | 12.92 | -1.45  | 2.15E-02 | 1.51  | 1.46E-02 | 0.71  | 5.33E-01 | EGA3-2 |
| ENSMMUG00000004173 | PFKL      | Phosphofructokinase, Liver Type                       | 0.57  | 0.19  | 7.80  | 15.23 | -3.31  | 5.66E-03 | 7.75  | 8.61E-13 | 1.57  | 4.31E-01 | EGA3-2 |
| ENSMMUG00000003961 | IFNAR1    | Interferon Alpha And Beta Receptor Subunit 1          | 2.13  | 0.49  | 7.30  | 5.00  | -2.94  | 7.03E-03 | 4.24  | 3.76E-05 | 0.93  | 6.79E-01 | EGA3-2 |
| ENSMMUG00000015545 | ZDHHC4    | Zinc Finger DHHC-type Containing 4                    | 1.64  | 0.72  | 2.35  | 2.63  | -3.72  | 5.30E-03 | 2.86  | 3.62E-02 | 1.62  | 4.92E-01 | EGA3-2 |
| ENSMMUG00000023063 | BCL7B     | BCL Tumor Suppressor 7B                               | 6.91  | 1.95  | 8.47  | 6.68  | -2.10  | 2.79E-02 | 2.09  | 2.59E-02 | 0.35  | 8.93E-01 | EGA3-2 |
| ENSMMUG00000001143 | CLDN3     | Claudin 3                                             | 0.20  | 0.25  | 5.60  | 17.15 | -6.26  | 1.23E-02 | 6.90  | 4.95E-03 | 0.53  | 9.48E-01 | EGA3-2 |
| ENSMMUG00000032597 |           |                                                       | 0.73  | 0.16  | 5.95  | 12.57 | -2.47  | 4.42E-02 | 4.94  | 6.07E-06 | 1.98  | 2.37E-01 | EGA3-2 |
| ENSMMUG00000003433 | SLC26A5   | Solute Carrier Family 26 Member 5                     | 0.51  | 0.04  | 0.68  | 0.88  | -3.60  | 1.81E-02 | 3.67  | 1.39E-02 | 1.08  | 7.45E-01 | EGA3-2 |
| ENSMMUG00000007097 | TES       | Testin LIM Domain Protein                             | 32.67 | 11.19 | 37.61 | 22.92 | -1.51  | 2.11E-02 | 1.36  | 3.69E-02 | -0.66 | 5.90E-01 | EGA3-2 |
| ENSMMUG00000002273 | ATP6V0E2  | ATPase H+ Transporting V0 Subunit E2                  | 1.48  | 0.16  | 0.32  | 0.50  | -5.26  | 1.10E-05 | 2.71  | 3.71E-02 | -0.07 | 9.87E-01 | EGA3-2 |
| ENSMMUG00000020456 | SLC4A2    | Solute Carrier Family 4 Member 2                      | 2.03  | 0.63  | 3.30  | 4.73  | -1.82  | 7.40E-03 | 2.73  | 2.25E-05 | -0.41 | 8.03E-01 | EGA3-2 |
| ENSMMUG00000015040 | SREK1IP1  | SREK1 Interacting Protein 1                           | 50.23 | 21.97 | 52.01 | 16.07 | -2.09  | 2.55E-02 | 2.09  | 2.38E-02 | -1.61 | 2.47E-01 | EGA3-2 |
| ENSMMUG00000007683 | ERBIN     | ErbB2 Interacting Protein                             | 16.76 | 7.95  | 15.21 | 14.71 | -1.09  | 1.98E-02 | 1.14  | 1.29E-02 | -0.42 | 6.58E-01 | EGA3-2 |
| ENSMMUG00000023513 | ANKRA2    | Ankyrin Repeat Family A Member 2                      | 7.61  | 0.82  | 3.45  | 3.28  | -4.72  | 4.72E-05 | 3.10  | 1.09E-02 | -0.29 | 9.45E-01 | EGA3-2 |
| ENSMMUG00000006144 | POLK      | DNA Polymerase Kappa                                  | 1.54  | 0.67  | 2.26  | 3.96  | -1.46  | 4.59E-02 | 1.63  | 2.14E-02 | 1.23  | 2.50E-01 | EGA3-2 |
| ENSMMUG00000018974 | LYSMD3    | LysM Domain Containing 3                              | 5.26  | 1.49  | 7.41  | 6.82  | -2.39  | 7.47E-03 | 2.87  | 8.65E-04 | -0.36 | 8.83E-01 | EGA3-2 |
| ENSMMUG00000001209 | ARSK      | Arylsulfatase Family Member K                         | 1.63  | 0.14  | 0.41  | 0.33  | -4.25  | 2.10E-05 | 2.30  | 3.54E-02 | -0.76 | 7.51E-01 | EGA3-2 |
| ENSMMUG00000040124 | LOC698520 | Glycine Cleavage System H Protein, Mitochondrial      | 5.10  | 1.26  | 55.21 | 95.63 | -3.69  | 3.11E-05 | 6.97  | 5.07E-17 | 1.39  | 3.29E-01 | EGA3-2 |
| ENSMMUG00000001376 | YTHDC2    | YTH Domain Containing 2                               | 12.09 | 3.30  | 5.56  | 5.89  | -2.49  | 3.49E-04 | 1.58  | 3.21E-02 | -0.91 | 4.75E-01 | EGA3-2 |
| ENSMMUG00000008738 | COMMD10   | COMM Domain Containing 10                             | 2.05  | 0.98  | 5.59  | 9.64  | -3.00  | 2.86E-02 | 2.94  | 2.89E-02 | 3.26  | 6.46E-02 | EGA3-2 |
| ENSMMUG00000033828 |           |                                                       | 0.02  | 0.05  | 5.51  | 4.21  | -14.86 | 2.85E-07 | ##### | 5.56E-16 | 3.19  | 5.67E-01 | EGA3-2 |
| ENSMMUG00000007087 | SLC22A5   | Solute Carrier Family 22 Member 5                     | 0.81  | 0.06  | 0.87  | 1.06  | -4.53  | 1.06E-04 | 4.38  | 1.80E-04 | 1.49  | 4.92E-01 | EGA3-2 |
| ENSMMUG00000009396 | HSPA4     | Heat Shock Protein Family A (Hsp70) Member 4          | 36.77 | 12.30 | 37.74 | 36.68 | -1.58  | 1.13E-03 | 1.73  | 2.62E-04 | -0.01 | 9.94E-01 | EGA3-2 |

|                    |          |                                                                                   |        |       |        |        |        |          |       |          |       |          |        |
|--------------------|----------|-----------------------------------------------------------------------------------|--------|-------|--------|--------|--------|----------|-------|----------|-------|----------|--------|
| ENSMMUG00000019817 | GRK6     | G Protein-coupled Receptor Kinase 6                                               | 2.05   | 0.50  | 1.87   | 2.16   | -5.45  | 1.04E-03 | 3.71  | 3.17E-02 | 1.95  | 5.18E-01 | EGA3-2 |
| ENSMMUG00000011031 | PSMG4    | Proteasome Assembly Chaperone 4                                                   | 1.97   | 0.21  | 1.77   | 3.26   | -6.08  | 4.29E-05 | 5.81  | 8.58E-05 | 0.03  | 9.96E-01 | EGA3-2 |
| ENSMMUG00000045668 | ZFP57    | ZFP57 Zinc Finger Protein                                                         | 0.51   | 2.10  | 5.28   | 5.10   | -4.24  | 5.90E-03 | 6.70  | 4.31E-06 | -2.43 | 3.08E-01 | EGA3-2 |
| ENSMMUG00000003858 | RXRβ     | Retinoid X Receptor Beta                                                          | 2.76   | 0.60  | 3.53   | 4.26   | -4.08  | 1.91E-04 | 3.92  | 3.11E-04 | 1.05  | 6.43E-01 | EGA3-2 |
| ENSMMUG00000021734 | LEMD2    | LEM Domain Containing 2                                                           | 0.88   | 0.19  | 1.26   | 1.98   | -3.65  | 4.36E-03 | 4.10  | 9.55E-04 | 1.21  | 6.37E-01 | EGA3-2 |
| ENSMMUG00000005675 | UBR2     | Ubiquitin Protein Ligase E3 Component N-recogin 2                                 | 7.61   | 2.04  | 11.10  | 8.19   | -1.88  | 5.74E-03 | 2.59  | 6.61E-05 | -0.90 | 4.48E-01 | EGA3-2 |
| ENSMMUG00000005340 | FBXO9    | F-box Protein 9                                                                   | 16.12  | 5.36  | 9.61   | 8.05   | -1.40  | 1.37E-02 | 1.23  | 3.09E-02 | -1.02 | 2.29E-01 | EGA3-2 |
| ENSMMUG00000001659 | FBXL4    | F-box And Leucine Rich Repeat Protein 4                                           | 2.66   | 0.68  | 2.47   | 1.86   | -4.20  | 1.74E-04 | 3.21  | 5.20E-03 | 0.56  | 8.51E-01 | EGA3-2 |
| ENSMMUG00000022287 | ASCC3    | Activating Signal Cointegrator 1 Complex Subunit 3                                | 11.56  | 4.00  | 13.00  | 23.03  | -1.51  | 9.79E-03 | 1.65  | 3.84E-03 | 0.61  | 5.83E-01 | EGA3-2 |
| ENSMMUG00000041812 |          |                                                                                   | 1.84   | 0.19  | 6.03   | 1.66   | -3.53  | 7.35E-03 | 3.66  | 5.10E-03 | -0.66 | 8.44E-01 | EGA3-2 |
| ENSMMUG00000017558 | DCBLD1   | Discoidin, CUB And LCCL Domain Containing 1                                       | 9.20   | 2.92  | 6.79   | 4.50   | -2.13  | 2.10E-02 | 1.92  | 3.80E-02 | -1.19 | 4.50E-01 | EGA3-2 |
| ENSMMUG00000000535 | AMD1     | Adenosylmethionine Decarboxylase 1                                                | 76.58  | 22.23 | 57.06  | 37.98  | -1.91  | 3.74E-07 | 1.27  | 1.28E-03 | 0.02  | 9.89E-01 | EGA3-2 |
| ENSMMUG00000018332 | FAM98B   | Family With Sequence Similarity 98 Member B                                       | 7.77   | 1.53  | 6.90   | 10.28  | -3.00  | 1.68E-03 | 3.22  | 5.98E-04 | 1.04  | 5.73E-01 | EGA3-2 |
| ENSMMUG00000009867 | REC114   | REC114 Meiotic Recombination Protein                                              | 6.97   | 3.20  | 8.08   | 12.24  | -2.44  | 9.30E-04 | 2.47  | 7.21E-04 | 1.52  | 1.66E-01 | EGA3-2 |
| ENSMMUG00000008213 | RCN2     | Reticulocalbin 2                                                                  | 3.06   | 0.54  | 9.58   | 17.34  | -2.82  | 6.63E-03 | 5.18  | 9.33E-08 | 0.05  | 9.91E-01 | EGA3-2 |
| ENSMMUG00000011838 | IDH3A    | Isocitrate Dehydrogenase 3 (NAD(+)) Alpha                                         | 9.73   | 3.18  | 13.46  | 31.48  | -2.13  | 1.97E-03 | 2.04  | 2.86E-03 | 1.45  | 1.44E-01 | EGA3-2 |
| ENSMMUG00000010740 | PSMA4    | Proteasome Subunit Alpha 4                                                        | 7.69   | 3.02  | 7.98   | 13.23  | -1.61  | 4.30E-02 | 1.84  | 1.66E-02 | 1.08  | 4.06E-01 | EGA3-2 |
| ENSMMUG00000039812 |          |                                                                                   | 0.11   | 0.00  | 2.22   | 3.20   | -18.85 | 2.08E-07 | ##### | 4.26E-10 | 4.06  | 5.80E-01 | EGA3-2 |
| ENSMMUG00000000040 | EGLN3    | Egl-9 Family Hypoxia Inducible Factor 3                                           | 6.81   | 3.02  | 10.08  | 7.00   | -2.27  | 1.69E-02 | 3.10  | 5.97E-04 | -1.49 | 3.12E-01 | EGA3-2 |
| ENSMMUG00000049154 | BEX3     | Brain Expressed X-linked 3                                                        | 1.79   | 0.36  | 5.97   | 9.13   | -6.42  | 2.92E-05 | 6.33  | 3.33E-05 | 3.60  | 1.05E-01 | EGA3-2 |
| ENSMMUG00000009012 | FAM3A    | Family With Sequence Similarity 3 Member A                                        | 0.67   | 0.15  | 0.47   | 1.80   | -3.75  | 1.26E-02 | 3.47  | 2.34E-02 | -0.29 | 9.55E-01 | EGA3-2 |
| ENSMMUG00000006307 | RMDN1    | Regulator Of Microtubule Dynamics 1                                               | 5.19   | 0.97  | 4.89   | 10.25  | -3.27  | 2.23E-03 | 2.52  | 2.10E-02 | 2.49  | 9.16E-02 | EGA3-2 |
| ENSMMUG00000046292 |          |                                                                                   | 1.09   | 0.79  | 4.87   | 11.43  | -4.45  | 1.27E-02 | 3.83  | 3.19E-02 | 3.28  | 1.90E-01 | EGA3-2 |
| ENSMMUG00000014666 | PYCR3    | Pyrroline-5-carboxylate Reductase 3                                               | 0.12   | 0.05  | 1.05   | 0.96   | -5.26  | 3.48E-02 | 7.80  | 7.84E-04 | 0.93  | 8.93E-01 | EGA3-2 |
| ENSMMUG00000000203 | PUS7L    | Pseudouridylate Synthase 7 Like                                                   | 2.61   | 0.41  | 19.25  | 6.39   | -2.77  | 9.14E-03 | 3.17  | 2.12E-03 | 1.47  | 4.12E-01 | EGA3-2 |
| ENSMMUG00000021655 | HDAC7    | Histone Deacetylase 7                                                             | 0.44   | 0.05  | 7.38   | 2.09   | -3.62  | 1.12E-03 | 7.74  | 4.40E-14 | -0.68 | 7.97E-01 | EGA3-2 |
| ENSMMUG00000006288 |          |                                                                                   | 0.44   | 0.03  | 0.31   | 1.43   | -5.17  | 3.67E-03 | 4.38  | 1.46E-02 | 3.27  | 2.03E-01 | EGA3-2 |
| ENSMMUG00000046478 | WASHC3   | WASH Complex Subunit 3                                                            | 2.44   | 0.54  | 2.44   | 4.15   | -2.42  | 7.33E-03 | 2.47  | 5.59E-03 | -0.09 | 9.77E-01 | EGA3-2 |
| ENSMMUG00000023469 | HSP90B1  | Heat Shock Protein 90 Beta Family Member 1                                        | 202.19 | 94.36 | 449.81 | 752.10 | -1.47  | 3.71E-02 | 2.58  | 6.41E-05 | 0.80  | 5.15E-01 | EGA3-2 |
| ENSMMUG00000017133 |          |                                                                                   | 50.17  | 22.36 | 79.53  | 39.68  | -2.21  | 9.33E-03 | 2.19  | 8.99E-03 | 0.53  | 7.90E-01 | EGA3-2 |
| ENSMMUG00000031493 | RILPL2   | Rab Interacting Lysosomal Protein Like 2                                          | 2.62   | 0.23  | 1.54   | 0.53   | -9.05  | 9.08E-06 | 5.37  | 1.52E-02 | 2.74  | 5.02E-01 | EGA3-2 |
| ENSMMUG00000010696 | KLF6     | Kruppel Like Factor 6                                                             | 4.11   | 1.20  | 8.25   | 19.04  | -2.95  | 6.91E-03 | 4.24  | 4.19E-05 | 1.12  | 5.94E-01 | EGA3-2 |
| ENSMMUG00000019780 | ANXA11   | Annexin A11                                                                       | 20.08  | 5.61  | 47.52  | 69.66  | -2.14  | 7.03E-04 | 2.41  | 1.00E-04 | 0.92  | 4.00E-01 | EGA3-2 |
| ENSMMUG00000015708 | ANXA7    | Annexin A7                                                                        | 9.26   | 3.00  | 8.46   | 11.37  | -1.96  | 4.63E-04 | 1.85  | 9.59E-04 | 0.85  | 3.76E-01 | EGA3-2 |
| ENSMMUG00000014715 | FRA10AC1 | Fragile Site, Folic Acid Type, Rare, Fra(10)(q23.3) Or Fra(10)(q24.2) Candidate 1 | 9.13   | 1.30  | 2.10   | 1.70   | -4.41  | 7.73E-07 | 2.74  | 3.74E-03 | -0.89 | 6.48E-01 | EGA3-2 |

|                    |           |                                                             |       |       |       |       |        |          |       |          |       |          |        |
|--------------------|-----------|-------------------------------------------------------------|-------|-------|-------|-------|--------|----------|-------|----------|-------|----------|--------|
| ENSMMUG00000006751 | DPCD      | Deleted In Primary Ciliary Dyskinesia Homolog (mouse)       | 17.05 | 3.60  | 11.21 | 6.89  | -2.53  | 2.06E-02 | 2.24  | 4.18E-02 | -1.92 | 2.36E-01 | EGA3-2 |
| ENSMMUG00000007660 | BORCS7    | BLOC-1 Related Complex Subunit 7                            | 1.67  | 0.41  | 4.65  | 2.36  | -3.11  | 6.27E-03 | 4.52  | 2.68E-05 | -0.27 | 9.46E-01 | EGA3-2 |
| ENSMMUG00000008291 | SFXN4     | Sideroflexin 4                                              | 2.18  | 0.64  | 9.63  | 10.16 | -2.70  | 3.38E-02 | 4.75  | 4.72E-05 | -0.99 | 7.09E-01 | EGA3-2 |
| ENSMMUG00000008294 | PRDX3     | Peroxiredoxin 3                                             | 13.62 | 5.33  | 18.08 | 26.31 | -1.54  | 3.80E-02 | 1.90  | 7.22E-03 | 0.68  | 6.37E-01 | EGA3-2 |
| ENSMMUG00000022443 | PPP2R2D   | Protein Phosphatase 2 Regulatory Subunit Bdelta             | 9.48  | 2.44  | 10.15 | 7.33  | -2.71  | 2.93E-07 | 2.53  | 2.22E-06 | -0.33 | 8.13E-01 | EGA3-2 |
| ENSMMUG00000021659 | HRAS      | HRas Proto-oncogene, GTPase                                 | 0.76  | 0.27  | 1.65  | 2.38  | -2.88  | 1.75E-02 | 3.65  | 1.63E-03 | 0.59  | 8.45E-01 | EGA3-2 |
| ENSMMUG00000010784 | TPCN2     | Two Pore Segment Channel 2                                  | 0.76  | 0.12  | 0.65  | 3.08  | -5.04  | 1.75E-05 | 4.24  | 3.76E-04 | 2.29  | 2.04E-01 | EGA3-2 |
| ENSMMUG00000031214 | RHOD      | Ras Homolog Family Member D                                 | 1.41  | 0.26  | 1.96  | 1.49  | -3.60  | 7.22E-03 | 5.01  | 6.86E-05 | 0.06  | 9.89E-01 | EGA3-2 |
| ENSMMUG00000012320 | SNX15     | Sorting Nexin 15                                            | 5.55  | 0.93  | 2.48  | 2.06  | -3.81  | 3.44E-04 | 2.47  | 2.80E-02 | -1.57 | 3.97E-01 | EGA3-2 |
| ENSMMUG00000031120 |           |                                                             | 1.05  | 0.05  | 7.96  | 14.98 | -4.58  | 2.40E-05 | 7.38  | 1.24E-12 | 0.85  | 6.79E-01 | EGA3-2 |
| ENSMMUG00000043402 |           |                                                             | 1.73  | 0.10  | 1.73  | 10.85 | -4.28  | 5.19E-05 | 3.48  | 1.41E-03 | 2.68  | 6.58E-02 | EGA3-2 |
| ENSMMUG00000000316 | LOC699465 | Gamma-butyrobetaine Dioxygenase                             | 0.21  | 0.05  | 3.71  | 0.91  | -5.08  | 1.09E-03 | 7.86  | 7.25E-08 | 2.76  | 2.51E-01 | EGA3-2 |
| ENSMMUG00000040016 |           |                                                             | 7.72  | 0.45  | 1.32  | 3.00  | -5.55  | 1.06E-06 | 2.63  | 4.25E-02 | -1.27 | 5.89E-01 | EGA3-2 |
| ENSMMUG00000016444 | COPB1     | Coatomer Protein Complex Subunit Beta 1                     | 9.13  | 5.26  | 20.75 | 25.14 | -1.26  | 2.79E-02 | 2.44  | 2.98E-06 | 0.03  | 9.87E-01 | EGA3-2 |
| ENSMMUG00000046692 |           |                                                             | 6.07  | 2.93  | 12.72 | 28.57 | -1.12  | 3.37E-02 | 2.41  | 4.04E-07 | 0.84  | 2.86E-01 | EGA3-2 |
| ENSMMUG00000022682 | TRIM68    | Tripartite Motif Containing 68                              | 1.66  | 0.18  | 1.04  | 0.48  | -5.96  | 2.97E-04 | 3.54  | 4.41E-02 | -0.09 | 9.89E-01 | EGA3-2 |
| ENSMMUG00000021282 | LAMTOR1   | Late Endosomal/Lysosomal Adaptor, MAPK And MTOR Activator 1 | 4.73  | 2.10  | 8.82  | 10.15 | -2.60  | 2.30E-02 | 2.85  | 9.91E-03 | 1.28  | 5.30E-01 | EGA3-2 |
| ENSMMUG00000013094 | LIPT2     | Lipoyl(octanoyl) Transferase 2                              | 4.14  | 0.10  | 2.44  | 2.27  | -6.05  | 3.93E-05 | 4.26  | 5.22E-03 | 0.81  | 8.27E-01 | EGA3-2 |
| ENSMMUG00000007008 | DCUN1D5   | Defective In Cullin Neddylation 1 Domain Containing 5       | 18.12 | 6.86  | 19.92 | 12.04 | -1.48  | 2.29E-02 | 1.29  | 4.87E-02 | -0.29 | 8.62E-01 | EGA3-2 |
| ENSMMUG00000014883 |           |                                                             | 9.49  | 1.28  | 9.55  | 9.43  | -3.47  | 5.26E-03 | 3.16  | 1.12E-02 | -0.47 | 8.93E-01 | EGA3-2 |
| ENSMMUG00000008476 | SIAE      | Sialic Acid Acetyltransferase                               | 0.28  | 0.02  | 0.54  | 2.14  | -3.46  | 2.90E-02 | 3.71  | 1.52E-02 | 3.21  | 1.16E-01 | EGA3-2 |
| ENSMMUG00000007103 | THYN1     | Thymocyte Nuclear Protein 1                                 | 4.20  | 0.95  | 2.89  | 2.46  | -3.27  | 4.00E-04 | 2.14  | 2.80E-02 | -1.66 | 2.56E-01 | EGA3-2 |
| ENSMMUG00000013925 |           |                                                             | 1.57  | 0.38  | 3.78  | 4.46  | -2.44  | 2.36E-02 | 3.43  | 7.72E-04 | 0.38  | 8.98E-01 | EGA3-2 |
| ENSMMUG00000002370 | ITGA6     | Integrin Subunit Alpha 6                                    | 42.00 | 11.15 | 36.99 | 59.35 | -1.79  | 2.90E-03 | 1.43  | 1.92E-02 | 1.20  | 1.75E-01 | EGA3-2 |
| ENSMMUG00000001861 | NFE2L2    | Nuclear Factor, Erythroid 2 Like 2                          | 2.76  | 1.32  | 5.70  | 10.45 | -1.87  | 1.24E-02 | 3.10  | 8.59E-06 | 0.86  | 5.20E-01 | EGA3-2 |
| ENSMMUG00000023168 | MAIP1     | Matrix AAA Peptidase Interacting Protein 1                  | 6.68  | 0.84  | 5.41  | 6.37  | -3.89  | 2.64E-05 | 3.55  | 1.48E-04 | -0.26 | 9.34E-01 | EGA3-2 |
| ENSMMUG00000005393 | ACSL3     | Acyl-CoA Synthetase Long Chain Family Member 3              | 46.63 | 16.05 | 44.71 | 59.85 | -1.35  | 2.06E-02 | 1.38  | 1.55E-02 | 0.42  | 7.44E-01 | EGA3-2 |
| ENSMMUG00000011516 | ARL4C     | ADP Ribosylation Factor Like GTPase 4C                      | 1.73  | 0.33  | 5.62  | 21.70 | -4.41  | 4.73E-04 | 4.84  | 1.23E-04 | -0.39 | 9.15E-01 | EGA3-2 |
| ENSMMUG00000005042 | RABL6     | RAB, Member RAS Oncogene Family Like 6                      | 3.78  | 0.93  | 3.03  | 8.13  | -2.75  | 3.77E-03 | 2.19  | 2.35E-02 | 1.39  | 3.83E-01 | EGA3-2 |
| ENSMMUG00000041459 |           |                                                             | 1.10  | 0.00  | 0.34  | 0.08  | -31.52 | 3.55E-19 | ##### | 1.48E-09 | 3.60  | 6.61E-01 | EGA3-2 |
| ENSMMUG00000017214 | VAV2      | Vav Guanine Nucleotide Exchange Factor 2                    | 0.72  | 0.30  | 2.04  | 2.65  | -2.63  | 4.90E-02 | 3.10  | 1.48E-02 | 1.13  | 6.64E-01 | EGA3-2 |
| ENSMMUG00000009327 | SPTAN1    | Spectrin Alpha, Non-erythrocytic 1                          | 13.13 | 2.77  | 8.88  | 12.44 | -2.60  | 1.18E-05 | 2.31  | 1.23E-04 | -0.46 | 7.46E-01 | EGA3-2 |
| ENSMMUG00000044073 | NDUFA8    | NADH:ubiquinone Oxidoreductase Subunit A8                   | 3.29  | 1.33  | 6.72  | 8.48  | -1.68  | 2.34E-02 | 2.47  | 3.69E-04 | -0.18 | 9.40E-01 | EGA3-2 |
| ENSMMUG00000015024 | SLC44A1   | Solute Carrier Family 44 Member 1                           | 0.88  | 0.27  | 7.35  | 19.19 | -2.60  | 1.75E-02 | 6.04  | 1.24E-09 | 0.35  | 9.10E-01 | EGA3-2 |



|                    |           |                                                                            |       |       |       |       |       |          |      |          |       |          |        |
|--------------------|-----------|----------------------------------------------------------------------------|-------|-------|-------|-------|-------|----------|------|----------|-------|----------|--------|
| ENSMMUG00000045930 | GRHPR     | Glyoxylate And Hydroxypyruvate Reductase                                   | 2.47  | 0.70  | 2.35  | 3.06  | -3.10 | 3.77E-02 | 3.32 | 2.25E-02 | -1.18 | 6.99E-01 | EGA3-2 |
| ENSMMUG00000016323 | ARHGEF39  | Rho Guanine Nucleotide Exchange Factor 39                                  | 2.99  | 0.79  | 5.43  | 5.62  | -2.32 | 4.81E-02 | 2.86 | 1.05E-02 | 0.76  | 7.71E-01 | EGA3-2 |
| ENSMMUG00000012472 | PIP5K1B   | Phosphatidylinositol-4-phosphate 5-kinase Type 1 Beta                      | 9.82  | 3.79  | 11.71 | 11.08 | -2.93 | 5.80E-03 | 2.57 | 1.56E-02 | -1.52 | 3.95E-01 | EGA3-2 |
| ENSMMUG00000013003 | LOC706167 | Centrosomal Protein Of 78 KDa                                              | 2.23  | 0.75  | 3.08  | 2.21  | -2.03 | 1.22E-02 | 2.37 | 2.41E-03 | -0.34 | 8.74E-01 | EGA3-2 |
| ENSMMUG00000017053 | DAPK1     | Death Associated Protein Kinase 1                                          | 3.12  | 0.24  | 2.19  | 9.08  | -3.50 | 2.22E-03 | 2.95 | 1.12E-02 | 2.85  | 6.15E-02 | EGA3-2 |
| ENSMMUG00000020440 | HPCAL1    | Hippocalcin Like 1                                                         | 1.53  | 0.60  | 5.89  | 8.47  | -2.64 | 2.55E-02 | 5.20 | 1.32E-06 | 0.14  | 9.74E-01 | EGA3-2 |
| ENSMMUG00000012058 | GEN1      | GEN1, Holliday Junction 5' Flap Endonuclease                               | 4.47  | 1.87  | 6.40  | 9.99  | -1.86 | 6.31E-03 | 2.18 | 9.65E-04 | 1.32  | 1.85E-01 | EGA3-2 |
| ENSMMUG00000014083 | NT5C1B    | 5'-nucleotidase, Cytosolic IB                                              | 1.70  | 0.56  | 1.72  | 1.27  | -2.41 | 2.61E-02 | 2.35 | 2.79E-02 | -0.16 | 9.68E-01 | EGA3-2 |
| ENSMMUG00000001570 |           |                                                                            | 2.21  | 0.10  | 2.05  | 4.04  | -4.70 | 6.50E-03 | 4.58 | 8.93E-03 | 1.27  | 7.40E-01 | EGA3-2 |
| ENSMMUG00000014458 | RBKS      | Ribokinase                                                                 | 8.34  | 0.20  | 2.10  | 3.83  | -5.67 | 2.80E-06 | 2.79 | 3.57E-02 | 0.50  | 8.88E-01 | EGA3-2 |
| ENSMMUG00000010640 | ERLEC1    | Endoplasmic Reticulum Lectin 1                                             | 11.56 | 4.08  | 14.61 | 16.67 | -2.19 | 2.90E-04 | 2.68 | 5.88E-06 | -0.16 | 9.37E-01 | EGA3-2 |
| ENSMMUG00000013541 | SPTBN1    | Spectrin Beta, Non-erythrocytic 1                                          | 24.05 | 11.07 | 59.28 | 72.56 | -1.47 | 4.42E-03 | 2.83 | 4.58E-09 | -0.25 | 8.53E-01 | EGA3-2 |
| ENSMMUG00000048757 | FAM136A   | Family With Sequence Similarity 136 Member A                               | 14.30 | 4.37  | 13.74 | 5.34  | -2.01 | 2.26E-03 | 1.40 | 4.10E-02 | -0.07 | 9.77E-01 | EGA3-2 |
| ENSMMUG00000009485 | SPR       | Sepiapterin Reductase                                                      | 14.57 | 5.04  | 9.14  | 9.74  | -2.07 | 1.17E-02 | 1.85 | 2.48E-02 | -0.94 | 5.26E-01 | EGA3-2 |
| ENSMMUG00000016730 |           |                                                                            | 1.79  | 0.12  | 1.61  | 0.93  | -5.82 | 1.20E-03 | 4.21 | 2.38E-02 | -0.81 | 8.65E-01 | EGA3-2 |
| ENSMMUG00000021746 | RNASEH2B  | Ribonuclease H2 Subunit B                                                  | 2.65  | 1.51  | 6.44  | 8.30  | -2.51 | 2.74E-02 | 2.33 | 3.88E-02 | 2.26  | 1.52E-01 | EGA3-2 |
| ENSMMUG00000021459 | MYCBP2    | MYC Binding Protein 2, E3 Ubiquitin Protein Ligase                         | 8.50  | 2.54  | 33.65 | 32.91 | -1.62 | 1.96E-03 | 3.68 | 2.85E-14 | 0.15  | 9.30E-01 | EGA3-2 |
| ENSMMUG00000005841 | DNAJC3    | DnaJ Heat Shock Protein Family (Hsp40) Member C3                           | 1.41  | 0.52  | 1.02  | 0.95  | -3.00 | 1.64E-03 | 2.01 | 4.56E-02 | 0.28  | 9.29E-01 | EGA3-2 |
| ENSMMUG00000020711 | SLC2A4RG  | SLC2A4 Regulator                                                           | 2.73  | 0.38  | 0.46  | 2.11  | -7.08 | 7.41E-09 | 3.68 | 5.40E-03 | 2.24  | 2.65E-01 | EGA3-2 |
| ENSMMUG00000022589 | PMEPA1    | Prostate Transmembrane Protein, Androgen Induced 1                         | 0.36  | 0.07  | 0.48  | 1.86  | -4.91 | 3.54E-03 | 3.52 | 4.22E-02 | 3.91  | 8.30E-02 | EGA3-2 |
| ENSMMUG00000016555 | NCOA5     | Nuclear Receptor Coactivator 5                                             | 8.52  | 2.26  | 9.71  | 7.67  | -1.88 | 1.14E-02 | 2.19 | 2.36E-03 | -0.33 | 8.63E-01 | EGA3-2 |
| ENSMMUG00000031253 | DYNLRB1   | Dynein Light Chain Roadblock-type1                                         | 35.57 | 11.37 | 47.59 | 44.06 | -2.34 | 1.80E-02 | 2.48 | 1.01E-02 | -0.73 | 7.33E-01 | EGA3-2 |
| ENSMMUG00000020799 | BID       | BH3 Interacting Domain Death Agonist                                       | 2.66  | 0.36  | 5.49  | 2.38  | -3.95 | 2.96E-03 | 6.14 | 9.85E-07 | -2.61 | 1.82E-01 | EGA3-2 |
| ENSMMUG00000020999 | GGT1      | Gamma-glutamyltransferase 1                                                | 0.61  | 0.07  | 0.49  | 0.61  | -5.08 | 2.23E-03 | 4.18 | 1.23E-02 | -0.52 | 9.14E-01 | EGA3-2 |
| ENSMMUG00000010839 | SGSM1     | Small G Protein Signaling Modulator 1                                      | 1.02  | 0.13  | 0.79  | 0.76  | -4.27 | 5.73E-05 | 2.73 | 1.53E-02 | -0.76 | 7.64E-01 | EGA3-2 |
| ENSMMUG00000009945 | YWHAH     | Tyrosine 3-monooxygenase/tryptophan 5-monooxygenase Activation Protein Eta | 40.16 | 14.77 | 39.41 | 49.31 | -1.49 | 2.19E-02 | 1.67 | 8.14E-03 | -0.34 | 8.33E-01 | EGA3-2 |
| ENSMMUG00000005221 | TEF       | TEF, PAR BZIP Transcription Factor                                         | 0.22  | 0.09  | 3.83  | 0.29  | -4.94 | 3.84E-02 | 8.95 | 3.91E-05 | -3.85 | 2.92E-01 | EGA3-2 |
| ENSMMUG00000020524 | PAFAH1B1  | Platelet Activating Factor Acetylhydrolase 1b Regulatory Subunit 1         | 16.34 | 8.78  | 26.18 | 21.01 | -0.90 | 2.28E-02 | 1.44 | 8.81E-05 | -0.32 | 6.94E-01 | EGA3-2 |
| ENSMMUG00000023390 | TAX1BP3   | Tax1 Binding Protein 3                                                     | 4.26  | 0.60  | 6.73  | 29.44 | -4.07 | 1.77E-03 | 4.27 | 8.79E-04 | 1.06  | 7.10E-01 | EGA3-2 |
| ENSMMUG00000021409 | DRG2      | Developmentally Regulated GTP Binding Protein 2                            | 2.57  | 2.66  | 10.13 | 11.58 | -2.33 | 6.55E-03 | 3.98 | 6.06E-07 | 1.15  | 4.29E-01 | EGA3-2 |
| ENSMMUG00000001026 | BLMH      | Bleomycin Hydrolase                                                        | 8.79  | 2.06  | 7.41  | 9.10  | -3.06 | 4.72E-05 | 2.23 | 4.22E-03 | 0.84  | 5.74E-01 | EGA3-2 |
| ENSMMUG00000018222 | RHOT1     | Ras Homolog Family Member T1                                               | 6.36  | 2.62  | 10.13 | 5.69  | -1.51 | 6.09E-03 | 2.14 | 4.23E-05 | -0.86 | 3.26E-01 | EGA3-2 |

|                     |              |                                                                                                   |        |       |        |        |        |          |       |          |       |          |        |
|---------------------|--------------|---------------------------------------------------------------------------------------------------|--------|-------|--------|--------|--------|----------|-------|----------|-------|----------|--------|
| ENSMMUG00000018752  | SPOP         | Speckle Type BTB/POZ Protein                                                                      | 15.86  | 2.29  | 8.20   | 2.90   | -2.83  | 7.13E-05 | 2.39  | 1.03E-03 | -1.70 | 9.97E-02 | EGA3-2 |
| ENSMMUG0000004005   | SMARCE1      | SWI/SNF Related, Matrix Associated, Actin Dependent Regulator Of Chromatin, Subfamily E, Member 1 | 21.73  | 13.17 | 19.98  | 21.51  | -1.02  | 4.02E-02 | 1.02  | 3.75E-02 | 0.08  | 9.64E-01 | EGA3-2 |
| ENSMMUG00000009376  |              |                                                                                                   | 0.35   | 0.04  | 1.31   | 0.93   | -3.32  | 3.93E-02 | 4.25  | 5.05E-03 | 1.83  | 4.95E-01 | EGA3-2 |
| ENSMMUG00000016797  | TUBG1        | Tubulin Gamma 1                                                                                   | 1.65   | 1.36  | 2.50   | 2.14   | -2.50  | 9.88E-03 | 2.42  | 1.14E-02 | 0.81  | 6.88E-01 | EGA3-2 |
| ENSMMUG00000020975  | KIF19        | Kinesin Family Member 19                                                                          | 1.06   | 0.02  | 0.68   | 0.09   | -5.47  | 9.44E-05 | 4.96  | 5.74E-04 | -1.68 | 5.29E-01 | EGA3-2 |
| ENSMMUG00000003381  | CDK3         | Cyclin Dependent Kinase 3                                                                         | 1.65   | 0.08  | 0.89   | 1.25   | -5.41  | 1.87E-06 | 3.83  | 1.19E-03 | 0.54  | 8.62E-01 | EGA3-2 |
| ENSMMUG00000000258  | MCRIP1       | MAPK Regulated Corepressor Interacting Protein 1                                                  | 4.68   | 0.07  | 1.57   | 1.79   | -8.02  | 6.13E-08 | 5.01  | 1.41E-03 | -0.60 | 8.91E-01 | EGA3-2 |
| ENSMMUG00000013088  |              |                                                                                                   | 3.09   | 1.22  | 34.41  | 53.78  | -2.76  | 5.66E-03 | 6.13  | 1.57E-11 | 1.53  | 3.21E-01 | EGA3-2 |
| ENSMMUG00000041581  | CMIP         | C-Maf Inducing Protein                                                                            | 9.82   | 2.72  | 5.65   | 12.68  | -3.36  | 2.49E-05 | 2.06  | 1.43E-02 | -0.22 | 9.34E-01 | EGA3-2 |
| ENSMMUG00000014326  |              |                                                                                                   | 0.53   | 0.39  | 1.08   | 3.20   | -3.78  | 3.67E-02 | 3.98  | 2.50E-02 | 3.53  | 1.44E-01 | EGA3-2 |
| ENSMMUG00000020328  | ANKRD29      | Ankyrin Repeat Domain 29                                                                          | 0.31   | 0.10  | 0.80   | 1.10   | -3.30  | 2.96E-02 | 4.07  | 4.55E-03 | 0.88  | 8.02E-01 | EGA3-2 |
| ENSMMUG00000014915  | ZADH2        | Zinc Binding Alcohol Dehydrogenase Domain Containing 2                                            | 0.27   | 0.04  | 0.46   | 1.12   | -3.96  | 7.59E-03 | 3.16  | 3.80E-02 | -0.03 | 9.97E-01 | EGA3-2 |
| ENSMMUG00000021183  | ISYNA1       | Inositol-3-phosphate Synthase 1                                                                   | 0.78   | 0.60  | 1.74   | 6.31   | -2.63  | 3.51E-02 | 2.45  | 4.90E-02 | 2.14  | 2.39E-01 | EGA3-2 |
| ENSMMUG00000011291  | USF2         | Upstream Transcription Factor 2, C-fos Interacting                                                | 7.52   | 3.36  | 8.17   | 8.72   | -2.18  | 6.72E-03 | 1.63  | 4.83E-02 | 1.11  | 4.21E-01 | EGA3-2 |
| ENSMMUG00000028763  |              |                                                                                                   | 2.22   | 0.93  | 21.71  | 38.77  | -3.25  | 2.00E-03 | 6.45  | 2.83E-11 | 1.68  | 2.80E-01 | EGA3-2 |
| ENSMMUG00000020797  | SHKBP1       | SH3KBP1 Binding Protein 1                                                                         | 1.55   | 0.59  | 3.33   | 2.59   | -2.48  | 1.06E-02 | 3.21  | 5.58E-04 | -0.22 | 9.47E-01 | EGA3-2 |
| ENSMMUG00000014591  | LIG1         | DNA Ligase 1                                                                                      | 12.05  | 4.27  | 7.58   | 11.81  | -3.13  | 7.54E-04 | 2.26  | 1.89E-02 | -0.79 | 6.96E-01 | EGA3-2 |
| ENSMMUG00000023531  | ETFB         | Electron Transfer Flavoprotein Beta Subunit                                                       | 0.76   | 0.16  | 2.56   | 2.78   | -4.67  | 5.62E-06 | 6.11  | 1.90E-09 | -2.32 | 1.26E-01 | EGA3-2 |
| ENSMMUG00000003115  | NLRP2        | NLR Family Pyrin Domain Containing 2                                                              | 133.39 | 60.03 | 235.45 | 475.48 | -1.30  | 1.65E-02 | 1.97  | 1.03E-04 | 0.66  | 4.88E-01 | EGA3-2 |
| ENSMMUG00000044934  |              |                                                                                                   | 5.59   | 0.29  | 5.50   | 11.41  | -6.44  | 1.28E-06 | 3.90  | 6.22E-03 | 0.85  | 7.97E-01 | EGA3-2 |
| ENSMMUG00000047049  |              |                                                                                                   | 24.96  | 3.56  | 5.85   | 4.55   | -4.52  | 1.52E-06 | 2.74  | 6.03E-03 | -0.86 | 6.87E-01 | EGA3-2 |
| ENSMMUG00000039011  | LOC106995492 | Cell Growth Regulator With RING Finger Domain Protein 1-like                                      | 1.79   | 0.18  | 1.96   | 1.78   | -3.48  | 3.02E-02 | 3.89  | 1.15E-02 | 1.39  | 6.55E-01 | EGA3-2 |
| ENSMMUG000000039683 |              |                                                                                                   | 2.62   | 0.00  | 0.03   | 0.36   | -24.63 | 1.18E-04 | ##### | 1.21E-02 | 4.39  | 7.82E-01 | EGA3-2 |
| ENSMMUG00000032219  | LOC704623    | Interferon-induced Transmembrane Protein 3                                                        | 1.93   | 1.86  | 24.31  | 91.27  | -1.79  | 1.89E-01 | 4.58  | 7.49E-05 | 3.49  | 1.97E-02 | EGA3-3 |
| ENSMMUG00000000694  | PHLDB2       | Pleckstrin Homology Like Domain Family B Member 2                                                 | 0.01   | 0.10  | 1.75   | 7.76   | 2.11   | 1.28E-01 | 3.07  | 9.42E-03 | 5.37  | 3.82E-05 | EGA3-3 |
| ENSMMUG00000016072  | C2H3orf52    | Chromosome 2 Open Reading Frame, Human C3orf52                                                    | 0.23   | 1.16  | 9.96   | 21.22  | 1.07   | 3.97E-01 | 3.66  | 3.06E-04 | 2.84  | 3.58E-02 | EGA3-3 |
| ENSMMUG00000010495  | MAPKAPK3     | Mitogen-activated Protein Kinase-activated Protein Kinase 3                                       | 0.17   | 0.11  | 3.10   | 4.60   | -1.07  | 5.18E-01 | 3.82  | 3.36E-03 | 3.45  | 4.01E-02 | EGA3-3 |
| ENSMMUG00000023099  | LRPAP1       | LDL Receptor Related Protein Associated Protein 1                                                 | 4.43   | 3.71  | 17.40  | 131.60 | -0.33  | 7.87E-01 | 1.80  | 3.89E-02 | 3.18  | 9.88E-04 | EGA3-3 |
| ENSMMUG00000021887  | S100P        | S100 Calcium Binding Protein P                                                                    | 0.10   | 0.55  | 36.59  | 298.21 | 1.09   | 4.85E-01 | 5.52  | 4.37E-07 | 3.73  | 6.17E-03 | EGA3-3 |
| ENSMMUG00000038129  |              |                                                                                                   | 0.19   | 0.33  | 8.33   | 82.26  | -0.16  | 9.47E-01 | 3.07  | 2.81E-02 | 5.60  | 6.91E-05 | EGA3-3 |
| ENSMMUG00000014557  |              |                                                                                                   | 0.74   | 3.07  | 4.87   | 8.78   | -1.53  | 3.46E-01 | 2.99  | 3.13E-02 | 3.69  | 3.25E-02 | EGA3-3 |
| ENSMMUG00000020442  | ATCB8        | ATP Binding Cassette Subfamily B Member 8                                                         | 0.09   | 0.03  | 0.32   | 1.07   | -1.51  | 3.56E-01 | 3.08  | 2.57E-02 | 3.92  | 1.81E-02 | EGA3-3 |

|                     |              |                                                       |      |      |       |        |       |          |      |          |       |          |        |
|---------------------|--------------|-------------------------------------------------------|------|------|-------|--------|-------|----------|------|----------|-------|----------|--------|
| ENSMMUG00000010615  | GALNT10      | Polypeptide N-acetylgalactosaminyltransferase 10      | 0.33 | 0.83 | 2.48  | 3.24   | -1.45 | 2.71E-01 | 2.82 | 1.39E-02 | 3.72  | 6.29E-03 | EGA3-3 |
| ENSMMUG00000017607  | N4BP3        | NEDD4 Binding Protein 3                               | 0.00 | 0.00 | 0.31  | 2.29   | -0.16 | 9.51E-01 | 5.16 | 4.64E-04 | 5.82  | 4.78E-04 | EGA3-3 |
| ENSMMUG00000019438  | UTRN         | Utrophin                                              | 1.29 | 0.70 | 4.11  | 17.53  | -0.74 | 4.62E-01 | 1.95 | 2.05E-02 | 3.89  | 1.43E-05 | EGA3-3 |
| ENSMMUG00000014983  | ANPEP        | Alanyl Aminopeptidase, Membrane                       | 0.12 | 0.36 | 7.70  | 81.56  | -0.94 | 5.78E-01 | 3.43 | 9.62E-03 | 6.85  | 7.19E-07 | EGA3-3 |
| ENSMMUG00000011345  | PRPS2        | Phosphoribosyl Pyrophosphate Synthetase 2             | 0.11 | 0.10 | 0.89  | 3.24   | 1.24  | 3.20E-01 | 2.35 | 2.97E-02 | 2.84  | 3.74E-02 | EGA3-3 |
| ENSMMUG00000001618  | ATP6V0D2     | ATPase H+ Transporting V0 Subunit D2                  | 0.17 | 0.33 | 5.32  | 34.21  | 1.03  | 3.31E-01 | 1.95 | 3.58E-02 | 4.02  | 4.29E-05 | EGA3-3 |
| ENSMMUG00000017631  | GPRC5A       | G Protein-coupled Receptor Class C Group 5 Member A   | 0.76 | 0.13 | 2.39  | 40.45  | -1.13 | 3.24E-01 | 2.35 | 1.72E-02 | 5.89  | 1.79E-09 | EGA3-3 |
| ENSMMUG00000012223  | BCAT1        | Branched Chain Amino Acid Transaminase 1              | 0.99 | 1.74 | 11.50 | 32.32  | -0.41 | 8.22E-01 | 2.68 | 4.07E-02 | 3.48  | 3.12E-02 | EGA3-3 |
| ENSMMUG00000002163  | KRT8         | Keratin 8                                             | 0.75 | 2.60 | 64.09 | 477.36 | 1.41  | 1.40E-01 | 4.01 | 8.56E-07 | 2.23  | 4.80E-02 | EGA3-3 |
| ENSMMUG00000031911  | LOC700569    | Keratin, Type I Cytoskeletal 18                       | 0.55 | 3.74 | 80.28 | 648.37 | 1.56  | 1.24E-01 | 4.73 | 3.87E-08 | 2.95  | 7.76E-03 | EGA3-3 |
| ENSMMUG000000038601 |              |                                                       | 0.16 | 0.31 | 13.61 | 97.94  | 1.16  | 6.43E-01 | 4.70 | 6.38E-03 | 4.30  | 4.54E-02 | EGA3-3 |
| ENSMMUG00000015070  | TBX3         | T-box 3                                               | 1.93 | 0.77 | 14.38 | 55.33  | -0.95 | 3.93E-01 | 2.39 | 1.10E-02 | 2.90  | 1.12E-02 | EGA3-3 |
| ENSMMUG000000039892 |              |                                                       | 1.44 | 2.67 | 13.51 | 94.55  | -0.88 | 5.75E-01 | 2.71 | 3.11E-02 | 5.52  | 3.33E-05 | EGA3-3 |
| ENSMMUG00000013256  | LOC697564    | Interferon-induced Transmembrane Protein 3            | 3.70 | 3.06 | 40.29 | 193.35 | -1.37 | 2.24E-01 | 4.09 | 1.57E-05 | 3.53  | 2.19E-03 | EGA3-3 |
| ENSMMUG00000018360  | RCN1         | Reticulocalbin 1                                      | 2.56 | 2.21 | 18.12 | 68.39  | -1.00 | 4.34E-01 | 3.90 | 1.14E-04 | 2.81  | 3.87E-02 | EGA3-3 |
| ENSMMUG00000017781  | NMI          | N-myc And STAT Interactor                             | 0.68 | 1.35 | 11.52 | 41.09  | -1.07 | 5.11E-01 | 5.54 | 4.96E-06 | 4.03  | 8.83E-03 | EGA3-3 |
| ENSMMUG00000017143  | LRP2         | LDL Receptor Related Protein 2                        | 0.07 | 0.14 | 9.41  | 138.38 | 0.40  | 7.88E-01 | 3.94 | 6.47E-05 | 6.46  | 4.48E-10 | EGA3-3 |
| ENSMMUG000000037943 |              |                                                       | 0.35 | 0.84 | 21.36 | 212.70 | -0.14 | 9.51E-01 | 4.82 | 5.62E-05 | 4.50  | 6.40E-04 | EGA3-3 |
| ENSMMUG00000001304  | TGFBR1       | Transforming Growth Factor Beta Receptor 1            | 0.30 | 0.48 | 4.11  | 7.47   | -0.15 | 9.38E-01 | 2.63 | 2.59E-02 | 3.23  | 2.62E-02 | EGA3-3 |
| ENSMMUG00000028608  |              |                                                       | 0.41 | 3.40 | 39.34 | 356.70 | 1.72  | 3.00E-01 | 2.85 | 2.98E-02 | 5.64  | 5.09E-05 | EGA3-3 |
| ENSMMUG000000031017 | LOC100430243 | Interferon-induced Transmembrane Protein 3 Pseudogene | 1.20 | 2.06 | 12.79 | 63.85  | -1.64 | 1.75E-01 | 3.89 | 1.38E-04 | 4.13  | 4.23E-04 | EGA3-3 |
| ENSMMUG000000030326 | LOC717105    | Interferon-induced Transmembrane Protein 3            | 2.69 | 5.01 | 23.97 | 113.86 | -0.66 | 6.54E-01 | 2.97 | 7.29E-03 | 4.24  | 7.76E-04 | EGA3-3 |
| ENSMMUG00000012889  | PCYT2        | Phosphate Cytidylyltransferase 2, Ethanolamine        | 0.21 | 2.05 | 1.88  | 5.05   | -2.08 | 1.17E-01 | 3.94 | 7.12E-04 | 3.52  | 1.69E-02 | EGA3-3 |
| ENSMMUG000000031339 |              |                                                       | 0.23 | 1.55 | 49.92 | 296.84 | 0.13  | 9.53E-01 | 3.79 | 5.92E-03 | 5.18  | 8.55E-04 | EGA3-3 |
| ENSMMUG000000039694 |              |                                                       | 0.15 | 0.39 | 15.35 | 169.97 | -0.07 | 9.76E-01 | 4.35 | 5.73E-04 | 4.97  | 3.43E-04 | EGA3-3 |
| ENSMMUG00000012185  | ATF3         | Activating Transcription Factor 3                     | 0.33 | 0.61 | 4.96  | 0.40   | 0.02  | 9.93E-01 | 4.13 | 8.59E-03 | -4.19 | 3.98E-02 | EGA3-4 |
| ENSMMUG000000039900 |              |                                                       | 0.15 | 0.32 | 3.68  | 0.49   | -0.41 | 8.72E-01 | 4.78 | 3.93E-03 | -5.04 | 1.63E-02 | EGA3-4 |
| ENSMMUG00000015163  | SCAF8        | SR-related CTD Associated Factor 8                    | 5.32 | 8.59 | 13.22 | 8.92   | 0.49  | 3.21E-01 | 1.07 | 1.16E-02 | -1.22 | 2.13E-02 | EGA3-4 |
| ENSMMUG00000008934  | MARCKS       | Myristoylated Alanine Rich Protein Kinase C Substrate | 2.13 | 3.69 | 38.09 | 23.01  | 1.09  | 2.27E-01 | 4.02 | 8.08E-08 | -2.19 | 3.09E-02 | EGA3-4 |
| ENSMMUG000000008297 | HOMER2       | Homer Scaffolding Protein 2                           | 2.67 | 1.51 | 8.69  | 1.86   | -1.10 | 9.18E-02 | 3.09 | 6.00E-08 | -2.60 | 1.11E-04 | EGA3-4 |
| ENSMMUG00000013865  | WARS         | Tryptophanyl-tRNA Synthetase                          | 5.39 | 6.43 | 32.93 | 15.55  | -0.25 | 8.06E-01 | 2.94 | 1.42E-05 | -2.15 | 1.41E-02 | EGA3-4 |
| ENSMMUG000000005143 |              |                                                       | 4.35 | 3.55 | 10.22 | 2.76   | -0.34 | 7.41E-01 | 1.97 | 7.64E-03 | -2.09 | 2.54E-02 | EGA3-4 |
| ENSMMUG000000022185 | OSR2         | Odd-skipped Related Transcription Factor 2            | 0.35 | 1.39 | 3.97  | 0.17   | -0.30 | 9.15E-01 | 4.93 | 5.93E-03 | -7.57 | 2.21E-04 | EGA3-4 |
| ENSMMUG00000015491  | TATDN1       | TatD DNase Domain Containing 1                        | 2.06 | 1.40 | 3.98  | 2.23   | -0.70 | 4.07E-01 | 1.90 | 6.63E-03 | -1.94 | 3.10E-02 | EGA3-4 |
| ENSMMUG00000021759  | TRIB1        | Tribbles Pseudokinase 1                               | 2.02 | 5.06 | 18.68 | 5.40   | 1.14  | 1.42E-01 | 1.96 | 5.25E-03 | -1.94 | 3.12E-02 | EGA3-4 |
| ENSMMUG00000008557  | ZNF618       | Zinc Finger Protein 618                               | 0.78 | 0.31 | 2.16  | 0.64   | -2.94 | 7.50E-02 | 5.45 | 2.98E-04 | -4.50 | 2.74E-02 | EGA3-4 |

|                    |          |                                                                       |       |      |       |        |        |          |       |          |        |          |        |
|--------------------|----------|-----------------------------------------------------------------------|-------|------|-------|--------|--------|----------|-------|----------|--------|----------|--------|
| ENSMMUG00000010834 | REL      | REL Proto-oncogene, NF-kB Subunit                                     | 4.59  | 3.23 | 19.23 | 1.91   | -0.61  | 6.48E-01 | 3.06  | 2.16E-03 | -3.26  | 8.33E-03 | EGA3-4 |
| ENSMMUG00000010279 | SLC1A4   | Solute Carrier Family 1 Member 4                                      | 0.98  | 0.79 | 2.59  | 0.46   | -1.17  | 4.14E-01 | 2.75  | 2.56E-02 | -5.18  | 1.89E-04 | EGA3-4 |
| ENSMMUG00000016258 | PPARA    | Peroxisome Proliferator Activated Receptor Alpha                      | 0.75  | 1.36 | 8.14  | 1.66   | 1.39   | 1.13E-01 | 2.69  | 5.79E-04 | -2.09  | 4.74E-02 | EGA3-4 |
| ENSMMUG00000011278 | CRELD2   | Cysteine Rich With EGF Like Domains 2                                 | 2.41  | 1.86 | 14.49 | 5.87   | -1.60  | 2.00E-01 | 4.76  | 6.55E-06 | -3.14  | 2.54E-02 | EGA3-4 |
| ENSMMUG00000030333 | KCNAB3   | Potassium Voltage-gated Channel Subfamily A Regulatory Beta Subunit 3 | 0.33  | 0.08 | 1.92  | 0.06   | -3.01  | 7.85E-02 | 4.78  | 2.61E-03 | -5.57  | 5.69E-03 | EGA3-4 |
| ENSMMUG00000027066 | MIR519D  | MicroRNA 519d                                                         | 0.00  | 0.00 | 3.66  | 1.08   | 2.84   | 7.62E-01 | ##### | 5.62E-11 | -19.18 | 2.29E-02 | EGA3-4 |
| ENSMMUG00000015084 | LAMC1    | Laminin Subunit Gamma 1                                               | 16.13 | 4.84 | 28.79 | 123.95 | -1.49  | 4.60E-02 | 2.35  | 6.80E-04 | 2.16   | 1.40E-02 | EGA3-5 |
| ENSMMUG00000044194 |          |                                                                       | 0.07  | 0.00 | 3.22  | 5.78   | -14.92 | 1.23E-10 | ##### | 8.32E-21 | 14.28  | 1.34E-08 | EGA3-5 |
| ENSMMUG00000022094 |          |                                                                       | 1.19  | 0.63 | 2.87  | 4.30   | -2.01  | 1.43E-02 | 3.38  | 8.16E-06 | 2.09   | 4.30E-02 | EGA3-5 |
| ENSMMUG00000011719 | SERPINB9 | Serpin Family B Member 9                                              | 0.96  | 0.17 | 4.39  | 55.84  | -4.72  | 1.61E-04 | 5.32  | 1.50E-05 | 5.30   | 1.75E-04 | EGA3-5 |
| ENSMMUG00000002797 | JDP2     | Jun Dimerization Protein 2                                            | 0.88  | 0.33 | 1.52  | 8.45   | -3.79  | 3.75E-02 | 3.72  | 3.71E-02 | 4.50   | 4.10E-02 | EGA3-5 |
| ENSMMUG00000015740 | PIR      | Pirin                                                                 | 0.83  | 0.02 | 0.20  | 0.83   | -7.11  | 2.97E-08 | 3.42  | 1.79E-02 | 4.95   | 2.06E-03 | EGA3-5 |
| ENSMMUG00000012762 | ATP6AP2  | ATPase H+ Transporting Accessory Protein 2                            | 4.38  | 1.02 | 5.70  | 17.47  | -2.18  | 1.72E-02 | 1.85  | 4.50E-02 | 2.85   | 8.33E-03 | EGA3-5 |
| ENSMMUG00000008911 | SLC16A9  | Solute Carrier Family 16 Member 9                                     | 1.04  | 0.23 | 1.36  | 7.56   | -4.07  | 1.90E-03 | 2.94  | 3.48E-02 | 4.21   | 5.76E-03 | EGA3-5 |
| ENSMMUG00000041316 |          |                                                                       | 0.98  | 0.04 | 0.14  | 1.61   | -6.29  | 8.38E-08 | 2.87  | 2.75E-02 | 4.77   | 1.06E-03 | EGA3-5 |
| ENSMMUG00000022608 | ATP12A   | ATPase H+/K+ Transporting Non-gastric Alpha2 Subunit                  | 0.18  | 0.02 | 0.74  | 25.09  | -3.43  | 9.54E-03 | 3.68  | 4.02E-03 | 5.86   | 1.20E-05 | EGA3-5 |
| ENSMMUG00000023551 | PXMP4    | Peroxisomal Membrane Protein 4                                        | 1.18  | 0.03 | 0.79  | 2.27   | -5.10  | 8.78E-05 | 2.87  | 4.33E-02 | 3.84   | 1.83E-02 | EGA3-5 |
| ENSMMUG00000012349 | TST      | Thiosulfate Sulfurtransferase                                         | 0.55  | 0.04 | 0.69  | 4.33   | -3.84  | 1.69E-02 | 4.28  | 5.57E-03 | 4.77   | 1.19E-02 | EGA3-5 |
| ENSMMUG00000019239 | TBC1D19  | TBC1 Domain Family Member 19                                          | 0.78  | 0.57 | 2.42  | 0.12   | -4.33  | 3.43E-02 | 5.98  | 2.27E-03 | -8.04  | 6.26E-04 | EGA3-6 |
| ENSMMUG00000007310 | SLC25A12 | Solute Carrier Family 25 Member 12                                    | 4.05  | 0.91 | 2.95  | 0.78   | -2.93  | 6.69E-03 | 2.96  | 5.67E-03 | -2.97  | 3.11E-02 | EGA3-6 |
| ENSMMUG00000018791 | MOCOS    | Molybdenum Cofactor Sulfurase                                         | 4.13  | 1.33 | 1.48  | 0.28   | -3.00  | 5.38E-03 | 2.41  | 3.12E-02 | -4.01  | 2.22E-03 | EGA3-6 |

- a) FPKM: Fragments Per Kilobase of transcript per Million mapped reads.  
b) L2FC: Log fold change of base 2. Positive values indicate an increase in GVII vs. GV.  
c) FDR: False discovery rate. Adjusted p-value using the Benjamin-Hochberg method.
