# Supplementary material
Source: PubMed Central journal article supplement (PMC6417155)
Supplement: gaz001_schall_et_al._table_s6.pdf [file gaz001_schall_et_al._table_s6.pdf]

Table S6 - EGA4 super-group DEGs

| Ensembl ID           | Symbol       | GeneName                                               | FPKM <sup>a</sup> |       |        |            | MII:8-Cell        |                  | 8-Cell:Morula |          | Morula:Blast |          | Sub-Group |
|----------------------|--------------|--------------------------------------------------------|-------------------|-------|--------|------------|-------------------|------------------|---------------|----------|--------------|----------|-----------|
|                      |              |                                                        | MIl               | 8Cell | Morula | Exp. Blast | L2FC <sup>b</sup> | FDR <sup>c</sup> | L2FC          | FDR      | L2FC         | FDR      |           |
| ENSMMUG00000008350   |              |                                                        | 2.12              | 3.80  | 0.87   | 8.04       | -1.85             | 3.97E-01         | -2.04         | 3.46E-01 | 7.62         | 1.95E-04 | EGA4-1    |
| ENSMMUG000000015174  | DFFB         | DNA Fragmentation Factor Subunit Beta                  | 0.28              | 0.25  | 3.85   | 1.08       | 0.08              | 9.71E-01         | 0.09          | 9.69E-01 | 4.63         | 1.11E-02 | EGA4-1    |
| ENSMMUG000000023382  | EPHB2        | EPH Receptor B2                                        | 0.04              | 0.06  | 0.21   | 1.07       | -0.16             | 9.55E-01         | 2.18          | 2.54E-01 | 4.71         | 2.09E-02 | EGA4-1    |
| ENSMMUG000000019549  |              |                                                        | 0.45              | 0.58  | 0.75   | 3.84       | -1.50             | 4.02E-01         | 0.64          | 7.58E-01 | 5.96         | 4.07E-04 | EGA4-1    |
| ENSMMUG000000004216  | FUCA1        | Alpha-L-fucosidase 1                                   | 12.92             | 16.11 | 21.21  | 54.48      | -0.04             | 9.72E-01         | 0.35          | 6.92E-01 | 1.98         | 1.74E-02 | EGA4-1    |
| ENSMMUG000000012328  | SLC30A2      | Solute Carrier Family 30 Member 2                      | 0.06              | 0.51  | 0.59   | 9.30       | 2.01              | 1.39E-01         | -0.22         | 9.04E-01 | 4.31         | 2.42E-03 | EGA4-1    |
| ENSMMUG000000006221  | PRDX1        | Peroxiredoxin 1                                        | 20.61             | 34.23 | 28.20  | 79.90      | 0.49              | 4.54E-01         | -0.33         | 6.36E-01 | 1.47         | 3.22E-02 | EGA4-1    |
| ENSMMUG000000019081  |              |                                                        | 0.83              | 3.44  | 0.33   | 0.53       | 0.17              | 9.41E-01         | -2.78         | 7.10E-02 | 4.22         | 2.89E-02 | EGA4-1    |
| ENSMMUG000000022763  | TACSTD2      | Tumor Associated Calcium Signal Transducer 2           | 0.06              | 0.01  | 0.45   | 10.71      | -3.08             | 2.27E-01         | 1.70          | 5.55E-01 | 9.61         | 1.27E-04 | EGA4-1    |
| ENSMMUG000000003264  | LEPROT       | Leptin Receptor Overlapping Transcript                 | 4.27              | 2.30  | 1.12   | 3.80       | -2.91             | 5.57E-02         | -0.28         | 8.99E-01 | 3.91         | 4.51E-02 | EGA4-1    |
| ENSMMUG000000000647  | C1H1orf141   | Chromosome 1 Open Reading Frame, Human C1orf141        | 1.24              | 0.59  | 0.27   | 1.09       | -1.83             | 2.79E-01         | -1.69         | 3.31E-01 | 4.33         | 2.30E-02 | EGA4-1    |
| ENSMMUG000000006836  | CLCA1        | Chloride Channel Accessory 1                           | 0.10              | 0.13  | 0.43   | 8.15       | -2.01             | 3.27E-01         | 1.98          | 3.54E-01 | 4.55         | 3.86E-02 | EGA4-1    |
| ENSMMUG000000017383  | LMO4         | LIM Domain Only 4                                      | 16.23             | 6.15  | 5.78   | 16.15      | -1.60             | 2.49E-01         | -1.64         | 2.38E-01 | 4.07         | 8.60E-03 | EGA4-1    |
| ENSMMUG000000001686  | SLC44A3      | Solute Carrier Family 44 Member 3                      | 1.84              | 0.57  | 0.76   | 9.95       | -1.62             | 3.68E-01         | -1.23         | 5.09E-01 | 5.19         | 3.89E-03 | EGA4-1    |
| ENSMMUG0000000031908 | AMY2B        | Amylase, Alpha 2B (pancreatic)                         | 0.20              | 0.36  | 0.37   | 1.12       | -0.48             | 8.58E-01         | -0.81         | 7.43E-01 | 5.41         | 1.56E-02 | EGA4-1    |
| ENSMMUG0000000015671 | RHOC         | Ras Homolog Family Member C                            | 2.21              | 0.46  | 1.39   | 9.80       | -1.70             | 2.78E-01         | -0.03         | 9.89E-01 | 3.87         | 2.48E-02 | EGA4-1    |
| ENSMMUG000000000431  | MAB21L3      | Mab-21 Like 3                                          | 0.00              | 0.00  | 0.13   | 2.68       | 1.19              | 6.07E-01         | 0.22          | 9.34E-01 | 8.84         | 2.60E-07 | EGA4-1    |
| ENSMMUG000000008157  | IGSF3        | Immunoglobulin Superfamily Member 3                    | 0.95              | 1.80  | 3.40   | 8.75       | 0.20              | 8.93E-01         | 0.35          | 7.89E-01 | 3.14         | 4.42E-03 | EGA4-1    |
| ENSMMUG0000000045190 | S100A10      | S100 Calcium Binding Protein A10                       | 3.75              | 17.05 | 16.35  | 78.53      | 1.89              | 1.25E-01         | -0.41         | 7.99E-01 | 3.36         | 1.62E-02 | EGA4-1    |
| ENSMMUG0000000045106 | S100A16      | S100 Calcium Binding Protein A16                       | 0.07              | 0.62  | 1.30   | 12.23      | 1.22              | 4.56E-01         | 1.11          | 4.94E-01 | 4.15         | 1.11E-02 | EGA4-1    |
| ENSMMUG000000008144  | S100A13      | S100 Calcium Binding Protein A13                       | 0.27              | 0.03  | 0.31   | 3.69       | -2.66             | 3.62E-01         | -0.24         | 9.54E-01 | 6.91         | 2.90E-02 | EGA4-1    |
| ENSMMUG0000000040605 |              |                                                        | 0.24              | 0.88  | 1.45   | 7.48       | -0.03             | 9.89E-01         | 0.26          | 9.10E-01 | 5.81         | 9.88E-04 | EGA4-1    |
| ENSMMUG0000000005092 | ARHGEF2      | Rho/Rac Guanine Nucleotide Exchange Factor 2           | 0.47              | 0.59  | 1.25   | 4.07       | -1.03             | 5.18E-01         | 0.93          | 5.65E-01 | 4.14         | 8.03E-03 | EGA4-1    |
| ENSMMUG0000000022306 | RAB25        | RAB25, Member RAS Oncogene Family                      | 6.12              | 2.19  | 4.57   | 88.82      | -2.44             | 5.82E-02         | 1.47          | 2.92E-01 | 3.73         | 1.26E-02 | EGA4-1    |
| ENSMMUG0000000002001 | TSTD1        | Thiosulfate Sulfurtransferase Like Domain Containing 1 | 0.67              | 0.14  | 0.54   | 8.30       | -1.45             | 6.42E-01         | -0.47         | 8.93E-01 | #####        | 1.47E-11 | EGA4-1    |
| ENSMMUG0000000042745 |              |                                                        | 0.01              | 0.27  | 0.37   | 6.68       | 1.73              | 3.42E-01         | 1.75          | 2.79E-01 | 6.90         | 2.49E-05 | EGA4-1    |
| ENSMMUG0000000013884 | IVNS1ABP     | Influenza Virus NS1A Binding Protein                   | 10.22             | 8.20  | 9.15   | 21.38      | 0.25              | 7.92E-01         | -0.46         | 5.81E-01 | 1.95         | 1.80E-02 | EGA4-1    |
| ENSMMUG0000000001479 | LAMC2        | Laminin Subunit Gamma 2                                | 0.29              | 0.54  | 1.47   | 4.65       | -0.53             | 7.90E-01         | -2.51         | 1.04E-01 | 5.49         | 6.85E-04 | EGA4-1    |
| ENSMMUG0000000006261 | TOR3A        | Torsin Family 3 Member A                               | 0.50              | 0.13  | 0.79   | 3.33       | -3.04             | 9.43E-02         | 1.78          | 3.74E-01 | 4.39         | 4.21E-02 | EGA4-1    |
| ENSMMUG0000000000546 | KIAA0040     | KIAA0040 Ortholog                                      | 0.95              | 1.25  | 0.92   | 12.37      | -0.47             | 8.02E-01         | -1.97         | 1.85E-01 | 3.95         | 1.64E-02 | EGA4-1    |
| ENSMMUG0000000012716 | NID1         | Nidogen 1                                              | 0.65              | 1.34  | 1.61   | 11.95      | 1.61              | 2.63E-01         | -1.77         | 2.07E-01 | 3.97         | 9.40E-03 | EGA4-1    |
| ENSMMUG0000000005668 | KMO          | Kynurenine 3-monooxygenase                             | 0.01              | 0.04  | 0.06   | 1.46       | 2.53              | 4.01E-01         | -0.74         | 8.28E-01 | 7.34         | 1.17E-02 | EGA4-1    |
| ENSMMUG0000000011424 | EFCAB2       | EF-hand Calcium Binding Domain 2                       | 4.77              | 2.71  | 2.06   | 5.57       | -1.40             | 2.59E-01         | -0.86         | 5.25E-01 | 3.33         | 1.52E-02 | EGA4-1    |
| ENSMMUG0000000046911 | LOC100428218 | Olfactory Receptor 2L8-like                            | 0.52              | 1.17  | 1.74   | 0.50       | 0.43              | 8.87E-01         | -1.34         | 6.11E-01 | 6.19         | 1.01E-02 | EGA4-1    |
| ENSMMUG0000000039964 |              |                                                        | 0.29              | 0.07  | 0.13   | 1.88       | -2.00             | 3.90E-01         | 0.09          | 9.79E-01 | 6.68         | 5.42E-03 | EGA4-1    |
| ENSMMUG0000000000075 | LRRCS8       | Leucine Rich Repeat Containing 58                      | 0.62              | 1.60  | 2.44   | 8.26       | -0.20             | 9.28E-01         | -0.71         | 7.06E-01 | 5.51         | 7.27E-04 | EGA4-1    |
| ENSMMUG0000000001048 | EAF2         | ELL Associated Factor 2                                | 0.35              | 1.44  | 2.75   | 5.31       | 1.08              | 6.28E-01         | 1.17          | 5.76E-01 | 4.95         | 1.79E-02 | EGA4-1    |
| ENSMMUG0000000018445 | WNT7A        | Wnt Family Member 7A                                   | 0.00              | 0.04  | 0.24   | 1.21       | 3.15              | 3.20E-01         | -0.81         | 8.29E-01 | 7.08         | 3.24E-02 | EGA4-1    |
| ENSMMUG0000000009693 | SUCLG2       | Succinate-CoA Ligase GDP-forming Beta Subunit          | 3.06              | 2.93  | 1.72   | 10.57      | 0.53              | 7.16E-01         | -1.74         | 1.36E-01 | 4.33         | 3.96E-04 | EGA4-1    |
| ENSMMUG0000000046170 |              |                                                        | 0.04              | 0.13  | 0.16   | 0.86       | 5.29              | 3.66E-01         | -7.36         | 1.73E-01 | #####        | 4.23E-02 | EGA4-1    |
| ENSMMUG0000000010498 | HEMK1        | HemK Methyltransferase Family Member 1                 | 0.47              | 0.34  | 0.26   | 1.31       | -0.94             | 6.26E-01         | -0.35         | 8.77E-01 | 4.45         | 2.13E-02 | EGA4-1    |

|                      |              |                                                                      |       |       |       |       |       |          |       |          |      |          |        |
|----------------------|--------------|----------------------------------------------------------------------|-------|-------|-------|-------|-------|----------|-------|----------|------|----------|--------|
| ENSMMUG00000015418   | SLC25A20     | Solute Carrier Family 25 Member 20                                   | 0.19  | 0.87  | 2.30  | 2.89  | 1.23  | 4.94E-01 | 2.47  | 9.60E-02 | 3.66 | 4.98E-02 | EGA4-1 |
| ENSMMUG00000003074   | PLXNB1       | Plexin B1                                                            | 0.05  | 0.05  | 0.23  | 1.26  | -1.05 | 6.45E-01 | 1.40  | 5.12E-01 | 5.33 | 1.15E-02 | EGA4-1 |
| ENSMMUG00000045278   | ACKR2        | Atypical Chemokine Receptor 2                                        | 0.02  | 0.07  | 0.27  | 2.56  | 0.31  | 8.93E-01 | 2.84  | 5.16E-02 | 4.22 | 1.31E-02 | EGA4-1 |
| ENSMMUG00000002953   | MAGEF1       | MAGE Family Member F1                                                | 0.13  | 0.73  | 1.64  | 1.57  | 1.89  | 3.61E-01 | 0.74  | 7.40E-01 | 5.68 | 4.24E-03 | EGA4-1 |
| ENSMMUG00000018530   | LOC706634    | Glutathione S-transferase Theta-2B                                   | 0.62  | 0.10  | 0.33  | 2.33  | -3.73 | 8.50E-02 | -0.48 | 8.75E-01 | 5.86 | 1.83E-02 | EGA4-1 |
| ENSMMUG00000003541   | B3GALNT1     | Beta-1,3-N-acetylgalactosaminyltransferase 1 (globoside Blood Group) | 15.00 | 5.65  | 6.59  | 7.80  | -1.50 | 1.70E-01 | -1.02 | 3.78E-01 | 2.59 | 4.49E-02 | EGA4-1 |
| ENSMMUG000000038641  |              |                                                                      | 0.43  | 3.14  | 0.08  | 1.32  | 0.40  | 9.26E-01 | -4.64 | 1.10E-01 | 8.92 | 6.18E-03 | EGA4-1 |
| ENSMMUG000000038292  |              |                                                                      | 0.76  | 1.91  | 0.20  | 3.63  | 2.84  | 2.98E-01 | -1.44 | 6.27E-01 | 6.71 | 2.29E-02 | EGA4-1 |
| ENSMMUG00000009010   | CRTAP        | Cartilage Associated Protein                                         | 3.23  | 2.32  | 3.98  | 20.47 | -2.28 | 1.07E-01 | 0.07  | 9.71E-01 | 4.69 | 1.88E-03 | EGA4-1 |
| ENSMMUG00000000949   | FGF12        | Fibroblast Growth Factor 12                                          | 2.86  | 0.97  | 2.68  | 3.10  | -3.30 | 5.41E-02 | 0.35  | 8.85E-01 | 6.52 | 5.39E-04 | EGA4-1 |
| ENSMMUG00000002722   | LOC722784    | SH3 Domain And Tetratricopeptide Repeat-containing Protein 1-like    | 2.97  | 2.72  | 1.48  | 3.16  | -0.45 | 7.46E-01 | -1.88 | 8.23E-02 | 2.71 | 4.17E-02 | EGA4-1 |
| ENSMMUG000000039566  | LOC106998240 | Putative MORF4 Family-associated Protein 1-like Protein UPP          | 0.15  | 0.09  | 1.24  | 2.95  | -1.15 | 5.65E-01 | 0.70  | 7.52E-01 | 6.35 | 5.21E-04 | EGA4-1 |
| ENSMMUG000000045562  | BLOC1S4      | Biogenesis Of Lysosomal Organelles Complex 1 Subunit 4               | 2.42  | 1.41  | 0.49  | 3.19  | -3.23 | 5.66E-02 | -0.61 | 7.92E-01 | 6.00 | 1.77E-03 | EGA4-1 |
| ENSMMUG00000015808   |              |                                                                      | 0.48  | 0.60  | 1.45  | 0.19  | -2.49 | 3.20E-01 | -0.90 | 7.65E-01 | 6.39 | 2.66E-02 | EGA4-1 |
| ENSMMUG00000022311   | PLAC8        | Placenta Specific 8                                                  | 0.01  | 0.08  | 7.02  | 54.26 | 3.42  | 5.52E-02 | 2.80  | 9.01E-02 | 4.91 | 5.21E-03 | EGA4-1 |
| ENSMMUG000000020913  | SCARB2       | Scavenger Receptor Class B Member 2                                  | 4.50  | 8.43  | 4.43  | 21.18 | -0.94 | 5.41E-01 | -0.46 | 7.88E-01 | 4.47 | 1.61E-03 | EGA4-1 |
| ENSMMUG000000044223  |              |                                                                      | 34.54 | 17.44 | 11.22 | 30.89 | -0.86 | 4.49E-01 | -1.43 | 1.70E-01 | 2.65 | 2.87E-02 | EGA4-1 |
| ENSMMUG000000008793  | SPP1         | Secreted Phosphoprotein 1                                            | 0.47  | 0.07  | 0.05  | 0.97  | -1.96 | 6.11E-01 | -2.72 | 4.60E-01 | 9.76 | 6.81E-03 | EGA4-1 |
| ENSMMUG000000008797  | ABCG2        | ATP Binding Cassette Subfamily G Member 2 (Junior Blood Group)       | 0.31  | 0.07  | 0.47  | 5.56  | -2.29 | 1.41E-01 | -1.47 | 4.17E-01 | 6.50 | 5.63E-05 | EGA4-1 |
| ENSMMUG000000022246  | PDLIM5       | PDZ And LIM Domain 5                                                 | 2.39  | 3.01  | 6.50  | 16.40 | 0.17  | 8.51E-01 | 0.89  | 1.71E-01 | 1.79 | 1.52E-02 | EGA4-1 |
| ENSMMUG00000016880   | SLC39A8      | Solute Carrier Family 39 Member 8                                    | 0.19  | 0.13  | 1.39  | 17.72 | -1.56 | 3.26E-01 | 2.67  | 5.76E-02 | 6.81 | 1.37E-06 | EGA4-1 |
| ENSMMUG000000003736  | NFKB1        | Nuclear Factor Kappa B Subunit 1                                     | 0.51  | 0.25  | 0.53  | 2.29  | -1.78 | 1.81E-01 | -0.98 | 5.16E-01 | 5.85 | 1.54E-05 | EGA4-1 |
| ENSMMUG00000017004   | PPA2         | Pyrophosphatase (inorganic) 2                                        | 0.45  | 0.65  | 2.02  | 10.56 | 0.90  | 6.23E-01 | 0.63  | 7.42E-01 | 4.70 | 5.54E-03 | EGA4-1 |
| ENSMMUG00000017831   | TET2         | Tet Methylcytosine Dioxygenase 2                                     | 6.42  | 8.16  | 15.00 | 94.39 | -0.01 | 9.93E-01 | 0.75  | 4.12E-01 | 2.85 | 1.27E-03 | EGA4-1 |
| ENSMMUG000000005517  | ENPEP        | Glutamyl Aminopeptidase                                              | 0.36  | 0.25  | 1.34  | 31.15 | -1.12 | 4.20E-01 | -1.58 | 2.41E-01 | 9.35 | 3.76E-15 | EGA4-1 |
| ENSMMUG000000004371  |              |                                                                      | 0.07  | 0.36  | 0.44  | 3.24  | 2.27  | 2.90E-01 | -0.38 | 8.84E-01 | 6.14 | 4.25E-03 | EGA4-1 |
| ENSMMUG000000004977  | TMEM184C     | Transmembrane Protein 184C                                           | 32.57 | 29.37 | 22.70 | 56.66 | -0.30 | 6.52E-01 | -0.63 | 2.71E-01 | 1.44 | 2.46E-02 | EGA4-1 |
| ENSMMUG000000022900  | PDGFC        | Platelet Derived Growth Factor C                                     | 2.12  | 0.93  | 1.64  | 11.03 | -0.15 | 9.45E-01 | -1.50 | 3.62E-01 | 6.54 | 3.03E-05 | EGA4-1 |
| ENSMMUG000000004448  | TMEM144      | Transmembrane Protein 144                                            | 3.43  | 0.51  | 0.64  | 4.84  | -1.21 | 5.66E-01 | -3.25 | 7.65E-02 | 7.50 | 9.74E-05 | EGA4-1 |
| ENSMMUG0000000039955 | MSMO1        | Methylsterol Monoxygenase 1                                          | 1.39  | 1.78  | 2.45  | 9.11  | 1.04  | 2.65E-01 | -0.38 | 7.34E-01 | 2.45 | 1.54E-02 | EGA4-1 |
| ENSMMUG00000010967   | TRIML2       | Tripartite Motif Family Like 2                                       | 5.32  | 6.65  | 12.22 | 35.04 | -0.09 | 9.47E-01 | 0.49  | 6.66E-01 | 2.43 | 2.60E-02 | EGA4-1 |
| ENSMMUG00000002083   |              |                                                                      | 59.41 | 40.01 | 60.64 | ##### | -0.59 | 3.19E-01 | 0.14  | 8.52E-01 | 1.61 | 9.88E-03 | EGA4-1 |
| ENSMMUG00000018079   | TMPRSS3      | Transmembrane Protease, Serine 3                                     | 0.02  | 0.10  | 0.08  | 2.10  | 1.02  | 6.89E-01 | 0.60  | 8.17E-01 | 7.46 | 3.82E-04 | EGA4-1 |
| ENSMMUG00000018043   | RIPK4        | Receptor Interacting Serine/threonine Kinase 4                       | 0.01  | 0.06  | 0.61  | 1.98  | 1.97  | 3.30E-01 | 1.64  | 3.74E-01 | 4.24 | 2.99E-02 | EGA4-1 |
| ENSMMUG00000014384   | APP          | Amyloid Beta Precursor Protein                                       | 3.79  | 8.77  | 8.19  | 62.62 | 1.42  | 2.00E-01 | -0.82 | 4.94E-01 | 4.06 | 2.26E-04 | EGA4-1 |
| ENSMMUG00000019005   | TTYH3        | Tweety Family Member 3                                               | 0.49  | 0.57  | 1.44  | 7.92  | -0.21 | 9.07E-01 | -0.48 | 7.60E-01 | 3.11 | 2.99E-02 | EGA4-1 |
| ENSMMUG000000020088  | STYXL1       | Serine/threonine/tyrosine Interacting Like 1                         | 0.58  | 0.33  | 0.52  | 0.62  | -0.90 | 7.10E-01 | -3.36 | 8.20E-02 | 6.64 | 1.19E-03 | EGA4-1 |
| ENSMMUG000000011173  | TWIST1       | Twist Family BHLH Transcription Factor 1                             | 0.13  | 0.11  | 0.32  | 4.62  | -1.49 | 5.45E-01 | -2.69 | 2.46E-01 | 8.61 | 1.43E-04 | EGA4-1 |
| ENSMMUG000000007470  | CDK14        | Cyclin Dependent Kinase 14                                           | 0.12  | 0.10  | 0.27  | 1.46  | -1.25 | 4.67E-01 | -0.01 | 9.96E-01 | 5.97 | 2.72E-04 | EGA4-1 |
| ENSMMUG000000038190  | LOC703490    | Lanosterol 14-alpha Demethylase                                      | 2.83  | 6.49  | 2.81  | 7.71  | 0.86  | 4.20E-01 | -1.68 | 6.96E-02 | 2.37 | 3.79E-02 | EGA4-1 |
| ENSMMUG000000039654  | COL1A2       | Collagen Type I Alpha 2 Chain                                        | 0.01  | 0.01  | 0.07  | 2.77  | 1.85  | 4.70E-01 | -1.26 | 6.28E-01 | 9.91 | 2.16E-06 | EGA4-1 |
| ENSMMUG000000008014  | PON2         | Paraoxonase 2                                                        | 2.56  | 3.58  | 4.26  | 9.28  | 0.65  | 6.93E-01 | -1.06 | 4.80E-01 | 5.02 | 4.24E-04 | EGA4-1 |
| ENSMMUG000000005250  | SLC25A13     | Solute Carrier Family 25 Member 13                                   | 2.36  | 0.57  | 3.57  | 12.50 | -1.69 | 1.72E-01 | 0.61  | 6.81E-01 | 3.04 | 3.19E-02 | EGA4-1 |
| ENSMMUG000000007375  | EPHB4        | EPH Receptor B4                                                      | 0.40  | 1.89  | 0.36  | 2.39  | -1.20 | 4.47E-01 | -2.65 | 5.79E-02 | 7.33 | 3.21E-07 | EGA4-1 |
| ENSMMUG000000019593  | SYPL1        | Synaptophysin Like 1                                                 | 3.48  | 8.36  | 7.42  | 19.51 | 1.15  | 2.53E-01 | -0.40 | 7.38E-01 | 3.15 | 2.05E-03 | EGA4-1 |
| ENSMMUG000000002439  | WNT16        | Wnt Family Member 16                                                 | 0.01  | 0.01  | 0.81  | 9.84  | -0.33 | 9.17E-01 | -0.16 | 9.62E-01 | 9.54 | 2.25E-06 | EGA4-1 |
| ENSMMUG000000038073  |              |                                                                      | 0.18  | 2.45  | 18.56 | ##### | 3.21  | 1.40E-01 | 1.22  | 5.90E-01 | 6.64 | 1.13E-03 | EGA4-1 |
| ENSMMUG000000019358  | AHCYL2       | Adenosylhomocysteinase Like 2                                        | 1.19  | 0.78  | 0.64  | 5.56  | -0.83 | 4.64E-01 | -0.29 | 8.31E-01 | 3.47 | 1.28E-03 | EGA4-1 |

|                     |           |                                                             |       |       |       |       |        |          |       |          |       |          |        |
|---------------------|-----------|-------------------------------------------------------------|-------|-------|-------|-------|--------|----------|-------|----------|-------|----------|--------|
| ENSMMUG00000010134  | ARHGEF5   | Rho Guanine Nucleotide Exchange Factor 5                    | 2.61  | 0.84  | 0.50  | 1.79  | -1.99  | 8.03E-02 | -1.05 | 4.09E-01 | 2.84  | 4.17E-02 | EGA4-1 |
| ENSMMUG00000022633  | REPIN1    | Replication Initiator 1                                     | 5.30  | 1.11  | 2.11  | 3.08  | -2.26  | 7.29E-02 | -1.23 | 3.79E-01 | 3.40  | 2.40E-02 | EGA4-1 |
| ENSMMUG00000008596  | TMEM176B  | Transmembrane Protein 176B                                  | 0.60  | 1.07  | 1.06  | 1.52  | -1.81  | 4.00E-01 | -1.59 | 4.64E-01 | 6.19  | 3.58E-03 | EGA4-1 |
| ENSMMUG00000043576  |           |                                                             | 0.69  | 3.22  | 0.51  | 1.34  | -0.20  | 9.75E-01 | -6.68 | 1.27E-01 | ##### | 4.80E-02 | EGA4-1 |
| ENSMMUG00000022423  |           |                                                             | 0.09  | 0.60  | 0.10  | 1.02  | 1.28   | 5.93E-01 | -1.50 | 5.24E-01 | 5.10  | 3.62E-02 | EGA4-1 |
| ENSMMUG00000001226  | HMGCS1    | 3-hydroxy-3-methylglutaryl-CoA Synthase 1                   | 15.61 | 21.58 | 33.95 | 93.23 | 0.35   | 7.60E-01 | -1.14 | 2.13E-01 | 2.83  | 3.44E-03 | EGA4-1 |
| ENSMMUG000000011734 | NNT       | Nicotinamide Nucleotide Transhydrogenase                    | 0.26  | 0.34  | 0.39  | 6.24  | -1.88  | 1.73E-01 | -0.73 | 6.54E-01 | 7.38  | 7.13E-09 | EGA4-1 |
| ENSMMUG00000000399  | KIF2A     | Kinesin Family Member 2A                                    | 3.08  | 2.74  | 6.49  | 15.25 | 0.10   | 8.90E-01 | 0.90  | 7.29E-02 | 1.72  | 1.97E-03 | EGA4-1 |
| ENSMMUG00000022988  | F2RL2     | Coagulation Factor II Thrombin Receptor Like 2              | 0.01  | 0.01  | 0.15  | 1.89  | 0.34   | 9.01E-01 | 2.00  | 2.81E-01 | 6.86  | 1.41E-04 | EGA4-1 |
| ENSMMUG00000042643  | GPX3      | Glutathione Peroxidase 3                                    | 7.47  | 6.78  | 0.85  | 3.02  | -2.09  | 1.75E-01 | -1.69 | 2.91E-01 | 3.66  | 4.61E-02 | EGA4-1 |
| ENSMMUG00000021053  | ANXA6     | Annexin A6                                                  | 2.35  | 0.97  | 1.82  | 11.83 | -1.34  | 3.52E-01 | 0.49  | 7.78E-01 | 5.42  | 7.20E-05 | EGA4-1 |
| ENSMMUG00000001850  | SPARC     | Secreted Protein Acidic And Cysteine Rich                   | 5.76  | 0.80  | 0.61  | 5.10  | -2.26  | 6.40E-02 | -2.27 | 6.40E-02 | 5.23  | 3.82E-05 | EGA4-1 |
| ENSMMUG000000022891 | DBN1      | Drebrin 1                                                   | 0.57  | 2.02  | 2.59  | 2.10  | 1.19   | 4.40E-01 | -1.17 | 4.47E-01 | 3.34  | 4.68E-02 | EGA4-1 |
| ENSMMUG00000043046  |           |                                                             | 0.08  | 0.00  | 0.17  | 1.72  | -13.32 | 5.40E-02 | -2.59 | 7.76E-01 | ##### | 6.91E-06 | EGA4-1 |
| ENSMMUG00000010208  | NRN1      | Neuritin 1                                                  | 0.13  | 0.01  | 0.08  | 1.22  | -1.13  | 6.82E-01 | 2.16  | 3.66E-01 | 5.49  | 2.20E-02 | EGA4-1 |
| ENSMMUG00000048362  |           |                                                             | 0.07  | 0.09  | 1.26  | 1.72  | -0.04  | 9.86E-01 | 1.26  | 4.30E-01 | 4.29  | 7.59E-03 | EGA4-1 |
| ENSMMUG00000020040  | PHACTR1   | Phosphatase And Actin Regulator 1                           | 0.61  | 0.11  | 0.05  | 1.56  | -2.84  | 1.12E-01 | -1.51 | 4.70E-01 | 4.92  | 2.36E-02 | EGA4-1 |
| ENSMMUG00000004732  | BTN2A2    | Butyrophilin Subfamily 2 Member A2                          | 0.30  | 0.28  | 0.15  | 0.81  | -0.92  | 7.35E-01 | -1.65 | 4.93E-01 | 8.01  | 4.24E-04 | EGA4-1 |
| ENSMMUG00000007227  | ZSCAN26   | Zinc Finger And SCAN Domain Containing 26                   | 4.08  | 2.23  | 0.90  | 1.68  | -1.17  | 3.83E-01 | -1.75 | 1.57E-01 | 3.61  | 1.07E-02 | EGA4-1 |
| ENSMMUG00000015682  |           |                                                             | 1.52  | 1.17  | 0.18  | 2.30  | -0.23  | 9.37E-01 | -3.06 | 1.21E-01 | 6.14  | 4.64E-03 | EGA4-1 |
| ENSMMUG000000011304 | PSMB9     | Proteasome Subunit Beta 9                                   | 0.01  | 2.10  | 0.04  | 0.65  | 2.39   | 3.85E-01 | -2.56 | 3.41E-01 | 6.15  | 4.54E-02 | EGA4-1 |
| ENSMMUG00000014508  | KCTD20    | Potassium Channel Tetramerization Domain Containing 20      | 0.66  | 0.60  | 0.73  | 2.98  | -0.11  | 9.47E-01 | -1.02 | 4.45E-01 | 3.48  | 1.35E-02 | EGA4-1 |
| ENSMMUG000000011670 | PTK7      | Protein Tyrosine Kinase 7 (inactive)                        | 0.31  | 0.62  | 0.65  | 5.05  | 0.68   | 6.88E-01 | -0.48 | 7.86E-01 | 4.60  | 1.65E-03 | EGA4-1 |
| ENSMMUG000000000815 | FAM83B    | Family With Sequence Similarity 83 Member B                 | 0.18  | 0.52  | 1.17  | 9.21  | 2.10   | 6.10E-02 | -1.27 | 2.94E-01 | 4.24  | 3.82E-04 | EGA4-1 |
| ENSMMUG000000005032 | MYO6      | Myosin VI                                                   | 11.05 | 5.08  | 2.87  | 17.18 | -1.20  | 9.82E-02 | -1.25 | 7.96E-02 | 2.66  | 4.89E-04 | EGA4-1 |
| ENSMMUG00000046434  | SH3BGL2   | SH3 Domain Binding Glutamate Rich Protein Like 2            | 8.91  | 12.02 | 35.07 | ##### | 0.42   | 6.95E-01 | 1.33  | 1.19E-01 | 2.43  | 1.33E-02 | EGA4-1 |
| ENSMMUG00000012592  | ME1       | Malic Enzyme 1                                              | 0.98  | 0.62  | 0.29  | 1.36  | -0.46  | 8.48E-01 | -3.24 | 6.08E-02 | 4.17  | 4.70E-02 | EGA4-1 |
| ENSMMUG00000044935  |           |                                                             | 0.16  | 0.27  | 0.20  | 1.06  | -1.83  | 4.50E-01 | 0.73  | 7.95E-01 | 6.70  | 6.07E-03 | EGA4-1 |
| ENSMMUG00000005366  | FUCA2     | Alpha-L-fucosidase 2                                        | 3.73  | 3.78  | 8.02  | 45.20 | -1.12  | 3.54E-01 | 0.74  | 5.63E-01 | 4.79  | 1.45E-05 | EGA4-1 |
| ENSMMUG00000015355  | RSPO3     | R-spondin 3                                                 | 0.00  | 0.03  | 0.03  | 5.01  | 2.63   | 3.86E-01 | -0.27 | 9.47E-01 | 6.52  | 3.67E-02 | EGA4-1 |
| ENSMMUG00000017165  | BAHD1     | Bromo Adjacent Homology Domain Containing 1                 | 0.98  | 1.61  | 2.31  | 1.87  | 0.18   | 9.19E-01 | -1.57 | 2.08E-01 | 2.97  | 4.17E-02 | EGA4-1 |
| ENSMMUG00000021840  | STRC      | Stereocilin                                                 | 0.09  | 0.41  | 0.34  | 1.00  | 0.83   | 6.74E-01 | -0.85 | 6.61E-01 | 4.23  | 2.30E-02 | EGA4-1 |
| ENSMMUG00000001362  | VPS13C    | Vacuolar Protein Sorting 13 Homolog C                       | 1.75  | 1.13  | 1.54  | 5.78  | -0.38  | 6.74E-01 | -0.66 | 4.08E-01 | 2.44  | 1.79E-03 | EGA4-1 |
| ENSMMUG00000013725  | LOC704249 | Phosphoglycerate Kinase 1-like                              | 1.43  | 4.30  | 9.70  | 33.35 | 2.11   | 6.92E-02 | 0.79  | 5.60E-01 | 3.01  | 2.95E-02 | EGA4-1 |
| ENSMMUG00000046622  | HEXA      | Hexosaminidase Subunit Alpha                                | 1.16  | 5.00  | 6.01  | 13.07 | 0.88   | 5.50E-01 | 0.51  | 7.50E-01 | 4.36  | 1.26E-03 | EGA4-1 |
| ENSMMUG00000016106  | SNX33     | Sorting Nexin 33                                            | 0.15  | 0.26  | 0.05  | 4.99  | -3.48  | 6.11E-02 | 0.34  | 9.06E-01 | 8.10  | 2.09E-05 | EGA4-1 |
| ENSMMUG00000005103  | MAN2A2    | Mannosidase Alpha Class 2A Member 2                         | 0.12  | 0.68  | 1.41  | 4.56  | 1.68   | 1.81E-01 | 2.18  | 6.05E-02 | 3.65  | 6.63E-03 | EGA4-1 |
| ENSMMUG00000046119  | HDHC3     | HD Domain Containing 3                                      | 0.08  | 0.97  | 0.54  | 1.81  | 1.46   | 2.88E-01 | -0.12 | 9.48E-01 | 4.44  | 1.06E-03 | EGA4-1 |
| ENSMMUG00000006848  | OSGEP     | O-sialoglycoprotein Endopeptidase                           | 0.33  | 5.21  | 2.33  | 5.43  | 2.42   | 1.36E-01 | -0.81 | 6.81E-01 | 4.42  | 1.71E-02 | EGA4-1 |
| ENSMMUG00000012576  | LOC693626 | Sorting Nexin-6                                             | 17.45 | 12.21 | 17.61 | 38.25 | -0.47  | 2.30E-01 | 0.35  | 3.79E-01 | 1.15  | 5.14E-03 | EGA4-1 |
| ENSMMUG00000009653  | FOXA1     | Forkhead Box A1                                             | 0.00  | 0.04  | 2.51  | 0.92  | 2.88   | 2.87E-01 | -1.60 | 5.74E-01 | 6.28  | 3.08E-02 | EGA4-1 |
| ENSMMUG00000020885  | TMEM260   | Transmembrane Protein 260                                   | 0.72  | 1.13  | 0.63  | 1.41  | -0.67  | 7.42E-01 | -0.92 | 6.31E-01 | 4.03  | 3.73E-02 | EGA4-1 |
| ENSMMUG00000007762  | OTUB2     | OTU Deubiquitinase, Ubiquitin Aldehyde Binding 2            | 0.39  | 1.87  | 0.24  | 0.76  | 0.47   | 8.65E-01 | -2.76 | 1.65E-01 | 5.14  | 2.67E-02 | EGA4-1 |
| ENSMMUG00000004931  | SYNE3     | Spectrin Repeat Containing Nuclear Envelope Family Member 3 | 0.02  | 0.35  | 0.18  | 1.39  | 3.71   | 7.42E-02 | -2.25 | 2.92E-01 | 8.05  | 1.07E-04 | EGA4-1 |
| ENSMMUG00000011475  | CRIP2     | Cysteine Rich Protein 2                                     | 0.29  | 1.26  | 0.26  | 0.63  | 1.98   | 5.51E-01 | -5.17 | 6.26E-02 | 8.00  | 1.45E-02 | EGA4-1 |

|                     |         |                                                             |       |       |       |       |       |          |       |          |       |          |        |
|---------------------|---------|-------------------------------------------------------------|-------|-------|-------|-------|-------|----------|-------|----------|-------|----------|--------|
| ENSMMUG00000017378  | STS     | Steroid Sulfatase                                           | 0.29  | 1.48  | 0.53  | 10.57 | 0.48  | 7.94E-01 | -1.79 | 2.17E-01 | 7.31  | 8.38E-08 | EGA4-1 |
| ENSMMUG00000016290  | WWC3    | WWC Family Member 3                                         | 2.55  | 5.99  | 1.70  | 11.51 | 0.52  | 7.51E-01 | -2.18 | 8.17E-02 | 4.71  | 4.44E-04 | EGA4-1 |
| ENSMMUG00000008335  | SAT1    | Spermidine/spermine N1-acetyltransferase 1                  | 1.51  | 0.86  | 3.32  | 10.79 | -0.83 | 6.12E-01 | 1.44  | 3.28E-01 | 3.40  | 3.79E-02 | EGA4-1 |
| ENSMMUG00000048579  | SLC39A1 | Solute Carrier Family 39 Member 1                           | 0.36  | 2.67  | 3.19  | 6.37  | 0.05  | 9.85E-01 | 1.67  | 3.47E-01 | 4.39  | 2.25E-02 | EGA4-1 |
| ENSMMUG00000045510  |         |                                                             | 0.19  | 0.70  | 0.53  | 2.95  | 1.56  | 2.50E-01 | -0.19 | 9.17E-01 | 3.37  | 2.26E-02 | EGA4-1 |
| ENSMMUG00000013943  | GDPD2   | Glycerophosphodiester Phosphodiesterase Domain Containing 2 | 0.01  | 0.00  | 0.16  | 0.75  | -0.25 | 9.36E-01 | 1.61  | 4.82E-01 | 7.21  | 5.83E-04 | EGA4-1 |
| ENSMMUG00000017795  | IL2RG   | Interleukin 2 Receptor Subunit Gamma                        | 0.42  | 1.41  | 0.21  | 0.52  | -0.10 | 9.71E-01 | -1.87 | 3.45E-01 | 5.72  | 7.64E-03 | EGA4-1 |
| ENSMMUG00000001689  | SH3BGRL | SH3 Domain Binding Glutamate Rich Protein Like              | 0.86  | 2.14  | 3.72  | 22.32 | -0.47 | 7.95E-01 | 2.06  | 1.32E-01 | 4.32  | 4.15E-03 | EGA4-1 |
| ENSMMUG00000012702  | NAP1L3  | Nucleosome Assembly Protein 1 Like 3                        | 0.09  | 0.20  | 0.46  | 1.94  | 0.84  | 7.69E-01 | 0.29  | 9.27E-01 | 5.97  | 2.13E-02 | EGA4-1 |
| ENSMMUG00000008209  | TSPAN6  | Tetraspanin 6                                               | 0.31  | 0.26  | 0.74  | 2.48  | -0.04 | 9.79E-01 | 0.03  | 9.87E-01 | 3.07  | 1.45E-02 | EGA4-1 |
| ENSMMUG00000002173  | BEX1    | Brain Expressed X-linked 1                                  | 3.26  | 1.41  | 0.92  | 8.19  | -2.51 | 5.01E-02 | 0.20  | 9.15E-01 | 3.45  | 2.65E-02 | EGA4-1 |
| ENSMMUG00000003500  | TCEAL1  | Transcription Elongation Factor A Like 1                    | 1.50  | 0.47  | 0.36  | 2.08  | -2.96 | 8.03E-02 | -0.65 | 7.74E-01 | 5.71  | 2.82E-03 | EGA4-1 |
| ENSMMUG000000021412 | RNF128  | Ring Finger Protein 128, E3 Ubiquitin Protein Ligase        | 0.01  | 0.06  | 0.17  | 0.97  | 4.29  | 6.23E-02 | -2.82 | 2.08E-01 | 8.48  | 2.29E-04 | EGA4-1 |
| ENSMMUG00000001484  | LAMP2   | Lysosomal Associated Membrane Protein 2                     | 13.08 | 19.71 | 13.67 | 48.84 | 0.54  | 5.36E-01 | -1.41 | 5.22E-02 | 2.18  | 1.05E-02 | EGA4-1 |
| ENSMMUG000000047144 |         |                                                             | 0.01  | 0.39  | 1.45  | 13.30 | 4.02  | 1.18E-01 | -2.45 | 3.50E-01 | 8.30  | 1.38E-03 | EGA4-1 |
| ENSMMUG000000009470 | CLN8    | CLN8, Transmembrane ER And ERGIC Protein                    | 2.80  | 0.72  | 1.17  | 11.15 | -2.16 | 9.87E-02 | 0.03  | 9.89E-01 | 3.37  | 2.95E-02 | EGA4-1 |
| ENSMMUG000000043218 |         |                                                             | 0.60  | 0.34  | 1.89  | 11.58 | -0.08 | 9.73E-01 | 0.95  | 6.26E-01 | 4.89  | 7.76E-03 | EGA4-1 |
| ENSMMUG000000021515 | EPHX2   | Epoxide Hydrolase 2                                         | 0.11  | 0.13  | 0.34  | 1.20  | -2.86 | 9.45E-02 | 2.59  | 1.30E-01 | 4.74  | 1.78E-02 | EGA4-1 |
| ENSMMUG000000041477 | FAM110B | Family With Sequence Similarity 110 Member B                | 0.16  | 0.12  | 0.02  | 1.02  | -4.72 | 1.05E-01 | -1.39 | 7.04E-01 | ##### | 6.35E-05 | EGA4-1 |
| ENSMMUG000000006663 | DECR1   | 2,4-dienoyl-CoA Reductase 1                                 | 1.15  | 0.75  | 1.74  | 6.40  | -1.23 | 4.34E-01 | 1.08  | 4.95E-01 | 3.72  | 2.30E-02 | EGA4-1 |
| ENSMMUG000000013579 | SLC45A4 | Solute Carrier Family 45 Member 4                           | 1.31  | 1.07  | 0.43  | 3.19  | -1.37 | 3.08E-01 | -1.53 | 2.61E-01 | 4.43  | 1.79E-03 | EGA4-1 |
| ENSMMUG00000001633  | GSDMD   | Gasdermin D                                                 | 0.34  | 0.16  | 0.18  | 0.86  | -2.19 | 1.92E-01 | 0.66  | 7.61E-01 | 4.24  | 3.20E-02 | EGA4-1 |
| ENSMMUG00000000388  | PLEC    | Plectin                                                     | 0.23  | 0.39  | 2.23  | 8.91  | -2.12 | 1.42E-01 | 0.24  | 9.05E-01 | 8.10  | 8.77E-10 | EGA4-1 |
| ENSMMUG000000014716 | MROH1   | Maestro Heat Like Repeat Family Member 1                    | 0.43  | 0.33  | 0.41  | 2.60  | -2.31 | 8.06E-02 | 0.55  | 7.44E-01 | 4.68  | 9.89E-04 | EGA4-1 |
| ENSMMUG000000048848 |         |                                                             | 1.22  | 2.80  | 1.85  | 4.32  | 0.38  | 7.99E-01 | -1.29 | 2.85E-01 | 2.96  | 2.78E-02 | EGA4-1 |
| ENSMMUG000000020212 | SCNN1A  | Sodium Channel Epithelial 1 Alpha Subunit                   | 2.44  | 1.84  | 3.52  | 13.07 | -0.33 | 8.59E-01 | -1.84 | 1.75E-01 | 3.76  | 1.33E-02 | EGA4-1 |
| ENSMMUG000000010203 | PTPN6   | Protein Tyrosine Phosphatase, Non-receptor Type 6           | 0.05  | 0.00  | 0.11  | 2.10  | -0.73 | 8.11E-01 | 1.31  | 6.24E-01 | 6.73  | 2.38E-03 | EGA4-1 |
| ENSMMUG000000017633 | HEBP1   | Heme Binding Protein 1                                      | 0.02  | 0.27  | 1.16  | 10.67 | 2.13  | 3.34E-01 | 2.86  | 1.19E-01 | 4.69  | 2.72E-02 | EGA4-1 |
| ENSMMUG000000021192 | KIF21A  | Kinesin Family Member 21A                                   | 0.83  | 1.31  | 5.48  | 17.72 | 1.17  | 2.60E-01 | 1.31  | 1.89E-01 | 2.60  | 2.34E-02 | EGA4-1 |
| ENSMMUG000000023165 | GALNT6  | Polypeptide N-acetylgalactosaminyltransferase 6             | 0.11  | 0.42  | 0.80  | 4.12  | 0.48  | 7.82E-01 | 0.23  | 9.02E-01 | 4.82  | 5.13E-04 | EGA4-1 |
| ENSMMUG000000013232 | CD63    | CD63 Molecule                                               | 11.95 | 11.06 | 30.06 | 70.62 | 0.26  | 8.34E-01 | 0.95  | 3.31E-01 | 2.35  | 2.74E-02 | EGA4-1 |
| ENSMMUG000000021782 | LRP1    | LDL Receptor Related Protein 1                              | 2.06  | 1.82  | 1.45  | 8.76  | -0.16 | 9.17E-01 | -1.29 | 2.29E-01 | 3.36  | 2.82E-03 | EGA4-1 |
| ENSMMUG00000003180  | TBC1D30 | TBC1 Domain Family Member 30                                | 0.63  | 0.16  | 0.23  | 0.54  | -2.85 | 1.14E-01 | -1.96 | 3.18E-01 | 4.40  | 4.37E-02 | EGA4-1 |
| ENSMMUG000000020942 | LGR5    | Leucine Rich Repeat Containing G Protein-coupled Receptor 5 | 0.08  | 0.20  | 0.45  | 2.70  | -0.16 | 9.45E-01 | -2.06 | 2.29E-01 | 6.33  | 1.46E-04 | EGA4-1 |
| ENSMMUG000000042454 | PHLDA1  | Pleckstrin Homology Like Domain Family A Member 1           | 0.59  | 0.46  | 0.86  | 4.17  | 0.11  | 9.58E-01 | -0.88 | 5.87E-01 | 4.03  | 9.94E-03 | EGA4-1 |
| ENSMMUG000000006227 |         |                                                             | 0.40  | 0.22  | 1.44  | 22.68 | 0.25  | 8.98E-01 | 0.39  | 8.24E-01 | 5.47  | 3.39E-05 | EGA4-1 |
| ENSMMUG000000002235 | IGF1    | Insulin Like Growth Factor 1                                | 0.51  | 0.21  | 0.24  | 2.74  | -1.23 | 6.09E-01 | -2.72 | 2.07E-01 | 7.63  | 5.37E-04 | EGA4-1 |
| ENSMMUG000000020951 | NUAK1   | NUAK Family Kinase 1                                        | 0.14  | 0.25  | 0.36  | 1.47  | 1.77  | 4.39E-01 | -1.79 | 4.27E-01 | 5.30  | 2.70E-02 | EGA4-1 |
| ENSMMUG000000043781 | GLTP    | Glycolipid Transfer Protein                                 | 0.79  | 0.65  | 2.23  | 18.48 | -0.62 | 6.45E-01 | 2.09  | 5.11E-02 | 3.75  | 1.55E-03 | EGA4-1 |
| ENSMMUG000000020665 | SDSL    | Serine Dehydratase Like                                     | 0.07  | 0.02  | 0.09  | 1.74  | 2.08  | 4.21E-01 | 0.41  | 8.93E-01 | 6.76  | 5.27E-03 | EGA4-1 |
| ENSMMUG000000021232 | HSPB8   | Heat Shock Protein Family B (small) Member 8                | 0.05  | 0.01  | 0.41  | 6.35  | -0.87 | 6.24E-01 | -0.06 | 9.79E-01 | 9.77  | 8.97E-14 | EGA4-1 |
| ENSMMUG000000038046 |         |                                                             | 0.28  | 1.36  | 5.34  | 5.90  | 3.36  | 1.95E-01 | -1.33 | 6.32E-01 | 6.77  | 1.15E-02 | EGA4-1 |
| ENSMMUG000000039160 |         |                                                             | 0.88  | 0.42  | 0.20  | 2.44  | -1.63 | 5.45E-01 | -1.85 | 4.89E-01 | 8.29  | 1.07E-03 | EGA4-1 |
| ENSMMUG000000046971 | RAB18   | RAB18, Member RAS Oncogene Family                           | 13.28 | 6.63  | 6.96  | 10.94 | -1.00 | 2.20E-01 | -0.70 | 4.19E-01 | 1.96  | 3.62E-02 | EGA4-1 |

|                    |              |                                                                    |       |       |       |       |       |          |       |          |      |          |        |
|--------------------|--------------|--------------------------------------------------------------------|-------|-------|-------|-------|-------|----------|-------|----------|------|----------|--------|
| ENSMMUG0000000658  | CDHR1        | Cadherin Related Family Member 1                                   | 0.06  | 0.00  | 0.62  | 4.76  | -0.39 | 9.34E-01 | 3.87  | 2.25E-01 | 7.98 | 2.19E-02 | EGA4-1 |
| ENSMMUG00000021773 | FAM213A      | Family With Sequence Similarity 213 Member A                       | 3.27  | 3.61  | 5.52  | 21.07 | -1.06 | 4.20E-01 | 0.99  | 4.53E-01 | 4.10 | 1.07E-03 | EGA4-1 |
| ENSMMUG00000047584 | CHST3        | Carbohydrate Sulfotransferase 3                                    | 0.25  | 0.77  | 0.09  | 1.86  | 0.07  | 9.76E-01 | -2.79 | 7.08E-02 | 6.28 | 1.69E-04 | EGA4-1 |
| ENSMMUG00000012969 | PSAP         | Prosaposin                                                         | 21.99 | 14.12 | 22.86 | ##### | -0.65 | 4.12E-01 | 0.82  | 2.77E-01 | 1.75 | 4.23E-02 | EGA4-1 |
| ENSMMUG00000008789 | PCBD1        | Pterin-4 Alpha-carbinolamine Dehydratase 1                         | 1.30  | 0.31  | 1.02  | 6.41  | -1.16 | 7.05E-01 | 1.07  | 7.27E-01 | 5.82 | 4.81E-02 | EGA4-1 |
| ENSMMUG00000015314 | TSPAN15      | Tetraspanin 15                                                     | 0.57  | 0.08  | 0.99  | 22.30 | -1.39 | 3.93E-01 | -0.94 | 6.27E-01 | 7.92 | 4.04E-08 | EGA4-1 |
| ENSMMUG00000006411 | PAPSS2       | 3'-phosphoadenosine 5'-phosphosulfate Synthase 2                   | 3.73  | 6.22  | 0.78  | 1.14  | -1.88 | 2.36E-01 | -1.74 | 2.72E-01 | 3.83 | 3.26E-02 | EGA4-1 |
| ENSMMUG00000017204 | PDCD4        | Programmed Cell Death 4                                            | 8.94  | 3.67  | 3.37  | 21.84 | -0.76 | 5.26E-01 | -1.04 | 3.52E-01 | 3.05 | 8.75E-03 | EGA4-1 |
| ENSMMUG00000022799 | TCF7L2       | Transcription Factor 7 Like 2                                      | 2.59  | 11.21 | 5.32  | 17.15 | 1.71  | 1.10E-01 | -1.94 | 5.89E-02 | 2.85 | 2.12E-02 | EGA4-1 |
| ENSMMUG00000015215 | LHPP         | Phospholysine Phosphohistidine Inorganic Pyrophosphate Phosphatase | 2.07  | 2.98  | 0.99  | 1.96  | 1.40  | 4.49E-01 | -3.07 | 5.50E-02 | 4.44 | 2.29E-02 | EGA4-1 |
| ENSMMUG00000017483 | EPS8L2       | EPS8 Like 2                                                        | 0.01  | 0.03  | 0.08  | 1.22  | -0.46 | 8.65E-01 | 1.32  | 5.38E-01 | 6.34 | 2.04E-03 | EGA4-1 |
| ENSMMUG00000045775 | LOC700274    | Macrophage-expressed Gene 1 Protein                                | 10.67 | 10.89 | 14.90 | 81.83 | -0.75 | 5.99E-01 | 0.50  | 7.43E-01 | 3.79 | 3.76E-03 | EGA4-1 |
| ENSMMUG00000012620 | YPEL4        | Yippee Like 4                                                      | 0.64  | 0.02  | 0.01  | 1.01  | -3.93 | 1.04E-01 | -1.28 | 6.81E-01 | 7.70 | 4.64E-03 | EGA4-1 |
| ENSMMUG00000040957 |              |                                                                    | 2.12  | 3.44  | 2.47  | 9.38  | -1.39 | 4.87E-01 | 0.04  | 9.87E-01 | 4.86 | 1.55E-02 | EGA4-1 |
| ENSMMUG00000021448 |              |                                                                    | 16.82 | 11.86 | 16.24 | 79.87 | -2.24 | 1.48E-01 | 0.47  | 8.15E-01 | 5.22 | 1.20E-03 | EGA4-1 |
| ENSMMUG00000002611 | LARGE2       | LARGE Xylosyl- And Glucuronyltransferase 2                         | 0.07  | 0.03  | 0.34  | 6.48  | -0.30 | 9.17E-01 | -0.05 | 9.86E-01 | 8.11 | 2.50E-05 | EGA4-1 |
| ENSMMUG00000016807 |              |                                                                    | 4.24  | 2.07  | 1.40  | 4.78  | -1.32 | 4.63E-01 | -1.39 | 4.33E-01 | 3.86 | 4.80E-02 | EGA4-1 |
| ENSMMUG00000000336 | UEVLD        | UEV And Lactate/malate Dehydrogenase Domains                       | 1.03  | 4.16  | 3.37  | 8.45  | 1.65  | 1.52E-01 | 0.12  | 9.42E-01 | 2.69 | 4.84E-02 | EGA4-1 |
| ENSMMUG00000011990 | FAR1         | Fatty Acyl-CoA Reductase 1                                         | 0.98  | 1.66  | 0.77  | 3.03  | 1.11  | 2.71E-01 | -1.57 | 9.36E-02 | 2.45 | 2.94E-02 | EGA4-1 |
| ENSMMUG00000000338 | TRIM22       | Tripartite Motif Containing 22                                     | 0.05  | 0.02  | 0.14  | 1.06  | 0.69  | 8.03E-01 | -0.47 | 8.65E-01 | 8.00 | 1.32E-04 | EGA4-1 |
| ENSMMUG00000013490 | TRIM6        | Tripartite Motif Containing 6                                      | 3.03  | 1.41  | 1.74  | 5.85  | -0.71 | 5.60E-01 | -0.50 | 7.01E-01 | 2.50 | 4.95E-02 | EGA4-1 |
| ENSMMUG00000003139 | ARHGEF17     | Rho Guanine Nucleotide Exchange Factor 17                          | 0.62  | 0.51  | 0.15  | 0.96  | -0.60 | 7.66E-01 | -2.34 | 1.36E-01 | 3.80 | 4.53E-02 | EGA4-1 |
| ENSMMUG00000013093 | LOC106993385 | Uncharacterized LOC106993385                                       | 0.48  | 0.26  | 4.27  | 1.35  | -1.30 | 5.12E-01 | 1.02  | 6.21E-01 | 4.28 | 4.63E-02 | EGA4-1 |
| ENSMMUG00000009126 | SLCO2B1      | Solute Carrier Organic Anion Transporter Family Member 2B1         | 0.00  | 0.07  | 3.89  | 10.69 | 0.75  | 8.24E-01 | 3.91  | 9.36E-02 | 5.62 | 4.58E-02 | EGA4-1 |
| ENSMMUG00000018944 | AQP11        | Aquaporin 11                                                       | 1.29  | 0.73  | 0.69  | 7.06  | -2.51 | 1.34E-01 | 1.76  | 3.29E-01 | 4.21 | 3.57E-02 | EGA4-1 |
| ENSMMUG00000004048 | FZD4         | Frizzled Class Receptor 4                                          | 12.59 | 10.19 | 19.66 | 27.45 | -0.46 | 6.76E-01 | -1.00 | 2.85E-01 | 2.48 | 1.45E-02 | EGA4-1 |
| ENSMMUG00000010229 | TMEM135      | Transmembrane Protein 135                                          | 3.57  | 3.09  | 5.54  | 10.91 | -0.36 | 8.39E-01 | -1.76 | 1.76E-01 | 3.75 | 9.79E-03 | EGA4-1 |
| ENSMMUG00000021628 | CADM1        | Cell Adhesion Molecule 1                                           | 11.28 | 11.00 | 22.98 | ##### | -0.36 | 7.65E-01 | 0.88  | 3.88E-01 | 2.26 | 4.72E-02 | EGA4-1 |
| ENSMMUG00000044545 | APOA1        | Apolipoprotein A1                                                  | 0.73  | 0.24  | 3.95  | 67.69 | -0.21 | 9.28E-01 | -0.13 | 9.56E-01 | 9.51 | 1.95E-10 | EGA4-1 |
| ENSMMUG00000002061 | PCSK7        | Proprotein Convertase Subtilisin/kexin Type 7                      | 1.08  | 0.83  | 1.16  | 4.62  | -1.17 | 4.33E-01 | 0.35  | 8.43E-01 | 3.23 | 4.54E-02 | EGA4-1 |
| ENSMMUG00000009318 | BCL9L        | B-cell CLL/lymphoma 9 Like                                         | 0.45  | 0.46  | 0.93  | 6.57  | -1.78 | 1.48E-01 | 0.63  | 6.69E-01 | 5.51 | 3.33E-06 | EGA4-1 |
| ENSMMUG00000016890 | SLC37A4      | Solute Carrier Family 37 Member 4                                  | 0.21  | 1.96  | 2.04  | 3.61  | 0.91  | 6.34E-01 | 0.94  | 6.13E-01 | 4.56 | 1.00E-02 | EGA4-1 |
| ENSMMUG00000041104 | GLB1L2       | Galactosidase Beta 1 Like 2                                        | 0.16  | 0.09  | 0.36  | 0.81  | -1.27 | 4.65E-01 | 0.02  | 9.95E-01 | 4.88 | 4.17E-03 | EGA4-1 |
| ENSMMUG00000014921 | MBD5         | Methyl-CpG Binding Domain Protein 5                                | 0.22  | 0.34  | 0.57  | 1.55  | -0.92 | 6.50E-01 | 2.46  | 1.39E-01 | 4.27 | 2.81E-02 | EGA4-1 |
| ENSMMUG00000017929 | DNPEP        | Aspartyl Aminopeptidase                                            | 0.52  | 1.66  | 1.01  | 2.24  | 0.02  | 9.87E-01 | -0.26 | 8.35E-01 | 2.80 | 6.44E-03 | EGA4-1 |
| ENSMMUG00000038522 |              |                                                                    | 0.15  | 0.56  | 4.44  | 22.06 | 1.55  | 5.44E-01 | 1.54  | 5.20E-01 | 7.57 | 1.07E-03 | EGA4-1 |
| ENSMMUG00000011777 | B3GNT7       | UDP-GlcNAc:betaGal Beta-1,3-N-acetylglucosaminyltransferase 7      | 0.04  | 0.16  | 0.72  | 5.03  | 0.93  | 7.40E-01 | -0.08 | 9.80E-01 | 6.08 | 1.11E-02 | EGA4-1 |
| ENSMMUG00000019604 | ENTPD8       | Ectonucleoside Triphosphate Diphosphohydrolase 8                   | 0.01  | 0.01  | 0.04  | 0.88  | 1.21  | 7.05E-01 | -0.64 | 8.48E-01 | 8.15 | 1.90E-03 | EGA4-1 |
| ENSMMUG00000021432 | PAXX         | PAXX, Non-homologous End Joining Factor                            | 0.58  | 0.26  | 0.84  | 2.39  | -1.73 | 5.30E-01 | 1.37  | 6.32E-01 | 6.01 | 3.89E-02 | EGA4-1 |
| ENSMMUG00000001522 | ASS1         | Argininosuccinate Synthase 1                                       | 3.23  | 1.09  | 2.09  | 11.77 | -2.05 | 1.42E-01 | -2.21 | 1.14E-01 | 4.41 | 3.44E-03 | EGA4-1 |
| ENSMMUG00000011822 | PTGES        | Prostaglandin E Synthase                                           | 1.65  | 1.27  | 0.23  | 0.40  | -2.58 | 1.37E-01 | -3.26 | 5.56E-02 | 4.58 | 2.36E-02 | EGA4-1 |
| ENSMMUG00000002515 | PTPA         | Protein Phosphatase 2 Phosphatase Activator                        | 0.14  | 0.47  | 1.81  | 2.70  | 0.92  | 6.02E-01 | 2.69  | 5.55E-02 | 3.89 | 2.22E-02 | EGA4-1 |
| ENSMMUG00000010143 | PKN3         | Protein Kinase N3                                                  | 0.21  | 2.01  | 0.86  | 0.85  | 0.42  | 8.65E-01 | -3.01 | 8.32E-02 | 5.38 | 5.46E-03 | EGA4-1 |
| ENSMMUG00000007354 | NEK6         | NIMA Related Kinase 6                                              | 0.21  | 0.10  | 1.33  | 5.61  | -1.83 | 1.98E-01 | 2.44  | 6.23E-02 | 4.99 | 2.42E-04 | EGA4-1 |
| ENSMMUG00000045217 |              |                                                                    | 0.69  | 4.96  | 3.22  | 9.40  | 0.92  | 7.20E-01 | 0.42  | 8.77E-01 | 7.11 | 1.19E-03 | EGA4-1 |

|                    |              |                                                               |       |       |       |       |       |          |       |          |       |          |        |
|--------------------|--------------|---------------------------------------------------------------|-------|-------|-------|-------|-------|----------|-------|----------|-------|----------|--------|
| ENSMMUG00000021526 | UGCG         | UDP-glucose Ceramide<br>Glucosyltransferase                   | 3.71  | 2.20  | 2.46  | 18.00 | -1.49 | 2.37E-01 | -1.32 | 3.17E-01 | 4.16  | 1.53E-03 | EGA4-1 |
| ENSMMUG00000012749 | PTGR1        | Prostaglandin Reductase 1                                     | 0.50  | 1.00  | 3.31  | 19.82 | 1.58  | 3.36E-01 | 0.44  | 8.26E-01 | 4.13  | 1.69E-02 | EGA4-1 |
| ENSMMUG00000020607 | LOC712487    | Protein NipSnap Homolog 3B                                    | 0.21  | 0.12  | 0.17  | 1.97  | -1.25 | 3.99E-01 | 0.97  | 5.28E-01 | 4.16  | 5.51E-03 | EGA4-1 |
| ENSMMUG00000020780 | CNTFR        | Ciliary Neurotrophic Factor<br>Receptor                       | 0.01  | 0.10  | 0.74  | 1.68  | 1.76  | 3.57E-01 | 1.85  | 2.76E-01 | 4.32  | 2.30E-02 | EGA4-1 |
| ENSMMUG00000031755 | GLDC         | Glycine Decarboxylase                                         | 12.79 | 4.98  | 3.27  | 11.54 | -1.03 | 3.18E-01 | -0.85 | 4.14E-01 | 2.29  | 4.67E-02 | EGA4-1 |
| ENSMMUG00000012235 | CD274        | CD274 Molecule                                                | 0.16  | 0.25  | 0.20  | 0.84  | -0.63 | 8.76E-01 | -1.38 | 7.03E-01 | 7.01  | 4.16E-02 | EGA4-1 |
| ENSMMUG00000046467 |              |                                                               | 0.02  | 0.14  | 0.18  | 5.05  | 2.79  | 2.05E-01 | -0.43 | 8.77E-01 | 5.72  | 1.31E-02 | EGA4-1 |
| ENSMMUG00000007996 | ZNF367       | Zinc Finger Protein 367                                       | 0.10  | 0.26  | 0.38  | 1.74  | 1.77  | 3.42E-01 | -0.84 | 6.95E-01 | 4.39  | 3.50E-02 | EGA4-1 |
| ENSMMUG00000023437 | DDX1         | DEAD-box Helicase 1                                           | 34.20 | 33.11 | 27.16 | 41.79 | -0.14 | 8.48E-01 | -0.53 | 3.67E-01 | 1.55  | 1.26E-02 | EGA4-1 |
| ENSMMUG00000030909 |              |                                                               | 0.23  | 0.28  | 0.50  | 1.84  | -0.94 | 5.77E-01 | -0.46 | 8.13E-01 | 3.94  | 1.77E-02 | EGA4-1 |
| ENSMMUG00000013565 | DNMT3A       | DNA Methyltransferase 3 Alpha                                 | 22.01 | 15.85 | 11.81 | 41.37 | -0.71 | 4.40E-01 | -1.16 | 1.61E-01 | 2.04  | 3.69E-02 | EGA4-1 |
| ENSMMUG00000016442 | QPCT         | Glutaminyl-peptide<br>Cyclotransferase                        | 0.00  | 0.02  | 0.36  | 1.03  | 3.37  | 1.92E-01 | -0.45 | 8.88E-01 | 6.04  | 2.57E-02 | EGA4-1 |
| ENSMMUG00000046512 | EXOC6B       | Exocyst Complex Component 6B                                  | 1.57  | 0.42  | 1.08  | 3.87  | -1.93 | 6.11E-02 | 0.43  | 7.45E-01 | 4.01  | 2.51E-04 | EGA4-1 |
| ENSMMUG0000002721  | RTKN         | Rhotekin                                                      | 0.08  | 0.12  | 1.59  | 6.10  | 1.46  | 4.90E-01 | 2.51  | 1.51E-01 | 7.11  | 5.59E-05 | EGA4-1 |
| ENSMMUG0000002675  | CAPG         | Capping Actin Protein, Gelsolin<br>Like                       | 0.11  | 0.15  | 1.61  | 8.29  | -0.46 | 8.64E-01 | 2.80  | 1.19E-01 | 5.09  | 1.07E-02 | EGA4-1 |
| ENSMMUG00000041136 | LOC100431008 | Lysine-rich Coiled-coil Protein 1                             | 1.24  | 1.62  | 0.45  | 1.21  | -1.96 | 2.20E-01 | -2.34 | 1.26E-01 | 4.71  | 5.74E-03 | EGA4-1 |
| ENSMMUG00000020737 | IL1R1        | Interleukin 1 Receptor Type 1                                 | 0.20  | 1.24  | 0.49  | 1.43  | 2.47  | 1.85E-01 | -3.36 | 6.28E-02 | 4.92  | 2.54E-02 | EGA4-1 |
| ENSMMUG00000000481 | TMTC4        | Transmembrane And<br>Tetratricopeptide Repeat<br>Containing 4 | 0.21  | 0.19  | 0.52  | 3.53  | -1.70 | 1.13E-01 | 1.74  | 9.78E-02 | 4.59  | 1.29E-05 | EGA4-1 |
| ENSMMUG00000012666 | CARS2        | CysteinyI-tRNA Synthetase 2,<br>Mitochondrial                 | 0.87  | 2.24  | 0.88  | 2.66  | 0.97  | 5.42E-01 | -1.68 | 2.39E-01 | 3.43  | 3.84E-02 | EGA4-1 |
| ENSMMUG00000027225 |              |                                                               | 0.29  | 2.20  | 0.17  | 3.21  | -1.60 | 8.26E-01 | -3.15 | 6.19E-01 | ##### | 7.13E-09 | EGA4-1 |
| ENSMMUG00000009231 | NKAIN4       | Sodium/potassium Transporting<br>ATPase Interacting 4         | 0.00  | 0.00  | 0.24  | 4.03  | 1.24  | 6.84E-01 | 3.10  | 1.85E-01 | 6.84  | 5.78E-03 | EGA4-1 |
| ENSMMUG00000010266 | LOC694289    | Guanine Nucleotide-binding<br>Protein G(s) Subunit Alpha      | 9.37  | 11.95 | 19.42 | 42.57 | 0.36  | 4.69E-01 | 0.51  | 2.75E-01 | 1.21  | 1.67E-02 | EGA4-1 |
| ENSMMUG00000009960 | CTSA         | Cathepsin A                                                   | 2.97  | 3.23  | 11.96 | 26.14 | -0.47 | 7.55E-01 | 1.49  | 2.14E-01 | 3.29  | 1.34E-02 | EGA4-1 |
| ENSMMUG00000003409 |              |                                                               | 0.24  | 0.34  | 0.09  | 0.90  | 0.59  | 8.55E-01 | -3.67 | 1.25E-01 | 6.47  | 2.43E-02 | EGA4-1 |
| ENSMMUG00000041652 | MYL9         | Myosin Light Chain 9                                          | 0.44  | 2.03  | 1.70  | 5.03  | 2.43  | 6.55E-02 | 0.10  | 9.60E-01 | 3.84  | 1.11E-02 | EGA4-1 |
| ENSMMUG00000019474 | DNMT3B       | DNA Methyltransferase 3 Beta                                  | 33.72 | 28.56 | 30.00 | ##### | -0.74 | 4.65E-01 | -0.01 | 9.92E-01 | 2.62  | 9.28E-03 | EGA4-1 |
| ENSMMUG00000022721 | COMM7        | COMM Domain Containing 7                                      | 1.65  | 1.24  | 1.10  | 4.18  | -1.10 | 1.99E-01 | 0.26  | 8.11E-01 | 2.25  | 1.86E-02 | EGA4-1 |
| ENSMMUG00000019849 | BMP2         | Bone Morphogenetic Protein 2                                  | 0.05  | 0.11  | 0.12  | 0.78  | 0.91  | 6.60E-01 | -2.01 | 2.78E-01 | 4.83  | 1.53E-02 | EGA4-1 |
| ENSMMUG00000038402 |              |                                                               | 0.17  | 1.15  | 0.21  | 0.91  | 0.94  | 6.91E-01 | -1.73 | 4.03E-01 | 5.25  | 1.64E-02 | EGA4-1 |
| ENSMMUG00000023053 | GSTT2        | Glutathione S-transferase Theta 2                             | 0.80  | 0.10  | 0.82  | 3.74  | -2.99 | 1.28E-01 | -0.93 | 7.14E-01 | 6.10  | 3.81E-03 | EGA4-1 |
| ENSMMUG00000023450 | TPST2        | Tyrosylprotein Sulfotransferase 2                             | 0.40  | 0.98  | 3.15  | 4.13  | -0.76 | 6.88E-01 | 1.71  | 2.86E-01 | 3.70  | 4.24E-02 | EGA4-1 |
| ENSMMUG00000004675 | SMTN         | Smoothelin                                                    | 1.18  | 0.88  | 0.29  | 1.37  | -2.19 | 2.62E-01 | -3.08 | 9.12E-02 | 6.44  | 1.18E-03 | EGA4-1 |
| ENSMMUG00000006734 | TIMP3        | TIMP Metalloproteinase Inhibitor 3                            | 0.36  | 0.24  | 0.21  | 1.13  | 1.07  | 5.92E-01 | -1.16 | 5.53E-01 | 4.71  | 1.52E-02 | EGA4-1 |
| ENSMMUG00000014101 | HDAC10       | Histone Deacetylase 10                                        | 0.13  | 0.39  | 1.36  | 1.35  | -0.09 | 9.71E-01 | -0.70 | 7.63E-01 | 5.48  | 7.07E-03 | EGA4-1 |
| ENSMMUG00000003042 | VPS53        | VPS53, GARP Complex Subunit                                   | 4.25  | 7.13  | 4.22  | 5.36  | 0.63  | 3.06E-01 | -0.99 | 7.65E-02 | 1.56  | 1.90E-02 | EGA4-1 |
| ENSMMUG00000002765 | SLC25A11     | Solute Carrier Family 25 Member<br>11                         | 1.96  | 3.04  | 5.35  | 7.55  | -1.60 | 3.46E-01 | 1.07  | 5.48E-01 | 3.77  | 4.30E-02 | EGA4-1 |
| ENSMMUG00000009597 | SLC13A5      | Solute Carrier Family 13 Member 5                             | 0.77  | 0.05  | 2.02  | 5.41  | -2.86 | 1.76E-01 | -1.67 | 5.00E-01 | 5.43  | 1.91E-02 | EGA4-1 |
| ENSMMUG00000019148 | VTN          | Vitronectin                                                   | 0.21  | 0.51  | 0.07  | 0.35  | -0.93 | 7.10E-01 | -2.63 | 2.13E-01 | 5.43  | 2.68E-02 | EGA4-1 |
| ENSMMUG00000007004 | RNF43        | Ring Finger Protein 43                                        | 0.01  | 0.13  | 0.22  | 1.69  | 3.05  | 1.50E-01 | 2.32  | 2.41E-01 | 5.92  | 3.91E-03 | EGA4-1 |
| ENSMMUG00000006066 | PCTP         | Phosphatidylcholine Transfer<br>Protein                       | 1.24  | 0.20  | 0.11  | 0.66  | -2.47 | 7.50E-02 | -2.72 | 5.76E-02 | 4.67  | 4.31E-03 | EGA4-1 |
| ENSMMUG00000000622 | MRM1         | Mitochondrial RRNA<br>Methyltransferase 1                     | 0.32  | 2.27  | 0.73  | 2.77  | 3.01  | 1.27E-01 | -3.34 | 7.99E-02 | 6.54  | 2.93E-03 | EGA4-1 |
| ENSMMUG00000003431 | HNF1B        | HNF1 Homeobox B                                               | 0.02  | 0.01  | 1.24  | 6.80  | -1.74 | 4.88E-01 | 1.93  | 4.39E-01 | 7.21  | 9.26E-04 | EGA4-1 |
| ENSMMUG00000018653 | LOC707129    | Keratin, Type I Cytoskeletal 19                               | 0.76  | 0.77  | 2.32  | 44.12 | 0.97  | 5.60E-01 | -0.48 | 7.95E-01 | 6.39  | 1.97E-06 | EGA4-1 |
| ENSMMUG00000009884 | HSD17B1      | Hydroxysteroid 17-beta<br>Dehydrogenase 1                     | 1.19  | 0.34  | 0.70  | 10.85 | -0.20 | 9.41E-01 | -2.25 | 2.54E-01 | 7.77  | 5.09E-05 | EGA4-1 |
| ENSMMUG00000023751 | GRN          | Granulin Precursor                                            | 7.79  | 6.22  | 5.04  | 15.14 | -0.55 | 7.14E-01 | -1.27 | 3.19E-01 | 2.92  | 4.16E-02 | EGA4-1 |
| ENSMMUG00000014195 | SLC39A11     | Solute Carrier Family 39 Member<br>11                         | 0.92  | 0.92  | 0.51  | 4.85  | -1.85 | 2.86E-01 | -0.32 | 8.86E-01 | 4.00  | 4.23E-02 | EGA4-1 |
| ENSMMUG00000019221 | HEXDC        | Hexosaminidase D                                              | 0.35  | 1.19  | 0.81  | 1.17  | 0.84  | 6.66E-01 | -1.32 | 4.52E-01 | 4.82  | 8.52E-03 | EGA4-1 |

|                     |           |                                                                   |       |       |        |       |       |          |        |          |       |          |        |
|---------------------|-----------|-------------------------------------------------------------------|-------|-------|--------|-------|-------|----------|--------|----------|-------|----------|--------|
| ENSMMUG0000006455   | NARFL     | Nuclear Prelamin A Recognition Factor Like                        | 0.19  | 3.76  | 3.17   | 3.57  | 1.91  | 1.58E-01 | 0.96   | 5.12E-01 | 3.67  | 1.35E-02 | EGA4-1 |
| ENSMMUG0000000044   | IFT140    | Intraflagellar Transport 140                                      | 0.49  | 0.75  | 0.50   | 1.04  | 0.58  | 6.76E-01 | -1.66  | 1.41E-01 | 3.17  | 1.58E-02 | EGA4-1 |
| ENSMMUG00000019095  | AMDHD2    | Amidohydrolase Domain Containing 2                                | 0.52  | 3.10  | 1.17   | 2.50  | 2.84  | 1.21E-01 | -0.70  | 7.49E-01 | 5.19  | 1.05E-02 | EGA4-1 |
| ENSMMUG00000029123  |           |                                                                   | 5.66  | 8.00  | 38.98  | ##### | -0.63 | 6.06E-01 | 1.71   | 8.67E-02 | 3.45  | 1.48E-03 | EGA4-1 |
| ENSMMUG00000043572  |           |                                                                   | 0.03  | 0.25  | 0.91   | 7.68  | 2.86  | 3.21E-01 | -0.47  | 8.90E-01 | 7.36  | 7.31E-03 | EGA4-1 |
| ENSMMUG00000010377  |           |                                                                   | 0.56  | 0.36  | 6.10   | 17.38 | -1.36 | 6.12E-01 | 0.96   | 7.31E-01 | 6.75  | 4.77E-03 | EGA4-1 |
| ENSMMUG00000010370  |           |                                                                   | 18.74 | 6.49  | 21.12  | ##### | -2.28 | 5.14E-02 | -0.77  | 5.93E-01 | 5.72  | 1.18E-06 | EGA4-1 |
| ENSMMUG00000016245  | ZNRF1     | Zinc And Ring Finger 1                                            | 0.72  | 0.93  | 1.09   | 1.69  | -2.42 | 1.91E-01 | 0.64   | 7.85E-01 | 4.33  | 4.78E-02 | EGA4-1 |
| ENSMMUG00000003662  | PKD1L2    | Polycystin 1 Like 2                                               | 0.19  | 0.05  | 0.28   | 9.05  | -1.96 | 2.20E-01 | 0.04   | 9.87E-01 | 7.82  | 1.34E-07 | EGA4-1 |
| ENSMMUG00000018961  | TLDC1     | TBC/LysM-associated Domain Containing 1                           | 0.17  | 0.16  | 0.57   | 12.10 | 0.00  | 9.99E-01 | -1.42  | 3.76E-01 | 8.36  | 6.05E-10 | EGA4-1 |
| ENSMMUG00000011408  | LAMA1     | Laminin Subunit Alpha 1                                           | 0.87  | 1.18  | 6.34   | 60.88 | 0.25  | 8.69E-01 | 1.23   | 2.68E-01 | 4.19  | 1.11E-04 | EGA4-1 |
| ENSMMUG00000004663  | COLEC12   | Collectin Subfamily Member 12                                     | 0.53  | 0.59  | 2.79   | 17.97 | 0.60  | 6.92E-01 | -1.85  | 1.31E-01 | 5.93  | 5.22E-07 | EGA4-1 |
| ENSMMUG00000023717  | MIER2     | MIER Family Member 2                                              | 0.48  | 0.88  | 0.92   | 1.28  | -0.85 | 6.81E-01 | -1.51  | 4.11E-01 | 6.19  | 7.30E-04 | EGA4-1 |
| ENSMMUG00000003045  | NDUFS7    | NADH:ubiquinone Oxidoreductase Core Subunit S7                    | 0.73  | 2.13  | 1.27   | 5.69  | -0.11 | 9.59E-01 | -0.85  | 6.17E-01 | 4.89  | 1.48E-03 | EGA4-1 |
| ENSMMUG00000028926  | LOC721854 | MPN Domain-containing Protein                                     | 0.61  | 1.00  | 0.29   | 1.23  | 0.01  | 9.98E-01 | -1.93  | 3.08E-01 | 5.50  | 7.02E-03 | EGA4-1 |
| ENSMMUG00000005218  | KEAP1     | Kelch Like ECH Associated Protein 1                               | 0.70  | 2.86  | 0.46   | 2.54  | 0.27  | 8.95E-01 | -1.18  | 4.50E-01 | 3.64  | 2.96E-02 | EGA4-1 |
| ENSMMUG00000003744  | SLC44A2   | Solute Carrier Family 44 Member 2                                 | 1.27  | 1.58  | 3.61   | 26.30 | -1.40 | 2.74E-01 | 0.25   | 8.80E-01 | 3.22  | 2.06E-02 | EGA4-1 |
| ENSMMUG00000018068  | MRI1      | Methylthioribose-1-phosphate Isomerase 1                          | 0.91  | 1.10  | 2.55   | 4.16  | -1.89 | 2.49E-01 | 1.38   | 4.15E-01 | 3.91  | 3.08E-02 | EGA4-1 |
| ENSMMUG00000028849  | NR2F6     | Nuclear Receptor Subfamily 2 Group F Member 6                     | 0.04  | 0.27  | 0.65   | 3.14  | 3.16  | 1.14E-01 | -0.66  | 7.85E-01 | 4.82  | 2.70E-02 | EGA4-1 |
| ENSMMUG00000021182  |           |                                                                   | 0.37  | 0.39  | 0.21   | 0.88  | -2.34 | 2.69E-01 | -0.73  | 7.83E-01 | 4.98  | 3.79E-02 | EGA4-1 |
| ENSMMUG00000006128  |           |                                                                   | 1.28  | 1.13  | 3.85   | 20.42 | -0.75 | 5.54E-01 | 1.11   | 3.41E-01 | 2.78  | 2.95E-02 | EGA4-1 |
| ENSMMUG00000003527  | LGALS13   | Galectin 13                                                       | 0.05  | 0.59  | 0.21   | 0.97  | 2.98  | 3.38E-01 | -2.42  | 4.29E-01 | 8.15  | 8.57E-03 | EGA4-1 |
| ENSMMUG00000012172  | PAFAH1B3  | Platelet Activating Factor Acetylhydrolase 1b Catalytic Subunit 3 | 4.15  | 5.91  | 3.53   | 12.98 | 0.16  | 9.39E-01 | -2.65  | 5.79E-02 | 3.65  | 3.23E-02 | EGA4-1 |
| ENSMMUG00000042610  |           |                                                                   | 0.51  | 2.35  | 0.24   | 0.34  | -2.04 | 5.21E-01 | -2.68  | 3.64E-01 | 8.81  | 4.64E-03 | EGA4-1 |
| ENSMMUG00000017498  | ZNF444    | Zinc Finger Protein 444                                           | 0.27  | 0.56  | 0.90   | 0.79  | -0.65 | 7.04E-01 | -0.96  | 5.61E-01 | 4.11  | 1.74E-02 | EGA4-1 |
| ENSMMUG00000038331  | RPS4Y1    | Ribosomal Protein S4, Y-linked 1                                  | 0.03  | 7.22  | 19.54  | 44.85 | 2.17  | 3.90E-01 | 2.42   | 3.11E-01 | 6.69  | 7.61E-03 | EGA4-1 |
| ENSMMUG00000045017  | KDM5D     | Lysine Demethylase 5D                                             | 0.00  | 0.23  | 0.17   | 1.19  | 4.12  | 7.04E-02 | 0.35   | 9.05E-01 | 6.34  | 1.05E-02 | EGA4-1 |
| ENSMMUG00000008222  |           |                                                                   | ##### | ##### | 181.24 | ##### | -0.72 | 1.60E-01 | 0.33   | 5.70E-01 | 1.52  | 6.07E-03 | EGA4-1 |
| ENSMMUG00000042754  |           |                                                                   | 0.93  | 1.39  | 0.25   | 1.23  | -2.78 | 1.07E-01 | -1.57  | 4.17E-01 | 5.39  | 8.61E-03 | EGA4-1 |
| ENSMMUG00000012359  |           |                                                                   | 0.05  | 0.01  | 0.40   | 4.99  | 0.60  | 8.23E-01 | 1.02   | 6.66E-01 | 5.34  | 1.15E-02 | EGA4-1 |
| ENSMMUG00000038607  |           |                                                                   | 0.20  | 0.57  | 0.88   | 4.59  | 1.30  | 4.19E-01 | 0.01   | 9.96E-01 | 3.70  | 2.59E-02 | EGA4-1 |
| ENSMMUG000000045890 |           |                                                                   | 3.01  | 0.81  | 0.53   | 2.23  | -2.99 | 6.01E-02 | -2.06  | 2.46E-01 | 4.64  | 1.55E-02 | EGA4-1 |
| ENSMMUG00000048703  |           |                                                                   | 0.80  | 3.21  | 0.41   | 2.00  | -1.82 | 4.90E-01 | -4.25  | 6.25E-02 | 7.25  | 5.01E-03 | EGA4-1 |
| ENSMMUG00000038138  |           |                                                                   | 2.86  | 4.26  | 1.51   | 10.85 | -2.22 | 2.77E-01 | -2.11  | 3.12E-01 | 7.82  | 5.96E-05 | EGA4-1 |
| ENSMMUG00000045971  |           |                                                                   | 0.81  | 4.21  | 5.86   | 9.36  | -0.94 | 6.66E-01 | 1.66   | 3.81E-01 | 4.84  | 1.50E-02 | EGA4-1 |
| ENSMMUG00000048003  |           |                                                                   | 0.86  | 1.36  | 0.27   | 1.34  | -3.04 | 1.48E-01 | -2.42  | 2.77E-01 | 7.85  | 6.51E-04 | EGA4-1 |
| ENSMMUG00000019020  | SLC2A7    | Solute Carrier Family 2 Member 7                                  | 0.86  | 0.77  | 0.05   | 0.04  | -0.15 | 9.72E-01 | -28.06 | 1.74E-29 | ##### | 1.71E-13 | EGA4-2 |
| ENSMMUG00000023668  | FBXO6     | F-box Protein 6                                                   | 4.03  | 10.47 | 5.67   | 6.09  | 2.41  | 7.41E-02 | -5.17  | 3.35E-05 | 3.32  | 4.88E-02 | EGA4-2 |
| ENSMMUG00000032243  | FBLIM1    | Filamin Binding LIM Protein 1                                     | 0.83  | 1.14  | 0.04   | 0.93  | 0.35  | 8.66E-01 | -6.93  | 7.25E-07 | 5.86  | 3.96E-04 | EGA4-2 |
| ENSMMUG00000032238  | PADI4     | Peptidyl Arginine Deiminase 4                                     | 1.37  | 2.48  | 0.12   | 0.72  | 1.00  | 5.14E-01 | -6.21  | 4.42E-07 | 3.61  | 2.50E-02 | EGA4-2 |
| ENSMMUG00000002217  | ALPL      | Alkaline Phosphatase, Liver/bone/kidney                           | 0.57  | 1.88  | 0.78   | 2.44  | 0.59  | 7.80E-01 | -5.18  | 8.32E-04 | 7.20  | 3.39E-05 | EGA4-2 |
| ENSMMUG00000019592  |           |                                                                   | 2.39  | 5.78  | 0.82   | 5.06  | -0.45 | 8.67E-01 | -4.20  | 2.17E-02 | 5.43  | 1.45E-02 | EGA4-2 |
| ENSMMUG00000023231  | ANXA9     | Annexin A9                                                        | 4.00  | 2.00  | 0.09   | 1.73  | -0.90 | 5.95E-01 | -5.72  | 3.13E-05 | 4.23  | 1.50E-02 | EGA4-2 |
| ENSMMUG00000011142  | CAPN2     | Calpain 2                                                         | 2.05  | 2.15  | 0.48   | 4.31  | -1.12 | 5.33E-01 | -4.91  | 6.69E-04 | 8.43  | 4.12E-08 | EGA4-2 |
| ENSMMUG00000021116  | ATP2B4    | ATPase Plasma Membrane Ca2+ Transporting 4                        | 1.71  | 6.00  | 2.28   | 28.26 | 0.44  | 8.29E-01 | -3.47  | 1.29E-02 | 7.13  | 1.02E-06 | EGA4-2 |
| ENSMMUG00000004001  | SYT2      | Synaptotagmin 2                                                   | 5.31  | 1.32  | 0.29   | 2.28  | -2.43 | 1.15E-01 | -3.05  | 4.37E-02 | 5.74  | 7.05E-04 | EGA4-2 |
| ENSMMUG00000013507  | LAD1      | Ladinin 1                                                         | 38.84 | 16.94 | 2.82   | 7.58  | -1.22 | 2.15E-01 | -4.38  | 1.04E-07 | 2.72  | 1.08E-02 | EGA4-2 |
| ENSMMUG00000021649  | NEK7      | NIMA Related Kinase 7                                             | 11.14 | 9.05  | 5.91   | 12.02 | -0.07 | 9.45E-01 | -1.41  | 2.92E-02 | 2.05  | 7.55E-03 | EGA4-2 |
| ENSMMUG00000001943  | GRAMD1C   | GRAM Domain Containing 1C                                         | 0.17  | 0.15  | 0.33   | 1.01  | -0.35 | 8.86E-01 | -4.36  | 1.27E-02 | 4.94  | 1.59E-02 | EGA4-2 |
| ENSMMUG00000012579  | LSAMP     | Limbic System-associated Membrane Protein                         | 0.24  | 0.87  | 0.14   | 3.10  | 1.33  | 5.12E-01 | -4.99  | 5.56E-03 | 7.27  | 1.76E-04 | EGA4-2 |
| ENSMMUG00000000907  | MAATS1    | MYCBP Associated And Testis Expressed 1                           | 0.82  | 1.40  | 1.48   | 1.15  | -1.97 | 1.94E-01 | -5.16  | 8.38E-04 | 4.20  | 2.52E-02 | EGA4-2 |

|                    |           |                                                                       |       |       |        |       |       |          |        |          |       |          |        |
|--------------------|-----------|-----------------------------------------------------------------------|-------|-------|--------|-------|-------|----------|--------|----------|-------|----------|--------|
| ENSMMUG0000001529  | SLC25A26  | Solute Carrier Family 25 Member 26                                    | 7.71  | 4.95  | 2.18   | 4.35  | -0.53 | 4.95E-01 | -1.81  | 4.70E-03 | 2.30  | 2.47E-03 | EGA4-2 |
| ENSMMUG00000022262 | TNIK      | TRAF2 And NCK Interacting Kinase                                      | 7.81  | 5.86  | 0.44   | 4.61  | -0.05 | 9.73E-01 | -6.39  | 1.99E-11 | 5.34  | 6.68E-07 | EGA4-2 |
| ENSMMUG00000021893 |           |                                                                       | 3.08  | 6.95  | 3.59   | 12.01 | 0.53  | 7.82E-01 | -3.02  | 2.92E-02 | 3.89  | 2.24E-02 | EGA4-2 |
| ENSMMUG00000040908 |           |                                                                       | 6.77  | 1.79  | 0.01   | 0.04  | -1.85 | 5.96E-01 | -22.25 | 1.96E-17 | ##### | 1.90E-06 | EGA4-2 |
| ENSMMUG00000040631 | COL6A6    | Collagen Type VI Alpha 6 Chain                                        | 13.97 | 8.75  | 2.02   | 9.29  | 0.13  | 9.12E-01 | -4.28  | 1.48E-09 | 4.76  | 6.04E-10 | EGA4-2 |
| ENSMMUG0000006661  | SH3BP5    | SH3 Domain Binding Protein 5                                          | 19.83 | 4.67  | 2.70   | 23.21 | -1.98 | 5.20E-02 | -2.77  | 4.09E-03 | 5.07  | 7.19E-07 | EGA4-2 |
| ENSMMUG00000016823 | LOC709317 | Lipoma-preferred Partner                                              | 15.82 | 21.65 | 11.27  | 17.60 | 0.68  | 4.17E-01 | -2.40  | 4.17E-04 | 1.89  | 3.70E-02 | EGA4-2 |
| ENSMMUG00000032306 | LOC722333 | Lateral Signaling Target Protein 2 Homolog                            | 0.92  | 0.30  | 0.00   | 0.07  | -4.12 | 2.24E-01 | -21.08 | 3.08E-13 | ##### | 4.48E-10 | EGA4-2 |
| ENSMMUG00000018628 | TEC       | Tec Protein Tyrosine Kinase                                           | 0.17  | 0.86  | 0.16   | 1.58  | 0.99  | 5.90E-01 | -4.40  | 2.69E-03 | 7.66  | 5.18E-07 | EGA4-2 |
| ENSMMUG00000013106 | GALNT7    | Polypeptide N-acetylgalactosaminyltransferase 7                       | 2.50  | 1.24  | 1.17   | 8.10  | -0.90 | 4.15E-01 | -1.98  | 3.77E-02 | 4.35  | 1.36E-05 | EGA4-2 |
| ENSMMUG00000013407 |           |                                                                       | 0.33  | 2.55  | 0.30   | 2.48  | 1.61  | 3.19E-01 | -4.27  | 2.12E-03 | 3.83  | 3.10E-02 | EGA4-2 |
| ENSMMUG00000020087 | TMEM120A  | Transmembrane Protein 120A                                            | 0.28  | 0.17  | 0.38   | 1.25  | 3.28  | 2.05E-01 | -5.09  | 3.03E-02 | 8.49  | 1.85E-03 | EGA4-2 |
| ENSMMUG00000042360 | JAZF1     | JAZF Zinc Finger 1                                                    | 14.82 | 34.47 | 1.50   | 2.59  | 2.01  | 8.75E-02 | -8.07  | 4.40E-14 | 4.21  | 1.45E-03 | EGA4-2 |
| ENSMMUG00000039357 |           |                                                                       | 5.88  | 0.98  | 0.29   | 0.10  | -4.67 | 9.58E-02 | -17.69 | 4.77E-12 | ##### | 9.41E-11 | EGA4-2 |
| ENSMMUG00000005435 | ICA1      | Islet Cell Autoantigen 1                                              | 8.45  | 1.87  | 0.22   | 1.50  | -1.78 | 9.05E-02 | -4.72  | 9.38E-07 | 4.13  | 2.35E-04 | EGA4-2 |
| ENSMMUG00000017366 | TRIM56    | Tripartite Motif Containing 56                                        | 0.52  | 3.33  | 0.96   | 2.34  | 0.21  | 9.36E-01 | -4.09  | 1.37E-02 | 6.64  | 2.61E-04 | EGA4-2 |
| ENSMMUG00000012418 | PTPRZ1    | Protein Tyrosine Phosphatase, Receptor Type Z1                        | 0.42  | 0.82  | 0.20   | 1.33  | 1.45  | 4.06E-01 | -6.17  | 3.41E-05 | 4.67  | 1.08E-02 | EGA4-2 |
| ENSMMUG00000021017 | AGK       | Acylglycerol Kinase                                                   | ##### | ##### | 16.65  | 28.45 | -0.38 | 7.34E-01 | -3.96  | 2.40E-07 | 2.14  | 4.30E-02 | EGA4-2 |
| ENSMMUG00000030144 | SELENOP   | Selenoprotein P                                                       | 4.02  | 0.77  | 0.10   | 0.91  | -2.03 | 2.53E-01 | -4.53  | 5.69E-03 | 4.62  | 2.82E-02 | EGA4-2 |
| ENSMMUG00000018398 | EFNA5     | Ephrin A5                                                             | 1.94  | 4.31  | 1.03   | 1.10  | 3.17  | 6.83E-02 | -10.37 | 1.55E-09 | 4.63  | 4.67E-02 | EGA4-2 |
| ENSMMUG00000010651 | PPIC      | Peptidylprolyl Isomerase C                                            | 30.12 | 21.81 | 4.32   | 48.00 | -0.67 | 5.64E-01 | -2.54  | 5.81E-03 | 3.82  | 2.31E-04 | EGA4-2 |
| ENSMMUG00000016682 | ALDH7A1   | Aldehyde Dehydrogenase 7 Family Member A1                             | 16.18 | 27.44 | 9.26   | 14.55 | 0.71  | 5.34E-01 | -2.99  | 8.75E-04 | 2.88  | 1.06E-02 | EGA4-2 |
| ENSMMUG00000009413 | FAXDC2    | Fatty Acid Hydroxylase Domain Containing 2                            | 4.08  | 7.14  | 0.18   | 0.76  | 0.81  | 6.53E-01 | -6.94  | 2.01E-07 | 4.11  | 1.87E-02 | EGA4-2 |
| ENSMMUG00000021549 | ADAM19    | ADAM Metallopeptidase Domain 19                                       | 3.44  | 1.57  | 0.46   | 1.77  | -0.99 | 6.09E-01 | -7.12  | 8.52E-06 | 7.29  | 4.30E-05 | EGA4-2 |
| ENSMMUG00000021701 | IL12B     | Interleukin 12B                                                       | 0.39  | 0.20  | 0.05   | 0.87  | -2.32 | 3.63E-01 | -19.51 | 1.18E-20 | ##### | 2.28E-21 | EGA4-2 |
| ENSMMUG00000010102 | SH3PXD2B  | SH3 And PX Domains 2B                                                 | 0.51  | 0.86  | 0.19   | 1.40  | 0.02  | 9.93E-01 | -4.01  | 1.15E-02 | 4.42  | 2.97E-02 | EGA4-2 |
| ENSMMUG00000015363 | DTNBP1    | Dystrobrevin Binding Protein 1                                        | 9.61  | 4.55  | 0.94   | 3.77  | -1.36 | 3.51E-01 | -3.77  | 2.89E-03 | 4.62  | 2.67E-03 | EGA4-2 |
| ENSMMUG00000020831 | ZNF165    | Zinc Finger Protein 165                                               | 1.31  | 1.02  | 0.29   | 0.62  | 0.36  | 8.01E-01 | -4.22  | 1.66E-05 | 3.53  | 4.61E-03 | EGA4-2 |
| ENSMMUG00000015909 | TEAD3     | TEA Domain Transcription Factor 3                                     | 1.83  | 10.80 | 0.64   | 2.12  | 0.21  | 9.28E-01 | -3.81  | 8.89E-03 | 3.86  | 4.23E-02 | EGA4-2 |
| ENSMMUG00000005575 | TRERF1    | Transcriptional Regulating Factor 1                                   | 5.33  | 4.14  | 0.23   | 1.37  | -0.96 | 5.17E-01 | -5.99  | 1.59E-07 | 4.18  | 3.22E-03 | EGA4-2 |
| ENSMMUG00000029682 | BICRAL    | BRD4 Interacting Chromatin Remodeling Complex Associated Protein Like | 0.51  | 2.06  | 0.51   | 2.23  | 2.29  | 5.75E-02 | -2.60  | 2.72E-02 | 3.27  | 2.60E-02 | EGA4-2 |
| ENSMMUG00000018003 | RAB23     | RAB23, Member RAS Oncogene Family                                     | 21.99 | 24.93 | 2.40   | 5.76  | -0.28 | 8.51E-01 | -4.04  | 2.32E-05 | 3.43  | 4.42E-03 | EGA4-2 |
| ENSMMUG00000022458 | ZNF292    | Zinc Finger Protein 292                                               | 4.74  | 5.92  | 1.53   | 6.26  | 0.29  | 7.87E-01 | -2.33  | 1.70E-03 | 2.44  | 7.78E-03 | EGA4-2 |
| ENSMMUG00000007142 | SNX9      | Sorting Nexin 9                                                       | 34.19 | 25.27 | 3.62   | 17.69 | -0.32 | 8.49E-01 | -3.48  | 1.57E-03 | 2.94  | 4.51E-02 | EGA4-2 |
| ENSMMUG00000021498 | L3MBTL3   | L3MBTL3, Histone Methyl-lysine Binding Protein                        | 2.23  | 2.69  | 1.28   | 2.28  | 0.60  | 6.17E-01 | -2.21  | 2.12E-02 | 2.70  | 2.45E-02 | EGA4-2 |
| ENSMMUG00000020365 | ARHGAP18  | Rho GTPase Activating Protein 18                                      | ##### | ##### | 21.41  | 47.03 | -1.10 | 2.71E-01 | -4.54  | 2.38E-08 | 3.25  | 1.11E-03 | EGA4-2 |
| ENSMMUG00000041797 |           |                                                                       | 3.03  | 0.03  | 0.00   | 0.25  | -7.09 | 1.24E-01 | -23.93 | 3.45E-09 | ##### | 2.90E-09 | EGA4-2 |
| ENSMMUG00000012144 | SEMA6D    | Semaphorin 6D                                                         | 0.95  | 0.90  | 0.18   | 7.36  | -0.02 | 9.94E-01 | -4.01  | 2.03E-03 | 5.91  | 3.39E-05 | EGA4-2 |
| ENSMMUG00000042330 |           |                                                                       | 1.65  | 25.57 | 2.97   | 3.64  | 2.69  | 6.31E-02 | -4.84  | 2.43E-04 | 5.38  | 4.95E-04 | EGA4-2 |
| ENSMMUG00000029446 | TMEM253   | Transmembrane Protein 253                                             | 0.75  | 0.74  | 0.03   | 0.30  | -1.34 | 5.73E-01 | -4.97  | 1.18E-02 | 6.20  | 1.11E-02 | EGA4-2 |
| ENSMMUG00000019653 | SLC7A8    | Solute Carrier Family 7 Member 8                                      | 30.84 | 63.63 | 3.57   | 17.08 | 0.98  | 3.99E-01 | -5.67  | 4.91E-10 | 3.57  | 1.61E-03 | EGA4-2 |
| ENSMMUG00000003123 | AP4S1     | Adaptor Related Protein Complex 4 Sigma 1 Subunit                     | 0.61  | 1.18  | 1.59   | 2.49  | 0.62  | 7.11E-01 | -3.05  | 1.76E-02 | 4.78  | 8.61E-04 | EGA4-2 |
| ENSMMUG00000007264 | TMEM30B   | Transmembrane Protein 30B                                             | 8.80  | 20.31 | 1.22   | 0.35  | -0.27 | 9.05E-01 | -9.53  | 8.32E-10 | 5.09  | 8.83E-03 | EGA4-2 |
| ENSMMUG00000019170 | PLEKHG3   | Pleckstrin Homology And RhoGEF Domain Containing G3                   | 3.82  | 9.40  | 1.11   | 3.01  | 1.70  | 1.84E-01 | -3.75  | 7.90E-04 | 3.00  | 4.58E-02 | EGA4-2 |
| ENSMMUG00000014256 | TMSB4X    | Thymosin Beta 4, X-linked                                             | ##### | ##### | 104.32 | ##### | -0.42 | 6.19E-01 | -2.01  | 1.73E-03 | 2.88  | 5.99E-05 | EGA4-2 |
| ENSMMUG00000000192 | MAP7D2    | MAP7 Domain Containing 2                                              | 4.79  | 2.72  | 0.92   | 0.94  | -0.83 | 3.89E-01 | -3.25  | 3.33E-05 | 2.28  | 2.94E-02 | EGA4-2 |
| ENSMMUG00000020392 | SMS       | Spermine Synthase                                                     | 10.76 | 11.50 | 5.37   | 15.55 | 0.88  | 3.60E-01 | -2.17  | 8.25E-03 | 2.25  | 3.12E-02 | EGA4-2 |
| ENSMMUG00000015655 | ARMCX3    | Armadillo Repeat Containing, X-linked 3                               | 0.91  | 1.25  | 0.34   | 3.13  | 0.26  | 9.00E-01 | -4.27  | 1.79E-03 | 6.51  | 2.34E-05 | EGA4-2 |



|                     |              |                                                                                                   |       |       |       |       |       |          |        |          |       |          |        |
|---------------------|--------------|---------------------------------------------------------------------------------------------------|-------|-------|-------|-------|-------|----------|--------|----------|-------|----------|--------|
| ENSMMUG00000045049  | LOC106995304 | Uncharacterized LOC106995304                                                                      | 1.97  | 25.27 | 0.23  | 0.00  | 0.65  | 8.73E-01 | -24.71 | 1.39E-22 | ##### | 1.61E-06 | EGA4-2 |
| ENSMMUG0000008818   | SMARCA1      | SWI/SNF Related, Matrix Associated, Actin Dependent Regulator Of Chromatin, Subfamily A, Member 1 | 6.25  | 1.41  | 0.07  | 0.25  | -1.34 | 3.72E-01 | -5.80  | 7.45E-06 | 4.01  | 1.65E-02 | EGA4-2 |
| ENSMMUG00000047665  |              |                                                                                                   | 6.04  | 2.18  | 0.99  | 5.88  | -0.93 | 5.62E-01 | -3.78  | 3.61E-03 | 4.97  | 7.91E-04 | EGA4-2 |
| ENSMMUG0000003480   |              |                                                                                                   | 7.10  | 4.90  | 0.69  | 1.43  | -0.79 | 4.62E-01 | -4.20  | 3.17E-06 | 2.58  | 2.95E-02 | EGA4-2 |
| ENSMMUG00000010251  | MTCP1        | Mature T-cell Proliferation 1                                                                     | 5.18  | 1.90  | 0.11  | 0.63  | -1.69 | 1.59E-01 | -5.03  | 6.44E-06 | 3.82  | 6.89E-03 | EGA4-2 |
| ENSMMUG00000019211  | FDFT1        | Farnesyl-diphosphate Farnesyltransferase 1                                                        | 99.79 | 43.76 | 19.07 | 42.95 | -1.30 | 5.88E-02 | -2.11  | 8.44E-04 | 1.69  | 4.56E-02 | EGA4-2 |
| ENSMMUG00000019208  | GATA4        | GATA Binding Protein 4                                                                            | 0.86  | 0.49  | 0.20  | 2.06  | 0.33  | 8.74E-01 | -4.90  | 4.75E-04 | 7.29  | 9.83E-07 | EGA4-2 |
| ENSMMUG00000017711  | LZTS1        | Leucine Zipper Tumor Suppressor 1                                                                 | 0.09  | 0.17  | 0.07  | 0.64  | 0.13  | 9.64E-01 | -4.94  | 1.48E-02 | 7.29  | 1.31E-03 | EGA4-2 |
| ENSMMUG00000012718  | DPYSL2       | Dihydropyrimidinase Like 2                                                                        | 24.98 | 13.19 | 4.03  | 11.15 | -1.13 | 1.56E-01 | -3.34  | 9.53E-07 | 2.56  | 2.35E-03 | EGA4-2 |
| ENSMMUG0000000208   | NRG1         | Neuregulin 1                                                                                      | 4.57  | 5.42  | 1.00  | 0.96  | -0.07 | 9.71E-01 | -6.48  | 2.22E-08 | 5.04  | 3.21E-04 | EGA4-2 |
| ENSMMUG00000004846  | LOC704722    | Sterile Alpha Motif Domain-containing Protein 12                                                  | 10.63 | 6.13  | 0.12  | 1.71  | -1.34 | 4.80E-01 | -6.86  | 2.05E-05 | 5.99  | 2.39E-03 | EGA4-2 |
| ENSMMUG00000002607  |              |                                                                                                   | 0.97  | 1.22  | 0.21  | 3.96  | 0.05  | 9.85E-01 | -5.45  | 1.39E-03 | 5.91  | 2.54E-03 | EGA4-2 |
| ENSMMUG00000007152  | SHARPIN      | SHANK Associated RH Domain Interactor                                                             | 3.53  | 3.38  | 0.69  | 2.42  | 0.26  | 8.95E-01 | -3.09  | 1.78E-02 | 4.43  | 4.35E-03 | EGA4-2 |
| ENSMMUG00000010201  | ATN1         | Atrophin 1                                                                                        | 5.78  | 12.70 | 3.27  | 15.68 | 0.64  | 5.27E-01 | -2.53  | 1.39E-03 | 3.48  | 9.66E-05 | EGA4-2 |
| ENSMMUG00000038065  |              |                                                                                                   | 0.87  | 0.76  | 0.00  | 0.18  | -2.56 | 4.29E-01 | -27.25 | 1.38E-27 | ##### | 1.77E-21 | EGA4-2 |
| ENSMMUG00000021979  | ESYT1        | Extended Synaptotagmin 1                                                                          | 0.44  | 4.31  | 0.56  | 3.60  | 2.45  | 7.81E-02 | -2.66  | 4.78E-02 | 5.56  | 1.04E-04 | EGA4-2 |
| ENSMMUG00000021789  | R3HDM2       | R3H Domain Containing 2                                                                           | 17.87 | 38.12 | 8.03  | 22.22 | 1.11  | 1.69E-01 | -2.60  | 1.89E-04 | 1.93  | 3.96E-02 | EGA4-2 |
| ENSMMUG00000001952  | SRGAP1       | SLIT-ROBO Rho GTPase Activating Protein 1                                                         | 2.65  | 1.22  | 0.33  | 3.26  | -2.17 | 1.42E-01 | -2.87  | 4.23E-02 | 5.05  | 1.41E-03 | EGA4-2 |
| ENSMMUG00000004554  |              |                                                                                                   | 0.50  | 4.28  | 2.67  | 0.84  | 3.20  | 1.64E-01 | -6.78  | 1.81E-03 | 5.74  | 4.49E-02 | EGA4-2 |
| ENSMMUG00000019649  | KCTD10       | Potassium Channel Tetramerization Domain Containing 10                                            | 24.62 | 9.30  | 2.89  | 5.59  | -1.19 | 6.35E-02 | -2.20  | 1.60E-04 | 1.64  | 3.57E-02 | EGA4-2 |
| ENSMMUG00000001909  | CUX2         | Cut Like Homeobox 2                                                                               | 1.63  | 0.46  | 0.14  | 0.66  | -2.42 | 9.52E-02 | -2.89  | 4.84E-02 | 4.41  | 1.02E-02 | EGA4-2 |
| ENSMMUG00000002081  | BEND7        | BEN Domain Containing 7                                                                           | 0.94  | 0.79  | 0.18  | 2.38  | 0.00  | 9.99E-01 | -2.77  | 3.05E-02 | 5.46  | 9.35E-05 | EGA4-2 |
| ENSMMUG00000010587  |              |                                                                                                   | 0.89  | 7.26  | 0.00  | 0.16  | 3.91  | 3.49E-01 | -29.09 | 9.66E-19 | ##### | 5.65E-13 | EGA4-2 |
| ENSMMUG00000001374  | SVIL         | Supervillin                                                                                       | 0.35  | 1.08  | 0.03  | 0.30  | 0.83  | 6.01E-01 | -7.96  | 6.95E-09 | 4.69  | 4.42E-03 | EGA4-2 |
| ENSMMUG00000023415  |              |                                                                                                   | 6.19  | 3.12  | 0.00  | 0.12  | -3.63 | 9.87E-02 | -20.60 | 5.42E-25 | ##### | 6.11E-12 | EGA4-2 |
| ENSMMUG00000021400  | RHOBTB1      | Rho Related BTB Domain Containing 1                                                               | 1.14  | 1.24  | 0.26  | 1.67  | -0.64 | 7.67E-01 | -4.65  | 3.50E-03 | 5.20  | 6.54E-03 | EGA4-2 |
| ENSMMUG00000006841  | MYOF         | Myoferlin                                                                                         | 69.38 | 37.22 | 5.86  | 22.67 | -0.95 | 2.27E-01 | -3.80  | 5.36E-09 | 2.95  | 1.32E-04 | EGA4-2 |
| ENSMMUG00000019633  | FRAT2        | FRAT2, WNT Signaling Pathway Regulator                                                            | 4.35  | 8.28  | 1.06  | 3.16  | 0.78  | 4.46E-01 | -3.42  | 3.01E-05 | 2.40  | 2.72E-02 | EGA4-2 |
| ENSMMUG00000004394  | TRIM8        | Tripartite Motif Containing 8                                                                     | 3.28  | 2.04  | 1.09  | 5.10  | -0.73 | 5.41E-01 | -3.33  | 4.02E-04 | 4.45  | 2.06E-05 | EGA4-2 |
| ENSMMUG00000015325  |              |                                                                                                   | 6.68  | 3.94  | 0.46  | 2.70  | -1.72 | 1.54E-01 | -4.49  | 2.39E-05 | 3.23  | 1.83E-02 | EGA4-2 |
| ENSMMUG00000038379  |              |                                                                                                   | 0.32  | 0.58  | 0.00  | 0.71  | -3.48 | 6.98E-01 | -21.43 | 1.06E-03 | ##### | 2.54E-03 | EGA4-2 |
| ENSMMUG00000000441  |              |                                                                                                   | 0.62  | 3.57  | 0.04  | 0.50  | 0.02  | 9.94E-01 | -6.23  | 1.31E-03 | 6.04  | 1.78E-02 | EGA4-2 |
| ENSMMUG000000009117 |              |                                                                                                   | 14.86 | 8.78  | 0.15  | 0.90  | -1.67 | 3.07E-01 | -5.43  | 8.58E-05 | 3.95  | 3.18E-02 | EGA4-2 |
| ENSMMUG00000003874  | CTSD         | Cathepsin D                                                                                       | 8.41  | 8.78  | 4.82  | 53.47 | 0.20  | 9.03E-01 | -2.46  | 1.96E-02 | 4.70  | 3.39E-05 | EGA4-2 |
| ENSMMUG00000000368  | TSPAN18      | Tetraspanin 18                                                                                    | 11.19 | 3.16  | 0.82  | 7.36  | -1.46 | 2.34E-01 | -4.28  | 5.01E-05 | 4.98  | 3.39E-05 | EGA4-2 |
| ENSMMUG00000038590  |              |                                                                                                   | 1.24  | 0.80  | 0.00  | 0.04  | -8.24 | 1.70E-01 | -21.06 | 5.87E-05 | ##### | 3.05E-05 | EGA4-2 |
| ENSMMUG000000042971 |              |                                                                                                   | 13.23 | 5.24  | 1.03  | 5.17  | -1.62 | 2.11E-01 | -4.40  | 1.95E-04 | 4.61  | 1.19E-03 | EGA4-2 |
| ENSMMUG00000002489  |              |                                                                                                   | 11.17 | 16.93 | 7.12  | 12.06 | 0.62  | 5.76E-01 | -2.40  | 5.90E-03 | 2.58  | 1.79E-02 | EGA4-2 |
| ENSMMUG00000003717  | PRSS23       | Protease, Serine 23                                                                               | 9.88  | 3.21  | 1.62  | 12.80 | -1.31 | 1.80E-01 | -4.07  | 2.05E-06 | 5.64  | 8.82E-10 | EGA4-2 |
| ENSMMUG00000010218  |              |                                                                                                   | 12.25 | 26.42 | 0.20  | 0.62  | 0.77  | 6.49E-01 | -9.28  | 2.08E-12 | 4.13  | 1.94E-02 | EGA4-2 |
| ENSMMUG00000022603  | ARHGAP42     | Rho GTPase Activating Protein 42                                                                  | 1.03  | 0.79  | 0.36  | 2.56  | 0.09  | 9.57E-01 | -4.25  | 1.38E-04 | 5.05  | 5.13E-05 | EGA4-2 |
| ENSMMUG00000005440  | ELMOD1       | ELMO Domain Containing 1                                                                          | 0.98  | 2.31  | 0.72  | 4.38  | -0.06 | 9.79E-01 | -3.48  | 2.42E-02 | 4.82  | 8.43E-03 | EGA4-2 |
| ENSMMUG000000048435 | ZC3H12C      | Zinc Finger CCCH-type Containing 12C                                                              | 0.74  | 1.25  | 0.19  | 0.89  | -0.36 | 8.69E-01 | -3.43  | 2.05E-02 | 5.55  | 7.30E-04 | EGA4-2 |
| ENSMMUG000000005482 | KMT2A        | Lysine Methyltransferase 2A                                                                       | 6.12  | 5.75  | 2.38  | 10.49 | -0.12 | 9.21E-01 | -2.10  | 5.74E-03 | 2.71  | 2.43E-03 | EGA4-2 |
| ENSMMUG00000012249  | OAF          | Out At First Homolog                                                                              | 3.98  | 3.03  | 0.63  | 2.91  | -0.74 | 6.26E-01 | -4.95  | 2.08E-05 | 4.52  | 9.88E-04 | EGA4-2 |
| ENSMMUG000000045516 |              |                                                                                                   | 5.81  | 5.84  | 0.09  | 2.32  | -0.82 | 7.36E-01 | -6.41  | 5.54E-04 | 5.85  | 1.25E-02 | EGA4-2 |
| ENSMMUG00000000376  | BIN1         | Bridging Integrator 1                                                                             | 2.68  | 1.56  | 0.71  | 2.94  | -0.47 | 7.80E-01 | -4.45  | 1.49E-04 | 5.02  | 2.02E-04 | EGA4-2 |
| ENSMMUG000000009593 | WIPF1        | WAS/WASL Interacting Protein Family Member 1                                                      | 0.14  | 0.39  | 0.11  | 2.38  | 0.77  | 6.86E-01 | -4.55  | 1.97E-03 | 8.03  | 8.38E-08 | EGA4-2 |
| ENSMMUG00000011574  | CAVIN2       | Caveolae Associated Protein 2                                                                     | 1.04  | 0.57  | 0.40  | 2.15  | -0.79 | 6.10E-01 | -3.21  | 9.45E-03 | 6.44  | 1.37E-06 | EGA4-2 |

|                     |           |                                                            |       |       |       |       |       |          |        |          |       |          |        |
|---------------------|-----------|------------------------------------------------------------|-------|-------|-------|-------|-------|----------|--------|----------|-------|----------|--------|
| ENSMMUG00000039119  |           |                                                            | 0.88  | 48.29 | 0.73  | 4.45  | 2.27  | 2.73E-01 | -5.88  | 1.10E-03 | 6.49  | 3.88E-03 | EGA4-2 |
| ENSMMUG00000009009  | BMPR2     | Bone Morphogenetic Protein Receptor Type 2                 | 16.80 | 9.24  | 2.30  | 13.12 | -0.67 | 5.30E-01 | -2.51  | 3.24E-03 | 3.05  | 2.42E-03 | EGA4-2 |
| ENSMMUG000000031276 |           |                                                            | 3.66  | 3.27  | 1.10  | 4.48  | -0.30 | 7.87E-01 | -2.71  | 2.77E-04 | 2.74  | 2.23E-03 | EGA4-2 |
| ENSMMUG00000012321  | FN1       | Fibronectin 1                                              | 17.02 | 9.89  | 0.36  | 5.13  | -0.14 | 9.42E-01 | -6.34  | 1.90E-08 | 4.04  | 4.61E-03 | EGA4-2 |
| ENSMMUG000000047169 | PDE6D     | Phosphodiesterase 6D                                       | 4.01  | 5.19  | 0.64  | 5.35  | 0.00  | 1.00E+00 | -3.38  | 1.70E-03 | 3.94  | 1.98E-03 | EGA4-2 |
| ENSMMUG00000003105  | INPP5E    | Inositol Polyphosphate-5-phosphatase E                     | 5.51  | 5.91  | 0.75  | 2.08  | 0.39  | 8.01E-01 | -4.36  | 3.47E-05 | 3.04  | 3.31E-02 | EGA4-2 |
| ENSMMUG000000023495 | RALGPS1   | Ral GEF With PH Domain And SH3 Binding Motif 1             | 1.09  | 1.42  | 0.16  | 0.86  | 1.19  | 4.34E-01 | -5.14  | 3.26E-05 | 4.78  | 1.42E-03 | EGA4-2 |
| ENSMMUG000000013105 | LOC702370 | Astrotactin-2                                              | 1.86  | 2.07  | 0.07  | 0.86  | -0.13 | 9.56E-01 | -6.24  | 2.34E-05 | 5.58  | 1.61E-03 | EGA4-2 |
| ENSMMUG000000013099 | PAPPA     | Pappalysin 1                                               | 1.02  | 0.67  | 0.04  | 0.18  | -2.43 | 1.44E-01 | -4.15  | 1.03E-02 | 4.95  | 1.45E-02 | EGA4-2 |
| ENSMMUG000000012745 | ZNF483    | Zinc Finger Protein 483                                    | 3.23  | 5.48  | 0.42  | 1.58  | 1.21  | 4.80E-01 | -6.07  | 1.11E-05 | 5.67  | 7.63E-04 | EGA4-2 |
| ENSMMUG000000017151 | ZNF462    | Zinc Finger Protein 462                                    | 3.75  | 2.99  | 0.96  | 3.39  | -1.04 | 3.29E-01 | -2.71  | 2.61E-03 | 3.16  | 3.29E-03 | EGA4-2 |
| ENSMMUG000000002853 | CORO2A    | Coronin 2A                                                 | 16.67 | 5.79  | 0.83  | 2.06  | -1.67 | 1.29E-01 | -4.27  | 1.01E-05 | 3.08  | 1.41E-02 | EGA4-2 |
| ENSMMUG000000010213 | GLI1PR2   | GLI Pathogenesis Related 2                                 | 8.22  | 4.93  | 2.88  | 9.58  | -1.15 | 2.37E-01 | -2.13  | 1.45E-02 | 2.43  | 2.52E-02 | EGA4-2 |
| ENSMMUG000000010985 | EQTN      | Equatorin                                                  | 9.11  | 3.32  | 0.92  | 2.94  | -1.85 | 1.12E-01 | -3.85  | 2.33E-04 | 3.10  | 2.27E-02 | EGA4-2 |
| ENSMMUG000000019388 | MPDZ      | Multiple PDZ Domain Crumbs Cell Polarity Complex Component | 25.61 | 7.68  | 3.03  | 7.32  | -1.34 | 1.10E-01 | -2.22  | 3.69E-03 | 2.18  | 2.57E-02 | EGA4-2 |
| ENSMMUG000000006952 | PTPRD     | Protein Tyrosine Phosphatase, Receptor Type D              | 9.22  | 2.40  | 2.60  | 22.74 | -1.63 | 9.54E-02 | -2.89  | 1.24E-03 | 5.47  | 3.76E-09 | EGA4-2 |
| ENSMMUG000000013303 | ALDH1A1   | Aldehyde Dehydrogenase 1 Family Member A1                  | 1.88  | 0.19  | 0.04  | 0.34  | -1.64 | 4.83E-01 | -4.42  | 4.01E-02 | 5.32  | 4.87E-02 | EGA4-2 |
| ENSMMUG000000008685 | SLC28A3   | Solute Carrier Family 28 Member 3                          | 14.13 | 4.00  | 2.15  | 1.75  | -1.74 | 1.12E-01 | -4.25  | 1.14E-05 | 2.87  | 2.63E-02 | EGA4-2 |
| ENSMMUG000000042650 |           |                                                            | 0.74  | 1.57  | 0.03  | 1.00  | 1.63  | 4.66E-01 | -5.17  | 8.04E-03 | 5.41  | 3.04E-02 | EGA4-2 |
| ENSMMUG000000017096 | SH3YL1    | SH3 And SYLF Domain Containing 1                           | 3.04  | 0.70  | 2.72  | 1.52  | -1.87 | 8.28E-02 | -3.03  | 5.27E-03 | 3.97  | 1.18E-03 | EGA4-2 |
| ENSMMUG000000018033 | ASAP2     | ArfGAP With SH3 Domain, Ankyrin Repeat And PH Domain 2     | 63.81 | 35.93 | 10.21 | 40.90 | -0.66 | 5.00E-01 | -2.64  | 6.56E-04 | 2.13  | 3.92E-02 | EGA4-2 |
| ENSMMUG000000016461 | EFR3B     | EFR3 Homolog B                                             | 4.20  | 6.43  | 0.93  | 8.13  | 0.55  | 7.26E-01 | -5.53  | 1.41E-06 | 5.23  | 5.82E-05 | EGA4-2 |
| ENSMMUG000000021436 | LTBP1     | Latent Transforming Growth Factor Beta Binding Protein 1   | 7.45  | 3.48  | 0.71  | 3.69  | -0.56 | 6.54E-01 | -4.25  | 2.70E-06 | 4.28  | 4.42E-05 | EGA4-2 |
| ENSMMUG000000022261 | PPM1B     | Protein Phosphatase, Mg2+/Mn2+ Dependent 1B                | 12.13 | 6.85  | 2.58  | 8.40  | -0.48 | 6.25E-01 | -1.59  | 4.29E-02 | 1.96  | 4.98E-02 | EGA4-2 |
| ENSMMUG000000044941 |           |                                                            | 1.94  | 1.86  | 0.04  | 0.10  | -1.21 | 7.93E-01 | -20.98 | 1.57E-11 | ##### | 1.77E-05 | EGA4-2 |
| ENSMMUG000000022903 | INPP4A    | Inositol Polyphosphate-4-phosphatase Type I A              | 4.69  | 3.95  | 2.49  | 2.40  | -0.24 | 8.76E-01 | -2.96  | 2.84E-03 | 3.15  | 1.07E-02 | EGA4-2 |
| ENSMMUG000000004169 | TMEM182   | Transmembrane Protein 182                                  | 2.70  | 4.35  | 0.65  | 0.55  | -0.94 | 5.85E-01 | -5.26  | 9.95E-05 | 5.07  | 2.50E-03 | EGA4-2 |
| ENSMMUG000000041010 |           |                                                            | 1.36  | 1.60  | 0.13  | 0.97  | -1.13 | 7.11E-01 | -5.31  | 2.54E-02 | 7.19  | 1.49E-02 | EGA4-2 |
| ENSMMUG000000002702 | FREM2     | FRAS1 Related Extracellular Matrix Protein 2               | 0.20  | 0.31  | 0.11  | 1.56  | 0.33  | 8.96E-01 | -5.26  | 1.49E-03 | 6.95  | 1.58E-04 | EGA4-2 |
| ENSMMUG000000009890 | FARP1     | FERM, ARH/RhoGEF And Pleckstrin Domain Protein 1           | 10.22 | 6.94  | 1.31  | 6.82  | -0.47 | 7.27E-01 | -4.77  | 2.97E-07 | 4.44  | 3.86E-05 | EGA4-2 |
| ENSMMUG000000022280 | COL4A1    | Collagen Type IV Alpha 1 Chain                             | 1.48  | 0.58  | 0.39  | 5.46  | -0.21 | 9.18E-01 | -4.70  | 2.47E-04 | 7.81  | 9.55E-09 | EGA4-2 |
| ENSMMUG000000022282 | COL4A2    | Collagen Type IV Alpha 2 Chain                             | 1.29  | 0.39  | 0.33  | 2.25  | -0.06 | 9.73E-01 | -5.06  | 1.86E-05 | 6.67  | 1.16E-07 | EGA4-2 |
| ENSMMUG000000007428 | GAS6      | Growth Arrest Specific 6                                   | 2.32  | 1.91  | 0.75  | 5.86  | 0.39  | 8.51E-01 | -4.64  | 8.72E-04 | 5.43  | 9.89E-04 | EGA4-2 |
| ENSMMUG000000048418 |           |                                                            | 16.58 | 43.64 | 6.21  | 35.09 | -0.04 | 9.86E-01 | -4.85  | 1.91E-03 | 6.13  | 6.90E-04 | EGA4-2 |
| ENSMMUG000000012127 | BCAS4     | Breast Carcinoma Amplified Sequence 4                      | 1.77  | 0.46  | 0.00  | 0.01  | -4.53 | 2.39E-01 | -28.37 | 2.72E-19 | ##### | 8.35E-12 | EGA4-2 |
| ENSMMUG000000012029 | SULF2     | Sulfatase 2                                                | 11.58 | 4.92  | 4.11  | 18.51 | -0.71 | 4.46E-01 | -1.59  | 4.78E-02 | 3.61  | 1.59E-05 | EGA4-2 |
| ENSMMUG000000027232 | MIR644    | MicroRNA 644                                               | 0.32  | 0.03  | 0.22  | 1.18  | -0.91 | 9.32E-01 | -14.81 | 3.10E-02 | ##### | 1.64E-02 | EGA4-2 |
| ENSMMUG000000003357 | SREBF2    | Sterol Regulatory Element Binding Transcription Factor 2   | 9.88  | 8.36  | 3.09  | 16.48 | 0.01  | 9.94E-01 | -2.52  | 9.25E-04 | 2.63  | 4.47E-03 | EGA4-2 |
| ENSMMUG000000049087 |           |                                                            | 2.51  | 4.36  | 0.00  | 0.10  | 0.58  | 9.00E-01 | -23.12 | 1.50E-16 | ##### | 1.41E-05 | EGA4-2 |
| ENSMMUG000000012523 | FLOT2     | Flotillin 2                                                | 11.74 | 7.52  | 1.16  | 7.49  | -0.26 | 8.86E-01 | -3.19  | 7.00E-03 | 3.57  | 1.59E-02 | EGA4-2 |
| ENSMMUG000000040384 | MIR378J   | MicroRNA 378j                                              | 0.06  | 0.19  | 0.00  | 0.86  | 8.32  | 2.82E-01 | -22.16 | 6.69E-04 | ##### | 9.36E-09 | EGA4-2 |
| ENSMMUG000000001505 | KRT23     | Keratin 23                                                 | 3.15  | 1.76  | 0.25  | 0.69  | -2.77 | 1.26E-01 | -4.63  | 6.59E-03 | 5.08  | 1.50E-02 | EGA4-2 |
| ENSMMUG000000014633 | ETV4      | ETS Variant 4                                              | 0.26  | 0.97  | 0.82  | 4.95  | 1.22  | 4.83E-01 | -3.76  | 1.04E-02 | 6.33  | 6.00E-05 | EGA4-2 |
| ENSMMUG000000012439 | GNPTG     | N-acetylglucosamine-1-phosphate Transferase Gamma Subunit  | 9.29  | 2.72  | 1.55  | 2.50  | -1.67 | 1.83E-01 | -3.86  | 7.08E-04 | 3.73  | 7.64E-03 | EGA4-2 |
| ENSMMUG000000046237 | ABAT      | 4-aminobutyrate Aminotransferase                           | 9.16  | 3.36  | 0.19  | 1.10  | -1.21 | 2.61E-01 | -4.16  | 4.28E-06 | 2.75  | 2.29E-02 | EGA4-2 |
| ENSMMUG000000015696 | KIFC3     | Kinesin Family Member C3                                   | 5.12  | 1.76  | 0.22  | 1.29  | -0.98 | 4.20E-01 | -4.14  | 2.36E-05 | 3.47  | 4.45E-03 | EGA4-2 |

|                     |           |                                                                  |       |       |      |       |        |          |        |          |       |          |        |
|---------------------|-----------|------------------------------------------------------------------|-------|-------|------|-------|--------|----------|--------|----------|-------|----------|--------|
| ENSMMUG0000005520   | CDH11     | Cadherin 11                                                      | 1.40  | 1.17  | 0.02 | 0.17  | 0.11   | 9.49E-01 | -6.64  | 1.70E-08 | 3.66  | 2.00E-02 | EGA4-2 |
| ENSMMUG00000021041  | ZFH3      | Zinc Finger Homeobox 3                                           | 29.63 | 29.82 | 2.52 | 11.88 | 0.14   | 9.16E-01 | -4.29  | 8.25E-08 | 2.81  | 5.88E-03 | EGA4-2 |
| ENSMMUG00000015178  | CDH2      | Cadherin 2                                                       | 22.40 | 6.39  | 3.72 | 10.78 | -1.37  | 1.02E-01 | -1.94  | 1.31E-02 | 2.79  | 1.98E-03 | EGA4-2 |
| ENSMMUG0000003041   | MYO5B     | Myosin VB                                                        | 7.00  | 7.58  | 1.39 | 4.73  | 0.44   | 7.07E-01 | -3.67  | 6.67E-06 | 2.72  | 9.06E-03 | EGA4-2 |
| ENSMMUG00000010402  | CCBE1     | Collagen And Calcium Binding EGF Domains 1                       | 6.87  | 3.51  | 0.29 | 2.49  | -1.31  | 3.70E-01 | -4.85  | 6.66E-05 | 3.97  | 9.40E-03 | EGA4-2 |
| ENSMMUG00000008942  | CNDP1     | Carnosine Dipeptidase 1                                          | 1.11  | 0.80  | 0.21 | 0.94  | 0.27   | 8.88E-01 | -2.77  | 3.41E-02 | 3.92  | 1.81E-02 | EGA4-2 |
| ENSMMUG00000048855  | GNG7      | G Protein Subunit Gamma 7                                        | 6.27  | 7.21  | 0.02 | 0.81  | -0.96  | 7.45E-01 | -21.53 | 5.42E-25 | ##### | 1.48E-19 | EGA4-2 |
| ENSMMUG00000023303  | EV15L     | Ecotropic Viral Integration Site 5 Like                          | 1.14  | 1.68  | 0.09 | 0.69  | -0.92  | 7.10E-01 | -4.86  | 1.08E-02 | 4.91  | 4.88E-02 | EGA4-2 |
| ENSMMUG00000038895  |           |                                                                  | 0.46  | 15.10 | 2.47 | 0.22  | 0.42   | 9.06E-01 | -6.05  | 8.43E-03 | 6.19  | 3.62E-02 | EGA4-2 |
| ENSMMUG00000028749  | APOC1     | Apolipoprotein C1                                                | 3.45  | 9.08  | 1.24 | 4.34  | -0.60  | 8.01E-01 | -4.16  | 1.37E-02 | 6.53  | 5.82E-04 | EGA4-2 |
| ENSMMUG00000003190  | CCDC8     | Coiled-coil Domain Containing 8                                  | 1.08  | 0.47  | 0.05 | 0.28  | -2.13  | 3.29E-01 | -21.72 | 1.24E-32 | ##### | 2.82E-40 | EGA4-2 |
| ENSMMUG00000037660  |           |                                                                  | 9.10  | 2.72  | 0.00 | 0.04  | -3.38  | 4.53E-01 | -20.13 | 1.92E-08 | ##### | 4.94E-04 | EGA4-2 |
| ENSMMUG00000023355  |           |                                                                  | 1.51  | 2.84  | 1.28 | 2.53  | 0.80   | 3.20E-01 | -2.03  | 4.33E-03 | 2.18  | 1.31E-02 | EGA4-2 |
| ENSMMUG00000017851  | ZNF835    | Zinc Finger Protein 835                                          | 0.86  | 0.38  | 0.86 | 0.03  | -1.84  | 4.67E-01 | -20.17 | 6.23E-23 | ##### | 1.93E-12 | EGA4-2 |
| ENSMMUG00000037535  |           |                                                                  | 0.92  | 1.53  | 0.41 | 1.07  | -0.18  | 9.36E-01 | -3.35  | 2.44E-02 | 4.78  | 7.62E-03 | EGA4-2 |
| ENSMMUG00000044465  |           |                                                                  | 0.64  | 2.55  | 0.43 | 2.49  | 1.77   | 1.99E-01 | -3.42  | 6.70E-03 | 3.95  | 1.15E-02 | EGA4-2 |
| ENSMMUG000000046575 |           |                                                                  | 1.25  | 38.13 | 1.44 | 1.58  | 2.46   | 9.96E-02 | -5.87  | 1.49E-05 | 4.47  | 1.11E-02 | EGA4-2 |
| ENSMMUG00000039937  |           |                                                                  | 0.67  | 1.58  | 0.98 | 2.22  | 0.47   | 8.18E-01 | -3.39  | 2.35E-02 | 4.07  | 2.57E-02 | EGA4-2 |
| ENSMMUG00000046293  |           |                                                                  | 0.38  | 3.33  | 0.19 | 2.36  | 0.96   | 6.42E-01 | -5.33  | 7.83E-04 | 6.90  | 1.13E-04 | EGA4-2 |
| ENSMMUG00000047185  |           |                                                                  | 0.49  | 2.85  | 0.25 | 2.40  | 2.48   | 6.24E-02 | -4.85  | 1.37E-04 | 5.32  | 4.32E-04 | EGA4-2 |
| ENSMMUG00000043377  |           |                                                                  | 0.99  | 11.48 | 0.19 | 0.28  | -0.09  | 9.80E-01 | -8.19  | 4.78E-04 | 6.80  | 2.54E-02 | EGA4-2 |
| ENSMMUG00000004677  | AGTRAP    | Angiotensin II Receptor Associated Protein                       | 0.64  | 0.08  | 0.68 | 4.18  | -3.23  | 5.45E-03 | 1.21   | 3.89E-01 | 4.08  | 1.73E-03 | EGA4-3 |
| ENSMMUG00000004767  | TMEM222   | Transmembrane Protein 222                                        | 0.85  | 0.63  | 0.86 | 1.91  | -2.42  | 3.76E-02 | 1.12   | 3.95E-01 | 3.61  | 6.58E-03 | EGA4-3 |
| ENSMMUG00000006576  | PBXIP1    | PBX Homeobox Interacting Protein 1                               | 0.66  | 0.19  | 0.25 | 0.63  | -3.03  | 8.41E-03 | 1.25   | 3.44E-01 | 3.34  | 2.52E-02 | EGA4-3 |
| ENSMMUG00000020295  | VANGL2    | VANGL Planar Cell Polarity Protein 2                             | 0.79  | 0.03  | 0.10 | 1.30  | -3.48  | 1.52E-02 | 0.22   | 9.23E-01 | 4.75  | 4.03E-03 | EGA4-3 |
| ENSMMUG00000044802  |           |                                                                  | 0.19  | 0.03  | 0.42 | 2.78  | -4.53  | 6.86E-03 | 2.76   | 1.26E-01 | 6.86  | 7.33E-05 | EGA4-3 |
| ENSMMUG00000021079  | NME7      | NME/NM23 Family Member 7                                         | 15.23 | 1.68  | 5.83 | 15.04 | -3.49  | 7.84E-06 | 1.14   | 2.15E-01 | 2.37  | 2.26E-02 | EGA4-3 |
| ENSMMUG00000022208  | SCCPDH    | Saccharopine Dehydrogenase (putative)                            | 7.74  | 0.79  | 0.47 | 10.74 | -3.20  | 1.09E-02 | -2.21  | 1.04E-01 | 6.54  | 1.09E-06 | EGA4-3 |
| ENSMMUG00000008791  | CD47      | CD47 Molecule                                                    | 6.34  | 0.56  | 0.60 | 4.91  | -5.50  | 5.58E-08 | 1.60   | 2.06E-01 | 3.25  | 1.52E-02 | EGA4-3 |
| ENSMMUG00000014516  | ITGB5     | Integrin Subunit Beta 5                                          | 1.64  | 0.54  | 0.82 | 3.27  | -3.05  | 2.17E-02 | 0.51   | 7.79E-01 | 4.40  | 3.81E-03 | EGA4-3 |
| ENSMMUG00000006340  | SLC6A6    | Solute Carrier Family 6 Member 6                                 | 4.87  | 0.80  | 2.11 | 8.92  | -4.84  | 2.16E-04 | 0.22   | 9.14E-01 | 5.22  | 6.90E-04 | EGA4-3 |
| ENSMMUG00000007191  | PPARG     | Peroxisome Proliferator Activated Receptor Gamma                 | 1.55  | 0.34  | 0.08 | 0.82  | -3.64  | 2.95E-02 | -2.63  | 1.49E-01 | 6.66  | 3.60E-04 | EGA4-3 |
| ENSMMUG00000000623  | P3H2      | Prolyl 3-hydroxylase 2                                           | 2.77  | 0.97  | 0.25 | 3.44  | -2.82  | 3.08E-02 | -2.36  | 7.74E-02 | 6.38  | 1.74E-06 | EGA4-3 |
| ENSMMUG00000009691  | C5H4orf19 | Chromosome 5 Open Reading Frame, Human C4orf19                   | 5.39  | 1.87  | 0.89 | 3.25  | -2.95  | 1.64E-02 | -1.35  | 3.32E-01 | 4.59  | 8.48E-04 | EGA4-3 |
| ENSMMUG00000007030  | C2CD2     | C2 Calcium Dependent Domain Containing 2                         | 3.06  | 0.39  | 0.79 | 2.20  | -3.01  | 3.71E-04 | 0.29   | 8.16E-01 | 2.24  | 4.87E-02 | EGA4-3 |
| ENSMMUG00000022394  | EGFR      | Epidermal Growth Factor Receptor                                 | 1.48  | 0.43  | 0.21 | 2.44  | -3.36  | 1.96E-02 | -0.51  | 8.02E-01 | 6.38  | 3.77E-05 | EGA4-3 |
| ENSMMUG00000010846  | ARL4A     | ADP Ribosylation Factor Like GTPase 4A                           | 2.54  | 1.00  | 0.50 | 3.18  | -2.77  | 3.17E-02 | -0.48  | 7.84E-01 | 4.00  | 8.72E-03 | EGA4-3 |
| ENSMMUG00000027138  |           |                                                                  | 0.14  | 0.03  | 0.26 | 0.52  | -21.41 | 1.16E-03 | 1.80   | 8.53E-01 | ##### | 2.12E-02 | EGA4-3 |
| ENSMMUG00000044463  | TRPV5     | Transient Receptor Potential Cation Channel Subfamily V Member 5 | 0.81  | 0.25  | 0.73 | 2.79  | -2.74  | 3.05E-02 | -2.64  | 5.99E-02 | 4.86  | 7.30E-04 | EGA4-3 |
| ENSMMUG00000003569  | ARRDC3    | Arrestin Domain Containing 3                                     | 1.90  | 3.88  | 0.97 | 4.55  | -5.09  | 1.58E-03 | 2.17   | 2.33E-01 | 4.36  | 3.72E-02 | EGA4-3 |
| ENSMMUG00000001948  | FBXL21    | F-box And Leucine Rich Repeat Protein 21                         | 1.13  | 0.00  | 0.01 | 0.82  | -7.49  | 3.30E-08 | 0.26   | 9.21E-01 | 3.96  | 4.80E-02 | EGA4-3 |
| ENSMMUG00000013715  | PAQR8     | Progesterin And AdipoQ Receptor Family Member 8                  | 3.96  | 0.45  | 1.62 | 1.88  | -4.10  | 1.61E-03 | 0.58   | 7.49E-01 | 3.44  | 4.42E-02 | EGA4-3 |
| ENSMMUG00000008684  | GCLC      | Glutamate-cysteine Ligase Catalytic Subunit                      | 4.44  | 1.11  | 2.09 | 15.13 | -1.89  | 4.34E-02 | -0.36  | 7.70E-01 | 4.77  | 3.37E-07 | EGA4-3 |
| ENSMMUG00000004829  | BCKDHB    | Branched Chain Keto Acid Dehydrogenase E1 Subunit Beta           | 10.12 | 0.54  | 1.49 | 7.19  | -5.48  | 6.26E-06 | 0.23   | 9.08E-01 | 4.16  | 7.25E-03 | EGA4-3 |
| ENSMMUG00000019450  |           |                                                                  | 10.16 | 4.79  | 5.62 | 7.36  | -1.84  | 1.13E-02 | -0.68  | 4.25E-01 | 2.12  | 1.74E-02 | EGA4-3 |
| ENSMMUG00000048195  |           |                                                                  | 0.39  | 0.11  | 0.38 | 1.99  | -3.42  | 1.78E-02 | 1.16   | 5.12E-01 | 4.02  | 2.13E-02 | EGA4-3 |
| ENSMMUG00000013782  | LAMA4     | Laminin Subunit Alpha 4                                          | 0.26  | 0.16  | 0.72 | 4.69  | -3.78  | 6.05E-03 | -1.78  | 2.80E-01 | 9.89  | 7.03E-13 | EGA4-3 |
| ENSMMUG00000003544  | LACTB     | Lactamase Beta                                                   | 0.70  | 0.21  | 0.76 | 1.47  | -3.37  | 1.29E-03 | 2.13   | 5.43E-02 | 3.00  | 2.46E-02 | EGA4-3 |

|                     |           |                                                                              |       |       |       |       |       |          |       |          |      |          |        |
|---------------------|-----------|------------------------------------------------------------------------------|-------|-------|-------|-------|-------|----------|-------|----------|------|----------|--------|
| ENSMMUG00000015085  | THAP10    | THAP Domain Containing 10                                                    | 1.42  | 0.01  | 0.06  | 0.70  | -7.50 | 3.06E-08 | 2.42  | 1.35E-01 | 4.56 | 1.04E-02 | EGA4-3 |
| ENSMMUG00000043001  | MFGE8     | Milk Fat Globule-EGF Factor 8 Protein                                        | 11.14 | 2.29  | 3.83  | 30.26 | -2.85 | 6.27E-03 | 0.32  | 8.34E-01 | 3.24 | 1.04E-02 | EGA4-3 |
| ENSMMUG00000029504  | GDPGP1    | GDP-D-glucose Phosphorylase 1                                                | 1.41  | 0.20  | 0.67  | 1.45  | -4.67 | 3.43E-03 | 1.67  | 3.84E-01 | 5.06 | 1.07E-02 | EGA4-3 |
| ENSMMUG00000005108  | RCCD1     | RCC1 Domain Containing 1                                                     | 0.85  | 0.21  | 0.16  | 1.03  | -6.07 | 9.39E-04 | 1.14  | 6.46E-01 | 6.03 | 1.05E-02 | EGA4-3 |
| ENSMMUG00000017261  | GALC      | Galactosylceramidase                                                         | 1.66  | 0.54  | 1.01  | 5.87  | -2.80 | 6.95E-03 | 0.54  | 6.98E-01 | 3.96 | 8.48E-04 | EGA4-3 |
| ENSMMUG00000018687  | CD99      | CD99 Molecule (Xg Blood Group)                                               | 8.43  | 2.96  | 11.03 | 30.57 | -2.80 | 3.28E-03 | 1.24  | 2.48E-01 | 3.13 | 6.38E-03 | EGA4-3 |
| ENSMMUG00000003082  | PAGE4     | PAGE Family Member 4                                                         | 0.79  | 0.03  | 6.30  | 3.25  | -6.16 | 1.35E-02 | 0.76  | 8.35E-01 | 7.39 | 1.16E-02 | EGA4-3 |
| ENSMMUG00000023056  | CLCN5     | Chloride Voltage-gated Channel 5                                             | 16.42 | 2.30  | 3.99  | 9.93  | -2.45 | 7.07E-04 | -0.02 | 9.84E-01 | 2.40 | 7.39E-03 | EGA4-3 |
| ENSMMUG000000023604 | ARMCX1    | Armadillo Repeat Containing, X-linked 1                                      | 0.62  | 0.19  | 0.50  | 3.56  | -3.38 | 3.56E-02 | 1.54  | 4.01E-01 | 4.48 | 1.84E-02 | EGA4-3 |
| ENSMMUG00000000809  | PLP1      | Proteolipid Protein 1                                                        | 3.42  | 0.18  | 0.55  | 2.95  | -4.45 | 1.17E-03 | -0.64 | 7.39E-01 | 4.99 | 1.91E-03 | EGA4-3 |
| ENSMMUG00000005501  |           |                                                                              | 1.86  | 0.82  | 7.02  | 16.60 | -2.87 | 3.00E-02 | 1.25  | 4.08E-01 | 6.89 | 6.68E-07 | EGA4-3 |
| ENSMMUG00000009481  | TMLHE     | Trimethyllysine Hydroxylase, Epsilon                                         | 0.50  | 0.23  | 0.49  | 1.04  | -3.90 | 1.22E-02 | 2.15  | 2.06E-01 | 4.21 | 3.78E-02 | EGA4-3 |
| ENSMMUG00000043506  | TDRP      | Testis Development Related Protein                                           | 35.51 | 1.81  | 5.66  | 7.47  | -4.51 | 2.53E-08 | -1.46 | 1.27E-01 | 3.53 | 4.78E-04 | EGA4-3 |
| ENSMMUG00000019212  | CTSB      | Cathepsin B                                                                  | 41.94 | 10.39 | 34.89 | ##### | -1.82 | 3.73E-02 | 1.37  | 1.29E-01 | 3.41 | 2.75E-04 | EGA4-3 |
| ENSMMUG00000003217  | TM7SF3    | Transmembrane 7 Superfamily Member 3                                         | 3.96  | 0.39  | 0.75  | 2.60  | -3.52 | 7.00E-03 | -1.53 | 3.33E-01 | 4.11 | 1.65E-02 | EGA4-3 |
| ENSMMUG00000042265  | THAP2     | THAP Domain Containing 2                                                     | 0.92  | 0.37  | 0.14  | 0.18  | -3.65 | 2.20E-02 | -2.61 | 1.22E-01 | 4.69 | 2.02E-02 | EGA4-3 |
| ENSMMUG00000010236  | WSB2      | WD Repeat And SOCS Box Containing 2                                          | 9.43  | 3.32  | 4.11  | 8.78  | -3.00 | 5.85E-05 | 0.61  | 5.27E-01 | 3.00 | 7.29E-04 | EGA4-3 |
| ENSMMUG00000017115  | IDI1      | Isopentenyl-diphosphate Delta Isomerase 1                                    | 4.44  | 1.40  | 3.42  | 10.65 | -2.62 | 4.90E-03 | 1.09  | 3.08E-01 | 2.59 | 2.81E-02 | EGA4-3 |
| ENSMMUG00000015034  | PIP4K2A   | Phosphatidylinositol-5-phosphate 4-kinase Type 2 Alpha                       | 17.28 | 2.90  | 3.34  | 8.78  | -2.44 | 4.28E-04 | -0.16 | 8.82E-01 | 2.12 | 1.68E-02 | EGA4-3 |
| ENSMMUG00000015405  |           |                                                                              | 2.96  | 0.46  | 0.49  | 1.29  | -5.96 | 4.32E-06 | 0.67  | 7.27E-01 | 5.36 | 1.73E-03 | EGA4-3 |
| ENSMMUG00000020402  | MCU       | Mitochondrial Calcium Uniporter Family With Sequence Similarity 241 Member B | 4.47  | 0.65  | 3.64  | 8.42  | -2.19 | 3.48E-02 | 1.03  | 3.80E-01 | 2.65 | 4.06E-02 | EGA4-3 |
| ENSMMUG00000016240  | FAM241B   |                                                                              | 4.51  | 0.13  | 0.50  | 1.16  | -4.62 | 1.25E-04 | 0.88  | 5.79E-01 | 3.54 | 2.87E-02 | EGA4-3 |
| ENSMMUG00000022598  |           |                                                                              | 4.20  | 0.67  | 0.89  | 4.46  | -2.84 | 2.95E-02 | -2.18 | 1.14E-01 | 4.66 | 1.53E-03 | EGA4-3 |
| ENSMMUG00000015148  | RAB3IL1   | RAB3A Interacting Protein Like 1                                             | 0.24  | 0.09  | 0.50  | 3.82  | -4.37 | 9.32E-03 | 1.46  | 4.75E-01 | 9.12 | 1.57E-07 | EGA4-3 |
| ENSMMUG00000040741  | TMX2      | Thioredoxin Related Transmembrane Protein 2                                  | 18.21 | 2.45  | 8.94  | 23.35 | -4.15 | 1.83E-08 | 1.32  | 1.24E-01 | 2.46 | 1.13E-02 | EGA4-3 |
| ENSMMUG00000020953  | MICAL2    | Microtubule Associated Monooxygenase, Calponin And LIM Domain Containing 2   | 1.39  | 0.13  | 0.16  | 0.44  | -4.15 | 1.75E-03 | -1.74 | 2.90E-01 | 3.99 | 2.21E-02 | EGA4-3 |
| ENSMMUG00000019751  | PPFIBP2   | PPFIA Binding Protein 2                                                      | 4.64  | 1.31  | 1.63  | 5.41  | -2.03 | 4.51E-02 | -1.04 | 3.54E-01 | 2.77 | 2.30E-02 | EGA4-3 |
| ENSMMUG00000007675  | SERPINH1  | Serpin Family H Member 1                                                     | 2.61  | 0.62  | 1.52  | 17.31 | -5.10 | 4.81E-05 | -0.63 | 7.35E-01 | 9.49 | 1.04E-12 | EGA4-3 |
| ENSMMUG00000022139  | CTSC      | Cathepsin C                                                                  | 2.60  | 0.13  | 0.24  | 1.36  | -6.01 | 2.66E-06 | 0.30  | 8.83E-01 | 3.73 | 2.96E-02 | EGA4-3 |
| ENSMMUG00000000796  | KDEL2     | KDEL Motif Containing 2                                                      | 4.00  | 0.70  | 0.47  | 6.89  | -3.65 | 2.48E-03 | -2.17 | 1.01E-01 | 5.39 | 6.01E-05 | EGA4-3 |
| ENSMMUG00000020491  | VWA5A     | Von Willebrand Factor A Domain Containing 5A                                 | 0.42  | 0.03  | 1.17  | 2.49  | -5.64 | 1.14E-03 | 3.64  | 5.50E-02 | 4.84 | 1.68E-02 | EGA4-3 |
| ENSMMUG00000008829  | TFCP2L1   | Transcription Factor CP2 Like 1                                              | 2.96  | 1.00  | 4.87  | 32.51 | -2.46 | 3.41E-02 | 1.43  | 2.58E-01 | 3.23 | 2.00E-02 | EGA4-3 |
| ENSMMUG00000017180  | FRMD3     | FERM Domain Containing 3                                                     | 2.01  | 0.88  | 0.37  | 0.23  | -3.66 | 9.26E-03 | -2.01 | 1.91E-01 | 4.29 | 1.31E-02 | EGA4-3 |
| ENSMMUG00000039871  |           |                                                                              | 7.15  | 2.09  | 1.51  | 3.39  | -2.38 | 2.61E-02 | -1.95 | 7.37E-02 | 2.68 | 4.78E-02 | EGA4-3 |
| ENSMMUG00000014464  | FOSL2     | FOS Like 2, AP-1 Transcription Factor Subunit                                | 1.79  | 1.70  | 1.84  | 4.34  | -3.08 | 2.30E-02 | 0.78  | 6.46E-01 | 4.36 | 4.34E-03 | EGA4-3 |
| ENSMMUG00000008770  | UGP2      | UDP-glucose Pyrophosphorylase 2                                              | 22.13 | 6.33  | 6.72  | 12.98 | -1.62 | 3.46E-02 | -0.27 | 7.95E-01 | 2.08 | 2.57E-02 | EGA4-3 |
| ENSMMUG00000030785  | VAMP8     | Vesicle Associated Membrane Protein 8                                        | 3.37  | 0.38  | 0.74  | 5.69  | -5.10 | 2.37E-03 | 0.35  | 8.91E-01 | 5.61 | 4.42E-03 | EGA4-3 |
| ENSMMUG00000037501  |           |                                                                              | 6.32  | 1.57  | 0.56  | 2.47  | -3.02 | 2.82E-03 | -1.24 | 3.10E-01 | 3.06 | 2.86E-02 | EGA4-3 |
| ENSMMUG00000012297  | PARP4     | Poly(ADP-ribose) Polymerase Family Member 4                                  | 5.67  | 0.57  | 1.71  | 12.36 | -3.85 | 2.22E-06 | 1.09  | 2.68E-01 | 3.48 | 3.34E-04 | EGA4-3 |
| ENSMMUG00000021370  |           |                                                                              | 2.08  | 0.02  | 2.52  | 2.97  | -7.31 | 9.93E-06 | 2.56  | 1.90E-01 | 4.43 | 3.98E-02 | EGA4-3 |
| ENSMMUG00000006495  | PEMT      | Phosphatidylethanolamine N-methyltransferase                                 | 0.91  | 0.55  | 2.46  | 6.22  | -4.15 | 1.06E-02 | 1.55  | 4.17E-01 | 5.64 | 1.79E-03 | EGA4-3 |
| ENSMMUG00000006847  | RDM1      | RAD52 Motif Containing 1                                                     | 4.21  | 0.55  | 6.18  | 10.81 | -3.50 | 7.00E-03 | 1.40  | 3.60E-01 | 3.58 | 2.95E-02 | EGA4-3 |
| ENSMMUG00000019039  | OSBPL3    | Oxysterol Binding Protein Like 7                                             | 1.55  | 0.19  | 0.41  | 4.77  | -3.32 | 4.96E-03 | 0.30  | 8.67E-01 | 3.48 | 1.83E-02 | EGA4-3 |
| ENSMMUG00000013056  | NT5C3B    | 5'-nucleotidase, Cytosolic IIIB                                              | 5.25  | 2.72  | 4.67  | 4.30  | -4.41 | 1.24E-03 | 0.42  | 8.36E-01 | 4.51 | 6.89E-03 | EGA4-3 |
| ENSMMUG00000010373  | LOC702286 | Metallothionein 1F-like                                                      | 0.62  | 0.43  | 1.01  | 6.73  | -4.72 | 1.68E-02 | 1.58  | 5.09E-01 | 5.50 | 1.93E-02 | EGA4-3 |
| ENSMMUG00000010374  |           |                                                                              | 23.19 | 5.27  | 6.06  | 19.87 | -2.55 | 2.29E-02 | -0.58 | 6.99E-01 | 3.11 | 2.67E-02 | EGA4-3 |
| ENSMMUG00000004321  | LAMA3     | Laminin Subunit Alpha 3                                                      | 0.52  | 0.28  | 0.74  | 4.69  | -2.66 | 5.80E-03 | 0.82  | 4.80E-01 | 4.80 | 2.16E-06 | EGA4-3 |

|                    |            |                                                                    |       |       |       |       |       |          |        |          |       |          |        |
|--------------------|------------|--------------------------------------------------------------------|-------|-------|-------|-------|-------|----------|--------|----------|-------|----------|--------|
| ENSMMUG00000011037 | SLC14A1    | Solute Carrier Family 14 Member 1 (Kidd Blood Group)               | 1.74  | 0.09  | 0.10  | 0.68  | -6.06 | 4.67E-06 | -0.60  | 7.67E-01 | 4.64  | 7.64E-03 | EGA4-3 |
| ENSMMUG00000048128 | HSBP1L1    | Heat Shock Factor Binding Protein 1 Like 1                         | 1.04  | 0.17  | 0.21  | 8.72  | -2.81 | 1.84E-02 | 1.29   | 3.79E-01 | 7.35  | 3.66E-10 | EGA4-3 |
| ENSMMUG00000022908 | WLS        | Wntless Wnt Ligand Secretion Mediator                              | 96.49 | 24.64 | 7.26  | 11.79 | -1.87 | 4.13E-02 | -4.53  | 3.74E-08 | 3.04  | 3.29E-03 | EGA4-4 |
| ENSMMUG00000021078 | ATP1B1     | ATPase Na <sup>+</sup> /K <sup>+</sup> Transporting Subunit Beta 1 | ##### | 68.58 | 32.59 | ##### | -1.90 | 1.55E-02 | -1.79  | 2.19E-02 | 2.55  | 5.61E-03 | EGA4-4 |
| ENSMMUG00000012605 | SLCO2A1    | Solute Carrier Organic Anion Transporter Family Member 2A1         | 3.77  | 4.19  | 1.21  | 4.67  | -2.64 | 2.88E-02 | -4.85  | 1.47E-04 | 5.19  | 1.49E-04 | EGA4-4 |
| ENSMMUG00000007365 | PALLD      | Palladin, Cytoskeletal Associated Protein                          | 35.30 | 8.45  | 3.63  | 21.76 | -2.13 | 7.55E-03 | -2.49  | 1.36E-03 | 3.48  | 6.07E-05 | EGA4-4 |
| ENSMMUG00000004257 | BACE2      | Beta-site APP-cleaving Enzyme 2                                    | 6.04  | 0.63  | 0.47  | 0.45  | -4.29 | 3.72E-03 | -4.59  | 3.18E-03 | 4.21  | 3.20E-02 | EGA4-4 |
| ENSMMUG00000002936 | GMPT       | Guanosine Monophosphate Reductase                                  | 38.70 | 1.84  | 1.22  | 5.55  | -4.58 | 5.08E-07 | -2.68  | 7.69E-03 | 3.15  | 8.36E-03 | EGA4-4 |
| ENSMMUG00000018201 | NID2       | Nidogen 2                                                          | 21.63 | 7.39  | 5.55  | 76.83 | -2.05 | 3.46E-02 | -1.97  | 4.13E-02 | 4.57  | 4.40E-06 | EGA4-4 |
| ENSMMUG00000006855 | ACOT2      | Acyl-CoA Thioesterase 2                                            | 6.46  | 2.82  | 0.53  | 2.10  | -2.19 | 4.96E-02 | -2.57  | 1.66E-02 | 2.80  | 4.18E-02 | EGA4-4 |
| ENSMMUG00000014048 | ACE2       | Angiotensin I Converting Enzyme (peptidyl-dipeptidase A) 2         | 65.09 | 17.23 | 2.55  | 14.17 | -2.05 | 3.00E-02 | -4.46  | 2.31E-07 | 4.24  | 2.02E-05 | EGA4-4 |
| ENSMMUG00000013135 | SRPX       | Sushi Repeat Containing Protein, X-linked                          | 6.41  | 0.82  | 0.48  | 1.18  | -3.01 | 9.15E-03 | -2.99  | 1.38E-02 | 3.54  | 1.97E-02 | EGA4-4 |
| ENSMMUG00000047938 |            |                                                                    | 3.19  | 0.34  | 1.17  | 0.03  | -6.02 | 2.51E-02 | -21.57 | 5.07E-18 | ##### | 4.68E-15 | EGA4-4 |
| ENSMMUG00000009663 | C9H10orf90 | Chromosome 9 Open Reading Frame, Human C10orf90                    | 5.34  | 1.33  | 2.27  | 13.28 | -2.43 | 8.91E-03 | -2.15  | 2.35E-02 | 4.56  | 3.47E-06 | EGA4-4 |
| ENSMMUG00000000513 | OSBPL5     | Oxysterol Binding Protein Like 5                                   | 10.79 | 4.44  | 0.23  | 3.33  | -2.52 | 2.07E-02 | -4.98  | 2.52E-06 | 3.68  | 4.87E-03 | EGA4-4 |
| ENSMMUG00000006336 |            |                                                                    | 7.50  | 0.54  | 0.15  | 1.14  | -3.96 | 2.64E-03 | -4.73  | 1.80E-03 | 5.71  | 5.21E-04 | EGA4-4 |
| ENSMMUG00000030838 | GTF2A1L    | General Transcription Factor IIA Subunit 1 Like                    | 7.76  | 1.01  | 0.51  | 2.64  | -2.72 | 8.67E-03 | -2.50  | 1.72E-02 | 4.13  | 4.05E-04 | EGA4-4 |
| ENSMMUG00000000857 | ANXA4      | Annexin A4                                                         | 6.50  | 0.64  | 0.19  | 2.39  | -3.92 | 1.55E-04 | -3.29  | 2.64E-03 | 5.34  | 5.56E-06 | EGA4-4 |
| ENSMMUG00000013749 | FERMT1     | Fermitin Family Member 1                                           | 0.71  | 0.30  | 0.17  | 1.59  | -3.17 | 3.76E-02 | -3.54  | 2.81E-02 | 5.09  | 5.04E-03 | EGA4-4 |
| ENSMMUG00000041755 |            |                                                                    | 1.43  | 0.02  | 0.00  | 0.07  | -6.45 | 2.91E-03 | -7.26  | 1.72E-03 | 7.17  | 9.17E-03 | EGA4-4 |
| ENSMMUG00000001538 | GRAMD1A    | GRAM Domain Containing 1A                                          | 1.51  | 0.49  | 0.42  | 3.33  | -2.49 | 2.95E-02 | -2.92  | 1.36E-02 | 6.29  | 2.06E-07 | EGA4-4 |

a) FPKM: Fragments Per Kilobase of transcript per Million mapped reads.

b) L2FC: Log fold change of base 2.

c) FDR: False discovery rate. Adjusted p-value using the Benjamin-Hochberg method.
