# Supplementary material
Source: PubMed Central journal article supplement (PMC6417155)
Supplement: gaz001_schall_et_al._table_s7.pdf [file gaz001_schall_et_al._table_s7.pdf]

Table S7 - BL-Down super-group DEGs

| Ensembl ID          | Symbol    | GeneName                                               | FPKM <sup>a</sup> |       |        |            | MII:8-Cell        |                  | 8-Cell:Morula |          | Morula:Blast |          | Sub-Group |
|---------------------|-----------|--------------------------------------------------------|-------------------|-------|--------|------------|-------------------|------------------|---------------|----------|--------------|----------|-----------|
|                     |           |                                                        | MI                | 8Cell | Morula | Exp. Blast | L2FC <sup>b</sup> | FDR <sup>c</sup> | L2FC          | FDR      | L2FC         | FDR      |           |
| ENSMMUG00000020432  | OSCP1     | Organic Solute Carrier Partner 1                       | 2.53              | 2.61  | 3.12   | 0.25       | 0.49              | 7.14E-01         | -0.16         | 9.17E-01 | -4.45        | 8.18E-05 | BL-Down-1 |
| ENSMMUG00000010328  | MEAF6     | MYST/Esa1 Associated Factor 6                          | 19.31             | 10.74 | 15.61  | 8.46       | -0.98             | 1.30E-01         | 0.75          | 2.62E-01 | -1.64        | 2.95E-02 | BL-Down-1 |
| ENSMMUG00000011645  | DMAP1     | DNA Methyltransferase 1 Associated Protein 1           | 8.59              | 21.11 | 12.35  | 5.55       | 0.14              | 9.34E-01         | -0.99         | 4.31E-01 | -2.85        | 3.50E-02 | BL-Down-1 |
| ENSMMUG00000007182  | LRRC42    | Leucine Rich Repeat Containing 42                      | 38.98             | 21.02 | 12.24  | 4.58       | -0.89             | 2.03E-01         | -0.62         | 4.04E-01 | -1.86        | 1.82E-02 | BL-Down-1 |
| ENSMMUG00000013679  | ACOT11    | Acyl-CoA Thioesterase 11                               | 0.15              | 1.87  | 1.02   | 0.06       | 0.57              | 7.59E-01         | 0.16          | 9.41E-01 | -4.15        | 1.59E-02 | BL-Down-1 |
| ENSMMUG00000006754  | TTC4      | Tetratricopeptide Repeat Domain 4                      | 8.52              | 9.59  | 13.25  | 2.32       | -0.28             | 8.22E-01         | 1.51          | 1.02E-01 | -3.35        | 7.63E-04 | BL-Down-1 |
| ENSMMUG00000008003  | LRRC8C    | Leucine Rich Repeat Containing 8 VRAC Subunit C        | 0.71              | 0.35  | 1.31   | 0.05       | -0.58             | 7.89E-01         | 2.24          | 1.84E-01 | -6.04        | 8.63E-04 | BL-Down-1 |
| ENSMMUG00000005815  | ATXN7L2   | Ataxin 7 Like 2                                        | 0.76              | 5.22  | 1.57   | 0.25       | 1.25              | 4.36E-01         | -2.26         | 1.15E-01 | -3.94        | 1.99E-02 | BL-Down-1 |
| ENSMMUG00000013681  | PLEKHO1   | Pleckstrin Homology Domain Containing O1               | 2.85              | 4.43  | 2.99   | 0.30       | 0.81              | 5.65E-01         | -1.29         | 3.22E-01 | -4.57        | 4.78E-04 | BL-Down-1 |
| ENSMMUG00000019514  | UAP1      | UDP-N-acetylglucosamine Pyrophosphorylase 1            | 19.65             | 27.03 | 31.34  | 12.55      | 0.45              | 5.17E-01         | 0.19          | 8.09E-01 | -1.69        | 1.43E-02 | BL-Down-1 |
| ENSMMUG00000012227  | WDR26     | WD Repeat Domain 26                                    | 88.99             | 48.89 | 39.58  | 16.54      | -0.95             | 1.08E-01         | -0.48         | 4.62E-01 | -1.51        | 2.95E-02 | BL-Down-1 |
| ENSMMUG00000016925  | LAMB3     | Laminin Subunit Beta 3                                 | 0.91              | 1.55  | 0.53   | 0.04       | -0.56             | 8.03E-01         | -2.06         | 2.60E-01 | -4.29        | 4.35E-02 | BL-Down-1 |
| ENSMMUG0000001024   | ELK4      | ELK4, ETS Transcription Factor                         | 45.18             | 75.04 | 41.46  | 17.58      | 0.71              | 2.28E-01         | -0.63         | 2.88E-01 | -1.39        | 3.87E-02 | BL-Down-1 |
| ENSMMUG00000012615  | PCNX2     | Pecanex Homolog 2                                      | 0.69              | 2.38  | 0.51   | 0.13       | 1.22              | 3.54E-01         | -1.59         | 2.03E-01 | -3.38        | 1.97E-02 | BL-Down-1 |
| ENSMMUG00000023311  | ZNF669    | Zinc Finger Protein 669                                | 9.54              | 18.97 | 18.17  | 5.64       | 1.09              | 9.46E-02         | 0.04          | 9.66E-01 | -1.75        | 2.16E-02 | BL-Down-1 |
| ENSMMUG00000038349  | ARL6      | ADP Ribosylation Factor Like GTPase 6                  | 6.62              | 2.51  | 1.51   | 0.42       | -1.91             | 5.14E-02         | -0.70         | 5.45E-01 | -2.44        | 4.83E-02 | BL-Down-1 |
| ENSMMUG00000020641  | ZBTB20    | Zinc Finger And BTB Domain Containing 20               | 0.92              | 0.71  | 2.27   | 0.08       | 0.37              | 8.96E-01         | 0.57          | 8.27E-01 | -5.52        | 2.13E-02 | BL-Down-1 |
| ENSMMUG00000008810  | ARL8B     | ADP Ribosylation Factor Like GTPase 8B                 | 31.08             | 61.46 | 81.10  | 24.62      | 0.75              | 2.46E-01         | 0.72          | 2.64E-01 | -1.68        | 1.76E-02 | BL-Down-1 |
| ENSMMUG000000021899 | SEC62     | SEC62 Homolog, Preprotein Translocation Factor         | 33.96             | 33.28 | 45.07  | 14.38      | -0.17             | 8.27E-01         | 0.60          | 3.43E-01 | -1.46        | 4.17E-02 | BL-Down-1 |
| ENSMMUG00000016029  | SLC4A4    | Solute Carrier Family 4 Member 4                       | 1.57              | 3.05  | 1.52   | 0.11       | -0.51             | 7.69E-01         | 0.57          | 7.37E-01 | -5.21        | 2.02E-04 | BL-Down-1 |
| ENSMMUG00000045445  | #N/A      | NANA                                                   | 0.78              | 3.58  | 5.55   | 0.02       | -1.62             | 4.30E-01         | -0.28         | 9.17E-01 | -7.35        | 2.27E-04 | BL-Down-1 |
| ENSMMUG00000021347  | LARP1B    | La Ribonucleoprotein Domain Family Member 1B           | 8.50              | 18.38 | 23.00  | 9.72       | 1.07              | 5.33E-02         | 0.53          | 3.86E-01 | -1.48        | 2.52E-02 | BL-Down-1 |
| ENSMMUG00000003634  | DDX60L    | DEXD/H-box 60 Like                                     | 2.18              | 2.37  | 2.97   | 0.10       | -0.61             | 6.38E-01         | -1.66         | 1.26E-01 | -3.77        | 1.89E-03 | BL-Down-1 |
| ENSMMUG00000004258  | FAM3B     | Family With Sequence Similarity 3 Member B             | 1.42              | 4.83  | 1.17   | 0.21       | 0.42              | 8.50E-01         | -0.24         | 9.19E-01 | -4.25        | 3.77E-02 | BL-Down-1 |
| ENSMMUG00000037624  | ISPD      | Isoprenoid Synthase Domain Containing                  | 35.64             | 70.82 | 41.04  | 7.75       | 1.00              | 2.04E-01         | -0.84         | 2.97E-01 | -2.55        | 1.90E-03 | BL-Down-1 |
| ENSMMUG00000003572  | NAMPT     | Nicotinamide Phosphoribosyltransferase                 | 9.70              | 11.33 | 10.07  | 3.12       | 0.02              | 9.85E-01         | -0.20         | 8.38E-01 | -1.82        | 3.87E-02 | BL-Down-1 |
| ENSMMUG00000040186  | PRSS2     | Protease, Serine, 2 (trypsin 2)                        | 1.21              | 0.48  | 0.90   | 0.00       | -4.63             | 1.22E-01         | -2.03         | 5.78E-01 | -18.96       | 7.81E-11 | BL-Down-1 |
| ENSMMUG00000013084  | HTR5A     | 5-hydroxytryptamine Receptor 5A                        | 6.65              | 3.03  | 1.40   | 0.08       | -2.20             | 1.96E-01         | 0.30          | 9.00E-01 | -4.89        | 2.01E-02 | BL-Down-1 |
| ENSMMUG00000005023  | CCDC112   | Coiled-coil Domain Containing 112                      | 2.65              | 3.31  | 2.09   | 0.74       | 0.41              | 6.39E-01         | -0.17         | 8.64E-01 | -2.69        | 4.55E-04 | BL-Down-1 |
| ENSMMUG00000003280  | HBEGF     | Heparin Binding EGF Like Growth Factor                 | 2.91              | 1.03  | 1.21   | 0.09       | -2.40             | 5.40E-02         | 0.29          | 8.72E-01 | -3.32        | 4.60E-02 | BL-Down-1 |
| ENSMMUG00000000419  | ARHGAP26  | Rho GTPase Activating Protein 26                       | 30.33             | 23.68 | 12.18  | 2.28       | -1.04             | 3.03E-01         | -0.28         | 8.24E-01 | -2.30        | 4.21E-02 | BL-Down-1 |
| ENSMMUG00000007075  | #N/A      | NANA                                                   | 3.49              | 8.25  | 3.97   | 0.33       | -0.21             | 9.45E-01         | -1.56         | 5.19E-01 | -6.18        | 1.30E-02 | BL-Down-1 |
| ENSMMUG00000014691  | ID4       | Inhibitor Of DNA Binding 4, HLH Protein                | 2.60              | 5.18  | 5.28   | 0.29       | 1.09              | 4.72E-01         | 0.44          | 8.03E-01 | -3.42        | 3.78E-02 | BL-Down-1 |
| ENSMMUG00000012870  | HDGFL1    | HDGF Like 1                                            | 4.78              | 6.18  | 6.57   | 0.26       | -0.92             | 6.36E-01         | -2.10         | 2.14E-01 | -5.17        | 5.88E-03 | BL-Down-1 |
| ENSMMUG00000039988  | HIST1H2AA | Histone Cluster 1, H2aa                                | 7.82              | 11.53 | 13.48  | 1.52       | -2.20             | 2.08E-01         | 0.22          | 9.31E-01 | -5.02        | 1.51E-02 | BL-Down-1 |
| ENSMMUG00000008993  | KCNK5     | Potassium Two Pore Domain Channel Subfamily K Member 5 | 3.34              | 2.61  | 3.68   | 0.67       | -1.23             | 2.02E-01         | 1.58          | 8.31E-02 | -3.53        | 2.87E-04 | BL-Down-1 |
| ENSMMUG00000011567  | ZNF318    | Zinc Finger Protein 318                                | 8.95              | 12.78 | 13.28  | 7.69       | 0.11              | 8.97E-01         | 0.11          | 8.88E-01 | -1.41        | 4.16E-02 | BL-Down-1 |

|                    |              |                                                            |       |       |        |       |       |          |       |          |       |          |           |
|--------------------|--------------|------------------------------------------------------------|-------|-------|--------|-------|-------|----------|-------|----------|-------|----------|-----------|
| ENSMMUG00000012781 | MLIP         | Muscular LMNA Interacting Protein                          | 1.11  | 1.28  | 0.39   | 0.02  | -1.95 | 2.59E-01 | -0.14 | 9.54E-01 | -4.34 | 3.33E-02 | BL-Down-1 |
| ENSMMUG00000009856 | GRIK2        | Glutamate Ionotropic Receptor Kainate Type Subunit 2       | 1.05  | 0.84  | 0.49   | 0.05  | -0.59 | 7.29E-01 | -1.68 | 2.39E-01 | -4.05 | 1.57E-02 | BL-Down-1 |
| ENSMMUG00000018346 | CCDC170      | Coiled-coil Domain Containing 170                          | 14.79 | 6.91  | 1.48   | 0.07  | -1.12 | 4.20E-01 | -2.32 | 6.11E-02 | -3.39 | 3.79E-02 | BL-Down-1 |
| ENSMMUG00000023554 | GABRA5       | Gamma-aminobutyric Acid Type A Receptor Alpha5 Subunit     | 25.42 | 10.46 | 6.37   | 3.16  | -1.04 | 2.11E-01 | -0.81 | 3.46E-01 | -2.86 | 8.12E-04 | BL-Down-1 |
| ENSMMUG00000037623 | LOC100424874 | Golgin Subfamily A Member 6-like Protein 22                | 2.10  | 4.50  | 3.77   | 0.19  | 0.95  | 5.94E-01 | -0.14 | 9.50E-01 | -4.68 | 6.32E-03 | BL-Down-1 |
| ENSMMUG00000046799 | #N/A         | NANA                                                       | 9.21  | 9.04  | 6.02   | 0.14  | 1.11  | 3.89E-01 | -1.81 | 1.28E-01 | -5.30 | 2.76E-05 | BL-Down-1 |
| ENSMMUG00000020935 | SLC12A6      | Solute Carrier Family 12 Member 6                          | 27.39 | 17.46 | 14.04  | 4.36  | -0.76 | 2.53E-01 | 0.03  | 9.71E-01 | -1.90 | 6.89E-03 | BL-Down-1 |
| ENSMMUG00000014542 | CHAC1        | ChaC Glutathione Specific Gamma-glutamylcyclotransferase 1 | 2.54  | 1.25  | 7.34   | 0.42  | -1.69 | 3.55E-01 | 2.74  | 1.03E-01 | -8.83 | 4.07E-07 | BL-Down-1 |
| ENSMMUG00000012681 | NUSAP1       | Nucleolar And Spindle Associated Protein 1                 | 40.84 | 65.36 | 49.35  | 24.03 | 0.67  | 1.17E-01 | -0.32 | 5.01E-01 | -1.48 | 9.56E-04 | BL-Down-1 |
| ENSMMUG00000011510 | SLC30A4      | Solute Carrier Family 30 Member 4                          | 8.05  | 7.22  | 6.27   | 0.97  | -1.08 | 4.15E-01 | -0.89 | 5.16E-01 | -2.89 | 4.72E-02 | BL-Down-1 |
| ENSMMUG00000017374 | GNB5         | G Protein Subunit Beta 5                                   | 1.02  | 1.10  | 0.83   | 0.05  | -0.33 | 8.49E-01 | -0.59 | 7.10E-01 | -3.58 | 1.80E-02 | BL-Down-1 |
| ENSMMUG00000014005 | SNX1         | Sorting Nexin 1                                            | 11.08 | 11.77 | 4.90   | 1.84  | 0.43  | 6.47E-01 | -0.90 | 2.63E-01 | -2.05 | 2.28E-02 | BL-Down-1 |
| ENSMMUG00000022056 | DENND4A      | DENN Domain Containing 4A                                  | 20.64 | 10.15 | 5.18   | 2.55  | -1.07 | 5.81E-02 | -0.72 | 2.29E-01 | -1.49 | 2.96E-02 | BL-Down-1 |
| ENSMMUG00000001008 | SYNE2        | Spectrin Repeat Containing Nuclear Envelope Protein 2      | 11.72 | 8.15  | 6.26   | 1.95  | -0.58 | 3.84E-01 | -0.11 | 8.94E-01 | -1.48 | 4.30E-02 | BL-Down-1 |
| ENSMMUG00000012894 | NHS          | NHS Actin Remodeling Regulator                             | 1.41  | 0.99  | 0.45   | 0.02  | -1.70 | 2.51E-01 | 0.70  | 6.91E-01 | -6.88 | 4.89E-06 | BL-Down-1 |
| ENSMMUG00000018824 | ACOT9        | Acyl-CoA Thioesterase 9                                    | 10.00 | 7.86  | 8.52   | 0.55  | -0.35 | 7.77E-01 | 0.26  | 8.41E-01 | -3.74 | 2.21E-04 | BL-Down-1 |
| ENSMMUG00000043952 | #N/A         | NANA                                                       | 23.38 | 31.20 | 30.71  | 14.14 | 0.40  | 4.94E-01 | 0.13  | 8.56E-01 | -1.26 | 4.37E-02 | BL-Down-1 |
| ENSMMUG00000021581 | TAF7L        | TATA-box Binding Protein Associated Factor 7 Like          | 0.55  | 2.50  | 1.13   | 0.13  | 0.81  | 6.70E-01 | -0.09 | 9.68E-01 | -4.39 | 2.45E-02 | BL-Down-1 |
| ENSMMUG00000009037 | CUL4B        | Cullin 4B                                                  | 24.58 | 27.80 | 35.24  | 21.01 | -0.17 | 7.99E-01 | 0.71  | 1.70E-01 | -1.32 | 2.60E-02 | BL-Down-1 |
| ENSMMUG00000016648 | #N/A         | NANA                                                       | 1.14  | 0.80  | 2.52   | 0.35  | 0.15  | 9.39E-01 | 0.97  | 5.23E-01 | -4.76 | 9.89E-04 | BL-Down-1 |
| ENSMMUG00000009476 | #N/A         | NANA                                                       | 7.05  | 4.47  | 7.00   | 1.83  | -1.05 | 2.44E-01 | 1.35  | 1.13E-01 | -2.23 | 2.92E-02 | BL-Down-1 |
| ENSMMUG00000010137 | MCPH1        | Microcephalin 1                                            | 35.91 | 36.50 | 22.08  | 5.70  | -0.06 | 9.45E-01 | -0.62 | 3.22E-01 | -2.13 | 5.21E-04 | BL-Down-1 |
| ENSMMUG00000000639 | NEFM         | Neurofilament Medium                                       | 9.02  | 28.27 | 24.25  | 0.43  | 1.60  | 8.71E-02 | -1.04 | 2.94E-01 | -4.43 | 1.90E-06 | BL-Down-1 |
| ENSMMUG00000008028 | DOCK5        | Dedicator Of Cytokinesis 5                                 | 3.90  | 4.71  | 2.33   | 0.35  | 0.17  | 8.97E-01 | -1.29 | 1.62E-01 | -2.46 | 2.21E-02 | BL-Down-1 |
| ENSMMUG00000013193 | MMP16        | Matrix Metalloproteinase 16                                | 1.07  | 2.34  | 0.31   | 0.03  | -3.69 | 1.29E-01 | -1.66 | 5.63E-01 | -6.81 | 2.00E-02 | BL-Down-1 |
| ENSMMUG00000023778 | FBXO32       | F-box Protein 32                                           | 2.18  | 4.94  | 3.06   | 0.32  | 1.94  | 1.68E-01 | -0.30 | 8.75E-01 | -4.17 | 9.16E-03 | BL-Down-1 |
| ENSMMUG00000000375 | PLEKHG6      | Pleckstrin Homology And RhoGEF Domain Containing G6        | 1.72  | 0.75  | 0.95   | 0.08  | -3.01 | 7.22E-02 | 0.57  | 8.01E-01 | -4.25 | 4.02E-02 | BL-Down-1 |
| ENSMMUG00000022469 | YBX3         | Y-box Binding Protein 3                                    | 21.77 | 46.01 | 50.07  | 23.34 | 0.89  | 9.69E-02 | 0.45  | 4.48E-01 | -1.54 | 1.19E-02 | BL-Down-1 |
| ENSMMUG00000018013 | H2AFJ        | H2A Histone Family, Member J                               | 3.84  | 16.02 | 15.06  | 8.21  | 2.86  | 1.05E-01 | 1.53  | 4.11E-01 | -4.18 | 3.98E-02 | BL-Down-1 |
| ENSMMUG00000020431 | EPS8         | Epidermal Growth Factor Receptor Pathway Substrate 8       | 2.30  | 1.21  | 0.59   | 0.04  | -0.92 | 5.28E-01 | -1.05 | 4.64E-01 | -4.61 | 1.15E-03 | BL-Down-1 |
| ENSMMUG00000018385 | RASSF8       | Ras Association Domain Family Member 8                     | 33.85 | 42.96 | 46.11  | 20.95 | 0.35  | 5.86E-01 | 0.03  | 9.72E-01 | -1.34 | 3.87E-02 | BL-Down-1 |
| ENSMMUG00000015813 | OVCH1        | Ovochymase 1                                               | 18.46 | 11.94 | 2.70   | 0.20  | -1.71 | 9.86E-02 | -1.44 | 1.75E-01 | -3.56 | 2.06E-03 | BL-Down-1 |
| ENSMMUG00000023575 | KIAA1551     | KIAA1551 Ortholog                                          | 97.54 | ##### | 142.83 | 60.63 | 0.38  | 5.27E-01 | 0.29  | 6.39E-01 | -1.35 | 2.72E-02 | BL-Down-1 |
| ENSMMUG00000004895 | FAM186A      | Family With Sequence Similarity 186 Member A               | 0.39  | 0.98  | 1.67   | 0.02  | 1.06  | 6.04E-01 | -1.66 | 3.79E-01 | -4.69 | 2.56E-02 | BL-Down-1 |
| ENSMMUG00000008172 | LARP4        | La Ribonucleoprotein Domain Family Member 4                | 19.45 | 38.41 | 30.06  | 13.54 | 0.81  | 5.58E-02 | -0.28 | 5.78E-01 | -1.04 | 4.54E-02 | BL-Down-1 |
| ENSMMUG00000018901 | FGD6         | FYVE, RhoGEF And PH Domain Containing 6                    | 20.32 | 33.45 | 17.90  | 8.89  | 0.70  | 2.16E-01 | -0.78 | 1.56E-01 | -1.36 | 3.76E-02 | BL-Down-1 |
| ENSMMUG00000009213 | ZNF664       | Zinc Finger Protein 664                                    | 25.38 | 19.24 | 24.79  | 7.10  | -0.51 | 5.64E-01 | 0.71  | 3.95E-01 | -1.98 | 2.69E-02 | BL-Down-1 |
| ENSMMUG00000003925 | LOC100423924 | Coiled-coil Domain-containing Protein 7                    | 9.56  | 53.62 | 26.37  | 2.96  | 1.79  | 5.79E-02 | -1.42 | 1.40E-01 | -2.85 | 8.52E-03 | BL-Down-1 |
| ENSMMUG00000001619 | NOC3L        | NOC3 Like DNA Replication Regulator                        | 24.08 | 46.81 | 34.81  | 23.23 | 0.94  | 5.96E-02 | -0.16 | 8.07E-01 | -1.36 | 2.03E-02 | BL-Down-1 |
| ENSMMUG00000022617 | PDZD7        | PDZ Domain Containing 7                                    | 4.84  | 5.92  | 0.47   | 0.03  | -1.93 | 1.56E-01 | -2.12 | 1.23E-01 | -5.07 | 1.32E-03 | BL-Down-1 |

|                     |             |                                                       |       |       |        |       |       |          |       |          |        |          |           |
|---------------------|-------------|-------------------------------------------------------|-------|-------|--------|-------|-------|----------|-------|----------|--------|----------|-----------|
| ENSMMUG00000013033  | TACC2       | Transforming Acidic Coiled-coil Containing Protein 2  | 3.59  | 7.45  | 8.88   | 4.94  | 0.48  | 4.60E-01 | 0.75  | 2.08E-01 | -1.43  | 3.73E-02 | BL-Down-1 |
| ENSMMUG00000013526  | LOC697943   | Oocyte-secreted Protein 2                             | 6.45  | 3.22  | 1.83   | 0.11  | -0.67 | 6.47E-01 | -0.96 | 4.79E-01 | -3.82  | 6.02E-03 | BL-Down-1 |
| ENSMMUG00000021646  | NAT10       | N-acetyltransferase 10                                | 25.48 | 28.70 | 17.88  | 7.77  | 0.22  | 7.40E-01 | -0.66 | 2.21E-01 | -1.57  | 6.58E-03 | BL-Down-1 |
| ENSMMUG00000023490  | CCDC34      | Coiled-coil Domain Containing 34                      | 62.77 | ##### | 189.67 | 48.66 | 0.55  | 4.72E-01 | 1.25  | 5.66E-02 | -2.26  | 2.07E-03 | BL-Down-1 |
| ENSMMUG00000018178  | MYO7A       | Myosin VIIA                                           | 1.76  | 0.85  | 0.52   | 0.03  | -2.49 | 9.79E-02 | -0.87 | 6.28E-01 | -4.56  | 8.52E-03 | BL-Down-1 |
| ENSMMUG00000016737  | CNTN5       | Contactin 5                                           | 6.35  | 5.63  | 2.53   | 0.16  | -1.61 | 1.96E-01 | -0.35 | 8.30E-01 | -4.42  | 7.99E-04 | BL-Down-1 |
| ENSMMUG00000004157  | NPAT        | Nuclear Protein, Ataxia-telangiectasia Locus          | 30.00 | 18.62 | 20.28  | 8.87  | -0.71 | 5.18E-02 | 0.36  | 3.69E-01 | -1.51  | 7.35E-05 | BL-Down-1 |
| ENSMMUG00000021159  | LOC718034   | Tubulin Alpha-3 Chain                                 | 15.40 | 26.35 | 23.52  | 1.39  | 0.45  | 6.79E-01 | 0.50  | 6.37E-01 | -3.93  | 9.25E-06 | BL-Down-1 |
| ENSMMUG00000005397  | SMPD4       | Sphingomyelin Phosphodiesterase 4                     | 14.54 | 16.10 | 11.88  | 6.41  | 0.39  | 4.00E-01 | -0.48 | 2.72E-01 | -1.16  | 1.58E-02 | BL-Down-1 |
| ENSMMUG00000006215  | STK39       | Serine/threonine Kinase 39                            | 17.81 | 15.74 | 7.69   | 1.39  | -0.70 | 4.75E-01 | -0.35 | 7.54E-01 | -3.75  | 3.68E-05 | BL-Down-1 |
| ENSMMUG00000015842  | TRIP12      | Thyroid Hormone Receptor Interactor 12                | ##### | ##### | 106.63 | 28.12 | -0.14 | 8.11E-01 | 0.28  | 5.70E-01 | -2.39  | 2.11E-09 | BL-Down-1 |
| ENSMMUG00000012163  | GARNL3      | GTPase Activating Rap/RanGAP Domain Like 3            | 5.05  | 1.64  | 0.66   | 0.07  | -1.25 | 2.98E-01 | -2.07 | 5.98E-02 | -3.42  | 9.79E-03 | BL-Down-1 |
| ENSMMUG00000003671  | LHX2        | LIM Homeobox 2                                        | 3.90  | 1.84  | 12.21  | 0.14  | 0.04  | 9.86E-01 | 2.67  | 5.33E-02 | -7.46  | 4.80E-07 | BL-Down-1 |
| ENSMMUG00000011453  | LHX6        | LIM Homeobox 6                                        | 0.38  | 1.18  | 1.92   | 0.03  | 3.11  | 1.05E-01 | -2.46 | 2.20E-01 | -5.58  | 1.80E-02 | BL-Down-1 |
| ENSMMUG000000044793 | #N/A        | NANA                                                  | ##### | ##### | 290.62 | 62.35 | 0.37  | 5.85E-01 | -0.44 | 4.93E-01 | -1.89  | 2.35E-03 | BL-Down-1 |
| ENSMMUG00000013550  | LOC707552   | Myeloid-associated Differentiation Marker-like        | 0.18  | 0.78  | 3.23   | 0.08  | 1.08  | 6.62E-01 | 2.57  | 2.21E-01 | -6.25  | 7.44E-03 | BL-Down-1 |
| ENSMMUG00000030867  | GPATCH11    | G-patch Domain Containing 11                          | 55.42 | 53.96 | 51.30  | 7.04  | 0.82  | 3.29E-01 | -1.04 | 1.88E-01 | -2.19  | 1.40E-02 | BL-Down-1 |
| ENSMMUG00000003523  | RMND5A      | Required For Meiotic Nuclear Division 5 Homolog A     | 41.24 | 23.41 | 43.00  | 15.38 | -0.73 | 1.56E-01 | 0.60  | 2.52E-01 | -1.31  | 2.68E-02 | BL-Down-1 |
| ENSMMUG00000012863  | GPAT2       | Glycerol-3-phosphate Acyltransferase 2, Mitochondrial | 3.89  | 1.45  | 2.23   | 0.13  | -1.41 | 3.54E-01 | -0.31 | 8.69E-01 | -5.09  | 8.96E-04 | BL-Down-1 |
| ENSMMUG00000018423  | #N/A        | NANA                                                  | 1.99  | 6.33  | 3.07   | 0.75  | 1.49  | 3.10E-01 | -2.07 | 1.39E-01 | -4.06  | 1.96E-02 | BL-Down-1 |
| ENSMMUG00000002234  | FBLN7       | Fibulin 7                                             | 8.71  | 4.10  | 1.45   | 0.03  | -1.78 | 2.54E-01 | -2.88 | 5.16E-02 | -4.49  | 2.29E-02 | BL-Down-1 |
| ENSMMUG00000001292  | SACS        | Sacsin Molecular Chaperone                            | 6.59  | 8.90  | 5.70   | 1.36  | -0.15 | 8.49E-01 | -0.26 | 7.22E-01 | -2.26  | 1.27E-04 | BL-Down-1 |
| ENSMMUG00000013473  | SETDB2      | SET Domain Bifurcated 2                               | 7.04  | 6.06  | 5.21   | 1.60  | -0.12 | 9.04E-01 | -0.14 | 8.75E-01 | -1.65  | 4.37E-02 | BL-Down-1 |
| ENSMMUG00000030683  | #N/A        | NANA                                                  | 2.41  | 3.34  | 6.40   | 1.46  | -1.50 | 3.13E-01 | 1.81  | 2.05E-01 | -5.03  | 7.27E-04 | BL-Down-1 |
| ENSMMUG000000043739 | OPRL1       | Opioid Related Nociceptin Receptor 1                  | 1.39  | 0.59  | 0.02   | 0.00  | -2.96 | 2.17E-01 | -3.37 | 1.75E-01 | -18.54 | 1.01E-15 | BL-Down-1 |
| ENSMMUG00000000072  | CSTF1       | Cleavage Stimulation Factor Subunit 1                 | 70.47 | 53.51 | 25.10  | 12.63 | -0.62 | 2.89E-01 | -0.49 | 4.11E-01 | -1.89  | 1.19E-03 | BL-Down-1 |
| ENSMMUG000000004403 | ID1         | Inhibitor Of DNA Binding 1, HLH Protein               | 0.69  | 4.50  | 24.40  | 0.66  | 2.61  | 6.07E-02 | 0.89  | 5.92E-01 | -3.75  | 3.11E-02 | BL-Down-1 |
| ENSMMUG000000043181 | #N/A        | NANA                                                  | 0.47  | 6.93  | 4.74   | 0.29  | 3.26  | 1.23E-01 | 0.05  | 9.86E-01 | -7.00  | 2.62E-03 | BL-Down-1 |
| ENSMMUG000000048204 | #N/A        | NANA                                                  | 2.80  | 2.03  | 1.61   | 0.05  | 0.41  | 8.36E-01 | -1.72 | 2.67E-01 | -4.91  | 4.19E-03 | BL-Down-1 |
| ENSMMUG000000020329 | ALOX12B     | Arachidonate 12-lipoxygenase, 12R Type                | 0.08  | 1.44  | 1.02   | 0.04  | 0.24  | 9.31E-01 | 1.68  | 4.09E-01 | -5.76  | 7.61E-03 | BL-Down-1 |
| ENSMMUG000000037644 | CPD         | Carboxypeptidase D                                    | 6.80  | 7.51  | 8.06   | 2.24  | 0.03  | 9.76E-01 | 0.56  | 4.32E-01 | -2.53  | 1.69E-04 | BL-Down-1 |
| ENSMMUG00000021350  | CDK12       | Cyclin Dependent Kinase 12                            | 76.11 | ##### | 69.68  | 34.92 | 0.55  | 2.61E-01 | -0.57 | 2.43E-01 | -1.23  | 2.40E-02 | BL-Down-1 |
| ENSMMUG000000042281 | #N/A        | NANA                                                  | 2.04  | 2.33  | 0.10   | 0.00  | -7.56 | 5.67E-02 | -3.06 | 5.12E-01 | -13.48 | 3.13E-03 | BL-Down-1 |
| ENSMMUG000000001944 | C20H16orf72 | Chromosome 20 Open Reading Frame, Human C16orf72      | ##### | ##### | 287.90 | 78.80 | -0.34 | 6.34E-01 | 0.23  | 7.60E-01 | -1.55  | 2.43E-02 | BL-Down-1 |
| ENSMMUG000000005699 | SCNN1G      | Sodium Channel Epithelial 1 Gamma Subunit             | 5.35  | 1.47  | 1.19   | 0.04  | -2.23 | 6.64E-02 | -0.67 | 6.56E-01 | -4.83  | 4.24E-04 | BL-Down-1 |
| ENSMMUG000000005625 | FBRS        | Fibrosin                                              | 16.93 | 17.03 | 6.42   | 1.76  | 0.07  | 9.53E-01 | -1.58 | 5.84E-02 | -2.15  | 3.83E-02 | BL-Down-1 |
| ENSMMUG000000043657 | #N/A        | NANA                                                  | 5.35  | 5.66  | 2.40   | 0.49  | -1.88 | 2.60E-01 | -0.37 | 8.66E-01 | -4.65  | 1.55E-02 | BL-Down-1 |
| ENSMMUG000000016633 | TERF2       | Telomeric Repeat Binding Factor 2                     | 21.84 | 17.39 | 13.46  | 6.25  | -0.68 | 3.91E-01 | -0.11 | 9.17E-01 | -1.82  | 3.29E-02 | BL-Down-1 |
| ENSMMUG000000029083 | CTRB2       | Chymotrypsinogen B2                                   | 4.48  | 8.46  | 0.05   | 0.03  | -0.90 | 6.17E-01 | -3.10 | 6.91E-02 | -4.74  | 1.95E-02 | BL-Down-1 |
| ENSMMUG00000002629  | #N/A        | NANA                                                  | 4.42  | 8.48  | 0.05   | 0.11  | -2.12 | 2.48E-01 | -1.04 | 6.65E-01 | -4.65  | 4.38E-02 | BL-Down-1 |
| ENSMMUG000000013823 | CDT1        | Chromatin Licensing And DNA Replication Factor 1      | 8.64  | 19.92 | 20.85  | 10.21 | 0.99  | 4.35E-01 | 0.95  | 4.51E-01 | -3.17  | 1.49E-02 | BL-Down-1 |
| ENSMMUG000000004498 | PIAS2       | Protein Inhibitor Of Activated STAT 2                 | 14.45 | 13.17 | 11.98  | 3.83  | -0.14 | 8.77E-01 | -0.41 | 5.82E-01 | -1.75  | 1.72E-02 | BL-Down-1 |
| ENSMMUG000000023218 | ONECUT2     | One Cut Homeobox 2                                    | 0.84  | 0.98  | 2.57   | 1.17  | 0.36  | 8.64E-01 | 1.23  | 4.68E-01 | -4.25  | 1.70E-02 | BL-Down-1 |
| ENSMMUG000000003937 | #N/A        | NANA                                                  | 1.64  | 7.13  | 0.24   | 0.00  | -4.76 | 1.44E-01 | 2.18  | 5.76E-01 | -17.95 | 1.93E-08 | BL-Down-1 |

|                    |              |                                                     |       |       |        |       |       |          |       |          |        |          |           |
|--------------------|--------------|-----------------------------------------------------|-------|-------|--------|-------|-------|----------|-------|----------|--------|----------|-----------|
| ENSMMUG00000022207 | PLPPR2       | Phospholipid Phosphatase Related 2                  | 5.39  | 6.97  | 1.08   | 0.21  | -2.10 | 1.03E-01 | -1.28 | 3.73E-01 | -3.69  | 2.15E-02 | BL-Down-1 |
| ENSMMUG00000015533 | LOC693611    | Zinc Finger Protein 493-like                        | 28.95 | 49.35 | 38.24  | 19.69 | 0.86  | 5.26E-02 | 0.13  | 8.25E-01 | -1.31  | 1.11E-02 | BL-Down-1 |
| ENSMMUG00000021111 | SIGLEC10     | Sialic Acid Binding Ig Like Lectin 10               | 2.67  | 1.09  | 2.65   | 0.03  | 0.24  | 9.41E-01 | -1.75 | 4.87E-01 | -6.33  | 2.14E-02 | BL-Down-1 |
| ENSMMUG00000046537 | LOC106994856 | Zinc Finger Protein 813-like                        | 6.74  | 17.84 | 11.57  | 3.41  | 0.91  | 1.30E-01 | -0.37 | 5.91E-01 | -1.56  | 2.60E-02 | BL-Down-1 |
| ENSMMUG00000028716 | TMEM150B     | Transmembrane Protein 150B                          | 2.77  | 0.37  | 0.08   | 0.00  | -4.78 | 8.26E-02 | -5.28 | 6.47E-02 | -16.45 | 5.86E-09 | BL-Down-1 |
| ENSMMUG00000000929 | #N/A         | NANA                                                | 12.89 | 19.13 | 6.52   | 0.51  | 0.13  | 9.21E-01 | -1.51 | 9.45E-02 | -3.24  | 8.94E-04 | BL-Down-1 |
| ENSMMUG00000000362 | ZNF582       | Zinc Finger Protein 582                             | 1.29  | 6.49  | 3.19   | 0.26  | 2.23  | 5.80E-02 | -2.00 | 9.13E-02 | -3.45  | 1.37E-02 | BL-Down-1 |
| ENSMMUG00000038842 | #N/A         | NANA                                                | 4.13  | 4.27  | 7.75   | 0.34  | -2.03 | 2.79E-01 | -0.92 | 6.73E-01 | -5.12  | 1.39E-02 | BL-Down-1 |
| ENSMMUG00000044297 | #N/A         | NANA                                                | 0.38  | 0.63  | 1.02   | 0.04  | -0.58 | 7.72E-01 | -0.38 | 8.67E-01 | -5.24  | 6.07E-03 | BL-Down-1 |
| ENSMMUG00000046551 | #N/A         | NANA                                                | 0.31  | 1.08  | 0.56   | 0.36  | -0.36 | 9.02E-01 | 1.77  | 4.28E-01 | -6.20  | 9.79E-03 | BL-Down-1 |
| ENSMMUG00000011264 |              |                                                     | 1.17  | 15.27 | 14.98  | 0.72  | 3.76  | 6.52E-03 | -0.43 | 8.26E-01 | -4.03  | 2.06E-02 | BL-Down-2 |
| ENSMMUG00000032121 | ZYG11A       | Zyg-11 Family Member A, Cell Cycle Regulator        | 0.65  | 15.72 | 18.50  | 4.66  | 4.70  | 3.83E-16 | 0.28  | 7.46E-01 | -2.00  | 1.04E-02 | BL-Down-2 |
| ENSMMUG00000013680 | FAM151A      | Family With Sequence Similarity 151 Member A        | 0.00  | 5.54  | 4.08   | 0.13  | ##### | 3.29E-09 | -0.30 | 9.05E-01 | -5.79  | 6.28E-03 | BL-Down-2 |
| ENSMMUG00000031542 | IGSF8        | Immunoglobulin Superfamily Member 8                 | 0.03  | 2.16  | 4.20   | 0.33  | ##### | 2.69E-08 | 1.76  | 4.71E-01 | -5.50  | 3.40E-02 | BL-Down-2 |
| ENSMMUG00000046792 |              |                                                     | 0.01  | 1.12  | 1.69   | 0.04  | 6.86  | 4.28E-05 | 1.81  | 3.62E-01 | -6.82  | 9.86E-04 | BL-Down-2 |
| ENSMMUG00000002861 | TMEM45A      | Transmembrane Protein 45A                           | 0.34  | 6.81  | 7.65   | 0.47  | 4.04  | 1.01E-03 | 0.67  | 6.84E-01 | -4.56  | 1.88E-03 | BL-Down-2 |
| ENSMMUG00000014231 | BTLA         | B And T Lymphocyte Associated                       | 0.08  | 2.31  | 13.95  | 0.54  | 5.39  | 1.97E-06 | 2.04  | 1.04E-01 | -4.34  | 1.72E-03 | BL-Down-2 |
| ENSMMUG00000016395 | ARGFX        | Arginine-fifty Homeobox                             | 0.16  | 82.11 | 144.27 | 31.98 | 8.71  | 2.52E-23 | 1.35  | 1.95E-01 | -2.81  | 1.76E-02 | BL-Down-2 |
| ENSMMUG00000031684 | FAM198A      | Family With Sequence Similarity 198 Member A        | 0.57  | 10.89 | 9.83   | 1.18  | 3.37  | 4.33E-04 | 0.75  | 5.37E-01 | -4.30  | 7.35E-05 | BL-Down-2 |
| ENSMMUG00000020342 | KAT2B        | Lysine Acetyltransferase 2B                         | 1.08  | 18.42 | 23.93  | 1.76  | 4.10  | 3.16E-07 | 0.93  | 3.49E-01 | -4.20  | 4.89E-06 | BL-Down-2 |
| ENSMMUG00000015473 | CFAP97       | Cilia And Flagella Associated Protein 97            | 9.21  | 36.14 | 35.38  | 6.13  | 1.40  | 1.21E-02 | 0.10  | 9.06E-01 | -2.19  | 4.23E-04 | BL-Down-2 |
| ENSMMUG00000045620 |              |                                                     | 20.60 | 55.37 | 49.80  | 24.97 | 1.37  | 2.88E-04 | -0.05 | 9.31E-01 | -1.01  | 4.80E-02 | BL-Down-2 |
| ENSMMUG00000011958 |              |                                                     | 12.76 | ##### | 294.43 | 70.40 | 4.52  | 3.01E-16 | -0.18 | 8.43E-01 | -1.95  | 8.87E-03 | BL-Down-2 |
| ENSMMUG00000002277 | UBN2         | Ubinuclein 2                                        | 15.68 | 33.08 | 22.49  | 13.29 | 1.00  | 3.05E-03 | -0.66 | 6.18E-02 | -0.91  | 3.90E-02 | BL-Down-2 |
| ENSMMUG00000038794 | BRX1         | BRX1, Biogenesis Of Ribosomes                       | 9.56  | 22.51 | 16.91  | 7.26  | 1.25  | 6.27E-03 | -0.40 | 4.60E-01 | -1.18  | 4.67E-02 | BL-Down-2 |
| ENSMMUG00000018972 | POLR3G       | RNA Polymerase III Subunit G                        | 4.18  | 15.43 | 19.25  | 10.15 | 1.71  | 4.46E-03 | 0.74  | 2.79E-01 | -1.72  | 2.28E-02 | BL-Down-2 |
| ENSMMUG00000014782 | STC2         | Stanniocalcin 2                                     | 0.66  | 5.79  | 3.37   | 1.39  | 4.35  | 9.15E-05 | -1.45 | 2.67E-01 | -3.38  | 2.00E-02 | BL-Down-2 |
| ENSMMUG00000015975 |              |                                                     | 1.52  | 38.05 | 44.98  | 9.29  | 4.48  | 1.37E-12 | 0.02  | 9.85E-01 | -2.18  | 9.92E-03 | BL-Down-2 |
| ENSMMUG00000014072 | IER3         | Immediate Early Response 3                          | 0.80  | ##### | 85.97  | 4.42  | 7.29  | 7.15E-14 | -0.09 | 9.57E-01 | -3.44  | 7.71E-03 | BL-Down-2 |
| ENSMMUG00000029466 |              |                                                     | 0.07  | 1.95  | 1.72   | 0.14  | ##### | 1.05E-06 | -2.67 | 2.50E-01 | -6.03  | 2.72E-02 | BL-Down-2 |
| ENSMMUG00000020693 | RSL24D1      | Ribosomal L24 Domain Containing 1                   | 13.99 | 54.68 | 64.59  | 31.46 | 1.71  | 1.11E-05 | 0.46  | 3.31E-01 | -1.23  | 1.57E-02 | BL-Down-2 |
| ENSMMUG00000014886 | PAQR5        | Progesterin And AdipoQ Receptor Family Member 5     | 0.01  | 0.91  | 0.54   | 0.09  | 4.69  | 6.97E-03 | 0.35  | 8.84E-01 | -5.37  | 8.29E-03 | BL-Down-2 |
| ENSMMUG00000004341 | MAX          | MYC Associated Factor X                             | ##### | ##### | 567.18 | 99.45 | 2.38  | 9.55E-09 | -0.31 | 5.88E-01 | -2.20  | 4.40E-06 | BL-Down-2 |
| ENSMMUG00000010620 | WDR45        | WD Repeat Domain 45                                 | 2.81  | 34.32 | 32.33  | 6.05  | 3.31  | 6.00E-05 | -0.15 | 9.06E-01 | -2.35  | 3.26E-02 | BL-Down-2 |
| ENSMMUG00000021739 |              |                                                     | 30.64 | ##### | 87.44  | 5.43  | 2.54  | 3.55E-03 | -1.71 | 6.12E-02 | -2.74  | 1.08E-02 | BL-Down-2 |
| ENSMMUG00000022303 | SLC7A2       | Solute Carrier Family 7 Member 2                    | 0.83  | 29.99 | 57.70  | 12.67 | 5.21  | 1.12E-08 | 1.52  | 1.54E-01 | -2.58  | 4.43E-02 | BL-Down-2 |
| ENSMMUG00000042006 | CA13         | Carbonic Anhydrase 13                               | 0.06  | 5.96  | 4.53   | 0.16  | 6.05  | 1.84E-06 | 0.38  | 8.41E-01 | -5.46  | 2.51E-04 | BL-Down-2 |
| ENSMMUG0000003665  | PLBD1        | Phospholipase B Domain Containing 1                 | 0.04  | 2.84  | 17.04  | 0.92  | 4.22  | 8.41E-03 | 3.06  | 5.92E-02 | -4.69  | 1.59E-02 | BL-Down-2 |
| ENSMMUG00000016628 | HELB         | DNA Helicase B                                      | 1.90  | 12.03 | 17.24  | 3.03  | 2.53  | 5.37E-04 | 0.59  | 5.23E-01 | -2.66  | 2.38E-03 | BL-Down-2 |
| ENSMMUG00000042077 |              |                                                     | 0.08  | 26.49 | 49.87  | 5.67  | 8.79  | 3.25E-19 | 1.11  | 2.47E-01 | -2.82  | 9.92E-03 | BL-Down-2 |
| ENSMMUG00000012317 | DPF2         | Double PHD Fingers 2                                | 33.03 | ##### | 195.10 | 39.26 | 2.85  | 2.78E-08 | -0.48 | 4.75E-01 | -1.68  | 1.38E-02 | BL-Down-2 |
| ENSMMUG00000002183 | OSBPL6       | Oxysterol Binding Protein Like 6                    | 1.51  | 5.63  | 7.71   | 1.32  | 1.88  | 7.85E-03 | 0.86  | 2.80E-01 | -3.16  | 3.78E-05 | BL-Down-2 |
| ENSMMUG00000003314 | AQP3         | Aquaporin 3 (Gill Blood Group)                      | 10.74 | ##### | 90.25  | 15.72 | 4.23  | 2.34E-08 | -0.92 | 3.26E-01 | -2.80  | 3.78E-03 | BL-Down-2 |
| ENSMMUG00000040135 | PDCL3        | Phosducin Like 3                                    | 20.47 | ##### | 543.56 | ##### | 4.56  | 2.17E-16 | 0.18  | 8.41E-01 | -1.96  | 8.43E-03 | BL-Down-2 |
| ENSMMUG00000010657 | LOC700564    | Melanoma Antigen Preferentially Expressed In Tumors | 1.23  | 32.17 | 10.58  | 2.10  | 4.75  | 3.98E-07 | -1.42 | 2.00E-01 | -2.95  | 1.82E-02 | BL-Down-2 |
| ENSMMUG00000012118 | EFCAB5       | EF-hand Calcium Binding Domain 5                    | 0.04  | 2.35  | 1.87   | 0.20  | 4.94  | 1.03E-04 | 1.37  | 3.77E-01 | -3.75  | 3.10E-02 | BL-Down-2 |

|                     |              |                                                                  |       |       |        |       |       |          |       |          |       |          |           |
|---------------------|--------------|------------------------------------------------------------------|-------|-------|--------|-------|-------|----------|-------|----------|-------|----------|-----------|
| ENSMMUG00000047705  |              |                                                                  | 0.04  | 1.16  | 0.74   | 0.57  | 8.81  | 1.02E-05 | -0.93 | 7.39E-01 | -5.58 | 4.54E-02 | BL-Down-2 |
| ENSMMUG00000019632  | RSL1D1       | Ribosomal L1 Domain Containing 1                                 | 71.54 | ##### | 245.91 | 88.87 | 1.76  | 2.29E-10 | 0.03  | 9.48E-01 | -1.36 | 3.77E-05 | BL-Down-2 |
| ENSMMUG00000013877  | OTOA         | Otoancorin                                                       | 1.03  | 4.90  | 3.74   | 0.07  | 2.94  | 2.68E-02 | -2.36 | 8.51E-02 | -3.60 | 3.77E-02 | BL-Down-2 |
| ENSMMUG00000018102  | C20H16orf70  | Chromosome 20 Open Reading Frame, Human C16orf70                 | 5.56  | 17.76 | 16.21  | 5.07  | 1.73  | 1.21E-02 | -0.02 | 9.85E-01 | -2.17 | 8.28E-03 | BL-Down-2 |
| ENSMMUG00000021792  | ATP9B        | ATPase Phospholipid Transporting 9B (putative)                   | 5.42  | 18.21 | 7.63   | 2.92  | 1.56  | 2.37E-02 | -0.95 | 1.98E-01 | -1.89 | 2.59E-02 | BL-Down-2 |
| ENSMMUG00000028843  | SLC5A5       | Solute Carrier Family 5 Member 5                                 | 0.12  | 2.53  | 0.41   | 0.02  | 5.40  | 2.07E-03 | -1.51 | 4.63E-01 | -5.91 | 6.14E-03 | BL-Down-2 |
| ENSMMUG00000009292  | ZIK1         | Zinc Finger Protein Interacting With K Protein 1                 | 3.00  | 10.26 | 5.87   | 1.46  | 1.76  | 2.48E-03 | -0.86 | 1.85E-01 | -1.70 | 2.20E-02 | BL-Down-2 |
| ENSMMUG00000015673  | ZIM3         | Zinc Finger Imprinted 3                                          | 0.27  | ##### | 100.41 | 7.11  | 9.34  | 1.64E-34 | -1.18 | 2.08E-01 | -3.55 | 1.82E-04 | BL-Down-2 |
| ENSMMUG00000012157  | USP29        | Ubiquitin Specific Peptidase 29                                  | 0.20  | 13.43 | 4.97   | 0.71  | 5.35  | 2.05E-10 | -1.16 | 2.60E-01 | -2.47 | 3.78E-02 | BL-Down-2 |
| ENSMMUG00000039741  | LOC720395    | Class I Histocompatibility Antigen, Gogo-B*0101 Alpha Chain-like | 0.13  | 3.95  | 11.63  | 0.61  | 5.50  | 4.75E-05 | 0.95  | 5.87E-01 | -4.88 | 4.26E-03 | BL-Down-2 |
| ENSMMUG00000007377  | LOC106995802 | Zinc Finger Protein 679-like                                     | 5.71  | ##### | 227.89 | 13.52 | 5.84  | 5.96E-17 | -0.67 | 4.73E-01 | -3.77 | 5.72E-06 | BL-Down-2 |
| ENSMMUG00000041735  |              |                                                                  | 4.05  | 20.57 | 23.71  | 10.10 | 2.73  | 4.87E-05 | 0.03  | 9.78E-01 | -2.03 | 2.20E-02 | BL-Down-2 |
| ENSMMUG00000043586  | ID3          | Inhibitor Of DNA Binding 3, HLH Protein                          | 0.22  | 2.24  | 3.47   | 1.50  | 3.08  | 8.09E-03 | 2.88  | 1.29E-02 | -3.90 | 5.08E-03 | BL-Down-3 |
| ENSMMUG00000032031  | LOC713714    | 60S Ribosomal Protein L12 Pseudogene                             | 90.60 | ##### | 463.94 | ##### | 0.97  | 7.35E-03 | 1.66  | 9.99E-07 | -1.20 | 5.44E-03 | BL-Down-3 |
| ENSMMUG00000001349  | CHL1         | Cell Adhesion Molecule L1 Like                                   | 0.00  | 0.75  | 0.80   | 0.49  | 9.48  | 1.54E-07 | 5.87  | 5.78E-04 | -5.55 | 6.19E-03 | BL-Down-3 |
| ENSMMUG000000031898 |              |                                                                  | 65.75 | ##### | 591.82 | ##### | 2.22  | 7.77E-13 | 1.06  | 1.51E-03 | -0.89 | 4.58E-02 | BL-Down-3 |
| ENSMMUG00000044501  | LOC702620    | 60S Ribosomal Protein L12 Pseudogene                             | 81.15 | ##### | 430.61 | ##### | 0.94  | 5.46E-03 | 1.76  | 2.26E-08 | -1.17 | 3.30E-03 | BL-Down-3 |
| ENSMMUG00000048214  | LOC715037    | 60S Ribosomal Protein L12 Pseudogene                             | 78.80 | ##### | 398.09 | ##### | 0.99  | 4.38E-03 | 1.59  | 1.36E-06 | -1.20 | 3.29E-03 | BL-Down-3 |
| ENSMMUG00000039222  |              |                                                                  | 82.51 | ##### | 402.21 | ##### | 0.95  | 8.19E-03 | 1.64  | 1.03E-06 | -1.17 | 6.18E-03 | BL-Down-3 |
| ENSMMUG00000042009  |              |                                                                  | 0.05  | 1.11  | 46.14  | 20.75 | 2.96  | 3.50E-03 | 7.82  | 6.09E-19 | -2.75 | 2.52E-02 | BL-Down-3 |
| ENSMMUG00000029534  |              |                                                                  | ##### | ##### | #####  | ##### | 2.19  | 4.00E-13 | 1.03  | 1.52E-03 | -0.91 | 3.26E-02 | BL-Down-3 |
| ENSMMUG00000023265  | AKAP12       | A-kinase Anchoring Protein 12                                    | 0.27  | 12.88 | 185.26 | 31.19 | 4.07  | 1.11E-05 | 5.88  | 8.08E-11 | -3.81 | 5.39E-04 | BL-Down-3 |
| ENSMMUG00000014412  |              |                                                                  | ##### | ##### | 839.47 | ##### | 2.13  | 2.85E-11 | 1.00  | 3.82E-03 | -0.94 | 3.84E-02 | BL-Down-3 |
| ENSMMUG00000032052  | LOC699681    | 60S Ribosomal Protein L12 Pseudogene                             | 28.42 | 60.28 | 135.34 | ##### | 0.98  | 9.33E-03 | 1.64  | 3.84E-06 | -1.06 | 2.47E-02 | BL-Down-3 |
| ENSMMUG00000020873  | SPIC         | Spi-C Transcription Factor                                       | 0.02  | 2.70  | 42.69  | 18.78 | 4.08  | 2.15E-03 | 6.37  | 3.08E-08 | -3.41 | 3.00E-02 | BL-Down-3 |
| ENSMMUG00000041517  | LOC100427498 | 60S Ribosomal Protein L12 Pseudogene                             | 63.47 | ##### | 328.72 | ##### | 0.88  | 1.94E-02 | 1.79  | 1.86E-07 | -1.15 | 9.19E-03 | BL-Down-3 |
| ENSMMUG00000000422  | RPL12        | Ribosomal Protein L12                                            | ##### | ##### | 808.15 | ##### | 1.00  | 4.76E-03 | 1.68  | 3.83E-07 | -1.20 | 4.01E-03 | BL-Down-3 |
| ENSMMUG000000031250 | LOC708085    | 60S Ribosomal Protein L31 Pseudogene                             | 67.57 | ##### | 395.38 | ##### | 1.28  | 1.77E-03 | 1.47  | 2.20E-04 | -1.11 | 3.73E-02 | BL-Down-3 |
| ENSMMUG00000002704  |              |                                                                  | 69.66 | ##### | 618.20 | ##### | 2.18  | 1.16E-13 | 1.07  | 6.64E-04 | -0.90 | 2.77E-02 | BL-Down-3 |
| ENSMMUG000000047655 |              |                                                                  | 51.58 | ##### | 464.56 | ##### | 2.45  | 5.51E-12 | 0.92  | 1.97E-02 | -1.01 | 4.75E-02 | BL-Down-3 |
| ENSMMUG00000013429  | RPS19        | Ribosomal Protein S19                                            | 62.50 | ##### | 602.98 | ##### | 2.50  | 1.03E-13 | 0.99  | 7.19E-03 | -0.96 | 4.62E-02 | BL-Down-3 |
| ENSMMUG00000002309  | LOC720019    | 60S Ribosomal Protein L12-like                                   | ##### | ##### | 707.03 | ##### | 0.97  | 5.74E-03 | 1.70  | 2.53E-07 | -1.21 | 3.24E-03 | BL-Down-3 |
| ENSMMUG00000043313  |              |                                                                  | 99.74 | ##### | 498.34 | ##### | 0.93  | 8.85E-03 | 1.67  | 4.06E-07 | -1.22 | 3.11E-03 | BL-Down-3 |
| ENSMMUG00000019239  | TBC1D19      | TBC1 Domain Family Member 19                                     | 0.78  | 0.57  | 2.42   | 0.12  | -4.33 | 3.43E-02 | 5.98  | 2.27E-03 | -8.04 | 6.26E-04 | BL-Down-4 |
| ENSMMUG00000007310  | SLC25A12     | Solute Carrier Family 25 Member 12                               | 4.05  | 0.91  | 2.95   | 0.78  | -2.93 | 6.69E-03 | 2.96  | 5.67E-03 | -2.97 | 3.11E-02 | BL-Down-4 |
| ENSMMUG00000018791  | MOCOS        | Molybdenum Cofactor Sulfurase                                    | 4.13  | 1.33  | 1.48   | 0.28  | -3.00 | 5.38E-03 | 2.41  | 3.12E-02 | -4.01 | 2.22E-03 | BL-Down-4 |

- a) FPKM: Fragments Per Kilobase of transcript per Million mapped reads.  
b) L2FC: Log fold change of base 2.  
c) FDR: False discovery rate. Adjusted p-value using the Benjamin-Hochberg method.
