# Supplementary material
Source: PubMed Central journal article supplement (PMC6417155)
Supplement: gaz001_schall_et_al._table_s8.pdf [file gaz001_schall_et_al._table_s8.pdf]

Table S8 - IPA canonical pathways unique to maternal super-group

| Canonical Pathways                                         | p-value <sup>a</sup> | Z-score <sup>b</sup> | Activation State | Total DEGs | Sub-Group |
|------------------------------------------------------------|----------------------|----------------------|------------------|------------|-----------|
| Actin Cytoskeleton Signaling                               | 2.40E-03             | -4.6                 | Inhibited        | 27         | M-1       |
| Signaling by Rho Family GTPases                            | 1.74E-02             | -4.264               | Inhibited        | 26         | M-1       |
| Synaptic Long Term Depression                              | 5.37E-04             | -4.491               | Inhibited        | 24         | M-1       |
| Calcium Signaling                                          | 1.02E-02             | -3.606               | Inhibited        | 23         | M-1       |
| Dopamine-DARPP32 Feedback in cAMP Signaling                | 1.29E-03             | -2.236               | Inhibited        | 22         | M-1       |
| RhoGDI Signaling                                           | 1.41E-02             | 3.357                | Activated        | 20         | M-1       |
| D-myo-inositol-5-phosphate Metabolism                      | 1.12E-02             |                      |                  | 19         | M-1       |
| 3-phosphoinositide Degradation                             | 3.39E-02             |                      |                  | 17         | M-1       |
| Th2 Pathway                                                | 4.17E-02             | -2.496               | Inhibited        | 16         | M-1       |
| Cellular Effects of Sildenafil (Viagra)                    | 2.75E-02             |                      |                  | 15         | M-1       |
| GPCR-Mediated Nutrient Sensing in Enteroendocrine Cells    | 1.66E-02             | -3.742               | Inhibited        | 14         | M-1       |
| PAK Signaling                                              | 6.92E-03             | -2.496               | Inhibited        | 14         | M-1       |
| Sperm Motility                                             | 4.27E-02             | -2.496               | Inhibited        | 14         | M-1       |
| TGF- $\beta$ Signaling                                     | 4.79E-03             | -1.897               |                  | 13         | M-1       |
| Fc $\gamma$ RIIB Signaling in B Lymphocytes                | 1.51E-02             | -2.646               | Inhibited        | 11         | M-1       |
| Netrin Signaling                                           | 3.47E-03             |                      |                  | 11         | M-1       |
| Pyridoxal 5'-phosphate Salvage Pathway                     | 3.47E-03             |                      |                  | 11         | M-1       |
| Synaptic Long Term Depression                              | 1.38E-02             | -3.162               | Inhibited        | 10         | M-2       |
| VDR/RXR Activation                                         | 3.31E-02             |                      |                  | 10         | M-1       |
| Notch Signaling                                            | 6.92E-04             | -2.449               | Inhibited        | 9          | M-1       |
| Synaptic Long Term Potentiation                            | 3.98E-03             | -2.333               | Inhibited        | 9          | M-2       |
| D-myo-inositol (1, 4, 5)-Trisphosphate Biosynthesis        | 3.89E-05             |                      |                  | 9          | M-1       |
| Phospholipases                                             | 2.09E-02             |                      |                  | 9          | M-1       |
| D-myo-inositol-5-phosphate Metabolism                      | 2.29E-02             |                      |                  | 9          | M-2       |
| 3-phosphoinositide Degradation                             | 2.00E-02             |                      |                  | 9          | M-2       |
| Th1 and Th2 Activation Pathway                             | 4.68E-02             |                      |                  | 9          | M-2       |
| D-myo-inositol (1, 4, 5, 6)-Tetrakisphosphate Biosynthesis | 3.09E-02             |                      |                  | 8          | M-2       |
| D-myo-inositol (3, 4, 5, 6)-tetrakisphosphate Biosynthesis | 3.09E-02             |                      |                  | 8          | M-2       |
| Sperm Motility                                             | 4.37E-02             | -2.646               | Inhibited        | 7          | M-2       |
| Antioxidant Action of Vitamin C                            | 2.04E-02             | 2.449                | Activated        | 7          | M-2       |
| Actin Cytoskeleton Signaling                               | 1.95E-03             | -2                   | Inhibited        | 7          | M-3       |
| nNOS Signaling in Skeletal Muscle Cells                    | 1.74E-02             |                      |                  | 7          | M-1       |
| Factors Promoting Cardiogenesis in Vertebrates             | 2.95E-02             |                      |                  | 6          | M-2       |
| Melatonin Signaling                                        | 3.63E-02             | -2.236               | Inhibited        | 5          | M-2       |
| Opioid Signaling Pathway                                   | 3.98E-02             | -2.236               | Inhibited        | 5          | M-3       |
| STAT3 Pathway                                              | 3.98E-02             | -1.342               |                  | 5          | M-2       |
| ERK/MAPK Signaling                                         | 1.95E-02             | -1.342               |                  | 5          | M-3       |
| Chemokine Signaling                                        | 3.47E-02             | -0.447               |                  | 5          | M-2       |
| nNOS Signaling in Neurons                                  | 6.61E-03             |                      |                  | 5          | M-2       |
| IL-10 Signaling                                            | 3.09E-02             |                      |                  | 5          | M-2       |
| RhoGDI Signaling                                           | 4.90E-02             | 2                    | Activated        | 4          | M-3       |
| Androgen Signaling                                         | 2.19E-02             | -2                   | Inhibited        | 4          | M-3       |

|                                                                                 |          |    |   |     |
|---------------------------------------------------------------------------------|----------|----|---|-----|
| Dopamine-DARPP32 Feedback in cAMP Signaling                                     | 3.89E-02 | -1 | 4 | M-3 |
| Superpathway of Citrulline Metabolism                                           | 1.48E-02 |    | 4 | M-1 |
| Netrin Signaling                                                                | 1.62E-03 |    | 4 | M-3 |
| FcγRIIB Signaling in B Lymphocytes                                              | 3.31E-03 |    | 4 | M-3 |
| PKCθ Signaling in T Lymphocytes                                                 | 3.47E-02 |    | 4 | M-3 |
| 4-1BB Signaling in T Lymphocytes                                                | 4.68E-02 |    | 3 | M-2 |
| PAK Signaling                                                                   | 4.37E-02 |    | 3 | M-3 |
| nNOS Signaling in Skeletal Muscle Cells                                         | 3.89E-03 |    | 3 | M-3 |
| VDR/RXR Activation                                                              | 2.24E-02 |    | 3 | M-3 |
| Maturity Onset Diabetes of Young (MODY) Signaling                               | 5.50E-04 |    | 3 | M-3 |
| Dopamine Receptor Signaling                                                     | 2.19E-02 |    | 3 | M-3 |
| CCR5 Signaling in Macrophages                                                   | 3.72E-02 |    | 3 | M-3 |
| GABA Receptor Signaling                                                         | 3.72E-02 |    | 3 | M-3 |
| Bile Acid Biosynthesis, Neutral Pathway                                         | 4.17E-02 |    | 2 | M-2 |
| GADD45 Signaling                                                                | 9.33E-03 |    | 2 | M-3 |
| Role of JAK2 in Hormone-like Cytokine Signaling                                 | 2.82E-02 |    | 2 | M-3 |
| Synaptic Long Term Depression                                                   | 3.31E-02 |    | 2 | M-4 |
| Synaptic Long Term Potentiation                                                 | 1.70E-02 |    | 2 | M-4 |
| Type I Diabetes Mellitus Signaling                                              | 7.59E-03 |    | 2 | M-5 |
| Sperm Motility                                                                  | 3.80E-03 |    | 2 | M-6 |
| GPCR-Mediated Integration of Enteroendocrine Signaling Exemplified by an L Cell | 1.29E-03 |    | 2 | M-6 |

a) The p-value: statistical overlap of differentially expressed gene list and gene set

b) Z-score:  $z > 1.96$  to be significantly activated or increased, and those with  $z < -1.96$  to be significantly inhibited
