# Supplementary material
Source: PubMed Central journal article supplement (PMC6417155)
Supplement: gaz001_schall_et_al._table_s9.pdf [file gaz001_schall_et_al._table_s9.pdf]

Table S9 - IPA biological functions unique to maternal super-group

| Categories                                                                                                                                                                                                                                                  | Functions Annotation                              | p-value <sup>a</sup> | Z-score <sup>b</sup> | Activation State | Total DEGs | Sub-Group |
|-------------------------------------------------------------------------------------------------------------------------------------------------------------------------------------------------------------------------------------------------------------|---------------------------------------------------|----------------------|----------------------|------------------|------------|-----------|
| Cellular Development, Cellular Growth and Proliferation, Nervous System Development and Function, Tissue Development                                                                                                                                        | Development of neurons                            | 7.48E-10             | -4.334               | Inhibited        | 95         | M-1       |
| Cellular Development, Cellular Growth and Proliferation, Nervous System Development and Function, Tissue Development                                                                                                                                        | Proliferation of neuronal cells                   | 3.01E-07             | -4.68                | Inhibited        | 81         | M-1       |
| Embryonic Development, Organismal Development                                                                                                                                                                                                               | Development of body axis                          | 3.16E-04             | -3.996               | Inhibited        | 67         | M-1       |
| Nervous System Development and Function                                                                                                                                                                                                                     | Morphology of nervous system                      | 8.62E-03             |                      |                  | 56         | M-1       |
| Cell Morphology                                                                                                                                                                                                                                             | Shape change of neurites                          | 2.38E-07             | -3.48                | Inhibited        | 54         | M-1       |
| Cell Morphology                                                                                                                                                                                                                                             | Shape change of neurons                           | 4.60E-07             | -3.157               | Inhibited        | 54         | M-1       |
| Cell-To-Cell Signaling and Interaction                                                                                                                                                                                                                      | Interaction of tumor cell lines                   | 8.02E-03             | -2.157               | Inhibited        | 51         | M-1       |
| Cell Cycle                                                                                                                                                                                                                                                  | Cell cycle progression of tumor cell lines        | 1.23E-06             | 1.611                |                  | 48         | M-1       |
| Cellular Growth and Proliferation                                                                                                                                                                                                                           | Cytostasis                                        | 4.35E-05             | -2.968               | Inhibited        | 44         | M-1       |
| Cell Morphology, Cellular Assembly and Organization, Cellular Development, Cellular Function and Maintenance, Cellular Growth and Proliferation, Embryonic Development, Nervous System Development and Function, Organismal Development, Tissue Development | Dendritic growth/branching                        | 1.57E-06             | -3.662               | Inhibited        | 42         | M-1       |
| Cellular Development, Cellular Growth and Proliferation, Hematological System Development and Function, Hematopoiesis, Tissue Development                                                                                                                   | Differentiation of hematopoietic cells            | 1.98E-04             | -0.868               |                  | 39         | M-1       |
| Behavior                                                                                                                                                                                                                                                    | Cognition                                         | 9.02E-04             | -3.414               | Inhibited        | 38         | M-1       |
| Cellular Development, Cellular Growth and Proliferation, Hematological System Development and Function, Hematopoiesis, Tissue Development                                                                                                                   | Differentiation of hematopoietic progenitor cells | 3.55E-04             | -0.903               |                  | 37         | M-1       |
| Cellular Movement, Nervous System Development and Function                                                                                                                                                                                                  | Migration of neurons                              | 1.76E-08             | -2.883               | Inhibited        | 36         | M-1       |
| Cellular Growth and Proliferation, Lymphoid Tissue Structure and Development                                                                                                                                                                                | Proliferation of lymphatic system cells           | 9.95E-03             | -2.84                | Inhibited        | 36         | M-2       |
| Embryonic Development, Nervous System Development and Function, Organ Development, Organismal Development, Tissue Development                                                                                                                               | Formation of brain                                | 2.35E-03             | -2.726               | Inhibited        | 35         | M-1       |
| Cellular Development, Cellular Growth and Proliferation, Hematological System Development and Function, Lymphoid Tissue Structure and Development                                                                                                           | Proliferation of immune cells                     | 1.05E-02             | -2.636               | Inhibited        | 35         | M-2       |
| Cellular Development, Cellular Growth and Proliferation, Hematological System Development and Function, Lymphoid Tissue Structure and Development                                                                                                           | Proliferation of lymphocytes                      | 5.46E-03             | -2.625               | Inhibited        | 34         | M-2       |
| Cellular Assembly and Organization, Cellular Function and Maintenance, Tissue Development                                                                                                                                                                   | Formation of actin filaments                      | 8.31E-04             | -1.835               |                  | 33         | M-1       |
| Cellular Assembly and Organization                                                                                                                                                                                                                          | Formation of plasma membrane                      | 5.53E-06             | -3.763               | Inhibited        | 30         | M-1       |
| Cell-To-Cell Signaling and Interaction, Cellular Assembly and Organization                                                                                                                                                                                  | Formation of cell-cell contacts                   | 8.74E-05             | -2.917               | Inhibited        | 28         | M-1       |
| Cellular Development, Cellular Growth and Proliferation                                                                                                                                                                                                     | Proliferation of leukemia cell lines              | 7.67E-03             | -1.286               |                  | 28         | M-1       |
| Cellular Growth and Proliferation                                                                                                                                                                                                                           | Arrest in proliferation of cells                  | 7.29E-03             |                      |                  | 28         | M-1       |
| Cell-To-Cell Signaling and Interaction, Cellular Assembly and Organization                                                                                                                                                                                  | Formation of intercellular junctions              | 1.15E-04             | -3.06                | Inhibited        | 27         | M-1       |
| Cellular Growth and Proliferation                                                                                                                                                                                                                           | Cytostasis of tumor cell lines                    | 1.15E-04             | -2.359               | Inhibited        | 27         | M-1       |
| Embryonic Development, Organismal Development                                                                                                                                                                                                               | Development of body axis                          | 1.02E-02             | -0.724               |                  | 27         | M-2       |
| Cell-To-Cell Signaling and Interaction, Cellular Assembly and Organization, Cellular Function and Maintenance                                                                                                                                               | Assembly of intercellular junctions               | 4.72E-05             | -3.397               | Inhibited        | 26         | M-1       |
| Cellular Development, Cellular Growth and Proliferation, Hematological System Development and Function, Lymphoid Tissue Structure and Development                                                                                                           | Cell proliferation of T lymphocytes               | 2.05E-02             | -2.234               | Inhibited        | 26         | M-2       |
| Cell-To-Cell Signaling and Interaction, Cellular Assembly and Organization, Cellular Function and Maintenance                                                                                                                                               | Development of gap junctions                      | 5.11E-06             | -3.251               | Inhibited        | 24         | M-1       |
| Nervous System Development and Function, Tissue Morphology                                                                                                                                                                                                  | Density of neurons                                | 9.00E-05             | -1.95                |                  | 24         | M-1       |
| Cell Cycle, Cell-To-Cell Signaling and Interaction, Cellular Growth and Proliferation                                                                                                                                                                       | Contact growth inhibition                         | 1.48E-03             | -1.682               |                  | 24         | M-1       |

|                                                                                                                                                                                                                                                                                |                                               |          |        |           |    |     |
|--------------------------------------------------------------------------------------------------------------------------------------------------------------------------------------------------------------------------------------------------------------------------------|-----------------------------------------------|----------|--------|-----------|----|-----|
| Cellular Movement, Connective Tissue Development and Function                                                                                                                                                                                                                  | Cell movement of fibroblasts                  | 6.84E-03 | -1.63  |           | 23 | M-1 |
| Cellular Movement                                                                                                                                                                                                                                                              | Cell movement of central nervous system cells | 6.44E-06 | -1.16  |           | 23 | M-1 |
| Cell-To-Cell Signaling and Interaction, Cellular Assembly and Organization, Cellular Development, Cellular Function and Maintenance, Cellular Growth and Proliferation, Nervous System Development and Function, Tissue Development                                            | Developmental process of synapse              | 8.09E-06 | -3.11  | Inhibited | 22 | M-1 |
| Respiratory System Development and Function                                                                                                                                                                                                                                    | Respiratory system development                | 4.18E-04 | -1.265 |           | 22 | M-1 |
| Cardiovascular System Development and Function, Tissue Morphology                                                                                                                                                                                                              | Permeability of vascular system               | 3.89E-03 | -1.054 |           | 21 | M-1 |
| DNA Replication, Recombination, and Repair                                                                                                                                                                                                                                     | Recombination                                 | 3.84E-03 | -1.57  |           | 20 | M-1 |
| Cellular Movement                                                                                                                                                                                                                                                              | Cell movement of brain cells                  | 2.59E-05 | -1.367 |           | 20 | M-1 |
| Cell Death and Survival                                                                                                                                                                                                                                                        | Cell death of gonadal cells                   | 5.77E-03 | 1.089  |           | 18 | M-1 |
| Cellular Movement                                                                                                                                                                                                                                                              | Migration of central nervous system cells     | 5.40E-04 | -1.738 |           | 17 | M-1 |
| Cell Morphology, Cellular Assembly and Organization, Cellular Development, Cellular Function and Maintenance, Cellular Growth and Proliferation, Embryonic Development, Nervous System Development and Function, Organismal Development, Tissue Development, Tissue Morphology | Density of dendritic spines                   | 1.58E-04 | -1.023 |           | 17 | M-1 |
| Cell-To-Cell Signaling and Interaction, Cellular Assembly and Organization                                                                                                                                                                                                     | Cell-cell adhesion                            | 8.37E-04 | -0.423 |           | 17 | M-1 |
| Lipid Metabolism, Molecular Transport, Small Molecule Biochemistry                                                                                                                                                                                                             | Concentration of acylglycerol                 | 1.04E-02 | -1.852 |           | 16 | M-2 |
| Cellular Movement                                                                                                                                                                                                                                                              | Migration of brain cells                      | 3.89E-04 | -1.555 |           | 16 | M-1 |
| Cellular Growth and Proliferation, Lymphoid Tissue Structure and Development                                                                                                                                                                                                   | Proliferation of lymphatic system cells       | 2.63E-03 | -1.545 |           | 16 | M-3 |
| Cell Cycle, Cell-To-Cell Signaling and Interaction, Cellular Growth and Proliferation                                                                                                                                                                                          | Contact growth inhibition of tumor cell lines | 7.08E-04 | -1.522 |           | 16 | M-1 |
| Lipid Metabolism, Small Molecule Biochemistry, Vitamin and Mineral Metabolism                                                                                                                                                                                                  | Synthesis of steroid                          | 1.35E-03 | 1.052  |           | 16 | M-2 |
| Cell Morphology                                                                                                                                                                                                                                                                | Morphology of tumor cell lines                | 7.06E-03 |        |           | 16 | M-2 |
| Post-Translational Modification                                                                                                                                                                                                                                                | Ubiquitination                                | 1.92E-04 | -3.552 | Inhibited | 15 | M-1 |
| Endocrine System Development and Function, Organ Morphology, Tissue Morphology                                                                                                                                                                                                 | Quantity of endocrine cells                   | 1.30E-03 | -1.885 |           | 15 | M-1 |
| Cell Death and Survival                                                                                                                                                                                                                                                        | Cell death of fibroblasts                     | 1.24E-02 | -0.069 |           | 15 | M-2 |
| Cell Morphology, Cellular Assembly and Organization, Cellular Development, Cellular Function and Maintenance, Cellular Growth and Proliferation, Embryonic Development, Nervous System Development and Function, Organismal Development, Tissue Development, Tissue Morphology | Morphology of dendritic spines                | 5.39E-05 |        |           | 15 | M-1 |
| Cell Morphology, Cellular Assembly and Organization, Cellular Development, Cellular Function and Maintenance, Cellular Growth and Proliferation, Embryonic Development, Nervous System Development and Function, Organismal Development, Tissue Development                    | Growth of dendrites                           | 5.67E-04 | -2.723 | Inhibited | 14 | M-1 |
| Cellular Assembly and Organization, Cellular Function and Maintenance, Tissue Development                                                                                                                                                                                      | Formation of actin filaments                  | 1.17E-02 | -2.154 | Inhibited | 14 | M-2 |
| Cellular Development, Embryonic Development, Organismal Development, Tissue Development                                                                                                                                                                                        | Differentiation of mesenchymal cells          | 6.87E-03 | -2.032 | Inhibited | 14 | M-1 |
| Cell Death and Survival                                                                                                                                                                                                                                                        | Cell death of germ cells                      | 3.59E-03 | 1.436  |           | 14 | M-1 |
| Cellular Development, Cellular Growth and Proliferation, Hematological System Development and Function, Lymphoid Tissue Structure and Development                                                                                                                              | Proliferation of lymphocytes                  | 5.79E-03 | -0.976 |           | 14 | M-3 |
| Cell Cycle                                                                                                                                                                                                                                                                     | Interphase of cervical cancer cell lines      | 2.94E-03 | -0.863 |           | 14 | M-1 |
| Cell-To-Cell Signaling and Interaction                                                                                                                                                                                                                                         | Binding of carcinoma cell lines               | 6.34E-05 | -0.496 |           | 14 | M-1 |
| Cell Death and Survival                                                                                                                                                                                                                                                        | Cell death of blood cells                     | 1.19E-02 | -0.137 |           | 14 | M-3 |
| Connective Tissue Development and Function, Skeletal and Muscular System Development and Function, Tissue Development                                                                                                                                                          | Volume of bone                                | 1.36E-03 |        |           | 14 | M-1 |
| Cell-To-Cell Signaling and Interaction                                                                                                                                                                                                                                         | Interaction of tumor cell lines               | 3.18E-04 | -2.135 | Inhibited | 13 | M-3 |

|                                                                                                                                                                                                                                                                                                                          |                                                 |          |        |           |    |     |
|--------------------------------------------------------------------------------------------------------------------------------------------------------------------------------------------------------------------------------------------------------------------------------------------------------------------------|-------------------------------------------------|----------|--------|-----------|----|-----|
| Lipid Metabolism, Small Molecule Biochemistry                                                                                                                                                                                                                                                                            | Synthesis of eicosanoid                         | 1.75E-02 | -1.887 |           | 13 | M-2 |
| Cellular Development, Embryonic Development, Organismal Development, Tissue Development                                                                                                                                                                                                                                  | Differentiation of mesenchymal stem cells       | 1.58E-03 | -1.833 |           | 13 | M-1 |
| Cell Death and Survival                                                                                                                                                                                                                                                                                                  | Cell death of lymphoma cell lines               | 1.80E-02 | 1.433  |           | 13 | M-2 |
| Cell Cycle, Connective Tissue Development and Function                                                                                                                                                                                                                                                                   | Cell cycle progression of fibroblast cell lines | 5.81E-03 | 1.411  |           | 13 | M-1 |
| Lipid Metabolism, Molecular Transport, Small Molecule Biochemistry                                                                                                                                                                                                                                                       | Concentration of phospholipid                   | 6.87E-03 | 1.098  |           | 13 | M-2 |
| Cell-To-Cell Signaling and Interaction, Hematological System Development and Function                                                                                                                                                                                                                                    | Interaction of lymphocytes                      | 4.45E-03 | -0.631 |           | 13 | M-2 |
| Cell Death and Survival                                                                                                                                                                                                                                                                                                  | Necrosis of prostate cancer cell lines          | 1.35E-02 | 0.066  |           | 13 | M-2 |
| Cellular Assembly and Organization                                                                                                                                                                                                                                                                                       | Remodeling of cytoskeleton                      | 5.02E-04 | -2.028 | Inhibited | 12 | M-1 |
| Cellular Assembly and Organization                                                                                                                                                                                                                                                                                       | Quantity of vesicles                            | 5.75E-03 | -1.975 | Inhibited | 12 | M-1 |
| Cell-To-Cell Signaling and Interaction                                                                                                                                                                                                                                                                                   | Adhesion of breast cancer cell lines            | 4.66E-03 | -1.578 |           | 12 | M-1 |
| Cellular Development, Cellular Growth and Proliferation, Nervous System Development and Function, Tissue Development                                                                                                                                                                                                     | Development of neurons                          | 1.35E-02 | -1.455 |           | 12 | M-3 |
| Lipid Metabolism, Small Molecule Biochemistry                                                                                                                                                                                                                                                                            | Synthesis of prostaglandin                      | 5.27E-03 | -1.442 |           | 12 | M-2 |
| Cellular Development, Cellular Growth and Proliferation, Hematological System Development and Function, Lymphoid Tissue Structure and Development                                                                                                                                                                        | Cell proliferation of T lymphocytes             | 5.63E-03 | -0.365 |           | 12 | M-3 |
| Cellular Development                                                                                                                                                                                                                                                                                                     | Differentiation of carcinoma cell lines         | 6.20E-03 | -2.066 | Inhibited | 11 | M-1 |
| Cellular Assembly and Organization, Nervous System Development and Function, Tissue Morphology                                                                                                                                                                                                                           | Quantity of dendritic spines                    | 2.02E-04 | -1.941 |           | 11 | M-1 |
| Cellular Development, Cellular Growth and Proliferation, Hematological System Development and Function, Lymphoid Tissue Structure and Development                                                                                                                                                                        | NK cell proliferation                           | 6.36E-04 | -1.681 |           | 11 | M-2 |
| Cell-To-Cell Signaling and Interaction                                                                                                                                                                                                                                                                                   | Aggregation of tumor cell lines                 | 2.36E-03 | -1.258 |           | 11 | M-1 |
| Carbohydrate Metabolism, Lipid Metabolism, Molecular Transport, Small Molecule Biochemistry                                                                                                                                                                                                                              | Concentration of phosphatidic acid              | 8.19E-03 | 1.23   |           | 11 | M-2 |
| Cellular Assembly and Organization, Cellular Compromise, Nervous System Development and Function                                                                                                                                                                                                                         | Retraction of neurites                          | 4.95E-03 | -0.905 |           | 11 | M-1 |
| Cell-To-Cell Signaling and Interaction, Hematological System Development and Function                                                                                                                                                                                                                                    | Binding of lymphocytes                          | 1.27E-02 | -0.268 |           | 11 | M-2 |
| Cell Cycle, Cell Morphology, Cellular Assembly and Organization, DNA Replication, Recombination, and Repair                                                                                                                                                                                                              | Morphology of chromosomes                       | 3.61E-04 |        |           | 11 | M-1 |
| Cellular Movement, Skeletal and Muscular System Development and Function                                                                                                                                                                                                                                                 | Migration of smooth muscle cells                | 1.59E-02 | -2.778 | Inhibited | 10 | M-2 |
| Cellular Development                                                                                                                                                                                                                                                                                                     | Maturation of cells                             | 7.51E-03 | -1.912 |           | 10 | M-3 |
| Lipid Metabolism, Molecular Transport, Small Molecule Biochemistry                                                                                                                                                                                                                                                       | Accumulation of phospholipid                    | 5.82E-03 | -1.866 |           | 10 | M-1 |
| Cellular Development                                                                                                                                                                                                                                                                                                     | Differentiation of germ cell tumor cell lines   | 3.50E-03 | -1.831 |           | 10 | M-1 |
| Cellular Assembly and Organization                                                                                                                                                                                                                                                                                       | Remodeling of actin cytoskeleton                | 5.03E-04 | -1.793 |           | 10 | M-1 |
| Amino Acid Metabolism                                                                                                                                                                                                                                                                                                    | Quantity of amino acids                         | 8.25E-03 | 0.949  |           | 10 | M-2 |
| Cell-To-Cell Signaling and Interaction, Cellular Assembly and Organization                                                                                                                                                                                                                                               | Quantity of focal adhesions                     | 1.23E-03 | -0.853 |           | 10 | M-1 |
| Cell Death and Survival                                                                                                                                                                                                                                                                                                  | Apoptosis of hepatoma cell lines                | 2.02E-02 | 0.317  |           | 10 | M-2 |
| Carbohydrate Metabolism, Lipid Metabolism, Molecular Transport, Small Molecule Biochemistry                                                                                                                                                                                                                              | Accumulation of phosphoinositide                | 1.24E-03 | -2.209 | Inhibited | 9  | M-1 |
| Cellular Movement                                                                                                                                                                                                                                                                                                        | Cell movement of dermal cells                   | 3.19E-03 | -2.025 | Inhibited | 9  | M-2 |
| Cellular Growth and Proliferation                                                                                                                                                                                                                                                                                        | Cytostasis of breast cancer cell lines          | 5.94E-03 | -1.36  |           | 9  | M-1 |
| Cell Morphology                                                                                                                                                                                                                                                                                                          | Ruffling                                        | 2.68E-03 | -1.242 |           | 9  | M-2 |
| Cellular Movement                                                                                                                                                                                                                                                                                                        | Migration of ovarian cancer cell lines          | 8.69E-03 | -1.024 |           | 9  | M-1 |
| Cell-mediated Immune Response, Cellular Development, Cellular Function and Maintenance, Cellular Growth and Proliferation, Embryonic Development, Hematological System Development and Function, Hematopoiesis, Lymphoid Tissue Structure and Development, Organ Development, Organismal Development, Tissue Development | Development of regulatory T lymphocytes         | 4.22E-05 | -0.671 |           | 9  | M-2 |
| Skeletal and Muscular System Development and Function                                                                                                                                                                                                                                                                    | Relaxation of muscle                            | 7.68E-03 | -0.488 |           | 9  | M-1 |

|                                                                                                                                                                                                                                                                                                                          |                                                       |          |        |           |   |     |
|--------------------------------------------------------------------------------------------------------------------------------------------------------------------------------------------------------------------------------------------------------------------------------------------------------------------------|-------------------------------------------------------|----------|--------|-----------|---|-----|
| Cellular Development, Cellular Growth and Proliferation                                                                                                                                                                                                                                                                  | Proliferation of prostate cancer cell lines           | 6.18E-03 | -0.176 |           | 9 | M-3 |
| Cell-To-Cell Signaling and Interaction, Hematological System Development and Function                                                                                                                                                                                                                                    | Binding of leukocytes                                 | 1.54E-02 | -0.103 |           | 9 | M-3 |
| Connective Tissue Development and Function, Skeletal and Muscular System Development and Function, Tissue Development                                                                                                                                                                                                    | Volume of trabecular bone                             | 4.52E-03 |        |           | 9 | M-1 |
| Cardiovascular System Development and Function, Embryonic Development, Organ Development, Organismal Development, Tissue Development                                                                                                                                                                                     | Formation of coronary vessel                          | 6.77E-03 |        |           | 9 | M-1 |
| Amino Acid Metabolism, Post-Translational Modification, Small Molecule Biochemistry                                                                                                                                                                                                                                      | Phosphorylation of L-amino acid                       | 7.73E-03 | -2.784 | Inhibited | 8 | M-1 |
| Cell-mediated Immune Response, Cellular Development, Cellular Function and Maintenance, Cellular Growth and Proliferation, Embryonic Development, Hematological System Development and Function, Hematopoiesis, Lymphoid Tissue Structure and Development, Organ Development, Organismal Development, Tissue Development | NK cell development                                   | 1.92E-03 | -2.178 | Inhibited | 8 | M-2 |
| Cellular Movement, Hair and Skin Development and Function                                                                                                                                                                                                                                                                | Cell movement of keratinocytes                        | 5.98E-03 | -1.82  |           | 8 | M-2 |
| Cell-To-Cell Signaling and Interaction                                                                                                                                                                                                                                                                                   | Adhesion of epithelial cells                          | 1.88E-02 | -1.39  |           | 8 | M-2 |
| Cellular Growth and Proliferation                                                                                                                                                                                                                                                                                        | Expansion of cells                                    | 1.16E-02 | -0.832 |           | 8 | M-3 |
| Tissue Morphology                                                                                                                                                                                                                                                                                                        | Remodeling of blood vessel                            | 7.73E-03 | 0.478  |           | 8 | M-1 |
| Cell Cycle                                                                                                                                                                                                                                                                                                               | Interphase of kidney cell lines                       | 6.70E-03 |        |           | 8 | M-1 |
| Organismal Development                                                                                                                                                                                                                                                                                                   | Delay in growth of organism                           | 5.13E-05 |        |           | 8 | M-1 |
| Embryonic Development, Nervous System Development and Function, Organ Development, Organismal Development, Tissue Development                                                                                                                                                                                            | Development of cerebral cortex                        | 5.98E-03 |        |           | 8 | M-2 |
| Digestive System Development and Function, Hepatic System Development and Function, Organ Morphology, Organismal Development                                                                                                                                                                                             | Morphology of liver                                   | 1.96E-02 |        |           | 8 | M-2 |
| Embryonic Development, Nervous System Development and Function, Organ Development, Organismal Development, Tissue Development                                                                                                                                                                                            | Formation of brain                                    | 3.38E-03 |        |           | 8 | M-3 |
| Amino Acid Metabolism, Post-Translational Modification, Small Molecule Biochemistry                                                                                                                                                                                                                                      | Phosphorylation of L-serine                           | 1.21E-03 | -2.619 | Inhibited | 7 | M-1 |
| Cellular Assembly and Organization, DNA Replication, Recombination, and Repair                                                                                                                                                                                                                                           | Formation of chromosome components                    | 7.32E-03 | -2.219 | Inhibited | 7 | M-1 |
| Cardiovascular System Development and Function, Cell-To-Cell Signaling and Interaction                                                                                                                                                                                                                                   | Adhesion of vascular endothelial cells                | 2.53E-02 | -1.769 |           | 7 | M-2 |
| Nervous System Development and Function, Tissue Morphology                                                                                                                                                                                                                                                               | Quantity of interneurons                              | 7.32E-03 | -1.564 |           | 7 | M-1 |
| Nervous System Development and Function                                                                                                                                                                                                                                                                                  | Pathfinding                                           | 3.32E-06 | -1.414 |           | 7 | M-1 |
| Amino Acid Metabolism, Small Molecule Biochemistry                                                                                                                                                                                                                                                                       | Incorporation of amino acids                          | 3.61E-03 | -1.053 |           | 7 | M-1 |
| Cell Cycle, Cell-To-Cell Signaling and Interaction, Cellular Growth and Proliferation                                                                                                                                                                                                                                    | Contact growth inhibition of breast cancer cell lines | 1.94E-03 | -1.01  |           | 7 | M-1 |
| Cell Signaling, Molecular Transport, Small Molecule Biochemistry                                                                                                                                                                                                                                                         | Release of nitric oxide                               | 7.11E-03 | -0.777 |           | 7 | M-2 |
| Lipid Metabolism, Molecular Transport, Small Molecule Biochemistry                                                                                                                                                                                                                                                       | Accumulation of triacylglycerol                       | 2.43E-02 | 0.57   |           | 7 | M-2 |
| Protein Synthesis                                                                                                                                                                                                                                                                                                        | Production of protein                                 | 5.89E-03 | -0.148 |           | 7 | M-2 |
| Embryonic Development, Organismal Development                                                                                                                                                                                                                                                                            | Patterning of embryo                                  | 8.58E-03 |        |           | 7 | M-1 |
| Cell Cycle, Cell Morphology, Cellular Assembly and Organization, DNA Replication, Recombination, and Repair                                                                                                                                                                                                              | Abnormal morphology of chromosomes                    | 5.22E-03 |        |           | 7 | M-1 |
| Organismal Development                                                                                                                                                                                                                                                                                                   | Length of absolute anatomical region                  | 3.17E-03 |        |           | 7 | M-2 |
| Cellular Assembly and Organization, Cellular Function and Maintenance                                                                                                                                                                                                                                                    | Organization of filaments                             | 2.13E-02 |        |           | 7 | M-2 |
| Cardiovascular System Development and Function, Organismal Development                                                                                                                                                                                                                                                   | Development of artery                                 | 1.69E-02 |        |           | 7 | M-2 |
| Cardiovascular System Development and Function, Cell-To-Cell Signaling and Interaction                                                                                                                                                                                                                                   | Adhesion of vascular endothelial cells                | 2.48E-04 | -2.385 | Inhibited | 6 | M-3 |
| Cell-To-Cell Signaling and Interaction, Nervous System Development and Function                                                                                                                                                                                                                                          | Long term depression of hippocampal CA1 region        | 5.04E-03 | -2.236 | Inhibited | 6 | M-1 |

|                                                                                                                                   |                                                        |          |        |           |   |     |
|-----------------------------------------------------------------------------------------------------------------------------------|--------------------------------------------------------|----------|--------|-----------|---|-----|
| Cellular Function and Maintenance, Cellular Growth and Proliferation, Hematological System Development and Function               | Production of lymphocytes                              | 3.17E-03 | -2.15  | Inhibited | 6 | M-2 |
| Organ Morphology, Reproductive System Development and Function                                                                    | Quantity of ovary                                      | 8.12E-03 | -2.126 | Inhibited | 6 | M-2 |
| Cell-To-Cell Signaling and Interaction, Cellular Assembly and Organization, Cellular Function and Maintenance                     | Function of intercellular junctions                    | 3.22E-03 | -2     | Inhibited | 6 | M-1 |
| Nervous System Development and Function                                                                                           | Analgesia                                              | 1.53E-02 | -1.781 |           | 6 | M-2 |
| Cellular Movement                                                                                                                 | Invasion of squamous cell carcinoma cell lines         | 8.12E-03 | -1.706 |           | 6 | M-2 |
| Cell Death and Survival                                                                                                           | Apoptosis of synovial cells                            | 1.03E-03 | 1.467  |           | 6 | M-2 |
| Nervous System Development and Function                                                                                           | Pathfinding of neurons                                 | 2.94E-05 | -1.414 |           | 6 | M-1 |
| DNA Replication, Recombination, and Repair                                                                                        | Breakage of double-stranded DNA                        | 4.06E-03 | -0.896 |           | 6 | M-1 |
| Cell Cycle, DNA Replication, Recombination, and Repair                                                                            | Recombination of chromosomes                           | 1.09E-03 | 0.849  |           | 6 | M-1 |
| Cardiovascular System Development and Function, Cellular Movement                                                                 | Movement of vascular endothelial cells                 | 9.42E-03 | -0.557 |           | 6 | M-3 |
| Hematological System Development and Function, Tissue Morphology                                                                  | Quantity of granulocytes                               | 1.02E-02 | 0.447  |           | 6 | M-3 |
| Cellular Assembly and Organization, Cellular Compromise                                                                           | Disruption of actin cytoskeleton                       | 6.19E-03 | -0.391 |           | 6 | M-1 |
| Cell-To-Cell Signaling and Interaction                                                                                            | Adhesion of squamous cell carcinoma cell lines         | 3.82E-04 | -0.386 |           | 6 | M-1 |
| Carbohydrate Metabolism, Lipid Metabolism, Molecular Transport, Small Molecule Biochemistry                                       | Concentration of choline-phospholipid                  | 5.65E-03 | 0.365  |           | 6 | M-2 |
| Lipid Metabolism, Small Molecule Biochemistry, Vitamin and Mineral Metabolism                                                     | Metabolism of sterol                                   | 7.58E-03 | 0.247  |           | 6 | M-2 |
| Cellular Compromise                                                                                                               | Fragmentation of Golgi apparatus                       | 1.45E-03 | -0.077 |           | 6 | M-2 |
| Cardiovascular System Development and Function, Organ Morphology, Organismal Development                                          | Morphology of right ventricle                          | 5.04E-03 |        |           | 6 | M-1 |
| Cell Cycle                                                                                                                        | Arrest in cell cycle progression of sarcoma cell lines | 4.06E-03 |        |           | 6 | M-1 |
| Cell Morphology, Nervous System Development and Function, Organ Morphology, Organismal Development                                | Morphology of brain cells                              | 7.58E-03 |        |           | 6 | M-2 |
| Organismal Development                                                                                                            | Abnormal morphology of body cavity                     | 8.70E-03 |        |           | 6 | M-2 |
| Nervous System Development and Function, Organ Morphology, Organismal Development                                                 | Morphology of brain                                    | 5.91E-03 |        |           | 6 | M-3 |
| Reproductive System Development and Function                                                                                      | Morphology of reproductive system                      | 8.18E-03 |        |           | 6 | M-3 |
| Cellular Function and Maintenance                                                                                                 | Function of blood cells                                | 5.26E-03 |        |           | 6 | M-3 |
| Cellular Development                                                                                                              | Differentiation of vasculature                         | 3.03E-03 | -2.236 | Inhibited | 5 | M-1 |
| Embryonic Development, Organ Development, Organismal Development, Respiratory System Development and Function, Tissue Development | Maturation of lung                                     | 4.24E-04 | -2     | Inhibited | 5 | M-1 |
| Cell-To-Cell Signaling and Interaction, Nervous System Development and Function                                                   | Long term depression of CA1 neuron                     | 3.03E-03 | -2     | Inhibited | 5 | M-1 |
| RNA Post-Transcriptional Modification                                                                                             | Conformational modification of RNA                     | 1.29E-04 | -1.982 | Inhibited | 5 | M-1 |
| Carbohydrate Metabolism, Lipid Metabolism, Small Molecule Biochemistry                                                            | Phosphorylation of phosphatidylinositol phosphate      | 4.24E-04 | -1.969 | Inhibited | 5 | M-1 |
| Cell Cycle, Cellular Assembly and Organization, DNA Replication, Recombination, and Repair                                        | Formation of centriole                                 | 8.60E-03 | -1.969 | Inhibited | 5 | M-1 |
| Lipid Metabolism, Small Molecule Biochemistry                                                                                     | Catabolism of lipid                                    | 2.47E-02 | -1.941 |           | 5 | M-2 |
| Organ Morphology, Reproductive System Development and Function                                                                    | Quantity of ovarian follicle                           | 1.69E-02 | -1.892 |           | 5 | M-2 |
| Cellular Movement, Embryonic Development                                                                                          | Cell movement of embryonic cells                       | 2.08E-03 | -1.387 |           | 5 | M-3 |
| Cellular Assembly and Organization, Cellular Compromise, Cellular Function and Maintenance                                        | Destabilization of microtubules                        | 4.06E-03 | -1.359 |           | 5 | M-1 |
| Cell-mediated Immune Response, Lymphoid Tissue Structure and Development                                                          | Frequency of T lymphocytes                             | 1.69E-02 | 1.248  |           | 5 | M-2 |
| Cardiovascular System Development and Function, Cell-To-Cell Signaling and Interaction                                            | Activation of endothelial cells                        | 2.19E-02 | -1.242 |           | 5 | M-2 |
| Cellular Assembly and Organization, Cellular Function and Maintenance                                                             | Quantity of filopodia                                  | 2.61E-03 | -1.172 |           | 5 | M-2 |

|                                                                                                                                                                            |                                                |          |        |           |   |     |
|----------------------------------------------------------------------------------------------------------------------------------------------------------------------------|------------------------------------------------|----------|--------|-----------|---|-----|
| Cell-To-Cell Signaling and Interaction, Hematological System Development and Function, Humoral Immune Response                                                             | Interaction of B lymphocytes                   | 6.04E-03 | -1.067 |           | 5 | M-2 |
| Tissue Development, Tissue Morphology                                                                                                                                      | Expansion of epithelial tissue                 | 4.52E-03 | -0.882 |           | 5 | M-2 |
| Cell Cycle                                                                                                                                                                 | Senescence of epithelial cell lines            | 3.03E-03 | 0.848  |           | 5 | M-1 |
| Lipid Metabolism, Molecular Transport, Small Molecule Biochemistry                                                                                                         | Secretion of steroid hormone                   | 9.34E-03 | -0.346 |           | 5 | M-2 |
| Organ Morphology, Respiratory System Development and Function                                                                                                              | Quantity of pulmonary alveolus                 | 4.06E-03 | 0.343  |           | 5 | M-1 |
| Behavior                                                                                                                                                                   | Anxiety                                        | 3.30E-03 | 0.277  |           | 5 | M-3 |
| Cell-To-Cell Signaling and Interaction, Connective Tissue Development and Function                                                                                         | Response of fibroblast cell lines              | 6.82E-03 | -0.152 |           | 5 | M-1 |
| Cell-To-Cell Signaling and Interaction, Hematological System Development and Function                                                                                      | Response of CD4+ T-lymphocytes                 | 7.45E-04 | -0.152 |           | 5 | M-2 |
| Cell Morphology, Skeletal and Muscular System Development and Function                                                                                                     | Contraction of muscle cells                    | 1.27E-02 | -0.152 |           | 5 | M-2 |
| Cardiovascular System Development and Function, Cellular Function and Maintenance, Tissue Development                                                                      | Function of endothelial cells                  | 1.05E-03 |        |           | 5 | M-1 |
| Cell-To-Cell Signaling and Interaction, Cellular Assembly and Organization, Cellular Function and Maintenance, Nervous System Development and Function, Tissue Development | Function of synapse                            | 4.06E-03 |        |           | 5 | M-1 |
| Cell Morphology, Cellular Assembly and Organization, Cellular Function and Maintenance                                                                                     | Formation of microspikes                       | 8.60E-03 |        |           | 5 | M-1 |
| Cell Cycle, DNA Replication, Recombination, and Repair                                                                                                                     | Synapsis                                       | 3.03E-03 |        |           | 5 | M-1 |
| Cell Morphology, Organ Morphology                                                                                                                                          | Morphology of exocrine cells                   | 6.82E-03 |        |           | 5 | M-1 |
| Cell-To-Cell Signaling and Interaction, Connective Tissue Development and Function                                                                                         | Response of fibroblasts                        | 8.60E-03 |        |           | 5 | M-1 |
| Cell Cycle, DNA Replication, Recombination, and Repair                                                                                                                     | Homologous recombination of chromosomes        | 5.31E-03 |        |           | 5 | M-1 |
| Cell Morphology                                                                                                                                                            | Morphology of breast cancer cell lines         | 1.81E-02 |        |           | 5 | M-2 |
| Skeletal and Muscular System Development and Function                                                                                                                      | Mineralization of bone                         | 6.62E-03 |        |           | 5 | M-2 |
| Organ Morphology, Reproductive System Development and Function                                                                                                             | Size of genital organ                          | 2.47E-02 |        |           | 5 | M-2 |
| Cell Morphology                                                                                                                                                            | Shape change of plasma membrane                | 1.27E-02 |        |           | 5 | M-2 |
| Molecular Transport, Protein Trafficking                                                                                                                                   | Transport of protein                           | 1.69E-02 |        |           | 5 | M-2 |
| Cell Death and Survival, Cell Morphology, Nervous System Development and Function, Organ Morphology, Organismal Development                                                | Loss of brain cells                            | 4.99E-03 |        |           | 5 | M-2 |
| Cell Morphology, Cellular Assembly and Organization                                                                                                                        | Morphology of actin cytoskeleton               | 1.47E-02 |        |           | 5 | M-2 |
| Cell-mediated Immune Response, Cellular Movement, Hematological System Development and Function, Immune Cell Trafficking                                                   | Cell movement of helper T lymphocytes          | 7.90E-03 |        |           | 5 | M-2 |
| Cell Cycle                                                                                                                                                                 | G1 phase of carcinoma cell lines               | 4.07E-03 |        |           | 5 | M-2 |
| Cell-To-Cell Signaling and Interaction, Hematological System Development and Function                                                                                      | Binding of T lymphocytes                       | 6.96E-03 |        |           | 5 | M-3 |
| Cell Cycle, DNA Replication, Recombination, and Repair                                                                                                                     | Double-stranded DNA break repair of DNA lesion | 2.95E-03 | -2     | Inhibited | 4 | M-1 |
| Cellular Movement, Connective Tissue Development and Function                                                                                                              | Chemotaxis of fibroblasts                      | 2.15E-02 | -2     | Inhibited | 4 | M-2 |
| Tissue Development                                                                                                                                                         | Deposition of extracellular matrix             | 2.92E-03 | -2     | Inhibited | 4 | M-2 |
| Cellular Assembly and Organization, Cellular Function and Maintenance                                                                                                      | Nucleation of microtubules                     | 3.95E-03 | -1.982 | Inhibited | 4 | M-2 |
| Organismal Development                                                                                                                                                     | Secretion of mucus                             | 7.53E-03 | -1.964 | Inhibited | 4 | M-2 |
| Cellular Growth and Proliferation                                                                                                                                          | Cytostasis of prostate cancer cell lines       | 6.24E-03 | -1.091 |           | 4 | M-1 |
| Cellular Movement, Embryonic Development                                                                                                                                   | Migration of embryonic cells                   | 7.58E-03 | -1.067 |           | 4 | M-3 |
| Cellular Assembly and Organization                                                                                                                                         | Clustering of vesicles                         | 2.95E-03 | -1     |           | 4 | M-1 |
| Cellular Growth and Proliferation, Connective Tissue Development and Function, Tissue Development                                                                          | Proliferation of synovial cells                | 2.51E-02 | -1     |           | 4 | M-2 |
| Cellular Movement                                                                                                                                                          | Cell movement of lymphoma cell lines           | 3.14E-03 | -1     |           | 4 | M-3 |
| Lipid Metabolism, Small Molecule Biochemistry                                                                                                                              | Activation of lipid                            | 1.68E-02 | -0.924 |           | 4 | M-2 |
| Endocrine System Development and Function, Lipid Metabolism, Molecular Transport, Small Molecule Biochemistry                                                              | Secretion of aldosterone                       | 7.53E-03 | -0.911 |           | 4 | M-2 |
| Cellular Development, Skeletal and Muscular System Development and Function, Tissue Development                                                                            | Differentiation of skeletal muscle cells       | 4.39E-03 | -0.762 |           | 4 | M-1 |

|                                                                                                                                                                                                                                                                                |                                                     |          |        |   |     |
|--------------------------------------------------------------------------------------------------------------------------------------------------------------------------------------------------------------------------------------------------------------------------------|-----------------------------------------------------|----------|--------|---|-----|
| Cell Death and Survival                                                                                                                                                                                                                                                        | Cell death of superior cervical ganglion neurons    | 6.24E-03 | 0.762  | 4 | M-1 |
| Cell-To-Cell Signaling and Interaction                                                                                                                                                                                                                                         | Adhesion of lymphoma cell lines                     | 1.12E-03 | -0.689 | 4 | M-3 |
| Cell-To-Cell Signaling and Interaction, Cellular Assembly and Organization                                                                                                                                                                                                     | Cell-cell contact of breast cancer cell lines       | 4.39E-03 | -0.218 | 4 | M-1 |
| Cellular Growth and Proliferation                                                                                                                                                                                                                                              | Cytostasis of carcinoma cell lines                  | 2.10E-03 | -0.192 | 4 | M-2 |
| Cell-To-Cell Signaling and Interaction, Cellular Assembly and Organization                                                                                                                                                                                                     | Cell-cell adhesion of carcinoma cell lines          | 4.39E-03 | -0.152 | 4 | M-1 |
| Cellular Assembly and Organization, Cellular Compromise                                                                                                                                                                                                                        | Disruption of cytoskeleton                          | 2.53E-04 | 0.152  | 4 | M-3 |
| Protein Synthesis                                                                                                                                                                                                                                                              | Production of cytokine                              | 1.16E-02 | 0.14   | 4 | M-2 |
| Cellular Movement                                                                                                                                                                                                                                                              | Cell movement of squamous cell carcinoma cell lines | 5.66E-03 | 0.124  | 4 | M-3 |
| Cell-To-Cell Signaling and Interaction                                                                                                                                                                                                                                         | Response of splenocytes                             | 1.75E-03 | -0.106 | 4 | M-2 |
| Cell Morphology, Cellular Development, Connective Tissue Development and Function                                                                                                                                                                                              | Branching of fibroblast cell lines                  | 5.77E-04 | 0      | 4 | M-1 |
| Cellular Assembly and Organization, Hair and Skin Development and Function                                                                                                                                                                                                     | Aggregation of melanosomes                          | 6.24E-03 | 0      | 4 | M-1 |
| Organ Morphology, Respiratory System Development and Function, Tissue Morphology                                                                                                                                                                                               | Quantity of alveolar epithelium                     | 6.24E-03 | 0      | 4 | M-1 |
| Cardiovascular System Development and Function, Organ Development, Organ Morphology, Skeletal and Muscular System Development and Function                                                                                                                                     | Contraction of cardiac muscle                       | 2.33E-02 | 0      | 4 | M-2 |
| Cell Morphology, Cellular Assembly and Organization, Cellular Development, Cellular Function and Maintenance, Cellular Growth and Proliferation, Embryonic Development, Nervous System Development and Function, Organismal Development, Tissue Development, Tissue Morphology | Size of dendritic spines                            | 4.39E-03 |        | 4 | M-1 |
| Cell Cycle, Skeletal and Muscular System Development and Function                                                                                                                                                                                                              | Mitosis of smooth muscle cells                      | 6.24E-03 |        | 4 | M-1 |
| Behavior                                                                                                                                                                                                                                                                       | Stereotypy                                          | 6.24E-03 |        | 4 | M-1 |
| Cell Cycle, DNA Replication, Recombination, and Repair                                                                                                                                                                                                                         | Homologous pairing of chromosomes                   | 8.54E-03 |        | 4 | M-1 |
| Cell Morphology, Cellular Assembly and Organization, Cellular Development, Cellular Function and Maintenance, Cellular Growth and Proliferation, Nervous System Development and Function, Organismal Development, Tissue Development                                           | Development of sensory projections                  | 5.77E-04 |        | 4 | M-1 |
| Embryonic Development, Organismal Development, Tissue Development                                                                                                                                                                                                              | Development of second branchial arch                | 6.24E-03 |        | 4 | M-1 |
| RNA Post-Transcriptional Modification                                                                                                                                                                                                                                          | Unwinding of RNA                                    | 1.09E-03 |        | 4 | M-1 |
| Cell-To-Cell Signaling and Interaction, Cellular Assembly and Organization, Cellular Development, Cellular Function and Maintenance, Cellular Growth and Proliferation, Nervous System Development and Function, Tissue Development                                            | Formation of excitatory synapses                    | 2.95E-03 |        | 4 | M-1 |
| Cellular Movement, Nervous System Development and Function                                                                                                                                                                                                                     | Pathfinding of axons                                | 5.77E-04 |        | 4 | M-1 |
| Endocrine System Development and Function, Organ Morphology, Organismal Development                                                                                                                                                                                            | Size of thyroid gland                               | 2.61E-04 |        | 4 | M-1 |
| Cellular Movement                                                                                                                                                                                                                                                              | Distribution of cells                               | 1.40E-02 |        | 4 | M-2 |
| Cell-mediated Immune Response, Cellular Movement, Hematological System Development and Function, Immune Cell Trafficking, Lymphoid Tissue Structure and Development                                                                                                            | Homing of helper T lymphocytes                      | 3.41E-03 |        | 4 | M-2 |
| Cell-To-Cell Signaling and Interaction, Hematological System Development and Function, Humoral Immune Response                                                                                                                                                                 | Binding of B lymphocytes                            | 2.33E-02 |        | 4 | M-2 |
| Reproductive System Development and Function                                                                                                                                                                                                                                   | Size of reproductive tract                          | 3.41E-03 |        | 4 | M-2 |
| Cell Death and Survival                                                                                                                                                                                                                                                        | Cell death of skin cancer cell lines                | 4.55E-03 |        | 4 | M-2 |
| Hair and Skin Development and Function                                                                                                                                                                                                                                         | Re-epithelialization                                | 1.16E-02 |        | 4 | M-2 |
| Cell Death and Survival                                                                                                                                                                                                                                                        | Apoptosis of intestinal cell lines                  | 1.54E-02 |        | 4 | M-2 |
| Cellular Assembly and Organization                                                                                                                                                                                                                                             | Engulfment of vesicles                              | 1.16E-02 |        | 4 | M-2 |
| Cell Death and Survival, Nervous System Development and Function                                                                                                                                                                                                               | Cell viability of hippocampal neurons               | 1.28E-02 |        | 4 | M-2 |
| Organismal Development                                                                                                                                                                                                                                                         | Production of mucus                                 | 2.33E-02 |        | 4 | M-2 |
| Amino Acid Metabolism, Molecular Transport, Small Molecule Biochemistry                                                                                                                                                                                                        | Quantity of homocysteine                            | 2.49E-03 |        | 4 | M-2 |
| Cell Death and Survival, Cellular Compromise                                                                                                                                                                                                                                   | Fragmentation of nucleus                            | 2.15E-02 |        | 4 | M-2 |

|                                                                                                                                                                                                                                                                                                                          |                                                            |          |   |     |
|--------------------------------------------------------------------------------------------------------------------------------------------------------------------------------------------------------------------------------------------------------------------------------------------------------------------------|------------------------------------------------------------|----------|---|-----|
| Cell Morphology, Nervous System Development and Function, Organ Morphology, Organismal Development                                                                                                                                                                                                                       | Morphology of cerebral cortex cells                        | 1.54E-02 | 4 | M-2 |
| Cellular Assembly and Organization                                                                                                                                                                                                                                                                                       | Quantity of cellular inclusion bodies                      | 8.44E-03 | 4 | M-2 |
| Cellular Assembly and Organization, Cellular Function and Maintenance                                                                                                                                                                                                                                                    | Organization of microtubules                               | 2.15E-02 | 4 | M-2 |
| Cell Morphology, Nervous System Development and Function                                                                                                                                                                                                                                                                 | Morphology of central nervous system cells                 | 6.34E-03 | 4 | M-3 |
| Lipid Metabolism, Small Molecule Biochemistry, Vitamin and Mineral Metabolism                                                                                                                                                                                                                                            | Synthesis of steroid hormone                               | 1.61E-03 | 4 | M-3 |
| Cell-To-Cell Signaling and Interaction, Hematological System Development and Function, Immune Cell Trafficking                                                                                                                                                                                                           | Binding of antigen presenting cells                        | 7.58E-03 | 4 | M-3 |
| Cellular Movement, Reproductive System Development and Function                                                                                                                                                                                                                                                          | Cell movement of gonadal cell lines                        | 3.14E-03 | 4 | M-3 |
| Cellular Movement                                                                                                                                                                                                                                                                                                        | Cell rolling of blood cells                                | 3.76E-03 | 4 | M-3 |
| Organ Development, Reproductive System Development and Function                                                                                                                                                                                                                                                          | Growth of genital organ                                    | 1.02E-02 | 4 | M-3 |
| Cell-mediated Immune Response, Cellular Development, Cellular Function and Maintenance, Cellular Growth and Proliferation, Embryonic Development, Hematological System Development and Function, Hematopoiesis, Lymphoid Tissue Structure and Development, Organ Development, Organismal Development, Tissue Development | T cell development                                         | 5.55E-03 | 4 | M-5 |
| Organismal Development                                                                                                                                                                                                                                                                                                   | Patterning of vessel                                       | 8.37E-03 | 3 | M-1 |
| Molecular Transport, RNA Trafficking                                                                                                                                                                                                                                                                                     | Nuclear export of mRNA                                     | 8.37E-03 | 3 | M-1 |
| Carbohydrate Metabolism, Drug Metabolism, Small Molecule Biochemistry                                                                                                                                                                                                                                                    | Synthesis of heparan sulfate                               | 8.37E-03 | 3 | M-1 |
| Organ Morphology                                                                                                                                                                                                                                                                                                         | Enlargement of third cerebral ventricle                    | 1.11E-03 | 3 | M-1 |
| Cell-To-Cell Signaling and Interaction, Cellular Assembly and Organization, Reproductive System Development and Function                                                                                                                                                                                                 | Cell-cell adhesion of breast cell lines                    | 5.03E-03 | 3 | M-1 |
| Cellular Assembly and Organization, Hair and Skin Development and Function                                                                                                                                                                                                                                               | Clustering of melanosomes                                  | 5.03E-03 | 3 | M-1 |
| Carbohydrate Metabolism, Lipid Metabolism, Small Molecule Biochemistry                                                                                                                                                                                                                                                   | Synthesis of phosphatidylinositol 5-phosphate              | 1.11E-03 | 3 | M-1 |
| Cardiovascular System Development and Function                                                                                                                                                                                                                                                                           | Endothelial barrier function of vascular endothelial cells | 5.03E-03 | 3 | M-1 |
| Embryonic Development, Organismal Development, Tissue Development                                                                                                                                                                                                                                                        | Formation of somites                                       | 2.64E-03 | 3 | M-1 |
| Nervous System Development and Function, Organ Morphology, Tissue Morphology                                                                                                                                                                                                                                             | Quantity of hippocampal neurons                            | 2.64E-03 | 3 | M-1 |
| Cell-To-Cell Signaling and Interaction, Cellular Assembly and Organization, Cellular Function and Maintenance, Nervous System Development and Function, Tissue Development                                                                                                                                               | Function of excitatory synapses                            | 2.64E-03 | 3 | M-1 |
| Amino Acid Metabolism, Post-Translational Modification, Small Molecule Biochemistry                                                                                                                                                                                                                                      | Conversion of arginine                                     | 5.03E-03 | 3 | M-1 |
| Carbohydrate Metabolism, Lipid Metabolism, Small Molecule Biochemistry                                                                                                                                                                                                                                                   | Synthesis of phosphatidylserine                            | 5.03E-03 | 3 | M-1 |
| Cellular Assembly and Organization, Nervous System Development and Function, Tissue Morphology                                                                                                                                                                                                                           | Quantity of neurofibrillary tangles                        | 8.37E-03 | 3 | M-1 |
| Cell Morphology, Connective Tissue Development and Function, Hematopoiesis                                                                                                                                                                                                                                               | Mineralization of bone marrow stromal cells                | 8.37E-03 | 3 | M-1 |
| Embryonic Development, Nervous System Development and Function, Organ Development, Organismal Development, Tissue Development                                                                                                                                                                                            | Development of ophthalmic branch of trigeminal ganglion    | 1.11E-03 | 3 | M-1 |
| Behavior                                                                                                                                                                                                                                                                                                                 | Hippocampal learning                                       | 8.37E-03 | 3 | M-1 |
| Cell-To-Cell Signaling and Interaction, Cellular Assembly and Organization, Renal and Urological System Development and Function                                                                                                                                                                                         | Cell-cell adhesion of kidney cell lines                    | 8.37E-03 | 3 | M-1 |
| Cell Cycle                                                                                                                                                                                                                                                                                                               | Mitotic index of tumor cell lines                          | 5.03E-03 | 3 | M-1 |
| Cell-To-Cell Signaling and Interaction, Nervous System Development and Function                                                                                                                                                                                                                                          | Activation of Muller glia                                  | 5.03E-03 | 3 | M-1 |



|                                                                                                                                                                                         |                                                                   |          |   |     |
|-----------------------------------------------------------------------------------------------------------------------------------------------------------------------------------------|-------------------------------------------------------------------|----------|---|-----|
| Cell-To-Cell Signaling and Interaction, Hepatic System Development and Function                                                                                                         | Adhesion of hepatocytes                                           | 5.03E-03 | 3 | M-1 |
| Carbohydrate Metabolism, Lipid Metabolism, Molecular Transport, Small Molecule Biochemistry                                                                                             | Quantity of phosphatidylinositol 5-phosphate                      | 5.03E-03 | 3 | M-1 |
| Carbohydrate Metabolism, Lipid Metabolism, Molecular Transport, Small Molecule Biochemistry                                                                                             | Accumulation of phosphatidylinositol phosphate                    | 1.11E-03 | 3 | M-1 |
| Connective Tissue Development and Function, Embryonic Development, Organ Development, Organismal Development, Skeletal and Muscular System Development and Function, Tissue Development | Formation of occipital bone                                       | 2.93E-04 | 3 | M-1 |
| Carbohydrate Metabolism, Lipid Metabolism, Small Molecule Biochemistry                                                                                                                  | Phosphorylation of phosphatidylinositol diphosphate               | 8.37E-03 | 3 | M-1 |
| Cell Death and Survival                                                                                                                                                                 | Survival of kidney cancer cell lines                              | 8.37E-03 | 3 | M-1 |
| Cellular Development, Nervous System Development and Function, Tissue Development                                                                                                       | Differentiation of hair cells                                     | 5.03E-03 | 3 | M-1 |
| Cell-To-Cell Signaling and Interaction, Nervous System Development and Function                                                                                                         | Long term depression of collateral synapses                       | 8.37E-03 | 3 | M-1 |
| Carbohydrate Metabolism, Lipid Metabolism, Small Molecule Biochemistry                                                                                                                  | Phosphorylation of phosphatidylinositol 3-phosphate               | 8.37E-03 | 3 | M-1 |
| Cellular Movement                                                                                                                                                                       | Rearrangement of cells                                            | 8.37E-03 | 3 | M-1 |
| Cell Cycle                                                                                                                                                                              | Arrest in cell cycle progression of sarcoma cell lines            | 2.22E-02 | 3 | M-2 |
| Cardiovascular System Development and Function, Cell Morphology, Cellular Movement                                                                                                      | Cell spreading of endothelial cells                               | 2.22E-02 | 3 | M-2 |
| Cellular Assembly and Organization, Cellular Function and Maintenance, Cellular Movement, Nervous System Development and Function                                                       | Endocytosis of synaptic vesicles                                  | 1.17E-02 | 3 | M-2 |
| Cellular Movement, Hematological System Development and Function, Immune Cell Trafficking                                                                                               | Distribution of lymphocytes                                       | 8.31E-04 | 3 | M-2 |
| Cellular Assembly and Organization                                                                                                                                                      | Formation of endosomes                                            | 8.51E-03 | 3 | M-2 |
| Cell Death and Survival                                                                                                                                                                 | Apoptosis of skin cancer cell lines                               | 1.17E-02 | 3 | M-2 |
| Cell Morphology, Nervous System Development and Function, Organ Morphology, Organismal Development, Tissue Morphology                                                                   | Morphology of pyramidal neurons                                   | 5.91E-03 | 3 | M-2 |
| Lipid Metabolism, Small Molecule Biochemistry                                                                                                                                           | Transmission of sterol                                            | 1.71E-03 | 3 | M-2 |
| Cellular Development, Cellular Growth and Proliferation, Nervous System Development and Function, Tissue Development                                                                    | Myelination of Schwann cells                                      | 3.86E-03 | 3 | M-2 |
| Cell Cycle                                                                                                                                                                              | Ploidy of epithelial cells                                        | 1.00E-02 | 3 | M-2 |
| Cellular Movement, Hematological System Development and Function, Immune Cell Trafficking                                                                                               | Emigration of antigen presenting cells                            | 3.86E-03 | 3 | M-2 |
| Cellular Movement                                                                                                                                                                       | Release of blood cells                                            | 8.51E-03 | 3 | M-2 |
| Carbohydrate Metabolism, Molecular Transport                                                                                                                                            | Efflux of carbohydrate                                            | 1.00E-02 | 3 | M-2 |
| Cell Cycle                                                                                                                                                                              | G1 phase of epidermal cells                                       | 1.71E-03 | 3 | M-2 |
| Organ Morphology, Organismal Development, Reproductive System Development and Function                                                                                                  | Size of preantral follicle                                        | 1.57E-04 | 3 | M-2 |
| Embryonic Development, Hair and Skin Development and Function, Organ Development, Organ Morphology, Organismal Development, Tissue Development                                          | Morphogenesis of hair follicle                                    | 1.22E-03 | 3 | M-2 |
| Cellular Development                                                                                                                                                                    | Epithelial-mesenchymal transition of colorectal cancer cell lines | 1.98E-02 | 3 | M-2 |
| Organ Morphology, Reproductive System Development and Function                                                                                                                          | Morphology of seminal vesicle                                     | 1.75E-02 | 3 | M-2 |
| Behavior                                                                                                                                                                                | Limb claspings                                                    | 4.82E-03 | 3 | M-2 |
| Cell Death and Survival                                                                                                                                                                 | Anoikis of intestinal cell lines                                  | 1.17E-02 | 3 | M-2 |
| Lipid Metabolism, Molecular Transport, Small Molecule Biochemistry                                                                                                                      | Quantity of ganglioside GM1                                       | 1.71E-03 | 3 | M-2 |
| Cellular Development, Cellular Growth and Proliferation, Connective Tissue Development and Function, Skeletal and Muscular System Development and Function, Tissue Development          | Formation of colony forming unit osteoblasts                      | 3.08E-04 | 3 | M-2 |
| Lipid Metabolism, Small Molecule Biochemistry                                                                                                                                           | Synthesis of thromboxane B2                                       | 3.02E-03 | 3 | M-2 |
| Cell Morphology, Cellular Assembly and Organization                                                                                                                                     | Morphology of Golgi apparatus                                     | 1.54E-02 | 3 | M-2 |

|                                                                                                                                                                                                                                                                                                                          |                                                            |          |   |     |
|--------------------------------------------------------------------------------------------------------------------------------------------------------------------------------------------------------------------------------------------------------------------------------------------------------------------------|------------------------------------------------------------|----------|---|-----|
| Organ Morphology, Organismal Development, Reproductive System Development and Function                                                                                                                                                                                                                                   | Morphology of uterus                                       | 1.17E-02 | 3 | M-2 |
| Cell Death and Survival, Hematological System Development and Function                                                                                                                                                                                                                                                   | Cell viability of natural killer cells                     | 1.98E-02 | 3 | M-2 |
| Carbohydrate Metabolism, Lipid Metabolism, Small Molecule Biochemistry                                                                                                                                                                                                                                                   | Dephosphorylation of phosphoinositide                      | 5.91E-03 | 3 | M-2 |
| Cell Cycle                                                                                                                                                                                                                                                                                                               | Mitogenesis of leukocytes                                  | 1.17E-02 | 3 | M-2 |
| DNA Replication, Recombination, and Repair                                                                                                                                                                                                                                                                               | Synthesis of genomic DNA                                   | 2.22E-02 | 3 | M-2 |
| Cellular Development, Cellular Growth and Proliferation, Embryonic Development                                                                                                                                                                                                                                           | Arrest in proliferation of embryonic cell lines            | 1.75E-02 | 3 | M-2 |
| Cell-mediated Immune Response, Cellular Movement, Hematological System Development and Function, Immune Cell Trafficking                                                                                                                                                                                                 | Cell movement of Th2 cells                                 | 1.17E-02 | 3 | M-2 |
| Cell Death and Survival                                                                                                                                                                                                                                                                                                  | Apoptosis of endometrial cancer cell lines                 | 8.51E-03 | 3 | M-2 |
| Amino Acid Metabolism, Hair and Skin Development and Function, Small Molecule Biochemistry                                                                                                                                                                                                                               | Synthesis of melanin                                       | 1.17E-02 | 3 | M-2 |
| Cellular Movement                                                                                                                                                                                                                                                                                                        | Movement of myeloma cell lines                             | 1.17E-02 | 3 | M-2 |
| Protein Synthesis                                                                                                                                                                                                                                                                                                        | Expression of reporter protein                             | 1.00E-02 | 3 | M-2 |
| Cellular Development, Cellular Growth and Proliferation, Embryonic Development, Hematological System Development and Function, Hematopoiesis, Humoral Immune Response, Lymphoid Tissue Structure and Development, Organ Development, Organismal Development, Tissue Development                                          | Differentiation of Ab-secreting B cells                    | 3.02E-03 | 3 | M-2 |
| Cell-To-Cell Signaling and Interaction, Cellular Growth and Proliferation                                                                                                                                                                                                                                                | Co-stimulation of blood cells                              | 7.14E-03 | 3 | M-2 |
| Organ Morphology, Reproductive System Development and Function                                                                                                                                                                                                                                                           | Quantity of antral follicle                                | 2.48E-02 | 3 | M-2 |
| Cell-mediated Immune Response, Hematopoiesis, Lymphoid Tissue Structure and Development                                                                                                                                                                                                                                  | Frequency of thymocytes                                    | 3.86E-03 | 3 | M-2 |
| Cell Morphology, Skeletal and Muscular System Development and Function                                                                                                                                                                                                                                                   | Contraction of smooth muscle cells                         | 5.91E-03 | 3 | M-2 |
| Cell-mediated Immune Response, Cellular Development, Cellular Function and Maintenance, Cellular Growth and Proliferation, Embryonic Development, Hematological System Development and Function, Hematopoiesis, Lymphoid Tissue Structure and Development, Organ Development, Organismal Development, Tissue Development | Generation of Th1 cells                                    | 3.86E-03 | 3 | M-2 |
| Cellular Movement                                                                                                                                                                                                                                                                                                        | Cell movement of prostate cell lines                       | 4.82E-03 | 3 | M-2 |
| Cell-mediated Immune Response, Cellular Development, Cellular Function and Maintenance, Cellular Growth and Proliferation, Embryonic Development, Hematological System Development and Function, Hematopoiesis, Lymphoid Tissue Structure and Development, Organ Development, Organismal Development, Tissue Development | Differentiation of cytotoxic T cells                       | 3.86E-03 | 3 | M-2 |
| Organismal Development                                                                                                                                                                                                                                                                                                   | Oversecretion of mucus                                     | 5.91E-03 | 3 | M-2 |
| Cell Death and Survival, Cell Morphology, Nervous System Development and Function, Organ Morphology, Organismal Development                                                                                                                                                                                              | Loss of cerebral cortex cells                              | 1.75E-02 | 3 | M-2 |
| Cell-To-Cell Signaling and Interaction, Cellular Growth and Proliferation, Hematological System Development and Function                                                                                                                                                                                                 | Induction of antigen presenting cells                      | 1.98E-02 | 3 | M-2 |
| Lipid Metabolism, Molecular Transport, Small Molecule Biochemistry                                                                                                                                                                                                                                                       | Accumulation of cholesterol ester                          | 1.75E-02 | 3 | M-2 |
| Cell Death and Survival, Embryonic Development                                                                                                                                                                                                                                                                           | Apoptosis of trophoblast cells                             | 3.02E-03 | 3 | M-2 |
| Cell Cycle                                                                                                                                                                                                                                                                                                               | Arrest in cell cycle progression of bone cancer cell lines | 1.98E-02 | 3 | M-2 |
| Cell Morphology, Cellular Function and Maintenance                                                                                                                                                                                                                                                                       | Permeability of colorectal cancer cell lines               | 1.35E-02 | 3 | M-2 |
| Lipid Metabolism, Small Molecule Biochemistry, Vitamin and Mineral Metabolism                                                                                                                                                                                                                                            | Catabolism of sterol                                       | 8.31E-04 | 3 | M-2 |
| DNA Replication, Recombination, and Repair                                                                                                                                                                                                                                                                               | Breakage of double-stranded DNA                            | 8.13E-04 | 3 | M-3 |

|                                                                                                                                                                                                                                                                                                                          |                                                  |          |   |     |
|--------------------------------------------------------------------------------------------------------------------------------------------------------------------------------------------------------------------------------------------------------------------------------------------------------------------------|--------------------------------------------------|----------|---|-----|
| Cell-To-Cell Signaling and Interaction, Cellular Assembly and Organization                                                                                                                                                                                                                                               | Cell-cell contact of tumor cell lines            | 1.34E-02 | 3 | M-3 |
| Cellular Development, Nervous System Development and Function, Tissue Development                                                                                                                                                                                                                                        | Maturation of neurons                            | 1.07E-02 | 3 | M-3 |
| Cell Morphology, Cellular Movement, Reproductive System Development and Function                                                                                                                                                                                                                                         | Cell spreading of gonadal cell lines             | 1.92E-04 | 3 | M-3 |
| Cell Cycle                                                                                                                                                                                                                                                                                                               | Delay in mitosis of tumor cell lines             | 1.16E-03 | 3 | M-3 |
| Cell-To-Cell Signaling and Interaction, Cellular Assembly and Organization, Embryonic Development, Organ Development, Organismal Development, Skeletal and Muscular System Development and Function, Tissue Development                                                                                                  | Fusion of myoblasts                              | 1.90E-03 | 3 | M-3 |
| Cellular Development, Embryonic Development, Organ Development, Organismal Development, Reproductive System Development and Function                                                                                                                                                                                     | Maturation of oocytes                            | 3.89E-03 | 3 | M-3 |
| Cell-To-Cell Signaling and Interaction, Hematological System Development and Function, Hematopoiesis                                                                                                                                                                                                                     | Binding of hematopoietic progenitor cells        | 4.75E-03 | 3 | M-3 |
| Cell Cycle                                                                                                                                                                                                                                                                                                               | Arrest in metaphase                              | 2.35E-04 | 3 | M-3 |
| Cellular Assembly and Organization                                                                                                                                                                                                                                                                                       | Nucleation of filaments                          | 3.13E-03 | 3 | M-3 |
| Cell Cycle, Reproductive System Development and Function                                                                                                                                                                                                                                                                 | Meiosis of germ cells                            | 5.72E-03 | 3 | M-3 |
| Cell Cycle                                                                                                                                                                                                                                                                                                               | Aneuploidy                                       | 1.51E-02 | 3 | M-3 |
| Cellular Development, Embryonic Development, Organ Development, Organismal Development, Reproductive System Development and Function, Tissue Development                                                                                                                                                                 | Differentiation of mammary gland                 | 1.16E-03 | 3 | M-3 |
| Organismal Development                                                                                                                                                                                                                                                                                                   | Morphogenesis of gland                           | 3.89E-03 | 3 | M-3 |
| Hematological System Development and Function, Lymphoid Tissue Structure and Development, Tissue Morphology                                                                                                                                                                                                              | Quantity of Th17 cells                           | 7.58E-03 | 3 | M-3 |
| Organ Morphology, Reproductive System Development and Function                                                                                                                                                                                                                                                           | Size of gonad                                    | 9.30E-03 | 3 | M-3 |
| Cardiovascular System Development and Function, Tissue Morphology                                                                                                                                                                                                                                                        | Relaxation of artery                             | 7.99E-03 | 3 | M-3 |
| Cell-To-Cell Signaling and Interaction, Cellular Movement, Immune Cell Trafficking                                                                                                                                                                                                                                       | Attraction of phagocytes                         | 7.99E-03 | 3 | M-3 |
| Cell Cycle, Connective Tissue Development and Function                                                                                                                                                                                                                                                                   | S phase of fibroblast cell lines                 | 9.30E-03 | 3 | M-3 |
| Cell Cycle, Embryonic Development                                                                                                                                                                                                                                                                                        | Senescence of embryonic cell lines               | 1.23E-02 | 3 | M-3 |
| Cell Morphology, Cellular Assembly and Organization                                                                                                                                                                                                                                                                      | Morphology of filaments                          | 1.51E-02 | 3 | M-3 |
| Cellular Assembly and Organization, Cellular Compromise                                                                                                                                                                                                                                                                  | Disruption of filaments                          | 2.68E-03 | 3 | M-3 |
| Cellular Assembly and Organization                                                                                                                                                                                                                                                                                       | Generation of filaments                          | 1.58E-03 | 3 | M-3 |
| Organ Morphology, Reproductive System Development and Function, Tissue Development                                                                                                                                                                                                                                       | Branching of mammary gland                       | 3.37E-03 | 3 | M-3 |
| Cardiovascular System Development and Function, Cellular Movement                                                                                                                                                                                                                                                        | Chemotaxis of vascular endothelial cells         | 9.19E-04 | 3 | M-3 |
| Carbohydrate Metabolism                                                                                                                                                                                                                                                                                                  | Depletion of polysaccharide                      | 4.00E-04 | 3 | M-3 |
| Connective Tissue Development and Function, Skeletal and Muscular System Development and Function                                                                                                                                                                                                                        | Association of rib                               | 4.41E-03 | 2 | M-1 |
| Cellular Movement, Nervous System Development and Function                                                                                                                                                                                                                                                               | Guidance of corticospinal axon                   | 4.41E-03 | 2 | M-1 |
| Cell Cycle                                                                                                                                                                                                                                                                                                               | Arrest in G2 phase of skin cancer cell lines     | 4.41E-03 | 2 | M-1 |
| Cell-mediated Immune Response, Cellular Development, Cellular Function and Maintenance, Cellular Growth and Proliferation, Embryonic Development, Hematological System Development and Function, Hematopoiesis, Lymphoid Tissue Structure and Development, Organ Development, Organismal Development, Tissue Development | Metabolism by thymocytes                         | 4.41E-03 | 2 | M-1 |
| Cellular Development, Cellular Function and Maintenance, Cellular Growth and Proliferation                                                                                                                                                                                                                               | Assembly of mural cells                          | 4.41E-03 | 2 | M-1 |
| Cellular Assembly and Organization                                                                                                                                                                                                                                                                                       | Quantity of tubulovesicular structures           | 4.41E-03 | 2 | M-1 |
| Cardiovascular System Development and Function, Organismal Development                                                                                                                                                                                                                                                   | Sprouting angiogenesis by endothelial cell lines | 4.41E-03 | 2 | M-1 |
| Embryonic Development, Organismal Development, Tissue Development                                                                                                                                                                                                                                                        | Development of axial mesendoderm                 | 4.41E-03 | 2 | M-1 |

|                                                                                                                                                                                         |                                                                         |          |   |     |
|-----------------------------------------------------------------------------------------------------------------------------------------------------------------------------------------|-------------------------------------------------------------------------|----------|---|-----|
| Organismal Development                                                                                                                                                                  | Aging of brain                                                          | 4.41E-03 | 2 | M-1 |
| Cellular Movement, Nervous System Development and Function                                                                                                                              | Guidance of corticothalamic axons                                       | 4.41E-03 | 2 | M-1 |
| Cellular Assembly and Organization, Cellular Function and Maintenance                                                                                                                   | Remodeling of basement membrane                                         | 4.41E-03 | 2 | M-1 |
| Drug Metabolism, Endocrine System Development and Function, Lipid Metabolism, Small Molecule Biochemistry                                                                               | Binding of hydrocortisone                                               | 4.41E-03 | 2 | M-1 |
| Hair and Skin Development and Function                                                                                                                                                  | Pigmentation of retinal pigment epithelium                              | 4.41E-03 | 2 | M-1 |
| Carbohydrate Metabolism, Lipid Metabolism, Molecular Transport, Small Molecule Biochemistry                                                                                             | Accumulation of phosphatidylinositol-3-phosphate                        | 4.41E-03 | 2 | M-1 |
| Cellular Movement, Nervous System Development and Function                                                                                                                              | Migration of neocortical neurons                                        | 4.41E-03 | 2 | M-1 |
| Cellular Development, Cellular Growth and Proliferation, Hematological System Development and Function, Lymphoid Tissue Structure and Development                                       | Clonal expansion of mononuclear phagocyte progenitors                   | 4.41E-03 | 2 | M-1 |
| Embryonic Development, Nervous System Development and Function, Organ Development, Organ Morphology, Organismal Development, Tissue Development, Visual System Development and Function | Morphogenesis of ciliary body                                           | 4.41E-03 | 2 | M-1 |
| Nervous System Development and Function                                                                                                                                                 | Pathfinding of olfactory receptor neurons                               | 4.41E-03 | 2 | M-1 |
| Nervous System Development and Function                                                                                                                                                 | Shrinkage of cerebral cortex                                            | 4.41E-03 | 2 | M-1 |
| Cell Morphology, Nervous System Development and Function                                                                                                                                | Projection of olfactory receptor neurons                                | 4.41E-03 | 2 | M-1 |
| Cell Cycle                                                                                                                                                                              | Arrest in cell cycle progression of mesothelioma cell lines             | 4.41E-03 | 2 | M-1 |
| Digestive System Development and Function, Embryonic Development, Organismal Development                                                                                                | Development of secondary palate                                         | 4.41E-03 | 2 | M-1 |
| Carbohydrate Metabolism, Lipid Metabolism, Small Molecule Biochemistry                                                                                                                  | Conversion of choline-phospholipid                                      | 4.41E-03 | 2 | M-1 |
| Embryonic Development, Organismal Development, Tissue Development                                                                                                                       | Development of extraembryonic ectoderm                                  | 4.41E-03 | 2 | M-1 |
| Cellular Movement, Hair and Skin Development and Function                                                                                                                               | Transmigration of epithelial cell lines                                 | 4.41E-03 | 2 | M-1 |
| Cellular Assembly and Organization                                                                                                                                                      | Binding of membrane rafts                                               | 4.41E-03 | 2 | M-1 |
| Connective Tissue Development and Function, Skeletal and Muscular System Development and Function                                                                                       | Association of C6 vertebra                                              | 4.41E-03 | 2 | M-1 |
| Embryonic Development                                                                                                                                                                   | Shrinkage of tail bud                                                   | 4.41E-03 | 2 | M-1 |
| Cellular Assembly and Organization                                                                                                                                                      | Fusion of insulin granule                                               | 4.41E-03 | 2 | M-1 |
| Cardiovascular System Development and Function, Tissue Morphology                                                                                                                       | Morphology of aortic root                                               | 4.41E-03 | 2 | M-1 |
| Cellular Movement, Nervous System Development and Function                                                                                                                              | Guidance of corticocortical axons                                       | 4.41E-03 | 2 | M-1 |
| Cellular Movement, Nervous System Development and Function                                                                                                                              | Guidance of corticofugal fibers                                         | 4.41E-03 | 2 | M-1 |
| Cell Death and Survival                                                                                                                                                                 | Delay in recovery of cells                                              | 4.41E-03 | 2 | M-1 |
| Cell Death and Survival                                                                                                                                                                 | Survival of mononuclear phagocyte progenitors                           | 4.41E-03 | 2 | M-1 |
| Cell-To-Cell Signaling and Interaction, Nervous System Development and Function                                                                                                         | Long term depression of striatopallidal neurons                         | 4.41E-03 | 2 | M-1 |
| Cell-To-Cell Signaling and Interaction                                                                                                                                                  | Gap junctional intercellular communication of neuronal progenitor cells | 4.41E-03 | 2 | M-1 |
| Cell-To-Cell Signaling and Interaction                                                                                                                                                  | Signaling of vascular smooth muscle cells                               | 4.41E-03 | 2 | M-1 |
| Cellular Assembly and Organization, Cellular Function and Maintenance                                                                                                                   | Penetration of microtubules                                             | 4.41E-03 | 2 | M-1 |
| Cell Death and Survival                                                                                                                                                                 | Mitochondrial cell death of squamous cell carcinoma cell lines          | 4.41E-03 | 2 | M-1 |
| Cellular Development                                                                                                                                                                    | Transition of progenitor cells                                          | 4.41E-03 | 2 | M-1 |
| Cellular Development, Digestive System Development and Function, Organismal Development                                                                                                 | Differentiation of bile duct                                            | 4.41E-03 | 2 | M-1 |
| Cell Death and Survival, Connective Tissue Development and Function                                                                                                                     | Survival of bone marrow stromal cells                                   | 4.41E-03 | 2 | M-1 |

|                                                                                                                                                                                                           |                                                   |          |   |     |
|-----------------------------------------------------------------------------------------------------------------------------------------------------------------------------------------------------------|---------------------------------------------------|----------|---|-----|
| Cell Death and Survival                                                                                                                                                                                   | Anoikis of adenocarcinoma cell lines              | 6.44E-04 | 2 | M-2 |
| Cellular Movement, Connective Tissue Development and Function                                                                                                                                             | Mobility of fibroblast cell lines                 | 1.63E-02 | 2 | M-2 |
| Cellular Assembly and Organization                                                                                                                                                                        | Trafficking of secretory vesicles                 | 3.74E-03 | 2 | M-2 |
| Cell Morphology                                                                                                                                                                                           | Polarization of decidual macrophages              | 9.03E-03 | 2 | M-2 |
| Lipid Metabolism, Small Molecule Biochemistry                                                                                                                                                             | Acylation of phospholipid                         | 3.74E-03 | 2 | M-2 |
| Cell Morphology, Cellular Movement, Nervous System Development and Function                                                                                                                               | Innervation of axons                              | 1.63E-02 | 2 | M-2 |
| Cellular Assembly and Organization                                                                                                                                                                        | Formation of late endosomes                       | 6.12E-03 | 2 | M-2 |
| Cellular Function and Maintenance                                                                                                                                                                         | Respiration of connective tissue cells            | 2.06E-02 | 2 | M-2 |
| Cardiovascular System Development and Function, Cellular Development, Cellular Function and Maintenance, Cellular Growth and Proliferation, Organismal Development, Tissue Development, Tissue Morphology | Expansion of endothelial cells                    | 1.24E-02 | 2 | M-2 |
| Cellular Growth and Proliferation, Hematological System Development and Function                                                                                                                          | Inhibition of Th1 cells                           | 3.74E-03 | 2 | M-2 |
| Behavior                                                                                                                                                                                                  | Immobility behavior                               | 1.90E-03 | 2 | M-2 |
| Cellular Function and Maintenance, Molecular Transport, Small Molecule Biochemistry                                                                                                                       | Exocytosis of histamine                           | 2.06E-02 | 2 | M-2 |
| Cell Death and Survival, Hematological System Development and Function                                                                                                                                    | Survival of invariant natural killer T cells      | 3.74E-03 | 2 | M-2 |
| Cellular Assembly and Organization, Cellular Function and Maintenance                                                                                                                                     | Assembly of stress granule                        | 9.03E-03 | 2 | M-2 |
| DNA Replication, Recombination, and Repair, Nucleic Acid Metabolism, Small Molecule Biochemistry                                                                                                          | Metabolism of adenosine                           | 1.63E-02 | 2 | M-2 |
| Lipid Metabolism, Molecular Transport, Small Molecule Biochemistry                                                                                                                                        | Localization of cholesterol                       | 9.03E-03 | 2 | M-2 |
| Cell-To-Cell Signaling and Interaction, Cellular Growth and Proliferation, Hematological System Development and Function                                                                                  | Induction of Th2 cells                            | 1.24E-02 | 2 | M-2 |
| Cellular Development, Hematological System Development and Function                                                                                                                                       | Inactivation of macrophages                       | 1.90E-03 | 2 | M-2 |
| Endocrine System Development and Function                                                                                                                                                                 | Regulation of hypothalamic pituitary thyroid axis | 1.90E-03 | 2 | M-2 |
| Cell Cycle, Hematological System Development and Function                                                                                                                                                 | Mitogenesis of T lymphocytes                      | 2.06E-02 | 2 | M-2 |
| Cell-To-Cell Signaling and Interaction, Cellular Growth and Proliferation, Hematological System Development and Function                                                                                  | Suppression of helper T lymphocytes               | 1.24E-02 | 2 | M-2 |
| Cell-mediated Immune Response, Lymphoid Tissue Structure and Development                                                                                                                                  | Frequency of Th1 cells                            | 3.74E-03 | 2 | M-2 |
| Amino Acid Metabolism, Small Molecule Biochemistry                                                                                                                                                        | Translocation of L-amino acid                     | 2.06E-02 | 2 | M-2 |
| Behavior                                                                                                                                                                                                  | Writhing                                          | 3.74E-03 | 2 | M-2 |
| Energy Production, Lipid Metabolism, Small Molecule Biochemistry                                                                                                                                          | Beta-oxidation of very long chain fatty acid      | 6.12E-03 | 2 | M-2 |
| Cell Morphology, Cellular Function and Maintenance                                                                                                                                                        | Autophagy of pancreatic cancer cell lines         | 1.24E-02 | 2 | M-2 |
| Digestive System Development and Function, Organ Morphology, Organismal Development                                                                                                                       | Length of colon                                   | 1.63E-02 | 2 | M-2 |
| Cell-mediated Immune Response, Hematopoiesis, Lymphoid Tissue Structure and Development                                                                                                                   | Frequency of pre-T lymphocytes                    | 9.03E-03 | 2 | M-2 |
| Cellular Development, Cellular Growth and Proliferation, Hematological System Development and Function, Hematopoiesis, Lymphoid Tissue Structure and Development, Tissue Development                      | Differentiation of M2c macrophages                | 3.74E-03 | 2 | M-2 |
| Cellular Development, Cellular Growth and Proliferation, Embryonic Development, Hematopoiesis, Lymphoid Tissue Structure and Development, Organ Development, Organismal Development, Tissue Development   | Development of type 3 innate lymphoid cells       | 3.74E-03 | 2 | M-2 |
| Cellular Movement, Hematological System Development and Function, Humoral Immune Response, Immune Cell Trafficking                                                                                        | Distribution of B lymphocytes                     | 1.90E-03 | 2 | M-2 |
| Cell Death and Survival                                                                                                                                                                                   | Apoptosis of BMMC cells                           | 2.06E-02 | 2 | M-2 |
| Cellular Function and Maintenance, Connective Tissue Development and Function, Skeletal and Muscular System Development and Function                                                                      | Regulation of osteoblasts                         | 1.63E-02 | 2 | M-2 |

|                                                                                                                                                                                                                                                                                                                          |                                                  |          |   |     |
|--------------------------------------------------------------------------------------------------------------------------------------------------------------------------------------------------------------------------------------------------------------------------------------------------------------------------|--------------------------------------------------|----------|---|-----|
| Cell Morphology                                                                                                                                                                                                                                                                                                          | Elongation of breast cancer cell lines           | 3.74E-03 | 2 | M-2 |
| Carbohydrate Metabolism, Lipid Metabolism, Molecular Transport, Small Molecule Biochemistry                                                                                                                                                                                                                              | Quantity of phosphatidylinositol 3,5-diphosphate | 1.24E-02 | 2 | M-2 |
| Cellular Assembly and Organization                                                                                                                                                                                                                                                                                       | Activation of lamellipodia                       | 6.12E-03 | 2 | M-2 |
| Cellular Assembly and Organization, Nervous System Development and Function, Tissue Morphology                                                                                                                                                                                                                           | Density of synaptic vesicles                     | 9.03E-03 | 2 | M-2 |
| Digestive System Development and Function                                                                                                                                                                                                                                                                                | Formation of palate                              | 9.03E-03 | 2 | M-2 |
| Cell-To-Cell Signaling and Interaction, Hematological System Development and Function                                                                                                                                                                                                                                    | Priming of leukocyte cell lines                  | 6.44E-04 | 2 | M-2 |
| Cell-To-Cell Signaling and Interaction, Connective Tissue Development and Function                                                                                                                                                                                                                                       | Adhesion of synovial fibroblasts                 | 9.03E-03 | 2 | M-2 |
| Organ Morphology, Reproductive System Development and Function                                                                                                                                                                                                                                                           | Quantity of atretic ovarian follicle             | 6.12E-03 | 2 | M-2 |
| Cellular Development, Cellular Growth and Proliferation, Hematological System Development and Function, Lymphoid Tissue Structure and Development                                                                                                                                                                        | Proliferation of induced regulatory T-lymphocyte | 1.63E-02 | 2 | M-2 |
| Carbohydrate Metabolism, Drug Metabolism, Molecular Transport, Small Molecule Biochemistry                                                                                                                                                                                                                               | Accumulation of doxorubicin                      | 2.06E-02 | 2 | M-2 |
| Molecular Transport                                                                                                                                                                                                                                                                                                      | Excretion of chloride                            | 6.12E-03 | 2 | M-2 |
| Cellular Development, Cellular Growth and Proliferation, Hematological System Development and Function, Lymphoid Tissue Structure and Development                                                                                                                                                                        | Arrest in proliferation of leukocytes            | 2.53E-02 | 2 | M-2 |
| Cardiovascular System Development and Function, Tissue Development                                                                                                                                                                                                                                                       | Activation of vascular endothelial tissue        | 2.06E-02 | 2 | M-2 |
| Cell Morphology, Organ Morphology, Skeletal and Muscular System Development and Function, Tissue Morphology                                                                                                                                                                                                              | Morphology of sarcomere                          | 2.06E-02 | 2 | M-2 |
| Cellular Development, Cellular Growth and Proliferation, Organ Development, Reproductive System Development and Function, Tissue Development, Tissue Morphology                                                                                                                                                          | Expansion of cumulus cells                       | 2.06E-02 | 2 | M-2 |
| Lipid Metabolism, Small Molecule Biochemistry                                                                                                                                                                                                                                                                            | Transmission of cholesterol                      | 1.63E-02 | 2 | M-2 |
| Cell Death and Survival                                                                                                                                                                                                                                                                                                  | Survival of plasmacytoid dendritic cells         | 6.12E-03 | 2 | M-2 |
| Cellular Development, Cellular Growth and Proliferation, Hematological System Development and Function, Hematopoiesis, Lymphoid Tissue Structure and Development, Tissue Development                                                                                                                                     | Differentiation of macrophage-like cells         | 6.12E-03 | 2 | M-2 |
| Cellular Assembly and Organization                                                                                                                                                                                                                                                                                       | Fusion of transport vesicles                     | 1.90E-03 | 2 | M-2 |
| Cellular Development, Cellular Growth and Proliferation, Embryonic Development, Hematological System Development and Function, Hematopoiesis, Humoral Immune Response, Lymphoid Tissue Structure and Development, Organ Development, Organismal Development, Tissue Development                                          | Differentiation of naive B cells                 | 1.63E-02 | 2 | M-2 |
| Cellular Development, Cellular Growth and Proliferation                                                                                                                                                                                                                                                                  | Outgrowth of breast cancer cell lines            | 2.06E-02 | 2 | M-2 |
| Cell-To-Cell Signaling and Interaction                                                                                                                                                                                                                                                                                   | Response of bronchial epithelial cells           | 6.44E-04 | 2 | M-2 |
| Cell-mediated Immune Response, Cellular Development, Cellular Function and Maintenance, Cellular Growth and Proliferation, Embryonic Development, Hematological System Development and Function, Hematopoiesis, Lymphoid Tissue Structure and Development, Organ Development, Organismal Development, Tissue Development | Development of memory natural killer cells       | 6.44E-04 | 2 | M-2 |
| Cellular Development                                                                                                                                                                                                                                                                                                     | Onset of differentiation of cells                | 1.63E-02 | 2 | M-2 |
| Cellular Compromise                                                                                                                                                                                                                                                                                                      | Injury of kidney cell lines                      | 3.74E-03 | 2 | M-2 |
| Lipid Metabolism, Molecular Transport, Small Molecule Biochemistry                                                                                                                                                                                                                                                       | Accumulation of lactosylceramide                 | 9.03E-03 | 2 | M-2 |
| Cell-To-Cell Signaling and Interaction, Cellular Growth and Proliferation, Connective Tissue Development and Function                                                                                                                                                                                                    | Stimulation of synovial fibroblasts              | 1.24E-02 | 2 | M-2 |
| Energy Production, Lipid Metabolism, Small Molecule Biochemistry                                                                                                                                                                                                                                                         | Beta-oxidation of lignoceric acid                | 9.03E-03 | 2 | M-2 |
| Cell Cycle, Hair and Skin Development and Function                                                                                                                                                                                                                                                                       | G1/S phase transition of epidermal cells         | 9.03E-03 | 2 | M-2 |
| Cardiovascular System Development and Function, Embryonic Development, Organismal Development                                                                                                                                                                                                                            | Development of aortic arch                       | 9.03E-03 | 2 | M-2 |
| Embryonic Development, Organismal Development, Tissue Morphology                                                                                                                                                                                                                                                         | Thickness of embryonic tissue                    | 2.06E-02 | 2 | M-2 |

|                                                                                                                                                                                                                                      |                                                              |          |   |     |
|--------------------------------------------------------------------------------------------------------------------------------------------------------------------------------------------------------------------------------------|--------------------------------------------------------------|----------|---|-----|
| Cell Death and Survival                                                                                                                                                                                                              | Killing of Leishmania major                                  | 2.06E-02 | 2 | M-2 |
| Cell-To-Cell Signaling and Interaction, Cellular Assembly and Organization, Tissue Development                                                                                                                                       | Deposition of fibronectin matrix                             | 3.74E-03 | 2 | M-2 |
| Lipid Metabolism, Molecular Transport, Small Molecule Biochemistry                                                                                                                                                                   | Accumulation of ganglioside GM3                              | 9.03E-03 | 2 | M-2 |
| Cell-To-Cell Signaling and Interaction, Cellular Growth and Proliferation, Hematological System Development and Function                                                                                                             | Suppression of bone marrow-derived dendritic cells           | 6.44E-04 | 2 | M-2 |
| Molecular Transport, Nucleic Acid Metabolism, Small Molecule Biochemistry, Vitamin and Mineral Metabolism                                                                                                                            | Transport of thiamine                                        | 1.90E-03 | 2 | M-2 |
| Molecular Transport, Nucleic Acid Metabolism, Small Molecule Biochemistry, Vitamin and Mineral Metabolism                                                                                                                            | Uptake of thiamine                                           | 1.90E-03 | 2 | M-2 |
| Cellular Development, Cellular Growth and Proliferation, Tissue Development                                                                                                                                                          | Proliferation of bronchial epithelial cells                  | 1.24E-02 | 2 | M-2 |
| Lipid Metabolism, Molecular Transport, Small Molecule Biochemistry                                                                                                                                                                   | Concentration of eicosapentenoic acid                        | 9.03E-03 | 2 | M-2 |
| Lipid Metabolism, Molecular Transport, Small Molecule Biochemistry                                                                                                                                                                   | Localization of fatty acid                                   | 3.74E-03 | 2 | M-2 |
| Cell Cycle, Hair and Skin Development and Function                                                                                                                                                                                   | G1 phase of keratinocytes                                    | 1.63E-02 | 2 | M-2 |
| Cell-To-Cell Signaling and Interaction                                                                                                                                                                                               | Response of lung cancer cell lines                           | 2.06E-02 | 2 | M-2 |
| Cell-To-Cell Signaling and Interaction, Cellular Growth and Proliferation, Hematological System Development and Function                                                                                                             | Induction of PBMCs                                           | 3.74E-03 | 2 | M-2 |
| Cell-To-Cell Signaling and Interaction, Cellular Growth and Proliferation, Hematological System Development and Function                                                                                                             | Induction of naive T lymphocytes                             | 6.12E-03 | 2 | M-2 |
| DNA Replication, Recombination, and Repair, Gene Expression                                                                                                                                                                          | Demethylation of DNA                                         | 2.06E-02 | 2 | M-2 |
| Amino Acid Metabolism, Small Molecule Biochemistry                                                                                                                                                                                   | Translocation of glutamine family amino acid                 | 2.06E-02 | 2 | M-2 |
| Cell-To-Cell Signaling and Interaction, Nervous System Development and Function                                                                                                                                                      | Firing of Purkinje cells                                     | 3.74E-03 | 2 | M-2 |
| Embryonic Development, Hair and Skin Development and Function, Organ Development, Organismal Development, Tissue Development                                                                                                         | Re-epithelialization of skin                                 | 9.03E-03 | 2 | M-2 |
| Carbohydrate Metabolism, Lipid Metabolism, Small Molecule Biochemistry                                                                                                                                                               | Dephosphorylation of phosphatidylinositol-3,4,5-triphosphate | 9.03E-03 | 2 | M-2 |
| Lipid Metabolism, Molecular Transport, Nucleic Acid Metabolism, Small Molecule Biochemistry                                                                                                                                          | Transport of acyl-coenzyme A                                 | 3.74E-03 | 2 | M-2 |
| Cell Morphology                                                                                                                                                                                                                      | Polarization of macrophage cancer cell lines                 | 2.06E-02 | 2 | M-2 |
| Lipid Metabolism, Molecular Transport, Small Molecule Biochemistry                                                                                                                                                                   | Accumulation of glucosylceramide                             | 1.24E-02 | 2 | M-2 |
| Protein Trafficking                                                                                                                                                                                                                  | Sorting of protein                                           | 1.24E-02 | 2 | M-2 |
| Cell Death and Survival                                                                                                                                                                                                              | Anoikis of prostate cancer cell lines                        | 9.03E-03 | 2 | M-2 |
| Cell-mediated Immune Response, Cellular Movement, Hematological System Development and Function, Immune Cell Trafficking                                                                                                             | Distribution of T lymphocytes                                | 3.74E-03 | 2 | M-2 |
| Cellular Assembly and Organization, Skeletal and Muscular System Development and Function, Tissue Development                                                                                                                        | Formation of myosin stress fibers                            | 6.12E-03 | 2 | M-2 |
| Protein Trafficking                                                                                                                                                                                                                  | Recruitment of protein                                       | 9.03E-03 | 2 | M-2 |
| Cell Cycle, Cell-To-Cell Signaling and Interaction, Cellular Growth and Proliferation                                                                                                                                                | Contact growth inhibition of kidney cancer cell lines        | 3.74E-03 | 2 | M-2 |
| Cellular Development, Cellular Growth and Proliferation, Hematological System Development and Function, Hematopoiesis, Lymphoid Tissue Structure and Development, Tissue Development                                                 | Generation of monocyte-derived dendritic cells               | 1.90E-03 | 2 | M-2 |
| Connective Tissue Development and Function, Tissue Development                                                                                                                                                                       | Accumulation of visceral fat                                 | 1.90E-03 | 2 | M-2 |
| Cellular Development, Cellular Growth and Proliferation, Hematological System Development and Function, Humoral Immune Response, Lymphoid Tissue Structure and Development                                                           | Proliferation of memory B cells                              | 1.24E-02 | 2 | M-2 |
| Tissue Morphology                                                                                                                                                                                                                    | Quantity of Staphylococcus aureus                            | 3.74E-03 | 2 | M-2 |
| Cell Morphology, Cellular Assembly and Organization, Cellular Development, Cellular Function and Maintenance, Cellular Growth and Proliferation, Nervous System Development and Function, Organismal Development, Tissue Development | Sprouting of sensory neurons                                 | 3.74E-03 | 2 | M-2 |

|                                                                                                                                                                                                                                                                                                                          |                                                          |          |   |     |
|--------------------------------------------------------------------------------------------------------------------------------------------------------------------------------------------------------------------------------------------------------------------------------------------------------------------------|----------------------------------------------------------|----------|---|-----|
| Cell-mediated Immune Response, Cellular Development, Cellular Function and Maintenance, Cellular Growth and Proliferation, Embryonic Development, Hematological System Development and Function, Hematopoiesis, Lymphoid Tissue Structure and Development, Organ Development, Organismal Development, Tissue Development | Differentiation of effector cytotoxic T lymphocytes      | 1.63E-02 | 2 | M-2 |
| Cell-mediated Immune Response, Cellular Development, Cellular Function and Maintenance, Cellular Growth and Proliferation, Embryonic Development, Hematological System Development and Function, Hematopoiesis, Lymphoid Tissue Structure and Development, Organ Development, Organismal Development, Tissue Development | Generation of Tr1 cells                                  | 9.03E-03 | 2 | M-2 |
| Cellular Movement, Hair and Skin Development and Function                                                                                                                                                                                                                                                                | Chemotaxis of skin cell lines                            | 3.12E-03 | 2 | M-3 |
| Cellular Compromise                                                                                                                                                                                                                                                                                                      | Damage of filaments                                      | 5.08E-03 | 2 | M-3 |
| Cellular Function and Maintenance, Hematological System Development and Function                                                                                                                                                                                                                                         | Function of neutrophils                                  | 5.83E-03 | 2 | M-3 |
| Cell Cycle, Connective Tissue Development and Function                                                                                                                                                                                                                                                                   | G2/M phase transition of fibroblast cell lines           | 1.61E-03 | 2 | M-3 |
| Cell Cycle                                                                                                                                                                                                                                                                                                               | Delay in mitosis of cervical cancer cell lines           | 1.46E-02 | 2 | M-3 |
| Behavior                                                                                                                                                                                                                                                                                                                 | Fear conditioning                                        | 5.08E-03 | 2 | M-3 |
| Embryonic Development, Nervous System Development and Function, Tissue Development                                                                                                                                                                                                                                       | Accumulation of neuroblasts                              | 1.77E-04 | 2 | M-3 |
| Cellular Assembly and Organization                                                                                                                                                                                                                                                                                       | Generation of actin filaments                            | 6.63E-03 | 2 | M-3 |
| Cellular Movement, Hematological System Development and Function, Immune Cell Trafficking                                                                                                                                                                                                                                | Arrest in cell rolling of leukocytes                     | 7.47E-03 | 2 | M-3 |
| Embryonic Development, Nervous System Development and Function, Organ Development, Organismal Development, Tissue Development                                                                                                                                                                                            | Development of internal granular layer of olfactory bulb | 3.52E-04 | 2 | M-3 |
| Organ Morphology, Organismal Development, Reproductive System Development and Function                                                                                                                                                                                                                                   | Size of ovary                                            | 8.36E-03 | 2 | M-3 |
| Behavior                                                                                                                                                                                                                                                                                                                 | Vocalization                                             | 4.37E-03 | 2 | M-3 |
| Organ Morphology, Organismal Development, Reproductive System Development and Function                                                                                                                                                                                                                                   | Enlargement of prostate gland                            | 5.84E-04 | 2 | M-3 |
| Cellular Development, Nervous System Development and Function, Tissue Development                                                                                                                                                                                                                                        | Maturation of dendritic spines                           | 4.37E-03 | 2 | M-3 |
| Cell-To-Cell Signaling and Interaction                                                                                                                                                                                                                                                                                   | Adhesion of sarcoma cell lines                           | 1.46E-02 | 2 | M-3 |
| Cellular Movement                                                                                                                                                                                                                                                                                                        | Arrest in cell movement of myeloid cells                 | 4.37E-03 | 2 | M-3 |
| Cell-To-Cell Signaling and Interaction, Nervous System Development and Function                                                                                                                                                                                                                                          | Neurotransmission of intercellular junctions             | 1.46E-02 | 2 | M-3 |
| Cardiovascular System Development and Function, Tissue Morphology                                                                                                                                                                                                                                                        | Relaxation of mesenteric artery                          | 3.72E-03 | 2 | M-3 |
| Hair and Skin Development and Function, Organ Morphology                                                                                                                                                                                                                                                                 | Quantity of hair follicle                                | 2.06E-03 | 2 | M-3 |
| Cardiovascular System Development and Function, Cell-To-Cell Signaling and Interaction, Cellular Assembly and Organization                                                                                                                                                                                               | Cell-cell adhesion of vascular endothelial cells         | 7.47E-03 | 2 | M-3 |
| Nervous System Development and Function                                                                                                                                                                                                                                                                                  | Remyelination                                            | 1.46E-02 | 2 | M-3 |
| Cellular Movement, Hematological System Development and Function, Immune Cell Trafficking                                                                                                                                                                                                                                | Cell rolling of mononuclear leukocytes                   | 1.13E-02 | 2 | M-3 |
| Endocrine System Development and Function, Lipid Metabolism, Small Molecule Biochemistry, Vitamin and Mineral Metabolism                                                                                                                                                                                                 | Synthesis of pregnenolone                                | 1.03E-02 | 2 | M-3 |
| Embryonic Development, Organismal Development, Tissue Morphology                                                                                                                                                                                                                                                         | Fusion of chorion                                        | 3.72E-03 | 2 | M-3 |
| Small Molecule Biochemistry                                                                                                                                                                                                                                                                                              | Synthesis of catecholamine                               | 1.46E-02 | 2 | M-3 |
| Cardiovascular System Development and Function, Cellular Movement                                                                                                                                                                                                                                                        | Chemotaxis of endothelial cell lines                     | 1.03E-02 | 2 | M-3 |
| Cell Morphology                                                                                                                                                                                                                                                                                                          | Length of plasma membrane projections                    | 5.83E-03 | 2 | M-3 |
| Embryonic Development, Organismal Development, Tissue Development                                                                                                                                                                                                                                                        | Development of ependymal layer                           | 1.77E-04 | 2 | M-3 |
| Tissue Development                                                                                                                                                                                                                                                                                                       | Formation of lumen                                       | 6.63E-03 | 2 | M-3 |



|                                                                                                                                                                                |                                                     |          |   |     |
|--------------------------------------------------------------------------------------------------------------------------------------------------------------------------------|-----------------------------------------------------|----------|---|-----|
| Cellular Development, Cellular Growth and Proliferation, Nervous System Development and Function, Organ Development, Tissue Development                                        | Outgrowth of dorsal root ganglion cells             | 3.52E-04 | 2 | M-3 |
| Cellular Movement, Nervous System Development and Function                                                                                                                     | Migration of oligodendrocyte precursor cells        | 4.37E-03 | 2 | M-3 |
| Embryonic Development, Organismal Development, Tissue Morphology                                                                                                               | Fusion of allantois                                 | 3.72E-03 | 2 | M-3 |
| Embryonic Development, Tissue Development                                                                                                                                      | Proliferation of embryonic tissue                   | 7.47E-03 | 2 | M-3 |
| Embryonic Development, Organismal Development, Tissue Development                                                                                                              | Formation of rostral migratory stream               | 3.52E-04 | 2 | M-3 |
| Cell Cycle                                                                                                                                                                     | Metaphase of tumor cell lines                       | 1.61E-03 | 2 | M-3 |
| Cell Cycle                                                                                                                                                                     | Delay in cell cycle progression of tumor cell lines | 1.13E-02 | 2 | M-3 |
| Cell-To-Cell Signaling and Interaction, Cellular Movement                                                                                                                      | Recruitment of leukemia cell lines                  | 5.84E-04 | 2 | M-3 |
| Behavior                                                                                                                                                                       | Nest building behavior                              | 3.52E-04 | 2 | M-3 |
| Cellular Development                                                                                                                                                           | Differentiation of pulmonary alveolus               | 8.36E-03 | 2 | M-3 |
| Cell Cycle, Gene Expression                                                                                                                                                    | Binding of p53 consensus binding site               | 1.03E-02 | 2 | M-3 |
| Cell Morphology, Organ Morphology, Skeletal and Muscular System Development and Function, Tissue Morphology                                                                    | Morphology of smooth muscle cells                   | 7.47E-03 | 2 | M-3 |
| Carbohydrate Metabolism, Lipid Metabolism, Molecular Transport, Small Molecule Biochemistry                                                                                    | Concentration of phosphatidic acid                  | 2.04E-02 | 2 | M-5 |
| Lipid Metabolism, Molecular Transport, Small Molecule Biochemistry                                                                                                             | Accumulation of triacylglycerol                     | 7.79E-03 | 2 | M-5 |
| Cell Death and Survival                                                                                                                                                        | Cytolysis                                           | 2.93E-02 | 2 | M-5 |
| Cell Death and Survival                                                                                                                                                        | Quantity of apoptotic cells                         | 6.38E-03 | 2 | M-5 |
| Cellular Development, Hematological System Development and Function, Lymphoid Tissue Structure and Development                                                                 | Maturation of leukocytes                            | 4.33E-02 | 2 | M-5 |
| Cell Death and Survival                                                                                                                                                        | Cell death of rhabdomyosarcoma cell lines           | 5.79E-04 | 2 | M-5 |
| Cell-To-Cell Signaling and Interaction, Nervous System Development and Function                                                                                                | Long-term potentiation                              | 3.01E-02 | 2 | M-5 |
| Molecular Transport, Protein Trafficking                                                                                                                                       | Secretion of protein                                | 1.67E-03 | 2 | M-5 |
| Cell Death and Survival                                                                                                                                                        | Killing of cells                                    | 4.03E-02 | 2 | M-5 |
| Cell Death and Survival, Cellular Compromise                                                                                                                                   | Cytotoxicity of cells                               | 3.48E-02 | 2 | M-5 |
| Cellular Development, Cellular Growth and Proliferation, Hematological System Development and Function, Lymphoid Tissue Structure and Development                              | Expansion of mononuclear leukocytes                 | 2.74E-02 | 2 | M-5 |
| Embryonic Development, Hematological System Development and Function, Lymphoid Tissue Structure and Development, Organ Development, Organismal Development, Tissue Development | Formation of lymphoid organ                         | 2.65E-02 | 2 | M-5 |
| Behavior                                                                                                                                                                       | Motor learning                                      | 5.42E-04 | 2 | M-4 |
| Carbohydrate Metabolism                                                                                                                                                        | Binding of polysaccharide                           | 5.60E-03 | 2 | M-4 |

a) The p-value: statistical overlap of differentially expressed gene list and gene set

b) Z-score:  $z > 1.96$  to be significantly activated or increased, and those with  $z < -1.96$  to be significantly inhibited
