# Supplementary material
Source: PubMed Central journal article supplement (PMC6417155)
Supplement: gaz001_schall_et_al._table_s10.pdf [file gaz001_schall_et_al._table_s10.pdf]

Table S10 - IPA canonical pathways unique to EGA1 super-group

| Canonical Pathways              | p-value <sup>a</sup> | Z-score <sup>b</sup> | Activation State | Total DEGs | Sub-Group |
|---------------------------------|----------------------|----------------------|------------------|------------|-----------|
| Wnt/ $\beta$ -catenin Signaling | 7.76E-03             | 1.342                |                  | 5          | EGA1-1    |
| Estrogen-mediated S-phase Entry | 8.13E-04             |                      |                  | 3          | EGA1-1    |

a) The p-value: statistical overlap of differentially expressed gene list and gene set

b) Z-score:  $z > 1.96$  to be significantly activated or increased, and those with  $z < -1.96$  to be significantly inhibited
