# Supplementary material
Source: PubMed Central journal article supplement (PMC6417155)
Supplement: gaz001_schall_et_al._table_s11.pdf [file gaz001_schall_et_al._table_s11.pdf]

Table S11 - IPA biological functions unique to EGA1 super-group

| Categories                                                                                                                                                                                                                                                                      | Functions Annotation                                       | p-value <sup>a</sup> | Z-score <sup>b</sup> | Activation State | Total DEGs | Sub-Group |
|---------------------------------------------------------------------------------------------------------------------------------------------------------------------------------------------------------------------------------------------------------------------------------|------------------------------------------------------------|----------------------|----------------------|------------------|------------|-----------|
| Cellular Development                                                                                                                                                                                                                                                            | Maturation of lymphatic system cells                       | 7.68E-03             | 1.4                  |                  | 5          | EGA1-1    |
| Cellular Development, Hematological System Development and Function, Lymphoid Tissue Structure and Development                                                                                                                                                                  | Maturation of lymphocytes                                  | 2.07E-02             | 1.091                |                  | 4          | EGA1-1    |
| Cellular Movement                                                                                                                                                                                                                                                               | Invasion of lung cancer cell lines                         | 1.45E-02             | 1.067                |                  | 4          | EGA1-1    |
| Cell Cycle, Connective Tissue Development and Function                                                                                                                                                                                                                          | G1 phase of fibroblast cell lines                          | 2.76E-03             | 1                    |                  | 4          | EGA1-1    |
| Nervous System Development and Function                                                                                                                                                                                                                                         | Myelination of central nervous system                      | 1.48E-04             | 0.278                |                  | 4          | EGA1-1    |
| Cell Death and Survival, Cellular Function and Maintenance                                                                                                                                                                                                                      | Self-renewal of cells                                      | 2.31E-02             | -0.254               |                  | 4          | EGA1-1    |
| Cell Death and Survival                                                                                                                                                                                                                                                         | Apoptosis of squamous cell carcinoma cell lines            | 2.88E-03             | -0.655               |                  | 4          | EGA1-1    |
| Cell Death and Survival, Embryonic Development                                                                                                                                                                                                                                  | Apoptosis of embryonic cells                               | 6.88E-03             | -1.953               |                  | 4          | EGA1-1    |
| Cell Death and Survival                                                                                                                                                                                                                                                         | Cell survival of tumor cell lines                          | 6.88E-03             |                      |                  | 4          | EGA1-1    |
| Cell Cycle                                                                                                                                                                                                                                                                      | Mitosis of cervical cancer cell lines                      | 9.12E-03             |                      |                  | 4          | EGA1-1    |
| Connective Tissue Development and Function, Skeletal and Muscular System Development and Function                                                                                                                                                                               | Resorption of bone                                         | 1.98E-02             |                      |                  | 4          | EGA1-1    |
| Cell Cycle                                                                                                                                                                                                                                                                      | Aneuploidy of embryonic cell lines                         | 1.90E-05             |                      |                  | 3          | EGA1-1    |
| Cell Cycle, Respiratory System Development and Function                                                                                                                                                                                                                         | G1 phase of lung cell lines                                | 1.49E-04             |                      |                  | 3          | EGA1-1    |
| Cell Cycle                                                                                                                                                                                                                                                                      | Delay in cell cycle progression                            | 2.64E-03             |                      |                  | 3          | EGA1-1    |
| Cell Death and Survival, Cellular Function and Maintenance                                                                                                                                                                                                                      | Colony survival of tumor cell lines                        | 3.73E-03             |                      |                  | 3          | EGA1-1    |
| Gene Expression                                                                                                                                                                                                                                                                 | Transcription of mRNA                                      | 4.50E-03             |                      |                  | 3          | EGA1-1    |
| Cellular Development, Cellular Growth and Proliferation, Embryonic Development, Hematological System Development and Function, Hematopoiesis, Humoral Immune Response, Lymphoid Tissue Structure and Development, Organ Development, Organismal Development, Tissue Development | Differentiation of plasma cells                            | 4.77E-03             |                      |                  | 3          | EGA1-1    |
| Cell Morphology                                                                                                                                                                                                                                                                 | Size of tumor cell lines                                   | 5.66E-03             |                      |                  | 3          | EGA1-1    |
| Cellular Growth and Proliferation                                                                                                                                                                                                                                               | Accumulation of tumor cell lines                           | 5.98E-03             |                      |                  | 3          | EGA1-1    |
| Cell Cycle                                                                                                                                                                                                                                                                      | Arrest in G2/M phase transition                            | 8.48E-03             |                      |                  | 3          | EGA1-1    |
| Cell Cycle, Cell Morphology                                                                                                                                                                                                                                                     | Formation of spindle apparatus                             | 1.40E-02             |                      |                  | 3          | EGA1-1    |
| Cell Signaling, Nucleic Acid Metabolism, Small Molecule Biochemistry                                                                                                                                                                                                            | Binding of guanosine 5'-O-(3-thiotriphosphate)             | 1.46E-02             |                      |                  | 3          | EGA1-1    |
| Cellular Development, Cellular Growth and Proliferation, Respiratory System Development and Function                                                                                                                                                                            | Proliferation of lung cell lines                           | 1.68E-02             |                      |                  | 3          | EGA1-1    |
| Cellular Development, Cellular Growth and Proliferation, Hematological System Development and Function, Hematopoiesis                                                                                                                                                           | Expansion of hematopoietic progenitor cells                | 2.26E-02             |                      |                  | 3          | EGA1-1    |
| DNA Replication, Recombination, and Repair                                                                                                                                                                                                                                      | Meiotic nondisjunction                                     | 2.26E-02             |                      |                  | 3          | EGA1-1    |
| Carbohydrate Metabolism, Small Molecule Biochemistry                                                                                                                                                                                                                            | Catabolism of D-glucose                                    | 4.99E-05             |                      |                  | 2          | EGA1-1    |
| Tissue Development                                                                                                                                                                                                                                                              | Regeneration of muscle                                     | 1.21E-04             |                      |                  | 2          | EGA1-3    |
| Cell Cycle, Humoral Immune Response                                                                                                                                                                                                                                             | Arrest in cell cycle progression of B lymphocytes          | 2.96E-04             |                      |                  | 2          | EGA1-1    |
| Cell Morphology, Cellular Compromise                                                                                                                                                                                                                                            | Deformation of nucleus                                     | 2.96E-04             |                      |                  | 2          | EGA1-1    |
| Embryonic Development, Tissue Development                                                                                                                                                                                                                                       | Accumulation of embryonic cells                            | 4.92E-04             |                      |                  | 2          | EGA1-1    |
| Energy Production                                                                                                                                                                                                                                                               | Consumption of oxygen                                      | 5.25E-04             |                      |                  | 2          | EGA1-3    |
| Cell Cycle, Connective Tissue Development and Function                                                                                                                                                                                                                          | Delay in cell cycle progression of fibroblast cell lines   | 7.34E-04             |                      |                  | 2          | EGA1-1    |
| Cell Cycle, Connective Tissue Development and Function                                                                                                                                                                                                                          | Entry into mitosis of fibroblast cell lines                | 7.34E-04             |                      |                  | 2          | EGA1-1    |
| Cell Cycle, Connective Tissue Development and Function                                                                                                                                                                                                                          | Entry into cell cycle progression of fibroblast cell lines | 7.34E-04             |                      |                  | 2          | EGA1-1    |
| Cell Cycle, Hair and Skin Development and Function                                                                                                                                                                                                                              | Entry into S phase of epithelial cell lines                | 1.02E-03             |                      |                  | 2          | EGA1-1    |
| Cell Cycle, Respiratory System Development and Function                                                                                                                                                                                                                         | G1/S phase transition of lung cell lines                   | 1.02E-03             |                      |                  | 2          | EGA1-1    |
| Cell Morphology, Cellular Function and Maintenance                                                                                                                                                                                                                              | Autophagy of tumor cell lines                              | 1.18E-03             |                      |                  | 2          | EGA1-3    |
| Embryonic Development, Nervous System Development and Function, Organ Development, Organismal Development, Tissue Development                                                                                                                                                   | Myelination of corpus callosum                             | 1.36E-03             |                      |                  | 2          | EGA1-1    |
| Cell Cycle, Embryonic Development                                                                                                                                                                                                                                               | Cell cycle progression of embryonic cells                  | 1.36E-03             |                      |                  | 2          | EGA1-1    |
| Cell Morphology, Digestive System Development and Function, Hepatic System Development and Function, Organ Morphology, Organismal Development, Tissue Morphology                                                                                                                | Size of hepatocytes                                        | 1.36E-03             |                      |                  | 2          | EGA1-1    |
| Cellular Assembly and Organization, DNA Replication, Recombination, and Repair                                                                                                                                                                                                  | Rearrangement of chromosomes                               | 1.74E-03             |                      |                  | 2          | EGA1-1    |
| Cellular Growth and Proliferation                                                                                                                                                                                                                                               | Cloning of cells                                           | 1.74E-03             |                      |                  | 2          | EGA1-1    |
| Cell Cycle, Connective Tissue Development and Function                                                                                                                                                                                                                          | Aneuploidy of fibroblast cell lines                        | 1.74E-03             |                      |                  | 2          | EGA1-1    |
| Embryonic Development, Organismal Development                                                                                                                                                                                                                                   | Duplication of body axis                                   | 2.63E-03             |                      |                  | 2          | EGA1-1    |

|                                                                                                                                                           |                                             |          |   |        |
|-----------------------------------------------------------------------------------------------------------------------------------------------------------|---------------------------------------------|----------|---|--------|
| Cellular Development, Skeletal and Muscular System Development and Function                                                                               | Differentiation of muscle cell lines        | 2.76E-03 | 2 | EGA1-2 |
| Cell-To-Cell Signaling and Interaction, Cellular Growth and Proliferation, Connective Tissue Development and Function                                     | Stimulation of fibroblast cell lines        | 3.14E-03 | 2 | EGA1-1 |
| Cell Morphology, Hair and Skin Development and Function                                                                                                   | Size of epithelial cell lines               | 3.69E-03 | 2 | EGA1-1 |
| Cellular Development, Cellular Growth and Proliferation, Respiratory System Development and Function                                                      | Arrest in proliferation of lung cell lines  | 4.29E-03 | 2 | EGA1-1 |
| Cell Morphology, Cellular Function and Maintenance                                                                                                        | Repair of cervical cancer cell lines        | 4.29E-03 | 2 | EGA1-1 |
| Cell Morphology, Renal and Urological System Development and Function                                                                                     | Size of kidney cell lines                   | 4.93E-03 | 2 | EGA1-1 |
| Cell Morphology, Embryonic Development                                                                                                                    | Size of embryonic cell lines                | 5.60E-03 | 2 | EGA1-1 |
| Cell Cycle, Renal and Urological System Development and Function                                                                                          | G1 phase of kidney cell lines               | 5.60E-03 | 2 | EGA1-1 |
| Cell Death and Survival, Cellular Function and Maintenance                                                                                                | Self-renewal of lymphatic system cells      | 6.32E-03 | 2 | EGA1-1 |
| Gene Expression                                                                                                                                           | Synthesis of rRNA                           | 6.32E-03 | 2 | EGA1-1 |
| Cellular Movement, Hematological System Development and Function, Immune Cell Trafficking                                                                 | Mobilization of mononuclear leukocytes      | 6.32E-03 | 2 | EGA1-1 |
| DNA Replication, Recombination, and Repair, Energy Production, Molecular Transport, Nucleic Acid Metabolism, Small Molecule Biochemistry                  | Depletion of ATP                            | 7.08E-03 | 2 | EGA1-1 |
| Cellular Development, Cellular Growth and Proliferation, Connective Tissue Development and Function, Tissue Development                                   | Proliferation of synovial fibroblasts       | 7.08E-03 | 2 | EGA1-1 |
| Cellular Assembly and Organization                                                                                                                        | Activation of mitochondria                  | 7.88E-03 | 2 | EGA1-1 |
| Cell Morphology, Cellular Assembly and Organization                                                                                                       | Size of nucleus                             | 8.71E-03 | 2 | EGA1-1 |
| Carbohydrate Metabolism                                                                                                                                   | Localization of carbohydrate                | 9.58E-03 | 2 | EGA1-1 |
| Cell Cycle, Connective Tissue Development and Function                                                                                                    | Entry into S phase of fibroblasts           | 9.58E-03 | 2 | EGA1-1 |
| Cell Cycle                                                                                                                                                | Interphase of melanoma cell lines           | 1.14E-02 | 2 | EGA1-1 |
| Cell Morphology, Cellular Assembly and Organization, DNA Replication, Recombination, and Repair                                                           | Morphology of mitotic spindle               | 1.14E-02 | 2 | EGA1-1 |
| Embryonic Development, Organismal Development                                                                                                             | Gastrulation                                | 1.14E-02 | 2 | EGA1-1 |
| Cell Morphology, Connective Tissue Development and Function, Skeletal and Muscular System Development and Function, Tissue Development, Tissue Morphology | Morphology of osteoclasts                   | 1.24E-02 | 2 | EGA1-1 |
| Cell Death and Survival, Embryonic Development                                                                                                            | Apoptosis of mesenchymal cells              | 1.24E-02 | 2 | EGA1-1 |
| Cell Cycle, Connective Tissue Development and Function                                                                                                    | Entry into S phase of fibroblast cell lines | 1.34E-02 | 2 | EGA1-1 |
| Cellular Movement, Embryonic Development                                                                                                                  | Migration of mesenchymal stem cells         | 1.45E-02 | 2 | EGA1-1 |
| Cell Cycle, Embryonic Development                                                                                                                         | Arrest in G1 phase of embryonic cell lines  | 1.56E-02 | 2 | EGA1-1 |
| Cell Cycle                                                                                                                                                | Arrest in interphase of kidney cell lines   | 1.67E-02 | 2 | EGA1-1 |
| Cell Morphology, Cellular Assembly and Organization                                                                                                       | Mass of mitochondria                        | 1.67E-02 | 2 | EGA1-1 |
| Cell Cycle, Connective Tissue Development and Function                                                                                                    | G1 phase of fibroblasts                     | 1.79E-02 | 2 | EGA1-1 |
| Cell Morphology, Lymphoid Tissue Structure and Development                                                                                                | Size of lymphatic system cells              | 1.90E-02 | 2 | EGA1-1 |
| Cellular Movement                                                                                                                                         | Invasion of cervical cancer cell lines      | 1.90E-02 | 2 | EGA1-1 |
| Nervous System Development and Function, Tissue Morphology                                                                                                | Quantity of oligodendrocytes                | 1.90E-02 | 2 | EGA1-1 |
| Cell Cycle                                                                                                                                                | Initiation of S phase                       | 2.15E-02 | 2 | EGA1-1 |

a) The p-value: statistical overlap of differentially expressed gene list and gene set

b) Z-score:  $z > 1.96$  to be significantly activated or increased, and those with  $z < -1.96$  to be significantly inhibited
