# Supplementary material
Source: PubMed Central journal article supplement (PMC6417155)
Supplement: gaz001_schall_et_al._table_s12.pdf [file gaz001_schall_et_al._table_s12.pdf]

Table S12 - IPA canonical pathways unique to EGA2 super-group

| Canonical Pathways                                     | p-value <sup>a</sup> | Z-score <sup>b</sup> | Activation State | Total DEGs | Sub-Group |
|--------------------------------------------------------|----------------------|----------------------|------------------|------------|-----------|
| mTOR Signaling                                         | 3.16E-14             | 2.324                | Activated        | 38         | EGA2-1    |
| Systemic Lupus Erythematosus Signaling                 | 2.95E-06             |                      |                  | 27         | EGA2-1    |
| Huntington's Disease Signaling                         | 4.17E-03             | 0.832                |                  | 21         | EGA2-1    |
| mTOR Signaling                                         | 5.01E-12             |                      |                  | 14         | EGA2-2    |
| Estrogen Receptor Signaling                            | 1.20E-02             |                      |                  | 12         | EGA2-1    |
| Sumoylation Pathway                                    | 3.63E-03             | -0.707               |                  | 11         | EGA2-1    |
| Cyclins and Cell Cycle Regulation                      | 9.12E-03             | -0.447               |                  | 9          | EGA2-1    |
| ERK5 Signaling                                         | 8.71E-03             | 2.828                | Activated        | 8          | EGA2-1    |
| PDGF Signaling                                         | 4.79E-02             | 2.828                | Activated        | 8          | EGA2-1    |
| Neurotrophin/TRK Signaling                             | 2.09E-02             | 2.121                | Activated        | 8          | EGA2-1    |
| Remodeling of Epithelial Adherens Junctions            | 1.15E-02             |                      |                  | 8          | EGA2-1    |
| CNTF Signaling                                         | 2.14E-02             | 2.646                | Activated        | 7          | EGA2-1    |
| ErbB2-ErbB3 Signaling                                  | 3.39E-02             | 2.646                | Activated        | 7          | EGA2-1    |
| Cell Cycle: G2/M DNA Damage Checkpoint Regulation      | 5.75E-03             | 0                    |                  | 7          | EGA2-1    |
| Huntington's Disease Signaling                         | 2.57E-03             |                      |                  | 6          | EGA2-2    |
| Role of p14/p19ARF in Tumor Suppression                | 4.17E-02             | -2                   | Inhibited        | 5          | EGA2-1    |
| Purine Nucleotides De Novo Biosynthesis II             | 6.46E-05             |                      |                  | 5          | EGA2-1    |
| Pyrimidine Ribonucleotides Interconversion             | 4.90E-02             |                      |                  | 5          | EGA2-1    |
| Phagosome Maturation                                   | 1.35E-03             |                      |                  | 5          | EGA2-2    |
| RAN Signaling                                          | 5.89E-03             |                      |                  | 4          | EGA2-1    |
| Pyrimidine Deoxyribonucleotides De Novo Biosynthesis I | 1.78E-02             |                      |                  | 4          | EGA2-1    |
| 5-aminoimidazole Ribonucleotide Biosynthesis I         | 8.91E-05             |                      |                  | 3          | EGA2-1    |
| Urate Biosynthesis/Inosine 5'-phosphate Degradation    | 1.82E-02             |                      |                  | 3          | EGA2-1    |
| Telomere Extension by Telomerase                       | 2.69E-02             |                      |                  | 3          | EGA2-1    |
| Vitamin-C Transport                                    | 3.24E-02             |                      |                  | 3          | EGA2-1    |
| Hypusine Biosynthesis                                  | 5.75E-03             |                      |                  | 2          | EGA2-1    |
| Thioredoxin Pathway                                    | 3.55E-02             |                      |                  | 2          | EGA2-1    |
| Purine Nucleotides De Novo Biosynthesis II             | 1.58E-03             |                      |                  | 2          | EGA2-2    |
| Cell Cycle: G2/M DNA Damage Checkpoint Regulation      | 2.95E-02             |                      |                  | 2          | EGA2-2    |
| mTOR Signaling                                         | 2.19E-02             |                      |                  | 2          | EGA2-4    |
| Huntington's Disease Signaling                         | 3.31E-02             |                      |                  | 2          | EGA2-4    |
| PDGF Signaling                                         | 4.68E-03             |                      |                  | 2          | EGA2-4    |
| Ephrin A Signaling                                     | 2.14E-03             |                      |                  | 2          | EGA2-4    |
| Growth Hormone Signaling                               | 4.27E-03             |                      |                  | 2          | EGA2-4    |
| Neuropathic Pain Signaling In Dorsal Horn Neurons      | 7.59E-03             |                      |                  | 2          | EGA2-4    |
| Renin-Angiotensin Signaling                            | 8.51E-03             |                      |                  | 2          | EGA2-4    |
| Phagosome Formation                                    | 9.55E-03             |                      |                  | 2          | EGA2-4    |
| Tec Kinase Signaling                                   | 1.58E-02             |                      |                  | 2          | EGA2-4    |
| Neuroinflammation Signaling Pathway                    | 4.90E-02             |                      |                  | 2          | EGA2-4    |

a) The p-value: statistical overlap of differentially expressed gene list and gene set

b) Z-score:  $z > 1.96$  to be significantly activated or increased, and those with  $z < -1.96$  to be significantly inhibited
