# Supplementary material
Source: PubMed Central journal article supplement (PMC6417155)
Supplement: gaz001_schall_et_al._table_s13.pdf [file gaz001_schall_et_al._table_s13.pdf]

Table S13 - IPA biological functions unique to EGA2 super-group

| Categories                                                                                       | Functions Annotation                           | p-value <sup>a</sup> | Z-score <sup>b</sup> | Activation State | Total DEGs | Sub-Group |
|--------------------------------------------------------------------------------------------------|------------------------------------------------|----------------------|----------------------|------------------|------------|-----------|
| Cell Cycle                                                                                       | Arrest in interphase                           | 1.10E-05             |                      |                  | 50         | EGA2-1    |
| Protein Synthesis                                                                                | Synthesis of protein                           | 1.78E-10             | 2.667                | Activated        | 49         | EGA2-1    |
| Cellular Development, Cellular Growth and Proliferation                                          | Cell proliferation of carcinoma cell lines     | 1.09E-02             | 0.962                |                  | 38         | EGA2-1    |
| Cell Cycle                                                                                       | Arrest in interphase of tumor cell lines       | 4.56E-04             |                      |                  | 31         | EGA2-1    |
| Cell Death and Survival                                                                          | Cell death of colorectal cancer cell lines     | 3.56E-03             | -1.669               |                  | 29         | EGA2-1    |
| Cell Cycle                                                                                       | G1 phase of tumor cell lines                   | 1.16E-04             | 0.863                |                  | 28         | EGA2-1    |
| Cell Death and Survival                                                                          | Cell death of central nervous system cells     | 6.62E-03             | 0.772                |                  | 28         | EGA2-1    |
| Cell Death and Survival                                                                          | Cell death of melanoma cell lines              | 7.73E-04             | -0.683               |                  | 27         | EGA2-1    |
| Cell Cycle                                                                                       | G2/M phase                                     | 1.05E-05             | 1.961                | Activated        | 26         | EGA2-1    |
| Cell Cycle                                                                                       | Arrest in G1 phase                             | 5.44E-03             |                      |                  | 26         | EGA2-1    |
| Cell Death and Survival                                                                          | Cell death of sarcoma cell lines               | 2.90E-03             | -0.126               |                  | 24         | EGA2-1    |
| Cell Cycle                                                                                       | Arrest in G2 phase                             | 4.33E-05             |                      |                  | 24         | EGA2-1    |
| Gene Expression                                                                                  | Repression of RNA                              | 1.11E-04             | 3.59                 | Activated        | 23         | EGA2-1    |
| Cellular Development, Embryonic Development, Organismal Development, Tissue Development          | Differentiation of embryonic tissue            | 1.59E-02             | 1.684                |                  | 21         | EGA2-1    |
| Protein Synthesis                                                                                | Translation                                    | 4.51E-06             | 1.599                |                  | 21         | EGA2-1    |
| Cell Death and Survival                                                                          | Cell viability of breast cancer cell lines     | 8.07E-03             | 1.822                |                  | 19         | EGA2-1    |
| Cell Death and Survival                                                                          | Cell death of bone cancer cell lines           | 6.44E-03             | 0.798                |                  | 19         | EGA2-1    |
| Cell Cycle                                                                                       | G2 phase of tumor cell lines                   | 2.70E-04             | 0.216                |                  | 19         | EGA2-1    |
| Cell Cycle                                                                                       | Arrest in G1 phase of tumor cell lines         | 3.25E-03             |                      |                  | 19         | EGA2-1    |
| Cell Cycle, DNA Replication, Recombination, and Repair                                           | Homologous recombination of cells              | 8.40E-08             | 4                    | Activated        | 16         | EGA2-1    |
| Cell Death and Survival                                                                          | Cell viability of colorectal cancer cell lines | 1.77E-03             | 3.363                | Activated        | 16         | EGA2-1    |
| Cell Cycle                                                                                       | Arrest in G2/M phase                           | 1.26E-05             |                      |                  | 16         | EGA2-1    |
| DNA Replication, Recombination, and Repair, Nucleic Acid Metabolism, Small Molecule Biochemistry | Hydrolysis of nucleotide                       | 2.65E-03             | 2.562                | Activated        | 14         | EGA2-1    |
| Cell Death and Survival                                                                          | Cell death of ovarian cancer cell lines        | 6.83E-03             | -1.529               |                  | 14         | EGA2-1    |
| Cell Cycle                                                                                       | G2/M phase of tumor cell lines                 | 2.10E-04             | 1.432                |                  | 14         | EGA2-1    |
| Cell Death and Survival                                                                          | Cell death of pheochromocytoma cell lines      | 1.99E-03             | 0.84                 |                  | 14         | EGA2-1    |
| Cell Cycle                                                                                       | Interphase of fibroblast cell lines            | 4.48E-03             | -0.478               |                  | 14         | EGA2-1    |
| Cell Cycle                                                                                       | Arrest in G2 phase of tumor cell lines         | 2.65E-03             |                      |                  | 14         | EGA2-1    |
| Cellular Growth and Proliferation, Embryonic Development                                         | Pluripotency of embryonic cell lines           | 2.65E-08             | 3.494                | Activated        | 13         | EGA2-1    |
| RNA Post-Transcriptional Modification                                                            | Processing of RNA                              | 1.28E-04             | 1.826                |                  | 12         | EGA2-1    |

|                                                                                                                     |                                                   |          |        |           |    |        |
|---------------------------------------------------------------------------------------------------------------------|---------------------------------------------------|----------|--------|-----------|----|--------|
| Cell Cycle                                                                                                          | Interphase of colorectal cancer cell lines        | 9.45E-04 | 0.391  |           | 12 | EGA2-1 |
| Cell Death and Survival                                                                                             | Apoptosis of ovarian cancer cell lines            | 1.63E-02 | -1.469 |           | 11 | EGA2-1 |
| Cell Cycle                                                                                                          | Arrest in G2/M phase of tumor cell lines          | 5.87E-04 |        |           | 11 | EGA2-1 |
| Cellular Growth and Proliferation, Embryonic Development                                                            | Pluripotency of embryonic stem cell lines         | 2.72E-07 | 3.078  | Activated | 10 | EGA2-1 |
| Cellular Growth and Proliferation, Hematological System Development and Function                                    | Inhibition of leukocytes                          | 1.04E-02 | 2.601  | Activated | 10 | EGA2-1 |
| Nucleic Acid Metabolism, Small Molecule Biochemistry                                                                | Biosynthesis of nucleoside triphosphate           | 1.28E-02 | 2.049  | Activated | 10 | EGA2-1 |
| Cell Death and Survival                                                                                             | Cell death of stem cells                          | 1.55E-02 | 0.14   |           | 10 | EGA2-1 |
| Cellular Assembly and Organization, Cellular Function and Maintenance, Tissue Development                           | Formation of microtubules                         | 4.16E-03 | -1.463 |           | 9  | EGA2-1 |
| Cell Morphology, Hair and Skin Development and Function                                                             | Morphology of epithelial cell lines               | 2.26E-03 |        |           | 9  | EGA2-1 |
| Cell Cycle                                                                                                          | Cell cycle progression of connective tissue cells | 7.67E-04 |        |           | 9  | EGA2-1 |
| Cellular Development, Cellular Growth and Proliferation, Embryonic Development, Organismal Development              | Proliferation of embryonic stem cells             | 1.17E-03 | 2.804  | Activated | 8  | EGA2-1 |
| Cell Morphology, Cellular Function and Maintenance, Embryonic Development                                           | Autophagy of embryonic cell lines                 | 6.05E-03 | 2.048  | Activated | 8  | EGA2-1 |
| DNA Replication, Recombination, and Repair, Energy Production, Nucleic Acid Metabolism, Small Molecule Biochemistry | Hydrolysis of ATP                                 | 1.17E-03 | 1.912  |           | 8  | EGA2-1 |
| Protein Synthesis                                                                                                   | Synthesis of protein                              | 1.70E-03 | 1.727  |           | 8  | EGA2-2 |
| Cellular Development, Cellular Growth and Proliferation                                                             | Cell proliferation of carcinoma cell lines        | 1.43E-02 | 0.455  |           | 8  | EGA2-2 |
| Cell Cycle, Connective Tissue Development and Function                                                              | Cell cycle progression of fibroblasts             | 1.17E-03 |        |           | 8  | EGA2-1 |
| Cell Cycle                                                                                                          | Delay in mitosis                                  | 1.50E-04 |        |           | 8  | EGA2-1 |
| RNA Post-Transcriptional Modification                                                                               | Processing of rRNA                                | 2.74E-06 | 2.219  | Activated | 7  | EGA2-1 |
| Molecular Transport, RNA Trafficking                                                                                | Export of RNA                                     | 6.06E-05 | 1.982  | Activated | 7  | EGA2-1 |
| Protein Synthesis                                                                                                   | Translation                                       | 2.19E-05 | 1.72   |           | 7  | EGA2-2 |
| Cellular Compromise                                                                                                 | Degradation of mitochondria                       | 5.72E-03 | 0.819  |           | 7  | EGA2-1 |
| Hematological System Development and Function, Hematopoiesis, Tissue Morphology                                     | Quantity of hematopoietic progenitor cells        | 2.16E-03 | 0.683  |           | 7  | EGA2-2 |
| Cellular Assembly and Organization, DNA Replication, Recombination, and Repair                                      | Amplification of centrosome                       | 8.80E-03 | -0.232 |           | 7  | EGA2-1 |

|                                                                                                                                                                                        |                                                  |          |        |           |   |        |
|----------------------------------------------------------------------------------------------------------------------------------------------------------------------------------------|--------------------------------------------------|----------|--------|-----------|---|--------|
| Cell Cycle                                                                                                                                                                             | G1 phase of breast cancer cell lines             | 7.94E-03 |        |           | 7 | EGA2-1 |
| Cell Death and Survival                                                                                                                                                                | Cell death of sarcoma cell lines                 | 5.42E-03 | -2.433 | Inhibited | 6 | EGA2-2 |
| Gene Expression                                                                                                                                                                        | Initiation of transcription                      | 7.14E-03 | 1.664  |           | 6 | EGA2-1 |
| Molecular Transport, Protein Trafficking                                                                                                                                               | Internalization of protein                       | 9.13E-03 | 1.387  |           | 6 | EGA2-1 |
| Cell Cycle                                                                                                                                                                             | Cleavage of tumor cell lines                     | 1.52E-03 |        |           | 6 | EGA2-1 |
| Cell Cycle                                                                                                                                                                             | Cell cycle progression of bone cancer cell lines | 8.09E-03 |        |           | 6 | EGA2-1 |
| Cell Cycle                                                                                                                                                                             | G2 phase of colorectal cancer cell lines         | 1.25E-03 |        |           | 6 | EGA2-1 |
| Cellular Function and Maintenance, Small Molecule Biochemistry                                                                                                                         | Homeostasis of metal ion                         | 1.28E-02 |        |           | 6 | EGA2-1 |
| Cell Cycle                                                                                                                                                                             | Exit from G1 phase                               | 1.70E-05 |        |           | 6 | EGA2-1 |
| Cellular Assembly and Organization, Cellular Function and Maintenance                                                                                                                  | Formation of ribosome                            | 2.48E-04 | 2.236  | Activated | 5 | EGA2-1 |
| Cell Death and Survival, Cellular Development, Cellular Function and Maintenance, Cellular Growth and Proliferation, Embryonic Development, Organismal Development, Tissue Development | Self-renewal of neural stem cells                | 4.39E-03 | 2.186  | Activated | 5 | EGA2-1 |
| Cell Death and Survival                                                                                                                                                                | Cell death of bone cancer cell lines             | 8.36E-03 | -2.219 | Inhibited | 5 | EGA2-2 |
| Cardiovascular System Development and Function, Organ Development, Organ Morphology                                                                                                    | Contraction of heart ventricle                   | 1.20E-03 | -1.387 |           | 5 | EGA2-1 |
| Cellular Movement                                                                                                                                                                      | Invasion of stomach cancer cell lines            | 1.54E-03 | 0.728  |           | 5 | EGA2-1 |
| Cell Cycle, Cellular Development, Connective Tissue Development and Function                                                                                                           | Premature senescence of fibroblast cell lines    | 3.64E-03 | -0.6   |           | 5 | EGA2-1 |
| Gene Expression, RNA Post-Transcriptional Modification                                                                                                                                 | Binding of RNA                                   | 1.46E-02 | -0.152 |           | 5 | EGA2-1 |
| DNA Replication, Recombination, and Repair                                                                                                                                             | Repair of DNA                                    | 1.01E-02 | 0.054  |           | 5 | EGA2-2 |
| Cellular Growth and Proliferation                                                                                                                                                      | Cytostasis of connective tissue cells            | 1.13E-02 | 0      |           | 5 | EGA2-1 |
| Cell Cycle, Connective Tissue Development and Function                                                                                                                                 | Mitosis of fibroblast cell lines                 | 9.80E-03 |        |           | 5 | EGA2-1 |
| Cell Cycle                                                                                                                                                                             | Arrest in G1 phase of lung cancer cell lines     | 1.65E-02 |        |           | 5 | EGA2-1 |
| Cell Cycle                                                                                                                                                                             | G2/M phase of colorectal cancer cell lines       | 2.48E-04 |        |           | 5 | EGA2-1 |
| Cell Cycle                                                                                                                                                                             | Arrest in G1 phase of breast cancer cell lines   | 1.65E-02 |        |           | 5 | EGA2-1 |
| Cardiovascular System Development and Function, Cell Morphology, Organ Morphology, Organismal Development                                                                              | Morphology of heart cells                        | 7.63E-03 |        |           | 5 | EGA2-2 |

|                                                                                                                                              |                                                             |          |        |           |   |        |
|----------------------------------------------------------------------------------------------------------------------------------------------|-------------------------------------------------------------|----------|--------|-----------|---|--------|
| Embryonic Development, Hair and Skin Development and Function, Organ Development, Organismal Development, Tissue Development                 | Formation of epidermis                                      | 1.16E-05 |        |           | 5 | EGA2-2 |
| Lymphoid Tissue Structure and Development, Tissue Morphology                                                                                 | Quantity of lymphoid tissue                                 | 1.03E-02 |        |           | 5 | EGA2-2 |
| Digestive System Development and Function, Organ Morphology                                                                                  | Permeability of intestine                                   | 1.51E-02 | 1.987  | Activated | 4 | EGA2-1 |
| Cell Morphology, Cellular Function and Maintenance                                                                                           | Autophagy of bone cancer cell lines                         | 1.51E-02 | 1.974  | Activated | 4 | EGA2-1 |
| RNA Damage and Repair                                                                                                                        | Decay of RNA                                                | 2.03E-03 | 1.067  |           | 4 | EGA2-1 |
| Cell Death and Survival                                                                                                                      | Cell viability of gastrointestinal stromal tumor cell lines | 4.64E-03 | 1.067  |           | 4 | EGA2-1 |
| Cell Death and Survival                                                                                                                      | Cell death of immune cells                                  | 1.54E-02 | -0.775 |           | 4 | EGA2-4 |
| Cell Death and Survival                                                                                                                      | Apoptosis of synovial fibroblasts                           | 1.51E-02 | -0.277 |           | 4 | EGA2-1 |
| Connective Tissue Development and Function, Tissue Development                                                                               | Maturation of connective tissue                             | 1.03E-03 | -0.218 |           | 4 | EGA2-2 |
| Carbohydrate Metabolism, Molecular Transport                                                                                                 | Transport of monocarboxylic acid                            | 1.45E-03 |        |           | 4 | EGA2-1 |
| Cellular Development, Cellular Growth and Proliferation, Embryonic Development, Organismal Development, Tissue Development                   | Development of embryonic stem cells                         | 1.28E-02 |        |           | 4 | EGA2-1 |
| Embryonic Development, Organismal Development, Reproductive System Development and Function                                                  | Implantation of embryo                                      | 1.51E-02 |        |           | 4 | EGA2-1 |
| Cell Death and Survival, Connective Tissue Development and Function                                                                          | Cell survival of fibroblast cell lines                      | 2.03E-03 |        |           | 4 | EGA2-1 |
| Cell Death and Survival, Organismal Survival                                                                                                 | Survival of yeast                                           | 5.85E-03 |        |           | 4 | EGA2-1 |
| Cell Morphology, Cellular Assembly and Organization, Cellular Function and Maintenance                                                       | Reorganization of cytoskeleton                              | 1.94E-02 |        |           | 4 | EGA2-2 |
| Hematological System Development and Function, Hematopoiesis, Lymphoid Tissue Structure and Development, Organ Morphology, Tissue Morphology | Quantity of thymocytes                                      | 6.73E-03 |        |           | 4 | EGA2-2 |
| Carbohydrate Metabolism, Molecular Transport, Small Molecule Biochemistry                                                                    | Uptake of D-glucose                                         | 1.61E-04 |        |           | 4 | EGA2-4 |
| Cell Morphology, Cellular Assembly and Organization, Nervous System Development and Function, Tissue Morphology                              | Size of dendritic trees                                     | 1.11E-02 |        |           | 3 | EGA2-1 |
| Cellular Assembly and Organization                                                                                                           | Stabilization of mitochondria                               | 6.05E-03 |        |           | 3 | EGA2-1 |

|                                                                                                                                                                                                  |                                                  |          |   |        |
|--------------------------------------------------------------------------------------------------------------------------------------------------------------------------------------------------|--------------------------------------------------|----------|---|--------|
| Cell Morphology, Cellular Function and Maintenance                                                                                                                                               | Mitochondrial membrane potential                 | 1.11E-02 | 3 | EGA2-1 |
| Cell Signaling, Cellular Function and Maintenance, Small Molecule Biochemistry, Vitamin and Mineral Metabolism                                                                                   | Calcium homeostasis of endoplasmic reticulum     | 1.59E-03 | 3 | EGA2-1 |
| Protein Synthesis                                                                                                                                                                                | Initiation of synthesis of protein               | 6.05E-03 | 3 | EGA2-1 |
| Cellular Assembly and Organization, DNA Replication, Recombination, and Repair                                                                                                                   | Formation of nucleosomes                         | 2.70E-03 | 3 | EGA2-1 |
| Small Molecule Biochemistry                                                                                                                                                                      | Synthesis of polyamines                          | 8.36E-03 | 3 | EGA2-1 |
| Cell Death and Survival                                                                                                                                                                          | Cell death of megakaryocytes                     | 8.36E-03 | 3 | EGA2-1 |
| Cell Cycle                                                                                                                                                                                       | Mitotic exit of cervical cancer cell lines       | 8.36E-03 | 3 | EGA2-1 |
| Cell Death and Survival                                                                                                                                                                          | Apoptosis of bone marrow-derived neutrophils     | 8.36E-03 | 3 | EGA2-1 |
| Cell-To-Cell Signaling and Interaction                                                                                                                                                           | Aggregation of carcinoma cell lines              | 1.11E-02 | 3 | EGA2-1 |
| Nucleic Acid Metabolism, Small Molecule Biochemistry                                                                                                                                             | Synthesis of nucleoside 5'-phosphate             | 1.59E-03 | 3 | EGA2-1 |
| Cell Cycle                                                                                                                                                                                       | Delay in interphase of fibroblast cell lines     | 8.36E-03 | 3 | EGA2-1 |
| Cell Cycle                                                                                                                                                                                       | Arrest in cleavage of cells                      | 2.70E-03 | 3 | EGA2-1 |
| Cell-To-Cell Signaling and Interaction, Hair and Skin Development and Function                                                                                                                   | Aggregation of epithelial cell lines             | 2.70E-03 | 3 | EGA2-1 |
| Digestive System Development and Function, Hematological System Development and Function, Lymphoid Tissue Structure and Development, Organ Morphology, Organismal Development, Tissue Morphology | Morphology of Peyer's patches                    | 6.05E-03 | 3 | EGA2-1 |
| RNA Damage and Repair                                                                                                                                                                            | Decay of mRNA                                    | 6.05E-03 | 3 | EGA2-1 |
| Cell Cycle, Gene Expression                                                                                                                                                                      | Binding of KIF5 binding site                     | 8.82E-05 | 3 | EGA2-1 |
| Cell Morphology, Skeletal and Muscular System Development and Function                                                                                                                           | Morphology of muscle cell lines                  | 8.36E-03 | 3 | EGA2-1 |
| Cell Cycle, Skeletal and Muscular System Development and Function                                                                                                                                | Arrest in cell cycle progression of muscle cells | 6.05E-03 | 3 | EGA2-1 |
| Cellular Assembly and Organization                                                                                                                                                               | Opening of permeability transition pores         | 1.43E-02 | 3 | EGA2-1 |

|                                                                                                                                                                                                                                                                                                                          |                                              |          |   |        |
|--------------------------------------------------------------------------------------------------------------------------------------------------------------------------------------------------------------------------------------------------------------------------------------------------------------------------|----------------------------------------------|----------|---|--------|
| Cell-mediated Immune Response, Cellular Development, Cellular Function and Maintenance, Cellular Growth and Proliferation, Embryonic Development, Hematological System Development and Function, Hematopoiesis, Lymphoid Tissue Structure and Development, Organ Development, Organismal Development, Tissue Development | Production of natural killer precursor cells | 4.17E-03 | 3 | EGA2-1 |
| Cell Cycle                                                                                                                                                                                                                                                                                                               | Mitosis of liver cells                       | 1.43E-02 | 3 | EGA2-1 |
| DNA Replication, Recombination, and Repair, RNA Post-Transcriptional Modification                                                                                                                                                                                                                                        | Annealing of hnRNA                           | 8.82E-05 | 3 | EGA2-1 |
| Nucleic Acid Metabolism, Small Molecule Biochemistry                                                                                                                                                                                                                                                                     | Synthesis of ribonucleoside monophosphate    | 3.41E-04 | 3 | EGA2-1 |
| Cell Cycle, Cell Morphology, Cellular Assembly and Organization, DNA Replication, Recombination, and Repair                                                                                                                                                                                                              | Morphology of chromatin                      | 6.05E-03 | 3 | EGA2-1 |
| DNA Replication, Recombination, and Repair                                                                                                                                                                                                                                                                               | Replication of genomic DNA                   | 1.11E-02 | 3 | EGA2-1 |
| Cellular Development, Cellular Growth and Proliferation, Connective Tissue Development and Function, Hematological System Development and Function, Hematopoiesis, Organismal Development, Tissue Development                                                                                                            | Maturation of red blood cells                | 4.77E-04 | 3 | EGA2-2 |
| Cellular Development, Cellular Growth and Proliferation, Connective Tissue Development and Function, Hematological System Development and Function, Lymphoid Tissue Structure and Development, Tissue Development                                                                                                        | Proliferation of peripheral blood leukocytes | 6.48E-03 | 3 | EGA2-2 |
| Cellular Development, Hematological System Development and Function, Hematopoiesis                                                                                                                                                                                                                                       | Maturation of hematopoietic progenitor cells | 1.11E-02 | 3 | EGA2-2 |
| Cell Death and Survival                                                                                                                                                                                                                                                                                                  | Cell viability of leukemia cell lines        | 1.15E-02 | 3 | EGA2-2 |
| Lipid Metabolism, Small Molecule Biochemistry                                                                                                                                                                                                                                                                            | Metabolism of glycosphingolipid              | 1.30E-02 | 3 | EGA2-2 |
| Cell Death and Survival, Hematological System Development and Function                                                                                                                                                                                                                                                   | Cell viability of leukocyte cell lines       | 1.15E-02 | 3 | EGA2-2 |
| Cell Cycle, Embryonic Development                                                                                                                                                                                                                                                                                        | Interphase of embryonic cell lines           | 1.72E-02 | 3 | EGA2-2 |
| Cellular Compromise                                                                                                                                                                                                                                                                                                      | Stress response of tumor cell lines          | 3.61E-03 | 3 | EGA2-2 |

|                                                                                                                                                                                                                                                                                                                          |                                                  |          |   |        |
|--------------------------------------------------------------------------------------------------------------------------------------------------------------------------------------------------------------------------------------------------------------------------------------------------------------------------|--------------------------------------------------|----------|---|--------|
| Cell Death and Survival                                                                                                                                                                                                                                                                                                  | Cell viability of stem cells                     | 4.59E-03 | 3 | EGA2-2 |
| Cardiovascular System Development and Function, Cell Death and Survival                                                                                                                                                                                                                                                  | Cell viability of endothelial cells              | 6.48E-03 | 3 | EGA2-2 |
| Cell Morphology, Cellular Function and Maintenance, DNA Replication, Recombination, and Repair                                                                                                                                                                                                                           | Double-stranded DNA break repair of cells        | 7.57E-03 | 3 | EGA2-2 |
| Cellular Assembly and Organization, DNA Replication, Recombination, and Repair                                                                                                                                                                                                                                           | Formation of gamma H2AX nuclear focus            | 5.97E-03 | 3 | EGA2-2 |
| Organismal Survival                                                                                                                                                                                                                                                                                                      | Viability                                        | 1.68E-02 | 3 | EGA2-2 |
| Cell Cycle                                                                                                                                                                                                                                                                                                               | Arrest in interphase of carcinoma cell lines     | 5.72E-03 | 3 | EGA2-2 |
| Cell Cycle                                                                                                                                                                                                                                                                                                               | Arrest in G1/S phase transition                  | 7.57E-03 | 3 | EGA2-2 |
| Embryonic Development, Organ Development, Organismal Development, Tissue Development                                                                                                                                                                                                                                     | Development of sensory organ                     | 5.00E-03 | 3 | EGA2-4 |
| Cellular Movement, Embryonic Development                                                                                                                                                                                                                                                                                 | Cell movement of embryonic cell lines            | 1.76E-03 | 3 | EGA2-4 |
| Cell Death and Survival                                                                                                                                                                                                                                                                                                  | Cell death of thymocytes                         | 5.43E-04 | 3 | EGA2-4 |
| Cell Death and Survival, Hematological System Development and Function                                                                                                                                                                                                                                                   | Survival of Single positive thymocytes           | 5.77E-03 | 2 | EGA2-1 |
| Cellular Development                                                                                                                                                                                                                                                                                                     | Epithelial-mesenchymal transition of pneumocytes | 5.77E-03 | 2 | EGA2-1 |
| Cell Cycle, Renal and Urological System Development and Function                                                                                                                                                                                                                                                         | Initiation of S phase of kidney cell lines       | 1.98E-03 | 2 | EGA2-1 |
| Cell Death and Survival                                                                                                                                                                                                                                                                                                  | Cell death of spleen-derived dendritic cells     | 1.98E-03 | 2 | EGA2-1 |
| Cell-mediated Immune Response, Cellular Development, Cellular Function and Maintenance, Cellular Growth and Proliferation, Embryonic Development, Hematological System Development and Function, Hematopoiesis, Lymphoid Tissue Structure and Development, Organ Development, Organismal Development, Tissue Development | Transition of double-positive thymocyte          | 5.77E-03 | 2 | EGA2-1 |
| Lipid Metabolism, Molecular Transport, Small Molecule Biochemistry                                                                                                                                                                                                                                                       | Quantity of ursodeoxycholic acid                 | 5.77E-03 | 2 | EGA2-1 |
| Cellular Assembly and Organization                                                                                                                                                                                                                                                                                       | Movement of chromosomes                          | 1.12E-02 | 2 | EGA2-1 |
| Lipid Metabolism, Molecular Transport, Small Molecule Biochemistry                                                                                                                                                                                                                                                       | Uptake of butyric acid                           | 1.12E-02 | 2 | EGA2-1 |

|                                                                                                         |                                                           |          |   |        |
|---------------------------------------------------------------------------------------------------------|-----------------------------------------------------------|----------|---|--------|
| Cell Death and Survival, Cellular Function and Maintenance                                              | Clearance of nontypeable Haemophilus influenzae strain 12 | 1.12E-02 | 2 | EGA2-1 |
| Cellular Development, Cellular Growth and Proliferation, Embryonic Development, Organismal Development  | Arrest in growth of neuronal progenitor cells             | 1.12E-02 | 2 | EGA2-1 |
| Cell-To-Cell Signaling and Interaction                                                                  | Aggregation of skin cell lines                            | 1.12E-02 | 2 | EGA2-1 |
| Nucleic Acid Metabolism, Small Molecule Biochemistry                                                    | Synthesis of GMP                                          | 5.77E-03 | 2 | EGA2-1 |
| Cell Cycle                                                                                              | Arrest in cell division of tumor cell lines               | 1.98E-03 | 2 | EGA2-1 |
| Cell Cycle, Reproductive System Development and Function                                                | G2/M phase of breast cell lines                           | 5.77E-03 | 2 | EGA2-1 |
| Cellular Assembly and Organization                                                                      | Binding of chromosomes                                    | 1.12E-02 | 2 | EGA2-1 |
| Molecular Transport, RNA Trafficking                                                                    | Export of tRNA                                            | 1.12E-02 | 2 | EGA2-1 |
| Lipid Metabolism, Small Molecule Biochemistry                                                           | Production of C18-ceramide                                | 1.12E-02 | 2 | EGA2-1 |
| Nucleic Acid Metabolism, Small Molecule Biochemistry                                                    | Synthesis of GDP                                          | 1.12E-02 | 2 | EGA2-1 |
| Cellular Assembly and Organization                                                                      | Formation of apoptosome                                   | 5.77E-03 | 2 | EGA2-1 |
| Cell Death and Survival                                                                                 | Killing of bone marrow-derived dendritic cells            | 1.98E-03 | 2 | EGA2-1 |
| Protein Synthesis                                                                                       | Elongation of protein                                     | 1.12E-02 | 2 | EGA2-1 |
| Cell Signaling, Nucleic Acid Metabolism, Small Molecule Biochemistry                                    | Synthesis of GTP                                          | 1.98E-03 | 2 | EGA2-1 |
| Lipid Metabolism, Small Molecule Biochemistry, Vitamin and Mineral Metabolism                           | Synthesis of retinyl ester                                | 1.12E-02 | 2 | EGA2-1 |
| Carbohydrate Metabolism, Lipid Metabolism, Small Molecule Biochemistry                                  | Transmission of lipopolysaccharide                        | 1.12E-02 | 2 | EGA2-1 |
| Cellular Compromise                                                                                     | Disorganization of actin                                  | 1.98E-03 | 2 | EGA2-1 |
| Carbohydrate Metabolism, Lipid Metabolism, Small Molecule Biochemistry                                  | Binding of phosphatidylinositol-3-phosphate               | 1.12E-02 | 2 | EGA2-1 |
| Cellular Development, Cellular Growth and Proliferation, Tissue Development                             | Proliferation of glandular epithelial cells               | 5.77E-03 | 2 | EGA2-1 |
| Cell Cycle, Embryonic Development                                                                       | Mitosis of embryonic stem cells                           | 5.77E-03 | 2 | EGA2-1 |
| Cardiovascular System Development and Function, Cellular Development, Cellular Growth and Proliferation | Arrest in growth of endothelial cell lines                | 5.77E-03 | 2 | EGA2-1 |



|                                                                                                                                                                                                               |                                              |          |   |        |
|---------------------------------------------------------------------------------------------------------------------------------------------------------------------------------------------------------------|----------------------------------------------|----------|---|--------|
| Cellular Development, Cellular Growth and Proliferation, Connective Tissue Development and Function, Hematological System Development and Function, Hematopoiesis, Organismal Development, Tissue Development | Differentiation of reticulocytes             | 1.98E-03 | 2 | EGA2-1 |
| Cellular Development, Cellular Growth and Proliferation, Connective Tissue Development and Function, Hair and Skin Development and Function, Organ Development, Tissue Development                            | Arrest in growth of keratinocytes            | 1.12E-02 | 2 | EGA2-1 |
| Carbohydrate Metabolism, Small Molecule Biochemistry                                                                                                                                                          | Length of heparan sulfate                    | 1.12E-02 | 2 | EGA2-1 |
| RNA Post-Transcriptional Modification                                                                                                                                                                         | Maturation of rRNA                           | 5.77E-03 | 2 | EGA2-1 |
| Cellular Assembly and Organization, Cellular Function and Maintenance                                                                                                                                         | Formation of monosome                        | 1.98E-03 | 2 | EGA2-1 |
| Cell Morphology, Cellular Assembly and Organization, Cellular Function and Maintenance                                                                                                                        | Permeability of mitochondrial outer membrane | 1.12E-02 | 2 | EGA2-1 |
| Cellular Assembly and Organization                                                                                                                                                                            | Recruitment of vesicles                      | 1.12E-02 | 2 | EGA2-1 |
| Cell Cycle                                                                                                                                                                                                    | Arrest in G2 phase of endothelial cell lines | 1.98E-03 | 2 | EGA2-1 |
| Molecular Transport, Protein Trafficking                                                                                                                                                                      | Import of green fluorescent protein          | 1.12E-02 | 2 | EGA2-1 |
| Cellular Assembly and Organization                                                                                                                                                                            | Structural integrity of nucleosomes          | 5.77E-03 | 2 | EGA2-1 |
| Cellular Movement                                                                                                                                                                                             | Migratory capacity of melanoma cell lines    | 5.77E-03 | 2 | EGA2-1 |
| Cellular Assembly and Organization, Cellular Function and Maintenance                                                                                                                                         | Formation of ribosome                        | 2.60E-03 | 2 | EGA2-2 |
| Cell Death and Survival, Hematological System Development and Function                                                                                                                                        | Cell viability of mast cells                 | 1.10E-02 | 2 | EGA2-2 |
| Cellular Development, Cellular Growth and Proliferation, Hair and Skin Development and Function, Tissue Development                                                                                           | Proliferation of melanocytes                 | 8.24E-03 | 2 | EGA2-2 |
| Cellular Compromise, DNA Replication, Recombination, and Repair                                                                                                                                               | Degradation of chromosomes                   | 6.41E-03 | 2 | EGA2-2 |
| Cellular Compromise                                                                                                                                                                                           | Damage of cellular membrane                  | 5.31E-03 | 2 | EGA2-2 |
| Cell Cycle                                                                                                                                                                                                    | Arrest in G1 phase of carcinoma cell lines   | 1.25E-02 | 2 | EGA2-2 |
| Tissue Morphology                                                                                                                                                                                             | Quantity of carcinoma cell lines             | 8.89E-03 | 2 | EGA2-2 |

|                                                                                                                                             |                                                          |          |   |        |
|---------------------------------------------------------------------------------------------------------------------------------------------|----------------------------------------------------------|----------|---|--------|
| Cellular Development, Connective Tissue Development and Function, Skeletal and Muscular System Development and Function, Tissue Development | Maturation of osteoclasts                                | 2.24E-03 | 2 | EGA2-2 |
| Post-Translational Modification, Protein Folding                                                                                            | Folding of protein                                       | 5.85E-03 | 2 | EGA2-2 |
| Cardiovascular System Development and Function, Organ Development                                                                           | Cardiac output                                           | 9.57E-03 | 2 | EGA2-2 |
| Cellular Movement                                                                                                                           | Migration of prostate cancer cells                       | 1.30E-03 | 2 | EGA2-2 |
| Cellular Compromise                                                                                                                         | Disassembly of actin filaments                           | 2.03E-02 | 2 | EGA2-2 |
| Cellular Assembly and Organization, DNA Replication, Recombination, and Repair                                                              | Stabilization of chromosomes                             | 8.24E-03 | 2 | EGA2-2 |
| Cell Morphology, Cellular Function and Maintenance, Connective Tissue Development and Function, DNA Replication, Recombination, and Repair  | Double-stranded DNA break repair of fibroblasts          | 4.41E-04 | 2 | EGA2-2 |
| Cellular Growth and Proliferation                                                                                                           | Pluripotency of fibroblast cell lines                    | 2.99E-03 | 2 | EGA2-2 |
| Digestive System Development and Function, Organ Morphology, Tissue Morphology                                                              | Quantity of intestinal cells                             | 1.25E-02 | 2 | EGA2-2 |
| Cellular Assembly and Organization                                                                                                          | Fusion of chromosomes                                    | 3.84E-03 | 2 | EGA2-2 |
| Cell Cycle                                                                                                                                  | Cell cycle progression of hematopoietic progenitor cells | 1.94E-02 | 2 | EGA2-2 |
| Cell Cycle                                                                                                                                  | Entry into S phase of leukocytes                         | 2.60E-03 | 2 | EGA2-2 |
| Cellular Function and Maintenance, Tissue Development                                                                                       | Organization of muscle cells                             | 6.41E-03 | 2 | EGA2-2 |
| Cellular Development, Embryonic Development                                                                                                 | Reprogramming of embryonic cell lines                    | 5.85E-03 | 2 | EGA2-2 |
| Cellular Assembly and Organization                                                                                                          | Quantity of ribosome                                     | 2.95E-04 | 2 | EGA2-2 |
| Cellular Compromise                                                                                                                         | Oxidative stress response of tumor cell lines            | 2.24E-03 | 2 | EGA2-2 |
| Cell Cycle                                                                                                                                  | S phase of carcinoma cell lines                          | 1.03E-02 | 2 | EGA2-2 |
| Tissue Morphology                                                                                                                           | Quantity of lung cancer cell lines                       | 2.24E-03 | 2 | EGA2-2 |
| Cellular Assembly and Organization                                                                                                          | Sealing of cellular membrane                             | 1.59E-03 | 2 | EGA2-2 |
| Cell Cycle                                                                                                                                  | S phase of lung cancer cell lines                        | 3.84E-03 | 2 | EGA2-2 |
| Cell Death and Survival, Cellular Development, Cellular Function and Maintenance, Embryonic Development                                     | Self-renewal of embryonic stem cell lines                | 2.60E-03 | 2 | EGA2-2 |
| Cellular Compromise                                                                                                                         | Permeability transition of mitochondria                  | 7.00E-03 | 2 | EGA2-2 |
| Cell-To-Cell Signaling and Interaction, Small Molecule Biochemistry                                                                         | Synthesis of neurotransmitter                            | 1.84E-02 | 2 | EGA2-2 |

|                                                                                                                                                                                                                                                             |                                              |          |   |        |
|-------------------------------------------------------------------------------------------------------------------------------------------------------------------------------------------------------------------------------------------------------------|----------------------------------------------|----------|---|--------|
| Cell Morphology, Cellular Assembly and Organization, Cellular Development, Cellular Function and Maintenance, Cellular Growth and Proliferation, Embryonic Development, Nervous System Development and Function, Organismal Development, Tissue Development | Outgrowth of dendrites                       | 1.17E-02 | 2 | EGA2-2 |
| Cellular Assembly and Organization                                                                                                                                                                                                                          | Binding of ribosome                          | 1.30E-03 | 2 | EGA2-2 |
| Embryonic Development, Hair and Skin Development and Function, Organ Development, Organismal Development, Tissue Development                                                                                                                                | Formation of hair follicle                   | 1.41E-02 | 2 | EGA2-2 |
| Cellular Response to Therapeutics                                                                                                                                                                                                                           | Radiosensitivity of tumor cell lines         | 1.58E-02 | 2 | EGA2-2 |
| Cellular Development, Cellular Growth and Proliferation, Connective Tissue Development and Function, Hematological System Development and Function, Hematopoiesis, Organismal Development, Tissue Development                                               | Maturation of erythroid precursor cells      | 8.24E-03 | 2 | EGA2-2 |
| Cardiovascular System Development and Function                                                                                                                                                                                                              | Survival of heart                            | 2.03E-02 | 2 | EGA2-2 |
| Cellular Development, Cellular Growth and Proliferation, Connective Tissue Development and Function, Tissue Development                                                                                                                                     | Development of fibroblasts                   | 1.66E-02 | 2 | EGA2-2 |
| Cellular Development, Embryonic Development, Organismal Development, Tissue Development                                                                                                                                                                     | Differentiation of embryonic tissue          | 4.11E-02 | 2 | EGA2-4 |
| Cell Death and Survival                                                                                                                                                                                                                                     | Cell death of ovarian cancer cell lines      | 1.25E-02 | 2 | EGA2-4 |
| Cellular Movement                                                                                                                                                                                                                                           | Invasion of fibroblast cell lines            | 3.39E-03 | 2 | EGA2-4 |
| Cellular Movement                                                                                                                                                                                                                                           | Cell movement of tumor cells                 | 2.68E-02 | 2 | EGA2-4 |
| Cell Death and Survival                                                                                                                                                                                                                                     | Apoptosis of B-lymphocyte derived cell lines | 1.06E-02 | 2 | EGA2-4 |
| Carbohydrate Metabolism, Cellular Function and Maintenance, Molecular Transport, Small Molecule Biochemistry                                                                                                                                                | Transport of D-glucose                       | 4.32E-03 | 2 | EGA2-4 |
| Cellular Movement, Connective Tissue Development and Function                                                                                                                                                                                               | Cell movement of fibroblast cell lines       | 3.31E-02 | 2 | EGA2-4 |
| Carbohydrate Metabolism, Molecular Transport                                                                                                                                                                                                                | Transport of dehydroascorbic acid            | 3.76E-06 | 2 | EGA2-4 |

|                                                                                                                                            |                                         |          |   |        |
|--------------------------------------------------------------------------------------------------------------------------------------------|-----------------------------------------|----------|---|--------|
| Embryonic Development, Organ Development, Organismal Development, Renal and Urological System Development and Function, Tissue Development | Formation of kidney                     | 1.73E-02 | 2 | EGA2-4 |
| Embryonic Development, Organ Development, Organismal Development, Respiratory System Development and Function, Tissue Development          | Formation of pulmonary alveolus         | 8.21E-05 | 2 | EGA2-4 |
| Cell Death and Survival                                                                                                                    | Apoptosis of thymocytes                 | 8.24E-03 | 2 | EGA2-4 |
| Cell Morphology, Cellular Function and Maintenance                                                                                         | Transmembrane potential of mitochondria | 3.16E-02 | 2 | EGA2-4 |
| Carbohydrate Metabolism, Molecular Transport, Small Molecule Biochemistry                                                                  | Uptake of 2-deoxyglucose                | 9.19E-03 | 2 | EGA2-4 |
| Cell-To-Cell Signaling and Interaction                                                                                                     | Adhesion of connective tissue cells     | 1.95E-02 | 2 | EGA2-4 |

a) The p-value: statistical overlap of differentially expressed gene list and gene set

b) Z-score:  $z > 1.96$  to be significantly activated or increased, and those with  $z < -1.96$  to be significantly inhibited
