# Supplementary material
Source: PubMed Central journal article supplement (PMC6417155)
Supplement: gaz001_schall_et_al._table_s14.pdf [file gaz001_schall_et_al._table_s14.pdf]

Table S14 - IPA canonical pathways unique to EGA3 super-group

| Canonical Pathways                                         | p-value <sup>a</sup> | Z-score <sup>b</sup> | Activation State | Total DEGs | Sub-Group |
|------------------------------------------------------------|----------------------|----------------------|------------------|------------|-----------|
| Mitochondrial Dysfunction                                  | 4.57E-09             |                      |                  | 19         | EGA3-1    |
| Oxidative Phosphorylation                                  | 7.94E-08             |                      |                  | 14         | EGA3-1    |
| LPS/IL-1 Mediated Inhibition of RXR Function               | 2.95E-03             | -1.342               |                  | 12         | EGA3-1    |
| ILK Signaling                                              | 9.77E-03             | 0                    |                  | 10         | EGA3-1    |
| Agranulocyte Adhesion and Diapedesis                       | 2.14E-02             |                      |                  | 9          | EGA3-1    |
| Glucocorticoid Receptor Signaling                          | 1.55E-02             |                      |                  | 6          | EGA3-2    |
| Regulation of Actin-based Motility by Rho                  | 4.27E-02             | 2                    | Activated        | 5          | EGA3-1    |
| Hypoxia Signaling in the Cardiovascular System             | 2.19E-02             |                      |                  | 5          | EGA3-1    |
| TCA Cycle II (Eukaryotic)                                  | 1.51E-03             |                      |                  | 4          | EGA3-1    |
| Actin Nucleation by ARP-WASP Complex                       | 4.47E-03             |                      |                  | 3          | EGA3-2    |
| Retinoic acid Mediated Apoptosis Signaling                 | 5.89E-03             |                      |                  | 3          | EGA3-2    |
| Glioma Invasiveness Signaling                              | 8.13E-03             |                      |                  | 3          | EGA3-2    |
| Regulation of Actin-based Motility by Rho                  | 1.62E-02             |                      |                  | 3          | EGA3-2    |
| PPAR Signaling                                             | 1.86E-02             |                      |                  | 3          | EGA3-2    |
| Mitochondrial L-carnitine Shuttle Pathway                  | 5.25E-03             |                      |                  | 3          | EGA3-1    |
| DNA Double-Strand Break Repair by Homologous Recombination | 3.02E-03             |                      |                  | 2          | EGA3-2    |
| Methylglyoxal Degradation III                              | 5.50E-03             |                      |                  | 2          | EGA3-2    |
| Endoplasmic Reticulum Stress Pathway                       | 6.76E-03             |                      |                  | 2          | EGA3-2    |
| Semaphorin Signaling in Neurons                            | 3.89E-02             |                      |                  | 2          | EGA3-2    |
| Cell Cycle Control of Chromosomal Replication              | 4.37E-02             |                      |                  | 2          | EGA3-2    |
| Glutamate Receptor Signaling                               | 5.13E-04             |                      |                  | 2          | EGA3-4    |
| Interferon Signaling                                       | 5.37E-04             |                      |                  | 2          | EGA3-3    |
| Folate Polyglutamylation                                   | 4.37E-03             |                      |                  | 2          | EGA3-1    |
| Glycine Cleavage Complex                                   | 6.46E-03             |                      |                  | 2          | EGA3-1    |
| Arginine Degradation VI (Arginase 2 Pathway)               | 6.46E-03             |                      |                  | 2          | EGA3-1    |
| Ceramide Biosynthesis                                      | 8.91E-03             |                      |                  | 2          | EGA3-1    |
| Folate Transformations I                                   | 1.48E-02             |                      |                  | 2          | EGA3-1    |

a) The p-value: statistical overlap of differentially expressed gene list and gene set

b) Z-score:  $z > 1.96$  to be significantly activated or increased, and those with  $z < -1.96$  to be significantly inhibited
