# Supplementary material
Source: PubMed Central journal article supplement (PMC6417155)
Supplement: gaz001_schall_et_al._table_s16.pdf [file gaz001_schall_et_al._table_s16.pdf]

Table S16 - IPA canonical pathways of the combined EGA1 and EGA2 super-groups

| Canonical Pathways                                     | p-value <sup>a</sup> | Z-score <sup>b</sup> | Activation State | Total DEGs |
|--------------------------------------------------------|----------------------|----------------------|------------------|------------|
| Insulin Receptor Signaling                             | 2.09E-03             | 4                    | Activated        | 18         |
| NGF Signaling                                          | 2.51E-03             | 3.742                | Activated        | 16         |
| Acute Myeloid Leukemia Signaling                       | 4.27E-04             | 3.606                | Activated        | 15         |
| PDGF Signaling                                         | 7.76E-03             | 3.464                | Activated        | 12         |
| Mouse Embryonic Stem Cell Pluripotency                 | 2.57E-02             | 3.464                | Activated        | 12         |
| Glioma Signaling                                       | 4.79E-04             | 3.317                | Activated        | 17         |
| RANK Signaling in Osteoclasts                          | 1.95E-02             | 3.317                | Activated        | 12         |
| NF-κB Activation by Viruses                            | 3.63E-02             | 3.162                | Activated        | 10         |
| Non-Small Cell Lung Cancer Signaling                   | 2.09E-03             | 3.162                | Activated        | 12         |
| Endometrial Cancer Signaling                           | 4.68E-03             | 3.162                | Activated        | 10         |
| ERK5 Signaling                                         | 5.89E-03             | 3.162                | Activated        | 10         |
| ErbB2-ErbB3 Signaling                                  | 8.13E-03             | 3.162                | Activated        | 10         |
| GM-CSF Signaling                                       | 1.20E-02             | 3.162                | Activated        | 10         |
| VEGF Family Ligand-Receptor Interactions               | 3.89E-02             | 3.162                | Activated        | 10         |
| VEGF Signaling                                         | 4.07E-05             | 3.051                | Activated        | 18         |
| IGF-1 Signaling                                        | 6.03E-04             | 3.051                | Activated        | 16         |
| Melanoma Signaling                                     | 5.25E-03             | 3                    | Activated        | 9          |
| mTOR Signaling                                         | 6.31E-22             | 2.982                | Activated        | 55         |
| IL-7 Signaling Pathway                                 | 1.07E-03             | 2.887                | Activated        | 14         |
| Telomerase Signaling                                   | 6.92E-03             | 2.887                | Activated        | 14         |
| Pancreatic Adenocarcinoma Signaling                    | 1.32E-02             | 2.887                | Activated        | 14         |
| SAPK/JNK Signaling                                     | 2.24E-02             | 2.887                | Activated        | 12         |
| IL-2 Signaling                                         | 4.68E-03             | 2.828                | Activated        | 10         |
| Lymphotoxin β Receptor Signaling                       | 1.86E-02             | 2.828                | Activated        | 9          |
| CNTF Signaling                                         | 3.80E-02             | 2.828                | Activated        | 8          |
| Purine Nucleotides De Novo Biosynthesis II             | 7.59E-07             | 2.646                | Activated        | 7          |
| Regulation of eIF4 and p70S6K Signaling                | 6.31E-27             | 2.53                 | Activated        | 54         |
| FLT3 Signaling in Hematopoietic Progenitor Cells       | 3.63E-02             | 2.53                 | Activated        | 10         |
| IL-6 Signaling                                         | 2.24E-02             | 2.496                | Activated        | 14         |
| Estrogen-mediated S-phase Entry                        | 3.89E-03             | 2.449                | Activated        | 6          |
| Growth Hormone Signaling                               | 3.16E-02             | 2.333                | Activated        | 10         |
| Neurotrophin/TRK Signaling                             | 4.17E-02             | 2.333                | Activated        | 9          |
| Cell Cycle: G1/S Checkpoint Regulation                 | 1.86E-02             | -2.333               | Inhibited        | 9          |
| Role of p14/p19ARF in Tumor Suppression                | 4.27E-02             | -2.236               | Inhibited        | 6          |
| AMPK Signaling                                         | 6.17E-04             | 2.065                | Activated        | 26         |
| eNOS Signaling                                         | 3.72E-03             | 2                    | Activated        | 20         |
| Urate Biosynthesis/Inosine 5'-phosphate Degradation    | 6.03E-03             | 2                    | Activated        | 4          |
| Pyrimidine Deoxyribonucleotides De Novo Biosynthesis I | 4.68E-02             | 2                    | Activated        | 4          |
| Purine Nucleotides Degradation II (Aerobic)            | 2.45E-02             | 2                    | Activated        | 4          |
| Methionine Degradation I (to Homocysteine)             | 4.07E-02             | 2                    | Activated        | 4          |
| PEDF Signaling                                         | 3.63E-02             | 1.667                |                  | 10         |
| Huntington's Disease Signaling                         | 5.62E-04             | 1.213                |                  | 29         |

|                                                          |          |       |    |
|----------------------------------------------------------|----------|-------|----|
| Sumoylation Pathway                                      | 2.95E-02 | -1    | 11 |
| Cell Cycle: G2/M DNA Damage Checkpoint Regulation        | 6.92E-04 | 0.707 | 10 |
| Cyclins and Cell Cycle Regulation                        | 9.12E-03 | 0.378 | 11 |
| Systemic Lupus Erythematosus Signaling                   | 4.47E-05 |       | 30 |
| Hereditary Breast Cancer Signaling                       | 1.07E-03 |       | 19 |
| Virus Entry via Endocytic Pathways                       | 9.77E-05 |       | 18 |
| Chronic Myeloid Leukemia Signaling                       | 6.03E-04 |       | 16 |
| Estrogen Receptor Signaling                              | 4.37E-03 |       | 16 |
| Prostate Cancer Signaling                                | 1.38E-02 |       | 12 |
| Erythropoietin Signaling                                 | 9.12E-03 |       | 11 |
| TR/RXR Activation                                        | 3.39E-02 |       | 11 |
| FAK Signaling                                            | 3.63E-02 |       | 11 |
| Ephrin A Signaling                                       | 9.33E-03 |       | 9  |
| Remodeling of Epithelial Adherens Junctions              | 2.24E-02 |       | 9  |
| Docosahexaenoic Acid (DHA) Signaling                     | 1.20E-02 |       | 8  |
| DNA Methylation and Transcriptional Repression Signaling | 3.63E-03 |       | 7  |
| Vitamin-C Transport                                      | 2.24E-04 |       | 6  |
| RAN Signaling                                            | 3.31E-04 |       | 6  |
| Telomere Extension by Telomerase                         | 1.05E-02 |       | 4  |
| DNA damage-induced 14-3-3 $\sigma$ Signaling             | 2.45E-02 |       | 4  |
| 5-aminoimidazole Ribonucleotide Biosynthesis I           | 2.19E-04 |       | 3  |
| Diphthamide Biosynthesis                                 | 1.05E-02 |       | 2  |
| Hypusine Biosynthesis                                    | 1.05E-02 |       | 2  |
| Trehalose Degradation II (Trehalase)                     | 3.24E-02 |       | 2  |
| Polyamine Regulation in Colon Cancer                     | 8.71E-03 |       | 5  |
| Choline Biosynthesis III                                 | 3.98E-02 |       | 3  |

a) The p-value: statistical overlap of differentially expressed gene list and gene set

b) Z-score:  $z > 1.96$  to be significantly activated or increased, and those with  $z < -1.96$  to be significantly inhibited
