# Supplementary material
Source: PubMed Central journal article supplement (PMC6417155)
Supplement: gaz001_schall_et_al._table_s17.pdf [file gaz001_schall_et_al._table_s17.pdf]

Table S17 - IPA biological functions of the combined EGA1-EGA2 super-groups

| Categories                                                                                                                                                                             | Functions Annotation                              | p-value <sup>a</sup> | Z-score <sup>b</sup> | Activation State | Total DEGs |
|----------------------------------------------------------------------------------------------------------------------------------------------------------------------------------------|---------------------------------------------------|----------------------|----------------------|------------------|------------|
| Cell Cycle, DNA Replication, Recombination, and Repair                                                                                                                                 | Homologous recombination of cells                 | 1.17E-06             | 4.123                | Activated        | 17         |
| Gene Expression                                                                                                                                                                        | Repression of RNA                                 | 6.97E-06             | 4.046                | Activated        | 31         |
| Cell Death and Survival                                                                                                                                                                | Cell viability of colorectal cancer cell lines    | 4.94E-05             | 4.04                 | Activated        | 26         |
| Cellular Growth and Proliferation, Embryonic Development                                                                                                                               | Pluripotency of embryonic cell lines              | 1.56E-10             | 3.97                 | Activated        | 17         |
| Cellular Growth and Proliferation                                                                                                                                                      | Pluripotency of cells                             | 1.12E-09             | 3.855                | Activated        | 19         |
| Cellular Growth and Proliferation, Embryonic Development                                                                                                                               | Pluripotency of embryonic stem cell lines         | 4.36E-08             | 3.381                | Activated        | 12         |
| Protein Synthesis                                                                                                                                                                      | Synthesis of protein                              | 4.69E-13             | 3.23                 | Activated        | 65         |
| Cellular Development, Cellular Growth and Proliferation, Embryonic Development, Organismal Development                                                                                 | Proliferation of embryonic stem cells             | 5.81E-04             | 3.138                | Activated        | 10         |
| Cell Morphology, Connective Tissue Development and Function                                                                                                                            | Shape change of fibroblast cell lines             | 2.42E-03             | 3.121                | Activated        | 14         |
| Cellular Development, Embryonic Development, Organismal Development, Tissue Development                                                                                                | Differentiation of embryonic tissue               | 1.95E-03             | 2.61                 | Activated        | 30         |
| Cell Morphology, Cellular Function and Maintenance                                                                                                                                     | Autophagy of tumor cell lines                     | 1.84E-03             | 2.543                | Activated        | 23         |
| Cellular Growth and Proliferation                                                                                                                                                      | Pluripotency of fibroblast cell lines             | 1.48E-04             | 2.406                | Activated        | 6          |
| Cell Cycle                                                                                                                                                                             | G2/M phase                                        | 1.29E-06             | 2.354                | Activated        | 34         |
| Protein Synthesis                                                                                                                                                                      | Translation                                       | 8.39E-10             | 2.267                | Activated        | 32         |
| Cellular Assembly and Organization, Cellular Function and Maintenance                                                                                                                  | Formation of ribosome                             | 9.36E-05             | 2.236                | Activated        | 6          |
| RNA Post-Transcriptional Modification                                                                                                                                                  | Processing of rRNA                                | 2.01E-05             | 2.219                | Activated        | 7          |
| DNA Replication, Recombination, and Repair, Energy Production, Nucleic Acid Metabolism, Small Molecule Biochemistry                                                                    | Hydrolysis of ATP                                 | 2.03E-03             | 2.138                | Activated        | 9          |
| Cellular Growth and Proliferation                                                                                                                                                      | Accumulation of tumor cell lines                  | 3.59E-03             | -2.138               | Inhibited        | 9          |
| Cellular Development, Cellular Growth and Proliferation                                                                                                                                | Cell proliferation of carcinoma cell lines        | 2.56E-04             | 2.118                | Activated        | 57         |
| RNA Post-Transcriptional Modification                                                                                                                                                  | Processing of RNA                                 | 6.50E-04             | 2.058                | Activated        | 13         |
| Molecular Transport, RNA Trafficking                                                                                                                                                   | Export of RNA                                     | 3.97E-04             | 1.982                | Activated        | 7          |
| Cell Cycle                                                                                                                                                                             | Cell cycle progression of connective tissue cells | 4.43E-04             | 1.982                | Activated        | 11         |
| Cell Cycle                                                                                                                                                                             | G1 phase of breast cancer cell lines              | 1.49E-03             | 1.98                 | Activated        | 10         |
| Cell Death and Survival                                                                                                                                                                | Cell death of colorectal cancer cell lines        | 7.41E-04             | -1.93                |                  | 40         |
| Cell-To-Cell Signaling and Interaction, Hair and Skin Development and Function                                                                                                         | Aggregation of epithelial cell lines              | 3.97E-04             | 1.929                |                  | 4          |
| Cell Cycle                                                                                                                                                                             | Cleavage of tumor cell lines                      | 4.27E-06             | 1.89                 |                  | 10         |
| Cell Cycle                                                                                                                                                                             | G1 phase of tumor cell lines                      | 4.94E-05             | 1.869                |                  | 36         |
| Cell Death and Survival, Renal and Urological System Development and Function                                                                                                          | Cell viability of kidney cell lines               | 8.50E-04             | 1.863                |                  | 14         |
| Protein Synthesis                                                                                                                                                                      | Translation of protein                            | 1.43E-07             | 1.7                  |                  | 27         |
| Cell Cycle                                                                                                                                                                             | G2/M phase of tumor cell lines                    | 7.39E-04             | 1.698                |                  | 16         |
| Cell Death and Survival, Cellular Development, Cellular Function and Maintenance, Cellular Growth and Proliferation, Embryonic Development, Organismal Development, Tissue Development | Self-renewal of neural stem cells                 | 3.12E-03             | 1.673                |                  | 6          |
| Cellular Development                                                                                                                                                                   | Differentiation of embryonic cancer cell lines    | 2.49E-03             | 1.673                |                  | 6          |
| Molecular Transport, Protein Trafficking                                                                                                                                               | Internalization of protein                        | 2.74E-03             | 1.664                |                  | 8          |
| Cell Death and Survival                                                                                                                                                                | Cell death of melanoma cell lines                 | 1.75E-05             | -1.497               |                  | 39         |

|                                                                                 |                                                             |          |        |    |
|---------------------------------------------------------------------------------|-------------------------------------------------------------|----------|--------|----|
| Cell Death and Survival, Embryonic Development                                  | Cell viability of embryonic cell lines                      | 5.05E-04 | 1.478  | 18 |
| Cell Death and Survival                                                         | Cell viability of gastrointestinal stromal tumor cell lines | 3.50E-03 | 1.432  | 5  |
| Cell Death and Survival, Hair and Skin Development and Function                 | Cell viability of epithelial cell lines                     | 1.47E-03 | 1.401  | 16 |
| Cell Cycle                                                                      | Cell division of tumor cell lines                           | 7.09E-06 | 1.342  | 8  |
| Cell Death and Survival                                                         | Apoptosis of carcinoma cell lines                           | 1.13E-04 | -1.204 | 42 |
| Cellular Assembly and Organization                                              | Fusion of mitochondria                                      | 1.00E-03 | 1.165  | 5  |
| Cell Morphology, Cellular Function and Maintenance                              | Mitochondrial membrane potential                            | 3.08E-03 | -1.153 | 4  |
| Cellular Assembly and Organization, DNA Replication, Recombination, and Repair  | Stabilization of chromosomes                                | 3.12E-03 | 1.133  | 6  |
| Cell-To-Cell Signaling and Interaction                                          | Aggregation of carcinoma cell lines                         | 3.08E-03 | 1.07   | 4  |
| Cell Death and Survival, Organismal Survival                                    | Survival of yeast                                           | 2.66E-03 | 1.067  | 5  |
| Cell Death and Survival                                                         | Cell death of megakaryocytes                                | 2.06E-03 | 0.988  | 4  |
| Cell Cycle                                                                      | Initiation of S phase                                       | 2.53E-03 | 0.913  | 7  |
| Cell Death and Survival                                                         | Cell death of central nervous system cells                  | 3.10E-03 | 0.837  | 37 |
| Cellular Development, Cellular Growth and Proliferation                         | Proliferation of lung cancer cell lines                     | 1.43E-06 | 0.831  | 46 |
| Cell Cycle                                                                      | Interphase of fibroblast cell lines                         | 4.65E-05 | 0.786  | 22 |
| Gene Expression, RNA Post-Transcriptional Modification                          | Binding of RNA                                              | 3.05E-03 | 0.728  | 7  |
| Cell Death and Survival                                                         | Cell death of sarcoma cell lines                            | 4.18E-04 | -0.63  | 33 |
| Cell Cycle, Connective Tissue Development and Function                          | Mitosis of fibroblast cell lines                            | 3.87E-04 | 0.626  | 8  |
| Cellular Compromise                                                             | Degradation of mitochondria                                 | 3.59E-03 | 0.624  | 9  |
| Cell Cycle, Connective Tissue Development and Function                          | Entry into S phase of fibroblast cell lines                 | 3.12E-03 | 0.555  | 6  |
| Cell Cycle                                                                      | G2 phase of tumor cell lines                                | 1.82E-04 | 0.513  | 24 |
| Cell Cycle                                                                      | Interphase of colorectal cancer cell lines                  | 1.63E-03 | 0.391  | 14 |
| Cell Cycle, Connective Tissue Development and Function                          | G1 phase of fibroblast cell lines                           | 4.13E-04 | 0.378  | 14 |
| Cell Death and Survival                                                         | Cell death of bone cancer cell lines                        | 1.36E-03 | 0.366  | 26 |
| Cell Death and Survival                                                         | Cell death of stem cells                                    | 1.15E-03 | -0.332 | 15 |
| Cell Cycle                                                                      | Aneuploidy of embryonic cell lines                          | 7.56E-04 | 0.254  | 4  |
| Cellular Movement                                                               | Invasion of stomach cancer cell lines                       | 1.57E-04 | -0.2   | 7  |
| Cellular Compromise                                                             | Dysfunction of mitochondria                                 | 8.18E-04 | 0.154  | 11 |
| Cellular Assembly and Organization, DNA Replication, Recombination, and Repair  | Amplification of centrosome                                 | 1.29E-03 | 0      | 10 |
| Cell Cycle, Renal and Urological System Development and Function                | Initiation of S phase of kidney cell lines                  | 3.63E-03 |        | 2  |
| Cell Death and Survival                                                         | Cell death of spleen-derived dendritic cells                | 3.63E-03 |        | 2  |
| Cell Cycle                                                                      | Delay in cell cycle progression                             | 1.96E-03 |        | 8  |
| Cellular Growth and Proliferation, Reproductive System Development and Function | Cytostasis of gonadal cell lines                            | 3.63E-03 |        | 2  |
| Cellular Assembly and Organization, Cellular Function and Maintenance           | Elongation of Nucleus                                       | 3.63E-03 |        | 2  |
| Amino Acid Metabolism, Small Molecule Biochemistry                              | Catabolism of glutamine                                     | 3.63E-03 |        | 2  |
| Cell Cycle                                                                      | Arrest in G1 phase                                          | 3.39E-03 |        | 34 |
| Cell Cycle                                                                      | Arrest in G1 phase of tumor cell lines                      | 1.54E-03 |        | 25 |
| Cell Cycle, Connective Tissue Development and Function                          | Cell cycle progression of fibroblasts                       | 4.89E-04 |        | 10 |
| Carbohydrate Metabolism, Molecular Transport                                    | Transport of monocarboxylic acid                            | 4.38E-04 |        | 5  |

|                                                                                                                                                                                                               |                                                          |          |    |
|---------------------------------------------------------------------------------------------------------------------------------------------------------------------------------------------------------------|----------------------------------------------------------|----------|----|
| Cell Cycle                                                                                                                                                                                                    | Arrest in interphase of tumor cell lines                 | 8.39E-05 | 42 |
| Cell-To-Cell Signaling and Interaction                                                                                                                                                                        | Aggregation of skin cell lines                           | 8.35E-04 | 3  |
| Cell Cycle                                                                                                                                                                                                    | Cell cycle progression of bone cancer cell lines         | 2.74E-03 | 8  |
| Cell Cycle                                                                                                                                                                                                    | G2/M phase of colorectal cancer cell lines               | 1.00E-03 | 5  |
| Cell-To-Cell Signaling and Interaction, Connective Tissue Development and Function                                                                                                                            | Reactivation of fibroblasts                              | 3.63E-03 | 2  |
| Cell Morphology, Hair and Skin Development and Function                                                                                                                                                       | Morphology of epithelial cell lines                      | 1.84E-03 | 11 |
| Cell Cycle                                                                                                                                                                                                    | Arrest in G2/M phase transition of tumor cell lines      | 3.05E-03 | 7  |
| Cell Cycle                                                                                                                                                                                                    | Arrest in cell division of tumor cell lines              | 3.63E-03 | 2  |
| Cell Cycle                                                                                                                                                                                                    | Arrest in G2 phase                                       | 1.02E-05 | 31 |
| Lipid Metabolism, Small Molecule Biochemistry                                                                                                                                                                 | Production of C18-ceramide                               | 8.35E-04 | 3  |
| Cell Cycle                                                                                                                                                                                                    | Arrest in G2/M phase of tumor cell lines                 | 2.93E-03 | 12 |
| Cell Cycle, Connective Tissue Development and Function                                                                                                                                                        | Delay in cell cycle progression of fibroblast cell lines | 1.79E-04 | 4  |
| Cell Cycle                                                                                                                                                                                                    | Arrest in G2/M phase                                     | 6.00E-05 | 18 |
| Cellular Assembly and Organization                                                                                                                                                                            | Quantity of ribosome                                     | 1.99E-03 | 3  |
| Cellular Development, Cellular Growth and Proliferation, Connective Tissue Development and Function                                                                                                           | Arrest in proliferation of fibroblast cell lines         | 1.49E-03 | 9  |
| Cellular Response to Therapeutics                                                                                                                                                                             | Radioresistance of hepatoma cell lines                   | 3.63E-03 | 2  |
| Cell Death and Survival                                                                                                                                                                                       | Killing of bone marrow-derived dendritic cells           | 3.63E-03 | 2  |
| Protein Synthesis                                                                                                                                                                                             | Elongation of protein                                    | 8.35E-04 | 3  |
| Cell Cycle, Gene Expression                                                                                                                                                                                   | Binding of KIF5 binding site                             | 2.19E-04 | 3  |
| Cell Cycle, Skeletal and Muscular System Development and Function                                                                                                                                             | Arrest in cell cycle progression of muscle cells         | 1.30E-03 | 4  |
| Cellular Assembly and Organization                                                                                                                                                                            | Binding of ribosome                                      | 2.06E-03 | 4  |
| Cellular Compromise                                                                                                                                                                                           | Disorganization of actin                                 | 3.63E-03 | 2  |
| Cell Cycle                                                                                                                                                                                                    | Arrest in interphase                                     | 3.77E-06 | 65 |
| Gene Expression                                                                                                                                                                                               | Synthesis of 47s pre-rRNA                                | 2.19E-04 | 3  |
| Cellular Compromise                                                                                                                                                                                           | Injury of mitochondrial membrane                         | 3.63E-03 | 2  |
| DNA Replication, Recombination, and Repair, RNA Post-Transcriptional Modification                                                                                                                             | Annealing of hnRNA                                       | 2.19E-04 | 3  |
| Cellular Development, Cellular Growth and Proliferation, Connective Tissue Development and Function, Hematological System Development and Function, Hematopoiesis, Organismal Development, Tissue Development | Differentiation of reticulocytes                         | 3.63E-03 | 2  |
| Cell Cycle                                                                                                                                                                                                    | Arrest in G2/M phase transition                          | 2.57E-03 | 10 |
| Cellular Assembly and Organization, Cellular Function and Maintenance                                                                                                                                         | Formation of monosome                                    | 3.63E-03 | 2  |
| Cell Cycle                                                                                                                                                                                                    | Arrest in G2 phase of endothelial cell lines             | 3.63E-03 | 2  |
| Cellular Assembly and Organization                                                                                                                                                                            | Regulation of mitochondria                               | 1.35E-04 | 8  |
| Cell Cycle                                                                                                                                                                                                    | Arrest in G2 phase of tumor cell lines                   | 1.50E-03 | 18 |
| Cell Cycle                                                                                                                                                                                                    | Cell division of cervical cancer cell lines              | 1.30E-03 | 4  |
| Cell Morphology                                                                                                                                                                                               | Polarization of bone marrow-derived mast cells           | 3.63E-03 | 2  |
| Cellular Response to Therapeutics                                                                                                                                                                             | Radioresistance of cervical cancer cell lines            | 3.63E-03 | 2  |
| Cell Morphology                                                                                                                                                                                               | Size of colorectal cancer cell lines                     | 3.63E-03 | 2  |
| Carbohydrate Metabolism                                                                                                                                                                                       | Production of glyceraldehyde-3-phosphate                 | 3.63E-03 | 2  |
| Molecular Transport, Protein Trafficking                                                                                                                                                                      | Import of green fluorescent protein                      | 8.35E-04 | 3  |
| Nucleic Acid Metabolism, Small Molecule Biochemistry                                                                                                                                                          | Synthesis of ribonucleoside monophosphate                | 8.35E-04 | 3  |
| Cell Cycle                                                                                                                                                                                                    | Delay in mitosis                                         | 2.19E-04 | 9  |

|                                                                                                                                         |                                                                                                         |          |           |    |
|-----------------------------------------------------------------------------------------------------------------------------------------|---------------------------------------------------------------------------------------------------------|----------|-----------|----|
| Connective Tissue Development and Function,<br>Skeletal and Muscular System Development and<br>Function, Tissue Development             | Spacing of trabecular bone                                                                              | 3.63E-03 |           | 2  |
| Cell Cycle                                                                                                                              | Exit from G1 phase                                                                                      | 6.71E-06 |           | 7  |
| Carbohydrate Metabolism, Small Molecule<br>Biochemistry                                                                                 | Catabolism of D-glucose                                                                                 | 3.63E-03 |           | 2  |
| Digestive System Development and Function,<br>Organ Morphology, Tissue Morphology                                                       | Quantity of M cells                                                                                     | 3.63E-03 |           | 2  |
| DNA Replication, Recombination, and Repair,<br>Molecular Transport                                                                      | Depletion of mitochondrial DNA                                                                          | 1.30E-03 |           | 4  |
| Carbohydrate Metabolism, Molecular Transport                                                                                            | Transport of dehydroascorbic acid                                                                       | 2.19E-04 |           | 3  |
| Cell Cycle, Gene Expression                                                                                                             | Binding of AP2 binding site                                                                             | 3.63E-03 |           | 2  |
| Embryonic Development, Organ Development,<br>Organismal Development, Respiratory System<br>Development and Function, Tissue Development | Organogenesis of pulmonary alveolus                                                                     | 3.63E-03 |           | 2  |
| Quantity of tumor cell lines                                                                                                            | Tissue Morphology                                                                                       | 1.35E-03 | Activated | 25 |
| Colony formation of fibroblast cell lines                                                                                               | Cellular Growth and Proliferation, Connective<br>Tissue Development and Function, Tissue<br>Development | 5.39E-04 | Activated | 16 |
| Proliferation of airway epithelial cells                                                                                                | Cellular Growth and Proliferation, Tissue<br>Development                                                | 1.00E-03 |           | 5  |
| Arrest in G2/M phase transition of lung cancer<br>cell lines                                                                            | Cell Cycle                                                                                              | 1.99E-03 |           | 3  |
| G2/M phase of embryonic cell lines                                                                                                      | Cell Cycle, Embryonic Development                                                                       | 1.43E-03 |           | 5  |
| Cell cycle progression of cervical cancer cell lines                                                                                    | Cell Cycle                                                                                              | 2.74E-03 |           | 8  |
| Interphase of lung cell lines                                                                                                           | Cell Cycle                                                                                              | 1.17E-03 |           | 6  |

a) The p-value: statistical overlap of differentially expressed gene list and gene set

b) Z-score:  $z > 1.96$  to be significantly activated or increased, and those with  $z < -1.96$  to be significantly inhibited
