# Supplementary material
Source: PubMed Central journal article supplement (PMC6417155)
Supplement: gaz001_schall_et_al._table_s18.pdf [file gaz001_schall_et_al._table_s18.pdf]

Table S18 - IPA canonical pathways unique to EGA4 super-group

| Canonical Pathways                                                        | p-value <sup>a</sup> | Z-score <sup>b</sup> | Activation State | Total DEGs | Sub-Group |
|---------------------------------------------------------------------------|----------------------|----------------------|------------------|------------|-----------|
| Osteoarthritis Pathway                                                    | 3.55E-05             | 1.667                |                  | 10         | EGA4-1    |
| Role of Osteoblasts, Osteoclasts and Chondrocytes in Rheumatoid Arthritis | 3.89E-04             |                      |                  | 9          | EGA4-1    |
| Colorectal Cancer Metastasis Signaling                                    | 9.55E-03             | 2.646                | Activated        | 7          | EGA4-1    |
| Hepatic Fibrosis / Hepatic Stellate Cell Activation                       | 8.91E-03             |                      |                  | 6          | EGA4-1    |
| Basal Cell Carcinoma Signaling                                            | 6.03E-04             | 2                    | Activated        | 5          | EGA4-1    |
| LXR/RXR Activation                                                        | 5.89E-03             | 0                    |                  | 5          | EGA4-1    |
| Atherosclerosis Signaling                                                 | 7.24E-03             |                      |                  | 5          | EGA4-1    |
| PCP pathway                                                               | 2.69E-03             | 2                    | Activated        | 4          | EGA4-1    |
| Hepatic Fibrosis / Hepatic Stellate Cell Activation                       | 2.29E-02             |                      |                  | 4          | EGA4-2    |
| Role of Wnt/GSK-3 $\beta$ Signaling in the Pathogenesis of Influenza      | 6.17E-03             |                      |                  | 4          | EGA4-1    |
| Superpathway of Cholesterol Biosynthesis                                  | 2.29E-03             |                      |                  | 3          | EGA4-1    |
| Histamine Degradation                                                     | 5.25E-03             |                      |                  | 2          | EGA4-2    |
| Oxidative Ethanol Degradation III                                         | 6.46E-03             |                      |                  | 2          | EGA4-2    |
| Fatty Acid $\alpha$ -oxidation                                            | 7.08E-03             |                      |                  | 2          | EGA4-2    |
| Putrescine Degradation III                                                | 7.76E-03             |                      |                  | 2          | EGA4-2    |
| Tryptophan Degradation X (Mammalian, via Tryptamine)                      | 9.12E-03             |                      |                  | 2          | EGA4-2    |
| Ethanol Degradation IV                                                    | 9.12E-03             |                      |                  | 2          | EGA4-2    |
| Dopamine Degradation                                                      | 1.91E-02             |                      |                  | 2          | EGA4-2    |
| Ethanol Degradation II                                                    | 1.91E-02             |                      |                  | 2          | EGA4-2    |
| Noradrenaline and Adrenaline Degradation                                  | 2.24E-02             |                      |                  | 2          | EGA4-2    |
| Zymosterol Biosynthesis                                                   | 1.29E-03             |                      |                  | 2          | EGA4-1    |
| Cholesterol Biosynthesis I                                                | 6.46E-03             |                      |                  | 2          | EGA4-1    |
| Cholesterol Biosynthesis II (via 24,25-dihydrostanosterol)                | 6.46E-03             |                      |                  | 2          | EGA4-1    |
| Cholesterol Biosynthesis III (via Desmosterol)                            | 6.46E-03             |                      |                  | 2          | EGA4-1    |
| Chondroitin Sulfate Degradation (Metazoa)                                 | 9.77E-03             |                      |                  | 2          | EGA4-1    |
| Dermatan Sulfate Degradation (Metazoa)                                    | 1.10E-02             |                      |                  | 2          | EGA4-1    |
| Role of JAK1, JAK2 and TYK2 in Interferon Signaling                       | 2.14E-02             |                      |                  | 2          | EGA4-1    |
| IL-15 Production                                                          | 2.88E-02             |                      |                  | 2          | EGA4-1    |

a) The p-value: statistical overlap of differentially expressed gene list and gene set

b) Z-score:  $z > 1.96$  to be significantly activated or increased, and those with  $z < -1.96$  to be significantly inhibited
