# Supplementary material
Source: PubMed Central journal article supplement (PMC6417155)
Supplement: gaz001_schall_et_al._table_s19.pdf [file gaz001_schall_et_al._table_s19.pdf]

Table S19 - IPA biological functions unique to EGA4 super-group

| Categories                                                                                                            | Functions Annotation                 | p-value <sup>a</sup> | Z-score <sup>b</sup> | Activation State | Total DEGs | Sub-Group |
|-----------------------------------------------------------------------------------------------------------------------|--------------------------------------|----------------------|----------------------|------------------|------------|-----------|
| Cellular Movement                                                                                                     | Cell movement of blood cells         | 1.97E-04             | 1.856                |                  | 25         | EGA4-1    |
| Cellular Movement, Hematological System Development and Function, Immune Cell Trafficking                             | Cell movement of leukocytes          | 4.54E-04             | 1.87                 |                  | 22         | EGA4-1    |
| Cell-To-Cell Signaling and Interaction, Hematological System Development and Function                                 | Activation of blood cells            | 6.80E-03             | 2.93                 | Activated        | 16         | EGA4-1    |
| Lipid Metabolism, Small Molecule Biochemistry                                                                         | Fatty acid metabolism                | 1.66E-04             | 2.681                | Activated        | 16         | EGA4-1    |
| Cellular Movement                                                                                                     | Cell movement of myeloid cells       | 1.23E-03             | 1.202                |                  | 16         | EGA4-1    |
| Cellular Movement                                                                                                     | Cellular infiltration                | 3.05E-04             | 1.05                 |                  | 16         | EGA4-1    |
| Lymphoid Tissue Structure and Development, Tissue Morphology                                                          | Quantity of lymphatic system cells   | 4.47E-03             | 1.343                |                  | 15         | EGA4-1    |
| Hematological System Development and Function, Tissue Morphology                                                      | Quantity of mononuclear leukocytes   | 3.21E-03             | 1.17                 |                  | 15         | EGA4-1    |
| Cellular Movement                                                                                                     | Cellular infiltration by blood cells | 2.14E-04             | 1.116                |                  | 15         | EGA4-1    |
| Hematological System Development and Function, Lymphoid Tissue Structure and Development, Tissue Morphology           | Quantity of lymphocytes              | 5.32E-03             | 1.628                |                  | 14         | EGA4-1    |
| Cellular Movement, Hematological System Development and Function, Immune Cell Trafficking                             | Cellular infiltration by leukocytes  | 5.93E-04             | 1.446                |                  | 14         | EGA4-1    |
| Cell-To-Cell Signaling and Interaction, Cellular Growth and Proliferation                                             | Stimulation of cells                 | 2.18E-04             | 2.316                | Activated        | 12         | EGA4-1    |
| Skeletal and Muscular System Development and Function                                                                 | Morphology of muscle                 | 2.46E-04             |                      |                  | 12         | EGA4-1    |
| Carbohydrate Metabolism                                                                                               | Metabolism of carbohydrate           | 7.40E-03             | 3.095                | Activated        | 11         | EGA4-1    |
| Connective Tissue Development and Function, Skeletal and Muscular System Development and Function, Tissue Development | Morphology of bone                   | 1.51E-04             |                      |                  | 11         | EGA4-1    |
| Cell Morphology, Nervous System Development and Function, Tissue Morphology                                           | Morphology of neurons                | 4.33E-03             |                      |                  | 11         | EGA4-1    |
| Carbohydrate Metabolism                                                                                               | Synthesis of carbohydrate            | 6.56E-03             | 3.089                | Activated        | 10         | EGA4-1    |
| Cell-To-Cell Signaling and Interaction, Hematological System Development and Function                                 | Activation of myeloid cells          | 4.07E-03             | 2.34                 | Activated        | 10         | EGA4-1    |
| Molecular Transport                                                                                                   | Release of metal                     | 1.20E-04             | 2.002                | Activated        | 10         | EGA4-1    |
| Cardiovascular System Development and Function, Cellular Movement                                                     | Cell movement of endothelial cells   | 6.89E-03             | 1.704                |                  | 10         | EGA4-1    |
| Cell Morphology, Organ Morphology, Skeletal and Muscular System Development and Function, Tissue Morphology           | Morphology of muscle cells           | 9.62E-04             |                      |                  | 10         | EGA4-1    |
| Cardiovascular System Development and Function, Cellular Movement                                                     | Cell movement of endothelial cells   | 1.62E-04             |                      |                  | 10         | EGA4-2    |
| Connective Tissue Development and Function, Tissue Morphology                                                         | Quantity of connective tissue cells  | 1.64E-04             | 1.554                |                  | 9          | EGA4-1    |
| Hematological System Development and Function, Tissue Morphology                                                      | Quantity of antigen presenting cells | 1.79E-03             | -0.513               |                  | 9          | EGA4-1    |
| Post-Translational Modification                                                                                       | Phosphorylation of protein           | 5.00E-03             | 1.474                |                  | 8          | EGA4-1    |
| Cellular Movement                                                                                                     | Chemotaxis of myeloid cells          | 2.57E-03             | 1.302                |                  | 8          | EGA4-1    |
| Cardiovascular System Development and Function, Cell-To-Cell Signaling and Interaction                                | Binding of endothelial cells         | 1.94E-03             | 0.7                  |                  | 8          | EGA4-1    |
| Connective Tissue Development and Function, Skeletal and Muscular System Development and Function, Tissue Development | Size of bone                         | 9.58E-04             |                      |                  | 8          | EGA4-1    |
| Connective Tissue Development and Function, Skeletal and Muscular System Development and Function, Tissue Morphology  | Quantity of bone cells               | 1.72E-04             | 1.969                | Activated        | 7          | EGA4-1    |
| Lipid Metabolism, Molecular Transport, Small Molecule Biochemistry                                                    | Quantity of glycosphingolipid        | 1.13E-04             | 1.284                |                  | 7          | EGA4-1    |
| Cell Signaling, Post-Translational Modification                                                                       | Tyrosine phosphorylation of protein  | 4.95E-03             | 1.214                |                  | 7          | EGA4-1    |
| Cellular Assembly and Organization                                                                                    | Quantity of filaments                | 7.27E-04             | -1.085               |                  | 7          | EGA4-1    |

|                                                                                                                                                                                                                                                             |                                                 |          |        |           |   |        |
|-------------------------------------------------------------------------------------------------------------------------------------------------------------------------------------------------------------------------------------------------------------|-------------------------------------------------|----------|--------|-----------|---|--------|
| Carbohydrate Metabolism                                                                                                                                                                                                                                     | Accumulation of carbohydrate                    | 1.20E-03 | -0.789 |           | 7 | EGA4-1 |
| Molecular Transport                                                                                                                                                                                                                                         | Transport of metal                              | 1.62E-03 | 0.625  |           | 7 | EGA4-1 |
| Cellular Movement, Hair and Skin Development and Function                                                                                                                                                                                                   | Cell movement of epithelial cell lines          | 9.40E-04 | 0.625  |           | 7 | EGA4-1 |
| Cellular Movement, Hematological System Development and Function, Immune Cell Trafficking                                                                                                                                                                   | Cellular infiltration by lymphocytes            | 2.20E-03 | 0.258  |           | 7 | EGA4-1 |
| Cell-To-Cell Signaling and Interaction                                                                                                                                                                                                                      | Signaling of cells                              | 4.51E-04 | 0.115  |           | 7 | EGA4-1 |
| Lipid Metabolism, Small Molecule Biochemistry, Vitamin and Mineral Metabolism                                                                                                                                                                               | Steroid metabolism                              | 1.62E-03 | 0.099  |           | 7 | EGA4-1 |
| Organ Morphology                                                                                                                                                                                                                                            | Morphology of gland                             | 3.01E-03 |        |           | 7 | EGA4-1 |
| Cell Morphology                                                                                                                                                                                                                                             | Morphology of cellular protrusions              | 5.58E-03 |        |           | 7 | EGA4-1 |
| Cellular Development                                                                                                                                                                                                                                        | Differentiation of central nervous system cells | 7.27E-04 | 2.414  | Activated | 6 | EGA4-1 |
| Cellular Movement                                                                                                                                                                                                                                           | Cell movement of hepatoma cell lines            | 8.34E-04 | 2.375  | Activated | 6 | EGA4-1 |
| Cellular Assembly and Organization, Cellular Function and Maintenance, Nervous System Development and Function, Tissue Morphology                                                                                                                           | Quantity of neurites                            | 2.42E-04 | 2.207  | Activated | 6 | EGA4-1 |
| Cell Morphology, Cellular Assembly and Organization, Cellular Development, Cellular Function and Maintenance, Cellular Growth and Proliferation, Nervous System Development and Function, Organismal Development, Tissue Development                        | Axonogenesis                                    | 3.63E-03 | 1.861  |           | 6 | EGA4-1 |
| Cell Death and Survival                                                                                                                                                                                                                                     | Cell viability of central nervous system cells  | 1.89E-03 | 1.455  |           | 6 | EGA4-1 |
| Molecular Transport                                                                                                                                                                                                                                         | Transport of ion                                | 3.09E-03 | 1.452  |           | 6 | EGA4-1 |
| Embryonic Development, Organismal Development, Skeletal and Muscular System Development and Function                                                                                                                                                        | Limb development                                | 4.92E-03 | 1.214  |           | 6 | EGA4-1 |
| Cell Death and Survival                                                                                                                                                                                                                                     | Cell viability of connective tissue cells       | 4.11E-03 | 1.185  |           | 6 | EGA4-1 |
| Cellular Movement                                                                                                                                                                                                                                           | Migration of prostate cancer cell lines         | 1.39E-03 | 1.165  |           | 6 | EGA4-1 |
| Cell Death and Survival                                                                                                                                                                                                                                     | Cell death of eye cells                         | 1.20E-04 | 0.97   |           | 6 | EGA4-1 |
| Cellular Growth and Proliferation, Nervous System Development and Function, Organ Development                                                                                                                                                               | Proliferation of brain cells                    | 1.28E-04 | -0.006 |           | 6 | EGA4-1 |
| Cardiovascular System Development and Function                                                                                                                                                                                                              | Morphology of vessel                            | 1.45E-03 |        |           | 6 | EGA4-1 |
| Cell Morphology                                                                                                                                                                                                                                             | Polarization of cells                           | 1.91E-03 |        |           | 6 | EGA4-2 |
| Hematological System Development and Function, Lymphoid Tissue Structure and Development, Tissue Morphology                                                                                                                                                 | Quantity of lymphocytes                         | 8.93E-03 |        | Inhibited | 6 | EGA4-3 |
| Connective Tissue Development and Function, Tissue Morphology                                                                                                                                                                                               | Quantity of connective tissue cells             | 1.79E-05 |        |           | 6 | EGA4-3 |
| Cellular Movement, Hematological System Development and Function, Immune Cell Trafficking                                                                                                                                                                   | Cell movement of granulocytes                   | 1.34E-03 |        |           | 6 | EGA4-3 |
| Carbohydrate Metabolism, Small Molecule Biochemistry                                                                                                                                                                                                        | Synthesis of D-glucose                          | 2.20E-03 | 2.219  | Activated | 5 | EGA4-1 |
| Molecular Transport                                                                                                                                                                                                                                         | Transport of carboxylic acid                    | 1.82E-03 | 2.219  | Activated | 5 | EGA4-1 |
| Cellular Development                                                                                                                                                                                                                                        | Differentiation of brain cells                  | 5.66E-04 | 2.132  | Activated | 5 | EGA4-1 |
| Cell Morphology, Cellular Assembly and Organization, Cellular Development, Cellular Function and Maintenance, Cellular Growth and Proliferation, Embryonic Development, Nervous System Development and Function, Organismal Development, Tissue Development | Branching of axons                              | 1.82E-03 | 1.871  |           | 5 | EGA4-1 |
| Molecular Transport                                                                                                                                                                                                                                         | Transport of cation                             | 3.66E-03 | 1.387  |           | 5 | EGA4-1 |
| Lipid Metabolism, Molecular Transport, Small Molecule Biochemistry                                                                                                                                                                                          | Quantity of glycosylceramide                    | 1.67E-06 | 1.342  |           | 5 | EGA4-1 |
| Cell-To-Cell Signaling and Interaction, Connective Tissue Development and Function                                                                                                                                                                          | Binding of fibroblast cell lines                | 5.33E-03 | 1.154  |           | 5 | EGA4-1 |
| Cell Death and Survival                                                                                                                                                                                                                                     | Cell viability of brain cells                   | 4.44E-03 | 1.126  |           | 5 | EGA4-1 |
| Cellular Assembly and Organization                                                                                                                                                                                                                          | Quantity of actin filaments                     | 1.03E-03 | -1.067 |           | 5 | EGA4-1 |
| Free Radical Scavenging, Small Molecule Biochemistry                                                                                                                                                                                                        | Metabolism of hydrogen peroxide                 | 5.33E-03 | 1.021  |           | 5 | EGA4-1 |

|                                                                                                                                                                                                      |                                              |          |        |           |   |        |
|------------------------------------------------------------------------------------------------------------------------------------------------------------------------------------------------------|----------------------------------------------|----------|--------|-----------|---|--------|
| Skeletal and Muscular System Development and Function                                                                                                                                                | Quantity of muscle                           | 4.96E-03 | 0.817  |           | 5 | EGA4-1 |
| Carbohydrate Metabolism                                                                                                                                                                              | Accumulation of polysaccharide               | 2.39E-04 | -0.669 |           | 5 | EGA4-1 |
| Cell Death and Survival                                                                                                                                                                              | Cell death of retinal cells                  | 5.66E-04 | 0.651  |           | 5 | EGA4-1 |
| Cellular Growth and Proliferation                                                                                                                                                                    | Colony formation of breast cancer cell lines | 2.41E-03 | 0.447  |           | 5 | EGA4-1 |
| Nervous System Development and Function, Organ Morphology, Tissue Morphology                                                                                                                         | Quantity of brain cells                      | 1.28E-03 | 0.44   |           | 5 | EGA4-1 |
| Cell Death and Survival                                                                                                                                                                              | Apoptosis of pheochromocytoma cell lines     | 1.91E-03 | -0.407 |           | 5 | EGA4-1 |
| Cardiovascular System Development and Function, Tissue Morphology                                                                                                                                    | Morphology of blood vessel                   | 3.66E-03 |        |           | 5 | EGA4-1 |
| Digestive System Development and Function, Organ Morphology, Organismal Development                                                                                                                  | Morphology of pancreas                       | 6.85E-04 |        |           | 5 | EGA4-1 |
| Cell Morphology                                                                                                                                                                                      | Area of cells                                | 1.15E-03 |        |           | 5 | EGA4-1 |
| Cellular Movement                                                                                                                                                                                    | Migration of prostate cancer cell lines      | 8.79E-04 |        |           | 5 | EGA4-2 |
| Cellular Movement                                                                                                                                                                                    | Cell movement of sarcoma cell lines          | 6.32E-04 |        | Inhibited | 5 | EGA4-2 |
| Cardiovascular System Development and Function, Cellular Movement                                                                                                                                    | Migration of vascular endothelial cells      | 7.00E-03 |        | Inhibited | 5 | EGA4-2 |
| Cellular Movement                                                                                                                                                                                    | Chemotaxis of tumor cell lines               | 2.98E-03 |        | Inhibited | 5 | EGA4-2 |
| Cell Morphology, Cellular Assembly and Organization, Cellular Function and Maintenance                                                                                                               | Extension of cellular protrusions            | 3.72E-03 |        |           | 5 | EGA4-2 |
| Cellular Development, Cellular Growth and Proliferation, Embryonic Development, Organ Development, Organismal Development, Skeletal and Muscular System Development and Function, Tissue Development | Formation of muscle cells                    | 1.40E-03 |        |           | 5 | EGA4-2 |
| Connective Tissue Development and Function, Skeletal and Muscular System Development and Function, Tissue Morphology                                                                                 | Quantity of bone cells                       | 1.87E-05 |        |           | 5 | EGA4-3 |
| Cell-To-Cell Signaling and Interaction, Cellular Movement                                                                                                                                            | Recruitment of cells                         | 6.62E-03 |        | Inhibited | 5 | EGA4-3 |
| Cardiovascular System Development and Function, Organismal Development, Tissue Morphology                                                                                                            | Quantity of blood vessel                     | 6.15E-03 | 1.982  | Activated | 4 | EGA4-1 |
| Cellular Development, Cellular Growth and Proliferation, Connective Tissue Development and Function, Tissue Development                                                                              | Proliferation of chondrocytes                | 7.66E-03 | 1.955  |           | 4 | EGA4-1 |
| Embryonic Development, Organismal Development, Skeletal and Muscular System Development and Function                                                                                                 | Growth of limb                               | 2.27E-04 | 1.192  |           | 4 | EGA4-1 |
| Cellular Assembly and Organization                                                                                                                                                                   | Fusion of vesicles                           | 2.83E-03 | 1.188  |           | 4 | EGA4-1 |
| Cellular Development, Nervous System Development and Function                                                                                                                                        | Differentiation of oligodendrocytes          | 5.09E-03 | 1.154  |           | 4 | EGA4-1 |
| Cellular Assembly and Organization, Cellular Function and Maintenance, Organ Morphology, Skeletal and Muscular System Development and Function, Tissue Morphology                                    | Quantity of smooth muscle cells              | 7.85E-04 | 1.131  |           | 4 | EGA4-1 |
| Cellular Function and Maintenance, Small Molecule Biochemistry                                                                                                                                       | Homeostasis of ion                           | 4.16E-03 | 1.067  |           | 4 | EGA4-1 |
| Lipid Metabolism, Molecular Transport, Small Molecule Biochemistry                                                                                                                                   | Accumulation of glycosphingolipid            | 4.02E-04 | -0.961 |           | 4 | EGA4-1 |
| Hematological System Development and Function, Lymphoid Tissue Structure and Development, Tissue Morphology                                                                                          | Quantity of CD4+ T-lymphocytes               | 1.70E-03 | -0.943 |           | 4 | EGA4-1 |
| Lipid Metabolism, Molecular Transport, Small Molecule Biochemistry                                                                                                                                   | Quantity of cerebroside                      | 9.79E-06 | 0.832  |           | 4 | EGA4-1 |
| Cell Death and Survival                                                                                                                                                                              | Apoptosis of bone marrow cell lines          | 4.16E-03 | 0.762  |           | 4 | EGA4-1 |
| Cell-To-Cell Signaling and Interaction, Cellular Growth and Proliferation, Nervous System Development and Function                                                                                   | Excitation of neurons                        | 5.34E-03 |        |           | 4 | EGA4-1 |

|                                                                                                                                                                |                                          |          |   |        |
|----------------------------------------------------------------------------------------------------------------------------------------------------------------|------------------------------------------|----------|---|--------|
| Connective Tissue Development and Function, Skeletal and Muscular System Development and Function, Tissue Development                                          | Morphology of trabecular bone            | 7.66E-03 | 4 | EGA4-1 |
| Lipid Metabolism, Small Molecule Biochemistry, Vitamin and Mineral Metabolism                                                                                  | Metabolism of cholesterol                | 2.66E-03 | 4 | EGA4-1 |
| Cell-To-Cell Signaling and Interaction, Embryonic Development                                                                                                  | Binding of embryonic cell lines          | 7.66E-03 | 4 | EGA4-1 |
| Digestive System Development and Function, Organ Morphology, Organismal Development                                                                            | Size of pancreas                         | 1.18E-03 | 4 | EGA4-1 |
| Cell-To-Cell Signaling and Interaction, Connective Tissue Development and Function                                                                             | Binding of fibroblasts                   | 4.85E-03 | 4 | EGA4-1 |
| Cell Death and Survival, Skeletal and Muscular System Development and Function                                                                                 | Cell viability of muscle cells           | 3.00E-03 | 4 | EGA4-1 |
| Behavior                                                                                                                                                       | Anxiety-like behavior                    | 4.38E-03 | 4 | EGA4-1 |
| Organ Morphology, Skeletal and Muscular System Development and Function                                                                                        | Morphology of skeletal muscle            | 3.17E-03 | 4 | EGA4-1 |
| Skeletal and Muscular System Development and Function                                                                                                          | Function of muscle                       | 2.19E-02 | 4 | EGA4-2 |
| Cellular Movement                                                                                                                                              | Cell movement of fibrosarcoma cell lines | 2.65E-04 | 4 | EGA4-2 |
| Reproductive System Development and Function                                                                                                                   | Fertility                                | 2.47E-02 | 4 | EGA4-2 |
| Cardiovascular System Development and Function, Organ Morphology, Organismal Development                                                                       | Size of heart                            | 2.68E-03 | 4 | EGA4-2 |
| Skeletal and Muscular System Development and Function                                                                                                          | Size of muscle                           | 5.78E-03 | 4 | EGA4-2 |
| Cell Morphology, Cellular Compromise                                                                                                                           | Collapse of growth cone                  | 9.76E-04 | 4 | EGA4-2 |
| Cellular Movement                                                                                                                                              | Cell movement of lung cancer cell lines  | 1.06E-02 | 4 | EGA4-2 |
| Cardiovascular System Development and Function, Cell-To-Cell Signaling and Interaction                                                                         | Binding of endothelial cells             | 3.60E-03 | 4 | EGA4-3 |
| Cellular Development, Connective Tissue Development and Function, Tissue Development                                                                           | Differentiation of bone cells            | 7.49E-03 | 4 | EGA4-3 |
| Cellular Development, Cellular Growth and Proliferation, Digestive System Development and Function, Hepatic System Development and Function, Organ Development | Proliferation of liver cells             | 2.25E-03 | 4 | EGA4-3 |
| Cellular Movement, Hematological System Development and Function, Immune Cell Trafficking                                                                      | Cellular infiltration by granulocytes    | 6.32E-03 | 4 | EGA4-3 |
| Organ Development, Organ Morphology, Skeletal and Muscular System Development and Function                                                                     | Mass of skeletal muscle                  | 6.83E-03 | 3 | EGA4-1 |
| Embryonic Development, Nervous System Development and Function, Organ Development, Organismal Development, Tissue Development                                  | Neurogenesis of hippocampus              | 2.30E-03 | 3 | EGA4-1 |
| Lipid Metabolism, Small Molecule Biochemistry                                                                                                                  | Distribution of lipid                    | 4.73E-03 | 3 | EGA4-1 |
| Cell Morphology, Organ Morphology, Skeletal and Muscular System Development and Function, Tissue Morphology                                                    | Area of muscle cells                     | 2.06E-03 | 3 | EGA4-1 |
| Cell Death and Survival, Connective Tissue Development and Function, Skeletal and Muscular System Development and Function                                     | Survival of osteoclasts                  | 1.65E-03 | 3 | EGA4-1 |
| Cell-To-Cell Signaling and Interaction, Cellular Assembly and Organization                                                                                     | Stabilization of intercellular junctions | 8.45E-04 | 3 | EGA4-1 |
| Free Radical Scavenging, Small Molecule Biochemistry                                                                                                           | Catabolism of hydrogen peroxide          | 1.72E-04 | 3 | EGA4-1 |
| Cell Morphology                                                                                                                                                | Size of leukocytes                       | 4.73E-03 | 3 | EGA4-1 |
| Cell Morphology                                                                                                                                                | Diameter of cells                        | 2.23E-04 | 3 | EGA4-1 |
| Lipid Metabolism, Small Molecule Biochemistry                                                                                                                  | Binding of phospholipid                  | 2.06E-03 | 3 | EGA4-1 |
| Tissue Morphology                                                                                                                                              | Modification of connective tissue        | 1.65E-03 | 3 | EGA4-1 |
| Carbohydrate Metabolism, Molecular Transport                                                                                                                   | Accumulation of glycogen                 | 3.69E-03 | 3 | EGA4-1 |
| Cell Cycle, Connective Tissue Development and Function                                                                                                         | Mitogenesis of fibroblast cell lines     | 4.37E-03 | 3 | EGA4-1 |
| Tissue Morphology                                                                                                                                              | Density of macrophages                   | 2.84E-05 | 3 | EGA4-1 |

|                                                                                                                                                                                                                                                             |                                        |          |   |        |
|-------------------------------------------------------------------------------------------------------------------------------------------------------------------------------------------------------------------------------------------------------------|----------------------------------------|----------|---|--------|
| Cell-To-Cell Signaling and Interaction                                                                                                                                                                                                                      | Attachment of connective tissue cells  | 9.79E-04 | 3 | EGA4-1 |
| Cell-To-Cell Signaling and Interaction, Connective Tissue Development and Function, Skeletal and Muscular System Development and Function                                                                                                                   | Activation of osteoblasts              | 1.46E-03 | 3 | EGA4-1 |
| Connective Tissue Development and Function, Skeletal and Muscular System Development and Function, Tissue Morphology                                                                                                                                        | Quantity of osteoblasts                | 7.30E-03 | 3 | EGA4-1 |
| Cellular Development, Cellular Growth and Proliferation, Embryonic Development                                                                                                                                                                              | Generation of embryonic cell lines     | 6.37E-03 | 3 | EGA4-1 |
| Cell Signaling, Cellular Function and Maintenance, Small Molecule Biochemistry, Vitamin and Mineral Metabolism                                                                                                                                              | Homeostasis of Ca <sup>2+</sup>        | 6.37E-03 | 3 | EGA4-1 |
| Cellular Growth and Proliferation, Nervous System Development and Function, Organ Development                                                                                                                                                               | Proliferation of cerebral cortex cells | 8.45E-04 | 3 | EGA4-1 |
| Connective Tissue Development and Function, Skeletal and Muscular System Development and Function, Tissue Development, Tissue Morphology                                                                                                                    | Thickness of cortical bone             | 2.54E-03 | 3 | EGA4-1 |
| Lipid Metabolism, Molecular Transport, Small Molecule Biochemistry                                                                                                                                                                                          | Quantity of glucosylceramide           | 6.72E-05 | 3 | EGA4-1 |
| Cell-To-Cell Signaling and Interaction                                                                                                                                                                                                                      | Binding of cell surface                | 4.02E-03 | 3 | EGA4-1 |
| Cell-To-Cell Signaling and Interaction, Cellular Assembly and Organization, Nervous System Development and Function, Tissue Morphology                                                                                                                      | Density of synapse                     | 5.94E-03 | 3 | EGA4-1 |
| Organismal Functions, Tissue Morphology                                                                                                                                                                                                                     | Healing of epithelial tissue           | 3.49E-04 | 3 | EGA4-1 |
| Cell-To-Cell Signaling and Interaction, Skeletal and Muscular System Development and Function                                                                                                                                                               | Adhesion of smooth muscle cells        | 3.49E-04 | 3 | EGA4-1 |
| Cell Morphology                                                                                                                                                                                                                                             | Shape change of endothelial cell lines | 1.13E-03 | 3 | EGA4-1 |
| Cell-To-Cell Signaling and Interaction, Cellular Growth and Proliferation                                                                                                                                                                                   | Stimulation of brain cells             | 3.09E-03 | 3 | EGA4-1 |
| Cellular Compromise                                                                                                                                                                                                                                         | Calcification of cells                 | 6.13E-04 | 3 | EGA4-1 |
| Connective Tissue Development and Function, Embryonic Development, Organ Development, Organismal Development, Skeletal and Muscular System Development and Function, Tissue Development                                                                     | Growth of metatarsal bone              | 1.72E-04 | 3 | EGA4-1 |
| Digestive System Development and Function, Organ Morphology, Organismal Development                                                                                                                                                                         | Size of islets of Langerhans           | 6.83E-03 | 3 | EGA4-1 |
| Cell Morphology, Cellular Assembly and Organization, Cellular Development, Cellular Function and Maintenance, Cellular Growth and Proliferation, Embryonic Development, Nervous System Development and Function, Organismal Development, Tissue Development | Branching of axons                     | 1.61E-02 | 3 | EGA4-2 |
| Cell Death and Survival                                                                                                                                                                                                                                     | Cell death of endothelial cell lines   | 5.02E-03 | 3 | EGA4-2 |
| Cellular Development, Cellular Growth and Proliferation, Embryonic Development, Organ Development, Organismal Development, Skeletal and Muscular System Development and Function, Tissue Development                                                        | Myogenesis of myotube                  | 4.14E-03 | 3 | EGA4-2 |
| Cardiovascular System Development and Function                                                                                                                                                                                                              | Morphogenesis of cardiovascular system | 5.02E-03 | 3 | EGA4-2 |
| Cell Morphology, Renal and Urological System Development and Function                                                                                                                                                                                       | Shape change of kidney cell lines      | 6.01E-03 | 3 | EGA4-2 |
| Organismal Development                                                                                                                                                                                                                                      | Quantity of vessel                     | 1.35E-02 | 3 | EGA4-2 |
| Cell-To-Cell Signaling and Interaction                                                                                                                                                                                                                      | Detachment of cells                    | 1.71E-02 | 3 | EGA4-2 |
| Cell-To-Cell Signaling and Interaction, Reproductive System Development and Function                                                                                                                                                                        | Binding of gonadal cell lines          | 1.00E-02 | 3 | EGA4-2 |
| Cell Morphology                                                                                                                                                                                                                                             | Shape change of epithelial cell lines  | 8.18E-04 | 3 | EGA4-2 |
| Organ Morphology, Skeletal and Muscular System Development and Function, Tissue Morphology                                                                                                                                                                  | Quantity of muscle cells               | 2.17E-02 | 3 | EGA4-2 |
| Cell Cycle                                                                                                                                                                                                                                                  | Replication of cells                   | 1.31E-02 | 3 | EGA4-2 |

|                                                                                                                                                                                                                                                                                                        |                                              |          |   |        |
|--------------------------------------------------------------------------------------------------------------------------------------------------------------------------------------------------------------------------------------------------------------------------------------------------------|----------------------------------------------|----------|---|--------|
| Cellular Movement                                                                                                                                                                                                                                                                                      | Cell movement of neuroglia                   | 2.17E-02 | 3 | EGA4-2 |
| Cellular Movement, Hematological System Development and Function, Immune Cell Trafficking                                                                                                                                                                                                              | Transmigration of lymphocytes                | 3.35E-03 | 3 | EGA4-2 |
| Cell Death and Survival                                                                                                                                                                                                                                                                                | Anoikis of carcinoma cell lines              | 9.88E-05 | 3 | EGA4-2 |
| Carbohydrate Metabolism                                                                                                                                                                                                                                                                                | Binding of carbohydrate                      | 1.61E-02 | 3 | EGA4-2 |
| Cellular Assembly and Organization                                                                                                                                                                                                                                                                     | Quantity of filaments                        | 8.23E-03 | 3 | EGA4-3 |
| Cardiovascular System Development and Function, Tissue Morphology                                                                                                                                                                                                                                      | Morphology of blood vessel                   | 2.96E-03 | 3 | EGA4-3 |
| Connective Tissue Development and Function, Skeletal and Muscular System Development and Function, Tissue Morphology                                                                                                                                                                                   | Quantity of osteoblasts                      | 1.89E-04 | 3 | EGA4-3 |
| Cell Morphology                                                                                                                                                                                                                                                                                        | Area of cells                                | 1.40E-03 | 3 | EGA4-3 |
| Cellular Movement                                                                                                                                                                                                                                                                                      | Cell movement of sarcoma cell lines          | 3.89E-03 | 3 | EGA4-3 |
| Cardiovascular System Development and Function, Cellular Development, Cellular Growth and Proliferation, Connective Tissue Development and Function, Digestive System Development and Function, Hepatic System Development and Function, Organ Development, Organismal Development, Tissue Development | Proliferation of hepatic stellate cells      | 3.98E-04 | 3 | EGA4-3 |
| Cell Morphology, Connective Tissue Development and Function, Tissue Morphology                                                                                                                                                                                                                         | Size of connective tissue cells              | 2.45E-03 | 3 | EGA4-3 |
| Gene Expression                                                                                                                                                                                                                                                                                        | Expression of mRNA                           | 1.26E-03 | 3 | EGA4-3 |
| Cell Death and Survival, Nervous System Development and Function                                                                                                                                                                                                                                       | Cell viability of neuroglia                  | 4.43E-04 | 3 | EGA4-3 |
| Cellular Development, Cellular Growth and Proliferation, Embryonic Development, Hematological System Development and Function, Hematopoiesis, Lymphoid Tissue Structure and Development, Organ Development, Organismal Development, Tissue Development                                                 | Development of bone marrow cells             | 9.75E-03 | 3 | EGA4-3 |
| Cardiovascular System Development and Function, Cellular Movement                                                                                                                                                                                                                                      | Cell movement of endothelial cell lines      | 5.42E-03 | 3 | EGA4-3 |
| Cellular Development, Cellular Growth and Proliferation                                                                                                                                                                                                                                                | Cell proliferation of bone cancer cell lines | 5.76E-03 | 3 | EGA4-3 |
| Cell Cycle, Gene Expression                                                                                                                                                                                                                                                                            | Binding of AP1 consensus site                | 5.70E-04 | 3 | EGA4-3 |
| Nervous System Development and Function                                                                                                                                                                                                                                                                | Myelination                                  | 5.31E-03 | 3 | EGA4-3 |
| Cell-To-Cell Signaling and Interaction                                                                                                                                                                                                                                                                 | Adhesion of leukemia cell lines              | 2.96E-03 | 3 | EGA4-3 |
| Cellular Development, Connective Tissue Development and Function, Skeletal and Muscular System Development and Function, Tissue Development                                                                                                                                                            | Differentiation of osteoblasts               | 9.59E-03 | 3 | EGA4-3 |
| Cell Morphology, Organ Morphology, Renal and Urological System Development and Function                                                                                                                                                                                                                | Morphology of mesangial cells                | 1.30E-03 | 2 | EGA4-1 |
| Skeletal and Muscular System Development and Function, Tissue Development                                                                                                                                                                                                                              | Synthesis of cartilage matrix                | 5.52E-03 | 2 | EGA4-1 |
| Lipid Metabolism, Molecular Transport, Small Molecule Biochemistry                                                                                                                                                                                                                                     | Accumulation of ganglioside                  | 5.52E-03 | 2 | EGA4-1 |
| Cellular Movement                                                                                                                                                                                                                                                                                      | Dissemination of prostate cancer cell lines  | 1.30E-03 | 2 | EGA4-1 |
| Lipid Metabolism, Molecular Transport, Small Molecule Biochemistry                                                                                                                                                                                                                                     | Release of cholesterol                       | 6.49E-03 | 2 | EGA4-1 |
| Auditory and Vestibular System Development and Function, Embryonic Development, Organ Development, Organismal Development, Tissue Development                                                                                                                                                          | Formation of cochlear duct                   | 6.49E-03 | 2 | EGA4-1 |
| Cellular Development, Cellular Growth and Proliferation, Connective Tissue Development and Function, Skeletal and Muscular System Development and Function, Tissue Development                                                                                                                         | Development of chondrocytes                  | 7.52E-03 | 2 | EGA4-1 |

|                                                                                                                                                                                                       |                                                |          |   |        |
|-------------------------------------------------------------------------------------------------------------------------------------------------------------------------------------------------------|------------------------------------------------|----------|---|--------|
| Cell-To-Cell Signaling and Interaction, Hematological System Development and Function                                                                                                                 | Response of Th17 cells                         | 3.07E-03 | 2 | EGA4-1 |
| Cellular Movement                                                                                                                                                                                     | Migration of multiple myeloma cells            | 8.74E-04 | 2 | EGA4-1 |
| Gene Expression                                                                                                                                                                                       | Inhibition of mRNA                             | 3.07E-03 | 2 | EGA4-1 |
| Cellular Assembly and Organization, Cellular Function and Maintenance, Cellular Movement                                                                                                              | Movement of actin filaments                    | 8.74E-04 | 2 | EGA4-1 |
| Cellular Development, Cellular Growth and Proliferation, Endocrine System Development and Function, Nervous System Development and Function, Organ Development                                        | Proliferation of anterior pituitary cells      | 3.81E-03 | 2 | EGA4-1 |
| Cell-To-Cell Signaling and Interaction                                                                                                                                                                | Adhesion of neuroglia                          | 6.49E-03 | 2 | EGA4-1 |
| Cardiovascular System Development and Function, Cell Morphology, Skeletal and Muscular System Development and Function                                                                                | Relengthening of cardiomyocytes                | 8.91E-05 | 2 | EGA4-1 |
| Cellular Development, Cellular Growth and Proliferation, Connective Tissue Development and Function, Skeletal and Muscular System Development and Function, Tissue Development                        | Chondrogenesis of fibroblast cell lines        | 8.74E-04 | 2 | EGA4-1 |
| Molecular Transport, Nucleic Acid Metabolism, Small Molecule Biochemistry                                                                                                                             | Transport of rosuvastatin                      | 2.40E-03 | 2 | EGA4-1 |
| Cellular Movement                                                                                                                                                                                     | Invasion of myeloma cell lines                 | 2.66E-04 | 2 | EGA4-1 |
| Cellular Function and Maintenance                                                                                                                                                                     | Homeostasis of neurons                         | 8.74E-04 | 2 | EGA4-1 |
| Cellular Growth and Proliferation, Connective Tissue Development and Function                                                                                                                         | Proliferation of stromal cell lines            | 2.66E-04 | 2 | EGA4-1 |
| Cellular Development, Cellular Growth and Proliferation, Connective Tissue Development and Function, Embryonic Development, Skeletal and Muscular System Development and Function, Tissue Development | Chondrogenesis of embryonic cell lines         | 1.30E-03 | 2 | EGA4-1 |
| Cell Morphology, Cellular Compromise                                                                                                                                                                  | Vacuolation of epithelial cells                | 8.74E-04 | 2 | EGA4-1 |
| Cell Death and Survival                                                                                                                                                                               | Pyknosis                                       | 1.81E-03 | 2 | EGA4-1 |
| Tissue Morphology                                                                                                                                                                                     | Thickening of basement membrane                | 3.81E-03 | 2 | EGA4-1 |
| Free Radical Scavenging, Molecular Transport, Small Molecule Biochemistry                                                                                                                             | Release of hydrogen peroxide                   | 4.63E-03 | 2 | EGA4-1 |
| Lipid Metabolism, Small Molecule Biochemistry                                                                                                                                                         | Recruitment of phospholipid                    | 2.66E-04 | 2 | EGA4-1 |
| Behavior                                                                                                                                                                                              | Active avoidance response                      | 2.66E-04 | 2 | EGA4-1 |
| Organ Development, Organ Morphology, Skeletal and Muscular System Development and Function                                                                                                            | Mass of extensor muscle                        | 4.63E-03 | 2 | EGA4-1 |
| Cellular Development, Cellular Growth and Proliferation, Embryonic Development, Nervous System Development and Function, Organ Development, Organismal Development, Tissue Development                | Neurogenesis of brain cells                    | 6.49E-03 | 2 | EGA4-1 |
| Nervous System Development and Function                                                                                                                                                               | Neuroprotection of tumor cell lines            | 2.40E-03 | 2 | EGA4-1 |
| Cell Death and Survival, Skeletal and Muscular System Development and Function                                                                                                                        | Cell viability of vascular smooth muscle cells | 6.49E-03 | 2 | EGA4-1 |
| Tissue Morphology                                                                                                                                                                                     | Density of microglia                           | 2.66E-04 | 2 | EGA4-1 |
| Cellular Assembly and Organization                                                                                                                                                                    | Rearrangement of actin stress fibers           | 1.30E-03 | 2 | EGA4-1 |
| Cellular Movement                                                                                                                                                                                     | Migration of endometrial cancer cell lines     | 4.63E-03 | 2 | EGA4-1 |
| Connective Tissue Development and Function, Tissue Development, Tissue Morphology                                                                                                                     | Regeneration of bone                           | 4.63E-03 | 2 | EGA4-1 |
| Cell Cycle                                                                                                                                                                                            | Mitogenesis of central nervous system cells    | 3.07E-03 | 2 | EGA4-1 |
| Cell Morphology, Organ Morphology, Skeletal and Muscular System Development and Function, Tissue Morphology                                                                                           | Diameter of myofiber                           | 1.81E-03 | 2 | EGA4-1 |
| Lipid Metabolism, Molecular Transport, Small Molecule Biochemistry                                                                                                                                    | Quantity of sulfatides                         | 5.28E-04 | 2 | EGA4-1 |

|                                                                                                                                                                    |                                             |          |   |        |
|--------------------------------------------------------------------------------------------------------------------------------------------------------------------|---------------------------------------------|----------|---|--------|
| Cellular Development, Cellular Growth and Proliferation, Embryonic Development, Nervous System Development and Function, Organismal Development, Tissue Morphology | Quantity of neuroblasts                     | 5.52E-03 | 2 | EGA4-1 |
| Connective Tissue Development and Function, Skeletal and Muscular System Development and Function, Tissue Development, Tissue Morphology                           | Size of medullary cavity                    | 2.66E-04 | 2 | EGA4-1 |
| Cardiovascular System Development and Function, Cell Morphology, Cellular Movement                                                                                 | Cell spreading of endothelial cell lines    | 4.63E-03 | 2 | EGA4-1 |
| Lipid Metabolism, Small Molecule Biochemistry                                                                                                                      | Binding of cholesterol                      | 5.28E-04 | 2 | EGA4-1 |
| Lipid Metabolism, Molecular Transport, Small Molecule Biochemistry                                                                                                 | Quantity of ganglioside GD3                 | 1.81E-03 | 2 | EGA4-1 |
| Nervous System Development and Function, Organ Morphology, Organismal Development                                                                                  | Volume of cerebrum                          | 1.81E-03 | 2 | EGA4-1 |
| Cellular Compromise                                                                                                                                                | Damage of tumor cell lines                  | 3.81E-03 | 2 | EGA4-1 |
| Cell-To-Cell Signaling and Interaction, Cellular Growth and Proliferation, Hematological System Development and Function, Hematopoiesis                            | Stimulation of red blood cells              | 4.63E-03 | 2 | EGA4-1 |
| Cellular Assembly and Organization                                                                                                                                 | Aggregation of filaments                    | 4.63E-03 | 2 | EGA4-1 |
| Cellular Movement                                                                                                                                                  | Movement of endocrine cell lines            | 6.49E-03 | 2 | EGA4-1 |
| Connective Tissue Development and Function, Skeletal and Muscular System Development and Function, Tissue Development                                              | Surface area of bone                        | 5.52E-03 | 2 | EGA4-1 |
| Cellular Growth and Proliferation, Nervous System Development and Function, Organ Development                                                                      | Proliferation of hippocampal cells          | 1.81E-03 | 2 | EGA4-1 |
| Carbohydrate Metabolism, Molecular Transport, Small Molecule Biochemistry                                                                                          | Deposition of proteoglycan                  | 8.74E-04 | 2 | EGA4-1 |
| Embryonic Development                                                                                                                                              | Regression of embryonic tissue              | 4.63E-03 | 2 | EGA4-1 |
| Carbohydrate Metabolism                                                                                                                                            | Storage of glycogen                         | 6.49E-03 | 2 | EGA4-1 |
| Cellular Movement                                                                                                                                                  | Invasion of lymphoma cell lines             | 4.63E-03 | 2 | EGA4-1 |
| Cell Death and Survival, Cellular Compromise, Nervous System Development and Function                                                                              | Cytotoxicity of neurons                     | 6.49E-03 | 2 | EGA4-1 |
| Cellular Development, Nervous System Development and Function, Tissue Development                                                                                  | Differentiation of cholinergic neurons      | 5.52E-03 | 2 | EGA4-1 |
| Lipid Metabolism, Molecular Transport, Small Molecule Biochemistry                                                                                                 | Distribution of cholesterol                 | 4.63E-03 | 2 | EGA4-1 |
| Behavior, Nervous System Development and Function                                                                                                                  | Context memory                              | 3.07E-03 | 2 | EGA4-1 |
| Energy Production, Lipid Metabolism, Small Molecule Biochemistry                                                                                                   | Oxidation of cholesterol                    | 1.30E-03 | 2 | EGA4-1 |
| Cell-To-Cell Signaling and Interaction, Cellular Growth and Proliferation, Connective Tissue Development and Function                                              | Stimulation of chondrocytes                 | 5.28E-04 | 2 | EGA4-1 |
| Cell Cycle                                                                                                                                                         | Mitogenesis of neuroglia                    | 3.07E-03 | 2 | EGA4-1 |
| Cell Morphology, Cellular Function and Maintenance, Organ Morphology, Skeletal and Muscular System Development and Function, Tissue Morphology                     | Length of muscle cells                      | 3.81E-03 | 2 | EGA4-1 |
| Cellular Development                                                                                                                                               | Differentiation of stromal cell lines       | 6.49E-03 | 2 | EGA4-1 |
| Cell Morphology                                                                                                                                                    | Morphology of prostate cell lines           | 2.40E-03 | 2 | EGA4-1 |
| Cardiovascular System Development and Function, Cell Morphology, Organ Development, Skeletal and Muscular System Development and Function                          | Shortening of cardiomyocytes                | 5.52E-03 | 2 | EGA4-1 |
| Carbohydrate Metabolism, Lipid Metabolism, Small Molecule Biochemistry                                                                                             | Binding of phosphatidic acid                | 9.77E-03 | 2 | EGA4-2 |
| Embryonic Development, Tissue Morphology                                                                                                                           | Structural integrity of Reichert's membrane | 3.29E-05 | 2 | EGA4-2 |



|                                                                                                                                                                                                                                                                                                                             |                                                     |          |   |        |
|-----------------------------------------------------------------------------------------------------------------------------------------------------------------------------------------------------------------------------------------------------------------------------------------------------------------------------|-----------------------------------------------------|----------|---|--------|
| Cardiovascular System Development and Function, Cell Morphology, Embryonic Development, Organ Development, Organ Morphology, Organismal Development, Skeletal and Muscular System Development and Function, Tissue Development, Tissue Morphology                                                                           | Area of cardiomyocytes                              | 2.86E-03 | 2 | EGA4-2 |
| Cardiovascular System Development and Function, Embryonic Development, Organ Development, Organ Morphology, Organismal Development, Tissue Development                                                                                                                                                                      | Morphogenesis of heart                              | 3.74E-03 | 2 | EGA4-2 |
| Cell-To-Cell Signaling and Interaction, Cellular Assembly and Organization, Cellular Function and Maintenance, Tissue Development                                                                                                                                                                                           | Formation of fibronectin matrix                     | 2.86E-03 | 2 | EGA4-2 |
| Cardiovascular System Development and Function, Embryonic Development, Organ Development, Organismal Development, Tissue Development                                                                                                                                                                                        | Formation of heart ventricle                        | 1.37E-02 | 2 | EGA4-2 |
| Carbohydrate Metabolism, Lipid Metabolism, Small Molecule Biochemistry                                                                                                                                                                                                                                                      | Phosphorylation of phosphatidic acid                | 4.23E-03 | 2 | EGA4-2 |
| Cellular Movement                                                                                                                                                                                                                                                                                                           | Haptotaxis of cells                                 | 1.46E-02 | 2 | EGA4-2 |
| Cell-To-Cell Signaling and Interaction                                                                                                                                                                                                                                                                                      | Detachment of tumor cell lines                      | 1.05E-02 | 2 | EGA4-2 |
| Cell Morphology, Cellular Movement, Hair and Skin Development and Function                                                                                                                                                                                                                                                  | Cell spreading of epithelial cell lines             | 4.23E-03 | 2 | EGA4-2 |
| Cellular Movement                                                                                                                                                                                                                                                                                                           | Migration of bone cancer cell lines                 | 2.55E-02 | 2 | EGA4-2 |
| Cell Death and Survival                                                                                                                                                                                                                                                                                                     | Anoikis of lung cancer cell lines                   | 1.15E-03 | 2 | EGA4-2 |
| Cellular Movement                                                                                                                                                                                                                                                                                                           | Chemotaxis of sarcoma cell lines                    | 9.00E-04 | 2 | EGA4-2 |
| Embryonic Development, Organismal Development                                                                                                                                                                                                                                                                               | Morphogenesis of head                               | 1.13E-02 | 2 | EGA4-2 |
| Cellular Movement                                                                                                                                                                                                                                                                                                           | Cell movement of neuroblastoma cell lines           | 2.02E-02 | 2 | EGA4-2 |
| Cell Death and Survival                                                                                                                                                                                                                                                                                                     | Apoptosis of oligodendrocytes                       | 2.12E-02 | 2 | EGA4-2 |
| Cardiovascular System Development and Function                                                                                                                                                                                                                                                                              | Morphology of vessel component                      | 9.77E-03 | 2 | EGA4-2 |
| Cell Morphology                                                                                                                                                                                                                                                                                                             | Shape change of cervical cancer cell lines          | 1.29E-02 | 2 | EGA4-2 |
| Cardiovascular System Development and Function, Cellular Assembly and Organization, Cellular Development, Cellular Function and Maintenance, Cellular Growth and Proliferation, Embryonic Development, Organ Development, Organismal Development, Skeletal and Muscular System Development and Function, Tissue Development | Organization of sarcomere                           | 1.75E-03 | 2 | EGA4-2 |
| Cell-To-Cell Signaling and Interaction                                                                                                                                                                                                                                                                                      | Deadhesion of cells                                 | 9.00E-04 | 2 | EGA4-2 |
| Cell Morphology                                                                                                                                                                                                                                                                                                             | Cell rounding of tumor cell lines                   | 1.29E-02 | 2 | EGA4-2 |
| Cell-mediated Immune Response, Cellular Movement, Hematological System Development and Function, Immune Cell Trafficking                                                                                                                                                                                                    | Transmigration of T lymphocytes                     | 2.55E-02 | 2 | EGA4-2 |
| Cell Morphology                                                                                                                                                                                                                                                                                                             | Shape change of melanoma cell lines                 | 6.43E-03 | 2 | EGA4-2 |
| Carbohydrate Metabolism, Lipid Metabolism, Molecular Transport, Small Molecule Biochemistry                                                                                                                                                                                                                                 | Quantity of phosphatidylinositol-3,4,5-triphosphate | 1.73E-02 | 2 | EGA4-2 |
| Connective Tissue Development and Function, Tissue Morphology                                                                                                                                                                                                                                                               | Quantity of fibroblasts                             | 1.82E-02 | 2 | EGA4-2 |
| Cellular Function and Maintenance                                                                                                                                                                                                                                                                                           | Ingestion of cells                                  | 2.86E-03 | 2 | EGA4-2 |
| Carbohydrate Metabolism, Lipid Metabolism, Molecular Transport, Small Molecule Biochemistry                                                                                                                                                                                                                                 | Quantity of phosphatidylinositol 3,4-diphosphate    | 2.86E-03 | 2 | EGA4-2 |
| Cell Morphology, Cellular Movement                                                                                                                                                                                                                                                                                          | Cell spreading of bone cancer cell lines            | 1.15E-03 | 2 | EGA4-2 |
| Carbohydrate Metabolism, Lipid Metabolism, Molecular Transport, Small Molecule Biochemistry                                                                                                                                                                                                                                 | Quantity of phosphatidylinositol phosphate          | 1.13E-02 | 2 | EGA4-2 |
| Cardiovascular System Development and Function, Embryonic Development, Organismal Development, Tissue Development                                                                                                                                                                                                           | Angiogenesis of chorioallantoic membrane            | 1.46E-02 | 2 | EGA4-2 |
| Cardiovascular System Development and Function, Cellular Development, Cellular Function and Maintenance, Cellular Growth and Proliferation, Organismal Development, Tissue Development                                                                                                                                      | Proliferation of microvascular endothelial cells    | 1.21E-02 | 2 | EGA4-2 |

|                                                                                                                                                |                                           |          |   |        |
|------------------------------------------------------------------------------------------------------------------------------------------------|-------------------------------------------|----------|---|--------|
| Tissue Morphology                                                                                                                              | Structural integrity of basement membrane | 9.83E-05 | 2 | EGA4-2 |
| Tissue Development                                                                                                                             | Formation of connective tissue            | 1.73E-02 | 2 | EGA4-2 |
| Cellular Assembly and Organization, Cellular Function and Maintenance                                                                          | Formation of actin cytoskeleton           | 9.77E-03 | 2 | EGA4-2 |
| Cellular Movement                                                                                                                              | Invasion of fibrosarcoma cell lines       | 1.05E-02 | 2 | EGA4-2 |
| Cellular Movement, Hematological System Development and Function, Immune Cell Trafficking                                                      | Transendothelial migration of leukocytes  | 6.63E-03 | 2 | EGA4-3 |
| Cell Cycle                                                                                                                                     | Re-entry into S phase                     | 4.11E-03 | 2 | EGA4-3 |
| Protein Synthesis                                                                                                                              | Metabolism of peptide                     | 4.11E-03 | 2 | EGA4-3 |
| Embryonic Development, Organismal Development, Skeletal and Muscular System Development and Function, Tissue Development                       | Delay in ossification of embryonic tissue | 6.90E-06 | 2 | EGA4-3 |
| Cellular Function and Maintenance, Molecular Transport, Protein Trafficking                                                                    | Endocytosis of protein                    | 1.54E-03 | 2 | EGA4-3 |
| Cell-To-Cell Signaling and Interaction, Hematological System Development and Function                                                          | Response of helper T lymphocytes          | 9.04E-03 | 2 | EGA4-3 |
| Cellular Movement                                                                                                                              | Invasion of adenocarcinoma cell lines     | 8.09E-04 | 2 | EGA4-3 |
| Cellular Development                                                                                                                           | Transdifferentiation of cells             | 9.37E-03 | 2 | EGA4-3 |
| Embryonic Development, Hair and Skin Development and Function, Organ Development, Organ Morphology, Organismal Development, Tissue Development | Thickness of epidermis                    | 2.68E-03 | 2 | EGA4-3 |
| Cellular Assembly and Organization                                                                                                             | Accumulation of granules                  | 7.09E-04 | 2 | EGA4-3 |
| Carbohydrate Metabolism, Digestive System Development and Function, Hepatic System Development and Function                                    | Gluconeogenesis of liver                  | 8.09E-04 | 2 | EGA4-3 |
| Cellular Assembly and Organization                                                                                                             | Accumulation of lysosome                  | 1.15E-03 | 2 | EGA4-3 |
| Cellular Movement                                                                                                                              | Cell movement of bone cancer cell lines   | 1.04E-02 | 2 | EGA4-3 |
| Cell Morphology                                                                                                                                | Surface area of cells                     | 2.86E-03 | 2 | EGA4-3 |
| Gene Expression, RNA Damage and Repair, RNA Post-Transcriptional Modification                                                                  | Stabilization of mRNA                     | 8.09E-04 | 2 | EGA4-3 |
| Cell Death and Survival                                                                                                                        | Cell death of exocrine cells              | 5.05E-03 | 2 | EGA4-3 |
| Cellular Assembly and Organization                                                                                                             | Quantity of nucleus                       | 7.20E-03 | 2 | EGA4-3 |
| Connective Tissue Development and Function, Skeletal and Muscular System Development and Function, Tissue Development                          | Area of bone                              | 1.40E-03 | 2 | EGA4-3 |
| Digestive System Development and Function, Organ Morphology, Organismal Development                                                            | Morphology of islets of Langerhans        | 1.04E-02 | 2 | EGA4-3 |
| Cell Morphology, Connective Tissue Development and Function, Tissue Morphology                                                                 | Area of connective tissue cells           | 4.48E-04 | 2 | EGA4-3 |
| Cell Death and Survival, Nervous System Development and Function                                                                               | Survival of oligodendrocytes              | 1.54E-03 | 2 | EGA4-3 |
| Carbohydrate Metabolism, Molecular Transport, Nucleic Acid Metabolism, Small Molecule Biochemistry                                             | Quantity of UDP-D-glucose                 | 2.07E-05 | 2 | EGA4-3 |
| Cellular Development, Cellular Growth and Proliferation, Nervous System Development and Function                                               | Proliferation of Schwann cells            | 3.25E-03 | 2 | EGA4-3 |
| Cell Death and Survival                                                                                                                        | Apoptosis of chondrocytes                 | 4.57E-03 | 2 | EGA4-3 |
| Cellular Movement                                                                                                                              | Dissemination of tumor cell lines         | 2.32E-03 | 2 | EGA4-3 |
| Hair and Skin Development and Function, Organ Development                                                                                      | Growth of skin                            | 7.10E-03 | 2 | EGA4-4 |

a) The p-value: statistical overlap of differentially expressed gene list and gene set

b) Z-score:  $z > 1.96$  to be significantly activated or increased, and those with  $z < -1.96$  to be significantly inhibited
