# Supplementary material
Source: PubMed Central journal article supplement (PMC6417155)
Supplement: gaz001_schall_et_al._table_s20.pdf [file gaz001_schall_et_al._table_s20.pdf]

Table S20 - IPA biological functions unique to BL-Down super-group

| Categories                                                                                                                                                                                                                                                                                                                                                       | Functions Annotation                             | p-value <sup>a</sup> | Z-score <sup>b</sup> | Activation State | Total DEGs | Sub-Group |
|------------------------------------------------------------------------------------------------------------------------------------------------------------------------------------------------------------------------------------------------------------------------------------------------------------------------------------------------------------------|--------------------------------------------------|----------------------|----------------------|------------------|------------|-----------|
| Digestive System Development and Function                                                                                                                                                                                                                                                                                                                        | Development of gastrointestinal tract            | 3.06E-03             |                      |                  | 4          | BL-Down-1 |
| Cardiovascular System Development and Function, Hematological System Development and Function                                                                                                                                                                                                                                                                    | Blood pressure                                   | 2.63E-02             |                      |                  | 4          | BL-Down-1 |
| Cellular Growth and Proliferation, Reproductive System Development and Function                                                                                                                                                                                                                                                                                  | Colony formation of breast cell lines            | 1.78E-03             |                      |                  | 2          | BL-Down-1 |
| Cell Morphology                                                                                                                                                                                                                                                                                                                                                  | Permeabilization of mitochondrial outer membrane | 3.30E-03             |                      |                  | 2          | BL-Down-1 |
| Cellular Growth and Proliferation, Hair and Skin Development and Function                                                                                                                                                                                                                                                                                        | Colony formation of epithelial cell lines        | 7.09E-03             |                      |                  | 2          | BL-Down-1 |
| Cardiovascular System Development and Function, Cell-To-Cell Signaling and Interaction                                                                                                                                                                                                                                                                           | Activation of vascular endothelial cells         | 7.60E-03             |                      |                  | 2          | BL-Down-1 |
| Cellular Assembly and Organization                                                                                                                                                                                                                                                                                                                               | Shortening of telomeres                          | 7.60E-03             |                      |                  | 2          | BL-Down-1 |
| Molecular Transport                                                                                                                                                                                                                                                                                                                                              | Transport of Na <sup>+</sup>                     | 8.12E-03             |                      |                  | 2          | BL-Down-1 |
| Cell-To-Cell Signaling and Interaction, Hematological System Development and Function, Humoral Immune Response                                                                                                                                                                                                                                                   | Response of B lymphocytes                        | 8.65E-03             |                      |                  | 2          | BL-Down-1 |
| Lymphoid Tissue Structure and Development                                                                                                                                                                                                                                                                                                                        | Frequency of B lymphocytes                       | 8.65E-03             |                      |                  | 2          | BL-Down-1 |
| Behavior                                                                                                                                                                                                                                                                                                                                                         | Exploratory behavior                             | 9.20E-03             |                      |                  | 2          | BL-Down-1 |
| Cell-To-Cell Signaling and Interaction, Cell-mediated Immune Response, Cellular Development, Cellular Function and Maintenance, Cellular Growth and Proliferation, Embryonic Development, Hematological System Development and Function, Hematopoiesis, Lymphoid Tissue Structure and Development, Organ Development, Organismal Development, Tissue Development | Selection of T lymphocytes                       | 9.20E-03             |                      |                  | 2          | BL-Down-1 |
| Cell Morphology, Cellular Compromise                                                                                                                                                                                                                                                                                                                             | Multinucleation of tumor cell lines              | 9.20E-03             |                      |                  | 2          | BL-Down-1 |
| Cell Cycle, Cell Morphology, Cellular Assembly and Organization, Cellular Function and Maintenance                                                                                                                                                                                                                                                               | Length of telomeres                              | 1.48E-02             |                      |                  | 2          | BL-Down-1 |
| Cell Cycle                                                                                                                                                                                                                                                                                                                                                       | G1 phase of bone cancer cell lines               | 2.08E-02             |                      |                  | 2          | BL-Down-1 |
| Cell-mediated Immune Response, Cellular Movement, Hematological System Development and Function, Immune Cell Trafficking                                                                                                                                                                                                                                         | NK cell migration                                | 2.08E-02             |                      |                  | 2          | BL-Down-1 |
| Cellular Function and Maintenance                                                                                                                                                                                                                                                                                                                                | Movement of organelle                            | 3.21E-02             |                      |                  | 2          | BL-Down-1 |
| Cell Death and Survival                                                                                                                                                                                                                                                                                                                                          | Cell death of gastrointestinal cells             | 3.81E-02             |                      |                  | 2          | BL-Down-1 |
| Organ Morphology, Reproductive System Development and Function, Tissue Morphology                                                                                                                                                                                                                                                                                | Quantity of male germ cells                      | 4.01E-02             |                      |                  | 2          | BL-Down-1 |
| Cellular Assembly and Organization                                                                                                                                                                                                                                                                                                                               | Formation of membrane ruffles                    | 4.12E-02             |                      |                  | 2          | BL-Down-1 |
| Cell Death and Survival                                                                                                                                                                                                                                                                                                                                          | Cell death of fibrosarcoma cell lines            | 4.65E-02             |                      |                  | 2          | BL-Down-1 |

a) The p-value: statistical overlap of differentially expressed gene list and gene set

b) Z-score:  $z > 1.96$  to be significantly activated or increased, and those with  $z < -1.96$  to be significantly inhibited
