# Supplementary material
Source: PubMed Central journal article supplement (PMC6417155)
Supplement: gaz001_schall_et_al._table_s21.pdf [file gaz001_schall_et_al._table_s21.pdf]

Table S21 - IPA canonical pathways of the MII to 8-cell mega-group

| Canonical Pathways                                     | p-value <sup>a</sup> | Z-score <sup>b</sup> | Activation State | Total DEGs |
|--------------------------------------------------------|----------------------|----------------------|------------------|------------|
| EIF2 Signaling                                         | 3.16E-22             | 4.352                | Activated        | 66         |
| Insulin Receptor Signaling                             | 6.92E-03             | 2.828                | Activated        | 20         |
| Estrogen-mediated S-phase Entry                        | 1.35E-02             | 2.449                | Activated        | 6          |
| Endometrial Cancer Signaling                           | 2.63E-02             | 2.333                | Activated        | 10         |
| Non-Small Cell Lung Cancer Signaling                   | 3.72E-02             | 2.333                | Activated        | 11         |
| Acute Myeloid Leukemia Signaling                       | 1.32E-02             | 2.309                | Activated        | 14         |
| Purine Nucleotides De Novo Biosynthesis II             | 9.12E-04             | 2.236                | Activated        | 5          |
| Glycolysis I                                           | 4.79E-02             | 2.236                | Activated        | 5          |
| IGF-1 Signaling                                        | 1.41E-03             | 2.138                | Activated        | 18         |
| VEGF Signaling                                         | 6.17E-03             | 2.111                | Activated        | 16         |
| ErbB2-ErbB3 Signaling                                  | 1.78E-02             | 2.111                | Activated        | 11         |
| PDGF Signaling                                         | 2.24E-02             | 1.941                |                  | 13         |
| GM-CSF Signaling                                       | 2.57E-02             | 1.897                |                  | 11         |
| Cell Cycle: G1/S Checkpoint Regulation                 | 3.47E-02             | -1.897               |                  | 10         |
| Aryl Hydrocarbon Receptor Signaling                    | 2.69E-02             | 1.732                |                  | 18         |
| RANK Signaling in Osteoclasts                          | 2.75E-02             | 1.732                |                  | 14         |
| Regulation of eIF4 and p70S6K Signaling                | 3.16E-12             | 1.667                |                  | 41         |
| Small Cell Lung Cancer Signaling                       | 1.45E-02             | 1.667                |                  | 13         |
| Induction of Apoptosis by HIV1                         | 4.68E-02             | 1.667                |                  | 9          |
| Gluconeogenesis I                                      | 1.35E-02             | 1.633                |                  | 6          |
| Cardiac Hypertrophy Signaling                          | 1.70E-02             | 1.633                |                  | 28         |
| EGF Signaling                                          | 1.58E-02             | 1.508                |                  | 11         |
| Sirtuin Signaling Pathway                              | 3.31E-02             | 1.46                 |                  | 32         |
| IL-2 Signaling                                         | 2.63E-02             | 1.414                |                  | 10         |
| Apoptosis Signaling                                    | 1.00E-02             | 1.387                |                  | 14         |
| Telomerase Signaling                                   | 1.26E-02             | 1.387                |                  | 16         |
| Methionine Degradation I (to Homocysteine)             | 2.51E-02             | 1.342                |                  | 5          |
| Pyrimidine Deoxyribonucleotides De Novo Biosynthesis I | 3.02E-02             | 1.342                |                  | 5          |
| Cysteine Biosynthesis III (mammalia)                   | 3.55E-02             | 1.342                |                  | 5          |
| Integrin Signaling                                     | 3.63E-02             | 1.342                |                  | 25         |
| Phosphatidylglycerol Biosynthesis II (Non-plastidic)   | 4.79E-02             | -1.342               |                  | 5          |
| HGF Signaling                                          | 1.48E-03             | 1.213                |                  | 19         |
| Glioma Signaling                                       | 3.24E-03             | 1.155                |                  | 18         |
| mTOR Signaling                                         | 1.07E-09             | 1.147                |                  | 43         |
| AMPK Signaling                                         | 5.75E-03             | 1.147                |                  | 28         |
| UVC-Induced MAPK Signaling                             | 1.70E-02             | -1.134               |                  | 8          |
| Aldosterone Signaling in Epithelial Cells              | 6.03E-03             | 1.069                |                  | 23         |
| Gαq Signaling                                          | 1.32E-04             | 1.043                |                  | 27         |
| Prolactin Signaling                                    | 2.00E-04             | 1                    |                  | 17         |
| Amyloid Processing                                     | 4.37E-02             | -1                   |                  | 8          |
| Sumoylation Pathway                                    | 7.41E-03             | -0.905               |                  | 15         |
| ErbB4 Signaling                                        | 2.34E-02             | 0.905                |                  | 11         |
| Neuregulin Signaling                                   | 4.07E-02             | 0.905                |                  | 12         |
| Thrombopoietin Signaling                               | 1.38E-03             | 0.832                |                  | 13         |
| PI3K/AKT Signaling                                     | 8.51E-03             | 0.775                |                  | 18         |
| Ephrin Receptor Signaling                              | 3.31E-02             | 0.728                |                  | 21         |
| Thrombin Signaling                                     | 4.90E-02             | 0.728                |                  | 23         |
| HIPPO signaling                                        | 3.80E-02             | -0.707               |                  | 12         |
| Antioxidant Action of Vitamin C                        | 2.09E-02             | 0.632                |                  | 15         |
| IL-8 Signaling                                         | 6.03E-03             | 0.626                |                  | 26         |
| Growth Hormone Signaling                               | 1.45E-02             | 0.577                |                  | 13         |
| NF-κB Activation by Viruses                            | 3.80E-02             | 0.577                |                  | 12         |

|                                                                       |          |        |    |
|-----------------------------------------------------------------------|----------|--------|----|
| VEGF Family Ligand-Receptor Interactions                              | 4.07E-02 | 0.577  | 12 |
| IL-3 Signaling                                                        | 4.90E-03 | 0.535  | 14 |
| LPS-stimulated MAPK Signaling                                         | 7.41E-03 | 0.535  | 14 |
| Fc Epsilon RI Signaling                                               | 4.47E-02 | 0.535  | 15 |
| p70S6K Signaling                                                      | 1.48E-02 | 0.5    | 18 |
| IL-6 Signaling                                                        | 2.19E-02 | 0.5    | 17 |
| CXCR4 Signaling                                                       | 3.31E-02 | 0.5    | 20 |
| Huntington's Disease Signaling                                        | 7.24E-03 | -0.471 | 31 |
| Production of Nitric Oxide and Reactive Oxygen Species in Macrophages | 9.33E-03 | -0.408 | 25 |
| Cyclins and Cell Cycle Regulation                                     | 2.34E-02 | 0.378  | 12 |
| Cell Cycle: G2/M DNA Damage Checkpoint Regulation                     | 3.89E-02 | 0.378  | 8  |
| p53 Signaling                                                         | 2.63E-02 | -0.333 | 15 |
| NRF2-mediated Oxidative Stress Response                               | 4.57E-03 | 0.302  | 26 |
| UVB-Induced MAPK Signaling                                            | 4.79E-03 | 0.302  | 12 |
| CCR3 Signaling in Eosinophils                                         | 1.26E-02 | -0.277 | 18 |
| Fcγ Receptor-mediated Phagocytosis in Macrophages and Monocytes       | 2.88E-02 | 0.277  | 13 |
| 14-3-3-mediated Signaling                                             | 2.95E-03 | 0.258  | 20 |
| fMLP Signaling in Neutrophils                                         | 1.51E-02 | 0.258  | 17 |
| ErbB Signaling                                                        | 2.00E-02 | 0      | 14 |
| Cell Cycle Regulation by BTG Family Proteins                          | 2.29E-02 | 0      | 7  |
| Mitotic Roles of Polo-Like Kinase                                     | 3.16E-02 | 0      | 10 |
| 5-aminoimidazole Ribonucleotide Biosynthesis I                        | 4.79E-04 |        | 3  |
| Protein Ubiquitination Pathway                                        | 8.32E-04 |        | 36 |
| DNA Methylation and Transcriptional Repression Signaling              | 9.33E-04 |        | 9  |
| Virus Entry via Endocytic Pathways                                    | 2.14E-03 |        | 18 |
| Role of Oct4 in Mammalian Embryonic Stem Cell Pluripotency            | 2.51E-03 |        | 10 |
| Systemic Lupus Erythematosus Signaling                                | 3.31E-03 |        | 30 |
| Gap Junction Signaling                                                | 5.25E-03 |        | 26 |
| Vitamin-C Transport                                                   | 6.17E-03 |        | 5  |
| RAN Signaling                                                         | 8.13E-03 |        | 5  |
| Chronic Myeloid Leukemia Signaling                                    | 8.13E-03 |        | 16 |
| Transcriptional Regulatory Network in Embryonic Stem Cells            | 8.32E-03 |        | 10 |
| Hereditary Breast Cancer Signaling                                    | 8.51E-03 |        | 20 |
| Erythropoietin Signaling                                              | 9.77E-03 |        | 13 |
| Breast Cancer Regulation by Stathmin1                                 | 1.00E-02 |        | 26 |
| RAR Activation                                                        | 1.35E-02 |        | 24 |
| Diphthamide Biosynthesis                                              | 1.74E-02 |        | 2  |
| Hypusine Biosynthesis                                                 | 1.74E-02 |        | 2  |
| Remodeling of Epithelial Adherens Junctions                           | 1.78E-02 |        | 11 |
| Myc Mediated Apoptosis Signaling                                      | 1.95E-02 |        | 11 |
| Estrogen Receptor Signaling                                           | 2.19E-02 |        | 17 |
| nNOS Signaling in Neurons                                             | 2.82E-02 |        | 8  |
| Germ Cell-Sertoli Cell Junction Signaling                             | 2.95E-02 |        | 21 |
| N-acetylglucosamine Degradation II                                    | 3.31E-02 |        | 2  |
| Clathrin-mediated Endocytosis Signaling                               | 3.39E-02 |        | 24 |
| IL-12 Signaling and Production in Macrophages                         | 3.63E-02 |        | 18 |
| Embryonic Stem Cell Differentiation into Cardiac Lineages             | 3.80E-02 |        | 3  |
| Mechanisms of Viral Exit from Host Cells                              | 3.80E-02 |        | 7  |
| HER-2 Signaling in Breast Cancer                                      | 4.07E-02 |        | 12 |
| Caveolar-mediated Endocytosis Signaling                               | 4.90E-02 |        | 10 |

a) The p-value: statistical overlap of differentially expressed gene list and gene set

b) Z-score:  $z > 1.96$  to be significantly activated or increased, and those with  $z < -1.96$  to be significantly inhibited
