# Supplementary material
Source: PubMed Central journal article supplement (PMC6417155)
Supplement: gaz001_schall_et_al._table_s22.pdf [file gaz001_schall_et_al._table_s22.pdf]

Table S22 - IPA biological functions of the MII to 8-Cell mega-group

| Categories                                                                                             | Functions Annotation                              | p-value <sup>a</sup> | Z-score <sup>b</sup> | Activation State | Total DEGs |
|--------------------------------------------------------------------------------------------------------|---------------------------------------------------|----------------------|----------------------|------------------|------------|
| Cell Death and Survival                                                                                | Cell viability of tumor cell lines                | 1.29E-05             | 5.609                | Activated        | 147        |
| Cell Death and Survival                                                                                | Cell survival                                     | 5.32E-08             | 5.427                | Activated        | 241        |
| Cell Death and Survival                                                                                | Cell viability                                    | 1.20E-06             | 5.186                | Activated        | 222        |
| Cell Death and Survival                                                                                | Cell viability of colorectal cancer cell lines    | 2.51E-04             | 4.101                | Activated        | 29         |
| Cell Death and Survival                                                                                | Cell viability of myeloma cell lines              | 4.81E-06             | 3.876                | Activated        | 24         |
| Cellular Development, Cellular Growth and Proliferation                                                | Cell proliferation of tumor cell lines            | 1.92E-10             | 3.773                | Activated        | 280        |
| Cell Cycle, DNA Replication, Recombination, and Repair                                                 | Homologous recombination                          | 1.11E-04             | 3.579                | Activated        | 21         |
| DNA Replication, Recombination, and Repair                                                             | Recombination                                     | 9.42E-05             | 3.554                | Activated        | 27         |
| Cell Cycle, DNA Replication, Recombination, and Repair                                                 | DNA recombination                                 | 1.24E-04             | 3.554                | Activated        | 26         |
| Cellular Growth and Proliferation, Embryonic Development                                               | Pluripotency of embryonic cell lines              | 6.37E-08             | 3.463                | Activated        | 16         |
| Cellular Growth and Proliferation                                                                      | Pluripotency of cells                             | 4.24E-07             | 3.349                | Activated        | 18         |
| Cell Cycle, DNA Replication, Recombination, and Repair                                                 | Homologous recombination of cells                 | 9.45E-06             | 3.3                  | Activated        | 18         |
| Cellular Development, Cellular Growth and Proliferation                                                | Cell proliferation of breast cancer cell lines    | 3.33E-06             | 3.14                 | Activated        | 86         |
| Cellular Growth and Proliferation, Embryonic Development                                               | Pluripotency of embryonic stem cell lines         | 7.46E-07             | 2.874                | Activated        | 12         |
| Cell Death and Survival                                                                                | Cell death                                        | 9.58E-15             | -2.797               | Inhibited        | 482        |
| Cellular Development, Cellular Growth and Proliferation, Embryonic Development, Organismal Development | Proliferation of embryonic stem cells             | 1.18E-03             | 2.728                | Activated        | 11         |
| Cellular Growth and Proliferation                                                                      | Colony formation of cells                         | 2.93E-03             | 2.685                | Activated        | 78         |
| Organismal Survival                                                                                    | Organismal death                                  | 3.32E-03             | -2.641               | Inhibited        | 181        |
| Gene Expression                                                                                        | Repression of RNA                                 | 5.58E-06             | 2.617                | Activated        | 37         |
| Protein Synthesis                                                                                      | Metabolism of protein                             | 1.07E-08             | 2.61                 | Activated        | 87         |
| Cellular Growth and Proliferation                                                                      | Colony formation                                  | 2.82E-03             | 2.535                | Activated        | 86         |
| Cell Morphology, Connective Tissue Development and Function                                            | Shape change of fibroblast cell lines             | 4.20E-03             | 2.53                 | Activated        | 16         |
| Cell Cycle                                                                                             | Mitosis of tumor cell lines                       | 1.28E-03             | 2.377                | Activated        | 25         |
| Cell Death and Survival                                                                                | Necrosis                                          | 9.73E-13             | -2.336               | Inhibited        | 413        |
| Gene Expression                                                                                        | Transactivation                                   | 1.92E-03             | 2.308                | Activated        | 84         |
| Cellular Development, Cellular Growth and Proliferation, Connective Tissue Development and Function    | Proliferation of fibroblast cell lines            | 7.58E-05             | 2.287                | Activated        | 72         |
| RNA Post-Transcriptional Modification                                                                  | Processing of RNA                                 | 8.15E-04             | 2.242                | Activated        | 15         |
| Cellular Assembly and Organization, Cellular Function and Maintenance                                  | Formation of ribosome                             | 3.20E-03             | 2.236                | Activated        | 5          |
| RNA Post-Transcriptional Modification                                                                  | Processing of rRNA                                | 1.08E-04             | 2.219                | Activated        | 7          |
| Gene Expression                                                                                        | Replication of RNA                                | 2.20E-03             | 2.144                | Activated        | 5          |
| Cellular Assembly and Organization, Cellular Function and Maintenance, Tissue Development              | Formation of microtubules                         | 1.06E-03             | -2.137               | Inhibited        | 14         |
| Protein Synthesis                                                                                      | Synthesis of protein                              | 2.76E-10             | 2.085                | Activated        | 70         |
| Cell Cycle                                                                                             | Cell cycle progression of connective tissue cells | 1.11E-03             | 1.982                | Activated        | 12         |
| Molecular Transport, RNA Trafficking                                                                   | Export of RNA                                     | 1.87E-03             | 1.982                | Activated        | 7          |
| Cellular Assembly and Organization, Cellular Function and Maintenance                                  | Organization of microtubules                      | 4.51E-03             | -1.982               | Inhibited        | 9          |
| Cell Cycle                                                                                             | Mitosis of cervical cancer cell lines             | 3.54E-03             | 1.98                 | Activated        | 18         |
| Cell Cycle                                                                                             | G1 phase of breast cancer cell lines              | 3.14E-03             | 1.98                 | Activated        | 11         |
| Gene Expression                                                                                        | Transcription                                     | 5.06E-07             | 1.896                |                  | 141        |
| Cell Cycle                                                                                             | Cell cycle progression                            | 3.60E-06             | 1.882                |                  | 136        |
| Cellular Growth and Proliferation, Connective Tissue Development and Function, Tissue Development      | Colony formation of fibroblast cell lines         | 3.16E-03             | 1.859                |                  | 17         |
| Gene Expression                                                                                        | Expression of RNA                                 | 1.83E-06             | 1.806                |                  | 149        |

|                                                                                                                                            |                                                 |          |        |     |
|--------------------------------------------------------------------------------------------------------------------------------------------|-------------------------------------------------|----------|--------|-----|
| Gene Expression                                                                                                                            | Transactivation of RNA                          | 2.12E-03 | 1.804  | 79  |
| Cell Death and Survival                                                                                                                    | Cell death of colorectal cancer cell lines      | 6.83E-04 | -1.696 | 49  |
| Cellular Development                                                                                                                       | Differentiation of neuroblastoma cell lines     | 2.70E-03 | -1.6   | 11  |
| Cell Cycle                                                                                                                                 | Interphase                                      | 1.73E-07 | 1.573  | 114 |
| Cell Death and Survival                                                                                                                    | Cell death of skin cancer cell lines            | 3.90E-03 | 1.501  | 7   |
| Cell Death and Survival                                                                                                                    | Apoptosis of skin cancer cell lines             | 2.53E-03 | 1.501  | 6   |
| Cell Morphology, Cellular Function and Maintenance, Embryonic Development                                                                  | Autophagy of embryonic cell lines               | 2.78E-03 | 1.477  | 12  |
| Protein Synthesis                                                                                                                          | Production of cytokine                          | 4.81E-03 | 1.451  | 8   |
| Cell Death and Survival                                                                                                                    | Cell death of central nervous system cells      | 2.32E-03 | 1.45   | 46  |
| Cell Death and Survival                                                                                                                    | Apoptosis                                       | 4.66E-09 | -1.445 | 349 |
| Cellular Assembly and Organization, Cellular Function and Maintenance                                                                      | Nucleation of microtubules                      | 7.95E-04 | -1.387 | 8   |
| Cell Cycle                                                                                                                                 | G2/M phase                                      | 2.37E-05 | 1.362  | 37  |
| Molecular Transport, Protein Trafficking                                                                                                   | Import of protein                               | 4.50E-03 | 1.342  | 5   |
| Cell Cycle                                                                                                                                 | Interphase of breast cancer cell lines          | 4.69E-03 | 1.331  | 17  |
| Carbohydrate Metabolism, Molecular Transport, Small Molecule Biochemistry                                                                  | Transport of 2-deoxyglucose                     | 2.13E-03 | 1.309  | 8   |
| Cellular Assembly and Organization                                                                                                         | Quantity of lipid droplets                      | 2.39E-03 | 1.303  | 14  |
| Cell Death and Survival                                                                                                                    | Cell death of cervical cancer cell lines        | 6.12E-09 | 1.302  | 77  |
| Cellular Development, Cellular Growth and Proliferation, Embryonic Development                                                             | Proliferation of embryonic cell lines           | 2.83E-03 | 1.242  | 43  |
| Cellular Assembly and Organization                                                                                                         | Formation of nucleus                            | 4.17E-03 | 1.226  | 12  |
| Gene Expression                                                                                                                            | Transcription of RNA                            | 6.31E-06 | 1.219  | 130 |
| Cell Cycle                                                                                                                                 | G1 phase of tumor cell lines                    | 2.86E-05 | 1.166  | 44  |
| Cell Death and Survival, Renal and Urological System Development and Function                                                              | Cell viability of kidney cell lines             | 1.57E-04 | 1.138  | 18  |
| Cellular Development, Cellular Growth and Proliferation                                                                                    | Cell proliferation of ovarian cancer cell lines | 1.31E-04 | 1.088  | 27  |
| Cell Death and Survival, Embryonic Development                                                                                             | Cell viability of embryonic cell lines          | 6.80E-04 | 1.082  | 21  |
| Cellular Growth and Proliferation, Tissue Development                                                                                      | Proliferation of airway epithelial cells        | 3.94E-04 | 1.076  | 6   |
| DNA Replication, Recombination, and Repair, Energy Production, Nucleic Acid Metabolism, Small Molecule Biochemistry                        | Hydrolysis of ATP                               | 3.50E-03 | 1.066  | 10  |
| Cardiovascular System Development and Function, Organ Development, Organ Morphology, Skeletal and Muscular System Development and Function | Contraction of cardiac muscle                   | 5.32E-03 | -1.066 | 9   |
| Cell Cycle                                                                                                                                 | Interaction of DNA                              | 6.94E-04 | 1.065  | 81  |
| Cell Cycle, Gene Expression                                                                                                                | Binding of DNA                                  | 9.04E-04 | 1.033  | 79  |
| Cell Cycle                                                                                                                                 | Cell division of tumor cell lines               | 3.85E-04 | 1      | 7   |
| Cell Cycle                                                                                                                                 | Interphase of tumor cell lines                  | 4.80E-06 | 0.993  | 72  |
| Cell Death and Survival                                                                                                                    | Cell death of tumor cell lines                  | 7.32E-16 | -0.984 | 290 |
| Cell Death and Survival                                                                                                                    | Apoptosis of hepatoma cell lines                | 4.29E-03 | -0.976 | 26  |
| Cell Cycle                                                                                                                                 | G2/M phase of tumor cell lines                  | 1.75E-03 | 0.97   | 18  |
| Cell Death and Survival                                                                                                                    | Cell death of breast cancer cell lines          | 8.44E-06 | 0.945  | 64  |
| DNA Replication, Recombination, and Repair, Nucleic Acid Metabolism, Small Molecule Biochemistry                                           | Hydrolysis of nucleotide                        | 1.69E-03 | 0.934  | 21  |
| Cell Death and Survival                                                                                                                    | Apoptosis of synovial cells                     | 6.71E-04 | 0.931  | 11  |
| Cell Cycle, Connective Tissue Development and Function                                                                                     | Mitosis of fibroblast cell lines                | 4.45E-04 | 0.915  | 9   |
| Cell Cycle                                                                                                                                 | G1 phase                                        | 2.08E-05 | 0.913  | 66  |
| Cellular Assembly and Organization                                                                                                         | Nucleation of filaments                         | 2.65E-03 | -0.896 | 9   |
| Cardiovascular System Development and Function, Organ Development, Organ Morphology                                                        | Contraction of heart ventricle                  | 2.53E-03 | -0.896 | 6   |
| Cell Death and Survival                                                                                                                    | Apoptosis of cervical cancer cell lines         | 2.74E-05 | 0.891  | 54  |
| Cell Death and Survival                                                                                                                    | Cell death of sarcoma cell lines                | 4.72E-03 | -0.878 | 36  |
| Cellular Development                                                                                                                       | Differentiation of tumor cell lines             | 1.25E-04 | -0.861 | 63  |
| Cellular Movement                                                                                                                          | Invasion of stem cells                          | 1.08E-03 | 0.849  | 4   |
| Cell Morphology, Cellular Function and Maintenance                                                                                         | Autophagy of cells                              | 3.09E-03 | 0.814  | 40  |

|                                                                                                                                                                                                                                                                                                                          |                                              |          |        |     |
|--------------------------------------------------------------------------------------------------------------------------------------------------------------------------------------------------------------------------------------------------------------------------------------------------------------------------|----------------------------------------------|----------|--------|-----|
| Protein Synthesis                                                                                                                                                                                                                                                                                                        | Translation                                  | 1.20E-06 | 0.8    | 31  |
| Cell Morphology, Skeletal and Muscular System Development and Function                                                                                                                                                                                                                                                   | Contraction of muscle cells                  | 3.14E-03 | -0.784 | 11  |
| Cell-To-Cell Signaling and Interaction                                                                                                                                                                                                                                                                                   | Response of splenocytes                      | 4.42E-03 | 0.763  | 6   |
| Cell Death and Survival, Hair and Skin Development and Function                                                                                                                                                                                                                                                          | Cell viability of epithelial cell lines      | 1.47E-03 | 0.757  | 19  |
| Cell Cycle                                                                                                                                                                                                                                                                                                               | Interphase of carcinoma cell lines           | 2.59E-03 | 0.728  | 15  |
| Cell Cycle                                                                                                                                                                                                                                                                                                               | G2 phase                                     | 4.57E-05 | 0.705  | 45  |
| Cellular Movement                                                                                                                                                                                                                                                                                                        | Release of blood cells                       | 1.32E-03 | -0.692 | 6   |
| Cell Death and Survival                                                                                                                                                                                                                                                                                                  | Cell death of hepatoma cell lines            | 1.10E-03 | -0.67  | 31  |
| Cell Cycle                                                                                                                                                                                                                                                                                                               | Cleavage of tumor cell lines                 | 2.55E-04 | 0.64   | 9   |
| Cellular Assembly and Organization                                                                                                                                                                                                                                                                                       | Density of mitochondria                      | 4.50E-03 | 0.607  | 5   |
| Cell Death and Survival                                                                                                                                                                                                                                                                                                  | Apoptosis of tumor cell lines                | 3.07E-10 | -0.577 | 217 |
| Cell Death and Survival                                                                                                                                                                                                                                                                                                  | Apoptosis of embryonic cancer cell lines     | 1.39E-04 | 0.557  | 6   |
| Cell Death and Survival                                                                                                                                                                                                                                                                                                  | Apoptosis of carcinoma cell lines            | 3.53E-03 | 0.517  | 45  |
| Cellular Development, Cellular Growth and Proliferation                                                                                                                                                                                                                                                                  | Cell proliferation of carcinoma cell lines   | 4.19E-03 | 0.493  | 64  |
| Cell-mediated Immune Response, Cellular Development, Cellular Function and Maintenance, Cellular Growth and Proliferation, Embryonic Development, Hematological System Development and Function, Hematopoiesis, Lymphoid Tissue Structure and Development, Organ Development, Organismal Development, Tissue Development | Production of natural killer precursor cells | 2.02E-03 | 0.492  | 4   |
| Cellular Assembly and Organization, Tissue Development                                                                                                                                                                                                                                                                   | Formation of filaments                       | 5.42E-04 | -0.468 | 50  |
| Protein Synthesis                                                                                                                                                                                                                                                                                                        | Expression of protein                        | 3.03E-06 | 0.457  | 42  |
| Cellular Assembly and Organization, Tissue Development                                                                                                                                                                                                                                                                   | Fibrogenesis                                 | 6.60E-04 | -0.406 | 54  |
| Protein Synthesis                                                                                                                                                                                                                                                                                                        | Translation of protein                       | 1.99E-05 | 0.328  | 27  |
| Cell Death and Survival                                                                                                                                                                                                                                                                                                  | Apoptosis of synovial fibroblasts            | 1.06E-03 | 0.29   | 7   |
| Cellular Assembly and Organization                                                                                                                                                                                                                                                                                       | Formation of cytoskeleton                    | 6.86E-04 | -0.289 | 47  |
| Cell Cycle                                                                                                                                                                                                                                                                                                               | Aneuploidy of embryonic cell lines           | 2.02E-03 | 0.254  | 4   |
| Cellular Assembly and Organization                                                                                                                                                                                                                                                                                       | Development of cytoplasm                     | 1.45E-05 | 0.218  | 61  |
| Cellular Movement                                                                                                                                                                                                                                                                                                        | Invasion of stomach cancer cell lines        | 4.42E-03 | 0.218  | 6   |
| Cellular Growth and Proliferation, Hematological System Development and Function                                                                                                                                                                                                                                         | Inhibition of dendritic cells                | 5.34E-03 | 0.218  | 4   |
| Cell-To-Cell Signaling and Interaction, Connective Tissue Development and Function                                                                                                                                                                                                                                       | Activation of fibroblasts                    | 2.98E-03 | -0.205 | 10  |
| Cell Cycle                                                                                                                                                                                                                                                                                                               | G2 phase of tumor cell lines                 | 3.00E-04 | 0.196  | 28  |
| Cellular Movement                                                                                                                                                                                                                                                                                                        | Release of cells                             | 3.98E-03 | -0.168 | 8   |
| Cell Death and Survival                                                                                                                                                                                                                                                                                                  | Cell death of pheochromocytoma cell lines    | 1.15E-03 | 0.16   | 21  |
| Cell Cycle, Embryonic Development                                                                                                                                                                                                                                                                                        | Mitosis of embryonic cell lines              | 1.06E-03 | 0.152  | 7   |
| Behavior                                                                                                                                                                                                                                                                                                                 | Limb clasping                                | 3.20E-03 | 0.152  | 5   |
| Cell Death and Survival                                                                                                                                                                                                                                                                                                  | Cell death of connective tissue cells        | 2.22E-03 | -0.117 | 86  |
| Cell Death and Survival                                                                                                                                                                                                                                                                                                  | Cell death of melanoma cell lines            | 1.53E-05 | 0.107  | 47  |
| Protein Synthesis                                                                                                                                                                                                                                                                                                        | Elongation of protein                        | 3.73E-05 | 0.083  | 4   |
| Cell Death and Survival                                                                                                                                                                                                                                                                                                  | Cell death of bone cancer cell lines         | 3.51E-03 | -0.08  | 30  |
| Cell Death and Survival                                                                                                                                                                                                                                                                                                  | Apoptosis of breast cancer cell lines        | 6.18E-05 | 0.079  | 53  |
| Cell Cycle                                                                                                                                                                                                                                                                                                               | Mitosis                                      | 4.06E-05 | 0.036  | 64  |
| Cellular Development, Cellular Growth and Proliferation                                                                                                                                                                                                                                                                  | Proliferation of lung cancer cell lines      | 2.38E-03 | -0.023 | 44  |
| Cell Cycle                                                                                                                                                                                                                                                                                                               | Arrest in interphase                         | 2.30E-05 |        | 76  |
| Cell Cycle                                                                                                                                                                                                                                                                                                               | Arrest in interphase of tumor cell lines     | 5.10E-04 |        | 48  |
| Cell Cycle                                                                                                                                                                                                                                                                                                               | Arrest in cell cycle progression             | 2.32E-03 |        | 46  |
| Cell Cycle                                                                                                                                                                                                                                                                                                               | Arrest in G1 phase                           | 4.87E-03 |        | 41  |
| Cell Morphology                                                                                                                                                                                                                                                                                                          | Morphology of tumor cell lines               | 4.79E-03 |        | 39  |
| Cell Cycle                                                                                                                                                                                                                                                                                                               | Arrest in G2 phase                           | 1.13E-04 |        | 34  |
| Cell Cycle                                                                                                                                                                                                                                                                                                               | Arrest in G1 phase of tumor cell lines       | 3.46E-03 |        | 29  |

|                                                                                                                                                                                                         |                                                           |          |    |
|---------------------------------------------------------------------------------------------------------------------------------------------------------------------------------------------------------|-----------------------------------------------------------|----------|----|
| Cell Cycle                                                                                                                                                                                              | Arrest in G2/M phase                                      | 6.33E-05 | 21 |
| Cell Cycle                                                                                                                                                                                              | Arrest in G2 phase of tumor cell lines                    | 2.24E-03 | 21 |
| Cell Cycle                                                                                                                                                                                              | Arrest in G2/M phase of tumor cell lines                  | 3.44E-03 | 14 |
| Cell Morphology, Hair and Skin Development and Function                                                                                                                                                 | Morphology of epithelial cell lines                       | 1.60E-03 | 13 |
| Cell Cycle, Embryonic Development                                                                                                                                                                       | Cell cycle progression of embryonic cell lines            | 1.67E-03 | 11 |
| Cell Cycle                                                                                                                                                                                              | Cell cycle progression of bone cancer cell lines          | 2.28E-04 | 11 |
| Cell Cycle, Cell Morphology, Cellular Assembly and Organization, DNA Replication, Recombination, and Repair                                                                                             | Morphology of chromosomes                                 | 1.41E-03 | 11 |
| Cell Cycle                                                                                                                                                                                              | G1 phase of carcinoma cell lines                          | 2.88E-04 | 11 |
| Cell Cycle                                                                                                                                                                                              | Delay in mitosis                                          | 6.25E-05 | 11 |
| Cell Cycle, Connective Tissue Development and Function                                                                                                                                                  | Cell cycle progression of fibroblasts                     | 3.50E-03 | 10 |
| Cellular Development, Cellular Growth and Proliferation, Connective Tissue Development and Function                                                                                                     | Arrest in proliferation of fibroblast cell lines          | 2.52E-03 | 10 |
| Cell Cycle                                                                                                                                                                                              | Delay in cell cycle progression                           | 2.65E-03 | 9  |
| Cell Cycle                                                                                                                                                                                              | Cell cycle progression of cervical cancer cell lines      | 3.81E-03 | 9  |
| Cell Cycle                                                                                                                                                                                              | G1 phase of lung cancer cell lines                        | 3.19E-03 | 9  |
| Cellular Assembly and Organization                                                                                                                                                                      | Regulation of mitochondria                                | 7.95E-04 | 8  |
| Cell Cycle, Connective Tissue Development and Function                                                                                                                                                  | G2 phase of fibroblast cell lines                         | 3.98E-03 | 8  |
| Cell Cycle                                                                                                                                                                                              | Exit from interphase                                      | 1.04E-03 | 8  |
| Cell Cycle                                                                                                                                                                                              | Exit from G1 phase                                        | 3.72E-05 | 7  |
| Cell Cycle                                                                                                                                                                                              | G1 phase of epithelial cells                              | 2.53E-03 | 6  |
| Cell Cycle                                                                                                                                                                                              | Interphase of lung cell lines                             | 4.42E-03 | 6  |
| Cell Cycle                                                                                                                                                                                              | G2/M phase of colorectal cancer cell lines                | 3.20E-03 | 5  |
| Cell Cycle, Embryonic Development                                                                                                                                                                       | G2/M phase of embryonic cell lines                        | 4.50E-03 | 5  |
| Cell Cycle                                                                                                                                                                                              | G1 phase of epidermal cells                               | 5.34E-03 | 4  |
| Nucleic Acid Metabolism, Small Molecule Biochemistry                                                                                                                                                    | Synthesis of nucleoside 5'-phosphate                      | 4.93E-04 | 4  |
| Cell Cycle                                                                                                                                                                                              | Arrest in cleavage of cells                               | 1.08E-03 | 4  |
| Cell Cycle, Connective Tissue Development and Function                                                                                                                                                  | Delay in cell cycle progression of fibroblast cell lines  | 4.93E-04 | 4  |
| Cell Cycle, Skeletal and Muscular System Development and Function                                                                                                                                       | Arrest in cell cycle progression of muscle cells          | 3.42E-03 | 4  |
| Cellular Development, Cellular Growth and Proliferation, Tissue Development                                                                                                                             | Proliferation of bronchial epithelial cells               | 1.08E-03 | 4  |
| Lipid Metabolism, Small Molecule Biochemistry, Vitamin and Mineral Metabolism                                                                                                                           | Catabolism of sterol                                      | 2.02E-03 | 4  |
| Cellular Development                                                                                                                                                                                    | Maturation of oligodendrocyte precursor cells             | 4.93E-04 | 4  |
| Lipid Metabolism, Molecular Transport, Small Molecule Biochemistry                                                                                                                                      | Quantity of ursodeoxycholic acid                          | 4.78E-04 | 3  |
| Organ Morphology, Organismal Development, Reproductive System Development and Function                                                                                                                  | Size of preantral follicle                                | 4.24E-03 | 3  |
| Cell Death and Survival, Cellular Function and Maintenance                                                                                                                                              | Clearance of nontypeable Haemophilus influenzae strain 12 | 1.80E-03 | 3  |
| Cellular Development, Cellular Growth and Proliferation, Embryonic Development, Hematopoiesis, Lymphoid Tissue Structure and Development, Organ Development, Organismal Development, Tissue Development | Development of type 3 innate lymphoid cells               | 1.80E-03 | 3  |
| Cellular Assembly and Organization                                                                                                                                                                      | Binding of chromosomes                                    | 1.80E-03 | 3  |
| Cellular Assembly and Organization                                                                                                                                                                      | Quantity of ribosome                                      | 4.24E-03 | 3  |
| Cell Cycle, Gene Expression                                                                                                                                                                             | Binding of KIF5 binding site                              | 4.78E-04 | 3  |
| Gene Expression                                                                                                                                                                                         | Synthesis of 47s pre-rRNA                                 | 4.78E-04 | 3  |
| DNA Replication, Recombination, and Repair, RNA Post-Transcriptional Modification                                                                                                                       | Annealing of hnRNA                                        | 4.78E-04 | 3  |
| Molecular Transport, Protein Trafficking                                                                                                                                                                | Import of green fluorescent protein                       | 1.80E-03 | 3  |

|                                                                                  |                                                               |          |   |
|----------------------------------------------------------------------------------|---------------------------------------------------------------|----------|---|
| Nucleic Acid Metabolism, Small Molecule Biochemistry                             | Synthesis of ribonucleoside monophosphate                     | 1.80E-03 | 3 |
| Cellular Movement                                                                | Migratory capacity of melanoma cell lines                     | 4.78E-04 | 3 |
| Tissue Morphology                                                                | Quantity of Staphylococcus aureus                             | 1.80E-03 | 3 |
| Tissue Morphology                                                                | Quantity of Salmonella enterica serovar Typhimurium C5 strain | 1.80E-03 | 3 |
| Cell Cycle                                                                       | Arrest in G2/M phase transition of lung cancer cell lines     | 4.24E-03 | 3 |
| Cell Cycle                                                                       | G2/M phase transition of breast cancer cell lines             | 4.24E-03 | 3 |
| Cellular Growth and Proliferation, Hematological System Development and Function | Inhibition of bone marrow-derived dendritic cells             | 4.78E-04 | 3 |

a) The p-value: statistical overlap of differentially expressed gene list and gene set

b) Z-score:  $z > 1.96$  to be significantly activated or increased, and those with  $z < -1.96$  to be significantly inhibited
