# Supplementary material
Source: PubMed Central journal article supplement (PMC6417155)
Supplement: gaz001_schall_et_al._table_s23.pdf [file gaz001_schall_et_al._table_s23.pdf]

Table S23 - IPA canonical pathways of the 8-cell to Morula mega-group

| Canonical Pathways                                      | p-value <sup>a</sup> | Z-score <sup>b</sup> | Activation State | Total DEGs |
|---------------------------------------------------------|----------------------|----------------------|------------------|------------|
| Synaptic Long Term Depression                           | 2.45E-04             | -4.017               | Inhibited        | 30         |
| Actin Cytoskeleton Signaling                            | 3.47E-04             | -3.656               | Inhibited        | 36         |
| Role of NFAT in Cardiac Hypertrophy                     | 2.69E-02             | -3.53                | Inhibited        | 28         |
| G Beta Gamma Signaling                                  | 3.98E-02             | -3.5                 | Inhibited        | 16         |
| Superpathway of Inositol Phosphate Compounds            | 2.63E-03             | -3.43                | Inhibited        | 34         |
| Calcium Signaling                                       | 3.72E-02             | -3.357               | Inhibited        | 26         |
| Pyridoxal 5'-phosphate Salvage Pathway                  | 2.45E-02             | -3.317               | Inhibited        | 11         |
| P2Y Purigenic Receptor Signaling Pathway                | 4.47E-02             | -3.153               | Inhibited        | 18         |
| CREB Signaling in Neurons                               | 1.07E-02             | -3.13                | Inhibited        | 29         |
| 3-phosphoinositide Biosynthesis                         | 9.33E-03             | -3.024               | Inhibited        | 28         |
| Salvage Pathways of Pyrimidine Ribonucleotides          | 9.77E-03             | -3                   | Inhibited        | 16         |
| GPCR-Mediated Nutrient Sensing in Enteroendocrine Cells | 3.47E-02             | -3                   | Inhibited        | 16         |
| Endothelin-1 Signaling                                  | 2.57E-02             | -3                   | Inhibited        | 25         |
| D-myo-inositol (1,4,5)-Trisphosphate Biosynthesis       | 3.24E-04             | -3                   | Inhibited        | 9          |
| Aldosterone Signaling in Epithelial Cells               | 6.03E-03             | -3                   | Inhibited        | 25         |
| Signaling by Rho Family GTPases                         | 2.09E-02             | -2.887               | Inhibited        | 32         |
| D-myo-inositol-5-phosphate Metabolism                   | 6.92E-03             | -2.858               | Inhibited        | 24         |
| Cardiac Hypertrophy Signaling                           | 3.72E-02             | -2.746               | Inhibited        | 29         |
| UVA-Induced MAPK Signaling                              | 1.05E-02             | -2.714               | Inhibited        | 17         |
| Huntington's Disease Signaling                          | 3.02E-02             | -2.673               | Inhibited        | 31         |
| Leukocyte Extravasation Signaling                       | 4.68E-02             | -2.558               | Inhibited        | 26         |
| 3-phosphoinositide Degradation                          | 1.86E-02             | -2.558               | Inhibited        | 22         |
| Phospholipases                                          | 4.17E-02             | -2.53                | Inhibited        | 10         |
| Sphingosine-1-phosphate Signaling                       | 1.23E-02             | -2.5                 | Inhibited        | 19         |
| Notch Signaling                                         | 4.68E-03             | -2.449               | Inhibited        | 9          |
| Thrombin Signaling                                      | 2.00E-02             | -2.236               | Inhibited        | 27         |
| p70S6K Signaling                                        | 5.25E-03             | -2.236               | Inhibited        | 21         |
| 14-3-3-mediated Signaling                               | 4.79E-03             | -2.183               | Inhibited        | 21         |
| FcγRIIB Signaling in B Lymphocytes                      | 4.07E-02             | -2.121               | Inhibited        | 12         |
| ErbB4 Signaling                                         | 4.79E-02             | -2.121               | Inhibited        | 11         |
| D-myo-inositol (3,4,5,6)-tetrakisphosphate Biosynthesis | 4.37E-02             | -2.065               | Inhibited        | 19         |
| D-myo-inositol (1,4,5,6)-Tetrakisphosphate Biosynthesis | 4.37E-02             | -2.065               | Inhibited        | 19         |
| ILK Signaling                                           | 3.80E-02             | -2.041               | Inhibited        | 25         |
| nNOS Signaling in Neurons                               | 4.90E-02             | -2                   | Inhibited        | 8          |
| Neuropathic Pain Signaling In Dorsal Horn Neurons       | 4.27E-02             | -2                   | Inhibited        | 16         |
| RhoGDI Signaling                                        | 6.17E-03             | 1.964                | Activated        | 26         |
| TGF-β Signaling                                         | 3.89E-02             | -1.897               |                  | 13         |
| Leptin Signaling in Obesity                             | 7.24E-03             | -1.89                |                  | 15         |
| Dopamine-DARPP32 Feedback in cAMP Signaling             | 1.02E-03             | -1.706               |                  | 27         |
| Osteoarthritis Pathway                                  | 4.90E-02             | -1.633               |                  | 26         |
| Gα12/13 Signaling                                       | 2.63E-02             | -1.606               |                  | 19         |
| CXCR4 Signaling                                         | 9.33E-03             | -1.528               |                  | 24         |
| PAK Signaling                                           | 2.75E-03             | -1.5                 |                  | 18         |
| p38 MAPK Signaling                                      | 3.24E-02             | -1.5                 |                  | 17         |
| Cardiac β-adrenergic Signaling                          | 1.10E-02             | -1.387               |                  | 21         |
| Superpathway of Citrulline Metabolism                   | 7.24E-03             | -1.342               |                  | 5          |
| ATM Signaling                                           | 2.29E-02             | -1.069               |                  | 15         |
| HIPPO signaling                                         | 1.29E-03             | -1                   |                  | 17         |
| Regulation of Actin-based Motility by Rho               | 2.40E-02             | -0.832               |                  | 14         |
| p53 Signaling                                           | 2.14E-04             | 0.688                |                  | 22         |

|                                                              |          |        |    |
|--------------------------------------------------------------|----------|--------|----|
| Mitotic Roles of Polo-Like Kinase                            | 2.69E-02 | 0.447  | 11 |
| Protein Kinase A Signaling                                   | 1.78E-06 | 0.289  | 64 |
| RhoA Signaling                                               | 2.19E-05 | -0.209 | 26 |
| Protein Ubiquitination Pathway                               | 9.12E-04 |        | 39 |
| Cellular Effects of Sildenafil (Viagra)                      | 4.79E-03 |        | 21 |
| DNA Double-Strand Break Repair by Non-Homologous End Joining | 5.25E-03 |        | 5  |
| Axonal Guidance Signaling                                    | 5.25E-03 |        | 56 |
| Arginine Degradation VI (Arginase 2 Pathway)                 | 1.10E-02 |        | 3  |
| Gap Junction Signaling                                       | 1.15E-02 |        | 27 |
| VDR/RXR Activation                                           | 1.74E-02 |        | 13 |
| Ceramide Degradation                                         | 1.78E-02 |        | 3  |
| Breast Cancer Regulation by Stathmin1                        | 2.09E-02 |        | 27 |
| Hepatic Fibrosis / Hepatic Stellate Cell Activation          | 2.19E-02 |        | 25 |
| Netrin Signaling                                             | 2.45E-02 |        | 11 |
| Tight Junction Signaling                                     | 3.47E-02 |        | 22 |
| Telomere Extension by Telomerase                             | 3.63E-02 |        | 4  |
| Sphingosine and Sphingosine-1-phosphate Metabolism           | 3.72E-02 |        | 3  |
| Citrulline Biosynthesis                                      | 3.72E-02 |        | 3  |
| Arginine Degradation I (Arginase Pathway)                    | 4.07E-02 |        | 2  |
| Mitochondrial Dysfunction                                    | 4.37E-02 |        | 22 |
| RAR Activation                                               | 4.37E-02 |        | 24 |
| Adipogenesis pathway                                         | 4.47E-02 |        | 18 |

a) The p-value: statistical overlap of differentially expressed gene list and gene set

b) Z-score:  $z > 1.96$  to be significantly activated or increased, and those with  $z < -1.96$  to be significantly inhibited
