# Supplementary material
Source: PubMed Central journal article supplement (PMC6417155)
Supplement: gaz001_schall_et_al._table_s24.pdf [file gaz001_schall_et_al._table_s24.pdf]

Table S24 - IPA biological functions of the Morula to Blast mega-group

| Categories                                                                                                                                                                                                                           | Functions Annotation                    | p-value <sup>a</sup> | Z-score <sup>b</sup> | Activation State | Total DEGs |
|--------------------------------------------------------------------------------------------------------------------------------------------------------------------------------------------------------------------------------------|-----------------------------------------|----------------------|----------------------|------------------|------------|
| Organismal Survival                                                                                                                                                                                                                  | Organismal death                        | 1.09E-03             | -4.876               | Inhibited        | 81         |
| Cell Death and Survival                                                                                                                                                                                                              | Cell death                              | 1.53E-04             | -3.864               | Inhibited        | 175        |
| Cell Morphology, Cellular Assembly and Organization, Cellular Function and Maintenance                                                                                                                                               | Formation of cellular protrusions       | 6.51E-06             | 3.74                 | Activated        | 51         |
| Cellular Assembly and Organization, Cellular Function and Maintenance                                                                                                                                                                | Microtubule dynamics                    | 3.84E-07             | 3.717                | Activated        | 70         |
| Cell Death and Survival                                                                                                                                                                                                              | Necrosis                                | 8.47E-04             | -3.705               | Inhibited        | 148        |
| Cellular Assembly and Organization, Cellular Function and Maintenance                                                                                                                                                                | Organization of cytoskeleton            | 5.77E-07             | 3.665                | Activated        | 74         |
| Lipid Metabolism, Molecular Transport, Small Molecule Biochemistry                                                                                                                                                                   | Quantity of steroid                     | 3.09E-03             | 3.118                | Activated        | 25         |
| Cell Death and Survival                                                                                                                                                                                                              | Apoptosis                               | 3.22E-05             | -3.017               | Inhibited        | 140        |
| Lipid Metabolism, Molecular Transport, Small Molecule Biochemistry                                                                                                                                                                   | Concentration of sterol                 | 1.69E-03             | 2.78                 | Activated        | 18         |
| Cell Morphology                                                                                                                                                                                                                      | Sprouting                               | 6.19E-04             | 2.745                | Activated        | 30         |
| Cellular Assembly and Organization, Cellular Function and Maintenance                                                                                                                                                                | Organization of actin cytoskeleton      | 9.18E-04             | 2.728                | Activated        | 13         |
| Lipid Metabolism, Molecular Transport, Small Molecule Biochemistry                                                                                                                                                                   | Concentration of lipid                  | 9.17E-04             | 2.716                | Activated        | 46         |
| Cell Morphology, Cellular Development                                                                                                                                                                                                | Branching of cells                      | 4.37E-04             | 2.714                | Activated        | 30         |
| Cellular Growth and Proliferation                                                                                                                                                                                                    | Outgrowth of cells                      | 1.66E-03             | 2.658                | Activated        | 30         |
| Carbohydrate Metabolism, Small Molecule Biochemistry                                                                                                                                                                                 | Synthesis of D-glucose                  | 2.84E-03             | 2.633                | Activated        | 9          |
| Cellular Development, Cellular Growth and Proliferation, Nervous System Development and Function, Tissue Development                                                                                                                 | Outgrowth of neurites                   | 3.23E-03             | 2.591                | Activated        | 27         |
| Tissue Morphology                                                                                                                                                                                                                    | Quantity of cells                       | 1.61E-05             | 2.554                | Activated        | 94         |
| Cell Morphology, Cellular Assembly and Organization, Cellular Function and Maintenance                                                                                                                                               | Reorganization of actin cytoskeleton    | 7.06E-05             | 2.538                | Activated        | 12         |
| Cellular Movement                                                                                                                                                                                                                    | Cell movement of lung cancer cell lines | 1.13E-04             | 2.518                | Activated        | 15         |
| Cellular Movement                                                                                                                                                                                                                    | Cell movement                           | 7.69E-10             | 2.431                | Activated        | 145        |
| Cell Morphology, Cellular Assembly and Organization, Cellular Development, Cellular Function and Maintenance, Cellular Growth and Proliferation, Nervous System Development and Function, Organismal Development, Tissue Development | Branching of neurons                    | 1.91E-03             | 2.383                | Activated        | 23         |
| Cellular Movement                                                                                                                                                                                                                    | Migration of lung cancer cell lines     | 1.97E-04             | 2.359                | Activated        | 13         |
| Cell-To-Cell Signaling and Interaction                                                                                                                                                                                               | Interaction of tumor cell lines         | 8.14E-07             | 2.335                | Activated        | 39         |
| Cellular Assembly and Organization, Cellular Function and Maintenance                                                                                                                                                                | Quantity of cellular protrusions        | 1.59E-03             | 2.295                | Activated        | 14         |
| Cellular Development, Cellular Growth and Proliferation                                                                                                                                                                              | Cell proliferation of tumor cell lines  | 3.14E-04             | 2.269                | Activated        | 105        |
| Connective Tissue Development and Function, Tissue Morphology                                                                                                                                                                        | Quantity of connective tissue cells     | 3.03E-05             | 2.237                | Activated        | 19         |
| Molecular Transport                                                                                                                                                                                                                  | Transport of molecule                   | 7.75E-05             | 2.212                | Activated        | 55         |
| Cellular Movement                                                                                                                                                                                                                    | Migration of cells                      | 2.99E-08             | 2.198                | Activated        | 127        |
| Cellular Movement                                                                                                                                                                                                                    | Cell movement of sarcoma cell lines     | 3.01E-04             | 2.198                | Activated        | 12         |
| Cell Morphology, Cellular Assembly and Organization, Cellular Function and Maintenance                                                                                                                                               | Reorganization of cytoskeleton          | 6.39E-04             | 2.139                | Activated        | 15         |
| Cell-To-Cell Signaling and Interaction                                                                                                                                                                                               | Binding of tumor cell lines             | 2.35E-06             | 2.118                | Activated        | 37         |
| Cellular Movement                                                                                                                                                                                                                    | Chemotaxis                              | 2.67E-05             | 2.093                | Activated        | 37         |
| Lipid Metabolism, Molecular Transport, Small Molecule Biochemistry                                                                                                                                                                   | Accumulation of lipid                   | 3.15E-03             | -2.031               | Inhibited        | 23         |
| Cell Death and Survival                                                                                                                                                                                                              | Cell death of connective tissue cells   | 1.61E-03             | -1.969               | Inhibited        | 40         |

|                                                                                                                                                                                                                                                             |                                                 |          |        |           |    |
|-------------------------------------------------------------------------------------------------------------------------------------------------------------------------------------------------------------------------------------------------------------|-------------------------------------------------|----------|--------|-----------|----|
| Carbohydrate Metabolism, Molecular Transport                                                                                                                                                                                                                | Quantity of glycogen                            | 5.28E-04 | -1.969 | Inhibited | 8  |
| Cell Death and Survival                                                                                                                                                                                                                                     | Anoikis of carcinoma cell lines                 | 1.12E-03 | -1.964 | Inhibited | 4  |
| Cell-To-Cell Signaling and Interaction                                                                                                                                                                                                                      | Adhesion of neuroglia                           | 4.72E-04 | 1.934  |           | 4  |
| Cellular Development, Cellular Growth and Proliferation                                                                                                                                                                                                     | Cell proliferation of ovarian cancer cell lines | 7.85E-06 | 1.925  |           | 17 |
| Cellular Assembly and Organization, Lipid Metabolism, Small Molecule Biochemistry                                                                                                                                                                           | Accumulation of lipid droplets                  | 4.46E-05 | -1.91  |           | 8  |
| Organ Morphology, Skeletal and Muscular System Development and Function, Tissue Morphology                                                                                                                                                                  | Quantity of muscle cells                        | 1.38E-03 | 1.905  |           | 10 |
| Cellular Movement, Skeletal and Muscular System Development and Function                                                                                                                                                                                    | Migration of smooth muscle cells                | 1.04E-03 | 1.894  |           | 14 |
| Cell Morphology, Cellular Assembly and Organization, Cellular Development, Cellular Function and Maintenance, Cellular Growth and Proliferation, Embryonic Development, Nervous System Development and Function, Organismal Development, Tissue Development | Branching of axons                              | 1.83E-03 | 1.877  |           | 9  |
| Cell-To-Cell Signaling and Interaction, Connective Tissue Development and Function                                                                                                                                                                          | Binding of fibroblast cell lines                | 8.93E-04 | 1.87   |           | 11 |
| Embryonic Development, Organ Development, Organismal Development, Reproductive System Development and Function, Tissue Development                                                                                                                          | Formation of mammary gland                      | 5.25E-04 | 1.842  |           | 14 |
| Cellular Movement                                                                                                                                                                                                                                           | Cell movement of tumor cell lines               | 2.50E-06 | 1.837  |           | 74 |
| Cellular Development, Cellular Growth and Proliferation                                                                                                                                                                                                     | Cell proliferation of bone cancer cell lines    | 1.50E-04 | 1.794  |           | 14 |
| Cardiovascular System Development and Function, Cellular Movement                                                                                                                                                                                           | Migration of endothelial cells                  | 7.32E-05 | 1.748  |           | 26 |
| Cellular Movement                                                                                                                                                                                                                                           | Cell movement of hepatoma cell lines            | 1.03E-03 | 1.742  |           | 11 |
| Cell-To-Cell Signaling and Interaction                                                                                                                                                                                                                      | Binding of breast cancer cell lines             | 3.53E-05 | 1.71   |           | 12 |
| Hematological System Development and Function, Tissue Morphology                                                                                                                                                                                            | Quantity of leukocytes                          | 3.08E-03 | 1.685  |           | 44 |
| Cellular Movement                                                                                                                                                                                                                                           | Cell movement of fibrosarcoma cell lines        | 2.01E-04 | 1.664  |           | 8  |
| Skeletal and Muscular System Development and Function                                                                                                                                                                                                       | Quantity of muscle                              | 9.58E-04 | 1.597  |           | 11 |
| Cellular Movement, Skeletal and Muscular System Development and Function                                                                                                                                                                                    | Cell movement of vascular smooth muscle cells   | 8.12E-04 | 1.578  |           | 12 |
| Cell Death and Survival, Nervous System Development and Function                                                                                                                                                                                            | Cell viability of neuroglia                     | 1.42E-03 | 1.552  |           | 7  |
| Cell Death and Survival                                                                                                                                                                                                                                     | Anoikis                                         | 1.74E-03 | -1.533 |           | 11 |
| Cellular Movement                                                                                                                                                                                                                                           | Invasion of tumor cell lines                    | 3.89E-06 | 1.446  |           | 60 |
| Cellular Assembly and Organization, Cellular Function and Maintenance, Nervous System Development and Function, Tissue Morphology                                                                                                                           | Quantity of neurites                            | 4.96E-04 | 1.42   |           | 10 |
| Skeletal and Muscular System Development and Function                                                                                                                                                                                                       | Quantity of bone                                | 2.44E-04 | 1.418  |           | 14 |
| Connective Tissue Development and Function, Skeletal and Muscular System Development and Function, Tissue Morphology                                                                                                                                        | Quantity of osteoclasts                         | 1.57E-03 | 1.408  |           | 9  |
| Cellular Movement                                                                                                                                                                                                                                           | Migration of fibrosarcoma cell lines            | 2.76E-03 | 1.387  |           | 6  |
| Lipid Metabolism, Small Molecule Biochemistry                                                                                                                                                                                                               | Binding of phospholipid                         | 1.14E-03 | 1.387  |           | 5  |
| Cellular Growth and Proliferation, Hair and Skin Development and Function                                                                                                                                                                                   | Colony formation of epithelial cell lines       | 1.36E-03 | -1.387 |           | 5  |
| Cell Morphology, Cellular Assembly and Organization, Cellular Development, Cellular Function and Maintenance, Cellular Growth and Proliferation, Nervous System Development and Function, Organismal Development, Tissue Development                        | Axonogenesis                                    | 2.65E-03 | 1.363  |           | 12 |

|                                                                                                                                                                                                      |                                             |          |        |    |
|------------------------------------------------------------------------------------------------------------------------------------------------------------------------------------------------------|---------------------------------------------|----------|--------|----|
| Lipid Metabolism, Molecular Transport, Small Molecule Biochemistry                                                                                                                                   | Quantity of glycosylceramide                | 3.64E-05 | 1.342  | 6  |
| Cell-To-Cell Signaling and Interaction                                                                                                                                                               | Attachment of connective tissue cells       | 3.35E-04 | 1.342  | 5  |
| Cardiovascular System Development and Function, Cellular Movement                                                                                                                                    | Cell movement of endothelial cells          | 3.40E-05 | 1.318  | 29 |
| Cellular Movement                                                                                                                                                                                    | Invasion of cells                           | 1.90E-06 | 1.273  | 73 |
| Connective Tissue Development and Function, Skeletal and Muscular System Development and Function, Tissue Morphology                                                                                 | Quantity of bone cells                      | 1.05E-04 | 1.265  | 13 |
| Cellular Movement                                                                                                                                                                                    | Migration of tumor cell lines               | 2.49E-07 | 1.257  | 67 |
| Organismal Development, Reproductive System Development and Function                                                                                                                                 | Development of reproductive system          | 1.29E-03 | 1.255  | 26 |
| Molecular Transport                                                                                                                                                                                  | Transport of cation                         | 1.59E-03 | 1.203  | 10 |
| Cellular Movement, Immune Cell Trafficking                                                                                                                                                           | Leukocyte migration                         | 1.01E-03 | 1.172  | 56 |
| Cellular Movement, Reproductive System Development and Function                                                                                                                                      | Cell movement of breast cell lines          | 2.38E-04 | 1.154  | 12 |
| Cellular Movement                                                                                                                                                                                    | Migration of prostate cancer cell lines     | 2.94E-06 | 1.152  | 16 |
| Cellular Movement                                                                                                                                                                                    | Cell movement of skin cancer cell lines     | 2.90E-03 | 1.067  | 5  |
| Cellular Movement                                                                                                                                                                                    | Cell movement of epithelial cells           | 1.36E-03 | 1.046  | 14 |
| Cellular Movement                                                                                                                                                                                    | Cell movement of blood cells                | 8.20E-04 | 1.041  | 57 |
| Connective Tissue Development and Function, Skeletal and Muscular System Development and Function, Tissue Morphology                                                                                 | Quantity of osteoblasts                     | 2.76E-04 | 1.026  | 7  |
| Cell-To-Cell Signaling and Interaction                                                                                                                                                               | Adhesion of tumor cell lines                | 4.82E-06 | 1.023  | 30 |
| Behavior                                                                                                                                                                                             | Exploratory behavior                        | 3.32E-03 | -1.015 | 5  |
| Organismal Functions, Tissue Morphology                                                                                                                                                              | Healing of epithelial tissue                | 8.59E-04 | 1      | 4  |
| Cell Morphology, Embryonic Development                                                                                                                                                               | Shape change of embryonic cell lines        | 2.20E-03 | 1      | 6  |
| Cell Cycle, Gene Expression                                                                                                                                                                          | Binding of DNA                              | 3.15E-03 | 0.962  | 35 |
| Cell Death and Survival                                                                                                                                                                              | Cell death of sarcoma cell lines            | 1.54E-03 | -0.959 | 19 |
| Cardiovascular System Development and Function                                                                                                                                                       | Development of vasculature                  | 1.44E-04 | 0.956  | 54 |
| Cell Death and Survival                                                                                                                                                                              | Apoptosis of endothelial cell lines         | 2.95E-04 | -0.956 | 8  |
| Cardiovascular System Development and Function, Organismal Development                                                                                                                               | Angiogenesis                                | 9.77E-04 | 0.954  | 49 |
| Cellular Development, Cellular Growth and Proliferation, Embryonic Development, Organ Development, Organismal Development, Skeletal and Muscular System Development and Function, Tissue Development | Formation of muscle cells                   | 3.76E-04 | 0.896  | 13 |
| Cellular Movement, Reproductive System Development and Function                                                                                                                                      | Migration of breast cell lines              | 3.29E-03 | 0.895  | 8  |
| Cell-To-Cell Signaling and Interaction                                                                                                                                                               | Adhesion of breast cancer cell lines        | 6.74E-04 | 0.863  | 9  |
| Cellular Movement                                                                                                                                                                                    | Cell movement of prostate cancer cell lines | 2.06E-06 | 0.839  | 18 |
| Lipid Metabolism, Molecular Transport, Small Molecule Biochemistry                                                                                                                                   | Quantity of cerebroside                     | 5.75E-05 | 0.832  | 5  |
| Cellular Movement                                                                                                                                                                                    | Cell movement of cervical cancer cell lines | 1.53E-03 | -0.801 | 11 |
| Cell Death and Survival                                                                                                                                                                              | Cell death of pericytes                     | 1.60E-03 | -0.776 | 5  |
| Cellular Assembly and Organization                                                                                                                                                                   | Quantity of filaments                       | 8.48E-05 | 0.774  | 15 |
| Cardiovascular System Development and Function, Organismal Development                                                                                                                               | Vasculogenesis                              | 4.96E-04 | 0.766  | 45 |
| Lipid Metabolism, Small Molecule Biochemistry, Vitamin and Mineral Metabolism                                                                                                                        | Steroid metabolism                          | 3.45E-03 | 0.763  | 13 |
| Embryonic Development, Organismal Development                                                                                                                                                        | Development of body trunk                   | 3.67E-04 | 0.734  | 46 |
| Endocrine System Development and Function                                                                                                                                                            | Insulin sensitivity index                   | 3.42E-03 | -0.728 | 6  |
| Lipid Metabolism, Small Molecule Biochemistry, Vitamin and Mineral Metabolism                                                                                                                        | Metabolism of terpenoid                     | 2.22E-03 | 0.721  | 15 |
| Cell Death and Survival                                                                                                                                                                              | Apoptosis of pheochromocytoma cell lines    | 1.98E-03 | -0.693 | 9  |

|                                                                                                                                                                                                                                                                                                        |                                         |          |        |    |
|--------------------------------------------------------------------------------------------------------------------------------------------------------------------------------------------------------------------------------------------------------------------------------------------------------|-----------------------------------------|----------|--------|----|
| Cellular Assembly and Organization                                                                                                                                                                                                                                                                     | Development of cytoplasm                | 2.40E-04 | 0.688  | 28 |
| Cellular Compromise                                                                                                                                                                                                                                                                                    | Calcification of cells                  | 1.79E-03 | 0.686  | 4  |
| Cell-To-Cell Signaling and Interaction, Cellular Assembly and Organization                                                                                                                                                                                                                             | Cell-cell contact                       | 3.67E-05 | 0.658  | 37 |
| Organismal Development                                                                                                                                                                                                                                                                                 | Development of genitourinary system     | 1.50E-03 | 0.651  | 33 |
| Carbohydrate Metabolism                                                                                                                                                                                                                                                                                | Binding of carbohydrate                 | 1.83E-03 | 0.647  | 9  |
| Lipid Metabolism, Molecular Transport, Small Molecule Biochemistry                                                                                                                                                                                                                                     | Quantity of glycosphingolipid           | 2.70E-03 | 0.636  | 10 |
| Nervous System Development and Function, Tissue Morphology                                                                                                                                                                                                                                             | Quantity of neurons                     | 1.42E-03 | 0.617  | 26 |
| Cardiovascular System Development and Function, Hematological System Development and Function                                                                                                                                                                                                          | Blood pressure                          | 1.49E-03 | -0.61  | 17 |
| Cellular Assembly and Organization                                                                                                                                                                                                                                                                     | Formation of cytoskeleton               | 3.97E-04 | 0.602  | 24 |
| Carbohydrate Metabolism                                                                                                                                                                                                                                                                                | Gluconeogenesis                         | 2.03E-04 | 0.6    | 7  |
| Molecular Transport                                                                                                                                                                                                                                                                                    | Transport of Na+                        | 1.88E-03 | -0.6   | 5  |
| Cardiovascular System Development and Function, Cell-To-Cell Signaling and Interaction                                                                                                                                                                                                                 | Binding of endothelial cells            | 9.07E-04 | 0.591  | 17 |
| Cell Death and Survival                                                                                                                                                                                                                                                                                | Cell death of endothelial cell lines    | 9.53E-05 | -0.573 | 9  |
| Cellular Assembly and Organization, Tissue Development                                                                                                                                                                                                                                                 | Formation of filaments                  | 1.03E-03 | 0.56   | 24 |
| Cellular Movement, Hair and Skin Development and Function                                                                                                                                                                                                                                              | Cell movement of epithelial cell lines  | 5.58E-04 | 0.547  | 14 |
| Cardiovascular System Development and Function, Cellular Development, Cellular Growth and Proliferation, Connective Tissue Development and Function, Digestive System Development and Function, Hepatic System Development and Function, Organ Development, Organismal Development, Tissue Development | Proliferation of hepatic stellate cells | 1.14E-03 | 0.522  | 7  |
| Cardiovascular System Development and Function, Cellular Development, Cellular Function and Maintenance, Cellular Growth and Proliferation, Organismal Development, Tissue Development                                                                                                                 | Endothelial cell development            | 5.80E-04 | 0.503  | 24 |
| Cellular Assembly and Organization                                                                                                                                                                                                                                                                     | Accumulation of lysosome                | 2.01E-04 | -0.489 | 5  |
| Embryonic Development                                                                                                                                                                                                                                                                                  | Tubulogenesis                           | 1.14E-03 | -0.378 | 7  |
| Cellular Function and Maintenance                                                                                                                                                                                                                                                                      | Cellular homeostasis                    | 9.74E-04 | 0.354  | 70 |
| Cell-To-Cell Signaling and Interaction, Cellular Assembly and Organization                                                                                                                                                                                                                             | Quantity of actin stress fibers         | 2.47E-04 | 0.342  | 9  |
| Cellular Assembly and Organization                                                                                                                                                                                                                                                                     | Remodeling of actin filaments           | 2.59E-05 | 0.314  | 5  |
| Carbohydrate Metabolism, Molecular Transport, Small Molecule Biochemistry                                                                                                                                                                                                                              | Concentration of D-glucose              | 1.91E-03 | 0.292  | 18 |
| Cellular Development, Cellular Growth and Proliferation, Reproductive System Development and Function                                                                                                                                                                                                  | Cell proliferation of breast cell lines | 1.45E-03 | 0.284  | 13 |
| Cellular Function and Maintenance                                                                                                                                                                                                                                                                      | Engulfment of cells                     | 8.14E-04 | 0.251  | 28 |
| Cellular Movement                                                                                                                                                                                                                                                                                      | Migration of cervical cancer cell lines | 1.83E-03 | -0.229 | 9  |
| Cellular Growth and Proliferation, Nervous System Development and Function, Organ Development                                                                                                                                                                                                          | Proliferation of cerebral cortex cells  | 3.26E-03 | 0.225  | 4  |
| Carbohydrate Metabolism                                                                                                                                                                                                                                                                                | Quantity of carbohydrate                | 2.90E-03 | 0.222  | 29 |
| Cell Death and Survival                                                                                                                                                                                                                                                                                | Cell death of eye cells                 | 3.05E-03 | 0.216  | 8  |
| Digestive System Development and Function                                                                                                                                                                                                                                                              | Development of digestive system         | 1.14E-03 | -0.2   | 17 |

|                                                                                                                                                                                                       |                                               |          |        |    |
|-------------------------------------------------------------------------------------------------------------------------------------------------------------------------------------------------------|-----------------------------------------------|----------|--------|----|
| Cardiovascular System Development and Function, Cellular Development, Cellular Function and Maintenance, Cellular Growth and Proliferation, Organismal Development, Tissue Development                | Proliferation of endothelial cells            | 9.39E-04 | 0.167  | 21 |
| Cellular Assembly and Organization, Tissue Development                                                                                                                                                | Fibrogenesis                                  | 1.85E-04 | 0.116  | 28 |
| Hematological System Development and Function, Tissue Morphology                                                                                                                                      | Quantity of myeloid cells                     | 2.76E-03 | 0.11   | 25 |
| Cardiovascular System Development and Function, Cell-To-Cell Signaling and Interaction                                                                                                                | Binding of vascular endothelial cells         | 2.02E-03 | 0.106  | 12 |
| Cellular Movement                                                                                                                                                                                     | Cell movement of dermal cells                 | 3.06E-03 | -0.103 | 10 |
| Cardiovascular System Development and Function, Cellular Development, Cellular Growth and Proliferation, Organ Development, Skeletal and Muscular System Development and Function, Tissue Development | Proliferation of vascular smooth muscle cells | 3.62E-03 | 0.086  | 13 |
| Cell-To-Cell Signaling and Interaction, Cellular Assembly and Organization, Skeletal and Muscular System Development and Function                                                                     | Fusion of muscle cell lines                   | 2.36E-04 | -0.059 | 6  |
| Molecular Transport                                                                                                                                                                                   | Transport of metal                            | 1.23E-03 | -0.04  | 14 |
| Behavior                                                                                                                                                                                              | Behavior                                      | 4.25E-04 | -0.033 | 40 |
| Cellular Assembly and Organization                                                                                                                                                                    | Quantity of actin filaments                   | 1.76E-04 | 0      | 10 |
| Cell Death and Survival                                                                                                                                                                               | Cell death of heart cell lines                | 2.47E-03 |        | 6  |
| Cardiovascular System Development and Function                                                                                                                                                        | Morphology of cardiovascular system           | 1.68E-04 |        | 34 |
| Skeletal and Muscular System Development and Function                                                                                                                                                 | Morphology of muscle                          | 1.15E-03 |        | 23 |
| Cellular Movement                                                                                                                                                                                     | Dissemination of prostate cancer cell lines   | 5.10E-04 |        | 3  |
| Cellular Assembly and Organization                                                                                                                                                                    | Quantity of macropinosomes                    | 1.37E-03 |        | 3  |
| Cardiovascular System Development and Function                                                                                                                                                        | Morphology of vessel                          | 1.96E-03 |        | 11 |
| Digestive System Development and Function                                                                                                                                                             | Morphology of digestive system                | 9.11E-04 |        | 20 |
| Cardiovascular System Development and Function, Tissue Morphology                                                                                                                                     | Morphology of blood vessel                    | 1.70E-03 |        | 10 |
| Embryonic Development, Organismal Development, Tissue Morphology                                                                                                                                      | Morphology of visceral endoderm               | 2.61E-04 |        | 3  |
| Cell Morphology, Organ Morphology, Skeletal and Muscular System Development and Function, Tissue Morphology                                                                                           | Area of muscle cells                          | 1.14E-03 |        | 5  |
| Cardiovascular System Development and Function, Cell Morphology, Skeletal and Muscular System Development and Function                                                                                | Relengthening of cardiomyocytes               | 9.09E-04 |        | 2  |
| Molecular Transport                                                                                                                                                                                   | Quantity of urea                              | 5.27E-04 |        | 5  |
| Cellular Movement                                                                                                                                                                                     | Invasion of myeloma cell lines                | 2.67E-03 |        | 2  |
| Cellular Growth and Proliferation, Connective Tissue Development and Function                                                                                                                         | Proliferation of stromal cell lines           | 2.67E-03 |        | 2  |
| Cell-To-Cell Signaling and Interaction, Cellular Assembly and Organization, Cellular Function and Maintenance, Nervous System Development and Function, Tissue Development                            | Function of synapse                           | 1.43E-03 |        | 4  |
| Organismal Development                                                                                                                                                                                | Morphology of body cavity                     | 7.06E-05 |        | 50 |
| Cellular Assembly and Organization, Tissue Development                                                                                                                                                | Formation of membrane tubule                  | 1.37E-03 |        | 3  |
| Cell Morphology, Reproductive System Development and Function                                                                                                                                         | Whole-cell conductance of oocytes             | 2.61E-04 |        | 3  |
| Lipid Metabolism, Small Molecule Biochemistry                                                                                                                                                         | Recruitment of phospholipid                   | 2.67E-03 |        | 2  |
| Behavior                                                                                                                                                                                              | Active avoidance response                     | 2.67E-03 |        | 2  |

|                                                                                                                                                         |                                                                                    |          |    |
|---------------------------------------------------------------------------------------------------------------------------------------------------------|------------------------------------------------------------------------------------|----------|----|
| Tissue Morphology                                                                                                                                       | Density of microglia                                                               | 1.07E-04 | 3  |
| Tissue Morphology                                                                                                                                       | Density of macrophages                                                             | 5.21E-05 | 4  |
| Connective Tissue Development and Function, Skeletal and Muscular System Development and Function, Tissue Development, Tissue Morphology                | Size of medullary cavity                                                           | 2.67E-03 | 2  |
| Digestive System Development and Function, Organ Morphology, Organismal Development                                                                     | Morphology of pancreas                                                             | 1.87E-03 | 8  |
| Cell Morphology                                                                                                                                         | Size of cells                                                                      | 6.16E-04 | 32 |
| Lipid Metabolism, Molecular Transport, Small Molecule Biochemistry                                                                                      | Quantity of glucosylceramide                                                       | 2.00E-03 | 3  |
| Cardiovascular System Development and Function, Organ Morphology, Organismal Development                                                                | Morphology of heart                                                                | 1.08E-03 | 28 |
| Digestive System Development and Function, Organ Morphology, Organismal Development                                                                     | Size of pancreas                                                                   | 3.42E-03 | 6  |
| Cell Morphology, Cellular Assembly and Organization                                                                                                     | Size of lysosome                                                                   | 2.80E-03 | 3  |
| Cell Morphology, Organ Morphology, Skeletal and Muscular System Development and Function, Tissue Morphology                                             | Morphology of muscle cells                                                         | 1.89E-03 | 20 |
| Cell-To-Cell Signaling and Interaction, Skeletal and Muscular System Development and Function                                                           | Adhesion of smooth muscle cells                                                    | 8.59E-04 | 4  |
| Cell Morphology                                                                                                                                         | Shape change of endothelial cell lines                                             | 4.23E-04 | 5  |
| Digestive System Development and Function, Embryonic Development, Organ Development, Organismal Development                                             | Tooth development                                                                  | 1.87E-03 | 8  |
| Cell Morphology                                                                                                                                         | Morphology of prostate cell lines                                                  | 1.37E-03 | 3  |
| Cell Morphology                                                                                                                                         | Area of cells                                                                      | 4.87E-05 | 11 |
| Cell Morphology                                                                                                                                         | Enlargement of cells                                                               | 3.84E-06 | 31 |
| Cell Cycle                                                                                                                                              | Cell division of tumor cell lines                                                  | 2.22E-03 | 4  |
| Cellular Movement                                                                                                                                       | Haptotaxis of prostate cancer cell lines                                           | 9.09E-04 | 2  |
| Amino Acid Metabolism, Molecular Transport, Small Molecule Biochemistry                                                                                 | Exchange of L-glutamic acid                                                        | 2.67E-03 | 2  |
| Amino Acid Metabolism, Molecular Transport, Small Molecule Biochemistry                                                                                 | Exchange of L-aspartic acid                                                        | 2.67E-03 | 2  |
| Cell Morphology, Cellular Movement                                                                                                                      | Cell spreading of prostate cancer cell lines                                       | 2.61E-04 | 3  |
| Embryonic Development, Tissue Morphology                                                                                                                | Structural integrity of Reichert's membrane                                        | 9.09E-04 | 2  |
| Cell Cycle                                                                                                                                              | Delay in initiation of metaphase/anaphase transition of cervical cancer cell lines | 2.67E-03 | 2  |
| Cell Cycle                                                                                                                                              | Arrest in cell cycle progression of neuroblastoma cell lines                       | 2.67E-03 | 2  |
| Embryonic Development, Organismal Development, Skeletal and Muscular System Development and Function, Tissue Development                                | Delay in ossification of embryonic tissue                                          | 9.09E-04 | 2  |
| Carbohydrate Metabolism, Lipid Metabolism, Molecular Transport, Small Molecule Biochemistry                                                             | Secretion of lysophosphatidic acid                                                 | 2.67E-03 | 2  |
| Cellular Movement, Hematological System Development and Function                                                                                        | Leukostasis                                                                        | 2.61E-04 | 3  |
| Digestive System Development and Function, Hepatic System Development and Function, Organ Morphology, Organismal Development                            | Mass of liver                                                                      | 4.72E-04 | 8  |
| Cell Morphology, Cell-To-Cell Signaling and Interaction, Cellular Assembly and Organization, Nervous System Development and Function, Tissue Morphology | Structure of synapse                                                               | 9.09E-04 | 2  |
| Cell Morphology, Cellular Movement                                                                                                                      | Cell spreading of lung cell lines                                                  | 2.67E-03 | 2  |

|                                                                                                                                                                         |                                                  |          |   |
|-------------------------------------------------------------------------------------------------------------------------------------------------------------------------|--------------------------------------------------|----------|---|
| Cell-To-Cell Signaling and Interaction, Cellular Growth and Proliferation, Hematological System Development and Function, Nervous System Development and Function       | Stimulation of microglia                         | 2.67E-03 | 2 |
| Cell-To-Cell Signaling and Interaction, Skeletal and Muscular System Development and Function                                                                           | Binding of smooth muscle cells                   | 5.67E-04 | 6 |
| Cellular Function and Maintenance, Cellular Movement, Hematological System Development and Function, Immune Cell Trafficking, Lymphoid Tissue Structure and Development | Stasis of leukocytes                             | 5.10E-04 | 3 |
| Cell Death and Survival                                                                                                                                                 | Antiapoptosis of stomach cancer cell lines       | 2.67E-03 | 2 |
| Cell-To-Cell Signaling and Interaction, Nervous System Development and Function                                                                                         | Synaptic transmission of muscle                  | 2.67E-03 | 2 |
| Carbohydrate Metabolism, Molecular Transport, Small Molecule Biochemistry                                                                                               | Cycling of D-glucose                             | 9.09E-04 | 2 |
| Cell Morphology, Connective Tissue Development and Function                                                                                                             | Mineralization of fibroblast cell lines          | 1.37E-03 | 3 |
| Lipid Metabolism, Molecular Transport, Small Molecule Biochemistry                                                                                                      | Quantity of ganglioside GM3                      | 1.43E-03 | 4 |
| Connective Tissue Development and Function, Tissue Development                                                                                                          | Formation of adipose tissue                      | 2.67E-03 | 2 |
| Cell Morphology, Cellular Movement                                                                                                                                      | Cell spreading of bone cancer cell lines         | 2.00E-03 | 3 |
| Cell Cycle, Cellular Assembly and Organization, DNA Replication, Recombination, and Repair                                                                              | Opening of chromatin                             | 2.67E-03 | 2 |
| Nervous System Development and Function, Organ Morphology, Organismal Development                                                                                       | Volume of brain                                  | 3.26E-03 | 4 |
| Cell Morphology, Cellular Movement                                                                                                                                      | Cell spreading of keratinocyte cancer cell lines | 2.67E-03 | 2 |
| Carbohydrate Metabolism, Molecular Transport, Nucleic Acid Metabolism, Small Molecule Biochemistry                                                                      | Quantity of UDP-D-glucose                        | 2.67E-03 | 2 |
| Tissue Morphology                                                                                                                                                       | Structural integrity of basement membrane        | 2.67E-03 | 2 |

a) The p-value: statistical overlap of differentially expressed gene list and gene set

b) Z-score:  $z > 1.96$  to be significantly activated or increased, and those with  $z < -1.96$  to be significantly inhibited
