# Supplementary material
Source: PubMed Central journal article supplement (PMC6417155)
Supplement: gaz001_schall_et_al._table_s25.pdf [file gaz001_schall_et_al._table_s25.pdf]

Table S25 - IPA canonical pathways of the Morula to Blast mega-group

| Canonical Pathways                                                        | p-value <sup>a</sup> | Z-score <sup>b</sup> | Activation State | Total DEGs |
|---------------------------------------------------------------------------|----------------------|----------------------|------------------|------------|
| Superpathway of Cholesterol Biosynthesis                                  | 1.35E-03             | 2.236                | Activated        | 5          |
| RhoGDI Signaling                                                          | 4.27E-02             | -2.121               | Inhibited        | 10         |
| GP6 Signaling Pathway                                                     | 2.51E-03             | 2.111                | Activated        | 11         |
| PPAR $\alpha$ /RXR $\alpha$ Activation                                    | 4.68E-02             | -1.265               |                  | 10         |
| Osteoarthritis Pathway                                                    | 8.13E-05             | 1.213                |                  | 18         |
| Hepatic Fibrosis / Hepatic Stellate Cell Activation                       | 1.66E-03             |                      |                  | 14         |
| Cholesterol Biosynthesis I                                                | 6.17E-03             |                      |                  | 3          |
| Cholesterol Biosynthesis II (via 24,25-dihydrocholesterol)                | 6.17E-03             |                      |                  | 3          |
| Cholesterol Biosynthesis III (via Desmosterol)                            | 6.17E-03             |                      |                  | 3          |
| Glutamate Receptor Signaling                                              | 7.24E-03             |                      |                  | 6          |
| $\gamma$ -glutamyl Cycle                                                  | 7.76E-03             |                      |                  | 3          |
| Zymosterol Biosynthesis                                                   | 1.26E-02             |                      |                  | 2          |
| Cardiomyocyte Differentiation via BMP Receptors                           | 2.14E-02             |                      |                  | 3          |
| Inflammasome pathway                                                      | 2.14E-02             |                      |                  | 3          |
| Sphingomyelin Metabolism                                                  | 2.24E-02             |                      |                  | 2          |
| Role of Osteoblasts, Osteoclasts and Chondrocytes in Rheumatoid Arthritis | 2.51E-02             |                      |                  | 13         |
| Fatty Acid $\alpha$ -oxidation                                            | 2.75E-02             |                      |                  | 3          |
| Human Embryonic Stem Cell Pluripotency                                    | 2.95E-02             |                      |                  | 9          |
| Thio-molybdenum Cofactor Biosynthesis                                     | 3.02E-02             |                      |                  | 1          |
| UDP-N-acetyl-D-galactosamine Biosynthesis I                               | 3.02E-02             |                      |                  | 1          |
| CDP-diacylglycerol Biosynthesis I                                         | 3.47E-02             |                      |                  | 3          |
| autophagy                                                                 | 3.89E-02             |                      |                  | 5          |
| UDP-N-acetyl-D-galactosamine Biosynthesis II                              | 4.17E-02             |                      |                  | 2          |
| Phosphatidylglycerol Biosynthesis II (Non-plastidic)                      | 4.27E-02             |                      |                  | 3          |
| Acyl-CoA Hydrolysis                                                       | 4.90E-02             |                      |                  | 2          |

a) The p-value: statistical overlap of differentially expressed gene list and gene set

b) Z-score:  $z > 1.96$  to be significantly activated or increased, and those with  $z < -1.96$  to be significantly inhibited
