# Supplementary material
Source: PubMed Central journal article supplement (PMC6417155)
Supplement: gaz001_schall_et_al._table_s26.pdf [file gaz001_schall_et_al._table_s26.pdf]

Table S26 - Morula Female/Male DEGs

| Gene               | Symbol   | GeneName                                                               | Chromosome | FPKM <sup>a</sup> |       | Exp. Blast        |                  |
|--------------------|----------|------------------------------------------------------------------------|------------|-------------------|-------|-------------------|------------------|
|                    |          |                                                                        |            | Female            | Male  | L2FC <sup>b</sup> | FDR <sup>c</sup> |
| ENSMMUG00000038331 | RPS4Y1   | Ribosomal Protein S4, Y-linked 1                                       | Y          | 8.20              | 89.67 | -7.26             | 2.25E-10         |
| ENSMMUG00000000419 | ARHGAP26 | Rho GTPase Activating Protein 26                                       | 6          | 18.53             | 7.14  | 0.00              | 2.22E-02         |
| ENSMMUG00000000658 | CDHR1    | Cadherin Related Family Member 1                                       | 9          | 0.00              | 0.60  | 0.00              | 2.73E-17         |
| ENSMMUG00000000907 | MAATS1   | MYCBP Associated And Testis Expressed 1                                | 2          | 0.01              | 0.02  | 0.00              | 1.85E-02         |
| ENSMMUG00000000912 | CD86     | CD86 Molecule                                                          | 2          | 0.01              | 0.05  | 0.00              | 2.78E-05         |
| ENSMMUG00000000971 | TTL9     | Tubulin Tyrosine Ligase Like 9                                         | 10         | 0.11              | 5.88  | 0.00              | 1.26E-03         |
| ENSMMUG00000001176 | SPART    | Spartin                                                                | 17         | 0.03              | 0.84  | 0.00              | 4.49E-02         |
| ENSMMUG00000001224 | NIM1K    | NIM1 Serine/threonine Protein Kinase                                   | 6          | 0.00              | 0.66  | 0.00              | 6.27E-08         |
| ENSMMUG00000001475 | TMEFF2   | Transmembrane Protein With EGF Like And Two Follistatin Like Domains 2 | 12         | 1.01              | 0.05  | 0.00              | 1.29E-05         |
| ENSMMUG00000001505 | KRT23    | Keratin 23                                                             | 16         | 0.01              | 0.40  | 0.00              | 2.26E-02         |
| ENSMMUG00000001814 | LMCD1    | LIM And Cysteine Rich Domains 1                                        | 2          | 0.24              | 0.00  | 0.00              | 5.30E-07         |
| ENSMMUG00000001827 | PLPPR1   | Phospholipid Phosphatase Related 1                                     | 15         | 0.00              | 0.51  | 0.00              | 5.27E-06         |
| ENSMMUG00000002168 | MARCH10  | Membrane Associated Ring-CH-type Finger 10                             | 16         | 0.00              | 0.21  | 0.00              | 5.71E-09         |
| ENSMMUG00000002488 |          |                                                                        | 6          | 0.07              | 0.37  | 0.00              | 1.06E-03         |
| ENSMMUG00000002636 |          |                                                                        | 16         | 0.00              | 0.20  | 0.00              | 1.01E-02         |
| ENSMMUG00000002866 | LGALS2   | Galectin 2                                                             | 10         | 0.23              | 0.00  | 0.00              | 7.16E-03         |
| ENSMMUG00000002933 | NR1D1    | Nuclear Receptor Subfamily 1 Group D Member 1                          | 16         | 3.61              | 0.25  | 0.00              | 1.83E-03         |
| ENSMMUG00000003071 | MBNL3    | Muscleblind Like Splicing Regulator 3                                  | X          | 0.41              | 0.00  | 0.00              | 6.71E-13         |
| ENSMMUG00000003082 | PAGE4    | PAGE Family Member 4                                                   | X          | 0.00              | 16.22 | 0.00              | 2.55E-08         |
| ENSMMUG00000003673 | PM20D1   | Peptidase M20 Domain Containing 1                                      | 1          | 3.68              | 0.24  | 0.00              | 6.85E-05         |
| ENSMMUG00000004154 | TCEAL5   | Transcription Elongation Factor A Like 5                               | X          | 0.29              | 0.00  | 0.00              | 3.37E-09         |
| ENSMMUG00000004245 |          |                                                                        | 19         | 0.00              | 1.89  | 0.00              | 6.71E-13         |
| ENSMMUG00000004330 | PAMR1    | Peptidase Domain Containing Associated With Muscle Regeneration 1      | 14         | 0.03              | 0.00  | 0.00              | 1.12E-14         |
| ENSMMUG00000004490 | IFI16    | Interferon Gamma Inducible Protein 16                                  | 1          | 0.01              | 0.00  | 0.00              | 1.39E-04         |
| ENSMMUG00000005063 | CDKL5    | Cyclin Dependent Kinase Like 5                                         | X          | 39.26             | 7.14  | 0.00              | 2.01E-02         |
| ENSMMUG00000005093 | KLHL32   | Kelch Like Family Member 32                                            | 4          | 0.04              | 0.00  | 0.00              | 6.46E-06         |
| ENSMMUG00000005440 | ELMOD1   | ELMO Domain Containing 1                                               | 14         | 0.00              | 0.83  | 0.00              | 3.52E-02         |
| ENSMMUG00000006450 | HTATSF1  | HIV-1 Tat Specific Factor 1                                            | X          | 38.80             | 10.00 | 0.00              | 4.81E-02         |
| ENSMMUG00000006619 |          |                                                                        | 1          | 0.00              | 1.25  | 0.00              | 9.19E-06         |
| ENSMMUG00000006670 |          |                                                                        | 17         | 3.83              | 0.00  | 0.00              | 1.52E-06         |
| ENSMMUG00000006766 | RUNDC3B  | RUN Domain Containing 3B                                               | 3          | 1.34              | 0.00  | 0.00              | 3.20E-12         |
| ENSMMUG00000006985 |          |                                                                        | 12         | 0.01              | 1.48  | 0.00              | 3.54E-04         |
| ENSMMUG00000007859 | FMNL1    | Formin Like 1                                                          | 16         | 0.85              | 0.40  | 0.00              | 4.80E-13         |
| ENSMMUG00000008094 |          |                                                                        | 8          | 0.08              | 0.00  | 0.00              | 1.75E-07         |
| ENSMMUG00000008574 | USP50    | Ubiquitin Specific Peptidase 50                                        | 7          | 0.01              | 0.01  | 0.00              | 5.82E-07         |
| ENSMMUG00000008596 | TMEM176B | Transmembrane Protein 176B                                             | 3          | 0.01              | 2.17  | 0.00              | 3.69E-02         |
| ENSMMUG00000008793 | SPP1     | Secreted Phosphoprotein 1                                              | 5          | 0.01              | 0.00  | 0.00              | 4.83E-02         |
| ENSMMUG00000008924 | PLLP     | Plasmolipin                                                            | 20         | 0.03              | 2.68  | 0.00              | 4.69E-02         |
| ENSMMUG00000010682 | FBN2     | Fibrillin 2                                                            | 6          | 0.02              | 0.17  | 0.00              | 2.92E-02         |
| ENSMMUG00000011304 | PSMB9    | Proteasome Subunit Beta 9                                              | 4          | 0.00              | 0.08  | 0.00              | 8.17E-05         |
| ENSMMUG00000011770 | AVL9     | AVL9 Cell Migration Associated                                         | 3          | 0.32              | 1.08  | 0.00              | 9.73E-03         |
| ENSMMUG00000011824 |          |                                                                        | 8          | 0.00              | 0.10  | 0.00              | 4.75E-05         |
| ENSMMUG00000011876 |          |                                                                        | 7          | 0.00              | 0.01  | 0.00              | 3.97E-02         |
| ENSMMUG00000011956 | CAMK1D   | Calcium/calmodulin Dependent Protein Kinase ID                         | 9          | 0.99              | 0.00  | 0.00              | 4.01E-08         |
| ENSMMUG00000012513 | LACTB2   | Lactamase Beta 2                                                       | 8          | 0.00              | 0.37  | 0.00              | 4.10E-08         |
| ENSMMUG00000012650 | BCL7A    | BCL Tumor Suppressor 7A                                                | 11         | 0.03              | 1.81  | 0.00              | 2.92E-02         |
| ENSMMUG00000012838 | OTUD7A   | OTU Deubiquitinase 7A                                                  | 7          | 0.07              | 0.06  | 0.00              | 4.10E-08         |
| ENSMMUG00000013816 |          |                                                                        | 5          | 0.15              | 0.00  | 0.00              | 6.02E-05         |
| ENSMMUG00000013837 | SHISA9   | Shisa Family Member 9                                                  | 20         | 0.00              | 0.03  | 0.00              | 2.42E-04         |

|                    |              |                                                                        |    |       |       |      |          |
|--------------------|--------------|------------------------------------------------------------------------|----|-------|-------|------|----------|
| ENSMMUG00000014670 | PYGL         | Glycogen Phosphorylase L                                               | 7  | 0.34  | 4.06  | 0.00 | 7.27E-03 |
| ENSMMUG00000014718 | SLC8A2       | Solute Carrier Family 8 Member A2                                      | 19 | 0.03  | 0.94  | 0.00 | 3.49E-03 |
| ENSMMUG00000014787 | SLC6A16      | Solute Carrier Family 6 Member 16                                      | 19 | 20.61 | 0.27  | 0.00 | 3.69E-02 |
| ENSMMUG00000015018 | CD5          | CD5 Molecule                                                           | 14 | 0.01  | 0.02  | 0.00 | 3.20E-06 |
| ENSMMUG00000015297 | CD69         | CD69 Molecule                                                          | 11 | 0.00  | 0.08  | 0.00 | 2.14E-09 |
| ENSMMUG00000015320 | KCNQ5        | Potassium Voltage-gated Channel Subfamily Q Member 5                   | 4  | 0.14  | 0.57  | 0.00 | 4.47E-02 |
| ENSMMUG00000016669 | ZNF385A      | Zinc Finger Protein 385A                                               | 11 | 0.00  | 0.18  | 0.00 | 2.28E-15 |
| ENSMMUG00000016802 | CTCF         | CCCTC-binding Factor Like                                              | 10 | 0.17  | 0.28  | 0.00 | 4.94E-03 |
| ENSMMUG00000016984 | PHF7         | PHD Finger Protein 7                                                   | 2  | 0.94  | 6.46  | 0.00 | 1.01E-02 |
| ENSMMUG00000017711 | LZTS1        | Leucine Zipper Tumor Suppressor 1                                      | 8  | 0.00  | 0.00  | 0.00 | 3.94E-06 |
| ENSMMUG00000017783 | LOC100424148 | Uncharacterized Protein CXorf49-like                                   | X  | 1.15  | 0.00  | 0.00 | 2.28E-09 |
| ENSMMUG00000018084 | RSPH1        | Radial Spoke Head 1 Homolog                                            | 3  | 0.00  | 0.34  | 0.00 | 1.84E-05 |
| ENSMMUG00000018090 | GLP2R        | Glucagon Like Peptide 2 Receptor                                       | 16 | 3.77  | 3.16  | 0.00 | 4.93E-02 |
| ENSMMUG00000018584 | NUAK2        | NUAK Family Kinase 2                                                   | 1  | 0.01  | 0.54  | 0.00 | 1.85E-02 |
| ENSMMUG00000018808 | PRAM1        | PML-RARA Regulated Adaptor Molecule 1                                  | 19 | 0.07  | 0.00  | 0.00 | 4.25E-10 |
| ENSMMUG00000019020 | SLC2A7       | Solute Carrier Family 2 Member 7                                       | 1  | 0.00  | 0.00  | 0.00 | 4.24E-02 |
| ENSMMUG00000019031 | GPR4         | G Protein-coupled Receptor 4                                           | 19 | 0.00  | 1.18  | 0.00 | 1.56E-11 |
| ENSMMUG00000020004 | RASSF2       | Ras Association Domain Family Member 2                                 | 10 | 0.00  | 0.04  | 0.00 | 3.58E-05 |
| ENSMMUG00000020405 | PLA2G12B     | Phospholipase A2 Group XIIB                                            | 9  | 0.00  | 0.34  | 0.00 | 2.66E-02 |
| ENSMMUG00000020494 |              |                                                                        | 19 | 0.00  | 0.02  | 0.00 | 9.73E-03 |
| ENSMMUG00000020656 | ACOT12       | Acyl-CoA Thioesterase 12                                               | 6  | 0.00  | 0.13  | 0.00 | 1.52E-06 |
| ENSMMUG00000020776 | PRKCC        | Protein Kinase C Theta                                                 | 9  | 0.00  | 5.36  | 0.00 | 4.45E-04 |
| ENSMMUG00000020826 | LOC710254    | Uncharacterized Protein C12orf76                                       | 11 | 0.40  | 0.00  | 0.00 | 5.79E-13 |
| ENSMMUG00000021783 | IGDCC3       | Immunoglobulin Superfamily DCC Subclass Member 3                       | 7  | 0.00  | 1.19  | 0.00 | 2.31E-05 |
| ENSMMUG00000022133 | CRYAB        | Crystallin Alpha B                                                     | 14 | 0.00  | 0.07  | 0.00 | 3.89E-04 |
| ENSMMUG00000022217 | CBLN1        | Cerebellin 1 Precursor                                                 | 20 | 0.55  | 0.00  | 0.00 | 5.82E-07 |
| ENSMMUG00000022471 |              |                                                                        | 6  | 0.56  | 0.94  | 0.00 | 6.44E-03 |
| ENSMMUG00000022734 | LOC701233    | Type-1 Protein Phosphatase Inhibitor 4                                 | X  | 0.00  | 0.07  | 0.00 | 7.16E-03 |
| ENSMMUG00000022862 | DKK3         | Dickkopf WNT Signaling Pathway Inhibitor 3                             | 14 | 0.00  | 0.00  | 0.00 | 2.78E-05 |
| ENSMMUG00000022996 |              |                                                                        | 13 | 0.00  | 0.46  | 0.00 | 1.21E-12 |
| ENSMMUG00000023194 | FAM221A      | Family With Sequence Similarity 221 Member A                           | 3  | 0.26  | 0.00  | 0.00 | 3.08E-05 |
| ENSMMUG00000027033 | MIR421       | MicroRNA 421                                                           | X  | 4.00  | 0.00  | 0.00 | 3.08E-05 |
| ENSMMUG00000029603 |              |                                                                        | 7  | 0.00  | 0.52  | 0.00 | 2.17E-16 |
| ENSMMUG00000030952 | LOC706715    | Tripartite Motif-containing Protein 51                                 | 14 | 0.13  | 3.94  | 0.00 | 4.96E-02 |
| ENSMMUG00000031100 | MS4A4A       | Membrane Spanning 4-domains A4A                                        | 14 | 0.39  | 0.05  | 0.00 | 6.62E-05 |
| ENSMMUG00000031123 | SCGB1A1      | Secretoglobin Family 1A Member 1                                       | 14 | 0.02  | 0.00  | 0.00 | 1.22E-02 |
| ENSMMUG00000031231 | DEFB116      | Defensin Beta 116                                                      | 10 | 0.34  | 0.00  | 0.00 | 2.38E-05 |
| ENSMMUG00000031636 | C11H12orf74  | Chromosome 11 Open Reading Frame, Human C12orf74                       | 11 | 1.36  | 0.08  | 0.00 | 7.12E-03 |
| ENSMMUG00000032367 |              |                                                                        | X  | 0.77  | 0.00  | 0.00 | 2.46E-11 |
| ENSMMUG00000032490 |              |                                                                        | 1  | 0.02  | 0.02  | 0.00 | 8.36E-04 |
| ENSMMUG00000037555 | LOC715706    | Schlafen Family Member 13                                              | 16 | 0.10  | 5.60  | 0.00 | 2.02E-02 |
| ENSMMUG00000037671 |              |                                                                        | 9  | 0.01  | 0.04  | 0.00 | 4.94E-02 |
| ENSMMUG00000037916 |              |                                                                        | 17 | 0.34  | 0.00  | 0.00 | 4.10E-04 |
| ENSMMUG00000038049 |              |                                                                        | X  | 0.01  | 0.01  | 0.00 | 4.02E-02 |
| ENSMMUG00000038182 | UTY          | Ubiquitously Transcribed Tetratricopeptide Repeat Containing, Y-linked | Y  | 0.05  | 3.88  | 0.00 | 2.39E-03 |
| ENSMMUG00000038331 | RPS4Y1       | Ribosomal Protein S4, Y-linked 1                                       | Y  | 0.08  | 52.72 | 0.00 | 1.75E-07 |
| ENSMMUG00000038468 |              |                                                                        | 3  | 1.87  | 0.00  | 0.00 | 6.71E-13 |
| ENSMMUG00000038526 |              |                                                                        | 13 | 0.00  | 0.63  | 0.00 | 2.91E-02 |
| ENSMMUG00000038641 |              |                                                                        | 2  | 0.00  | 0.21  | 0.00 | 1.18E-05 |
| ENSMMUG00000038729 |              |                                                                        | 7  | 0.02  | 0.14  | 0.00 | 2.78E-03 |
| ENSMMUG00000038763 |              |                                                                        | 7  | 0.16  | 3.35  | 0.00 | 3.69E-02 |
| ENSMMUG00000038777 |              |                                                                        | 13 | 0.00  | 0.51  | 0.00 | 1.98E-06 |

|                    |              |                                                                            |                |       |       |      |          |
|--------------------|--------------|----------------------------------------------------------------------------|----------------|-------|-------|------|----------|
| ENSMMUG00000038824 | RPS4Y2       | Ribosomal Protein S4, Y-linked 2                                           | Y              | 0.06  | 58.18 | 0.00 | 1.41E-07 |
| ENSMMUG00000038881 |              |                                                                            | 11             | 0.01  | 0.41  | 0.00 | 1.69E-04 |
| ENSMMUG00000039113 |              |                                                                            | 9              | 0.01  | 0.00  | 0.00 | 4.81E-02 |
| ENSMMUG00000039610 |              |                                                                            | 20             | 18.25 | 4.64  | 0.00 | 6.16E-03 |
| ENSMMUG00000040090 | LOC706584    | Uncharacterized LOC706584                                                  | 7              | 1.53  | 0.46  | 0.00 | 3.49E-14 |
| ENSMMUG00000040394 |              |                                                                            | 18             | 1.52  | 0.00  | 0.00 | 4.10E-18 |
| ENSMMUG00000040598 | LOC106995531 | Histone H2A-Bbd Type 2/3-like                                              | JSUE03070105.1 | 0.97  | 0.00  | 0.00 | 1.39E-04 |
| ENSMMUG00000041438 |              |                                                                            | 17             | 0.17  | 0.00  | 0.00 | 1.99E-03 |
| ENSMMUG00000041477 | FAM110B      | Family With Sequence Similarity 110 Member B                               | 8              | 0.04  | 0.00  | 0.00 | 1.37E-03 |
| ENSMMUG00000041553 |              |                                                                            | 4              | 0.03  | 0.00  | 0.00 | 4.51E-07 |
| ENSMMUG00000041692 |              |                                                                            | Y              | 0.07  | 3.12  | 0.00 | 1.58E-02 |
| ENSMMUG00000041733 | TMEM233      | Transmembrane Protein 233                                                  | 11             | 0.02  | 0.86  | 0.00 | 3.96E-04 |
| ENSMMUG00000041743 |              |                                                                            | 3              | 0.00  | 0.01  | 0.00 | 1.01E-02 |
| ENSMMUG00000042270 |              |                                                                            | 4              | 0.00  | 0.01  | 0.00 | 2.09E-02 |
| ENSMMUG00000042377 |              |                                                                            | 2              | 0.00  | 0.02  | 0.00 | 1.42E-04 |
| ENSMMUG00000042668 |              |                                                                            | 10             | 0.25  | 0.07  | 0.00 | 4.10E-08 |
| ENSMMUG00000042677 |              |                                                                            | 17             | 0.03  | 0.06  | 0.00 | 1.69E-04 |
| ENSMMUG00000042689 |              |                                                                            | 15             | 0.00  | 1.76  | 0.00 | 3.64E-03 |
| ENSMMUG00000043144 |              |                                                                            | 14             | 0.27  | 0.00  | 0.00 | 2.93E-02 |
| ENSMMUG00000043173 |              |                                                                            | 15             | 0.00  | 0.06  | 0.00 | 1.95E-02 |
| ENSMMUG00000043240 |              |                                                                            | 7              | 0.00  | 12.26 | 0.00 | 1.74E-09 |
| ENSMMUG00000043377 |              |                                                                            | JSUE03334786.1 | 0.33  | 0.05  | 0.00 | 4.23E-02 |
| ENSMMUG00000043394 |              |                                                                            | 10             | 0.00  | 1.21  | 0.00 | 5.84E-08 |
| ENSMMUG00000043599 |              |                                                                            | 16             | 0.00  | 0.46  | 0.00 | 4.83E-02 |
| ENSMMUG00000043698 |              |                                                                            | 12             | 0.88  | 0.00  | 0.00 | 1.00E-12 |
| ENSMMUG00000043715 | EIF1AY       | Eukaryotic Translation Initiation Factor 1A, Y-linked                      | Y              | 0.47  | 36.58 | 0.00 | 5.23E-03 |
| ENSMMUG00000043733 |              |                                                                            | 4              | 0.22  | 0.01  | 0.00 | 1.84E-02 |
| ENSMMUG00000043966 | DDX3Y        | DEAD-box Helicase 3, Y-linked                                              | Y              | 0.76  | 21.39 | 0.00 | 8.63E-12 |
| ENSMMUG00000044194 |              |                                                                            | 1              | 6.52  | 0.00  | 0.00 | 4.58E-06 |
| ENSMMUG00000044322 | FGFBP3       | Fibroblast Growth Factor Binding Protein 3                                 | 9              | 0.16  | 0.19  | 0.00 | 3.88E-12 |
| ENSMMUG00000044514 | PSORS1C2     | Psoriasis Susceptibility 1 Candidate 2                                     | 4              | 0.35  | 0.93  | 0.00 | 2.31E-02 |
| ENSMMUG00000044549 |              |                                                                            | JSUE03303087.1 | 2.26  | 0.00  | 0.00 | 5.20E-05 |
| ENSMMUG00000044802 |              |                                                                            | 1              | 0.00  | 0.74  | 0.00 | 8.09E-04 |
| ENSMMUG00000045303 |              |                                                                            | 13             | 0.37  | 0.00  | 0.00 | 1.05E-05 |
| ENSMMUG00000045369 |              |                                                                            | 11             | 0.64  | 0.00  | 0.00 | 6.88E-04 |
| ENSMMUG00000045648 | MXRA7        | Matrix Remodeling Associated 7                                             | 16             | 0.01  | 1.00  | 0.00 | 3.84E-02 |
| ENSMMUG00000046049 |              |                                                                            | 3              | 0.35  | 0.00  | 0.00 | 2.31E-02 |
| ENSMMUG00000046375 |              |                                                                            | 17             | 0.00  | 0.01  | 0.00 | 4.56E-02 |
| ENSMMUG00000046378 | ZFY          | Zinc Finger Protein, Y-linked                                              | Y              | 0.07  | 1.48  | 0.00 | 1.85E-02 |
| ENSMMUG00000046587 |              |                                                                            | 8              | 0.00  | 0.19  | 0.00 | 8.24E-09 |
| ENSMMUG00000046589 |              |                                                                            | 11             | 2.84  | 23.86 | 0.00 | 2.05E-03 |
| ENSMMUG00000046647 | FAM209B      | Family With Sequence Similarity 209 Member B                               | 10             | 0.52  | 0.42  | 0.00 | 6.00E-04 |
| ENSMMUG00000047082 |              |                                                                            | 7              | 0.07  | 0.12  | 0.00 | 3.40E-04 |
| ENSMMUG00000047599 |              |                                                                            | JSUE03084820.1 | 6.66  | 0.00  | 0.00 | 1.59E-10 |
| ENSMMUG00000047960 | SVEP1        | Sushi, Von Willebrand Factor Type A, EGF And Pentraxin Domain Containing 1 | 15             | 0.13  | 0.24  | 0.00 | 2.56E-02 |
| ENSMMUG00000048003 |              |                                                                            | JSUE03261988.1 | 0.53  | 0.00  | 0.00 | 1.35E-10 |
| ENSMMUG00000048323 |              |                                                                            | 6              | 0.00  | 0.02  | 0.00 | 7.16E-03 |
| ENSMMUG00000048330 |              |                                                                            | 12             | 0.02  | 0.00  | 0.00 | 1.19E-06 |
| ENSMMUG00000048684 |              |                                                                            | 7              | 0.39  | 0.02  | 0.00 | 9.56E-03 |
| ENSMMUG00000048768 |              |                                                                            | 14             | 0.04  | 0.78  | 0.00 | 1.52E-06 |
| ENSMMUG00000048947 |              |                                                                            | 2              | 0.00  | 1.20  | 0.00 | 1.16E-03 |
| ENSMMUG00000049101 | LOC100431025 | Olfactory Receptor 2T10                                                    | KQ742257.1     | 0.00  | 0.08  | 0.00 | 9.50E-03 |
| ENSMMUG00000049104 | CYHYorf15B   | Chromosome Y Open Reading Frame, Human CYorf15B                            | Y              | 0.06  | 3.72  | 0.00 | 6.54E-03 |

a) FPKM: Fragments Per Kilobase of transcript per Million mapped reads.

b) L2FC: Log fold change of base 2. Positive values indicate expression higher in female vs. male.

c) FDR: False discovery rate. Adjusted p-value using the Benjamin-Hochberg method.
