# Supplementary material
Source: PubMed Central journal article supplement (PMC6417155)
Supplement: gaz001_schall_et_al._table_s27.pdf [file gaz001_schall_et_al._table_s27.pdf]

Table S27 - Exp. Blastocyst Female/Male DEGs

| Gene               | Symbol       | GeneName                                                               | Chromosome     | FPKM <sup>a</sup> |       | Exp. Blast        |                  |
|--------------------|--------------|------------------------------------------------------------------------|----------------|-------------------|-------|-------------------|------------------|
|                    |              |                                                                        |                | Female            | Male  | L2FC <sup>b</sup> | FDR <sup>c</sup> |
| ENSMMUG00000038331 | RPS4Y1       | Ribosomal Protein S4, Y-linked 1                                       | Y              | 8.20              | 89.67 | -7.26             | 2.25E-10         |
| ENSMMUG00000038824 | RPS4Y2       | Ribosomal Protein S4, Y-linked 2                                       | Y              | 7.38              | 77.16 | -7.11             | 1.45E-08         |
| ENSMMUG00000043715 | EIF1AY       | Eukaryotic Translation Initiation Factor 1A, Y-linked                  | Y              | 4.59              | 27.97 | -3.68             | 4.98E-02         |
| ENSMMUG00000043966 | DDX3Y        | DEAD-box Helicase 3, Y-linked                                          | Y              | 3.34              | 21.29 | -3.54             | 6.29E-07         |
| ENSMMUG00000014258 | FAM9C        | Family With Sequence Similarity 9 Member C                             | X              | 2.12              | 0.08  | 4.37              | 1.36E-02         |
| ENSMMUG00000046034 |              |                                                                        | JSUE03158331.1 | 0.85              | 0.00  | 22.88             | 2.94E-02         |
| ENSMMUG00000042420 | PNMA2        | PNMA Family Member 2                                                   | 8              | 0.71              | 0.06  | 9.28              | 9.88E-03         |
| ENSMMUG00000045991 | USP9Y        | Ubiquitin Specific Peptidase 9, Y-linked                               | Y              | 0.66              | 7.07  | -3.47             | 7.77E-05         |
| ENSMMUG00000038182 | UTY          | Ubiquitously Transcribed Tetratricopeptide Repeat Containing, Y-linked | Y              | 0.59              | 6.82  | -4.84             | 2.31E-04         |
| ENSMMUG00000045670 |              |                                                                        | JSUE03320604.1 | 0.45              | 0.00  | 22.23             | 4.38E-02         |
| ENSMMUG00000003144 | KCNJ1        | Potassium Voltage-gated Channel Subfamily J Member 1                   | 14             | 0.37              | 0.00  | 5.99              | 2.75E-02         |
| ENSMMUG00000047352 |              |                                                                        | 14             | 0.34              | 0.00  | 31.11             | 2.03E-25         |
| ENSMMUG00000045017 | KDM5D        | Lysine Demethylase 5D                                                  | Y              | 0.33              | 2.07  | -7.61             | 8.49E-05         |
| ENSMMUG00000039683 |              |                                                                        | JSUE03105675.1 | 0.32              | 0.00  | 22.71             | 3.21E-02         |
| ENSMMUG00000008210 | SRPX2        | Sushi Repeat Containing Protein, X-linked 2                            | X              | 0.24              | 0.00  | 20.31             | 1.61E-08         |
| ENSMMUG00000040516 |              |                                                                        | X              | 0.23              | 0.01  | 13.87             | 1.58E-07         |
| ENSMMUG00000021726 | ASZ1         | Ankyrin Repeat, SAM And Basic Leucine Zipper Domain Containing 1       | 3              | 0.22              | 0.00  | 16.41             | 2.65E-16         |
| ENSMMUG00000045892 |              |                                                                        | 15             | 0.19              | 0.00  | 8.94              | 2.74E-02         |
| ENSMMUG00000013751 | OPN5         | Opsin 5                                                                | 4              | 0.18              | 0.00  | 18.49             | 1.08E-09         |
| ENSMMUG00000041755 |              |                                                                        | 18             | 0.16              | 0.03  | -12.17            | 1.27E-04         |
| ENSMMUG00000045191 | XKRX         | XK Related, X-linked                                                   | X              | 0.15              | 0.00  | 26.42             | 7.68E-18         |
| ENSMMUG00000044806 |              |                                                                        | 8              | 0.14              | 0.00  | 21.07             | 3.28E-11         |
| ENSMMUG00000010405 | FAM171B      | Family With Sequence Similarity 171 Member B                           | 12             | 0.13              | 4.00  | -3.50             | 9.46E-03         |
| ENSMMUG00000042957 |              |                                                                        | 2              | 0.11              | 0.00  | 16.67             | 4.65E-05         |
| ENSMMUG00000004179 | LIMS2        | LIM Zinc Finger Domain Containing 2                                    | 12             | 0.08              | 0.01  | 5.29              | 4.83E-02         |
| ENSMMUG00000040777 | DBX1         | Developing Brain Homeobox 1                                            | 14             | 0.08              | 0.00  | 17.59             | 5.03E-03         |
| ENSMMUG00000014116 | OR5A2        | Olfactory Receptor, Family 5, Subfamily A, Member 2                    | 14             | 0.07              | 0.00  | 24.85             | 5.16E-30         |
| ENSMMUG00000046589 |              |                                                                        | 11             | 0.07              | 9.81  | -17.68            | 1.59E-08         |
| ENSMMUG00000039886 |              |                                                                        | 8              | 0.07              | 0.00  | 19.95             | 3.12E-11         |
| ENSMMUG00000022734 | LOC701233    | Type-1 Protein Phosphatase Inhibitor 4                                 | X              | 0.05              | 0.00  | 16.57             | 5.02E-11         |
| ENSMMUG00000005591 | LOC705142    | Putative Methyl-CpG-binding Domain Protein 3-like 5                    | 19             | 0.04              | 3.93  | -5.70             | 2.13E-02         |
| ENSMMUG00000002236 | LMX1B        | LIM Homeobox Transcription Factor 1 Beta                               | 15             | 0.03              | 0.44  | -8.87             | 6.47E-03         |
| ENSMMUG00000048609 |              |                                                                        | 17             | 0.03              | 0.00  | 16.52             | 1.43E-16         |
| ENSMMUG00000046533 |              |                                                                        | 6              | 0.03              | 0.00  | 14.10             | 2.94E-02         |
| ENSMMUG00000009384 | IGFBP4       | Insulin Like Growth Factor Binding Protein 4                           | 16             | 0.02              | 0.08  | -12.32            | 2.48E-02         |
| ENSMMUG00000043273 |              |                                                                        | 1              | 0.02              | 0.00  | 22.82             | 1.97E-06         |
| ENSMMUG00000005870 | DMTN         | Dematin Actin Binding Protein                                          | 8              | 0.02              | 0.00  | 17.97             | 1.22E-11         |
| ENSMMUG00000018571 | CREB3L1      | CAMP Responsive Element Binding Protein 3 Like 1                       | 14             | 0.01              | 0.00  | 18.74             | 1.71E-14         |
| ENSMMUG00000031636 | C11H12orf74  | Chromosome 11 Open Reading Frame, Human C12orf74                       | 11             | 0.01              | 0.16  | -15.70            | 2.42E-09         |
| ENSMMUG00000013837 | SHISA9       | Shisa Family Member 9                                                  | 20             | 0.01              | 0.00  | 15.37             | 4.89E-09         |
| ENSMMUG00000000500 | FNDC1        | Fibronectin Type III Domain Containing 1                               | 4              | 0.01              | 0.09  | -6.33             | 4.36E-02         |
| ENSMMUG00000042275 |              |                                                                        | 14             | 0.01              | 0.00  | 14.71             | 3.08E-02         |
| ENSMMUG00000002553 | CYP19A1      | Cytochrome P450, Family 19, Subfamily A, Polypeptide 1                 | 7              | 0.01              | 0.17  | -6.34             | 1.05E-02         |
| ENSMMUG00000011376 | GPC5         | Glypican 5                                                             | 17             | 0.00              | 0.14  | -6.54             | 4.97E-03         |
| ENSMMUG00000045049 | LOC106995304 | Uncharacterized LOC106995304                                           | X              | 0.00              | 0.01  | -16.15            | 1.02E-06         |
| ENSMMUG00000046542 | LOC704641    | Keratin-associated Protein 4-2                                         | JSUE03156730.1 | 0.00              | 0.08  | -21.06            | 4.29E-04         |
| ENSMMUG00000040598 | LOC106995531 | Histone H2A-Bbd Type 2/3-like                                          | JSUE03070105.1 | 0.00              | 0.47  | -29.91            | 2.01E-04         |
| ENSMMUG00000018363 | CYP2B6       | Cytochrome P450, Family 2, Subfamily B, Polypeptide 6                  | 19             | 0.00              | 0.19  | -26.79            | 1.73E-16         |

|                     |              |                                                                   |    |      |      |        |          |
|---------------------|--------------|-------------------------------------------------------------------|----|------|------|--------|----------|
| ENSMMUG00000021111  | SIGLEC10     | Sialic Acid Binding Ig Like Lectin 10                             | 19 | 0.00 | 0.07 | -14.52 | 8.50E-10 |
| ENSMMUG00000020494  |              |                                                                   | 19 | 0.00 | 0.25 | -21.28 | 4.29E-08 |
| ENSMMUG00000040394  |              |                                                                   | 18 | 0.00 | 0.35 | -30.19 | 3.62E-41 |
| ENSMMUG00000039055  |              |                                                                   | 18 | 0.00 | 0.43 | -23.10 | 1.83E-03 |
| ENSMMUG00000021817  | DCT          | Dopachrome Tautomerase                                            | 17 | 0.00 | 0.06 | -21.09 | 9.24E-20 |
| ENSMMUG00000005847  |              |                                                                   | 17 | 0.00 | 0.02 | -12.91 | 5.75E-07 |
| ENSMMUG00000046375  |              |                                                                   | 17 | 0.00 | 0.01 | -11.74 | 3.38E-02 |
| ENSMMUG00000009995  | ALOX15B      | Arachidonate 15-lipoxygenase, Type B                              | 16 | 0.00 | 0.00 | -14.23 | 1.69E-08 |
| ENSMMUG00000042689  |              |                                                                   | 15 | 0.00 | 0.14 | -19.54 | 7.42E-09 |
| ENSMMUG00000001827  | PLPPR1       | Phospholipid Phosphatase Related 1                                | 15 | 0.00 | 0.03 | -14.59 | 8.19E-07 |
| ENSMMUG00000046827  |              |                                                                   | 15 | 0.00 | 0.18 | -18.60 | 1.02E-02 |
| ENSMMUG00000000018  | MS4A10       | Membrane Spanning 4-domains A10                                   | 14 | 0.00 | 0.01 | -19.90 | 1.92E-14 |
| ENSMMUG00000043454  |              |                                                                   | 14 | 0.00 | 0.63 | -23.63 | 1.97E-02 |
| ENSMMUG00000038367  | SOX11        | SRY-box 11                                                        | 13 | 0.00 | 0.01 | -28.81 | 6.49E-10 |
| ENSMMUG00000048330  |              |                                                                   | 12 | 0.00 | 0.01 | -24.51 | 2.65E-20 |
| ENSMMUG00000038065  |              |                                                                   | 11 | 0.00 | 0.17 | -31.98 | 5.86E-23 |
| ENSMMUG00000043220  |              |                                                                   | 11 | 0.00 | 0.47 | -19.89 | 5.78E-20 |
| ENSMMUG00000032062  | MANSC4       | MANSC Domain Containing 4                                         | 11 | 0.00 | 0.23 | -34.59 | 3.61E-06 |
| ENSMMUG00000042668  |              |                                                                   | 10 | 0.00 | 0.12 | -32.04 | 3.23E-68 |
| ENSMMUG00000041493  | LOC107000631 | Uncharacterized LOC107000631                                      | 10 | 0.00 | 0.84 | -30.93 | 3.48E-32 |
| ENSMMUG00000006852  | CRYBB3       | Crystallin Beta B3                                                | 10 | 0.00 | 0.01 | -17.41 | 1.69E-08 |
| ENSMMUG00000031231  | DEFB116      | Defensin Beta 116                                                 | 10 | 0.00 | 0.02 | -13.43 | 9.53E-06 |
|                     |              | Cytochrome P450, Family 2, Subfamily E, Polypeptide 1             |    | 0.00 | 0.01 | -20.90 | 5.39E-22 |
| ENSMMUG00000006339  | CYP2E1       |                                                                   | 9  |      |      |        |          |
| ENSMMUG00000037671  |              |                                                                   | 9  | 0.00 | 0.09 | -24.68 | 1.74E-20 |
| ENSMMUG00000000148  | PNLIP        | Pancreatic Lipase                                                 | 9  | 0.00 | 0.04 | -18.56 | 1.54E-09 |
| ENSMMUG00000046427  |              |                                                                   | 8  | 0.00 | 0.31 | -16.28 | 8.61E-20 |
| ENSMMUG00000008574  | USP50        | Ubiquitin Specific Peptidase 50                                   | 7  | 0.00 | 0.16 | -33.15 | 3.92E-58 |
| ENSMMUG00000012838  | OTUD7A       | OTU Deubiquitinase 7A                                             | 7  | 0.00 | 0.01 | -28.51 | 7.71E-42 |
| ENSMMUG00000041797  |              |                                                                   | 7  | 0.00 | 0.54 | -23.86 | 1.08E-03 |
| ENSMMUG00000002488  |              |                                                                   | 6  | 0.00 | 0.01 | -27.96 | 6.16E-45 |
| ENSMMUG000000022471 |              |                                                                   | 6  | 0.00 | 2.31 | -32.23 | 1.65E-35 |
| ENSMMUG00000048323  |              |                                                                   | 6  | 0.00 | 0.05 | -14.42 | 2.90E-05 |
| ENSMMUG00000038684  |              |                                                                   | 4  | 0.00 | 0.17 | -22.59 | 4.22E-32 |
| ENSMMUG00000042564  |              |                                                                   | 4  | 0.00 | 0.78 | -23.80 | 1.68E-03 |
| ENSMMUG00000039357  |              |                                                                   | 3  | 0.00 | 0.09 | -18.13 | 7.04E-07 |
| ENSMMUG00000042377  |              |                                                                   | 2  | 0.00 | 0.03 | -17.93 | 3.19E-14 |
|                     |              | Hes Related Family BHLH Transcription Factor With YRPW Motif-like |    | 0.00 | 0.03 | -29.65 | 8.25E-21 |
| ENSMMUG00000018861  | HEYL         |                                                                   | 1  |      |      |        |          |
| ENSMMUG00000019020  | SLC2A7       | Solute Carrier Family 2 Member 7                                  | 1  | 0.00 | 0.05 | -24.59 | 1.21E-18 |
| ENSMMUG00000039486  |              |                                                                   | 1  | 0.00 | 0.05 | -29.65 | 2.79E-12 |
| ENSMMUG00000031248  |              |                                                                   | 1  | 0.00 | 0.50 | -33.90 | 1.15E-11 |
| ENSMMUG00000027219  | MIR554       | MicroRNA 554                                                      | 1  | 0.00 | 0.60 | -30.67 | 1.11E-04 |

a) FPKM: Fragments Per Kilobase of transcript per Million mapped reads.

b) L2FC: Log fold change of base 2. Positive values indicate expression higher in female vs. male.

c) FDR: False discovery rate. Adjusted p-value using the Benjamin-Hochberg method.
