# Supplementary material
Source: PubMed Central journal article supplement (PMC6417155)
Supplement: gaz001_schall_et_al._table_s28.pdf [file gaz001_schall_et_al._table_s28.pdf]

Table S28 - IPA canonical pathways comparing female vs. male at morula and blastocyst stages

| Canonical Pathways                                          | p-value <sup>a</sup> | DEGs Up | DEGs Down | DEGs Total | Cell Stage |
|-------------------------------------------------------------|----------------------|---------|-----------|------------|------------|
| VDR/RXR Activation                                          | 2.51E-02             | 1       | 1         | 2          | Morula     |
| α-Adrenergic Signaling                                      | 3.09E-02             | 0       | 2         | 2          | Morula     |
| Neuregulin Signaling                                        | 3.16E-02             | 0       | 2         | 2          | Morula     |
| VEGF Family Ligand-Receptor Interactions                    | 3.16E-02             | 0       | 2         | 2          | Morula     |
| Crosstalk between Dendritic Cells and Natural Killer Cells  | 3.24E-02             | 0       | 2         | 2          | Morula     |
| Altered T Cell and B Cell Signaling in Rheumatoid Arthritis | 3.24E-02             | 1       | 1         | 2          | Morula     |
| Bupropion Degradation                                       | 1.26E-05             | 0       | 3         | 3          | Blastocyst |
| Acetone Degradation I (to Methylglyoxal)                    | 2.19E-05             | 0       | 3         | 3          | Blastocyst |
| Estrogen Biosynthesis                                       | 5.75E-05             | 0       | 3         | 3          | Blastocyst |
| Nicotine Degradation III                                    | 1.45E-04             | 0       | 3         | 3          | Blastocyst |
| Melatonin Degradation I                                     | 2.29E-04             | 0       | 3         | 3          | Blastocyst |
| Nicotine Degradation II                                     | 2.29E-04             | 0       | 3         | 3          | Blastocyst |
| Superpathway of Melatonin Degradation                       | 2.82E-04             | 0       | 3         | 3          | Blastocyst |
| Regulation of eIF4 and p70S6K Signaling                     | 3.31E-02             | 0       | 2         | 2          | Blastocyst |
| Hepatic Fibrosis / Hepatic Stellate Cell Activation         | 4.57E-02             | 0       | 2         | 2          | Blastocyst |

a) The p-value: statistical overlap of differentially expressed gene list and gene set
