# Supplementary material
Source: PubMed Central journal article supplement (PMC6417155)
Supplement: gaz001_schall_et_al._table_s29.pdf [file gaz001_schall_et_al._table_s29.pdf]

Table S29 - IPA upstream regulators differentially expressed from sub-groups

| Upstream Regulator | Molecule Type                     | p-value  | z-score | State     | Total DEG Targets | Sub-Group |
|--------------------|-----------------------------------|----------|---------|-----------|-------------------|-----------|
| PSEN1              | peptidase                         | 2.71E-03 | 0.208   |           | 41                | M-1       |
| BMP6               | growth factor                     | 4.42E-03 | -0.625  |           | 14                | M-1       |
| FIGLA              | transcription regulator           | 1.42E-02 | 0       |           | 9                 | M-1       |
| ESR2               | ligand-dependent nuclear receptor | 2.43E-02 | -1.739  |           | 40                | M-1       |
| DLG3               | kinase                            | 2.53E-02 |         |           | 2                 | M-1       |
| PHF21A             | enzyme                            | 2.63E-02 |         |           | 3                 | M-1       |
| DAB2IP             | other                             | 2.63E-02 |         |           | 3                 | M-1       |
| LDB1               | transcription regulator           | 2.63E-02 |         |           | 3                 | M-1       |
| JAG1               | growth factor                     | 3.30E-02 | -2.186  | Inhibited | 6                 | M-1       |
| LMO2               | transcription regulator           | 3.43E-02 |         |           | 3                 | M-1       |
| PSEN2              | peptidase                         | 3.61E-02 | -0.295  |           | 11                | M-1       |
| SPRY4              | other                             | 4.03E-02 |         |           | 2                 | M-1       |
| CDH5               | other                             | 4.35E-02 |         |           | 3                 | M-1       |
| CHST4              | enzyme                            | 4.03E-03 |         |           | 2                 | M-2       |
| NFKBIA             | transcription regulator           | 1.28E-02 | -1.499  |           | 20                | M-2       |
| PRKCE              | kinase                            | 1.43E-02 | -2.219  | Inhibited | 6                 | M-2       |
| IL2RB              | transmembrane receptor            | 4.48E-02 |         |           | 2                 | M-2       |
| FHL2               | transcription regulator           | 4.54E-02 |         |           | 4                 | M-2       |
| ATG7               | enzyme                            | 4.82E-02 |         |           | 4                 | M-2       |
| ITGA4              | transmembrane receptor            | 2.68E-03 |         |           | 2                 | M-3       |
| TMPRSS2            | peptidase                         | 7.90E-03 |         |           | 1                 | M-3       |
| GPBP1              | transcription regulator           | 1.57E-02 |         |           | 1                 | M-3       |
| VLDLR              | transporter                       | 3.89E-02 |         |           | 1                 | M-3       |
| RPRD1B             | other                             | 5.16E-05 |         |           | 2                 | EGA1-1    |
| USP36              | peptidase                         | 7.21E-03 |         |           | 1                 | EGA1-1    |
| CXCR4              | g-protein coupled receptor        | 8.89E-03 |         |           | 3                 | EGA1-1    |
| NOSIP              | other                             | 1.44E-02 |         |           | 1                 | EGA1-1    |
| SOX11              | transcription regulator           | 2.08E-02 |         |           | 3                 | EGA1-1    |
| EBF3               | transcription regulator           | 2.15E-02 |         |           | 1                 | EGA1-1    |
| LDLR               | transporter                       | 2.81E-02 |         |           | 3                 | EGA1-1    |
| CCND1              | transcription regulator           | 3.43E-02 |         |           | 6                 | EGA1-1    |
| SNIP1              | other                             | 4.25E-02 |         |           | 1                 | EGA1-1    |
| HNF4A              | transcription regulator           | 1.72E-13 | 1.32    |           | 167               | EGA2-1    |
| RRP1B              | transcription regulator           | 8.27E-05 |         |           | 15                | EGA2-1    |
| MCL1               | transporter                       | 1.76E-03 |         |           | 3                 | EGA2-1    |
| CDK4/6             | group                             | 5.18E-03 | -1.667  |           | 9                 | EGA2-1    |
| SERTAD1            | transcription regulator           | 6.17E-03 |         |           | 2                 | EGA2-1    |
| SRSF1              | other                             | 1.29E-02 |         |           | 5                 | EGA2-1    |
| SALL4              | transcription regulator           | 1.43E-02 | 0.283   |           | 4                 | EGA2-1    |
| SSRP1              | other                             | 1.67E-02 |         |           | 5                 | EGA2-1    |
| LATS1              | kinase                            | 1.93E-02 |         |           | 2                 | EGA2-1    |
| TEAD4              | transcription regulator           | 2.12E-02 |         |           | 5                 | EGA2-1    |
| AMER1              | other                             | 2.81E-02 |         |           | 2                 | EGA2-1    |
| SLC16A1            | transporter                       | 2.81E-02 |         |           | 2                 | EGA2-1    |
| HNRNPU             | transporter                       | 2.93E-02 |         |           | 3                 | EGA2-1    |
| SET                | phosphatase                       | 3.56E-02 | -2.236  | Inhibited | 5                 | EGA2-1    |

|            |                         |          |        |           |    |        |
|------------|-------------------------|----------|--------|-----------|----|--------|
| CGA        | other                   | 3.80E-02 |        |           | 4  | EGA2-1 |
| SOX2-OCT4  | complex                 | 3.82E-02 |        |           | 2  | EGA2-1 |
| INSR       | kinase                  | 4.40E-02 | 2.114  | Activated | 26 | EGA2-1 |
| NAA15      | transcription regulator | 4.61E-02 |        |           | 1  | EGA2-1 |
| RASSF1-AS1 | other                   | 4.61E-02 |        |           | 1  | EGA2-1 |
| TXNRD1     | enzyme                  | 4.94E-02 |        |           | 2  | EGA2-1 |
| CLDN6      | other                   | 8.51E-03 |        |           | 2  | EGA2-2 |
| ROCK2      | kinase                  | 1.86E-02 |        |           | 2  | EGA2-2 |
| HSPA5      | enzyme                  | 3.06E-02 |        |           | 2  | EGA2-2 |
| KITLG      | growth factor           | 4.54E-02 |        |           | 4  | EGA2-2 |
| SAMM50     | other                   | 1.41E-03 |        |           | 2  | EGA3-1 |
| SCD        | enzyme                  | 1.51E-03 | -1.285 |           | 6  | EGA3-1 |
| ERBB2      | kinase                  | 2.41E-03 | 2.524  | Activated | 29 | EGA3-1 |
| DNM1L      | enzyme                  | 4.58E-03 |        |           | 2  | EGA3-1 |
| EGLN1      | enzyme                  | 9.36E-03 | 0.343  |           | 5  | EGA3-1 |
| MTX2       | transporter             | 2.19E-02 |        |           | 1  | EGA3-1 |
| ARFGEF2    | other                   | 2.19E-02 |        |           | 1  | EGA3-1 |
| YES1       | kinase                  | 2.19E-02 |        |           | 1  | EGA3-1 |
| PNPT1      | enzyme                  | 2.31E-02 |        |           | 2  | EGA3-1 |
| ELF3       | transcription regulator | 2.50E-02 |        |           | 3  | EGA3-1 |
| CEBPB      | transcription regulator | 3.55E-02 | 2.965  | Activated | 15 | EGA3-1 |
| CAMK2D     | kinase                  | 3.66E-02 |        |           | 2  | EGA3-1 |
| ACOX1      | enzyme                  | 3.95E-02 | -0.956 |           | 7  | EGA3-1 |
| AKAP10     | other                   | 4.33E-02 |        |           | 1  | EGA3-1 |
| MCM3       | enzyme                  | 4.33E-02 |        |           | 1  | EGA3-1 |
| REL        | transcription regulator | 8.08E-03 |        |           | 2  | EGA3-3 |
| QPCT       | enzyme                  | 9.76E-03 |        |           | 1  | EGA4-1 |
| TIMP3      | other                   | 1.04E-02 |        |           | 2  | EGA4-1 |
| GRN        | growth factor           | 1.04E-02 |        |           | 2  | EGA4-1 |
| BMP2       | growth factor           | 1.43E-02 | 2.363  | Activated | 6  | EGA4-1 |
| TCF7L2     | transcription regulator | 1.64E-02 | 2.778  | Activated | 8  | EGA4-1 |
| IGF1       | growth factor           | 1.78E-02 | 0.639  |           | 10 | EGA4-1 |
| VTN        | other                   | 3.67E-02 |        |           | 2  | EGA4-1 |
| FN1        | enzyme                  | 7.08E-03 | 0.152  |           | 5  | EGA4-2 |
| ETV4       | transcription regulator | 1.42E-02 |        |           | 2  | EGA4-2 |
| EGFR       | kinase                  | 4.92E-03 | 0.537  |           | 5  | EGA4-3 |
| CLCN5      | ion channel             | 4.11E-02 |        |           | 1  | EGA4-3 |
