# Supplementary material
Source: PubMed Central journal article supplement (PMC6417155)
Supplement: gaz001_schall_et_al._table_s32.pdf [file gaz001_schall_et_al._table_s32.pdf]

Table S32 - IPA maternal upstream regulators targets in affected sub-group canonical pathways

| Pathways                                                | Sub-Group | Upstream Regulators |      |                    |                 |            |
|---------------------------------------------------------|-----------|---------------------|------|--------------------|-----------------|------------|
|                                                         |           | PRKCE               | JAG1 | PSEN1              | ESR2            | NFKBIA     |
| Signaling by Rho Family GTPases                         | M-1       |                     |      | GNAO1 GNG2 PAK1    |                 |            |
| GPCR-Mediated Nutrient Sensing in Enteroendocrine Cells | M-1       |                     |      | GNG2               |                 |            |
| Synaptic Long Term Depression                           | M-2       | PRKCE PRKD1         |      |                    |                 |            |
| Sperm Motility                                          | M-2       | PRKCE PRKD1         |      |                    |                 |            |
| PAK Signaling                                           | M-1       |                     |      | PAK1               |                 |            |
| Sperm Motility                                          | M-1       |                     |      | PAFAH1B2           |                 |            |
| Antioxidant Action of Vitamin C                         | M-2       |                     |      |                    |                 | NFKBIA     |
| Synaptic Long Term Potentiation                         | M-2       | PRKCE PRKD1         |      |                    |                 |            |
| Dopamine-DARPP32 Feedback in cAMP Signaling             | M-1       |                     |      | GRIN2A GRIN2B NOS1 |                 |            |
| Melatonin Signaling                                     | M-2       | PRKCE PRKD1         |      |                    |                 |            |
| Opioid Signaling Pathway                                | M-3       |                     |      |                    | CACNA1D MAPK4   |            |
| Androgen Signaling                                      | M-3       |                     |      |                    | CACNA1D         |            |
| STAT3 Pathway                                           | M-2       | STAT3               |      |                    |                 |            |
| ERK/MAPK Signaling                                      | M-3       |                     |      |                    | PPP1R3C         |            |
| Dopamine-DARPP32 Feedback in cAMP Signaling             | M-3       |                     |      |                    | CACNA1D PPP1R3C |            |
| Netrin Signaling                                        | M-1       |                     |      | RYR2 RYR3          |                 |            |
| Pyridoxal 5'-phosphate Salvage Pathway                  | M-1       |                     |      | DYRK1A PAK1        |                 |            |
| Superpathway of Citrulline Metabolism                   | M-1       |                     |      | NOS1               |                 |            |
| nNOS Signaling in Skeletal Muscle Cells                 | M-1       |                     |      | NOS1 RYR2 RYR3     |                 |            |
| Phospholipases                                          | M-1       |                     |      | PAFAH1B2           |                 |            |
| Cellular Effects of Sildenafil (Viagra)                 | M-1       |                     |      |                    | MYH3            |            |
| nNOS Signaling in Neurons                               | M-2       | PRKCE PRKD1         |      |                    |                 |            |
| Factors Promoting Cardiogenesis in Vertebrates          | M-2       | PRKCE PRKD1         |      |                    |                 |            |
| 4-1BB Signaling in T Lymphocytes                        | M-2       |                     |      |                    |                 | NFKBIA     |
| Netrin Signaling                                        | M-3       |                     |      |                    | CACNA1D         |            |
| FcγRIIB Signaling in B Lymphocytes                      | M-3       |                     |      |                    | CACNA1D         |            |
| nNOS Signaling in Skeletal Muscle Cells                 | M-3       |                     |      |                    | CACNA1D         |            |
| VDR/RXR Activation                                      | M-3       |                     |      |                    | MXD1            |            |
| Maturity Onset Diabetes of Young (MODY) Signaling       | M-3       |                     |      |                    | CACNA1D         |            |
| Dopamine Receptor Signaling                             | M-3       |                     |      |                    | PPP1R3C PRL     |            |
| Role of JAK2 in Hormone-like Cytokine Signaling         | M-3       |                     |      |                    | PRL             |            |
| PKCθ Signaling in T Lymphocytes                         | M-3       |                     |      |                    | CACNA1D         |            |
| CCR5 Signaling in Macrophages                           | M-3       |                     |      |                    | CACNA1D         |            |
| GABA Receptor Signaling                                 | M-3       |                     |      |                    | CACNA1D         |            |
| mTOR Signaling                                          | EGA2-2    |                     |      |                    |                 | HMOX1 RPSA |
| Heme Degradation                                        | EGA2-2    |                     |      |                    |                 | HMOX1      |
| Trehalose Degradation II (Trehalase)                    | EGA2-2    |                     |      |                    |                 | HK2        |
| Creatine-phosphate Biosynthesis                         | EGA2-2    |                     |      | CKB                |                 |            |
| The Visual Cycle                                        | EGA3-4    |                     |      |                    | RDH10           |            |
| Retinoate Biosynthesis I                                | EGA3-4    |                     |      |                    | RDH10           |            |
| Retinol Biosynthesis                                    | EGA3-4    |                     |      |                    | RDH10           |            |
| Basal Cell Carcinoma Signaling                          | EGA4-1    |                     |      |                    |                 | BMP2       |
| Thyroid Hormone Biosynthesis                            | EGA4-2    |                     |      |                    | CTSD            |            |

|                                                                                |        |             |              |                                  |  |                   |                       |
|--------------------------------------------------------------------------------|--------|-------------|--------------|----------------------------------|--|-------------------|-----------------------|
| Calcium Signaling                                                              | M-1    |             |              | GRIN2A GRIN2B RYR2<br>RZR3       |  | MYH3 TPM1         |                       |
| RhoGDI Signaling                                                               | M-1    |             |              | GDI2 GNAO1 GNG2<br>PAK1          |  | ESR2              |                       |
| TGF-β Signaling                                                                | M-1    |             | RUNX2        |                                  |  | BMP4 RUNX2        |                       |
| D-myo-inositol-5-phosphate<br>Metabolism                                       | M-1    |             | DUSP10 DUSP8 |                                  |  | DUSP10            |                       |
| VDR/RXR Activation                                                             | M-1    |             | RUNX2        |                                  |  | IGFBP3 MXD1 RUNX2 |                       |
| 3-phosphoinositide Degradation                                                 | M-1    |             | DUSP10 DUSP8 |                                  |  | DUSP10            |                       |
| IL-10 Signaling                                                                | M-2    | STAT3       |              |                                  |  |                   | IL10 NFKBIA           |
| Th1 and Th2 Activation Pathway                                                 | M-2    | IL2RB STAT3 |              |                                  |  |                   | IL10                  |
| Wnt/β-catenin Signaling                                                        | EGA1-1 | CCND1 MYC   | CCND1 MYC    |                                  |  |                   |                       |
| Estrogen-mediated S-phase Entry                                                | EGA1-1 | CCND1 MYC   | CCND1 MYC    |                                  |  |                   |                       |
| Huntington's Disease Signaling                                                 | EGA2-2 |             |              | HSPA5 HSPA8                      |  |                   | HSPA5 HSPA8           |
| Cell Cycle: G2/M DNA Damage<br>Checkpoint Regulation                           | EGA2-2 |             |              | YWHAZ                            |  |                   | YWHAZ                 |
| Phagosome Maturation                                                           | EGA2-2 |             |              | ATP6V1A                          |  |                   | ATP6V1B1              |
| Colorectal Cancer Metastasis<br>Signaling                                      | EGA4-1 | NFKB1       |              |                                  |  |                   | NFKB1                 |
| LXR/RXR Activation                                                             | EGA4-1 | NFKB1       |              |                                  |  |                   | APOA1 NFKB1           |
| Atherosclerosis Signaling                                                      | EGA4-1 | NFKB1       |              |                                  |  |                   | APOA1 COL1A2<br>NFKB1 |
| Hepatic Fibrosis / Hepatic Stellate Cell<br>Activation                         | EGA4-1 | NFKB1       |              |                                  |  |                   | COL1A2 NFKB1          |
| Role of JAK1 JAK2 and TYK2 in<br>Interferon Signaling                          | EGA4-1 | NFKB1       |              |                                  |  |                   | NFKB1                 |
| IL-15 Production                                                               | EGA4-1 | NFKB1       |              |                                  |  |                   | NFKB1                 |
| Th2 Pathway                                                                    | M-1    |             | CD86         | PSEN1 PSEN2                      |  | JAG1              |                       |
| Notch Signaling                                                                | M-1    |             | HEY2         | DLL3 PSEN1 PSEN2<br>RBPJ         |  | JAG1              |                       |
| Osteoarthritis Pathway                                                         | EGA4-1 | NFKB1       | SPP1         |                                  |  |                   | BMP2 NFKB1 TIMP3      |
| Role of Osteoblasts Osteoclasts and<br>Chondrocytes in Rheumatoid<br>Arthritis | EGA4-1 | NFKB1       | SPP1         |                                  |  |                   | BMP2 NFKB1            |
| Actin Cytoskeleton Signaling                                                   | M-1    |             |              | PAK1                             |  | MYH3 VAV3         |                       |
| Synaptic Long Term Depression                                                  | M-1    |             |              | GNAO1 NOS1<br>PAFAH1B2 RYR2 RYR3 |  | IGF1R             |                       |
