# Supplementary material
Source: PubMed Central journal article supplement (PMC6417155)
Supplement: gaz001_schall_et_al._table_s33.pdf [file gaz001_schall_et_al._table_s33.pdf]

|                                                                         |                  |            |                |           |        |
|-------------------------------------------------------------------------|------------------|------------|----------------|-----------|--------|
| Arsenate<br>Detoxification I<br>(Glutaredoxin)                          | EGA2-2           |            | GSTO1          |           |        |
| Heme<br>Degradation                                                     | EGA2-2           |            |                | HMOX<br>1 |        |
| Ascorbate<br>Recycling<br>(Cytosolic)                                   | EGA2-2           |            | GSTO1          |           |        |
| Serine<br>Biosynthesis<br>Superpathway<br>of Serine and<br>Glycine      | EGA2-2           |            | PSAT1          |           |        |
| Biosynthesis I<br>Vitamin-C<br>Transport                                | EGA2-4           |            | PSAT1          |           | SLC2A1 |
| Regulation of<br>Actin-based<br>Motility by<br>Rho<br>Actin             | EGA3-1           |            |                | CFL1      |        |
| Nucleation by<br>ARP-WASP<br>Complex                                    | EGA3-2           |            |                |           | RHOD   |
| Retinoic acid<br>Mediated<br>Apoptosis<br>Signaling<br>Glioma           | EGA3-2           |            | IFNAR1<br>RXRB |           |        |
| Invasiveness<br>Signaling                                               | EGA3-2           |            |                |           | RHOD   |
| Regulation of<br>Actin-based<br>Motility by<br>Rho                      | EGA3-2           |            |                |           | RHOD   |
| DNA Double-<br>Strand Break<br>Repair by<br>Homologous<br>Recombination | EGA3-2           |            |                |           | LIG1   |
| Endoplasmic<br>Reticulum<br>Stress Pathway                              | EGA3-2           |            | HSP90B<br>1    |           |        |
| Semaphorin<br>Signaling in<br>Neurons                                   | EGA3-2           |            |                |           | RHOD   |
| Cell Cycle<br>Control of<br>Chromosomal<br>Replication                  | EGA3-2           |            |                |           | LIG1   |
| Coenzyme A<br>Biosynthesis                                              | EGA3-2           |            | PPCS           |           |        |
| Branched-<br>chain $\alpha$ -keto<br>acid                               |                  |            | DBT            |           |        |
| Dehydrogenase<br>Complex<br>Glutamate<br>Receptor<br>Signaling          | EGA3-2<br>EGA3-4 | HOMER<br>2 |                |           |        |
| Glycine<br>Cleavage<br>Complex<br>Arginine                              | EGA3-1           |            | AMT            |           |        |
| Degradation VI<br>(Arginase 2<br>Pathway)                               | EGA3-1           |            |                |           | OAT    |
| Hypoxia<br>Signaling in the<br>Cardiovascular<br>System                 | EGA3-1           |            |                | P4HB      |        |
| Uridine-5'-<br>phosphate<br>Biosynthesis                                | EGA3-1           |            | UMPS           |           |        |
| Glycine<br>Biosynthesis I                                               | EGA3-1           |            |                |           | SHMT1  |

|                                               |           |      |       |        |      |         |        |        |       |       |
|-----------------------------------------------|-----------|------|-------|--------|------|---------|--------|--------|-------|-------|
| Thyroid Hormone Biosynthesis                  | EGA4-2    |      |       |        |      |         |        |        |       | CTSD  |
| Chondroitin Sulfate Degradation (Metazoa)     | EGA4-1    |      |       |        |      | HEXA    |        |        |       |       |
| Dermatan Sulfate Degradation (Metazoa)        | EGA4-1    |      |       |        |      | HEXA    |        |        |       |       |
| Tyrosine Biosynthesis IV                      | EGA4-1    |      |       |        |      | PCBD1   |        |        |       |       |
| Phenylalanine Degradation I (Aerobic)         | EGA4-1    |      |       |        |      | PCBD1   |        |        |       |       |
| UDP-N-acetyl-D-glucosamine Biosynthesis II    | BL-Down-1 | UAP1 |       |        |      |         |        |        |       |       |
| UDP-N-acetyl-D-galactosamine Biosynthesis II  | BL-Down-1 | UAP1 |       |        |      |         |        |        |       |       |
| Calcium Signaling                             | M-1       |      |       |        |      |         |        |        | CHRNE | CREB5 |
| PAK Signaling                                 | M-1       | MYLK |       |        |      |         |        |        | TPM1  | TP63  |
| Notch Signaling                               | M-1       |      |       |        |      |         |        |        | ITGA5 |       |
| Actin Cytoskeleton Signaling                  | M-3       |      |       |        |      |         |        |        | JAG1  | JAG1  |
| ERK5 Signaling                                | EGA2-1    |      | EP300 |        |      |         |        |        | PSEN1 |       |
| PDGF Signaling                                | EGA2-1    |      |       | PDGFA  |      | PTPN11  |        |        | FGF9  | ITGA4 |
| Neurotrophin/TRK Signaling                    | EGA2-1    |      | EP300 |        |      | PTPN11  |        |        |       |       |
| Sumoylation Pathway                           | EGA2-1    |      | EP300 |        |      |         | SIRT1  |        |       |       |
| Cyclins and Cell Cycle Regulation             | EGA2-1    |      |       | CDK6   |      |         | E2F5   |        |       |       |
| Remodeling of Epithelial Adherens Junctions   | EGA2-1    |      |       | TUBA1B | ACTB |         |        |        |       |       |
| Estrogen Receptor Signaling                   | EGA2-1    |      | EP300 |        |      | TAF11   |        |        |       |       |
| Glucocorticoid Receptor Signaling             | EGA3-2    |      |       |        |      | THRAP3  |        |        |       |       |
| PPAR Signaling                                | EGA3-2    |      |       |        |      | HSP90B1 |        |        | PTGS2 |       |
| Oxidative Phosphorylation                     | EGA3-1    |      |       |        |      | SMARCE1 |        |        |       |       |
| TCA Cycle II (Eukaryotic)                     | EGA3-1    |      |       |        |      | HSP90B1 |        |        | PTGS2 |       |
| Folate Polyglutamylatoin                      | EGA3-1    |      |       |        |      |         | ATP5A1 |        |       |       |
| Folate Transformations I                      | EGA3-1    |      |       |        |      |         | ATP5H  |        |       |       |
| Acetyl-CoA Biosynthesis III (from Citrate)    | EGA3-1    |      |       |        |      |         | ATP5O  |        |       |       |
| Trans trans-farnesyl Diphosphate Biosynthesis | EGA4-3    |      |       |        |      |         | NDUFA4 |        |       |       |
|                                               |           |      |       |        |      |         | NDUFB5 |        |       |       |
|                                               |           |      |       |        |      |         | NDUFA4 |        |       |       |
|                                               |           |      |       |        |      |         | NDUFB4 |        |       |       |
|                                               |           |      |       |        |      |         | MDH2   | MDH2   |       |       |
|                                               |           |      |       |        |      |         | SUCLA2 | SUCLA2 |       |       |
|                                               |           |      |       |        |      |         | SUCLG1 |        |       |       |
|                                               |           |      |       |        |      |         | MTHFD1 |        | SHMT1 |       |
|                                               |           |      |       |        |      |         | MTHFD1 |        | SHMT1 |       |
|                                               |           |      |       |        |      |         | ACLY   | ACLY   |       |       |
|                                               |           |      |       |        |      |         | ID1    | ID1    |       |       |

|                                                                                                 |        |                             |      |                |  |     |                                    |                                                       |                |  |  |                  |                |
|-------------------------------------------------------------------------------------------------|--------|-----------------------------|------|----------------|--|-----|------------------------------------|-------------------------------------------------------|----------------|--|--|------------------|----------------|
| Mevalonate Pathway I Superpathway of Geranylgeranyl diphosphate Biosynthesis I (via Mevalonate) | EGA4-3 |                             |      |                |  | ID1 | ID1                                |                                                       |                |  |  |                  |                |
| Role of JAK1 JAK2 and TYK2 in Interferon Signaling                                              | EGA4-3 |                             |      |                |  |     |                                    |                                                       |                |  |  | NFKB1            | NFKB1          |
| Signaling by Rho Family GTPases                                                                 | EGA4-1 |                             | MYLK |                |  |     |                                    |                                                       |                |  |  | ITGA5            |                |
| Th2 Pathway                                                                                     | M-1    | CD86                        |      |                |  |     |                                    |                                                       |                |  |  | CHD4             | JAG1           |
|                                                                                                 | M-1    |                             |      |                |  |     |                                    |                                                       |                |  |  | JAG1             |                |
| TGF-β Signaling                                                                                 | M-1    | BMP4<br>BMPR1<br>A<br>RUNX2 |      |                |  |     |                                    |                                                       |                |  |  | SMAD2<br>SMAD3   | BMP4<br>SMURF1 |
| D-myo-inositol-5-phosphate Metabolism                                                           | M-1    | PPFIA2                      |      | PPFIA2         |  |     |                                    |                                                       |                |  |  |                  | MTMR2          |
| VDR/RXR Activation                                                                              | M-1    | RUNX2                       |      |                |  |     |                                    |                                                       |                |  |  | IGFBP3<br>IGFBP5 | NCOR2          |
| 3-phosphoinositide Degradation                                                                  | M-1    | PPFIA2                      |      | PPFIA2         |  |     |                                    |                                                       |                |  |  |                  | MTMR2          |
| Huntington's Disease Signaling                                                                  | EGA2-1 |                             |      | APAF1<br>EP300 |  | BAX | ARFIP2<br>PTPN11<br>SGK1           |                                                       |                |  |  |                  |                |
| Pyrimidine Deoxyribonucleotides De Novo Biosynthesis I                                          | EGA2-1 |                             |      | DTY<br>MK      |  |     |                                    |                                                       |                |  |  |                  |                |
| Huntington's Disease Signaling                                                                  | EGA2-2 |                             |      |                |  |     | HSPA5<br>HSPA8                     |                                                       | HSPA5<br>HSPA8 |  |  |                  | HSPA5          |
| Phagosome Maturation                                                                            | EGA2-2 |                             |      |                |  |     |                                    | CTSV                                                  |                |  |  |                  | CTSV<br>LAMP1  |
| Mitochondrial Dysfunction                                                                       | EGA3-1 |                             |      |                |  |     | CPT1B<br>NDUFA4<br>NDUFB5<br>PINK1 | ATP5A1<br>ATP5H<br>ATP5O<br>CPT1B<br>NDUFA4<br>NDUFB4 |                |  |  | GPD2<br>PINK1    |                |
| Mitochondrial L-carnitine Shuttle Pathway                                                       | EGA3-1 |                             |      |                |  |     | CPT1B<br>CPT2                      | ACSL4<br>CPT1B<br>CPT2                                |                |  |  | ACSL4<br>CPT2    |                |
| PCP pathway                                                                                     | EGA4-1 | WNT7A                       |      | WNT7A          |  |     |                                    |                                                       |                |  |  | FZD4             |                |
| Hepatic Fibrosis / Hepatic Stellate Cell Activation                                             | EGA4-2 |                             |      |                |  |     |                                    |                                                       |                |  |  | COL4A1<br>FN1    | FN1            |
| Zymosterol Biosynthesis                                                                         | EGA4-1 |                             |      |                |  |     | CYP51A1<br>1                       | CYP51A1<br>MSMO1                                      |                |  |  |                  | CYP51A1<br>1   |
| Superpathway of Cholesterol Biosynthesis                                                        | EGA4-1 |                             |      |                |  |     | CYP51A1<br>1                       | CYP51A1<br>HMGCS1<br>MSMO1                            |                |  |  |                  | CYP51A1<br>1   |
| Cholesterol Biosynthesis I                                                                      | EGA4-1 |                             |      |                |  |     | CYP51A1<br>1                       | CYP51A1<br>MSMO1                                      |                |  |  |                  | CYP51A1<br>1   |
| Cholesterol Biosynthesis II (via 24 25-dihydrolanosterol)                                       | EGA4-1 |                             |      |                |  |     | CYP51A1<br>1                       | CYP51A1<br>MSMO1                                      |                |  |  |                  | CYP51A1<br>1   |
