# Supplementary material
Source: PubMed Central journal article supplement (PMC6417155)
Supplement: gaz001_schall_et_al._table_s34.pdf [file gaz001_schall_et_al._table_s34.pdf]

Table S34 - IPA maternal upstream regulators targets in affected sub-group biological functions

| Function                                       | Sub-Group | Upstream Regulators |      |                                                     |             |                   |
|------------------------------------------------|-----------|---------------------|------|-----------------------------------------------------|-------------|-------------------|
|                                                |           | PRKCE               | JAG1 | PSEN1                                               | ESR2        | NFKBIA            |
| Ubiquitination                                 | M-1       |                     | CD86 |                                                     |             |                   |
| Phosphorylation of L-amino acid                | M-1       |                     |      |                                                     | IGF1R       |                   |
| Differentiation of vasculature                 | M-1       |                     |      |                                                     | BMP4, JAG1  |                   |
| Formation of actin filaments                   | M-2       | PRKCE, STAT3        |      |                                                     |             |                   |
| Interaction of tumor cell lines                | M-3       |                     |      |                                                     | PRL         |                   |
| Chemotaxis of fibroblasts                      | M-2       | STAT3               |      |                                                     |             |                   |
| Secretion of mucus                             | M-2       |                     |      |                                                     |             | IL10              |
| Density of neurons                             | M-1       |                     |      | DLG4, DYRK1A,<br>GNAO1, PAK1, PSEN1,<br>PSEN2, RYR2 |             |                   |
| Quantity of dendritic spines                   | M-1       |                     |      | DLG4                                                |             |                   |
| Maturation of cells                            | M-3       |                     |      |                                                     | PRL         |                   |
| Accumulation of phospholipid                   | M-1       |                     |      | PAFAH1B2                                            |             |                   |
| Invasion of squamous cell carcinoma cell lines | M-2       |                     |      |                                                     |             | CD82, CLU, ITGAV  |
| Proliferation of lymphatic system cells        | M-3       |                     |      |                                                     | PRL         |                   |
| Pathfinding                                    | M-1       |                     |      | NCAM1                                               |             |                   |
| Pathfinding of neurons                         | M-1       |                     |      | NCAM1                                               |             |                   |
| Frequency of T lymphocytes                     | M-2       |                     |      |                                                     |             | IL10              |
| Activation of endothelial cells                | M-2       |                     |      |                                                     |             | TLR2              |
| Concentration of phosphatidic acid             | M-2       | STAT3               |      |                                                     |             |                   |
| Concentration of phospholipid                  | M-2       | STAT3               |      |                                                     |             |                   |
| Cytostasis of prostate cancer cell lines       | M-1       |                     |      |                                                     | CAV1        |                   |
| Interaction of B lymphocytes                   | M-2       |                     |      |                                                     |             | IL10              |
| Synthesis of steroid                           | M-2       |                     |      |                                                     |             | TLR2              |
| Density of dendritic spines                    | M-1       |                     |      | DLG4, DYRK1A,<br>GNAO1, PAK1, PSEN1,<br>PSEN2, RYR2 |             |                   |
| Clustering of vesicles                         | M-1       |                     |      |                                                     | SYTL4       |                   |
| Proliferation of lymphocytes                   | M-3       |                     |      |                                                     | PRL         |                   |
| Secretion of aldosterone                       | M-2       | PRKD1               |      |                                                     |             |                   |
| Retraction of neurites                         | M-1       |                     |      | PSEN1                                               |             |                   |
| Breakage of double-stranded DNA                | M-1       |                     |      | TOP2B                                               |             |                   |
| Differentiation of skeletal muscle cells       | M-1       |                     |      |                                                     | BMP4        |                   |
| Interaction of lymphocytes                     | M-2       |                     |      |                                                     |             | IL10, RGS16, TLR2 |
| Binding of carcinoma cell lines                | M-1       |                     |      |                                                     | CAV1, SFRP4 |                   |
| Remodeling of blood vessel                     | M-1       |                     |      | NOS1, RBPJ                                          |             |                   |
| Quantity of granulocytes                       | M-3       |                     |      |                                                     | PRL         |                   |
| Concentration of choline-phospholipid          | M-2       | STAT3               |      |                                                     |             |                   |
| Cell proliferation of T lymphocytes            | M-3       |                     |      |                                                     | PRL         |                   |
| Secretion of steroid hormone                   | M-2       | PRKD1               |      |                                                     |             |                   |
| Binding of lymphocytes                         | M-2       |                     |      |                                                     |             | IL10              |
| Cytostasis of carcinoma cell lines             | M-2       | CYR61, STAT3        |      |                                                     |             |                   |
| Proliferation of prostate cancer cell lines    | M-3       |                     |      |                                                     | PRL         |                   |
| Response of fibroblast cell lines              | M-1       |                     |      | PSEN1                                               |             |                   |
| Contraction of muscle cells                    | M-2       | PRKCE, PRKD1        |      |                                                     |             |                   |
| Cell death of blood cells                      | M-3       |                     |      |                                                     | MXD1, PRL   |                   |

|                                                                         |     |       |                   |       |            |
|-------------------------------------------------------------------------|-----|-------|-------------------|-------|------------|
| Response of splenocytes                                                 | M-2 |       |                   |       | IL10, TLR2 |
| Binding of leukocytes                                                   | M-3 |       |                   | PRL   |            |
| Fragmentation of Golgi apparatus                                        | M-2 | PRKD1 |                   |       |            |
| Branching of fibroblast cell lines                                      | M-1 |       | PSEN1             |       |            |
| Aggregation of melanosomes                                              | M-1 |       |                   | SYTL4 |            |
| Contraction of cardiac muscle                                           | M-2 | PRKD1 |                   |       |            |
| Size of dendritic spines                                                | M-1 |       | DLG4              |       |            |
| Mitosis of smooth muscle cells                                          | M-1 |       |                   | BMP4  |            |
| Quantity of tubulovesicular structures                                  | M-1 |       |                   | CAV1  |            |
| Morphology of dendritic spines                                          | M-1 |       | DLG4, PAK1, PSEN1 |       |            |
| Interphase of kidney cell lines                                         | M-1 |       | PSEN2             |       |            |
| Enlargement of third cerebral ventricle                                 | M-1 |       | PSEN1, PSEN2      |       |            |
| Clustering of melanosomes                                               | M-1 |       |                   | SYTL4 |            |
| Function of endothelial cells                                           | M-1 |       |                   | IGF1R |            |
| Function of synapse                                                     | M-1 |       | DLG4, PSEN1       |       |            |
| Formation of somites                                                    | M-1 |       | DLL3              |       |            |
| Quantity of hippocampal neurons                                         | M-1 |       | DLG4, PSEN1       |       |            |
| Remodeling of basement membrane                                         | M-1 |       |                   | TIMP1 |            |
| Stereotypy                                                              | M-1 |       | PAK1              |       |            |
| Conversion of arginine                                                  | M-1 |       | NOS1              |       |            |
| Pigmentation of retinal pigment epithelium                              | M-1 |       | PSEN1, PSEN2      |       |            |
| Migration of neocortical neurons                                        | M-1 |       |                   | BMP4  |            |
| Morphogenesis of ciliary body                                           | M-1 |       |                   | JAG1  |            |
| Shrinkage of cerebral cortex                                            | M-1 |       | PSEN1, PSEN2      |       |            |
| Development of second branchial arch                                    | M-1 |       | PSEN1, PSEN2      |       |            |
| Binding of membrane rafts                                               | M-1 |       | NCAM1             |       |            |
| Formation of excitatory synapses                                        | M-1 |       | DLG4              |       |            |
| Fusion of insulin granule                                               | M-1 |       |                   | SYTL4 |            |
| Survival of kidney cancer cell lines                                    | M-1 |       |                   | IGF1R |            |
| Pathfinding of axons                                                    | M-1 |       | NCAM1             |       |            |
| Gap junctional intercellular communication of neuronal progenitor cells | M-1 |       |                   | CAV1  |            |
| Signaling of vascular smooth muscle cells                               | M-1 |       |                   | IGF1R |            |
| Long term depression of collateral synapses                             | M-1 |       |                   | CAV1  |            |
| Size of thyroid gland                                                   | M-1 |       |                   | IGF1R |            |
| Formation of coronary vessel                                            | M-1 |       | TUBA1C, TUBA4A    |       |            |
| Differentiation of bile duct                                            | M-1 |       |                   | JAG1  |            |
| Rearrangement of cells                                                  | M-1 |       | PAK1              |       |            |
| Arrest in cell cycle progression of sarcoma cell lines                  | M-1 |       |                   | IGF1R |            |
| Cell spreading of endothelial cells                                     | M-2 |       |                   |       | CRYAB      |
| Length of absolute anatomical region                                    | M-2 | CD55  |                   |       |            |
| Apoptosis of skin cancer cell lines                                     | M-2 |       |                   |       | CLU        |

|                                                                   |     |              |             |
|-------------------------------------------------------------------|-----|--------------|-------------|
| Morphology of breast cancer cell lines                            | M-2 |              | NFKBIA      |
| Anoikis of adenocarcinoma cell lines                              | M-2 |              | CD82        |
| Polarization of decidual macrophages                              | M-2 |              | IL10        |
| Inhibition of Th1 cells                                           | M-2 |              | IL10        |
| Myelination of Schwann cells                                      | M-2 |              | NFKBIA      |
| Ploidy of epithelial cells                                        | M-2 |              | CRYAB       |
| Emigration of antigen presenting cells                            | M-2 |              | ITGAV       |
| Release of blood cells                                            | M-2 | PRKCE        |             |
| Cell death of skin cancer cell lines                              | M-2 |              | CLU, NFKBIA |
| Metabolism of adenosine                                           | M-2 |              | IL10        |
| Localization of cholesterol                                       | M-2 |              | CD82        |
| Induction of Th2 cells                                            | M-2 |              | IL10        |
| Inactivation of macrophages                                       | M-2 |              | IL10        |
| Mitogenesis of T lymphocytes                                      | M-2 | IL2RB, STAT3 |             |
| Suppression of helper T lymphocytes                               | M-2 |              | IL10        |
| Frequency of Th1 cells                                            | M-2 |              | IL10        |
| Re-epithelialization                                              | M-2 |              | IL10        |
| Morphogenesis of hair follicle                                    | M-2 |              | NFKBIA      |
| Translocation of L-amino acid                                     | M-2 |              | SLC1A2      |
| Loss of brain cells                                               | M-2 |              | SLC1A2      |
| Writhing                                                          | M-2 |              | IL10        |
| Epithelial-mesenchymal transition of colorectal cancer cell lines | M-2 |              | PDLIM1      |
| Beta-oxidation of very long chain fatty acid                      | M-2 |              | ABCD3       |
| Length of colon                                                   | M-2 | CD55         |             |
| Anoikis of intestinal cell lines                                  | M-2 |              | NFKBIA      |
| Differentiation of M2c macrophages                                | M-2 |              | IL10        |
| Apoptosis of intestinal cell lines                                | M-2 |              | NFKBIA      |
| Apoptosis of BMMC cells                                           | M-2 |              | IL10        |
| Regulation of osteoblasts                                         | M-2 | CYR61        |             |
| Activation of lamellipodia                                        | M-2 | PRKD1        |             |
| Formation of colony forming unit osteoblasts                      | M-2 |              | FHL2        |
| Density of synaptic vesicles                                      | M-2 | PRKCE        |             |
| Formation of palate                                               | M-2 |              | ITGAV       |
| Priming of leukocyte cell lines                                   | M-2 |              | IL10        |
| Adhesion of synovial fibroblasts                                  | M-2 |              | ITGAV       |
| Proliferation of induced regulatory T-lymphocyte                  | M-2 |              | IL10        |
| Morphology of actin cytoskeleton                                  | M-2 |              | PDLIM1      |
| Synthesis of thromboxane B2                                       | M-2 |              | IL10        |
| Arrest in proliferation of leukocytes                             | M-2 |              | IL10        |
| Activation of vascular endothelial tissue                         | M-2 |              | IL10        |
| Morphology of sarcomere                                           | M-2 | PRKD1        |             |
| Morphology of Golgi apparatus                                     | M-2 | PRKD1        |             |
| Morphology of brain cells                                         | M-2 |              | SLC1A2      |
| Survival of plasmacytoid dendritic cells                          | M-2 |              | IL10        |

|                                                       |     |              |              |
|-------------------------------------------------------|-----|--------------|--------------|
| Differentiation of macrophage-like cells              | M-2 |              | IL10         |
| Differentiation of naive B cells                      | M-2 | STAT3        |              |
| Outgrowth of breast cancer cell lines                 | M-2 | CYR61, STAT3 |              |
| Response of bronchial epithelial cells                | M-2 |              | TLR2         |
| Mitogenesis of leukocytes                             | M-2 | IL2RB, STAT3 |              |
| Development of memory natural killer cells            | M-2 | IL2RB, STAT3 |              |
| Synthesis of genomic DNA                              | M-2 |              | NFKBIA       |
| Onset of differentiation of cells                     | M-2 | CYR61        |              |
| Injury of kidney cell lines                           | M-2 |              | CLU          |
| Arrest in proliferation of embryonic cell lines       | M-2 |              | NFKBIA       |
| Stimulation of synovial fibroblasts                   | M-2 |              | IL10         |
| Cell movement of Th2 cells                            | M-2 |              | IL10, RGS16  |
| Beta-oxidation of lignoceric acid                     | M-2 |              | ABCD3        |
| Development of aortic arch                            | M-2 |              | SEMA3C       |
| Quantity of homocysteine                              | M-2 |              | IL10         |
| Development of cerebral cortex                        | M-2 |              | SLC1A2       |
| Fragmentation of nucleus                              | M-2 |              | CLU          |
| Movement of myeloma cell lines                        | M-2 |              | CD82         |
| Morphology of cerebral cortex cells                   | M-2 |              | SLC1A2       |
| Proliferation of bronchial epithelial cells           | M-2 |              | NFKBIA, TLR2 |
| Quantity of cellular inclusion bodies                 | M-2 |              | CRYAB        |
| G1 phase of keratinocytes                             | M-2 |              | NFKBIA       |
| Response of lung cancer cell lines                    | M-2 | STAT3        |              |
| Differentiation of Ab-secreting B cells               | M-2 |              | IL10         |
| Co-stimulation of blood cells                         | M-2 |              | CD82         |
| Induction of PBMCs                                    | M-2 |              | IL10         |
| Induction of naive T lymphocytes                      | M-2 |              | IL10         |
| Demethylation of DNA                                  | M-2 | STAT3        |              |
| Contraction of smooth muscle cells                    | M-2 | PRKCE        |              |
| Translocation of glutamine family amino acid          | M-2 |              | SLC1A2       |
| G1 phase of carcinoma cell lines                      | M-2 | CYR61, PRKCE |              |
| Re-epithelialization of skin                          | M-2 |              | IL10         |
| Polarization of macrophage cancer cell lines          | M-2 |              | IL10         |
| Differentiation of cytotoxic T cells                  | M-2 | IL2RB, STAT3 |              |
| Anoikis of prostate cancer cell lines                 | M-2 |              | CD82         |
| Oversecretion of mucus                                | M-2 |              | IL10         |
| Loss of cerebral cortex cells                         | M-2 |              | SLC1A2       |
| Recruitment of protein                                | M-2 |              | TOLLIP       |
| Contact growth inhibition of kidney cancer cell lines | M-2 | STAT3        |              |
| Apoptosis of trophoblast cells                        | M-2 |              | IL10         |

|                                                     |        |              |            |
|-----------------------------------------------------|--------|--------------|------------|
| Generation of monocyte-derived dendritic cells      | M-2    |              | IL10       |
| Proliferation of memory B cells                     | M-2    |              | IL10       |
| Quantity of Staphylococcus aureus                   | M-2    |              | IL10, TLR2 |
| Sprouting of sensory neurons                        | M-2    |              | NFKBIA     |
| Differentiation of effector cytotoxic T lymphocytes | M-2    | IL2RB, STAT3 |            |
| Generation of Tr1 cells                             | M-2    |              | IL10       |
| Formation of brain                                  | M-3    |              | PRL        |
| Breakage of double-stranded DNA                     | M-3    |              | PRL        |
| Proliferation of mammary duct                       | M-3    |              | PRL        |
| G2/M phase transition of fibroblast cell lines      | M-3    |              | MXD1       |
| Proliferation of mammary alveolus                   | M-3    |              | PRL        |
| Electrical resistance of breast cell lines          | M-3    |              | PRL        |
| Synthesis of steroid hormone                        | M-3    |              | PRL        |
| Binding of hematopoietic progenitor cells           | M-3    |              | PRL        |
| Removal of cystine                                  | M-3    |              | PRL        |
| Budding of lobules of mammary gland                 | M-3    |              | PRL        |
| Generation of actin filaments                       | M-3    |              | PRL        |
| Generation of membrane ruffles                      | M-3    |              | PRL        |
| Regulation of granulosa cells                       | M-3    |              | PRL        |
| Remyelination of posterior funiculus                | M-3    |              | PRL        |
| Enlargement of prostate gland                       | M-3    |              | PRL        |
| Differentiation of mammary gland                    | M-3    |              | PRL        |
| Remyelination                                       | M-3    |              | PRL        |
| Synthesis of pregnenolone                           | M-3    |              | PRL        |
| Morphogenesis of gland                              | M-3    |              | PRL        |
| Synthesis of catecholamine                          | M-3    |              | PRL        |
| Morphology of reproductive system                   | M-3    |              | PRL        |
| Relaxation of artery                                | M-3    |              | PRL        |
| Quantity of intramyocellular lipid store            | M-3    |              | PPP1R3C    |
| S phase of fibroblast cell lines                    | M-3    |              | MXD1       |
| Arborization of mammary duct                        | M-3    |              | PRL        |
| Generation of filaments                             | M-3    |              | PRL        |
| Binding of T lymphocytes                            | M-3    |              | PRL        |
| Branching of mammary gland                          | M-3    |              | PRL        |
| Depletion of polysaccharide                         | M-3    |              | PPP1R3C    |
| Growth of genital organ                             | M-3    |              | PRL        |
| Growth of decidua                                   | M-3    |              | PRL        |
| Isovolumetric relaxation time of left ventricle     | M-3    |              | THBS4      |
| Differentiation of pulmonary alveolus               | M-3    |              | PRL        |
| Duplication of body axis                            | EGA1-1 | LDLR         |            |
| Circulation of daunorubicin                         | EGA1-1 | LDLR         |            |
| Morphology of osteoclasts                           | EGA1-1 | LDLR         |            |
| Quantity of alpha-tocopherol phosphate              | EGA1-1 | LDLR         |            |
| Area of aortic valve                                | EGA1-1 | LDLR         |            |

|                                                                          |        |      |              |
|--------------------------------------------------------------------------|--------|------|--------------|
| Quantity of spirochete                                                   | EGA1-1 | LDLR |              |
| Deficiency of non-plasmacytoid dendritic cells                           | EGA1-1 | LDLR |              |
| Preservation of elastic lamina                                           | EGA1-1 | LDLR |              |
| Conversion of bile acid                                                  | EGA1-1 | LDLR |              |
| Resorption of bone                                                       | EGA1-1 | LDLR |              |
| Thickness of tunica intima                                               | EGA1-1 | LDLR |              |
| Morphology of fibrous cap                                                | EGA1-1 | LDLR |              |
| Quantity of 1-palmitoyl-2-glutaroyl-sn-glycero-3-phosphorylcholine       | EGA1-1 | LDLR |              |
| Function of aortic valve                                                 | EGA1-1 | LDLR |              |
| Quantity of 1-palmitoyl-2-(5-oxovaleroyl)-sn-glycero-3-phosphorylcholine | EGA1-1 | LDLR |              |
| Uptake of lipoprotein                                                    | EGA1-1 | LDLR |              |
| Maturation of connective tissue                                          | EGA2-2 |      | HMOX1        |
| Repair of DNA                                                            | EGA2-2 |      | HMOX1, XRCC5 |
| Quantity of lung tissue                                                  | EGA2-2 |      | HMOX1        |
| Degradation of chromosomes                                               | EGA2-2 |      | XRCC5        |
| Re-entry into M phase of lung cell lines                                 | EGA2-2 |      | XRCC5        |
| Recovery of heart ventricle                                              | EGA2-2 |      | HMOX1        |
| Damage of cellular membrane                                              | EGA2-2 |      | HK2, HMOX1   |
| Oxidative stress response of macrophage cancer cell lines                | EGA2-2 |      | HMOX1        |
| Transmembrane transport of D-glucose                                     | EGA2-2 |      | HK2          |
| Quantity of LH                                                           | EGA2-2 |      | HMOX1        |
| Radiosensitivity of lung cell lines                                      | EGA2-2 |      | XRCC5        |
| Colony formation of Helicobacter pylori 10700                            | EGA2-2 |      | HMOX1        |
| Binding of mitochondria                                                  | EGA2-2 |      | HK2          |
| Quantity of carcinoma cell lines                                         | EGA2-2 |      | HMOX1        |
| Maturation of satellite cells                                            | EGA2-2 |      | HMOX1        |
| Polyploidization of colorectal cancer cell lines                         | EGA2-2 |      | XRCC5        |
| Contraction of arteriole                                                 | EGA2-2 |      | HMOX1        |
| Maturation of osteoclasts                                                | EGA2-2 |      | HMOX1        |
| Healing of gastric mucosa                                                | EGA2-2 |      | HMOX1        |
| Disassembly of actin filaments                                           | EGA2-2 | CAP1 |              |
| Stabilization of chromosomes                                             | EGA2-2 |      | XRCC5        |
| Breakdown of heme                                                        | EGA2-2 |      | HMOX1        |
| Oxidative stress response of melanoma cell lines                         | EGA2-2 |      | HMOX1        |
| Fusion of chromosomes                                                    | EGA2-2 |      | XRCC5        |
| Cell viability of stem cells                                             | EGA2-2 |      | XRCC5        |
| Dissociation of chromosomes                                              | EGA2-2 |      | XRCC5        |
| Stimulation of CD8+ T lymphocyte                                         | EGA2-2 |      | HMOX1        |
| Oxidative stress response of tumor cell lines                            | EGA2-2 |      | HMOX1        |
| S phase of carcinoma cell lines                                          | EGA2-2 |      | HMOX1        |
| Generation of bilirubin                                                  | EGA2-2 |      | HMOX1        |
| Deposition of vascular smooth muscle cells                               | EGA2-2 |      | HMOX1        |
| Accumulation of vascular smooth muscle cells                             | EGA2-2 |      | HMOX1        |

|                                                            |        |       |              |
|------------------------------------------------------------|--------|-------|--------------|
| Quantity of lung cancer cell lines                         | EGA2-2 |       | HMOX1        |
| Double-stranded DNA break repair of cells                  | EGA2-2 |       | XRCC5        |
| S phase of lung cancer cell lines                          | EGA2-2 |       | HMOX1        |
| Apoptosis of gastric mucous cells                          | EGA2-2 |       | HMOX1        |
| Survival of smooth muscle cell lines                       | EGA2-2 |       | HMOX1        |
| Concentration of reactive oxygen species                   | EGA2-2 |       | HMOX1        |
| Cleavage of heme                                           | EGA2-2 |       | HMOX1        |
| Maturation of bone marrow-derived immature dendritic cells | EGA2-2 |       | HMOX1        |
| Maturation of myoblasts                                    | EGA2-2 |       | HMOX1        |
| Formation of gamma H2AX nuclear focus                      | EGA2-2 |       | HMOX1, XRCC5 |
| Injury of mitochondrial membrane                           | EGA2-2 |       | HK2          |
| Radiosensitivity of tumor cell lines                       | EGA2-2 |       | XRCC5        |
| Viability                                                  | EGA2-2 |       | XRCC5        |
| Translocation of chromosomes                               | EGA2-2 |       | XRCC5        |
| Thickness of fibrous cap                                   | EGA2-2 |       | HMOX1        |
| Homeostasis of bilirubin                                   | EGA2-2 |       | HMOX1        |
| Conversion of heme                                         | EGA2-2 |       | HMOX1        |
| Oxidation of heme                                          | EGA2-2 |       | HMOX1        |
| Secretion of taurocholic acid                              | EGA2-2 |       | HMOX1        |
| Phosphorylation of glucose-6-phosphate                     | EGA2-2 |       | HK2          |
| Survival of heart                                          | EGA2-2 |       | HK2, HMOX1   |
| Invasion of stomach cancer cell lines                      | EGA2-4 | FBLN1 |              |
| Invasion of fibroblast cell lines                          | EGA2-4 | FBLN1 |              |
| Formation of kidney                                        | EGA2-4 | FBLN1 |              |
| Metabolism of lamivudine                                   | EGA2-4 | PGK1  |              |
| Formation of pulmonary alveolus                            | EGA2-4 | FBLN1 |              |
| Organization of podocytes                                  | EGA2-4 | FBLN1 |              |
| Colony formation of stomach cancer cell lines              | EGA2-4 | FBLN1 |              |
| Formation of renal glomerulus                              | EGA2-4 | FBLN1 |              |
| Development of tumor cell lines                            | EGA3-4 | ATF3  |              |
| Differentiation of adipocytes                              | EGA3-4 | ATF3  |              |
| Delay in organismal death                                  | EGA3-4 | ATF3  |              |
| Invasion of ovarian cancer cell lines                      | EGA3-4 | ATF3  |              |
| Chemotaxis of vascular smooth muscle cells                 | EGA3-4 | TRIB1 |              |
| Steroidogenesis of hormone                                 | EGA3-4 | ATF3  |              |
| Spermatogenesis                                            | EGA3-4 | RDH10 |              |
| Synthesis of hormone                                       | EGA3-4 | ATF3  |              |
| Colony formation of ovarian cancer cell lines              | EGA3-4 | ATF3  |              |
| Migration of bladder cancer cell lines                     | EGA3-4 | ATF3  |              |
| Conversion of retinol                                      | EGA3-4 | RDH10 |              |
| Formation of testis                                        | EGA3-4 | RDH10 |              |
| Colony formation of fibroblasts                            | EGA3-4 | ATF3  |              |

|                                                 |        |      |  |             |
|-------------------------------------------------|--------|------|--|-------------|
| Adipogenesis of triacylglycerol                 | EGA3-4 |      |  | TRIB1       |
| Regeneration of peripheral nerve                | EGA3-4 |      |  | ATF3        |
| Elongation of neurites                          | EGA3-4 |      |  | ATF3        |
| Mass of epididymal fat                          | EGA3-4 |      |  | TRIB1       |
| Cell movement of vascular smooth muscle cells   | EGA3-4 |      |  | ATF3, TRIB1 |
| Colony survival of lung cancer cell lines       | EGA3-4 |      |  | ATF3        |
| Formation of skin                               | EGA3-4 |      |  | RDH10       |
| Proliferation of vascular smooth muscle cells   | EGA3-4 |      |  | TRIB1       |
| Metabolism of terpenoid                         | EGA3-4 |      |  | ATF3, RDH10 |
| Differentiation of spermatogonia                | EGA3-4 |      |  | RDH10       |
| Development of forelimb                         | EGA3-4 |      |  | RDH10       |
| Apoptosis of fibroblasts                        | EGA3-4 |      |  | ATF3        |
| Development of liver                            | EGA3-4 |      |  | RDH10       |
| Modification of chromatin                       | EGA3-4 |      |  | ATF3        |
| Concentration of cholesterol                    | EGA3-4 |      |  | TRIB1       |
| G1/S phase transition of fibroblasts            | EGA3-4 |      |  | ATF3        |
| Size of atrium                                  | EGA3-4 |      |  | ATF3        |
| Apoptosis of leukocytes                         | EGA3-4 |      |  | ATF3        |
| Function of mitochondria                        | EGA3-4 |      |  | ATF3        |
| Secretion of triacylglycerol                    | EGA3-4 |      |  | ATF3        |
| Morphology of embryonic cell lines              | EGA3-4 |      |  | ATF3        |
| Synthesis of tretinoin                          | EGA3-4 |      |  | RDH10       |
| Tubulogenesis of endothelial cell lines         | EGA3-4 |      |  | ATF3        |
| Apoptosis of bone marrow-derived mast cells     | EGA3-4 |      |  | ATF3        |
| Mass of adipose tissue                          | EGA3-4 |      |  | ATF3, TRIB1 |
| Tubulogenesis                                   | EGA3-4 |      |  | ATF3        |
| Morphology of fibroblast cell lines             | EGA3-4 |      |  | ATF3        |
| Adipogenesis                                    | EGA3-4 |      |  | TRIB1       |
| Conduction of heart                             | EGA3-4 |      |  | ATF3        |
| Excision repair                                 | EGA3-4 |      |  | ATF3        |
| Differentiation of eosinophils                  | EGA3-4 |      |  | TRIB1       |
| Apoptosis of superior cervical ganglion neurons | EGA3-4 |      |  | ATF3        |
| G1/S phase transition                           | EGA3-4 |      |  | ATF3        |
| Development of endocrine region of pancreas     | EGA3-4 |      |  | ATF3        |
| Transport of mitochondria                       | EGA3-4 |      |  | ATF3        |
| Development of digestive system                 | EGA3-4 |      |  | ATF3, RDH10 |
| Cell movement of hepatoma cell lines            | EGA4-1 | SPP1 |  |             |
| Quantity of blood vessel                        | EGA4-1 |      |  | BMP2        |
| Branching of axons                              | EGA4-1 | APP  |  |             |
| Axonogenesis                                    | EGA4-1 | APP  |  |             |
| Cell viability of central nervous system cells  | EGA4-1 | APP  |  |             |
| Quantity of glycosphingolipid                   | EGA4-1 | APP  |  |             |
| Differentiation of oligodendrocytes             | EGA4-1 |      |  | BMP2        |
| Cell viability of brain cells                   | EGA4-1 | APP  |  |             |



|                                                |        |            |      |             |
|------------------------------------------------|--------|------------|------|-------------|
| Quantity of actin filaments                    | EGA4-1 |            | SPP1 |             |
| Metabolism of hydrogen peroxide                | EGA4-1 | APP        |      |             |
| Accumulation of glycosphingolipid              | EGA4-1 | APP        |      |             |
| Apoptosis of bone marrow cell lines            | EGA4-1 |            |      | BMP2        |
| Accumulation of polysaccharide                 | EGA4-1 |            |      | APOA1, BMP2 |
| Quantity of brain cells                        | EGA4-1 | APP        |      |             |
| Apoptosis of pheochromocytoma cell lines       | EGA4-1 | APP        |      |             |
| Signaling of cells                             | EGA4-1 | APP, IL2RG |      |             |
| Synthesis of cartilage matrix                  | EGA4-1 |            |      | BMP2        |
| Mass of skeletal muscle                        | EGA4-1 |            | SPP1 |             |
| Excitation of neurons                          | EGA4-1 | APP        |      |             |
| Neurogenesis of hippocampus                    | EGA4-1 | APP        |      |             |
| Development of chondrocytes                    | EGA4-1 |            |      | BMP2, GRN   |
| Migration of multiple myeloma cells            | EGA4-1 |            | SPP1 |             |
| Inhibition of mRNA                             | EGA4-1 |            |      | BMP2        |
| Distribution of lipid                          | EGA4-1 | APP        |      |             |
| Adhesion of neuroglia                          | EGA4-1 | APP        |      |             |
| Chondrogenesis of fibroblast cell lines        | EGA4-1 |            |      | BMP2, GRN   |
| Catabolism of hydrogen peroxide                | EGA4-1 | APP        |      |             |
| Size of leukocytes                             | EGA4-1 | APP, IL2RG |      |             |
| Chondrogenesis of embryonic cell lines         | EGA4-1 |            |      | BMP2, GRN   |
| Pyknosis                                       | EGA4-1 | APP        |      |             |
| Diameter of cells                              | EGA4-1 |            | SPP1 |             |
| Thickening of basement membrane                | EGA4-1 | APP        |      |             |
| Release of hydrogen peroxide                   | EGA4-1 |            |      | GRN         |
| Recruitment of phospholipid                    | EGA4-1 |            |      | APOA1       |
| Morphology of trabecular bone                  | EGA4-1 |            |      | BMP2        |
| Binding of phospholipid                        | EGA4-1 | APP        |      |             |
| Mass of extensor muscle                        | EGA4-1 |            | SPP1 |             |
| Neurogenesis of brain cells                    | EGA4-1 | APP        |      |             |
| Neuroprotection of tumor cell lines            | EGA4-1 | APP        |      |             |
| Cell viability of vascular smooth muscle cells | EGA4-1 | APP        |      |             |
| Density of microglia                           | EGA4-1 | APP        |      |             |
| Modification of connective tissue              | EGA4-1 |            |      | BMP2, GRN   |
| Accumulation of glycogen                       | EGA4-1 |            |      | APOA1       |
| Mitogenesis of fibroblast cell lines           | EGA4-1 |            |      | BMP2        |
| Density of macrophages                         | EGA4-1 | APP        |      |             |
| Regeneration of bone                           | EGA4-1 |            |      | BMP2, GRN   |
| Diameter of myofiber                           | EGA4-1 |            | SPP1 |             |
| Quantity of neuroblasts                        | EGA4-1 | APP        |      |             |
| Generation of embryonic cell lines             | EGA4-1 |            |      | BMP2, GRN   |
| Quantity of ganglioside GD3                    | EGA4-1 | APP        |      |             |
| Volume of cerebrum                             | EGA4-1 | APP        |      |             |
| Proliferation of cerebral cortex cells         | EGA4-1 |            |      | BMP2        |
| Stimulation of red blood cells                 | EGA4-1 |            |      | BMP2        |

|                                                                          |        |     |      |                |
|--------------------------------------------------------------------------|--------|-----|------|----------------|
| Aggregation of filaments                                                 | EGA4-1 | APP |      |                |
| Movement of endocrine cell lines                                         | EGA4-1 |     | SPP1 |                |
| Surface area of bone                                                     | EGA4-1 | APP |      |                |
| Deposition of proteoglycan                                               | EGA4-1 |     |      | BMP2           |
| Binding of embryonic cell lines                                          | EGA4-1 |     |      | TIMP3          |
| Binding of fibroblasts                                                   | EGA4-1 |     | SPP1 |                |
| Cytotoxicity of neurons                                                  | EGA4-1 | APP |      |                |
| Differentiation of cholinergic neurons                                   | EGA4-1 |     |      | BMP2           |
| Distribution of cholesterol                                              | EGA4-1 | APP |      |                |
| Stimulation of brain cells                                               | EGA4-1 | APP |      |                |
| Context memory                                                           | EGA4-1 | APP |      |                |
| Oxidation of cholesterol                                                 | EGA4-1 | APP |      |                |
| Stimulation of chondrocytes                                              | EGA4-1 |     |      | BMP2           |
| Length of muscle cells                                                   | EGA4-1 |     | SPP1 |                |
| Differentiation of stromal cell lines                                    | EGA4-1 |     |      | BMP2           |
| Morphology of skeletal muscle                                            | EGA4-1 |     | SPP1 |                |
| Area of cells                                                            | EGA4-1 | APP |      |                |
| Growth of metatarsal bone                                                | EGA4-1 |     |      | BMP2, GRN      |
| Cell movement of endothelial cells                                       | EGA4-2 |     |      | ADAMTS1, CDH2  |
| Migration of prostate cancer cell lines                                  | EGA4-2 |     |      | CAPN2          |
| Cell movement of fibrosarcoma cell lines                                 | EGA4-2 |     |      | CDH2           |
| Polarization of cells                                                    | EGA4-2 |     |      | CDH2           |
| Cell movement of sarcoma cell lines                                      | EGA4-2 |     |      | CAPN2, CDH2    |
| Migration of vascular endothelial cells                                  | EGA4-2 |     |      | ADAMTS1        |
| Chemotaxis of tumor cell lines                                           | EGA4-2 |     |      | CAPN2          |
| Extension of cellular protrusions                                        | EGA4-2 |     |      | CDH2           |
| Cell death of trophoblast                                                | EGA4-2 |     |      | CAPN2          |
| Cell death of endothelial cell lines                                     | EGA4-2 |     |      | CDH2, CTSD     |
| Fertility                                                                | EGA4-2 |     |      | ADAMTS1        |
| Aggregation of myoblasts                                                 | EGA4-2 |     |      | CDH2           |
| Tubulation by bone cancer cell lines                                     | EGA4-2 |     |      | ADAMTS1        |
| Quantity of vessel                                                       | EGA4-2 |     |      | ADAMTS1, BMPR2 |
| Thickness of arterial wall                                               | EGA4-2 |     |      | BMPR2          |
| Assembly of fibroblast cell lines                                        | EGA4-2 |     |      | CDH2           |
| Detachment of cells                                                      | EGA4-2 |     |      | CAPN2          |
| Size of heart                                                            | EGA4-2 |     |      | CDH2           |
| Epithelial to mesenchymal transdifferentiation of lung cancer cell lines | EGA4-2 |     |      | BMPR2          |
| Delay in cell death of T lymphocytes                                     | EGA4-2 |     |      | CTSD           |
| Structure of synapse                                                     | EGA4-2 |     |      | CDH2           |
| Collapse of growth cone                                                  | EGA4-2 |     |      | CAPN2          |
| Epithelial to mesenchymal transdifferentiation of carcinoma cell lines   | EGA4-2 |     |      | BMPR2          |
| Shrinkage of fibroblasts                                                 | EGA4-2 |     |      | CTSD           |
| Assembly of ovarian cancer cell lines                                    | EGA4-2 |     |      | CDH2           |

|                                                     |        |                                                                          |                          |
|-----------------------------------------------------|--------|--------------------------------------------------------------------------|--------------------------|
| Development of adrenal medulla                      | EGA4-2 |                                                                          | ADAMTS1                  |
| Migration of bone cancer cell lines                 | EGA4-2 |                                                                          | CAPN2                    |
| Proteolysis of peptide                              | EGA4-2 |                                                                          | CTSD                     |
| Morphogenesis of head                               | EGA4-2 |                                                                          | CDH2                     |
| Binding of mural cells                              | EGA4-2 |                                                                          | CDH2                     |
| Cell movement of neuroblastoma cell lines           | EGA4-2 |                                                                          | CAPN2                    |
| Outgrowth of fibroblasts                            | EGA4-2 |                                                                          | CTSD                     |
| Morphology of vessel component                      | EGA4-2 |                                                                          | BMPR2                    |
| Cell movement of lung cancer cell lines             | EGA4-2 |                                                                          | BMPR2                    |
| Morphology of yolk sac                              | EGA4-2 |                                                                          | CDH2                     |
| Deadhesion of cells                                 | EGA4-2 |                                                                          | CAPN2                    |
| Replication of cells                                | EGA4-2 |                                                                          | CTSD                     |
| Size of renal calyx                                 | EGA4-2 |                                                                          | ADAMTS1                  |
| Size of pericardial cavity                          | EGA4-2 |                                                                          | CDH2                     |
| Transmigration of T lymphocytes                     | EGA4-2 |                                                                          | BMPR2                    |
| Hydrolysis of proteoglycan                          | EGA4-2 |                                                                          | CTSD                     |
| Aggregation of ventricular myocytes                 | EGA4-2 |                                                                          | CDH2                     |
| Innervation of forelimb                             | EGA4-2 |                                                                          | BMPR2                    |
| Morphogenesis of medial ganglionic eminences        | EGA4-2 |                                                                          | CDH2                     |
| Formation of adipose tissue                         | EGA4-2 |                                                                          | ADAMTS1                  |
| Cell spreading of bone cancer cell lines            | EGA4-2 |                                                                          | CAPN2                    |
| Aggregation of cortical neurons                     | EGA4-2 |                                                                          | CDH2                     |
| Accumulation of breast cancer cell lines            | EGA4-2 |                                                                          | BMPR2                    |
| Contact growth inhibition of endothelial cell lines | EGA4-2 |                                                                          | BMPR2                    |
| Angiogenesis of chorioallantoic membrane            | EGA4-2 |                                                                          | ADAMTS1                  |
| Transmigration of lymphocytes                       | EGA4-2 |                                                                          | BMPR2                    |
| Degradation of autophagosomes                       | EGA4-2 |                                                                          | CTSD                     |
| Morphogenesis of kidney                             | EGA4-2 |                                                                          | ADAMTS1                  |
| Formation of connective tissue                      | EGA4-2 |                                                                          | ADAMTS1                  |
| Tubulation by sarcoma cell lines                    | EGA4-2 |                                                                          | ADAMTS1                  |
| Replicative senescence of fibroblast cell lines     | EGA4-4 |                                                                          | NID2                     |
| Formation of plasma membrane                        | M-1    | CTNNB1, DLG4, NCAM1                                                      | CTNNB1, MPP7             |
| Dendritic growth/branching                          | M-1    | CTNNB1, DLG4, DYRK1A, GNAO1, NOS1, PAK1, PSEN1, PSEN2, RELN, RYR2        | CAV1, CTNNB1, RELN       |
| Shape change of neurites                            | M-1    | CTNNB1, DLG4, DYRK1A, GNAO1, NCAM1, NOS1, PAK1, PSEN1, PSEN2, RELN, RYR2 | CAV1, CTNNB1, EGR3, RELN |
| Cognition                                           | M-1    | EGR1, GRIN2A, GRIN2B, NCAM1, PSEN1                                       | EGR1, ESR2, SYNPO        |

|                                                |     |                                  |                                                                          |                                                                 |                         |
|------------------------------------------------|-----|----------------------------------|--------------------------------------------------------------------------|-----------------------------------------------------------------|-------------------------|
| Assembly of intercellular junctions            | M-1 |                                  | CTNNB1, DLG4, NCAM1                                                      | CTNNB1, MPP7                                                    |                         |
| Development of gap junctions                   | M-1 |                                  | CTNNB1, DLG4, NCAM1                                                      | CTNNB1                                                          |                         |
| Shape change of neurons                        | M-1 |                                  | CTNNB1, DLG4, DYRK1A, GNAO1, NCAM1, NOS1, PAK1, PSEN1, PSEN2, RELN, RYR2 | CAV1, CTNNB1, EGR3, RELN                                        |                         |
| Developmental process of synapse               | M-1 |                                  | CTNNB1, DLG4, NCAM1                                                      | CTNNB1                                                          |                         |
| Formation of intercellular junctions           | M-1 |                                  | CTNNB1, DLG4, NCAM1                                                      | CTNNB1, MPP7                                                    |                         |
| Cytostasis                                     | M-1 |                                  | CTNNB1, EGR1, PAK1, RBPJ                                                 | ASB2, BMP4, CAV1, CTNNB1, EGR1, IGF1R, JAG1, MXD1, SFRP4, TIMP1 |                         |
| Formation of cell-cell contacts                | M-1 |                                  | CTNNB1, DLG4, NCAM1                                                      | CTNNB1, MPP7                                                    |                         |
| Migration of neurons                           | M-1 |                                  | CTNNB1, DLG4, NOS1, PSEN1, RELN, TOP2B                                   | BMP4, CTNNB1, IGF1R, RELN                                       |                         |
| Proliferation of lymphatic system cells        | M-2 | CD55, IL2RB, PRKCE, PRKD1, STAT3 |                                                                          |                                                                 | IL10, NFKBIA, TLR2      |
| Migration of smooth muscle cells               | M-2 | CYR61, STAT3                     |                                                                          |                                                                 | CLU, FHL2, TLR2         |
| Formation of brain                             | M-1 |                                  | CTNNB1, DLG4, EGR1, GNAO1, NCAM1, PSEN1, RELN, STXBP1                    | CTNNB1, EGR1, RELN, ST8SIA4                                     |                         |
| Growth of dendrites                            | M-1 |                                  | PAK1, RELN                                                               | CAV1, RELN                                                      |                         |
| Proliferation of immune cells                  | M-2 | CD55, IL2RB, PRKCE, PRKD1, STAT3 |                                                                          |                                                                 | IL10, NFKBIA, TLR2      |
| Proliferation of lymphocytes                   | M-2 | CD55, IL2RB, PRKCE, PRKD1, STAT3 |                                                                          |                                                                 | IL10, NFKBIA, TLR2      |
| Cytostasis of tumor cell lines                 | M-1 |                                  | CTNNB1, EGR1, RBPJ                                                       | BMP4, CAV1, CTNNB1, EGR1, IGF1R, JAG1, MXD1, SFRP4              |                         |
| Long term depression of hippocampal CA1 region | M-1 |                                  | DLG4, GRIN2B, RYR3                                                       | ST8SIA4                                                         |                         |
| Cell proliferation of T lymphocytes            | M-2 | CD55, IL2RB, PRKCE, PRKD1, STAT3 |                                                                          |                                                                 | IL10, NFKBIA, TLR2      |
| NK cell development                            | M-2 | IL2RB, STAT3                     |                                                                          |                                                                 | IL10                    |
| Interaction of tumor cell lines                | M-1 |                                  | CTNNB1, CYTIP, EGR1, NCAM1, PAK1                                         | CAV1, CTNNB1, EGR1, EGR3, IGF1R, IGFBP3, SFRP4                  |                         |
| Production of lymphocytes                      | M-2 | IL2RB                            |                                                                          |                                                                 | NFKBIA                  |
| Differentiation of carcinoma cell lines        | M-1 |                                  | EGR1                                                                     | EGR1                                                            |                         |
| Cell movement of dermal cells                  | M-2 | STAT3                            |                                                                          |                                                                 | ITGAV                   |
| Function of intercellular junctions            | M-1 |                                  | DLG4, PSEN1                                                              | MPP7                                                            |                         |
| Long term depression of CA1 neuron             | M-1 |                                  | DLG4, RYR3                                                               | ST8SIA4                                                         |                         |
| Quantity of vesicles                           | M-1 |                                  | EGR1                                                                     | CAV1, EGR1                                                      |                         |
| Synthesis of eicosanoid                        | M-2 | PRKD1, STAT3                     |                                                                          |                                                                 | CLU, IL10, NFKBIA, TLR2 |
| Quantity of endocrine cells                    | M-1 |                                  | CTNNB1                                                                   | CTNNB1, IGF1R                                                   |                         |
| Concentration of acylglycerol                  | M-2 | PRKCE                            |                                                                          |                                                                 | IL10                    |

|                                                       |     |              |                      |                                         |                      |
|-------------------------------------------------------|-----|--------------|----------------------|-----------------------------------------|----------------------|
| Formation of actin filaments                          | M-1 |              | GNAO1, GNG2, PAK1    | BMP4, CAV1, JAG1, TPM1                  |                      |
| Differentiation of germ cell tumor cell lines         | M-1 |              | EGR1                 | EGR1                                    |                      |
| Cell movement of keratinocytes                        | M-2 | STAT3        |                      |                                         | ITGAV                |
| Analgesia                                             | M-2 | PRKCE        |                      |                                         | IL10                 |
| Adhesion of vascular endothelial cells                | M-2 | CYR61        |                      |                                         | NFKBIA               |
| Migration of central nervous system cells             | M-1 |              | RELN                 | BMP4, IGF1R, RELN, ST8SIA4              |                      |
| Contact growth inhibition                             | M-1 |              | CTNNB1, EGR1, PAK1   | BMP4, CTNNB1, EGR1, IGF1R, MXD1, TIMP1  |                      |
| NK cell proliferation                                 | M-2 | IL2RB, STAT3 |                      |                                         | IL10                 |
| Cell movement of fibroblasts                          | M-1 |              | CTNNB1, ENPP2        | CAV1, CTNNB1, ENPP2                     |                      |
| Cell cycle progression of tumor cell lines            | M-1 |              | EGR1, PSEN1, PSEN2   | BMP4, CAV1, EGR1, IGF1R, IGFBP3         |                      |
| Adhesion of breast cancer cell lines                  | M-1 |              | PAK1                 | IGF1R                                   |                      |
| Recombination                                         | M-1 |              | RELN                 | RELN                                    |                      |
| Quantity of interneurons                              | M-1 |              | GNAO1                | ESR2                                    |                      |
| Migration of brain cells                              | M-1 |              | RELN                 | BMP4, IGF1R, RELN, ST8SIA4              |                      |
| Contact growth inhibition of tumor cell lines         | M-1 |              | CTNNB1, EGR1         | BMP4, CTNNB1, EGR1, IGF1R, MXD1         |                      |
| Apoptosis of synovial cells                           | M-2 | STAT3        |                      |                                         | CLU, NFKBIA, TNFAIP8 |
| Synthesis of prostaglandin                            | M-2 | PRKD1, STAT3 |                      |                                         | CLU, IL10, NFKBIA    |
| Cell death of germ cells                              | M-1 |              | EGR1                 | EGR1, IGFBP3                            |                      |
| Cell death of lymphoma cell lines                     | M-2 | CD55, STAT3  |                      |                                         | IL10, NFKBIA         |
| Cell cycle progression of fibroblast cell lines       | M-1 |              | RUNX2                | CAV1, MXD1, RUNX2                       |                      |
| Adhesion of epithelial cells                          | M-2 | STAT3        |                      |                                         | CLU, ITGAV           |
| Cell movement of brain cells                          | M-1 |              | RELN                 | BMP4, IGF1R, RELN, ST8SIA4, TIMP1       |                      |
| Cytostasis of breast cancer cell lines                | M-1 |              | CTNNB1               | CTNNB1, IGF1R                           |                      |
| Destabilization of microtubules                       | M-1 |              | EGR1                 | EGR1                                    |                      |
| Respiratory system development                        | M-1 |              | CTNNB1, GNAO1        | BMP4, CAV1, CTNNB1, ESR2                |                      |
| Aggregation of tumor cell lines                       | M-1 |              | CTNNB1, NCAM1        | CTNNB1, IGF1R                           |                      |
| Cell movement of central nervous system cells         | M-1 |              | RELN                 | BMP4, CAV1, IGF1R, RELN, ST8SIA4, TIMP1 |                      |
| Cell death of gonadal cells                           | M-1 |              | CTNNB1, EGR1         | CTNNB1, EGR1, IGFBP3                    |                      |
| Permeability of vascular system                       | M-1 |              | CTNNB1, GNAO1, PAK1  | CTNNB1                                  |                      |
| Incorporation of amino acids                          | M-1 |              | RELN                 | IGFBP3, RELN                            |                      |
| Migration of ovarian cancer cell lines                | M-1 |              | PAK1                 | ESR2, SFRP4                             |                      |
| Contact growth inhibition of breast cancer cell lines | M-1 |              | CTNNB1               | CTNNB1, IGF1R                           |                      |
| Proliferation of synovial cells                       | M-2 | CYR61, STAT3 |                      |                                         | IL10, TNFAIP8        |
| Quantity of amino acids                               | M-2 | PRKCE        |                      |                                         | IL10, SLC1A2         |
| Interphase of cervical cancer cell lines              | M-1 |              | CTNNB1, PSEN1, PSEN2 | CTNNB1                                  |                      |

|                                              |     |              |                                                      |                                             |                             |
|----------------------------------------------|-----|--------------|------------------------------------------------------|---------------------------------------------|-----------------------------|
| Quantity of focal adhesions                  | M-1 |              | CTNNB1                                               | CAV1, CTNNB1, TIMP1                         |                             |
| Senescence of epithelial cell lines          | M-1 |              | CTNNB1                                               | BMP4, CTNNB1                                |                             |
| Release of nitric oxide                      | M-2 | STAT3        |                                                      |                                             | TLR2, TOLLIP                |
| Development of body axis                     | M-2 | STAT3        |                                                      |                                             | CRYAB, NFKBIA, SLC1A2, TLR2 |
| Development of regulatory T lymphocytes      | M-2 | IL2RB, STAT3 |                                                      |                                             | IL10, NFKBIA, TLR2          |
| Relaxation of muscle                         | M-1 |              | NOS1                                                 | TPM1                                        |                             |
| Cell-cell adhesion                           | M-1 |              | CTNNB1, PSEN1                                        | CTNNB1, TIMP1                               |                             |
| Disruption of actin cytoskeleton             | M-1 |              | HLA-E                                                | CAV1, IGF1R                                 |                             |
| Quantity of pulmonary alveolus               | M-1 |              | RUNX2                                                | ESR2, RUNX2                                 |                             |
| Apoptosis of hepatoma cell lines             | M-2 | STAT3        |                                                      |                                             | CLU, NFKBIA, SPOCK1         |
| Response of CD4+ T-lymphocytes               | M-2 | STAT3        |                                                      |                                             | IL10                        |
| Production of protein                        | M-2 | PRKCE, STAT3 |                                                      |                                             | IL10, NFKBIA, TLR2          |
| Production of cytokine                       | M-2 | PRKCE, STAT3 |                                                      |                                             | IL10, TLR2                  |
| Cell death of fibroblasts                    | M-2 | STAT3        |                                                      |                                             | CLU, IL10, NFKBIA, TNFAIP8  |
| Necrosis of prostate cancer cell lines       | M-2 | PRKCE, STAT3 |                                                      |                                             | CD82, CLU, NFKBIA           |
| Quantity of alveolar epithelium              | M-1 |              | RUNX2                                                | ESR2, RUNX2                                 |                             |
| Arrest in G2 phase of skin cancer cell lines | M-1 |              | CTNNB1                                               | CTNNB1                                      |                             |
| Patterning of vessel                         | M-1 |              | CTNNB1                                               | CTNNB1                                      |                             |
| Metabolism by thymocytes                     | M-1 |              | EGR1                                                 | EGR1, EGR3                                  |                             |
| Cell-cell adhesion of breast cell lines      | M-1 |              | CTNNB1                                               | CTNNB1                                      |                             |
| Morphology of right ventricle                | M-1 |              | HEY2                                                 | CAV1                                        |                             |
| Formation of microspikes                     | M-1 |              | GNAO1                                                | VAV3                                        |                             |
| Morphology of nervous system                 | M-1 |              | CTNNB1, DLG4, DYRK1A, EGR1, NCAM1, PAK1, PSEN1, RELN | BMP4, CTNNB1, EGR1, EGR3, ESR2, IGF1R, RELN |                             |
| Quantity of neurofibrillary tangles          | M-1 |              | PSEN1, RELN                                          | RELN                                        |                             |
| Synapsis                                     | M-1 |              | RELN                                                 | RELN                                        |                             |
| Patterning of embryo                         | M-1 |              | CTNNB1, PSEN1, PSEN2                                 | CTNNB1                                      |                             |
| Cell-cell adhesion of kidney cell lines      | M-1 |              | CTNNB1                                               | CTNNB1, TIMP1                               |                             |
| Morphology of exocrine cells                 | M-1 |              | CTNNB1                                               | CAV1, CTNNB1                                |                             |
| Conversion of choline-phospholipid           | M-1 |              | ENPP2                                                | ENPP2                                       |                             |
| Development of extraembryonic ectoderm       | M-1 |              | CTNNB1                                               | CTNNB1                                      |                             |
| Delay in growth of organism                  | M-1 |              | DYRK1A                                               | ST8SIA4                                     |                             |
| Formation of occipital bone                  | M-1 |              | RUNX2                                                | RUNX2                                       |                             |
| Differentiation of hair cells                | M-1 |              | CTNNB1                                               | CTNNB1                                      |                             |
| Volume of trabecular bone                    | M-1 |              | HEY2                                                 | NOS1                                        |                             |
| Homing of helper T lymphocytes               | M-2 | STAT3        |                                                      |                                             | IL10                        |
| Morphology of tumor cell lines               | M-2 | PRKCE, STAT3 |                                                      |                                             | CLU, NFKBIA                 |
| G1 phase of epidermal cells                  | M-2 | STAT3        |                                                      |                                             | NFKBIA                      |
| Cell viability of hippocampal neurons        | M-2 | STAT3        |                                                      |                                             | NFKBIA                      |
| Production of mucus                          | M-2 | STAT3        |                                                      |                                             | NFKBIA                      |
| G1/S phase transition of epidermal cells     | M-2 | STAT3        |                                                      |                                             | NFKBIA                      |

|                                                            |        |              |            |             |
|------------------------------------------------------------|--------|--------------|------------|-------------|
| Apoptosis of endometrial cancer cell lines                 | M-2    | CYR61        |            | IL10        |
| Killing of Leishmania major                                | M-2    | PRKCE        |            | IL10        |
| Suppression of bone marrow-derived dendritic cells         | M-2    | STAT3        |            | IL10        |
| Cell movement of helper T lymphocytes                      | M-2    | STAT3        |            | IL10, RGS16 |
| Cell movement of prostate cell lines                       | M-2    | CYR61, STAT3 |            | CLU         |
| Induction of antigen presenting cells                      | M-2    | CYR61        |            | IL10        |
| Development of artery                                      | M-2    | STAT3        |            | SEMA3C      |
| Catabolism of D-glucose                                    | EGA1-1 | MYC          | MYC        |             |
| Myelination of central nervous system                      | EGA1-1 | MYC          | MYC        |             |
| G1 phase of lung cell lines                                | EGA1-1 | MYC          | MYC        |             |
| Arrest in cell cycle progression of B lymphocytes          | EGA1-1 | MYC          | MYC        |             |
| Delay in cell cycle progression of fibroblast cell lines   | EGA1-1 | MYC          | MYC        |             |
| Entry into mitosis of fibroblast cell lines                | EGA1-1 | MYC          | MYC        |             |
| Entry into cell cycle progression of fibroblast cell lines | EGA1-1 | CCND1, MYC   | CCND1, MYC |             |
| Entry into S phase of epithelial cell lines                | EGA1-1 | CCND1, MYC   | CCND1, MYC |             |
| Size of hepatocytes                                        | EGA1-1 | CCND1, MYC   | CCND1, MYC |             |
| Rearrangement of chromosomes                               | EGA1-1 | MYC          | MYC        |             |
| Cloning of cells                                           | EGA1-1 | CCND1, MYC   | CCND1, MYC |             |
| Delay in cell cycle progression                            | EGA1-1 | MYC          | MYC        |             |
| G1 phase of fibroblast cell lines                          | EGA1-1 | CCND1, MYC   | CCND1, MYC |             |
| Apoptosis of squamous cell carcinoma cell lines            | EGA1-1 | CCND1, MYC   | CCND1, MYC |             |
| Stimulation of fibroblast cell lines                       | EGA1-1 | CCND1, MYC   | CCND1, MYC |             |
| Colony survival of tumor cell lines                        | EGA1-1 | CCND1        | CCND1      |             |
| Arrest in proliferation of lung cell lines                 | EGA1-1 | MYC          | MYC        |             |
| Repair of cervical cancer cell lines                       | EGA1-1 | CCND1        | CCND1      |             |
| Transcription of mRNA                                      | EGA1-1 | LDLR, MYC    | MYC        |             |
| G1 phase of kidney cell lines                              | EGA1-1 | CCND1, MYC   | CCND1, MYC |             |
| Size of tumor cell lines                                   | EGA1-1 | CCND1, MYC   | CCND1, MYC |             |
| Accumulation of tumor cell lines                           | EGA1-1 | CCND1        | CCND1      |             |
| Synthesis of rRNA                                          | EGA1-1 | MYC          | MYC        |             |
| Cell survival of tumor cell lines                          | EGA1-1 | CCND1        | CCND1      |             |
| Depletion of ATP                                           | EGA1-1 | MYC          | MYC        |             |
| Proliferation of synovial fibroblasts                      | EGA1-1 | CCND1, MYC   | CCND1, MYC |             |
| Incorporation of octanoic acid                             | EGA1-1 | MYC          | MYC        |             |
| G1 phase of uterine cell lines                             | EGA1-1 | CCND1        | CCND1      |             |
| Ploidy of keratinocytes                                    | EGA1-1 | MYC          | MYC        |             |
| Cloning of melanoma cell lines                             | EGA1-1 | MYC          | MYC        |             |
| Gene amplification of B-lymphocyte derived cell lines      | EGA1-1 | MYC          | MYC        |             |
| Mitosis of Schwann cells                                   | EGA1-1 | CCND1        | CCND1      |             |
| Size of lymphatic sinus                                    | EGA1-1 | MYC          | MYC        |             |

|                                                           |        |            |            |
|-----------------------------------------------------------|--------|------------|------------|
| Entrance of DNA                                           | EGA1-1 | MYC        | MYC        |
| Entry into S phase of melanoma cell lines                 | EGA1-1 | CCND1      | CCND1      |
| Polyploidization of B-lymphocyte derived cell lines       | EGA1-1 | MYC        | MYC        |
| Formation of extrachromosomal cores                       | EGA1-1 | MYC        | MYC        |
| Flow of lymphatic fluid                                   | EGA1-1 | MYC        | MYC        |
| Quantity of lymphatic sinus                               | EGA1-1 | MYC        | MYC        |
| Initiation of differentiation of epidermal cells          | EGA1-1 | MYC        | MYC        |
| Proliferation of photoreceptors                           | EGA1-1 | CCND1      | CCND1      |
| Replicative senescence of ovarian cancer cell lines       | EGA1-1 | MYC        | MYC        |
| Killing of B cell hybridoma cells                         | EGA1-1 | MYC        | MYC        |
| Formation of replication fork                             | EGA1-1 | MYC        | MYC        |
| Arrest in G1/S phase transition of endothelial cell lines | EGA1-1 | MYC        | MYC        |
| Cell division of lymphoma cell lines                      | EGA1-1 | MYC        | MYC        |
| Delay in G1/S phase transition of chondrocytes            | EGA1-1 | CCND1      | CCND1      |
| Elimination of leukemia cell lines                        | EGA1-1 | MYC        | MYC        |
| Immortalization of leukocyte cell lines                   | EGA1-1 | MYC        | MYC        |
| Arrest in G1/S phase transition of breast cell lines      | EGA1-1 | MYC        | MYC        |
| Maturation of lymphatic system cells                      | EGA1-1 | CCND1, MYC | CCND1, MYC |
| Activation of mitochondria                                | EGA1-1 | CCND1, MYC | CCND1, MYC |
| Arrest in G2/M phase transition                           | EGA1-1 | CCND1, MYC | CCND1, MYC |
| Entry into S phase of fibroblasts                         | EGA1-1 | CCND1, MYC | CCND1, MYC |
| Interphase of melanoma cell lines                         | EGA1-1 | CCND1, MYC | CCND1, MYC |
| Morphology of mitotic spindle                             | EGA1-1 | CCND1      | CCND1      |
| Entry into S phase of fibroblast cell lines               | EGA1-1 | CCND1, MYC | CCND1, MYC |
| Accumulation of glutamine                                 | EGA1-1 | MYC        | MYC        |
| Catabolism of glutamine                                   | EGA1-1 | MYC        | MYC        |
| DNA damage response of colorectal cancer cell lines       | EGA1-1 | CCND1      | CCND1      |
| Differentiation of cholangiocarcinoma cell lines          | EGA1-1 | MYC        | MYC        |
| Arrest in G2/M phase transition of keratinocytes          | EGA1-1 | MYC        | MYC        |
| Senescence of B lymphocytes                               | EGA1-1 | MYC        | MYC        |
| Reactivation of fibroblasts                               | EGA1-1 | CCND1      | CCND1      |
| Entry into S phase of intestinal cell lines               | EGA1-1 | CCND1      | CCND1      |
| Initiation of alveolization                               | EGA1-1 | CCND1      | CCND1      |
| Arrest in G0/G1 phase transition of endothelial cells     | EGA1-1 | CCND1      | CCND1      |
| Accumulation of skin cancer cell lines                    | EGA1-1 | CCND1      | CCND1      |
| Beta-oxidation of octanoic acid                           | EGA1-1 | MYC        | MYC        |
| Expansion of pro-B lymphocytes                            | EGA1-1 | MYC        | MYC        |
| Radioresistance of hepatoma cell lines                    | EGA1-1 | CCND1      | CCND1      |
| Cloning of fibroblast cell lines                          | EGA1-1 | CCND1      | CCND1      |



|                                                                          |        |            |            |
|--------------------------------------------------------------------------|--------|------------|------------|
| Mid-G1 phase                                                             | EGA1-1 | MYC        | MYC        |
| Arrest in G0/G1 phase transition of rhabdoid cell lines                  | EGA1-1 | CCND1      | CCND1      |
| Termination of cell cycle progression of fibroblasts                     | EGA1-1 | MYC        | MYC        |
| Senescence of B-lymphoid cells                                           | EGA1-1 | MYC        | MYC        |
| Radioresistance of cervical cancer cell lines                            | EGA1-1 | CCND1      | CCND1      |
| Killing of macrophage cancer cell lines                                  | EGA1-1 | MYC        | MYC        |
| Accumulation of colonocytes                                              | EGA1-1 | MYC        | MYC        |
| Cell cycle progression of brain cancer cell lines                        | EGA1-1 | MYC        | MYC        |
| Size of brain cancer cell lines                                          | EGA1-1 | MYC        | MYC        |
| Arrest in G1 phase of embryonic cell lines                               | EGA1-1 | CCND1, MYC | CCND1, MYC |
| Arrest in interphase of kidney cell lines                                | EGA1-1 | CCND1, MYC | CCND1, MYC |
| Mass of mitochondria                                                     | EGA1-1 | CCND1, MYC | CCND1, MYC |
| Proliferation of lung cell lines                                         | EGA1-1 | MYC        | MYC        |
| G1 phase of fibroblasts                                                  | EGA1-1 | CCND1, MYC | CCND1, MYC |
| Size of lymphatic system cells                                           | EGA1-1 | CCND1, MYC | CCND1, MYC |
| Maturation of lymphocytes                                                | EGA1-1 | MYC        | MYC        |
| Delay in initiation of differentiation of induced pluripotent stem cells | EGA1-1 | MYC        | MYC        |
| Deletion of chromosomes                                                  | EGA1-1 | MYC        | MYC        |
| Colony survival of lymphoma cell lines                                   | EGA1-1 | CCND1      | CCND1      |
| Stimulation of embryonic cell lines                                      | EGA1-1 | MYC        | MYC        |
| Synthesis of acetyl-coenzyme A                                           | EGA1-1 | MYC        | MYC        |
| Size of lymphoma cell lines                                              | EGA1-1 | MYC        | MYC        |
| Cell polarity formation of colorectal cancer cell lines                  | EGA1-1 | MYC        | MYC        |
| Arrest in G1 phase of erythroblasts                                      | EGA1-1 | MYC        | MYC        |
| Homologous recombination repair of cervical cancer cell lines            | EGA1-1 | CCND1      | CCND1      |
| Delay in cell cycle progression of epithelial cell lines                 | EGA1-1 | MYC        | MYC        |
| Poly(ADP-ribosyl)ation of protein                                        | EGA1-1 | MYC        | MYC        |
| Arrest in cell cycle progression of hepatocytes                          | EGA1-1 | CCND1      | CCND1      |
| Outgrowth of ovarian cancer cell lines                                   | EGA1-1 | CCND1      | CCND1      |
| Development of organ of Corti                                            | EGA1-1 | MYC        | MYC        |
| Homing of inflammatory leukocytes                                        | EGA1-1 | MYC        | MYC        |
| Cell cycle progression of skeletal muscle satellite cells                | EGA1-1 | CCND1      | CCND1      |
| Differentiation of sebocytes                                             | EGA1-1 | MYC        | MYC        |
| Initiation of S phase                                                    | EGA1-1 | CCND1, MYC | CCND1, MYC |
| Expansion of hematopoietic progenitor cells                              | EGA1-1 | CCND1, MYC | CCND1, MYC |
| Meiotic nondisjunction                                                   | EGA1-1 | CCND1, MYC | CCND1, MYC |
| Self-renewal of cells                                                    | EGA1-1 | MYC        | MYC        |
| Cell death of sarcoma cell lines                                         | EGA2-2 |            |            |

|                                                 |        |            |               |               |                    |
|-------------------------------------------------|--------|------------|---------------|---------------|--------------------|
| Synthesis of protein                            | EGA2-2 |            | HSPA5         |               | HSPA5              |
| Translation                                     | EGA2-2 |            | HSPA5         |               | HSPA5              |
| Cell death of immune cells                      | EGA2-4 |            | PMAIP1        | PMAIP1        |                    |
| Cell proliferation of carcinoma cell lines      | EGA2-2 |            | YWHAZ         |               | HK2, HMOX1, YWHAZ  |
| Cell viability of mast cells                    | EGA2-2 |            | YWHAZ         |               | YWHAZ              |
| Cell viability of leukemia cell lines           | EGA2-2 |            | HSPA5         |               | HSPA5              |
| Folding of protein                              | EGA2-2 |            | HSPA5, HSPA8  |               | HSPA5, HSPA8       |
| Import of DNA                                   | EGA2-2 |            | HSPA8         |               | HSPA8              |
| Cell viability of leukocyte cell lines          | EGA2-2 |            | YWHAZ         |               | HMOX1, YWHAZ       |
| Stress response of tumor cell lines             | EGA2-2 |            | HSPA5         |               | HMOX1, HSPA5       |
| Cell viability of endothelial cells             | EGA2-2 |            | HSPA5         |               | HMOX1, HSPA5       |
| Permeability transition of mitochondria         | EGA2-2 |            | HSPA5         |               | HSPA5              |
| Dissociation of vesicles                        | EGA2-2 |            | HSPA8         |               | HSPA8              |
| Synthesis of neurotransmitter                   | EGA2-2 |            | YWHAZ         |               | YWHAZ              |
| Binding of ribosome                             | EGA2-2 |            | HSPA5         |               | HSPA5              |
| Concentration of linoleic acid                  | EGA2-2 |            | HSPA5         |               | HSPA5              |
| Transport of calcifediol                        | EGA2-2 |            | HSPA8         |               | HSPA8              |
| Uptake of calcifediol                           | EGA2-2 |            | HSPA8         |               | HSPA8              |
| Differentiation of embryonic tissue             | EGA2-4 |            | HAND1         | HAND1         |                    |
| Cell death of ovarian cancer cell lines         | EGA2-4 |            | PMAIP1        | PMAIP1        |                    |
| Mitochondrial membrane potential                | EGA2-4 |            | PMAIP1        | PMAIP1        |                    |
| Opening of permeability transition pores        | EGA2-4 |            | PMAIP1        | PMAIP1        |                    |
| Recruitment of vascular smooth muscle cells     | EGA2-4 |            | HAND1         | HAND1         |                    |
| Apoptosis of B-lymphocyte derived cell lines    | EGA2-4 |            | PMAIP1        | PMAIP1        |                    |
| Quantity of colorectal cancer cell lines        | EGA2-4 |            | PMAIP1        | PMAIP1        |                    |
| Expansion of natural killer cells               | EGA2-4 |            | PMAIP1        | PMAIP1        |                    |
| Remodeling of heart                             | EGA2-4 |            | HAND1         | HAND1         |                    |
| Cell viability of germ cell tumor cell lines    | EGA2-4 |            | PMAIP1        | PMAIP1        |                    |
| Cell death of heart tissue                      | EGA2-4 |            | HAND1         | HAND1         |                    |
| Development of interventricular sulcus          | EGA2-4 |            | HAND1         | HAND1         |                    |
| Sudden death                                    | EGA2-4 |            | HAND1         | HAND1         |                    |
| Development of lateral plate mesoderm           | EGA2-4 |            | HAND1         | HAND1         |                    |
| Transmembrane potential of mitochondria         | EGA2-4 |            | HAND1, PMAIP1 | HAND1, PMAIP1 |                    |
| Apoptosis of germ cell tumor cell lines         | EGA2-4 |            | PMAIP1        | PMAIP1        |                    |
| Development of trophoblast cells                | EGA2-4 |            | HAND1         | HAND1         |                    |
| Cell death of thymocytes                        | EGA2-4 |            | PMAIP1        | PMAIP1        |                    |
| Differentiation of ectoderm                     | EGA2-4 |            | HAND1         | HAND1         |                    |
| Fatty acid metabolism                           | EGA4-1 | APP, NFKB1 |               |               | APOA1, BMP2, NFKB1 |
| Differentiation of central nervous system cells | EGA4-1 | APP        |               |               | BMP2               |
| Quantity of neurites                            | EGA4-1 | APP        |               |               | BMP2               |

|                                              |        |            |             |                                                                                      |
|----------------------------------------------|--------|------------|-------------|--------------------------------------------------------------------------------------|
| Differentiation of brain cells               | EGA4-1 | APP        |             | BMP2                                                                                 |
| Proliferation of chondrocytes                | EGA4-1 | NFKB1      |             | BMP2, GRN, NFKB1                                                                     |
| Cell movement of endothelial cells           | EGA4-1 |            | SPP1        | BMP2, GRN, TIMP3                                                                     |
| Limb development                             | EGA4-1 | APP        |             | BMP2, COL1A2, GRN                                                                    |
| Tyrosine phosphorylation of protein          | EGA4-1 | APP        | SPP1        |                                                                                      |
| Growth of limb                               | EGA4-1 | APP        |             | BMP2, GRN                                                                            |
| Fusion of vesicles                           | EGA4-1 | APP        | SPP1        |                                                                                      |
| Binding of fibroblast cell lines             | EGA4-1 | IL2RG      | SPP1        |                                                                                      |
| Quantity of smooth muscle cells              | EGA4-1 | APP        |             | TIMP3                                                                                |
| Quantity of filaments                        | EGA4-1 | APP        | SPP1        |                                                                                      |
| Homeostasis of ion                           | EGA4-1 | APP, NFKB1 |             | NFKB1                                                                                |
| Cell death of eye cells                      | EGA4-1 | APP        |             | TIMP3                                                                                |
| Quantity of muscle                           | EGA4-1 | APP        |             | APOA1, TIMP3                                                                         |
| Accumulation of carbohydrate                 | EGA4-1 | APP        |             | APOA1, BMP2                                                                          |
| Cell death of retinal cells                  | EGA4-1 | APP        |             | TIMP3                                                                                |
| Transport of metal                           | EGA4-1 | APP        |             | BMP2                                                                                 |
| Colony formation of breast cancer cell lines | EGA4-1 |            | DUSP6, SPP1 | DUSP6, GRN                                                                           |
| Cellular infiltration by lymphocytes         | EGA4-1 | APP, NFKB1 |             | APOA1, NFKB1, TIMP3                                                                  |
| Steroid metabolism                           | EGA4-1 | APP        |             | APOA1, BMP2                                                                          |
| Proliferation of brain cells                 | EGA4-1 | APP        |             | BMP2                                                                                 |
| Release of cholesterol                       | EGA4-1 | APP        |             | APOA1                                                                                |
| Morphology of vessel                         | EGA4-1 | APP        | SPP1        |                                                                                      |
| Morphology of blood vessel                   | EGA4-1 | APP        | SPP1        |                                                                                      |
| Homeostasis of neurons                       | EGA4-1 | APP, NFKB1 |             | NFKB1                                                                                |
| Morphology of cellular protrusions           | EGA4-1 | APP        |             | BMP2, GRN                                                                            |
| Active avoidance response                    | EGA4-1 | APP, NFKB1 |             | NFKB1                                                                                |
| Morphology of neurons                        | EGA4-1 | APP, NFKB1 |             | BMP2, GRN, NFKB1                                                                     |
| Metabolism of cholesterol                    | EGA4-1 | APP        |             | APOA1                                                                                |
| Attachment of connective tissue cells        | EGA4-1 |            | SPP1        | BMP2                                                                                 |
| Activation of osteoblasts                    | EGA4-1 |            | SPP1        | BMP2                                                                                 |
| Quantity of osteoblasts                      | EGA4-1 | NFKB1      |             | NFKB1                                                                                |
| Binding of cholesterol                       | EGA4-1 | APP        |             | APOA1                                                                                |
| Homeostasis of Ca <sup>2+</sup>              | EGA4-1 | APP, NFKB1 |             | NFKB1                                                                                |
| Damage of tumor cell lines                   | EGA4-1 | APP        | SPP1        |                                                                                      |
| Density of synapse                           | EGA4-1 | APP        |             | GRN                                                                                  |
| Storage of glycogen                          | EGA4-1 | APP        |             | BMP2                                                                                 |
| Adhesion of smooth muscle cells              | EGA4-1 | APP        | SPP1        |                                                                                      |
| Cell viability of muscle cells               | EGA4-1 | APP        |             | BMP2                                                                                 |
| Anxiety-like behavior                        | EGA4-1 | APP, NFKB1 |             | NFKB1                                                                                |
| Calcification of cells                       | EGA4-1 |            | SPP1        | BMP2                                                                                 |
| Proliferation of neuronal cells              | M-1    |            | DUSP10      | DLG4, DYRK1A, EGR1, GNAO1, NCAM1, NOS1, PAK1, PSEN1, RBPJ, RELN                      |
|                                              |        |            |             | BMP4, CAV1, DUSP10, EGR1, EGR3, ESR2, IGF1R, JAG1, RELN, SYNPO                       |
|                                              |        |            |             | CTNNB1, DLG4, DYRK1A, EGR1, GNAO1, NCAM1, NOS1, PAK1, PSEN1, PSEN2, RBPJ, RELN, RYR2 |
| Development of neurons                       | M-1    |            | HEY2        | BMP4, CAV1, CTNNB1, DDAH1, EGR1, EGR3, RELN                                          |

|                                                   |        |                    |              |                                                             |                                                       |
|---------------------------------------------------|--------|--------------------|--------------|-------------------------------------------------------------|-------------------------------------------------------|
| Development of body axis                          | M-1    |                    | HEY2, RUNX2  | CTNNB1, DLG4, EGR1, GNAO1, NCAM1, PSEN1, RBPJ, RELN, STXBP1 | BMP4, CTNNB1, EGR1, IGF1R, JAG1, RELN, RUNX2, ST8SIA4 |
| Differentiation of mesenchymal cells              | M-1    |                    | RUNX2        | CTNNB1                                                      | BMP4, CAV1, CTNNB1, RUNX2                             |
| Differentiation of mesenchymal stem cells         | M-1    |                    | RUNX2        | CTNNB1                                                      | BMP4, CAV1, CTNNB1, RUNX2                             |
| Proliferation of leukemia cell lines              | M-1    |                    | PTPRK, RUNX2 | CTNNB1, EGR1                                                | BMP4, CTNNB1, EGR1, IGF1R, IGFBP3, NKX3-1, RUNX2      |
| Differentiation of hematopoietic progenitor cells | M-1    |                    | CD86, RUNX2  | CTNNB1, EGR1                                                | BMP4, CTNNB1, EGR1, EGR3, JAG1, RUNX2, TIMP1          |
| Differentiation of hematopoietic cells            | M-1    |                    | CD86, RUNX2  | CTNNB1, EGR1                                                | BMP4, CTNNB1, EGR1, EGR3, JAG1, RUNX2, TIMP1          |
| Arrest in proliferation of cells                  | M-1    |                    | RUNX2        | CTNNB1, EGR1                                                | BMP4, CAV1, CTNNB1, EGR1, IGF1R, RUNX2                |
| Volume of bone                                    | M-1    |                    | HEY2         | NOS1                                                        | CAV1                                                  |
| Mineralization of bone marrow stromal cells       | M-1    |                    | RUNX2        | PSEN1                                                       | JAG1, RUNX2                                           |
| Metabolism of carbohydrate                        | EGA4-1 | APP, NFKB1         | DUSP6, SPP1  |                                                             | APOA1, BMP2, DUSP6, NFKB1                             |
| Synthesis of carbohydrate                         | EGA4-1 | NFKB1              | DUSP6, SPP1  |                                                             | APOA1, BMP2, DUSP6, NFKB1                             |
| Activation of blood cells                         | EGA4-1 | APP, NFKB1         | SPP1         |                                                             | APOA1, GRN, NFKB1                                     |
| Activation of myeloid cells                       | EGA4-1 | APP                | SPP1         |                                                             | GRN                                                   |
| Stimulation of cells                              | EGA4-1 | APP                | SPP1         |                                                             | APOA1, BMP2                                           |
| Synthesis of D-glucose                            | EGA4-1 | NFKB1              | DUSP6        |                                                             | DUSP6, NFKB1                                          |
| Release of metal                                  | EGA4-1 | APP                | SPP1         |                                                             | BMP2                                                  |
| Quantity of bone cells                            | EGA4-1 | NFKB1              | SPP1         |                                                             | NFKB1                                                 |
| Cell movement of leukocytes                       | EGA4-1 | APP, NFKB1         | SPP1         |                                                             | APOA1, GRN, NFKB1, TIMP3                              |
| Cell movement of blood cells                      | EGA4-1 | APP, NFKB1         | SPP1         |                                                             | APOA1, BMP2, GRN, NFKB1, TIMP3                        |
| Quantity of lymphocytes                           | EGA4-1 | APP, IL2RG, NFKB1  | SPP1         |                                                             | APOA1, NFKB1                                          |
| Quantity of connective tissue cells               | EGA4-1 | NFKB1              | SPP1         |                                                             | NFKB1                                                 |
| Phosphorylation of protein                        | EGA4-1 | APP                | SPP1         |                                                             | APOA1                                                 |
| Cellular infiltration by leukocytes               | EGA4-1 | APP, NFKB1         | SPP1         |                                                             | APOA1, NFKB1, TIMP3                                   |
| Quantity of lymphatic system cells                | EGA4-1 | APP, IL2RG, NFKB1  | SPP1         |                                                             | APOA1, NFKB1                                          |
| Chemotaxis of myeloid cells                       | EGA4-1 | APP                | SPP1         |                                                             | APOA1, GRN                                            |
| Cell movement of myeloid cells                    | EGA4-1 | APP                | SPP1         |                                                             | APOA1, GRN, TIMP3                                     |
| Cell viability of connective tissue cells         | EGA4-1 | APP, NFKB1, PDCCD4 | SPP1         |                                                             | BMP2, NFKB1                                           |
| Quantity of mononuclear leukocytes                | EGA4-1 | APP, IL2RG, NFKB1  | SPP1         |                                                             | APOA1, NFKB1                                          |
| Cellular infiltration by blood cells              | EGA4-1 | APP, NFKB1         | SPP1         |                                                             | APOA1, NFKB1, TIMP3                                   |
| Cellular infiltration                             | EGA4-1 | APP, NFKB1         | SPP1         |                                                             | APOA1, NFKB1, TIMP3                                   |
| Binding of endothelial cells                      | EGA4-1 | APP                | SPP1         |                                                             | TIMP3                                                 |
| Cell movement of epithelial cell lines            | EGA4-1 | APP, NFKB1         | SPP1         |                                                             | APOA1, NFKB1                                          |

|                                      |        |            |      |              |
|--------------------------------------|--------|------------|------|--------------|
| Quantity of antigen presenting cells | EGA4-1 | APP, NFKB1 | SPP1 | NFKB1        |
| Morphology of muscle                 | EGA4-1 | APP, NFKB1 | SPP1 | GRN, NFKB1   |
| Morphology of bone                   | EGA4-1 | APP        | SPP1 | BMP2, COL1A2 |
| Survival of osteoclasts              | EGA4-1 | NFKB1      | SPP1 | BMP2, NFKB1  |
| Size of bone                         | EGA4-1 | APP        | SPP1 | BMP2, COL1A2 |
| Healing of epithelial tissue         | EGA4-1 | NFKB1      | SPP1 | GRN, NFKB1   |
| Morphology of muscle cells           | EGA4-1 | APP, NFKB1 | SPP1 | GRN, NFKB1   |
