# Supplementary material
Source: PubMed Central journal article supplement (PMC6417155)
Supplement: gaz001_schall_et_al._table_s35.pdf [file gaz001_schall_et_al._table_s35.pdf]

|                                                                         |        |                |         |
|-------------------------------------------------------------------------|--------|----------------|---------|
| Volume of bone                                                          | M-1    | BMPR1A<br>CAV1 |         |
| Morphology of right ventricle                                           | M-1    | CAV1           |         |
| Migration of neocortical neurons                                        | M-1    | BMP4<br>BMPR1A |         |
| Mineralization of bone marrow stromal cells                             | M-1    | RUNX2          |         |
| Morphology of chromosomes                                               | M-1    |                | DNMT1   |
| Conversion of choline-phospholipid                                      | M-1    |                | ENPP2   |
| Formation of occipital bone                                             | M-1    | RUNX2          |         |
| Fusion of insulin granule                                               | M-1    |                | MYRIP   |
| Gap junctional intercellular communication of neuronal progenitor cells | M-1    | CAV1           |         |
| Volume of trabecular bone                                               | M-1    | BMPR1A         |         |
| Long term depression of collateral synapses                             | M-1    | CAV1           |         |
| Arrest in cell cycle progression of sarcoma cell lines                  | M-1    |                | CLSPN   |
| Abnormal morphology of chromosomes                                      | M-1    |                | DNMT1   |
| Maturation of oocytes                                                   | M-3    |                | CPEB1   |
| Arrest in oogenesis                                                     | M-3    |                | CPEB1   |
| Delay in G1/S phase transition of prostate cancer cell lines            | M-3    |                | NCOA3   |
| Arrest in cleavage of embryo                                            | M-3    |                | CPEB1   |
| Relaxation of mesenteric artery                                         | M-3    |                | RGS2    |
| Thickness of vascular smooth muscle cells                               | M-3    |                | RGS2    |
| Relaxation of mesenteric resistance artery                              | M-3    |                | RGS2    |
| Density of sinusoid                                                     | M-3    |                | NCOA3   |
| Relaxation of artery                                                    | M-3    |                | RGS2    |
| Senescence of embryonic cell lines                                      | M-3    |                | CPEB1   |
| Proliferation of embryonic tissue                                       | M-3    |                | NCOA3   |
| Density of intrasyncytial bays                                          | M-3    |                | NCOA3   |
| Morphology of smooth muscle cells                                       | M-3    |                | RGS2    |
| Aneuploidy of embryonic cell lines                                      | EGA1-1 |                | PRMT1   |
| Aneuploidy of fibroblast cell lines                                     | EGA1-1 |                | PRMT1   |
| Self-renewal of lymphatic system cells                                  | EGA1-1 |                | PRMT1   |
| Methylation of L-arginine                                               | EGA1-1 |                | PRMT1   |
| Influx of nitrate                                                       | EGA1-1 |                | SLC17A5 |
| Fusion of styloid process of temporal bone                              | EGA1-1 |                | PCGF2   |
| Cytostasis of gonadal cell lines                                        | EGA1-1 |                | CSNK2A1 |
| Segmentation of occipital bone                                          | EGA1-1 |                | PCGF2   |
| Quantity of apoptotic oligodendrocytes                                  | EGA1-1 |                | SLC17A5 |
| Expansion of pro-T lymphocytes                                          | EGA1-1 |                | PCGF2   |

|                                                              |        |        |       |                                                  |
|--------------------------------------------------------------|--------|--------|-------|--------------------------------------------------|
| Proliferation of lymphocyte precursor cells                  | EGA1-1 |        |       | PCGF2                                            |
| Morphology of mesenchymal stem cells                         | EGA1-1 |        |       | CSNK2A1                                          |
| Segmentation of basilar bone                                 | EGA1-1 |        |       | PCGF2                                            |
| Quantity of oligodendrocytes                                 | EGA1-1 |        |       | PRMT1<br>SLC17A5                                 |
| Arrest in sub-G1 phase of squamous cell carcinoma cell lines | EGA1-1 |        |       | CSNK2A1                                          |
| Polyploidy of fibroblast cell lines                          | EGA1-1 |        |       | PRMT1                                            |
| Morphology of cortical projection neurons                    | EGA1-1 | TUBA1A |       |                                                  |
| Deamination of adenosine                                     | EGA1-1 |        |       | ADAT1                                            |
| Proliferation of embryonic stem cells                        | EGA2-1 |        |       | HMGB1                                            |
| Processing of rRNA                                           | EGA2-1 |        |       | LAS1L<br>NPM1<br>HMGB1<br>HNF4A                  |
| Permeability of intestine                                    | EGA2-1 |        |       | HNF4A                                            |
| Cell death of bone cancer cell lines                         | EGA2-2 |        |       | VDAC2                                            |
| Initiation of transcription                                  | EGA2-1 |        | EP300 |                                                  |
| G2/M phase of tumor cell lines                               | EGA2-1 |        |       | HLA-G<br>NFYA<br>NPM1<br>RAD17<br>RASSF1<br>SGK1 |
| Contraction of heart ventricle                               | EGA2-1 |        |       | ROCK1                                            |
| Decay of RNA                                                 | EGA2-1 |        |       | UPF3B                                            |
| Cell viability of gastrointestinal stromal tumor cell lines  | EGA2-1 |        | ENO1  |                                                  |
| Invasion of stomach cancer cell lines                        | EGA2-1 |        |       | RASSF1                                           |
| Apoptosis of synovial fibroblasts                            | EGA2-1 |        |       | BAX                                              |
| Cytostasis of connective tissue cells                        | EGA2-1 |        |       | METAP2                                           |
| Initiation of S phase of kidney cell lines                   | EGA2-1 |        | CDK6  |                                                  |
| Cell death of spleen-derived dendritic cells                 | EGA2-1 |        |       | BAX                                              |
| Mitosis of fibroblast cell lines                             | EGA2-1 |        |       | PTPN11<br>RASSF1<br>HNF4A<br>NR5A2               |
| Quantity of ursodeoxycholic acid                             | EGA2-1 |        |       | HNF4A<br>NR5A2                                   |
| Stabilization of mitochondria                                | EGA2-1 |        |       | BAX                                              |
| Formation of nucleosomes                                     | EGA2-1 |        |       | HMGB1<br>METAP2<br>NPM1                          |
| Arrest in growth of neuronal progenitor cells                | EGA2-1 |        | CDK6  |                                                  |
| Cell death of megakaryocytes                                 | EGA2-1 |        |       | BAX                                              |
| Mitotic exit of cervical cancer cell lines                   | EGA2-1 |        |       | KPNB1                                            |
| Apoptosis of bone marrow-derived neutrophils                 | EGA2-1 |        |       | BAX                                              |
| Aggregation of skin cell lines                               | EGA2-1 |        |       | ROCK1                                            |

|                                                  |        |       |      |                                                                                        |
|--------------------------------------------------|--------|-------|------|----------------------------------------------------------------------------------------|
| Implantation of embryo                           | EGA2-1 |       |      | NRSA2<br>SGK1                                                                          |
| Cell cycle progression of bone cancer cell lines | EGA2-1 |       |      | RAD17                                                                                  |
| G2/M phase of colorectal cancer cell lines       | EGA2-1 |       |      | NFYA<br>NPM1<br>RAD17                                                                  |
| Aggregation of carcinoma cell lines              | EGA2-1 |       |      | ROCK1                                                                                  |
| Arrest in G1 phase of breast cancer cell lines   | EGA2-1 |       |      | ARHGAP11<br>A RAD17<br>RASSF1                                                          |
| G2/M phase of breast cell lines                  | EGA2-1 | EP300 |      |                                                                                        |
| Binding of chromosomes                           | EGA2-1 |       |      | HMGB1<br>NFYA<br>NPM1<br>RAD17<br>ARHGAP11<br>A RAD17<br>RASSF1                        |
| G2 phase of colorectal cancer cell lines         | EGA2-1 |       |      |                                                                                        |
| G1 phase of breast cancer cell lines             | EGA2-1 |       |      |                                                                                        |
| Production of C18-ceramide                       | EGA2-1 |       | BAX  |                                                                                        |
| Arrest in G2/M phase of tumor cell lines         | EGA2-1 |       |      | HLA-G<br>NFYA<br>RASSF1<br>SGK1<br>HLA-G<br>NFYA<br>PTPN11<br>RASSF1<br>SGK1<br>UBQLN2 |
| Arrest in G2/M phase                             | EGA2-1 |       |      |                                                                                        |
| Formation of apoptosome                          | EGA2-1 | APAF1 |      |                                                                                        |
| Aggregation of epithelial cell lines             | EGA2-1 |       |      | ROCK1<br>TXNRD1                                                                        |
| Morphology of Peyer's patches                    | EGA2-1 |       | ID2  |                                                                                        |
| Decay of mRNA                                    | EGA2-1 |       |      | UPF3B                                                                                  |
| Killing of bone marrow-derived dendritic cells   | EGA2-1 |       | BAX  |                                                                                        |
| Morphology of muscle cell lines                  | EGA2-1 | H2AFZ |      |                                                                                        |
| Arrest in cell cycle progression of muscle cells | EGA2-1 | EP300 |      |                                                                                        |
| Opening of permeability transition pores         | EGA2-1 |       | BAX  |                                                                                        |
| Synthesis of retinyl ester                       | EGA2-1 |       |      | HNF4A                                                                                  |
| Transmission of lipopolysaccharide               | EGA2-1 |       |      | HMGB1                                                                                  |
| Production of natural killer precursor cells     | EGA2-1 |       | ID2  |                                                                                        |
| Mitosis of liver cells                           | EGA2-1 |       |      | SIRT1                                                                                  |
| Proliferation of glandular epithelial cells      | EGA2-1 | EIF3H |      |                                                                                        |
| Cell survival of fibroblast cell lines           | EGA2-1 |       |      | SIRT1                                                                                  |
| Annealing of hnRNA                               | EGA2-1 |       |      | HNRNPC                                                                                 |
| Differentiation of reticulocytes                 | EGA2-1 |       |      | TFRC                                                                                   |
| Maturation of rRNA                               | EGA2-1 |       |      | NPM1                                                                                   |
| Permeability of mitochondrial outer membrane     | EGA2-1 |       | BAX  |                                                                                        |
| Recruitment of vesicles                          | EGA2-1 |       | ACTB |                                                                                        |
| Import of green fluorescent protein              | EGA2-1 |       |      | KPNB1                                                                                  |

|                                                            |        |               |     |          |       |
|------------------------------------------------------------|--------|---------------|-----|----------|-------|
| Migratory capacity of melanoma cell lines                  | EGA2-1 |               | ID2 |          |       |
| Morphology of chromatin                                    | EGA2-1 | EP300<br>HAT1 |     |          |       |
| Replication of genomic DNA                                 | EGA2-1 |               |     | TFAM     |       |
| Vacuolation of melanocytes                                 | EGA2-2 |               |     | CTSV     |       |
| Initiation of cohesion of sister telomere                  | EGA2-2 |               |     | CBX3     |       |
| Scaling of inner root sheath                               | EGA2-2 |               |     | CTSV     |       |
| Thickening of cardiomyocytes                               | EGA2-2 |               |     | MARCKSL1 |       |
| Proliferation of melanocytes                               | EGA2-2 |               |     | CTSV     |       |
| Quantity of lung tissue                                    | EGA2-2 |               |     |          | HMOX1 |
| Degradation of chromosomes                                 | EGA2-2 |               |     | XRCC5    |       |
| Attachment of desmosomes                                   | EGA2-2 |               |     |          | DSP   |
| Re-entry into M phase of lung cell lines                   | EGA2-2 |               |     | XRCC5    |       |
| Recovery of heart ventricle                                | EGA2-2 |               |     |          | HMOX1 |
| Damage of cellular membrane                                | EGA2-2 |               |     |          | HMOX1 |
| Oxidative stress response of macrophage cancer cell lines  | EGA2-2 |               |     |          | HMOX1 |
| Quantity of LH                                             | EGA2-2 |               |     |          | HMOX1 |
| Migration of podocytes                                     | EGA2-2 |               |     | CTSV     |       |
| Radiosensitivity of lung cell lines                        | EGA2-2 |               |     | XRCC5    |       |
| Colony formation of Helicobacter pylori 10700              | EGA2-2 |               |     |          | HMOX1 |
| Maturation of satellite cells                              | EGA2-2 |               |     |          | HMOX1 |
| Polyploidization of colorectal cancer cell lines           | EGA2-2 |               |     | XRCC5    |       |
| Contraction of arteriole                                   | EGA2-2 |               |     |          | HMOX1 |
| Maturation of osteoclasts                                  | EGA2-2 |               |     |          | HMOX1 |
| Healing of gastric mucosa                                  | EGA2-2 |               |     |          | HMOX1 |
| Thickness of gingiva                                       | EGA2-2 |               |     | CTSV     |       |
| Metabolism by embryonic cell lines                         | EGA2-2 |               |     | EPCAM    |       |
| Metabolism by fibroblast cell lines                        | EGA2-2 |               |     | EPCAM    |       |
| Disassembly of actin filaments                             | EGA2-2 |               |     | CAP1     |       |
| Cell viability of leukocyte cell lines                     | EGA2-2 |               |     |          | HMOX1 |
| Stabilization of chromosomes                               | EGA2-2 |               |     | XRCC5    |       |
| Breakdown of heme                                          | EGA2-2 |               |     |          | HMOX1 |
| Attachment of intermediate filaments                       | EGA2-2 |               |     |          | DSP   |
| Oxidative stress response of melanoma cell lines           | EGA2-2 |               |     |          | HMOX1 |
| Metabolism by squamous cell carcinoma cell lines           | EGA2-2 |               |     | EPCAM    |       |
| Fusion of chromosomes                                      | EGA2-2 |               |     | XRCC5    |       |
| Cell viability of stem cells                               | EGA2-2 |               |     | XRCC5    |       |
| Formation of epidermis                                     | EGA2-2 |               |     | CTSV     |       |
| Dissociation of chromosomes                                | EGA2-2 |               |     | XRCC5    |       |
| Killing of Staphylococcus aureus subsp. aureus str. Newman | EGA2-2 |               |     | CTSV     |       |
| Stimulation of CD8+ T lymphocyte                           | EGA2-2 |               |     |          | HMOX1 |

|                                                            |        |  |          |       |
|------------------------------------------------------------|--------|--|----------|-------|
| Oxidative stress response of tumor cell lines              | EGA2-2 |  |          | HMOX1 |
| S phase of carcinoma cell lines                            | EGA2-2 |  |          | HMOX1 |
| Stabilization of desmosomes                                | EGA2-2 |  |          | DSP   |
| Generation of bilirubin                                    | EGA2-2 |  |          | HMOX1 |
| Deposition of vascular smooth muscle cells                 | EGA2-2 |  |          | HMOX1 |
| Accumulation of vascular smooth muscle cells               | EGA2-2 |  |          | HMOX1 |
| Morphology of intercalated disks                           | EGA2-2 |  | MARCKSL1 |       |
| Sealing of cellular membrane                               | EGA2-2 |  |          | DSP   |
| Double-stranded DNA break repair of cells                  | EGA2-2 |  | XRCC5    |       |
| S phase of lung cancer cell lines                          | EGA2-2 |  |          | HMOX1 |
| Apoptosis of gastric mucous cells                          | EGA2-2 |  |          | HMOX1 |
| Survival of smooth muscle cell lines                       | EGA2-2 |  |          | HMOX1 |
| Metabolism by kidney cell lines                            | EGA2-2 |  | EPCAM    |       |
| Formation of hair follicle                                 | EGA2-2 |  | CTSV     |       |
| Alignment of actin filaments                               | EGA2-2 |  | MARCKSL1 |       |
| Concentration of reactive oxygen species                   | EGA2-2 |  |          | HMOX1 |
| Metabolism by epithelial cell lines                        | EGA2-2 |  | EPCAM    |       |
| Cleavage of heme                                           | EGA2-2 |  |          | HMOX1 |
| Maturation of bone marrow-derived immature dendritic cells | EGA2-2 |  |          | HMOX1 |
| Maturation of myoblasts                                    | EGA2-2 |  |          | HMOX1 |
| Radiosensitivity of tumor cell lines                       | EGA2-2 |  | XRCC5    |       |
| Quantity of prostatic duct                                 | EGA2-2 |  | WDR77    |       |
| Viability                                                  | EGA2-2 |  | XRCC5    |       |
| Translocation of chromosomes                               | EGA2-2 |  | XRCC5    |       |
| Thickness of fibrous cap                                   | EGA2-2 |  |          | HMOX1 |
| Proliferation of basal keratinocytes                       | EGA2-2 |  | CTSV     |       |
| Homeostasis of bilirubin                                   | EGA2-2 |  |          | HMOX1 |
| Conversion of heme                                         | EGA2-2 |  |          | HMOX1 |
| Oxidation of heme                                          | EGA2-2 |  |          | HMOX1 |
| Secretion of taurocholic acid                              | EGA2-2 |  |          | HMOX1 |
| Differentiation of prostatic tissue                        | EGA2-2 |  | WDR77    |       |
| Survival of heart                                          | EGA2-2 |  |          | HMOX1 |
| Quantity of keratin intermediate filaments                 | EGA2-2 |  |          | DSP   |
| Formation of desmosomes                                    | EGA2-2 |  |          | DSP   |
| Morphology of myofibrils                                   | EGA2-2 |  | MARCKSL1 |       |
| Cell-cell adhesion of keratinocyte cancer cell lines       | EGA2-2 |  |          | DSP   |
| Development of sensory organ                               | EGA2-4 |  |          | DSC1  |
| Formation of utricle                                       | EGA2-4 |  |          | DSC1  |
| Fragility of epidermis                                     | EGA2-4 |  |          | DSC1  |
| Permeability of epidermis                                  | EGA2-4 |  |          | DSC1  |
| Lifespan of organism                                       | EGA3-1 |  | CEBPB    |       |

|                                                |        |        |  |                 |
|------------------------------------------------|--------|--------|--|-----------------|
| Secretion of prostaglandin E2                  | EGA3-1 |        |  | ACSL4           |
| Quantity of lactic acid                        | EGA3-1 |        |  | LEP             |
| Apoptosis of peritoneal macrophages            | EGA3-1 |        |  | CEBPB<br>LGALS3 |
| Quantity of reactive oxygen species            | EGA3-2 |        |  | MTTP            |
| Cell death of motor neurons                    | EGA3-1 |        |  | TNFRSF1A        |
| Growth of yeast                                | EGA3-2 |        |  | IFNAR1          |
| Oxidation of long chain fatty acid             | EGA3-2 |        |  | MTTP            |
| Outgrowth of neuroblasts                       | EGA3-2 |        |  | ITGA6           |
| Oxidation of oleic acid                        | EGA3-2 |        |  | MTTP            |
| Assembly of lipoprotein                        | EGA3-2 |        |  | MTTP            |
| Proliferation of erythroblasts                 | EGA3-2 |        |  | IFNAR1          |
| Interaction of Schwann cells                   | EGA3-2 |        |  | ITGA6           |
| Binding of skin cell lines                     | EGA3-2 |        |  | ITGA6           |
| Development of proamniotic cavity              | EGA3-2 |        |  | HSP90B1         |
| Colony formation of cervical cancer cell lines | EGA3-2 |        |  | SMARCE1         |
| Delay in organismal death                      | EGA3-2 |        |  | IFNAR1          |
| Invasion of ovarian cancer cell lines          | EGA3-2 |        |  | CLDN3           |
| Beta-oxidation of long chain fatty acid        | EGA3-2 |        |  | MTTP            |
| Stabilization of filopodia                     | EGA3-2 |        |  | ITGA6           |
| Ossification of cardiac muscle                 | EGA3-3 | UTRN   |  |                 |
| Morphology of neuromuscular junctions          | EGA3-3 | UTRN   |  |                 |
| Quantity of postsynaptic membrane              | EGA3-3 | UTRN   |  |                 |
| Ossification of skeletal muscle                | EGA3-3 | UTRN   |  |                 |
| Morphology of myotendinous junctions           | EGA3-3 | UTRN   |  |                 |
| Infiltration by connective tissue cells        | EGA3-3 | UTRN   |  |                 |
| Folding of postsynaptic membrane               | EGA3-3 | UTRN   |  |                 |
| Accumulation of intramyocellular lipid store   | EGA3-3 | UTRN   |  |                 |
| Lipolysis of lipid                             | EGA3-4 |        |  | PPARA           |
| Quantity of lactic acid                        | EGA3-4 |        |  | PPARA           |
| Development of tumor cell lines                | EGA3-4 |        |  | ATF3<br>PPARA   |
| Differentiation of adipocytes                  | EGA3-4 |        |  | ATF3<br>PPARA   |
| Synthesis of cholesterol ester                 | EGA3-4 |        |  | PPARA           |
| Quantity of peroxisomes                        | EGA3-4 |        |  | PPARA           |
| Oxidation of palmitoyl-coenzyme A              | EGA3-4 |        |  | PPARA           |
| Oxidation of oleic acid                        | EGA3-4 |        |  | PPARA           |
| Delay in organismal death                      | EGA3-4 |        |  | ATF3            |
| Invasion of ovarian cancer cell lines          | EGA3-4 |        |  | ATF3            |
| Utilization of D-glucose                       | EGA3-4 |        |  | PPARA           |
| Synthesis of ketone body                       | EGA3-4 |        |  | PPARA           |
| Development of breast cell lines               | EGA3-4 |        |  | PPARA           |
| Hydrolysis of protein                          | EGA3-4 | HOMER2 |  |                 |
| Steroidogenesis of hormone                     | EGA3-4 |        |  | ATF3<br>PPARA   |

|                                               |        |        |       |
|-----------------------------------------------|--------|--------|-------|
| Spermatogenesis                               | EGA3-4 |        | PPARA |
| Synthesis of glycerol                         | EGA3-4 |        | PPARA |
| Quantity of mitochondrial cristae             | EGA3-4 |        | PPARA |
| Colony formation of ovarian cancer cell lines | EGA3-4 |        | ATF3  |
| Secretion of cholesterol                      | EGA3-4 |        | PPARA |
| Migration of bladder cancer cell lines        | EGA3-4 |        | ATF3  |
| Removal of cholesterol                        | EGA3-4 |        | PPARA |
| Size of peroxisomes                           | EGA3-4 |        | PPARA |
| Fragmentation of cells                        | EGA3-4 |        | PPARA |
| Formation of testis                           | EGA3-4 |        | PPARA |
| Accumulation of stearic acid                  | EGA3-4 |        | PPARA |
| Colony formation of fibroblasts               | EGA3-4 |        | ATF3  |
| Quantity of carnitine                         | EGA3-4 |        | PPARA |
| Secretion of leukotriene B4                   | EGA3-4 |        | PPARA |
| Cell viability of eye cell lines              | EGA3-4 |        | PPARA |
| Density of mitochondrial cristae              | EGA3-4 |        | PPARA |
| Regeneration of peripheral nerve              | EGA3-4 |        | ATF3  |
| Concentration of testosterone                 | EGA3-4 |        | PPARA |
| Apoptosis of lymphocytes                      | EGA3-4 |        | PPARA |
| Elongation of neurites                        | EGA3-4 |        | ATF3  |
| Mass of liver                                 | EGA3-4 |        | PPARA |
| Accumulation of oleic acid                    | EGA3-4 |        | PPARA |
| Cell movement of vascular smooth muscle cells | EGA3-4 |        | ATF3  |
| Function of heart ventricle                   | EGA3-4 |        | PPARA |
| Colony survival of lung cancer cell lines     | EGA3-4 |        | ATF3  |
| Quantity of lipid peroxide                    | EGA3-4 |        | PPARA |
| Formation of skin                             | EGA3-4 |        | PPARA |
| Proliferation of vascular smooth muscle cells | EGA3-4 |        | PPARA |
| Regulation of L-glutamic acid                 | EGA3-4 | HOMER2 |       |
| Absorption of cholesterol                     | EGA3-4 |        | PPARA |
| Catabolism of lipoprotein                     | EGA3-4 |        | PPARA |
| Generation of superoxide                      | EGA3-4 |        | PPARA |
| Accumulation of palmitic acid                 | EGA3-4 |        | PPARA |
| Binding of DNA endogenous promoter            | EGA3-4 |        | PPARA |
| Metabolism of terpenoid                       | EGA3-4 |        | ATF3  |
| Regulation of cholesterol                     | EGA3-4 |        | PPARA |
| Quantity of segmented filamentous bacterium   | EGA3-4 |        | PPARA |
| Mitogenesis of hepatocytes                    | EGA3-4 |        | PPARA |
| Binding of NF-kappa B response element        | EGA3-4 |        | PPARA |
| Recovery of heart                             | EGA3-4 |        | PPARA |
| Synthesis of urea                             | EGA3-4 |        | PPARA |
| Ingestion of ethanol                          | EGA3-4 | HOMER2 |       |
| Apoptosis of fibroblasts                      | EGA3-4 |        | ATF3  |
| Development of B lymphocytes                  | EGA3-4 |        | PPARA |
| Formation of ketone body                      | EGA3-4 |        | PPARA |
| Modification of chromatin                     | EGA3-4 |        | ATF3  |
| Concentration of cholesterol                  | EGA3-4 |        | PPARA |
| Place preference                              | EGA3-4 | HOMER2 |       |
| Quantity of stratum corneum                   | EGA3-4 |        | PPARA |



|                                                    |        |        |               |
|----------------------------------------------------|--------|--------|---------------|
| G1/S phase transition of fibroblasts               | EGA3-4 |        | ATF3          |
| Function of peroxisomes                            | EGA3-4 |        | PPARA         |
| Transport of fatty acid                            | EGA3-4 |        | PPARA         |
| Size of atrium                                     | EGA3-4 |        | ATF3          |
| Breakdown of mitochondrial outer membrane          | EGA3-4 |        | PPARA         |
| Apoptosis of leukocytes                            | EGA3-4 |        | ATF3<br>PPARA |
| Oxidation of fat                                   | EGA3-4 |        | PPARA         |
| Function of mitochondria                           | EGA3-4 |        | ATF3          |
| Proliferation of peroxisomes                       | EGA3-4 |        | PPARA         |
| Excretion of sterol                                | EGA3-4 |        | PPARA         |
| Quantity of endothelial progenitor cells           | EGA3-4 |        | PPARA         |
| Development of breast cancer cell lines            | EGA3-4 |        | PPARA         |
| Secretion of triacylglycerol                       | EGA3-4 |        | ATF3<br>PPARA |
| Morphology of embryonic cell lines                 | EGA3-4 |        | ATF3          |
| Homeostasis of lipid                               | EGA3-4 |        | PPARA         |
| Adipogenesis of liver                              | EGA3-4 |        | PPARA         |
| Regulation of triacylglycerol                      | EGA3-4 |        | PPARA         |
| Tubulogenesis of endothelial cell lines            | EGA3-4 |        | ATF3          |
| Oxidation of 9-methylpentadecanoic acid            | EGA3-4 |        | PPARA         |
| Regulation of D-glucose                            | EGA3-4 |        | PPARA         |
| Apoptosis of bone marrow-derived mast cells        | EGA3-4 |        | ATF3          |
| Cycling of D-glucose                               | EGA3-4 |        | PPARA         |
| Accumulation of linoleic acid                      | EGA3-4 |        | PPARA         |
| Degradation of leukotriene B4                      | EGA3-4 |        | PPARA         |
| Response of hepatocytes                            | EGA3-4 |        | PPARA         |
| Mass of adipose tissue                             | EGA3-4 |        | ATF3<br>PPARA |
| Generation of immunosuppressive regulatory B cells | EGA3-4 |        | PPARA         |
| Cocaine seeking behavior                           | EGA3-4 | HOMER2 |               |
| Nocifensive behavior                               | EGA3-4 |        | PPARA         |
| Tubulogenesis                                      | EGA3-4 |        | ATF3<br>PPARA |
| Infiltration by lipid                              | EGA3-4 |        | PPARA         |
| Metabolism of amino acids                          | EGA3-4 |        | PPARA         |
| Metabolism by adipose tissue                       | EGA3-4 |        | PPARA         |
| Adipogenesis                                       | EGA3-4 |        | PPARA         |
| Uptake of bile salt                                | EGA3-4 |        | PPARA         |
| Conduction of heart                                | EGA3-4 |        | ATF3          |
| Excision repair                                    | EGA3-4 |        | ATF3          |
| Storage of lipid                                   | EGA3-4 |        | PPARA         |
| Production of taurocholic acid                     | EGA3-4 |        | PPARA         |
| Apoptosis of superior cervical ganglion neurons    | EGA3-4 |        | ATF3          |
| Synthesis of 2-arachidonoylglycerol                | EGA3-4 | HOMER2 |               |
| Synthesis of testosterone                          | EGA3-4 |        | PPARA         |
| G1/S phase transition                              | EGA3-4 |        | ATF3<br>PPARA |
| Synthesis of lipoprotein                           | EGA3-4 |        | PPARA         |

|                                                |        |                |                 |
|------------------------------------------------|--------|----------------|-----------------|
| Development of endocrine region of pancreas    | EGA3-4 |                | ATF3            |
| Transport of mitochondria                      | EGA3-4 |                | ATF3            |
| G1/S phase transition of smooth muscle cells   | EGA3-4 |                | PPARA           |
| Cell viability of ovarian cancer cell lines    | EGA3-4 |                | PPARA           |
| Disappearance of D-glucose                     | EGA3-4 |                | PPARA           |
| Synthesis of carnitine                         | EGA3-4 |                | PPARA           |
| Development of digestive system                | EGA3-4 |                | ATF3            |
| Esterification of cholesterol                  | EGA3-4 |                | PPARA           |
| Uptake of 9-methylpentadecanoic acid           | EGA3-4 |                | PPARA           |
| Delay in formation of stratum corneum          | EGA3-4 |                | PPARA           |
| Mass of fat pad                                | EGA3-4 |                | PPARA           |
| Binding of AP1 response element                | EGA3-4 |                | PPARA           |
| Tubulogenesis of endothelial cells             | EGA3-4 |                | PPARA           |
| Distribution of mitochondria                   | EGA3-1 | PINK1          |                 |
| Cleavage of protein binding site               | EGA3-1 | CEBPB          |                 |
| Binding of AP1/CRE element                     | EGA3-1 |                | LEP             |
| Diffusion of K+                                | EGA3-1 |                | LEP             |
| DNA damage response of breast cell lines       | EGA3-1 | NTHL1          |                 |
| Quantity of megakaryocytes                     | EGA3-1 | FLNA           |                 |
| Binding of breast cell lines                   | EGA3-1 | ELF3<br>LGALS3 |                 |
| Development of germinal center                 | EGA3-1 |                | TNFRSF1A        |
| Growth of focal adhesions                      | EGA3-1 | FLNA           |                 |
| Initiation of cell movement of neurons         | EGA3-1 | FLNA           |                 |
| Development of pancreatic cancer cell lines    | EGA3-1 | CEBPB          |                 |
| Quantity of S-adenosylmethionine               | EGA3-1 |                | TNFRSF1A        |
| Cell spreading of fibrosarcoma cell lines      | EGA3-1 | FLNA           |                 |
| Concentration of glycerol                      | EGA3-1 |                | LEP<br>TNFRSF1A |
| Regulation of connective tissue cells          | EGA3-1 |                | LEP             |
| Accumulation of tetracosahexaenoic acid        | EGA3-1 | ACOX1          |                 |
| Initiation of migration of leukemia cell lines | EGA3-1 | FLNA           |                 |
| Quantity of peroxisomes                        | EGA3-1 | ACOX1          |                 |
| Delay in S phase of fibroblasts                | EGA3-1 |                | GRB10           |
| Apoptosis of stria vascularis cells            | EGA3-1 | TFB1M          |                 |
| Autophagy of mitochondria                      | EGA3-1 | PINK1          |                 |
| Closure of embryonic tissue                    | EGA3-1 |                | CFL1            |
| Hypermaturation of dendritic cells             | EGA3-1 | ELF3           |                 |
| Cell spreading of RPE cells                    | EGA3-1 | LGALS3         |                 |
| Glomerular filtration rate of kidney           | EGA3-1 |                | TNFRSF1A        |
| Apoptosis of endometrial cells                 | EGA3-1 | CEBPB          |                 |

|                                                      |        |        |                                  |
|------------------------------------------------------|--------|--------|----------------------------------|
| Double-stranded DNA break repair of tumor cell lines | EGA3-1 | TP53I3 |                                  |
| Accumulation of primary spermatocytes                | EGA3-1 |        | SHBG                             |
| Dispersal of nuclear bodies                          | EGA3-1 |        | XPO1                             |
| Binding of p53 response element                      | EGA3-1 |        | CEBPB                            |
| Cell cycle progression of neurons                    | EGA3-1 |        | FLNA<br>YWHAB                    |
| Cell division of hepatocytes                         | EGA3-1 |        | TNFRSF1A                         |
| Onset of cell death                                  | EGA3-1 |        | LEP                              |
| Cytotoxicity of fibroblasts                          | EGA3-1 |        | TNFRSF1A                         |
| Downregulation of steroid                            | EGA3-1 |        | LEP                              |
| Stimulation of prostaglandin E2                      | EGA3-1 |        | LEP                              |
| Release of steroid hormone                           | EGA3-1 |        | LEP                              |
| G2 phase of fibroblasts                              | EGA3-1 |        | GRB10                            |
| Synthesis of sphinganine                             | EGA3-1 |        | ORMDL1                           |
| Activation of hypothalamic neurons                   | EGA3-1 |        | LEP                              |
| Attachment of RPE cells                              | EGA3-1 |        | LGALS3                           |
| Activation of smooth muscle cells                    | EGA3-1 |        | LEP                              |
| Delamination of neural crest cells                   | EGA3-1 |        | CFL1                             |
| Contraction of ventricular myocytes                  | EGA3-1 |        | LEP                              |
| Segregation of cells                                 | EGA3-1 |        | TNFRSF1A                         |
| Cell viability of bone marrow stromal cells          | EGA3-1 |        | LEP                              |
| Clearance of Trypanosoma cruzi Tulahuen strain       | EGA3-1 |        | LGALS3                           |
| Cell cycle progression of cortical neurons           | EGA3-1 |        | YWHAB                            |
| Interconnectivity of mitochondria                    | EGA3-1 |        | PINK1                            |
| Closure of neural tube                               | EGA3-1 |        | CFL1                             |
| Transcytosis                                         | EGA3-1 |        | FLNA                             |
| Synthesis of phosphatidylethanolamine                | EGA3-1 |        | ACBD6                            |
| Bone mineral density of trabecula                    | EGA3-1 |        | LEP                              |
| Ruffling of cell periphery                           | EGA3-1 |        | FLNA                             |
| Activation of vagus nerve                            | EGA3-1 |        | LEP                              |
| Daytime core body temperature                        | EGA3-1 |        | LEP                              |
| Growth of organism                                   | EGA3-2 |        | IFNAR1<br>ITGA6<br>MTTP<br>DUSP6 |
| Synthesis of D-glucose                               | EGA4-1 |        | SLC37A4<br>TCF7L2                |
| Accumulation of ganglioside                          | EGA4-1 |        | HEXA PSAP                        |
| Recruitment of phospholipid                          | EGA4-1 |        | APOA1<br>VTN                     |
| Accumulation of glycogen                             | EGA4-1 |        | APOA1<br>SLC37A4                 |
| Cell spreading of endothelial cell lines             | EGA4-1 |        | VTN                              |
| Binding of embryonic cell lines                      | EGA4-1 |        | TIMP3<br>VTN                     |
| Shape change of endothelial cell lines               | EGA4-1 |        | VTN                              |
| Size of islets of Langerhans                         | EGA4-1 |        | TCF7L2                           |

|                                                           |        |       |      |
|-----------------------------------------------------------|--------|-------|------|
| Cell movement of endothelial cells                        | EGA4-2 | CDH2  |      |
| Migration of prostate cancer cell lines                   | EGA4-2 | CDH11 |      |
| Cell movement of fibrosarcoma cell lines                  | EGA4-2 | CDH2  |      |
| Polarization of cells                                     | EGA4-2 | CDH2  |      |
| Cell movement of sarcoma cell lines                       | EGA4-2 | CDH2  |      |
| Extension of cellular protrusions                         | EGA4-2 | CDH2  |      |
| Aggregation of fibroblasts                                | EGA4-2 | CDH11 |      |
| Cell death of endothelial cell lines                      | EGA4-2 | CDH2  |      |
| Aggregation of myoblasts                                  | EGA4-2 | CDH2  |      |
| Assembly of fibroblast cell lines                         | EGA4-2 | CDH2  |      |
| Size of heart                                             | EGA4-2 | CDH2  |      |
| Structure of synapse                                      | EGA4-2 | CDH2  |      |
| Assembly of ovarian cancer cell lines                     | EGA4-2 | CDH2  |      |
| Morphogenesis of head                                     | EGA4-2 | CDH2  |      |
| Binding of mural cells                                    | EGA4-2 | CDH2  |      |
| Architecture of pneumocytes                               | EGA4-2 | CDH11 |      |
| Quantity of muscle cells                                  | EGA4-2 | CDH11 |      |
| Morphology of yolk sac                                    | EGA4-2 | CDH2  |      |
| Size of pericardial cavity                                | EGA4-2 | CDH2  |      |
| Aggregation of ventricular myocytes                       | EGA4-2 | CDH2  |      |
| Quantity of myofibroblasts                                | EGA4-2 | CDH11 |      |
| Quantity of fibroblasts                                   | EGA4-2 | CDH11 |      |
| Morphogenesis of medial ganglionic eminences              | EGA4-2 | CDH2  |      |
| Cell-cell adhesion of fibroblast cell lines               | EGA4-2 | CDH11 |      |
| Aggregation of cortical neurons                           | EGA4-2 | CDH2  |      |
| Formation of basal layer of epidermis                     | EGA4-2 | CDH11 |      |
| Quantity of bone cells                                    | EGA4-3 |       | CD47 |
| Quantity of connective tissue cells                       | EGA4-3 |       | CD47 |
| Binding of endothelial cells                              | EGA4-3 |       | CD47 |
| Quantity of osteoblasts                                   | EGA4-3 |       | CD47 |
| Cell movement of sarcoma cell lines                       | EGA4-3 |       | CTSB |
| Recruitment of cells                                      | EGA4-3 |       | CD47 |
| Differentiation of bone cells                             | EGA4-3 |       | CD47 |
| Proliferation of liver cells                              | EGA4-3 |       | CTSB |
| Proliferation of hepatic stellate cells                   | EGA4-3 |       | CTSB |
| Survival of soft tissue                                   | EGA4-3 |       | CD47 |
| Transendothelial migration of leukocytes                  | EGA4-3 |       | CD47 |
| Translocation of galactosylceramide                       | EGA4-3 |       | PLP1 |
| Expression of mRNA                                        | EGA4-3 |       | CD47 |
| Development of microvasculature                           | EGA4-3 |       | CTSB |
| Destruction of cancer cells                               | EGA4-3 |       | CD47 |
| Response of helper T lymphocytes                          | EGA4-3 |       | PLP1 |
| Delay in initiation of differentiation of lung cell lines | EGA4-3 |       | CTSB |

|                                                                   |           |        |  |       |
|-------------------------------------------------------------------|-----------|--------|--|-------|
| Cell viability of neuroglia                                       | EGA4-3    |        |  | PLP1  |
| Development of bone marrow cells                                  | EGA4-3    |        |  | CD47  |
| Sequestration of cholesterol                                      | EGA4-3    |        |  | PLP1  |
| Cell movement of endothelial cell lines                           | EGA4-3    |        |  | CTSB  |
| Cleavage of coumarin                                              | EGA4-3    |        |  | CTSB  |
| Accumulation of granules                                          | EGA4-3    |        |  | ITGB5 |
| Relaxation of vascular smooth muscle cells                        | EGA4-3    |        |  | CD47  |
| Migration of glioblastoma cells                                   | EGA4-3    |        |  | CTSB  |
| Binding of splenocytes                                            | EGA4-3    |        |  | CD47  |
| Translocation of lactosylceramide                                 | EGA4-3    |        |  | PLP1  |
| Stabilization of myelin sheath                                    | EGA4-3    |        |  | PLP1  |
| Structure of myelin sheath                                        | EGA4-3    |        |  | PLP1  |
| Polarization of lymphoma cell lines                               | EGA4-3    |        |  | CD47  |
| Dissemination of diffuse large B-cell lymphoma cells              | EGA4-3    |        |  | CD47  |
| Proliferation of hepatic stellate cells/myofibroblasts            | EGA4-3    |        |  | CTSB  |
| Accumulation of lysosome                                          | EGA4-3    |        |  | CTSB  |
| Cell movement of bone cancer cell lines                           | EGA4-3    |        |  | CTSB  |
| Clonal expansion of Th2 cells                                     | EGA4-3    |        |  | PLP1  |
| Myelination                                                       | EGA4-3    |        |  | PLP1  |
| Cell death of type 1 macrophages                                  | EGA4-3    |        |  | CTSB  |
| Cell death of exocrine cells                                      | EGA4-3    |        |  | CTSB  |
| Adhesion of leukemia cell lines                                   | EGA4-3    |        |  | CD47  |
| Elongation of B lymphocytes                                       | EGA4-3    |        |  | CD47  |
| Size of T-cell zone                                               | EGA4-3    |        |  | CD47  |
| Survival of oligodendrocytes                                      | EGA4-3    |        |  | PLP1  |
| Translocation of glucosylceramide                                 | EGA4-3    |        |  | PLP1  |
| Dissemination of tumor cell lines                                 | EGA4-3    |        |  | CD47  |
| Elimination of red blood cells                                    | EGA4-3    |        |  | CD47  |
| Development of gastrointestinal tract                             | BL-Down-1 | SLC4A4 |  |       |
| Mislocalization of melanosomes                                    | BL-Down-1 | MYO7A  |  |       |
| Weakness of dentin                                                | BL-Down-1 | SLC4A4 |  |       |
| Depolarization of hair cells                                      | BL-Down-1 | MYO7A  |  |       |
| Synthesis of UDP-N-acetyl-D-galactosamine                         | BL-Down-1 | UAP1   |  |       |
| Development of stereocilia                                        | BL-Down-1 | MYO7A  |  |       |
| Transepithelial electrical resistance of breast cancer cell lines | BL-Down-1 | ID1    |  |       |
| Degradation of photoreceptors                                     | BL-Down-1 | MYO7A  |  |       |
| Activation of vascular endothelial cells                          | BL-Down-1 | ID1    |  |       |
| Movement of melanosomes                                           | BL-Down-1 | MYO7A  |  |       |

|                                                               |           |        |        |      |
|---------------------------------------------------------------|-----------|--------|--------|------|
| Glycolysis of hepatoma cell lines                             | BL-Down-1 | ID1    |        |      |
| Self-renewal of colorectal cancer cell lines                  | BL-Down-1 | ID1    |        |      |
| Transmigration of vascular endothelial cells                  | BL-Down-1 | ID1    |        |      |
| Signaling of astrocytes                                       | BL-Down-1 | SLC4A4 |        |      |
| Length of telomeres                                           | BL-Down-1 | ID1    |        |      |
| Binding of GATA-4 binding site                                | BL-Down-1 | ID1    |        |      |
| Binding of Nkx2.5 binding site                                | BL-Down-1 | ID1    |        |      |
| Accumulation of carcinoma cell lines                          | BL-Down-1 | ID1    |        |      |
| Cytostasis of smooth muscle cells                             | BL-Down-1 | ID1    |        |      |
| Size of white adipocytes                                      | BL-Down-1 | ID1    |        |      |
| Premature senescence of breast cancer cell lines              | BL-Down-1 | ID1    |        |      |
| Neurogenesis of neuroepithelial cells                         | BL-Down-1 | ID1    |        |      |
| Response of astrocytes                                        | BL-Down-1 | SLC4A4 |        |      |
| Movement of organelle                                         | BL-Down-1 | MYO7A  |        |      |
| Accumulation of lung cancer cell lines                        | BL-Down-1 | ID1    |        |      |
| Re-entry into cell cycle progression of fibroblast cell lines | BL-Down-1 | ID1    |        |      |
| Differentiation of pro-T3 thymocytes                          | BL-Down-1 | ID1    |        |      |
|                                                               |           | BMP4   |        |      |
| Development of body axis                                      | M-1       | BMPR1A | CDCA7L |      |
|                                                               |           | EGR1   | STXBP1 |      |
|                                                               |           | RUNX2  |        |      |
| Dendritic growth/branching                                    | M-1       | CAV1   | CTNNA2 |      |
|                                                               |           | TIAM1  | TIAM1  |      |
| Shape change of neurites                                      | M-1       | CAV1   | CTNNA2 |      |
|                                                               |           | TIAM1  | TIAM1  |      |
| Cognition                                                     | M-1       | BMPR1A | MEIS2  |      |
|                                                               |           | EGR1   |        |      |
| Shape change of neurons                                       | M-1       | CAV1   | CTNNA2 |      |
|                                                               |           | TIAM1  | TIAM1  |      |
|                                                               |           | BMP4   |        |      |
|                                                               |           | BMPR1A |        |      |
| Cytostasis                                                    | M-1       | CAV1   | CCND3  |      |
|                                                               |           | EGR1   | CDCA8  |      |
|                                                               |           | IKZF3  |        |      |
| Formation of brain                                            | M-1       | EGR1   | CDCA7L |      |
|                                                               |           |        | STXBP1 |      |
|                                                               |           | BMP4   |        |      |
| Cytostasis of tumor cell lines                                | M-1       | BMPR1A | CCND3  |      |
|                                                               |           | CAV1   | CDCA8  |      |
|                                                               |           | EGR1   |        |      |
| Density of neurons                                            | M-1       | BMPR1A | TIAM1  |      |
|                                                               |           | TIAM1  |        |      |
| Quantity of endocrine cells                                   | M-1       |        | CCND3  |      |
|                                                               |           |        | E2F1   | E2F1 |
|                                                               |           | BMP4   |        |      |
| Formation of actin filaments                                  | M-1       | CAV1   | MYLK   |      |
|                                                               |           | TIAM1  | TIAM1  |      |
|                                                               |           | BMP4   |        |      |
| Migration of central nervous system cells                     | M-1       | BMPR1A | TIAM1  |      |
|                                                               |           | TIAM1  |        |      |

|                                                                |     |                                 |                  |        |  |
|----------------------------------------------------------------|-----|---------------------------------|------------------|--------|--|
|                                                                |     | BMP4                            |                  |        |  |
| Contact growth inhibition                                      | M-1 | BMPR1A<br>EGR1<br>IKZF3<br>CAV1 | CCND3            |        |  |
| Cell movement of fibroblasts                                   | M-1 | SKAP2<br>TIAM1                  | ENPP2<br>TIAM1   |        |  |
| Adhesion of breast cancer cell lines                           | M-1 | TIAM1                           | TIAM1            |        |  |
| Migration of brain cells                                       | M-1 | BMP4<br>BMPR1A<br>TIAM1         | TIAM1            |        |  |
| Contact growth inhibition of tumor cell lines                  | M-1 | BMP4<br>BMPR1A<br>EGR1          | CCND3            |        |  |
| Cell death of germ cells                                       | M-1 | EGR1                            | DNMT1            |        |  |
| Cell movement of brain cells                                   | M-1 | BMP4<br>BMPR1A<br>TIAM1         | TIAM1            |        |  |
| Destabilization of microtubules                                | M-1 | EGR1                            | KIF2C            |        |  |
| Cell movement of central nervous system cells                  | M-1 | BMP4<br>BMPR1A<br>CAV1<br>TIAM1 | TIAM1            |        |  |
| Cell death of gonadal cells                                    | M-1 | EGR1                            | DNMT1            |        |  |
| Density of dendritic spines                                    | M-1 | TIAM1                           | TIAM1            |        |  |
| Retraction of neurites                                         | M-1 | TIAM1                           | TIAM1            |        |  |
| Differentiation of skeletal muscle cells                       | M-1 | BMP4                            | AREG             |        |  |
| Cell death of superior cervical ganglion neurons               | M-1 |                                 | HSPB1            | HSPB1  |  |
| Binding of carcinoma cell lines                                | M-1 | CAV1<br>TIAM1                   | TIAM1            |        |  |
| Cell movement of squamous cell carcinoma cell lines            | M-3 |                                 | AURKA            | AURKA  |  |
| Interphase of kidney cell lines                                | M-1 |                                 | CCND3<br>E2F1    | E2F1   |  |
| Morphology of nervous system                                   | M-1 | BMP4<br>BMPR1A<br>EGR1<br>TIAM1 | CTNNA2<br>TIAM1  |        |  |
| Patterning of embryo                                           | M-1 |                                 | E2F1             | E2F1   |  |
| Penetration of microtubules                                    | M-1 | TIAM1                           | TIAM1            |        |  |
| Formation of coronary vessel                                   | M-1 |                                 | CDKN2B<br>TUBA1C | TUBA1C |  |
| Association of DNA damage focus                                | M-3 |                                 | PCNA             | PCNA   |  |
| Delay in mitosis of cervical cancer cell lines                 | M-3 |                                 | AURKA            | AURKA  |  |
| Assembly of central spindle                                    | M-3 |                                 | AURKA            | AURKA  |  |
| Acetylation of chromatin                                       | M-3 |                                 | PCNA             | PCNA   |  |
| Binding of plasmid DNA                                         | M-3 |                                 | PCNA             | PCNA   |  |
| Aneuploidy                                                     | M-3 |                                 | AURKA            | AURKA  |  |
| Modulation of microtubules                                     | M-3 |                                 | AURKA            | AURKA  |  |
| Mitotic catastrophe of rhabdoid cell lines                     | M-3 |                                 | AURKA            | AURKA  |  |
| Accumulation of pancreatic cancer cell lines                   | M-3 |                                 | AURKA            | AURKA  |  |
| Caspase-independent cell death of pancreatic cancer cell lines | M-3 |                                 | AURKA            | AURKA  |  |
| Sensitivity of gonadal cell lines                              | M-3 |                                 | PCNA             | PCNA   |  |

|                                                     |        |       |               |               |         |
|-----------------------------------------------------|--------|-------|---------------|---------------|---------|
| Survival of rhabdoid cell lines                     | M-3    |       | AURKA         | AURKA         |         |
| Mutagenesis of gene                                 | M-3    |       | PCNA          | PCNA          |         |
| Delay in cell cycle progression of tumor cell lines | M-3    |       | AURKA<br>PCNA | AURKA<br>PCNA |         |
| Apoptosis of rhabdoid cell lines                    | M-3    |       | AURKA         | AURKA         |         |
| G1/S phase transition of lung cell lines            | EGA1-1 |       | CCNA1         |               | CSNK2A1 |
| Duplication of body axis                            | EGA1-1 |       |               | LDLR          | LDLR    |
| Differentiation of plasma cells                     | EGA1-1 | CXCR4 | CXCR4         |               |         |
| Mobilization of mononuclear leukocytes              | EGA1-1 | CXCR4 | CXCR4         |               |         |
| Expansion of T-cell zone                            | EGA1-1 | CXCR4 | CXCR4         |               |         |
| Formation of marginal stream                        | EGA1-1 | CXCR4 | CXCR4         |               |         |
| Retention of granulocyte progenitors                | EGA1-1 | CXCR4 | CXCR4         |               |         |
| Morphology of Tip cells                             | EGA1-1 | CXCR4 | CXCR4         |               |         |
| Circulation of daunorubicin                         | EGA1-1 |       |               | LDLR          | LDLR    |
| Localization of cortical interneurons               | EGA1-1 | CXCR4 | CXCR4         |               |         |
| Polyploidization of epithelial cell lines           | EGA1-1 |       | TPX2          |               | TPX2    |
| Maintenance of central memory cytotoxic T cells     | EGA1-1 | CXCR4 | CXCR4         |               |         |
| Polyploidization of kidney cell lines               | EGA1-1 |       | TPX2          |               | TPX2    |
| Retention of pro-B lymphocytes                      | EGA1-1 | CXCR4 | CXCR4         |               |         |
| Morphology of osteoclasts                           | EGA1-1 |       |               | LDLR          | LDLR    |
| Formation of spindle apparatus                      | EGA1-1 |       | TPX2          |               | TPX2    |
| Engraftment of hematopoietic progenitor cells       | EGA1-1 | CXCR4 | CXCR4         |               |         |
| Quantity of alpha-tocopherol phosphate              | EGA1-1 |       |               | LDLR          | LDLR    |
| Invasion of B cell hybridoma cells                  | EGA1-1 | CXCR4 | CXCR4         |               |         |
| Invasion by boundary cap cells                      | EGA1-1 | CXCR4 | CXCR4         |               |         |
| Area of aortic valve                                | EGA1-1 |       |               | LDLR          | LDLR    |
| Formation of mucus                                  | EGA1-1 | CXCR4 | CXCR4         |               |         |
| Quantity of spirochete                              | EGA1-1 |       |               | LDLR          | LDLR    |
| Transmigration of endothelial tissue                | EGA1-1 | CXCR4 | CXCR4         |               |         |
| Maintenance of memory natural killer cells          | EGA1-1 | CXCR4 | CXCR4         |               |         |
| Deficiency of non-plasmacytoid dendritic cells      | EGA1-1 |       |               | LDLR          | LDLR    |
| Migration of dental pulp stem cells                 | EGA1-1 | CXCR4 | CXCR4         |               |         |
| Proliferation of pancreatic duct cells              | EGA1-1 | CXCR4 | CXCR4         |               |         |
| Extravasation of hepatoma cell lines                | EGA1-1 | CXCR4 | CXCR4         |               |         |
| Tubulation of tumor cell lines                      | EGA1-1 | CXCR4 | CXCR4         |               |         |
| Preservation of elastic lamina                      | EGA1-1 |       |               | LDLR          | LDLR    |
| Homing of progenitor cells                          | EGA1-1 | CXCR4 | CXCR4         |               |         |
| Extravasation of colorectal cancer cell lines       | EGA1-1 | CXCR4 | CXCR4         |               |         |



|                                                                          |        |       |       |                |        |     |                                             |
|--------------------------------------------------------------------------|--------|-------|-------|----------------|--------|-----|---------------------------------------------|
| Conversion of bile acid                                                  | EGA1-1 |       |       | LDLR           |        |     | LDLR                                        |
| Area of endothelial tube                                                 | EGA1-1 | CXCR4 | CXCR4 |                |        |     |                                             |
| Migration of mesenchymal stem cells                                      | EGA1-1 | CXCR4 | CXCR4 |                |        |     |                                             |
| Binding of guanosine 5'-O-(3-thiotriphosphate)                           | EGA1-1 | CXCR4 | CXCR4 |                |        |     |                                             |
| Invasion of cervical cancer cell lines                                   | EGA1-1 | CXCR4 | CXCR4 |                |        |     |                                             |
| Accumulation of kidney cell lines                                        | EGA1-1 |       | TPX2  |                |        |     | TPX2                                        |
| Length of endothelial tube                                               | EGA1-1 | CXCR4 | CXCR4 |                |        |     |                                             |
| Thickness of tunica intima                                               | EGA1-1 |       |       | LDLR           |        |     | LDLR                                        |
| Polarization of CD4+ T-lymphocytes                                       | EGA1-1 | CXCR4 | CXCR4 |                |        |     |                                             |
| Morphology of fibrous cap                                                | EGA1-1 |       |       | LDLR           |        |     | LDLR                                        |
| Binding of CD4+ T-lymphocytes                                            | EGA1-1 | CXCR4 | CXCR4 |                |        |     |                                             |
| Quantity of 1-palmitoyl-2-glutaroyl-sn-glycero-3-phosphorylcholine       | EGA1-1 |       |       | LDLR           |        |     | LDLR                                        |
| Migration of gastrointestinal stromal tumor cell lines                   | EGA1-1 | CXCR4 | CXCR4 |                |        |     |                                             |
| Chemotaxis of cerebellar granule cell                                    | EGA1-1 | CXCR4 | CXCR4 |                |        |     |                                             |
| Function of aortic valve                                                 | EGA1-1 |       |       | LDLR           |        |     | LDLR                                        |
| Trafficking of hematopoietic progenitor cells                            | EGA1-1 | CXCR4 | CXCR4 |                |        |     |                                             |
| Quantity of 1-palmitoyl-2-(5-oxovaleroyl)-sn-glycero-3-phosphorylcholine | EGA1-1 |       |       | LDLR           |        |     | LDLR                                        |
| Proliferation of central memory cytotoxic T cells                        | EGA1-1 | CXCR4 | CXCR4 |                |        |     |                                             |
| Formation of kinetochore microtubule                                     | EGA1-1 |       | TPX2  |                |        |     | TPX2                                        |
| Uptake of lipoprotein                                                    | EGA1-1 |       |       | LDLR           |        |     | LDLR                                        |
| Pre-TCR checkpoint of pro-T3 thymocytes                                  | EGA1-1 | CXCR4 | CXCR4 |                |        |     |                                             |
| Homologous recombination of cells                                        | EGA2-1 |       |       | RPS9           |        |     | COPS7A<br>HNRNPC<br>LSM4<br>SF3B5<br>SNRPD2 |
| Pluripotency of embryonic cell lines                                     | EGA2-1 |       |       |                | HNRNPK |     | HNF4A<br>RBM28                              |
| Pluripotency of embryonic stem cell lines                                | EGA2-1 |       |       |                | HNRNPK |     | RBM28                                       |
| Biosynthesis of nucleoside triphosphate                                  | EGA2-1 |       |       |                |        |     | HMGB1<br>INSR<br>SIRT1<br>TFAM              |
| Cell death of sarcoma cell lines                                         | EGA2-2 |       |       |                |        |     | HSPA5<br>VDAC2<br>HSPA5                     |
| Hydrolysis of ATP                                                        | EGA2-1 |       |       | APAF1<br>TOP2A |        |     | HMGB1                                       |
| Processing of RNA                                                        | EGA2-1 |       |       |                | HNRNPK |     | LAS1L<br>NPM1<br>SNRPA<br>SRSF1<br>PLD2     |
| Formation of microtubules                                                | EGA2-1 |       |       |                | TUBB   |     | RASSF1<br>ROCK1<br>KPNB1<br>TOMM40          |
| Internalization of protein                                               | EGA2-1 |       |       |                |        |     |                                             |
| Degradation of mitochondria                                              | EGA2-1 |       |       |                |        | BAX | SIRT1                                       |
| Premature senescence of fibroblast cell lines                            | EGA2-1 |       |       | EP300          |        |     | LATS1                                       |

|                                                |        |       |                                                                    |                 |                   |                |  |      |       |
|------------------------------------------------|--------|-------|--------------------------------------------------------------------|-----------------|-------------------|----------------|--|------|-------|
| Interphase of colorectal cancer cell lines     | EGA2-1 | EP300 | DYRK1B<br>LAS1L<br>NFYA<br>NPM1<br>NR5A2<br>RAD17<br>ST13<br>XRCC5 |                 |                   |                |  |      |       |
| Repair of DNA                                  | EGA2-2 |       |                                                                    |                 |                   |                |  |      | HMOX1 |
| Mitochondrial membrane potential               | EGA2-1 |       | BAX                                                                | HNF4A           |                   |                |  |      |       |
| Calcium homeostasis of endoplasmic reticulum   | EGA2-1 |       | BAX                                                                | HNF4A           |                   |                |  |      |       |
| Initiation of synthesis of protein             | EGA2-1 | EIF5  |                                                                    | EIF5            |                   |                |  |      |       |
| Development of embryonic stem cells            | EGA2-1 |       |                                                                    | NFYA<br>PTPN11  | SIRT1             |                |  |      |       |
| Arrest in growth of keratinocytes              | EGA2-1 | RARG  |                                                                    | RARG            |                   |                |  |      |       |
| Homeostasis of metal ion                       | EGA2-1 |       | BAX                                                                | HNF4A<br>SGK1   |                   |                |  |      |       |
| Structural integrity of nucleosomes            | EGA2-1 | TOP2A |                                                                    |                 | CEBPZ             |                |  |      |       |
| Delay in mitosis                               | EGA2-1 | TOP2A |                                                                    | KPNB1<br>RASSF1 |                   |                |  |      |       |
| Initiation of S phase of smooth muscle cells   | EGA2-2 |       |                                                                    | GATA6           | GATA6             |                |  |      |       |
| Quantity of carcinoma cell lines               | EGA2-2 |       |                                                                    |                 |                   |                |  | DSP  | HMOX1 |
| Cell viability of leukemia cell lines          | EGA2-2 |       |                                                                    | HSPA5           |                   | HSPA5          |  |      |       |
| Organization of myoepithelial cells            | EGA2-2 |       |                                                                    | DSC2            |                   |                |  | DSC2 |       |
| Folding of protein                             | EGA2-2 |       |                                                                    | HSPA5<br>HSPA8  |                   | HSPA5<br>HSPA8 |  |      |       |
| Morphogenesis of mammary alveolus              | EGA2-2 |       |                                                                    | DSC2            |                   |                |  | DSC2 |       |
| Import of DNA                                  | EGA2-2 |       |                                                                    | HSPA8           |                   | HSPA8          |  |      |       |
| Interphase of embryonic cell lines             | EGA2-2 |       |                                                                    | GATA6           | GATA6             |                |  |      |       |
| Pluripotency of fibroblast cell lines          | EGA2-2 |       |                                                                    | GATA6           | GATA6             |                |  |      |       |
| Morphology of heart cells                      | EGA2-2 |       |                                                                    | GATA6           | GATA6<br>MARCKSL1 |                |  |      |       |
| Quantity of intestinal cells                   | EGA2-2 |       |                                                                    | GATA6           | GATA6             |                |  |      |       |
| Organization of luminal epithelial cells       | EGA2-2 |       |                                                                    | DSC2            |                   |                |  | DSC2 |       |
| Reprogramming of embryonic cell lines          | EGA2-2 |       |                                                                    | GATA6           | GATA6             |                |  |      |       |
| Aneuploidy of ovarian cancer cell lines        | EGA2-2 |       |                                                                    | GATA6           | GATA6             |                |  |      |       |
| Quantity of lung cancer cell lines             | EGA2-2 |       |                                                                    |                 |                   |                |  | DSP  | HMOX1 |
| Dedifferentiation of gonadal cell lines        | EGA2-2 |       |                                                                    | GATA6           | GATA6             |                |  |      |       |
| Dissociation of vesicles                       | EGA2-2 |       |                                                                    | HSPA8           |                   | HSPA8          |  |      |       |
| Cytokinesis of ovarian cancer cell lines       | EGA2-2 |       |                                                                    | GATA6           | GATA6             |                |  |      |       |
| Formation of gamma H2AX nuclear focus          | EGA2-2 |       |                                                                    | XRCC5           |                   |                |  |      | HMOX1 |
| Concentration of linoleic acid                 | EGA2-2 |       |                                                                    | HSPA5           |                   | HSPA5          |  |      |       |
| Transport of calcifediol                       | EGA2-2 |       |                                                                    | HSPA8           |                   | HSPA8          |  |      |       |
| Dedifferentiation of ovarian cancer cell lines | EGA2-2 |       |                                                                    | GATA6           | GATA6             |                |  |      |       |
| Uptake of calcifediol                          | EGA2-2 |       |                                                                    | HSPA8           |                   | HSPA8          |  |      |       |

|                                                                 |        |        |        |          |          |          |      |
|-----------------------------------------------------------------|--------|--------|--------|----------|----------|----------|------|
| Reprogramming of embryonic stem cell lines                      | EGA2-2 |        |        | GATA6    | GATA6    |          |      |
| Activation of muscle cells                                      | EGA3-1 |        |        | LGALS3   | LEP      |          |      |
| Synthesis of hormone                                            | EGA3-4 | HOMER2 |        |          | ATF3     |          |      |
|                                                                 |        |        |        |          | PPARA    |          |      |
| Redistribution of phospholipid                                  | EGA3-4 | MARCKS | MARCKS |          |          |          |      |
| Synthesis of acylglycerol                                       | EGA3-4 | HOMER2 |        |          | PPARA    |          |      |
| Accumulation of phosphatidylinositol 4 5-diphosphate            | EGA3-4 | MARCKS | MARCKS |          |          |          |      |
| Ingestion by mice                                               | EGA3-4 | HOMER2 |        |          | PPARA    |          |      |
| Formation of membrane blebs                                     | EGA3-4 | MARCKS | MARCKS |          |          |          |      |
| Retention of phosphatidylinositol 4 5-diphosphate               | EGA3-4 | MARCKS | MARCKS |          |          |          |      |
| Reorganization of actin                                         | EGA3-4 | MARCKS | MARCKS |          |          |          |      |
| Trafficking of cells                                            | EGA3-4 | MARCKS | MARCKS |          |          |          |      |
| Binding of Ca2+                                                 | EGA3-4 | MARCKS | MARCKS |          |          |          |      |
| Clustering of phosphatidylinositol 4 5-diphosphate              | EGA3-4 | MARCKS | MARCKS |          |          |          |      |
| Quantity of actin cytoskeleton                                  | EGA3-4 | MARCKS | MARCKS |          |          |          |      |
| Necroptosis                                                     | EGA3-1 |        |        | ABCE1    | TNFRSF1A |          |      |
|                                                                 |        |        |        |          | GRB10    |          |      |
| Adipogenesis of lipid                                           | EGA3-1 |        |        | CEBPB    | TNFRSF1A |          |      |
|                                                                 |        |        |        |          | HSPD1    |          |      |
| Recovery of ATP                                                 | EGA3-1 |        |        | HSPE1    |          |          |      |
| Quantity of 1-palmitoyl-2-linoleoyl-sn-glycero-3-phosphocholine | EGA3-1 |        |        | LPCAT3   | LEP      |          |      |
| Secretion of sterol                                             | EGA3-1 |        |        | LPCAT3   | LEP      |          |      |
| Distribution of bladder cancer cell lines                       | EGA3-1 |        |        | POU5F1   | POU5F1   |          |      |
| Binding of cAMP response element                                | EGA3-1 |        |        |          | CEBPB    | LEP      |      |
| Self-renewal of embryonic stem cells                            | EGA3-1 |        |        | POU5F1   | GNL3     |          |      |
|                                                                 |        |        |        |          | POU5F1   |          |      |
| Stimulation of fibroblasts                                      | EGA3-1 |        |        | POU5F1   | LGALS3   |          |      |
|                                                                 |        |        |        |          | POU5F1   |          |      |
| Regulation of hormone                                           | EGA3-1 |        |        |          | SHBG     | LEP      |      |
| Dedifferentiation of trophectoderm cells                        | EGA3-1 |        |        | POU5F1   | POU5F1   |          |      |
| Development of induced pluripotent stem cells                   | EGA3-1 |        |        | POU5F1   | POU5F1   |          |      |
| Morphology of stomach cancer cell lines                         | EGA3-1 |        |        | POU5F1   | POU5F1   |          |      |
| Conversion of coenzyme A                                        | EGA3-1 |        |        |          | ACLY     |          | ACLY |
| Growth of uterus                                                | EGA3-1 |        |        |          | CEBPB    | LEP      |      |
|                                                                 |        |        |        |          | IGF1     | IGF1     |      |
| Transport of carboxylic acid                                    | EGA4-1 |        |        | SLC25A13 | SLC25A20 | SLC25A20 |      |
|                                                                 |        |        |        |          | SLC25A20 |          |      |
| Quantity of blood vessel                                        | EGA4-1 | BMP2   |        | HNF1B    |          |          |      |
| Branching of axons                                              | EGA4-1 |        |        | APP      |          |          | APP  |
|                                                                 |        |        |        | NUAK1    |          |          |      |
| Transport of ion                                                | EGA4-1 |        |        | IGF1     | IGF1     |          |      |
|                                                                 |        |        |        | SLC25A20 | SLC25A20 |          |      |
| Transport of cation                                             | EGA4-1 |        |        | IGF1     | IGF1     |          |      |
|                                                                 |        |        |        | SLC25A20 | SLC25A20 |          |      |
| Quantity of glycosylceramide                                    | EGA4-1 |        |        | IGF1     | PSAP     | IGF1     |      |
| Migration of prostate cancer cell lines                         | EGA4-1 |        |        | IGF1     | VTN      | IGF1     |      |
| Metabolism of hydrogen peroxide                                 | EGA4-1 |        |        | APP      |          |          | APP  |

|                                             |        |      |           |          |     |
|---------------------------------------------|--------|------|-----------|----------|-----|
| Accumulation of glycosphingolipid           | EGA4-1 |      | APP HEXA  |          | APP |
| Quantity of cerebroside                     | EGA4-1 |      | PSAP      |          |     |
|                                             |        |      | IGF1      | IGF1     |     |
| Accumulation of polysaccharide              | EGA4-1 | BMP2 | APOA1     |          |     |
|                                             |        |      | HEXA      |          |     |
|                                             |        |      | SLC37A4   |          |     |
| Cellular infiltration by lymphocytes        | EGA4-1 |      | APOA1     |          | APP |
|                                             |        |      | APP TIMP3 |          |     |
| Morphology of mesangial cells               | EGA4-1 |      | IGF1      | IGF1     |     |
| Dissemination of prostate cancer cell lines | EGA4-1 |      | IGF1      | IGF1     |     |
| Release of cholesterol                      | EGA4-1 |      | APOA1     |          | APP |
| Formation of cochlear duct                  | EGA4-1 |      | APP       |          |     |
|                                             |        |      | IGF1      | IGF1     |     |
| Morphology of gland                         | EGA4-1 |      | HNF1B     |          |     |
|                                             |        |      | IGF1      | IGF1     |     |
|                                             |        |      | TCF7L2    |          |     |
| Development of chondrocytes                 | EGA4-1 | BMP2 |           | GRN      |     |
| Distribution of lipid                       | EGA4-1 |      | APP       |          | APP |
| Area of muscle cells                        | EGA4-1 |      | IGF1      | IGF1     |     |
| Proliferation of anterior pituitary cells   | EGA4-1 |      | IGF1      | IGF1     |     |
| Adhesion of neuroglia                       | EGA4-1 |      | APP VTN   |          | APP |
| Stabilization of intercellular junctions    | EGA4-1 |      | IGF1      | IGF1     |     |
| Relengthening of cardiomyocytes             | EGA4-1 |      | IGF1      | IGF1     |     |
| Chondrogenesis of fibroblast cell lines     | EGA4-1 | BMP2 |           | GRN      |     |
| Catabolism of hydrogen peroxide             | EGA4-1 |      | APP       |          | APP |
| Invasion of myeloma cell lines              | EGA4-1 |      | IGF1      | IGF1     |     |
|                                             |        |      | NUAK1     |          |     |
| Homeostasis of neurons                      | EGA4-1 |      | APP       |          | APP |
| Proliferation of stromal cell lines         | EGA4-1 |      | IGF1 LGRS | IGF1     |     |
| Size of leukocytes                          | EGA4-1 |      | APP       |          | APP |
| Chondrogenesis of embryonic cell lines      | EGA4-1 | BMP2 |           | GRN      |     |
| Pyknosis                                    | EGA4-1 |      | APP       |          | APP |
| Release of hydrogen peroxide                | EGA4-1 |      | IGF1      | GRN IGF1 |     |
| Active avoidance response                   | EGA4-1 |      | APP       |          | APP |
| Neuroprotection of tumor cell lines         | EGA4-1 |      | APP       |          | APP |
| Density of microglia                        | EGA4-1 |      | APP       |          | APP |
| Rearrangement of actin stress fibers        | EGA4-1 |      | IGF1      | IGF1     |     |
| Density of macrophages                      | EGA4-1 |      | APP       |          | APP |
| Migration of endometrial cancer cell lines  | EGA4-1 |      | FOXA1     | IGF1     |     |
|                                             |        |      | IGF1      |          |     |
| Regeneration of bone                        | EGA4-1 | BMP2 |           | GRN      |     |
| Mitogenesis of central nervous system cells | EGA4-1 |      | IGF1      | IGF1     |     |
| Quantity of sulfatides                      | EGA4-1 |      | IGF1 PSAP | IGF1     |     |
|                                             |        |      | HNF1B     |          |     |
| Morphology of pancreas                      | EGA4-1 |      | IGF1      | IGF1     |     |
|                                             |        |      | TCF7L2    |          |     |
| Binding of cholesterol                      | EGA4-1 |      | APOA1     |          | APP |
|                                             |        |      | APP       |          |     |
| Quantity of ganglioside GD3                 | EGA4-1 |      | APP       |          | APP |
| Aggregation of filaments                    | EGA4-1 |      | APP       |          | APP |

|                                                   |        |                                         |                                            |       |               |          |      |           |
|---------------------------------------------------|--------|-----------------------------------------|--------------------------------------------|-------|---------------|----------|------|-----------|
| Thickness of cortical bone                        | EGA4-1 |                                         |                                            |       |               | IGF1     | IGF1 |           |
| Size of pancreas                                  | EGA4-1 |                                         |                                            |       |               | IGF1     | IGF1 |           |
| Binding of cell surface                           | EGA4-1 |                                         |                                            |       |               | TCF7L2   | IGF1 |           |
| Regression of embryonic tissue                    | EGA4-1 | WNT7A                                   | WNT7A                                      |       |               | IGF1 VTN | IGF1 |           |
| Invasion of lymphoma cell lines                   | EGA4-1 |                                         |                                            |       |               | IGF1     | IGF1 |           |
| Distribution of cholesterol                       | EGA4-1 |                                         |                                            |       |               | NUAK1    |      | APP       |
| Context memory                                    | EGA4-1 |                                         |                                            |       |               | APP      |      | APP       |
| Oxidation of cholesterol                          | EGA4-1 |                                         |                                            |       |               | APP      |      | APP       |
| Mitogenesis of neuroglia                          | EGA4-1 |                                         |                                            |       |               | IGF1     | IGF1 |           |
| Morphology of prostate cell lines                 | EGA4-1 |                                         |                                            |       |               | IGF1     | IGF1 |           |
| Shortening of cardiomyocytes                      | EGA4-1 |                                         |                                            |       |               | IGF1     | IGF1 |           |
| Quantity of lymphocytes                           | EGA4-3 |                                         |                                            |       |               |          | CTSB | CD47 PLP1 |
| Cell movement of granulocytes                     | EGA4-3 |                                         |                                            |       |               |          | CTSB | CD47 PLP1 |
| Cellular infiltration by granulocytes             | EGA4-3 |                                         |                                            |       |               |          | CTSB | CD47 PLP1 |
| Proliferation of neuronal cells                   | M-1    | BMP4<br>BMPR1A<br>CAV1<br>EGR1<br>TIAM1 | E2F1<br>TIAM1<br>WVVOX                     |       | E2F1          |          |      |           |
| Development of neurons                            | M-1    | BMP4<br>CAV1<br>EGR1<br>TIAM1           | CTNNA2<br>DNMT1<br>HSPB1<br>TIAM1<br>WVVOX |       | HSPB1         |          |      |           |
| Migration of neurons                              | M-1    | BMP4<br>BMPR1A<br>TIAM1                 | ERRF1<br>KIF20B<br>TIAM1                   |       | ERRF1         |          |      |           |
| Interaction of tumor cell lines                   | M-1    | CAV1<br>EGR1<br>TIAM1                   | E2F1<br>TIAM1<br>WVVOX                     |       | E2F1          |          |      |           |
| Cell cycle progression of tumor cell lines        | M-1    | BMP4<br>CAV1<br>EGR1                    | CLSPN<br>E2F1<br>ERRF1<br>MELK<br>WVVOX    |       | E2F1<br>ERRF1 |          |      |           |
| Proliferation of lymphatic system cells           | M-3    |                                         | BRCA1<br>MYBL1<br>RGS2                     | BRCA1 | BRCA1         |          |      |           |
| Cell cycle progression of fibroblast cell lines   | M-1    | CAV1<br>RUNX2                           | E2F1                                       |       | E2F1          |          |      |           |
| Proliferation of leukemia cell lines              | M-1    | BMP4<br>EGR1<br>RUNX2                   | E2F1<br>WVVOX                              |       | E2F1          |          |      |           |
| Proliferation of lymphocytes                      | M-3    |                                         | BRCA1<br>MYBL1<br>RGS2                     | BRCA1 | BRCA1         |          |      |           |
| Differentiation of hematopoietic progenitor cells | M-1    | BMP4<br>CD86<br>EGR1<br>RUNX2           | CDKN2B<br>E2F1<br>SATB1                    |       | E2F1          |          |      |           |
| Differentiation of hematopoietic cells            | M-1    | BMP4<br>CD86<br>EGR1<br>RUNX2           | CDKN2B<br>E2F1<br>SATB1                    |       | E2F1          |          |      |           |
| Expansion of cells                                | M-3    |                                         | BRCA1<br>MYBL1                             | BRCA1 | BRCA1         |          |      |           |

|                                                               |        |                               |                         |       |       |                |                                 |                         |
|---------------------------------------------------------------|--------|-------------------------------|-------------------------|-------|-------|----------------|---------------------------------|-------------------------|
| Cell proliferation of T lymphocytes                           | M-3    |                               | BRCA1<br>RGS2           |       | BRCA1 | BRCA1          |                                 |                         |
| Proliferation of prostate cancer cell lines                   | M-3    |                               | BRCA1<br>NCOA3          |       | BRCA1 | BRCA1          |                                 |                         |
| Cell death of blood cells                                     | M-3    |                               | BRCA1<br>PCNA           |       | BRCA1 | BRCA1<br>PCNA  |                                 |                         |
| Arrest in proliferation of cells                              | M-1    | BMP4<br>CAV1<br>EGR1<br>RUNX2 | CCND3<br>CDKN2B<br>E2F1 |       |       |                | E2F1                            |                         |
| Morphology of exocrine cells                                  | M-1    | CAV1                          | E2F1                    |       |       |                | E2F1                            |                         |
| Breakage of double-stranded DNA                               | M-3    |                               | BRCA1<br>PCNA           |       | BRCA1 | BRCA1<br>PCNA  |                                 |                         |
| Proliferation of epiblast cells                               | M-3    |                               | BRCA1                   |       | BRCA1 | BRCA1          |                                 |                         |
| Cell spreading of gonadal cell lines                          | M-3    |                               | BRCA1                   |       | BRCA1 | BRCA1          |                                 |                         |
| Derepression of RNA                                           | M-3    |                               | BRCA1                   |       | BRCA1 | BRCA1          |                                 |                         |
| Delay in mitosis of tumor cell lines                          | M-3    |                               | AURKA<br>BRCA1          |       | BRCA1 | AURKA<br>BRCA1 |                                 |                         |
| Arrest in cell cycle progression of embryonic stem cell lines | M-3    |                               | BRCA1                   |       | BRCA1 | BRCA1          |                                 |                         |
| Healing of gonadal cell lines                                 | M-3    |                               | BRCA1                   |       | BRCA1 | BRCA1          |                                 |                         |
| Nucleation of filaments                                       | M-3    |                               | BRCA1                   |       | BRCA1 | BRCA1          |                                 |                         |
| Cell movement of gonadal cell lines                           | M-3    |                               | BRCA1                   |       | BRCA1 | BRCA1          |                                 |                         |
| Meiosis of germ cells                                         | M-3    |                               | AURKA<br>BRCA1          |       | BRCA1 | AURKA<br>BRCA1 |                                 |                         |
| Delay in initiation of cell spreading of gonadal cell lines   | M-3    |                               | BRCA1                   |       | BRCA1 | BRCA1          |                                 |                         |
| Micronucleation of breast cancer cell lines                   | M-3    |                               | BRCA1                   |       | BRCA1 | BRCA1          |                                 |                         |
| Quantity of hair follicle                                     | M-3    |                               | BRCA1                   |       | BRCA1 | BRCA1          |                                 |                         |
| Differentiation of mammary gland                              | M-3    |                               | BRCA1                   |       | BRCA1 | BRCA1          |                                 |                         |
| Delay in mitosis of breast cancer cell lines                  | M-3    |                               | BRCA1                   |       | BRCA1 | BRCA1          |                                 |                         |
| Morphogenesis of gland                                        | M-3    |                               | BRCA1                   |       | BRCA1 | BRCA1          |                                 |                         |
| Size of gonad                                                 | M-3    |                               | BRCA1                   |       | BRCA1 | BRCA1          |                                 |                         |
| Morphology of reproductive system                             | M-3    |                               | BRCA1<br>NCOA3          |       | BRCA1 | BRCA1          |                                 |                         |
| S phase of fibroblast cell lines                              | M-3    |                               | BRCA1<br>NCOA3          |       | BRCA1 | BRCA1          |                                 |                         |
| Branching of mammary gland                                    | M-3    |                               | BRCA1                   |       | BRCA1 | BRCA1          |                                 |                         |
| Expansion of basal stem cells                                 | M-3    |                               | BRCA1                   |       | BRCA1 | BRCA1          |                                 |                         |
| Binding of p53 consensus binding site                         | M-3    |                               | BRCA1                   |       | BRCA1 | BRCA1          |                                 |                         |
| Myelination of corpus callosum                                | EGA1-1 | CXCR4                         |                         | CXCR4 |       |                | PRMT1                           |                         |
| Mitosis of cervical cancer cell lines                         | EGA1-1 | TUBA1A                        | TPX2                    |       |       |                | TPX2                            |                         |
| Invasion of lung cancer cell lines                            | EGA1-1 | CXCR4                         |                         | CXCR4 |       |                | PRMT1                           |                         |
| Repression of RNA                                             | EGA2-1 |                               |                         |       |       |                | EED<br>HMGB1<br>SAP18<br>ZNF589 | KLF10<br>SIRT1<br>TGIF1 |
| Inhibition of leukocytes                                      | EGA2-1 |                               |                         |       |       | EP300          | CD46 HLA-C HLA-G<br>HMGB1       | KLF10                   |
| Autophagy of embryonic cell lines                             | EGA2-1 |                               |                         |       |       | TUFM           | HMGB1                           | ULK2                    |

|                                                   |        |                  |                |        |        |        |                          |                  |               |
|---------------------------------------------------|--------|------------------|----------------|--------|--------|--------|--------------------------|------------------|---------------|
| Autophagy of bone cancer cell lines               | EGA2-1 |                  | EP300          |        | BAX    |        | SIRT1                    |                  |               |
| Cell death of ovarian cancer cell lines           | EGA2-1 |                  |                |        | GAPDH  | GAPDH  | RASSF1                   | GAPDH            |               |
| Apoptosis of ovarian cancer cell lines            | EGA2-1 |                  |                |        | GAPDH  | GAPDH  | RASSF1                   | GAPDH            |               |
| Cell death of bone cancer cell lines              | EGA2-1 |                  | HAT1<br>RRP1B  | CDK6   | BAX    |        |                          |                  |               |
| Quantity of hematopoietic progenitor cells        | EGA2-2 |                  |                | RPS6   |        |        | RPS6                     |                  | RPS6          |
| Interphase of fibroblast cell lines               | EGA2-1 |                  | EP300<br>TOP2A |        |        |        | LATS1<br>PPP5C           | SIRT1            |               |
| Cell proliferation of carcinoma cell lines        | EGA2-2 |                  |                |        |        |        | PTPN11<br>EPCAM<br>GATA6 | GATA6            | HMOX1         |
| Amplification of centrosome                       | EGA2-1 |                  | YBX1           |        |        |        | NPM1<br>PTPN11<br>YBX1   | YBX1             |               |
| Maturation of connective tissue                   | EGA2-2 |                  |                | RPS6   |        |        | RPS6                     |                  | HMOX1<br>RPS6 |
| Cell death of stem cells                          | EGA2-1 |                  | APAF1          |        | ID2    |        | PTPN11<br>RAD17          |                  |               |
| Cell cycle progression of fibroblasts             | EGA2-1 |                  |                |        | ID2    |        | E2F5 NFYA<br>NPM1        | INSR             |               |
| Morphology of epithelial cell lines               | EGA2-1 |                  |                |        |        | BAX    | HNF4A<br>PTPN11<br>SRSF1 | SIRT1            |               |
| Cell cycle progression of connective tissue cells | EGA2-1 |                  |                |        | ID2    |        | E2F5 NFYA<br>NPM1        | INSR             |               |
| Elongation of protein                             | EGA2-1 |                  |                | RPS6   |        |        | RPS6                     |                  | RPS6          |
| Survival of yeast                                 | EGA2-1 |                  | TOP2A          |        |        | BAX    | RAD17                    |                  |               |
| Exit from G1 phase                                | EGA2-1 |                  | EP300          | CDK6   |        |        | RASSF1                   |                  |               |
| Maturation of red blood cells                     | EGA2-2 |                  |                | RPS6   |        |        | RPS6                     |                  | RPS6          |
| Arrest in G1 phase of carcinoma cell lines        | EGA2-2 |                  |                | RPS6   |        |        | RPS6                     |                  | RPS6          |
| Maturation of hematopoietic progenitor cells      | EGA2-2 |                  |                | RPS6   |        |        | RPS6                     |                  | RPS6          |
| Stress response of tumor cell lines               | EGA2-2 |                  |                |        |        |        | HSPA5                    | HSPA5            | HMOX1         |
| Organization of muscle cells                      | EGA2-2 |                  |                |        |        |        | DSC2                     | MARCKSL1         | DSC2          |
| Quantity of ribosome                              | EGA2-2 |                  |                | RPS6   |        |        | RPS6                     |                  | RPS6          |
| Permeability transition of mitochondria           | EGA2-2 |                  |                |        |        |        | HSPA5                    | COX4I1           | HSPA5         |
| Outgrowth of dendrites                            | EGA2-2 |                  |                | RPS6   |        |        | RPS6                     |                  | RPS6          |
| Binding of ribosome                               | EGA2-2 |                  | EEF1B2         |        |        |        | HSPA5                    | HSPA5            |               |
| Arrest in interphase of carcinoma cell lines      | EGA2-2 |                  |                | RPS6   |        |        | RPS6                     |                  | RPS6          |
| Apoptosis of central nervous system cells         | EGA3-1 |                  |                |        |        |        | YWHAB                    | LEP<br>TNFRSF1A  | P4HB          |
| Secretion of fatty acid                           | EGA3-1 |                  |                |        |        |        | SCD                      | ACSL4 SCD        | SCD           |
| Growth of blastocyst                              | EGA3-1 |                  |                |        |        | POU5F1 | POU5F1                   | LEP              |               |
| Entry into mitosis                                | EGA3-1 |                  |                |        | TP53I3 | POU5F1 | GNL3<br>POU5F1           |                  |               |
| Concentration of acyl-coenzyme A                  | EGA3-1 |                  |                |        |        |        | ACLY SCD                 | LEP SCD          | ACLY SCD      |
| Sensitivity of cells                              | EGA3-1 |                  |                |        |        |        | SCD                      | SCD              | SCD           |
| Insulin sensitivity                               | EGA3-1 |                  |                |        |        |        | SCD                      | GRB10 LEP<br>SCD | SCD           |
| Mitogenesis                                       | EGA3-4 | MARCKS           |                | MARCKS |        |        |                          | PPARA            |               |
| Behavior                                          | EGA3-4 | HOMER2<br>MARCKS |                | MARCKS |        |        |                          | PPARA            |               |

|                                            |        |        |        |                 |           |          |
|--------------------------------------------|--------|--------|--------|-----------------|-----------|----------|
| Morphology of fibroblast cell lines        | EGA3-4 | MARCKS | MARCKS | ATF3            |           |          |
| Quantity of stearyl-coenzyme A             | EGA3-1 |        |        | SCD             | SCD       | SCD      |
| Desaturation of palmitoyl-coenzyme A       | EGA3-1 |        |        | SCD             | SCD       | SCD      |
| Synthesis of cholesterol ester             | EGA3-1 |        |        | SCD             | LEP SCD   | SCD      |
| Desaturation of stearyl-coenzyme A         | EGA3-1 |        |        | SCD             | SCD       | SCD      |
| Morphology of epithelial cells             | EGA3-1 |        | POU5F1 | POU5F1          | LEP       |          |
| Concentration of long chain fatty acid     | EGA3-1 |        |        | ACLY SCD        | SCD       | ACLY SCD |
| Glycogenolysis                             | EGA3-1 |        |        | CEBPB SCD       | LEP SCD   | SCD      |
| Sensitivity of connective tissue cells     | EGA3-1 |        |        | SCD             | SCD       | SCD      |
| Entry into mitosis of tumor cell lines     | EGA3-1 |        | TP53I3 | POU5F1          | POU5F1    |          |
| Concentration of 18:1(n-9) fatty acids     | EGA3-1 |        |        | ACLY SCD        | SCD       | ACLY SCD |
| Quantity of fat                            | EGA3-1 |        |        | SCD             | LEP SCD   | SCD      |
| Incorporation of phosphatidylinositol      | EGA3-1 |        |        | ACLY            | ACSL4     | ACLY     |
| Oxidation of palmitoyl-coenzyme A          | EGA3-1 |        |        | ACOX1 SCD       | SCD       | SCD      |
| Desaturation of palmitoleic acid           | EGA3-1 |        |        | SCD             | SCD       | SCD      |
| Modification of long-chain acyl-coenzyme A | EGA3-1 |        |        | ACOX1 CPT1B SCD | CPT1B SCD | SCD      |
| Quantity of palmitoyl-coenzyme A           | EGA3-1 |        |        | SCD             | SCD       | SCD      |
| Quantity of monounsaturated fatty acids    | EGA3-1 |        |        | ACLY SCD        | LEP SCD   | ACLY SCD |
| Concentration of malonyl-coenzyme A        | EGA3-1 |        |        | ACLY SCD        | LEP SCD   | ACLY SCD |
| Incorporation of arachidonic acid          | EGA3-1 |        |        | ACLY            | ACSL4     | ACLY     |
| Incorporation of carbohydrate              | EGA3-1 |        |        | ACLY SCD        | ACSL4 SCD | ACLY SCD |
| Accumulation of fatty acid                 | EGA3-1 |        |        | ACOX1 SCD       | LEP SCD   | SCD      |
| Proliferation of trophoblast cells         | EGA3-1 |        | POU5F1 | POU5F1          | LEP       |          |
| Glycogenolysis of liver                    | EGA3-1 |        |        | SCD             | LEP SCD   | SCD      |
| Morphology of mitochondria                 | EGA3-1 |        |        | PINK1 SCD       | LEP SCD   | SCD      |
| Accumulation of palmitoleic acid           | EGA3-1 |        |        | SCD             | SCD       | SCD      |
| Desaturation of palmitic acid              | EGA3-1 |        |        | SCD             | SCD       | SCD      |
| Proliferation of chondrocytes              | EGA4-1 | BMP2   |        | IGF1            | GRN IGF1  |          |
| Axonogenesis                               | EGA4-1 |        |        | APP IGF1 NUAKE1 | IGF1      | APP      |
| Quantity of glycosphingolipid              | EGA4-1 |        |        | APP IGF1 PSAP   | IGF1      | APP      |
| Differentiation of oligodendrocytes        | EGA4-1 | BMP2   |        | IGF1 TCF7L2 VTN | IGF1      |          |
| Quantity of smooth muscle cells            | EGA4-1 |        |        | APP IGF1 TIMP3  | IGF1      | APP      |
| Homeostasis of ion                         | EGA4-1 |        |        | APP IGF1        | IGF1      | APP      |



|                                                |        |     |     |      |                                   |         |          |     |
|------------------------------------------------|--------|-----|-----|------|-----------------------------------|---------|----------|-----|
| Cell death of eye cells                        | EGA4-1 |     |     |      | APP CDHR1<br>IGF1<br>TIMP3<br>VTN | IGF1    |          | APP |
| Quantity of muscle                             | EGA4-1 |     |     |      | APOA1<br>APP IGF1<br>TIMP3        | IGF1    |          | APP |
| Accumulation of carbohydrate                   | EGA4-1 |     |     | BMP2 | APOA1<br>APP HEXA<br>SLC37A4      |         |          | APP |
| Apoptosis of bone marrow cell lines            | EGA4-1 |     |     | BMP2 |                                   | IGF1    | IGF1     |     |
| Cell death of retinal cells                    | EGA4-1 |     |     |      | APP CDHR1<br>IGF1<br>TIMP3<br>VTN | IGF1    |          | APP |
| Apoptosis of pheochromocytoma cell lines       | EGA4-1 |     |     |      | APP IGF1<br>PSAP                  | IGF1    |          | APP |
| Signaling of cells                             | EGA4-1 |     |     |      | APP IGF1                          | IGF1    |          | APP |
| Synthesis of cartilage matrix                  | EGA4-1 |     |     | BMP2 |                                   | IGF1    | IGF1     |     |
| Excitation of neurons                          | EGA4-1 |     |     |      | APP IGF1                          | IGF1    |          | APP |
| Inhibition of mRNA                             | EGA4-1 |     |     | BMP2 |                                   | IGF1    | IGF1     |     |
| Thickening of basement membrane                | EGA4-1 |     |     |      | APP IGF1                          | IGF1    |          | APP |
| Morphology of trabecular bone                  | EGA4-1 |     |     | BMP2 |                                   | IGF1    | IGF1     |     |
| Binding of phospholipid                        | EGA4-1 |     |     |      | APP IGF1<br>PSAP                  | IGF1    |          | APP |
| Neurogenesis of brain cells                    | EGA4-1 |     |     |      | APP IGF1                          | IGF1    |          | APP |
| Cell viability of vascular smooth muscle cells | EGA4-1 |     |     |      | APP IGF1                          | IGF1    |          | APP |
| Modification of connective tissue              | EGA4-1 |     |     | BMP2 |                                   | IGF1    | GRN IGF1 |     |
| Mitogenesis of fibroblast cell lines           | EGA4-1 |     |     | BMP2 |                                   | IGF1    | IGF1     |     |
| Metabolism of cholesterol                      | EGA4-1 |     |     |      | APOA1<br>APP<br>CYP51A1<br>HNF1B  | CYP51A1 |          | APP |
| Generation of embryonic cell lines             | EGA4-1 |     |     | BMP2 |                                   | IGF1    | GRN IGF1 |     |
| Homeostasis of Ca <sup>2+</sup>                | EGA4-1 |     |     |      | APP IGF1                          | IGF1    |          | APP |
| Volume of cerebrum                             | EGA4-1 |     |     |      | APP IGF1                          | IGF1    |          | APP |
| Stimulation of red blood cells                 | EGA4-1 |     |     | BMP2 |                                   | IGF1    | IGF1     |     |
| Surface area of bone                           | EGA4-1 |     |     |      | APP IGF1                          | IGF1    |          | APP |
| Deposition of proteoglycan                     | EGA4-1 |     |     | BMP2 |                                   | IGF1    | IGF1     |     |
| Density of synapse                             | EGA4-1 |     |     |      | APP                               | GRN     |          | APP |
| Storage of glycogen                            | EGA4-1 |     |     | BMP2 |                                   | APP     |          | APP |
| Cytotoxicity of neurons                        | EGA4-1 |     |     |      | APP IGF1                          | IGF1    |          | APP |
| Differentiation of cholinergic neurons         | EGA4-1 |     |     | BMP2 |                                   | IGF1    | IGF1     |     |
| Stimulation of brain cells                     | EGA4-1 |     |     |      | APP IGF1                          | IGF1    |          | APP |
| Anxiety-like behavior                          | EGA4-1 |     |     |      | APP IGF1                          | IGF1    |          | APP |
| Stimulation of chondrocytes                    | EGA4-1 |     |     | BMP2 |                                   | IGF1    | IGF1     |     |
| Differentiation of stromal cell lines          | EGA4-1 |     |     | BMP2 |                                   | IGF1    | IGF1     |     |
| Area of cells                                  | EGA4-1 |     |     |      | APP IGF1<br>TCF7L2                | IGF1    |          | APP |
| Growth of metatarsal bone                      | EGA4-1 |     |     | BMP2 |                                   | IGF1    | GRN IGF1 |     |
| Catabolism of D-glucose                        | EGA1-1 | MYC | MYC | MYC  |                                   | MYC     |          |     |

|                                                           |        |              |     |          |                |
|-----------------------------------------------------------|--------|--------------|-----|----------|----------------|
| G1 phase of lung cell lines                               | EGA1-1 | CCNA1<br>MYC | MYC | MYC      | CSNK2A1<br>MYC |
| Arrest in cell cycle progression of B lymphocytes         | EGA1-1 | MYC          | MYC | MYC      | MYC<br>PCGF2   |
| Delay in cell cycle progression of fibroblast cell lines  | EGA1-1 | MYC          | MYC | MYC      | MYC<br>PRMT1   |
| Entry into mitosis of fibroblast cell lines               | EGA1-1 | CCNA1<br>MYC | MYC | MYC      | MYC            |
| Rearrangement of chromosomes                              | EGA1-1 | MYC          | MYC | MYC      | MYC<br>PRMT1   |
| Delay in cell cycle progression                           | EGA1-1 | MYC          | MYC | MYC      | MYC<br>PRMT1   |
| Arrest in proliferation of lung cell lines                | EGA1-1 | MYC          | MYC | MYC      | MYC<br>PRMT1   |
| Transcription of mRNA                                     | EGA1-1 | MYC          | MYC | LDLR MYC | LDLR MYC       |
| Synthesis of rRNA                                         | EGA1-1 | MYC          | MYC | MYC      | MYC            |
| Depletion of ATP                                          | EGA1-1 | MYC          | MYC | MYC      | MYC            |
| Incorporation of octanoic acid                            | EGA1-1 | MYC          | MYC | MYC      | MYC            |
| Ploidy of keratinocytes                                   | EGA1-1 | MYC          | MYC | MYC      | MYC            |
| Cloning of melanoma cell lines                            | EGA1-1 | MYC          | MYC | MYC      | MYC            |
| Gene amplification of B-lymphocyte derived cell lines     | EGA1-1 | MYC          | MYC | MYC      | MYC            |
| Size of lymphatic sinus                                   | EGA1-1 | MYC          | MYC | MYC      | MYC            |
| Entrance of DNA                                           | EGA1-1 | MYC          | MYC | MYC      | MYC            |
| Polyploidization of B-lymphocyte derived cell lines       | EGA1-1 | MYC          | MYC | MYC      | MYC            |
| Formation of extrachromosomal cores                       | EGA1-1 | MYC          | MYC | MYC      | MYC            |
| Flow of lymphatic fluid                                   | EGA1-1 | MYC          | MYC | MYC      | MYC            |
| Quantity of lymphatic sinus                               | EGA1-1 | MYC          | MYC | MYC      | MYC            |
| Initiation of differentiation of epidermal cells          | EGA1-1 | MYC          | MYC | MYC      | MYC            |
| Replicative senescence of ovarian cancer cell lines       | EGA1-1 | MYC          | MYC | MYC      | MYC            |
| Killing of B cell hybridoma cells                         | EGA1-1 | MYC          | MYC | MYC      | MYC            |
| Formation of replication fork                             | EGA1-1 | MYC          | MYC | MYC      | MYC            |
| Arrest in G1/S phase transition of endothelial cell lines | EGA1-1 | MYC          | MYC | MYC      | MYC            |
| Cell division of lymphoma cell lines                      | EGA1-1 | MYC          | MYC | MYC      | MYC            |
| Elimination of leukemia cell lines                        | EGA1-1 | MYC          | MYC | MYC      | MYC            |
| Immortalization of leukocyte cell lines                   | EGA1-1 | MYC          | MYC | MYC      | MYC            |
| Arrest in G1/S phase transition of breast cell lines      | EGA1-1 | MYC          | MYC | MYC      | MYC            |
| Accumulation of glutamine                                 | EGA1-1 | MYC          | MYC | MYC      | MYC            |
| Catabolism of glutamine                                   | EGA1-1 | MYC          | MYC | MYC      | MYC            |
| Differentiation of cholangiocarcinoma cell lines          | EGA1-1 | MYC          | MYC | MYC      | MYC            |
| Arrest in G2/M phase transition of keratinocytes          | EGA1-1 | MYC          | MYC | MYC      | MYC            |
| Senescence of B lymphocytes                               | EGA1-1 | MYC          | MYC | MYC      | MYC            |

|                                                                          |        |       |     |       |                |      |              |         |       |
|--------------------------------------------------------------------------|--------|-------|-----|-------|----------------|------|--------------|---------|-------|
| Beta-oxidation of octanoic acid                                          | EGA1-1 | MYC   | MYC | MYC   |                |      |              | MYC     |       |
| Expansion of pro-B lymphocytes                                           | EGA1-1 | MYC   | MYC | MYC   |                |      |              | MYC     |       |
| Mid-G1 phase                                                             | EGA1-1 | MYC   | MYC | MYC   |                |      |              | MYC     |       |
| Termination of cell cycle progression of fibroblasts                     | EGA1-1 | MYC   | MYC | MYC   |                |      |              | MYC     |       |
| Senescence of B-lymphoid cells                                           | EGA1-1 | MYC   | MYC | MYC   |                |      |              | MYC     |       |
| Killing of macrophage cancer cell lines                                  | EGA1-1 | MYC   | MYC | MYC   |                |      |              | MYC     |       |
| Accumulation of colonocytes                                              | EGA1-1 | MYC   | MYC | MYC   |                |      |              | MYC     |       |
| Cell cycle progression of brain cancer cell lines                        | EGA1-1 | MYC   | MYC | MYC   |                |      |              | MYC     |       |
| Size of brain cancer cell lines                                          | EGA1-1 | MYC   | MYC | MYC   |                |      |              | MYC     |       |
| Proliferation of lung cell lines                                         | EGA1-1 | MYC   | MYC | MYC   |                |      |              | MYC     |       |
| Resorption of bone                                                       | EGA1-1 | CXCR4 |     | CXCR4 | LDLR           |      |              | PRMT1   | LDLR  |
| Delay in initiation of differentiation of induced pluripotent stem cells | EGA1-1 | MYC   | MYC | MYC   |                |      |              | MYC     |       |
| Deletion of chromosomes                                                  | EGA1-1 | MYC   | MYC | MYC   |                |      |              | MYC     |       |
| Stimulation of embryonic cell lines                                      | EGA1-1 | MYC   | MYC | MYC   |                |      |              | MYC     |       |
| Synthesis of acetyl-coenzyme A                                           | EGA1-1 | MYC   | MYC | MYC   |                |      |              | MYC     |       |
| Size of lymphoma cell lines                                              | EGA1-1 | MYC   | MYC | MYC   |                |      |              | MYC     |       |
| Cell polarity formation of colorectal cancer cell lines                  | EGA1-1 | MYC   | MYC | MYC   |                |      |              | MYC     |       |
| Arrest in G1 phase of erythroblasts                                      | EGA1-1 | MYC   | MYC | MYC   |                |      |              | MYC     |       |
| Delay in cell cycle progression of epithelial cell lines                 | EGA1-1 | MYC   | MYC | MYC   |                |      |              | MYC     |       |
| Poly(ADP-ribosyl)ation of protein                                        | EGA1-1 | MYC   | MYC | MYC   |                |      |              | MYC     |       |
| Development of organ of Corti                                            | EGA1-1 | MYC   | MYC | MYC   |                |      |              | MYC     |       |
| Homing of inflammatory leukocytes                                        | EGA1-1 | MYC   | MYC | MYC   |                |      |              | MYC     |       |
| Differentiation of sebocytes                                             | EGA1-1 | MYC   | MYC | MYC   |                |      |              | MYC     |       |
| Self-renewal of cells                                                    | EGA1-1 | MYC   | MYC | MYC   |                |      |              | PCGF2   |       |
| Cell viability of colorectal cancer cell lines                           | EGA2-1 |       |     |       |                | ID2  | BAX          | DIS3    | INSR  |
| Hydrolysis of nucleotide                                                 | EGA2-1 |       |     |       | APAF1<br>TOP2A | EIF5 |              | ARFGAP1 | SIRT1 |
| Formation of ribosome                                                    | EGA2-1 |       |     |       | RPS14          | RPS6 |              | HMGB1   |       |
| Translation                                                              | EGA2-2 |       |     |       |                | RPS6 |              | LAS1L   |       |
| Cell death of pheochromocytoma cell lines                                | EGA2-1 |       |     |       | APAF1<br>RPS3  |      | BAX<br>GAPDH | HSPA5   | HSPA5 |
| Arrest in G2 phase of tumor cell lines                                   | EGA2-1 |       |     |       |                | RPS6 |              | RPS6    |       |
| Formation of ribosome                                                    | EGA2-2 |       |     |       | RPS10          | RPS6 |              | RPS6    |       |

|                                                |        |      |               |                                                 |                                   |                 |     |       |
|------------------------------------------------|--------|------|---------------|-------------------------------------------------|-----------------------------------|-----------------|-----|-------|
| Cell viability of endothelial cells            | EGA2-2 |      |               | GATA6<br>HSPA5                                  | GATA6                             | HSPA5           |     | HMOX1 |
| Reorganization of cytoskeleton                 | EGA2-2 | RPS6 |               | RPS6                                            |                                   |                 | DSP | RPS6  |
| Activation of hepatic stellate cells           | EGA3-1 |      | IL6           | IL6 LGALS3                                      | IL6 LEP                           | IL6             |     |       |
| Synthesis of purine nucleotide                 | EGA3-1 |      | IL6           | IL6 PINK1                                       | HSPD1 IL6                         | IL6             |     |       |
| Proliferation of multilineage progenitor cells | EGA3-1 |      | IL6           | IL6                                             | CFL1 IL6                          | IL6             |     |       |
| Autophagy                                      | EGA3-1 |      | IL6           | ACLY<br>CEBPB<br>GPR37 IL6<br>PINK1 SCD<br>XPO1 | IL6 SCD                           | ACLY IL6<br>SCD |     |       |
| Apoptosis of heart                             | EGA3-1 |      | IL6           | CAMK2D<br>HSPE1 IL6<br>SCD                      | HSPD1 IL6<br>LEP SCD              | IL6 SCD         |     |       |
| Apoptosis of leukocyte cell lines              | EGA3-1 |      | IL6           | CEBPB IL6<br>LGALS3                             | IL6<br>TNFRSF1A                   | IL6             |     |       |
| Maturation of dendritic cells                  | EGA3-1 |      | IL6           | ELF3 IL6                                        | HSPD1 IL6<br>TNFRSF1A             | IL6             |     |       |
| Apoptosis of hematopoietic cell lines          | EGA3-1 |      | IL6           | CEBPB IL6<br>LGALS3                             | IL6 LEP<br>TNFRSF1A               | IL6             |     |       |
| Synthesis of ATP                               | EGA3-1 |      | IL6           | IL6 PINK1                                       | HSPD1 IL6                         | IL6             |     |       |
| Oxidation of long chain fatty acid             | EGA3-1 |      | IL6           | ACOX1 IL6<br>SCD                                | ACSL4 IL6<br>LEP SCD              | IL6 SCD         |     |       |
| Osteoclastogenesis of leukocytes               | EGA3-1 |      | IL6           | IL6                                             | IL6<br>TNFRSF1A                   | IL6             |     |       |
| Quantity of germ cells                         | EGA3-1 |      | IL6           | GPR37 IL6<br>SHBG                               | IL6 LEP                           | IL6             |     |       |
| Cell death of hematopoietic cell lines         | EGA3-1 |      | IL6           | CEBPB IL6<br>LGALS3                             | IL6 LEP<br>TNFRSF1A               | IL6             |     |       |
| Concentration of corticosterone                | EGA3-1 |      | IL6           | IL6                                             | IL6 LEP<br>TNFRSF1A               | IL6             |     |       |
| Cell death of kidney cancer cell lines         | EGA3-1 |      | IL6           | IL6 SCD                                         | IL6 SCD                           | IL6 SCD         |     |       |
| Lipolysis of lipid                             | EGA3-1 |      | IL6           | IL6                                             | IL6 LEP                           | IL6             |     |       |
| Quantity of breast cancer cell lines           | EGA3-1 |      | IL6           | IL6<br>POU5F1                                   | IL6 LEP                           | IL6             |     |       |
| Generation of reactive oxygen species          | EGA3-1 |      | IL6           | IL6 LGALS3<br>PINK1                             | IL6 LEP                           | IL6             |     |       |
| Development of tumor cell lines                | EGA3-1 |      | IL6           | CEBPB<br>FLNA IL6                               | IL6                               | IL6             |     |       |
| Lipolysis                                      | EGA3-1 |      | IL6           | IL6                                             | IL6 LEP                           | IL6             |     |       |
| Cell death of myeloid cells                    | EGA3-1 |      | IL6           | CEBPB IL6<br>LGALS3                             | IL6 LEP<br>TNFRSF1A               | IL6             |     |       |
| Proliferation of antigen presenting cells      | EGA3-1 |      | IL6           | IL6 LGALS3                                      | IL6                               | IL6             |     |       |
| Quantity of anion                              | EGA3-1 |      | IL6           | IL6                                             | IL6 LEP<br>TNFRSF1A               | IL6             |     |       |
| Osteoclastogenesis                             | EGA3-1 |      | IL6           | FLNA IL6                                        | IL6<br>TNFRSF1A                   | IL6             |     |       |
| Apoptosis of granulocytes                      | EGA3-1 |      | IL6           | IL6                                             | IL6 LEP                           | IL6             |     |       |
| Concentration of glutathione                   | EGA3-1 |      | IL6           | IL6 LGALS3                                      | IL6 LEP                           | IL6             |     |       |
| Growth of organism                             | EGA3-1 |      | IL6<br>POU5F1 | ACOX1 IL6<br>POU5F1                             | CFL1 GRB10<br>IL6 LEP<br>TNFRSF1A | IL6             |     |       |
| Expansion of myeloid cells                     | EGA3-1 |      | IL6           | IL6                                             | IL6                               | IL6             |     |       |
| Apoptosis of myeloid cells                     | EGA3-1 |      | IL6           | CEBPB IL6<br>LGALS3                             | IL6 LEP<br>TNFRSF1A               | IL6             |     |       |

|                                                    |        |               |                  |                 |         |
|----------------------------------------------------|--------|---------------|------------------|-----------------|---------|
| Osteoclastogenesis of macrophages                  | EGA3-1 | IL6           | IL6              | IL6<br>TNFRSF1A | IL6     |
| Differentiation of adipocytes                      | EGA3-1 | IL6           | CEBPB IL6        | IL6 LEP         | IL6     |
| Adipogenesis of adipocytes                         | EGA3-1 | IL6           | CEBPB IL6<br>SCD | IL6 SCD         | IL6 SCD |
| Differentiation of B lymphoblastoid cell lines     | EGA3-1 | IL6           | IL6              | IL6             | IL6     |
| Function of gastrointestinal tract                 | EGA3-1 | IL6           | IL6              | IL6 LEP         | IL6     |
| Accumulation of anion                              | EGA3-1 | IL6           | IL6              | IL6<br>TNFRSF1A | IL6     |
| Thrombopoiesis                                     | EGA3-1 | IL6           | FLNA IL6         | IL6             | IL6     |
| Lipolysis of fatty acid                            | EGA3-1 | IL6           | IL6              | IL6             | IL6     |
| Expansion of myeloid progenitor cells              | EGA3-1 | IL6           | IL6              | IL6             | IL6     |
| Stimulation of synovial cells                      | EGA3-1 | IL6           | IL6              | IL6             | IL6     |
| Recovery of hematopoietic cells                    | EGA3-1 | IL6           | IL6              | IL6             | IL6     |
| Stimulation of steroid                             | EGA3-1 | IL6           | IL6              | IL6             | IL6     |
| Quantity of nitrite                                | EGA3-1 | IL6           | IL6              | IL6<br>TNFRSF1A | IL6     |
| Arrest in G1 phase of melanoma cell lines          | EGA3-1 | IL6           | IL6              | IL6             | IL6     |
| Cell-cell contact of synovial cells                | EGA3-1 | IL6           | IL6              | IL6             | IL6     |
| Invasion of intestinal cell lines                  | EGA3-1 | IL6           | IL6              | IL6             | IL6     |
| Function of gonad                                  | EGA3-1 | IL6           | CEBPB IL6        | IL6 LEP         | IL6     |
| Induction of CD4+ T-lymphocytes                    | EGA3-1 | IL6           | IL6              | IL6 LEP         | IL6     |
| Transduction of cells                              | EGA3-1 | IL6<br>POU5F1 | IL6<br>POU5F1    | IL6 LEP         | IL6     |
| Fragmentation of genomic DNA                       | EGA3-1 | IL6           | IL6              | IL6 LEP         | IL6     |
| Expansion of granulocytes                          | EGA3-1 | IL6           | IL6              | IL6             | IL6     |
| Angiogenesis of brain                              | EGA3-1 | IL6           | IL6              | IL6             | IL6     |
| Stimulation of hepatoma cell lines                 | EGA3-1 | IL6           | IL6              | IL6             | IL6     |
| Color of bile                                      | EGA3-1 | IL6           | IL6              | IL6             | IL6     |
| Activation of enteric neurons                      | EGA3-1 | IL6           | IL6              | IL6             | IL6     |
| Hydrolysis of fatty acid                           | EGA3-1 | IL6           | IL6              | IL6             | IL6     |
| Activation of adenohypophysis                      | EGA3-1 | IL6           | IL6              | IL6             | IL6     |
| Survival of hepatic stellate cells                 | EGA3-1 | IL6           | IL6              | IL6 LEP         | IL6     |
| Stimulation of prostaglandin                       | EGA3-1 | IL6           | IL6              | IL6 LEP         | IL6     |
| Binding of C/EBP binding site                      | EGA3-1 | IL6           | CEBPB IL6        | IL6             | IL6     |
| Activation-induced cell death of CD8+ T lymphocyte | EGA3-1 | IL6           | IL6              | IL6             | IL6     |
| Proliferation of microglia                         | EGA3-1 | IL6           | IL6 LGALS3       | IL6             | IL6     |
| Differentiation of Th22 cells                      | EGA3-1 | IL6           | IL6              | IL6             | IL6     |
| Fat body mass                                      | EGA3-1 | IL6           | IL6              | IL6 LEP         | IL6     |
| Morphology of trabecula                            | EGA3-1 | IL6           | IL6              | IL6             | IL6     |
| Ovulation of ovary                                 | EGA3-1 | IL6           | CEBPB IL6        | IL6 LEP         | IL6     |
| Development of peripheral blood leukocytes         | EGA3-1 | IL6           | IL6              | IL6             | IL6     |
| Downregulation of norepinephrine                   | EGA3-1 | IL6           | IL6              | IL6             | IL6     |
| Cellular infiltration by inflammatory monocytes    | EGA3-1 | IL6           | IL6              | IL6             | IL6     |

|                                                |        |       |              |     |                                |                     |          |
|------------------------------------------------|--------|-------|--------------|-----|--------------------------------|---------------------|----------|
| Proliferation of plasma cells                  | EGA3-1 |       |              | IL6 | IL6                            | IL6                 | IL6      |
| Turnover of bone                               | EGA3-1 |       |              | IL6 | IL6                            | IL6 LEP             | IL6      |
| Weakness of hindlimb                           | EGA3-1 |       |              | IL6 | IL6                            | IL6                 | IL6      |
| Regulation of regulatory T lymphocytes         | EGA3-1 |       |              | IL6 | IL6                            | IL6                 | IL6      |
| Migration of colon carcinoma cells             | EGA3-1 |       |              | IL6 | IL6                            | IL6                 | IL6      |
| Migration of tumor cells                       | EGA3-1 |       |              | IL6 | IL6 LGALS3                     | IL6 LEP             | IL6      |
| Hydrolysis of lipid                            | EGA3-1 |       |              | IL6 | IL6<br>MTMR4<br>CEBPB          | IL6 LEP<br>TNFRSF1A | IL6      |
| Autophagy of cells                             | EGA3-1 |       |              | IL6 | GPR37 IL6<br>PINK1 SCD<br>XPO1 | IL6 SCD             | IL6 SCD  |
| Release of carbohydrate                        | EGA3-1 |       |              | IL6 | IL6                            | IL6 LEP             | IL6      |
| Activation of brain                            | EGA3-1 |       |              | IL6 | IL6                            | IL6 LEP             | IL6      |
| Release of glycerol                            | EGA3-1 |       |              | IL6 | IL6                            | IL6 LEP             | IL6      |
| Fatty acid metabolism                          | EGA4-1 |       | BMP2         |     | APOA1<br>APP<br>FOXA1<br>IGF1  | DECR1 IGF1          | APP      |
| Quantity of neurites                           | EGA4-1 |       | BMP2         |     | SLC25A13<br>VTN                |                     |          |
| Cell viability of central nervous system cells | EGA4-1 | HSPB8 |              |     | APP IGF1                       | IGF1                | APP      |
| Cellular infiltration by leukocytes            | EGA4-1 | SPP1  | SPP1         |     | APP IGF1<br>PSAP<br>APOA1      | IGF1                | APP      |
| Limb development                               | EGA4-1 |       | BMP2         |     | APP SPP1                       |                     | APP SPP1 |
| Growth of limb                                 | EGA4-1 |       | BMP2         |     | TIMP3                          |                     |          |
| Fusion of vesicles                             | EGA4-1 | SPP1  | SPP1         |     | APP IGF1                       | GRN IGF1            | APP      |
| Cell viability of brain cells                  | EGA4-1 | HSPB8 |              |     | APP IGF1                       | GRN IGF1            | APP      |
| Cellular infiltration by blood cells           | EGA4-1 | SPP1  | SPP1         |     | APP SPP1                       | IGF1                | APP      |
| Quantity of filaments                          | EGA4-1 | SPP1  | SPP1         |     | APOA1<br>APP SPP1              |                     | APP SPP1 |
| Quantity of actin filaments                    | EGA4-1 | SPP1  | SPP1         |     | TIMP3<br>VTN                   |                     | APP SPP1 |
| Cellular infiltration                          | EGA4-1 | SPP1  | SPP1         |     | SPP1 VTN                       |                     | SPP1     |
| Binding of endothelial cells                   | EGA4-1 | SPP1  | SPP1         |     | APOA1<br>APP SPP1              |                     | APP SPP1 |
| Transport of metal                             | EGA4-1 |       | BMP2         |     | TIMP3                          |                     | APP SPP1 |
| Quantity of brain cells                        | EGA4-1 | HSPB8 |              |     | VTN                            |                     |          |
| Steroid metabolism                             | EGA4-1 |       | BMP2         |     | APP IGF1                       | IGF1                | APP      |
| Neurogenesis of hippocampus                    | EGA4-1 | HSPB8 |              |     | APP IGF1<br>PSAP               | IGF1                | APP      |
| Survival of osteoclasts                        | EGA4-1 | SPP1  | BMP2<br>SPP1 |     | APOA1<br>APP                   |                     |          |
| Morphology of cellular protrusions             | EGA4-1 |       | BMP2         |     | CYP51A1                        | CYP51A1<br>IGF1     | APP      |
| Morphology of neurons                          | EGA4-1 |       | BMP2         |     | FOXA1<br>HNF1B<br>IGF1         |                     |          |
|                                                |        |       |              |     | APP IGF1                       | IGF1                | APP      |
|                                                |        |       |              |     | SPP1                           |                     | SPP1     |
|                                                |        |       |              |     | APP                            |                     |          |
|                                                |        |       |              |     | FOXA1                          | GRN IGF1            | APP      |
|                                                |        |       |              |     | IGF1<br>APP                    |                     |          |
|                                                |        |       |              |     | FOXA1                          | GRN IGF1            | APP      |
|                                                |        |       |              |     | IGF1 PSAP                      |                     |          |

|                                                            |        |                |                       |                       |               |  |                           |      |          |
|------------------------------------------------------------|--------|----------------|-----------------------|-----------------------|---------------|--|---------------------------|------|----------|
| Attachment of connective tissue cells                      | EGA4-1 |                | SPP1                  |                       | BMP2<br>SPP1  |  | SPP1                      |      | SPP1     |
| Quantity of neuroblasts                                    | EGA4-1 |                | WNT7A                 |                       | WNT7A         |  | APP                       |      | APP      |
| Proliferation of cerebral cortex cells                     | EGA4-1 |                | WNT7A                 |                       | BMP2<br>WNT7A |  | IGF1                      | IGF1 |          |
| Damage of tumor cell lines                                 | EGA4-1 |                | SPP1                  |                       | SPP1          |  | APP SPP1                  |      | APP SPP1 |
| Proliferation of hippocampal cells                         | EGA4-1 |                | WNT7A                 |                       | WNT7A         |  | IGF1                      | IGF1 |          |
| Adhesion of smooth muscle cells                            | EGA4-1 |                | SPP1                  |                       | SPP1          |  | APP SPP1<br>VTN           |      | APP SPP1 |
| Calcification of cells                                     | EGA4-1 |                | SPP1                  |                       | BMP2<br>SPP1  |  | SPP1                      |      | SPP1     |
| Myelination of central nervous system                      | EGA1-1 | CXCR4          | MYC                   | CXCR4<br>MYC          | MYC           |  | MYC<br>PRMT1<br>SLC17A5   |      |          |
| Entry into cell cycle progression of fibroblast cell lines | EGA1-1 | CCND1          | CCND1<br>MYC          | CCND1<br>MYC          | CCND1<br>MYC  |  | CCND1<br>MYC              |      |          |
| Entry into S phase of epithelial cell lines                | EGA1-1 | CCND1          | CCND1<br>MYC          | CCND1<br>MYC          | CCND1<br>MYC  |  | CCND1<br>MYC              |      |          |
| Size of hepatocytes                                        | EGA1-1 | CCND1          | CCND1<br>MYC          | CCND1<br>MYC          | CCND1<br>MYC  |  | CCND1<br>MYC              |      |          |
| Cloning of cells                                           | EGA1-1 | CCND1          | CCND1<br>MYC          | CCND1<br>MYC          | CCND1<br>MYC  |  | CCND1<br>MYC              |      |          |
| G1 phase of fibroblast cell lines                          | EGA1-1 | CCND1          | CCNA1<br>CCND1<br>MYC | CCND1<br>MYC          | CCND1<br>MYC  |  | CCND1<br>CSNK2A1<br>MYC   |      |          |
| Apoptosis of squamous cell carcinoma cell lines            | EGA1-1 | CCND1          | CCND1<br>MYC          | CCND1<br>MYC          | CCND1<br>MYC  |  | CCND1<br>CSNK2A1<br>MYC   |      |          |
| Stimulation of fibroblast cell lines                       | EGA1-1 | CCND1          | CCND1<br>MYC          | CCND1<br>MYC          | CCND1<br>MYC  |  | CCND1<br>MYC              |      |          |
| Colony survival of tumor cell lines                        | EGA1-1 | CCND1          | CCND1                 | CCND1                 | CCND1         |  | CCND1<br>CSNK2A1          |      |          |
| Repair of cervical cancer cell lines                       | EGA1-1 | CCND1          | CCND1                 | CCND1                 | CCND1         |  | CCND1                     |      |          |
| G1 phase of kidney cell lines                              | EGA1-1 | CCND1          | CCND1<br>MYC          | CCND1<br>MYC          | CCND1<br>MYC  |  | CCND1<br>MYC              |      |          |
| Size of tumor cell lines                                   | EGA1-1 | CCND1          | CCND1<br>MYC          | CCND1<br>MYC          | CCND1<br>MYC  |  | CCND1<br>MYC              |      |          |
| Accumulation of tumor cell lines                           | EGA1-1 | CCND1          | CCND1                 | CCND1                 | CCND1         |  | CCND1                     |      |          |
| Cell survival of tumor cell lines                          | EGA1-1 | CCND1          | CCND1                 | CCND1                 | CCND1         |  | CCND1<br>CSNK2A1<br>PRMT1 |      |          |
| Proliferation of synovial fibroblasts                      | EGA1-1 | CCND1          | CCND1<br>MYC          | CCND1<br>MYC          | CCND1<br>MYC  |  | CCND1<br>MYC              |      |          |
| G1 phase of uterine cell lines                             | EGA1-1 | CCND1          | CCND1                 | CCND1                 | CCND1         |  | CCND1                     |      |          |
| Mitosis of Schwann cells                                   | EGA1-1 | CCND1          | CCND1                 | CCND1                 | CCND1         |  | CCND1                     |      |          |
| Entry into S phase of melanoma cell lines                  | EGA1-1 | CCND1          | CCND1                 | CCND1                 | CCND1         |  | CCND1                     |      |          |
| Proliferation of photoreceptors                            | EGA1-1 | CCND1          | CCND1                 | CCND1                 | CCND1         |  | CCND1                     |      |          |
| Delay in G1/S phase transition of chondrocytes             | EGA1-1 | CCND1          | CCND1                 | CCND1                 | CCND1         |  | CCND1                     |      |          |
| Maturation of lymphatic system cells                       | EGA1-1 | CCND1<br>CXCR4 | CCND1<br>MYC          | CCND1<br>CXCR4<br>MYC | CCND1<br>MYC  |  | CCND1<br>MYC              |      |          |
| Activation of mitochondria                                 | EGA1-1 | CCND1          | CCND1<br>MYC          | CCND1<br>MYC          | CCND1<br>MYC  |  | CCND1<br>MYC              |      |          |
| Arrest in G2/M phase transition                            | EGA1-1 | CCND1          | CCND1<br>MYC          | CCND1<br>MYC          | CCND1<br>MYC  |  | CCND1<br>MYC              |      |          |
| Entry into S phase of fibroblasts                          | EGA1-1 | CCND1          | CCND1<br>MYC          | CCND1<br>MYC          | CCND1<br>MYC  |  | CCND1<br>MYC              |      |          |

|                                                               |        |       |               |              |              |                       |
|---------------------------------------------------------------|--------|-------|---------------|--------------|--------------|-----------------------|
| Interphase of melanoma cell lines                             | EGA1-1 | CCND1 | CCND1<br>MYC  | CCND1<br>MYC | CCND1<br>MYC | CCND1<br>MYC          |
| Morphology of mitotic spindle                                 | EGA1-1 | CCND1 | CCND1<br>TPX2 | CCND1        | CCND1        | CCND1<br>TPX2         |
| Entry into S phase of fibroblast cell lines                   | EGA1-1 | CCND1 | CCND1<br>MYC  | CCND1<br>MYC | CCND1<br>MYC | CCND1<br>MYC          |
| DNA damage response of colorectal cancer cell lines           | EGA1-1 | CCND1 | CCND1         | CCND1        | CCND1        | CCND1                 |
| Reactivation of fibroblasts                                   | EGA1-1 | CCND1 | CCND1         | CCND1        | CCND1        | CCND1                 |
| Entry into S phase of intestinal cell lines                   | EGA1-1 | CCND1 | CCND1         | CCND1        | CCND1        | CCND1                 |
| Initiation of alveolization                                   | EGA1-1 | CCND1 | CCND1         | CCND1        | CCND1        | CCND1                 |
| Arrest in G0/G1 phase transition of endothelial cells         | EGA1-1 | CCND1 | CCND1         | CCND1        | CCND1        | CCND1                 |
| Accumulation of skin cancer cell lines                        | EGA1-1 | CCND1 | CCND1         | CCND1        | CCND1        | CCND1                 |
| Radioresistance of hepatoma cell lines                        | EGA1-1 | CCND1 | CCND1         | CCND1        | CCND1        | CCND1                 |
| Cloning of fibroblast cell lines                              | EGA1-1 | CCND1 | CCND1         | CCND1        | CCND1        | CCND1                 |
| Arrest in G0/G1 phase transition of rhabdoid cell lines       | EGA1-1 | CCND1 | CCND1         | CCND1        | CCND1        | CCND1                 |
| Radioresistance of cervical cancer cell lines                 | EGA1-1 | CCND1 | CCND1         | CCND1        | CCND1        | CCND1                 |
| Arrest in G1 phase of embryonic cell lines                    | EGA1-1 | CCND1 | CCND1<br>MYC  | CCND1<br>MYC | CCND1<br>MYC | CCND1<br>MYC          |
| Arrest in interphase of kidney cell lines                     | EGA1-1 | CCND1 | CCND1<br>MYC  | CCND1<br>MYC | CCND1<br>MYC | CCND1<br>MYC          |
| Mass of mitochondria                                          | EGA1-1 | CCND1 | CCND1<br>MYC  | CCND1<br>MYC | CCND1<br>MYC | CCND1<br>MYC          |
| G1 phase of fibroblasts                                       | EGA1-1 | CCND1 | CCND1<br>MYC  | CCND1<br>MYC | CCND1<br>MYC | CCND1<br>MYC          |
| Size of lymphatic system cells                                | EGA1-1 | CCND1 | CCND1<br>MYC  | CCND1<br>MYC | CCND1<br>MYC | CCND1<br>MYC          |
| Maturation of lymphocytes                                     | EGA1-1 | CXCR4 | MYC           | CXCR4<br>MYC | MYC          | MYC                   |
| Colony survival of lymphoma cell lines                        | EGA1-1 | CCND1 | CCND1         | CCND1        | CCND1        | CCND1                 |
| Homologous recombination repair of cervical cancer cell lines | EGA1-1 | CCND1 | CCND1         | CCND1        | CCND1        | CCND1                 |
| Arrest in cell cycle progression of hepatocytes               | EGA1-1 | CCND1 | CCND1         | CCND1        | CCND1        | CCND1                 |
| Outgrowth of ovarian cancer cell lines                        | EGA1-1 | CCND1 | CCND1         | CCND1        | CCND1        | CCND1                 |
| Cell cycle progression of skeletal muscle satellite cells     | EGA1-1 | CCND1 | CCND1         | CCND1        | CCND1        | CCND1                 |
| Initiation of S phase                                         | EGA1-1 | CCND1 | CCND1<br>MYC  | CCND1<br>MYC | CCND1<br>MYC | CCND1<br>MYC          |
| Expansion of hematopoietic progenitor cells                   | EGA1-1 | CCND1 | CCND1<br>MYC  | CCND1<br>MYC | CCND1<br>MYC | CCND1<br>MYC<br>PCGF2 |
| Meiotic nondisjunction                                        | EGA1-1 | CCND1 | CCND1<br>MYC  | CCND1<br>MYC | CCND1<br>MYC | CCND1<br>MYC          |



|                                            |        |       |                        |                |       |              |                                                                                             |                            |  |              |
|--------------------------------------------|--------|-------|------------------------|----------------|-------|--------------|---------------------------------------------------------------------------------------------|----------------------------|--|--------------|
| G2/M phase                                 | EGA2-1 |       | EP300                  | RPS6           |       |              | HLA-G<br>LATS1<br>NFYA<br>NPM1<br>PPP5C<br>PTPN11<br>RAD17<br>RASSF1<br>RPS6 SGK1<br>UBQLN2 | RPL7A                      |  | RPS6         |
| Cell viability of breast cancer cell lines | EGA2-1 | YBX1  | EP300                  |                | ID2   |              | DPH5 PLD2<br>RRM1<br>YBX1                                                                   | RRM1 YBX1                  |  |              |
| Synthesis of protein                       | EGA2-2 |       | RPS10                  | RPS6           |       |              | HSPA5<br>RPS20<br>RPS6<br>CHCHD2<br>HNF4A                                                   | HSPA5                      |  | RPS6<br>RPS7 |
| Differentiation of embryonic tissue        | EGA2-1 |       | RARG                   |                | ID2   | BAX          | PTPN11<br>RARG<br>ROCK1<br>SGK1                                                             | TFAP2C                     |  |              |
| Cell death of colorectal cancer cell lines | EGA2-1 | DTYMK | APAF1<br>EP300         |                |       | BAX          | SMC1A<br>TXNRD1<br>GAPDH<br>HMGB1<br>PTPN11                                                 | SIRT1                      |  |              |
| Cell proliferation of carcinoma cell lines | EGA2-1 |       | APAF1<br>EP300<br>RARG |                | PDGFA | BAX<br>GAPDH | RARG<br>RASSF1<br>SMC1A<br>TIA1<br>GAPDH<br>HMGB1                                           | GAPDH                      |  |              |
| Cell death of central nervous system cells | EGA2-1 |       | APAF1<br>EP300<br>RPS3 | CDK6           |       | BAX<br>GAPDH | NMNAT2<br>NPM1<br>ROCK1<br>SGK1<br>CUL2<br>DDX41                                            | GAPDH<br>SIRT1             |  |              |
| Cell death of melanoma cell lines          | EGA2-1 | YBX1  |                        | RPL27A<br>TUFM |       | BAX          | EMG1<br>PPP1R10<br>RASSF1<br>YBX1<br>HLA-G<br>LATS1<br>NFYA                                 | YBX1                       |  |              |
| G2 phase of tumor cell lines               | EGA2-1 |       |                        | RPS6           |       | BAX          | NPM1<br>RAD17<br>RASSF1<br>RPS6 SGK1                                                        | RPL7A                      |  | RPS6         |
| Size of dendritic trees                    | EGA2-1 |       | RPS14                  | RPS6           |       | BAX          | RPS6<br>ACIN1<br>ARHGAP11                                                                   |                            |  | RPS6         |
| Arrest in G1 phase                         | EGA2-1 |       | EP300                  | RPS6           |       |              | A LAS1L<br>NFYA<br>RAD17<br>RASSF1<br>RPS6 TFRC<br>ACIN1<br>ARHGAP11                        | PPARGC1B<br>RPL7A<br>SIRT1 |  | RPS6         |
| Arrest in G1 phase of tumor cell lines     | EGA2-1 |       | EP300                  | RPS6           |       |              | A LAS1L<br>NFYA<br>RAD17<br>RASSF1<br>RPS6 TFRC                                             | RPL7A                      |  | RPS6         |

|                                                 |        |               |               |                |      |     |     |  |  |                                                                                                                                                                                                                                                                                                                                                                                          |                                      |         |  |          |      |
|-------------------------------------------------|--------|---------------|---------------|----------------|------|-----|-----|--|--|------------------------------------------------------------------------------------------------------------------------------------------------------------------------------------------------------------------------------------------------------------------------------------------------------------------------------------------------------------------------------------------|--------------------------------------|---------|--|----------|------|
| Arrest in interphase of tumor cell lines        | EGA2-1 |               |               | EP300          | RPS6 |     |     |  |  | ACIN1<br>ARHGAP11<br>A CYP1B1<br>HLA-G<br>LAS1L<br>LATS1<br>NFYA<br>RAD17<br>RASSF1<br>RPS6 SGK1<br>TFRC<br>RASSF1<br>RPS6<br>E2F5 HLA-G<br>LATS1<br>NFYA<br>PTPN11<br>RAD17<br>RASSF1<br>RPS6 SGK1<br>UBQLN2<br>ACIN1<br>ARHGAP11<br>A CYP1B1<br>DYRK1B<br>E2F5 HLA-G<br>LAS1L<br>LATS1<br>NFYA<br>PTPN11<br>RAD17<br>RASSF1<br>RPS6 SGK1<br>SMC1A<br>TFRC<br>UBQLN2<br>IL6 SCD<br>SHBG | CYP1B1<br>RPL7A                      |         |  |          | RPS6 |
| Arrest in G1 phase of lung cancer cell lines    | EGA2-1 |               |               | EP300          | RPS6 |     |     |  |  | RASSF1<br>RPS6<br>E2F5 HLA-G<br>LATS1<br>NFYA<br>PTPN11<br>RAD17<br>RASSF1<br>RPS6 SGK1<br>UBQLN2<br>ACIN1<br>ARHGAP11<br>A CYP1B1<br>DYRK1B<br>E2F5 HLA-G<br>LAS1L<br>LATS1<br>NFYA<br>PTPN11<br>RAD17<br>RASSF1<br>RPS6 SGK1<br>SMC1A<br>TFRC<br>UBQLN2<br>IL6 SCD<br>SHBG                                                                                                             | RPL7A                                |         |  |          | RPS6 |
| Arrest in G2 phase                              | EGA2-1 |               |               | TOP2A          | RPS6 |     |     |  |  | PTPN11<br>RAD17<br>RASSF1<br>RPS6 SGK1<br>UBQLN2<br>ACIN1<br>ARHGAP11<br>A CYP1B1<br>DYRK1B<br>E2F5 HLA-G<br>LAS1L<br>LATS1<br>NFYA<br>PTPN11<br>RAD17<br>RASSF1<br>RPS6 SGK1<br>SMC1A<br>TFRC<br>UBQLN2<br>IL6 SCD<br>SHBG                                                                                                                                                              | RPL7A                                |         |  |          | RPS6 |
| Arrest in interphase                            | EGA2-1 |               |               | EP300<br>TOP2A | RPS6 |     |     |  |  | LATS1<br>NFYA<br>PTPN11<br>RAD17<br>RASSF1<br>RPS6 SGK1<br>SMC1A<br>TFRC<br>UBQLN2<br>IL6 SCD<br>SHBG                                                                                                                                                                                                                                                                                    | CYP1B1<br>PPARGC1B<br>RPL7A<br>SIRT1 |         |  |          | RPS6 |
| Transport of steroid                            | EGA3-1 |               |               |                |      | MSN | IL6 |  |  | IL6 SCD<br>SHBG                                                                                                                                                                                                                                                                                                                                                                          | IL6 LEP SCD                          | IL6 SCD |  |          |      |
| Orientation of cells                            | EGA3-1 |               |               |                |      | MSN | IL6 |  |  | IL6                                                                                                                                                                                                                                                                                                                                                                                      | CFL1<br>IL6<br>LEP                   | IL6     |  |          |      |
| Metabolism of carbohydrate                      | EGA4-1 | SPP1          | BMP2<br>SPP1  |                |      |     |     |  |  | APOA1<br>APP<br>DUSP6<br>IGF1<br>SLC37A4<br>SPP1<br>TCF7L2                                                                                                                                                                                                                                                                                                                               | IGF1                                 |         |  | APP SPP1 |      |
| Synthesis of carbohydrate                       | EGA4-1 | SPP1          | BMP2<br>SPP1  |                |      |     |     |  |  | APOA1<br>DUSP6<br>IGF1<br>SLC37A4<br>SPP1<br>TCF7L2                                                                                                                                                                                                                                                                                                                                      | IGF1                                 |         |  | SPP1     |      |
| Activation of blood cells                       | EGA4-1 | HSPB8<br>SPP1 | SPP1          |                |      |     |     |  |  | APOA1<br>APP<br>IGF1<br>SPP1<br>VTN                                                                                                                                                                                                                                                                                                                                                      | GRN<br>IGF1                          |         |  | APP SPP1 |      |
| Differentiation of central nervous system cells | EGA4-1 | WNT7A         | BMP2<br>WNT7A |                |      |     |     |  |  | APP<br>IGF1<br>VTN                                                                                                                                                                                                                                                                                                                                                                       | IGF1                                 |         |  | APP      |      |
| Cell movement of hepatoma cell lines            | EGA4-1 | SPP1          | SPP1          |                |      |     |     |  |  | IGF1<br>SPP1<br>TCF7L2                                                                                                                                                                                                                                                                                                                                                                   | IGF1                                 |         |  | SPP1     |      |
| Activation of myeloid cells                     | EGA4-1 | SPP1          | SPP1          |                |      |     |     |  |  | APP<br>IGF1<br>SPP1<br>VTN                                                                                                                                                                                                                                                                                                                                                               | GRN<br>IGF1                          |         |  | APP SPP1 |      |

|                                              |        |                        |               |                                                        |                |          |
|----------------------------------------------|--------|------------------------|---------------|--------------------------------------------------------|----------------|----------|
| Stimulation of cells                         | EGA4-1 | SPP1                   | BMP2<br>SPP1  | APOA1<br>APP HNF1B<br>IGF1 PSAP<br>SPP1                | IGF1           | APP SPP1 |
| Differentiation of brain cells               | EGA4-1 | WNT7A                  | BMP2<br>WNT7A | APP IGF1<br>VTN                                        | IGF1           | APP      |
| Release of metal                             | EGA4-1 | SPP1                   | BMP2<br>SPP1  | APP IGF1<br>SPP1                                       | IGF1           | APP SPP1 |
| Quantity of bone cells                       | EGA4-1 | SPP1                   | SPP1          | IGF1 SPP1                                              | IGF1           | SPP1     |
| Cell movement of leukocytes                  | EGA4-1 | SPP1                   | SPP1          | APOA1<br>APP SPP1<br>TIMP3<br>VTN<br>APOA1<br>APP IGF1 | GRN            | APP SPP1 |
| Cell movement of blood cells                 | EGA4-1 | SPP1                   | BMP2<br>SPP1  | SPP1<br>TIMP3<br>VTN<br>IGF1 SPP1                      | GRN IGF1       | APP SPP1 |
| Cell movement of endothelial cells           | EGA4-1 | SPP1                   | BMP2<br>SPP1  | TIMP3<br>VTN                                           | GRN IGF1       | SPP1     |
| Quantity of lymphocytes                      | EGA4-1 | SPP1                   | PSMB9<br>SPP1 | APOA1<br>APP IGF1<br>PSAP SPP1                         | IGF1           | APP SPP1 |
| Quantity of connective tissue cells          | EGA4-1 | SPP1                   | SPP1          | IGF1 SPP1                                              | IGF1           | SPP1     |
| Phosphorylation of protein                   | EGA4-1 | SPP1                   | SPP1          | APOA1<br>APP IGF1<br>PSAP SPP1                         | IGF1           | APP SPP1 |
| Quantity of lymphatic system cells           | EGA4-1 | SPP1                   | PSMB9<br>SPP1 | APOA1<br>APP IGF1<br>PSAP SPP1                         | IGF1           | APP SPP1 |
| Chemotaxis of myeloid cells                  | EGA4-1 | SPP1                   | SPP1          | APOA1<br>APP SPP1<br>VTN                               | GRN            | APP SPP1 |
| Tyrosine phosphorylation of protein          | EGA4-1 | SPP1                   | SPP1          | APP IGF1<br>PSAP SPP1                                  | IGF1           | APP SPP1 |
| Cell movement of myeloid cells               | EGA4-1 | SPP1                   | SPP1          | APOA1<br>APP SPP1<br>TIMP3<br>VTN                      | GRN            | APP SPP1 |
| Cell viability of connective tissue cells    | EGA4-1 | PDCCD4<br>SPP1         | BMP2<br>SPP1  | APP IGF1<br>PDCCD4<br>SPP1                             | IGF1<br>PDCCD4 | APP SPP1 |
| Quantity of mononuclear leukocytes           | EGA4-1 | SPP1                   | PSMB9<br>SPP1 | APOA1<br>APP IGF1<br>PSAP SPP1                         | IGF1           | APP SPP1 |
| Binding of fibroblast cell lines             | EGA4-1 | SPP1                   | SPP1          | IGF1 SPP1                                              | IGF1           | SPP1     |
| Cell movement of epithelial cell lines       | EGA4-1 | SPP1                   | SPP1          | APOA1<br>APP IGF1<br>SPP1 VTN                          | IGF1           | APP SPP1 |
| Quantity of antigen presenting cells         | EGA4-1 | SPP1                   | SPP1          | APP IGF1<br>SPP1                                       | IGF1           | APP SPP1 |
| Colony formation of breast cancer cell lines | EGA4-1 | SPP1                   | SPP1          | DUSP6<br>SPP1                                          | GRN            | SPP1     |
| Proliferation of brain cells                 | EGA4-1 | WNT7A                  | BMP2<br>WNT7A | APP IGF1<br>VTN                                        | IGF1           | APP      |
| Morphology of muscle                         | EGA4-1 | HSPB8<br>SPP1<br>WNT7A | SPP1<br>WNT7A | APP IGF1<br>SPP1                                       | GRN IGF1       | APP SPP1 |
| Mass of skeletal muscle                      | EGA4-1 | SPP1                   | SPP1          | IGF1 SPP1                                              | IGF1           | SPP1     |

|                                     |        |                        |               |               |                                |           |                                                                                |                                                                                       |                          |      |
|-------------------------------------|--------|------------------------|---------------|---------------|--------------------------------|-----------|--------------------------------------------------------------------------------|---------------------------------------------------------------------------------------|--------------------------|------|
| Morphology of vessel                | EGA4-1 | SPP1                   | SPP1          |               |                                |           | APP HNF1B<br>IGF1 SPP1<br>VTN                                                  | IGF1                                                                                  | APP SPP1                 |      |
| Migration of multiple myeloma cells | EGA4-1 | SPP1                   | SPP1          |               |                                |           | IGF1 SPP1                                                                      | IGF1                                                                                  | SPP1                     |      |
| Morphology of bone                  | EGA4-1 | SPP1                   | BMP2<br>SPP1  |               |                                |           | APP IGF1<br>SPP1                                                               | IGF1                                                                                  | APP SPP1                 |      |
| Morphology of blood vessel          | EGA4-1 | SPP1                   | SPP1          |               |                                |           | APP IGF1<br>SPP1 VTN                                                           | IGF1                                                                                  | APP SPP1                 |      |
| Diameter of cells                   | EGA4-1 | SPP1                   | SPP1          |               |                                |           | IGF1 SPP1                                                                      | IGF1                                                                                  | SPP1                     |      |
| Size of bone                        | EGA4-1 | SPP1                   | BMP2<br>SPP1  |               |                                |           | APP IGF1<br>SPP1                                                               | IGF1                                                                                  | APP SPP1                 |      |
| Mass of extensor muscle             | EGA4-1 | SPP1                   | SPP1          |               |                                |           | IGF1 SPP1                                                                      | IGF1                                                                                  | SPP1                     |      |
| Diameter of myofiber                | EGA4-1 | SPP1                   | SPP1          |               |                                |           | IGF1 SPP1                                                                      | IGF1                                                                                  | SPP1                     |      |
| Activation of osteoblasts           | EGA4-1 | SPP1                   | BMP2<br>SPP1  |               |                                |           | IGF1 SPP1                                                                      | IGF1                                                                                  | SPP1                     |      |
| Movement of endocrine cell lines    | EGA4-1 | SPP1                   | SPP1          |               |                                |           | IGF1 SPP1                                                                      | IGF1                                                                                  | SPP1                     |      |
| Healing of epithelial tissue        | EGA4-1 | SPP1                   | SPP1          |               |                                |           | SPP1                                                                           | GRN                                                                                   | SPP1                     |      |
| Binding of fibroblasts              | EGA4-1 | SPP1                   | SPP1          |               |                                |           | IGF1 SPP1                                                                      | IGF1                                                                                  | SPP1                     |      |
| Morphology of muscle cells          | EGA4-1 | HSPB8<br>SPP1<br>WNT7A | SPP1<br>WNT7A |               |                                |           | APP IGF1<br>SPP1                                                               | GRN IGF1                                                                              | APP SPP1                 |      |
| Cell viability of muscle cells      | EGA4-1 | HSPB8                  | BMP2          |               |                                |           | APP IGF1                                                                       | IGF1                                                                                  | APP                      |      |
| Length of muscle cells              | EGA4-1 | SPP1                   | SPP1          |               |                                |           | IGF1 SPP1                                                                      | IGF1                                                                                  | SPP1                     |      |
| Morphology of skeletal muscle       | EGA4-1 | SPP1                   | SPP1          |               |                                |           | IGF1 SPP1                                                                      | IGF1                                                                                  | SPP1                     |      |
| G1 phase of tumor cell lines        | EGA2-1 |                        |               | EP300         | CDK6<br>RPS6                   | BAX       | ACIN1<br>ARHGAP11<br>A DYRK1B<br>LAS1L<br>NFYA<br>RAD17<br>RASSF1<br>RPS6 TFRC | INSR RPL7A                                                                            | RPS6                     |      |
| Cell death of sarcoma cell lines    | EGA2-1 |                        |               | YBX1          | HAT1<br>RRP1B<br>TOP2A         | CDK6      | BAX                                                                            | PPP5C<br>YBX1                                                                         | YBX1                     |      |
| Synthesis of protein                | EGA2-1 |                        |               | H2AFZ<br>YBX1 | EIF3H<br>RPS14<br>RPS3<br>RPS9 | EIF5 RPS6 | HNRNPK                                                                         | ALDH3A1<br>EIF4G1<br>EIF5<br>METAP2<br>MKRN1<br>NPM1<br>PTPN11<br>RASSF1<br>RPS6 YBX1 | INSR<br>PPARGC1B<br>YBX1 | RPS6 |
| Translation                         | EGA2-1 |                        |               | YBX1          | RPS3<br>RPS9                   | RPS6      | HNRNPK                                                                         | EIF4G1<br>RPS6 YBX1                                                                   | YBX1                     | RPS6 |
