# Supplementary material
Source: PubMed Central journal article supplement (PMC6417155)
Supplement: gaz001_schall_et_al._table_s36.pdf [file gaz001_schall_et_al._table_s36.pdf]

Table S36 - IPA EGA4 upstream regulators targets in affected sub-group biological functions

| Function                                       | Sub-Group | Upstream Regulators                                                                      |      |       |                                            |               |
|------------------------------------------------|-----------|------------------------------------------------------------------------------------------|------|-------|--------------------------------------------|---------------|
|                                                |           | ERBB2                                                                                    | ELF3 | ACOX1 | TCF7L2                                     | FN1           |
| Proliferation of neuronal cells                | M-1       | AKT1, E2F1, EGR1, ESR2, ETV5, IGF1R, JAG1, MAP1B, PFN2, PSEN1, SMAD2, THBS1              |      |       | BMP4, JAG1, NINJ2, SEMA4D, SLC12A2         |               |
| Development of neurons                         | M-1       | AKT1, CHRNE, CTNNB1, EGR1, HSPB1, MAP1B, PFN2, PSEN1, SMAD3, THBS1                       |      |       | BMP4, DOCK10, HIPK2, MEN1, SEMA4D, SLC12A2 |               |
| Development of body axis                       | M-1       | AKT1, ALOX15, CDCA7L, CDON, CTNNB1, EGR1, IGF1R, ITGA5, JAG1, MAP1B, PSEN1, SMAD2, THBS1 |      |       | BMP4, JAG1, YAP1                           |               |
| Formation of plasma membrane                   | M-1       | CHRNE, CSF1R, CTNNB1, THBS1                                                              |      |       | HIPK2, MEN1, SEMA4D, SLC12A2               |               |
| Dendritic growth/branching                     | M-1       | AKT1, CTNNB1, PFN2, PSEN1                                                                |      |       | DOCK10, SEMA4D                             |               |
| Ubiquitination                                 | M-1       | CUL1                                                                                     |      |       |                                            | UBE2H         |
| Shape change of neurites                       | M-1       | AKT1, CTNNB1, MAP1B, PFN2, PSEN1                                                         |      |       | DOCK10, SEMA4D                             |               |
| Cognition                                      | M-1       | AKT1, EGR1, ESR2, PSEN1                                                                  |      |       | TP63                                       |               |
| Assembly of intercellular junctions            | M-1       | CHRNE, CTNNB1, THBS1                                                                     |      |       | HIPK2, MEN1, SEMA4D, SLC12A2               |               |
| Development of gap junctions                   | M-1       | CHRNE, CTNNB1, THBS1                                                                     |      |       | HIPK2, MEN1, SEMA4D, SLC12A2               |               |
| Shape change of neurons                        | M-1       | AKT1, CTNNB1, MAP1B, PFN2, PSEN1                                                         |      |       | DOCK10, SEMA4D                             |               |
| Developmental process of synapse               | M-1       | CHRNE, CTNNB1, THBS1                                                                     |      |       | HIPK2, MEN1, SEMA4D, SLC12A2               |               |
| Formation of intercellular junctions           | M-1       | CHRNE, CSF1R, CTNNB1, THBS1                                                              |      |       | HIPK2, MEN1, SEMA4D, SLC12A2               |               |
| Cytostasis                                     | M-1       | CCND3, CDCA8, CRADD, CTNNB1, CUL1, EGR1, HAS2, IGF1R, JAG1, SMAD2, SMAD3, ZEB1           |      |       | BMP4, JAG1, TP63, YAP1                     |               |
| Formation of cell-cell contacts                | M-1       | CHRNE, CSF1R, CTNNB1, THBS1                                                              |      |       | HIPK2, MEN1, SEMA4D, SLC12A2               |               |
| Migration of neurons                           | M-1       | CTNNB1, IGF1R, MAP1B, PSEN1                                                              |      |       | BMP4, NDE1, SEMA4D, SLC12A2                |               |
| Proliferation of lymphatic system cells        | M-2       |                                                                                          |      |       |                                            |               |
| Phosphorylation of L-amino acid                | M-1       | AKT1, IGF1R                                                                              |      |       | SRPK1                                      |               |
| Migration of smooth muscle cells               | M-2       |                                                                                          |      |       |                                            |               |
| Formation of brain                             | M-1       | CDCA7L, CTNNB1, EGR1, MAP1B, PSEN1, THBS1                                                |      |       | YAP1                                       |               |
| Growth of dendrites                            | M-1       | AKT1                                                                                     |      |       | SEMA4D                                     |               |
| Proliferation of immune cells                  | M-2       |                                                                                          |      |       |                                            |               |
| Proliferation of lymphocytes                   | M-2       |                                                                                          |      |       |                                            |               |
| Phosphorylation of L-serine                    | M-1       | AKT1                                                                                     |      |       | SRPK1                                      |               |
| Adhesion of vascular endothelial cells         | M-3       | CD36, TGFBI                                                                              |      |       |                                            | ITGA4, LGALS8 |
| Cytostasis of tumor cell lines                 | M-1       | CCND3, CDCA8, CTNNB1, EGR1, IGF1R, JAG1, SMAD2, SMAD3                                    |      |       | BMP4, JAG1, TP63                           |               |
| Long term depression of hippocampal CA1 region | M-1       |                                                                                          |      |       |                                            |               |
| Differentiation of vasculature                 | M-1       | JAG1                                                                                     |      |       | BMP4, JAG1                                 |               |
| Cell proliferation of T lymphocytes            | M-2       |                                                                                          |      |       |                                            |               |
| Formation of chromosome components             | M-1       | SYCP3                                                                                    |      |       |                                            |               |
| Accumulation of phosphoinositide               | M-1       |                                                                                          |      |       |                                            |               |
| NK cell development                            | M-2       |                                                                                          |      |       |                                            |               |

|                                                |     |                                                                                               |                          |               |
|------------------------------------------------|-----|-----------------------------------------------------------------------------------------------|--------------------------|---------------|
| Interaction of tumor cell lines                | M-1 | AKT1, ALOX15, ANXA2, CTNNB1, E2F1, EGR1, ETV5, HAS2, IGF1R, IGFBP3, ITGA5, SMAD3, THBS1, ZEB1 | PARVB, PI4KB, TP63, YAP1 |               |
| Formation of actin filaments                   | M-2 |                                                                                               |                          |               |
| Production of lymphocytes                      | M-2 |                                                                                               |                          |               |
| Interaction of tumor cell lines                | M-3 | ADAM12, CD36, PRL, VCAN                                                                       |                          | ITGA4, LGALS8 |
| Differentiation of carcinoma cell lines        | M-1 | AKT1, EGR1                                                                                    | TP63                     |               |
| Differentiation of mesenchymal cells           | M-1 | CTNNB1, SMAD3, THBS1                                                                          | BMP4, MEN1               |               |
| Remodeling of cytoskeleton                     | M-1 | AKT1, CSF1R                                                                                   |                          |               |
| Cell movement of dermal cells                  | M-2 |                                                                                               |                          |               |
| Maturation of lung                             | M-1 |                                                                                               | NCOR2                    |               |
| Function of intercellular junctions            | M-1 | PSEN1                                                                                         | MTMR2                    |               |
| Long term depression of CA1 neuron             | M-1 |                                                                                               |                          |               |
| Chemotaxis of fibroblasts                      | M-2 |                                                                                               |                          |               |
| Quantity of vesicles                           | M-1 | EGR1                                                                                          | HIPK2, SYTL2             |               |
| Formation of centriole                         | M-1 | CUL1                                                                                          |                          |               |
| Secretion of mucus                             | M-2 |                                                                                               |                          |               |
| Density of neurons                             | M-1 | PSEN1                                                                                         | DOCK10, MTMR2, SEMA4D    |               |
| Quantity of dendritic spines                   | M-1 | PFN2                                                                                          |                          |               |
| Maturation of cells                            | M-3 | CD36, PRL                                                                                     |                          |               |
| Synthesis of eicosanoid                        | M-2 |                                                                                               |                          |               |
| Quantity of endocrine cells                    | M-1 | AKT1, CCND3, CSF1R, CTNNB1, E2F1, IGF1R                                                       | MEN1                     |               |
| Accumulation of phospholipid                   | M-1 |                                                                                               |                          |               |
| Concentration of acylglycerol                  | M-2 |                                                                                               |                          |               |
| Formation of actin filaments                   | M-1 | AKT1, JAG1, TPM1                                                                              | BMP4, JAG1, SEMA4D, TP63 |               |
| Differentiation of mesenchymal stem cells      | M-1 | CTNNB1, SMAD3, THBS1                                                                          | BMP4                     |               |
| Differentiation of germ cell tumor cell lines  | M-1 | AKT1, EGR1                                                                                    | TP63                     |               |
| Cell movement of keratinocytes                 | M-2 |                                                                                               |                          |               |
| Remodeling of actin cytoskeleton               | M-1 | AKT1                                                                                          |                          |               |
| Analgesia                                      | M-2 |                                                                                               |                          |               |
| Adhesion of vascular endothelial cells         | M-2 |                                                                                               |                          |               |
| Migration of central nervous system cells      | M-1 | IGF1R                                                                                         | BMP4, NDE1, SLC12A2      |               |
| Invasion of squamous cell carcinoma cell lines | M-2 |                                                                                               |                          |               |
| Contact growth inhibition                      | M-1 | CCND3, CTNNB1, EGR1, HAS2, IGF1R, SMAD2, SMAD3, ZEB1                                          | BMP4, YAP1               |               |
| NK cell proliferation                          | M-2 |                                                                                               |                          |               |
| Cell movement of fibroblasts                   | M-1 | AKT1, CTNNB1, SMAD3, THBS1                                                                    | ENPP2                    |               |
| Cell cycle progression of tumor cell lines     | M-1 | AKT1, AREG, CCND3, E2F1, EGR1, IGF1R, IGFBP3, PSEN1, SMAD3, SPDEF, ZEB1                       | BMP4, TP63, YAP1         |               |
| Adhesion of breast cancer cell lines           | M-1 | IGF1R, THBS1, ZEB1                                                                            | PARVB, PI4KB             |               |
| Recombination                                  | M-1 | AKT1, CHD4, RPA2, SYCP3                                                                       | NDE1                     |               |
| Quantity of interneurons                       | M-1 | ESR2                                                                                          |                          |               |
| Migration of brain cells                       | M-1 | IGF1R                                                                                         | BMP4, NDE1, SLC12A2      |               |
| Proliferation of lymphatic system cells        | M-3 | CD36, MYBL1, PRL                                                                              |                          |               |
| Contact growth inhibition of tumor cell lines  | M-1 | CCND3, CTNNB1, EGR1, IGF1R, SMAD2, SMAD3                                                      | BMP4                     |               |
| Apoptosis of synovial cells                    | M-2 |                                                                                               |                          |               |
| Development of neurons                         | M-3 |                                                                                               |                          |               |
| Synthesis of prostaglandin                     | M-2 |                                                                                               |                          |               |
| Cell death of germ cells                       | M-1 | EGR1, IGFBP3                                                                                  | SLC12A2                  |               |
| Cell death of lymphoma cell lines              | M-2 |                                                                                               |                          |               |
| Pathfinding                                    | M-1 |                                                                                               |                          |               |
| Pathfinding of neurons                         | M-1 |                                                                                               |                          |               |



|                                                     |     |                                                       |                     |
|-----------------------------------------------------|-----|-------------------------------------------------------|---------------------|
| Movement of vascular endothelial cells              | M-3 | CD36, TGFBI                                           |                     |
| Binding of carcinoma cell lines                     | M-1 | AKT1, ITGA5, THBS1, ZEB1                              | TP63                |
| Relaxation of muscle                                | M-1 | CDON, THBS1, TPM1                                     |                     |
| Remodeling of blood vessel                          | M-1 |                                                       |                     |
| Quantity of granulocytes                            | M-3 | CD36, PRL                                             |                     |
| Cell-cell adhesion                                  | M-1 | ALOX15, CTNNB1, PSEN1, ZEB1                           | PI4KB, TP63         |
| Disruption of actin cytoskeleton                    | M-1 | IGF1R                                                 |                     |
| Adhesion of squamous cell carcinoma cell lines      | M-1 | AKT1, ITGA5, THBS1, ZEB1                              | TP63                |
| Concentration of choline-phospholipid               | M-2 |                                                       |                     |
| Cell proliferation of T lymphocytes                 | M-3 | CD36, PRL                                             |                     |
| Secretion of steroid hormone                        | M-2 |                                                       |                     |
| Quantity of pulmonary alveolus                      | M-1 | ESR2                                                  |                     |
| Apoptosis of hepatoma cell lines                    | M-2 |                                                       |                     |
| Anxiety                                             | M-3 | FGF9                                                  |                     |
| Binding of lymphocytes                              | M-2 |                                                       |                     |
| Cell-cell contact of breast cancer cell lines       | M-1 | ZEB1                                                  | PI4KB               |
| Cytostasis of carcinoma cell lines                  | M-2 |                                                       |                     |
| Proliferation of prostate cancer cell lines         | M-3 | PRL                                                   |                     |
| Cell-cell adhesion of carcinoma cell lines          | M-1 | ZEB1                                                  | TP63                |
| Response of fibroblast cell lines                   | M-1 | PFKFB3, PSEN1                                         |                     |
| Response of CD4+ T-lymphocytes                      | M-2 |                                                       |                     |
| Contraction of muscle cells                         | M-2 |                                                       |                     |
| Production of protein                               | M-2 |                                                       |                     |
| Production of cytokine                              | M-2 |                                                       |                     |
| Cell death of blood cells                           | M-3 | PCNA, PRL                                             | ITGA4, LGALS8, PCNA |
| Cell movement of squamous cell carcinoma cell lines | M-3 | AURKA                                                 | ITGA4               |
| Response of splenocytes                             | M-2 |                                                       |                     |
| Binding of leukocytes                               | M-3 | CD36, PRL                                             | ITGA4               |
| Fragmentation of Golgi apparatus                    | M-2 |                                                       |                     |
| Cell death of fibroblasts                           | M-2 |                                                       |                     |
| Necrosis of prostate cancer cell lines              | M-2 |                                                       |                     |
| Branching of fibroblast cell lines                  | M-1 | PSEN1                                                 |                     |
| Aggregation of melanosomes                          | M-1 |                                                       | SYTL2               |
| Quantity of alveolar epithelium                     | M-1 | ESR2                                                  |                     |
| Contraction of cardiac muscle                       | M-2 |                                                       |                     |
| Size of dendritic spines                            | M-1 |                                                       | DOCK10              |
| Arrest in G2 phase of skin cancer cell lines        | M-1 | CTNNB1                                                |                     |
| Mitosis of smooth muscle cells                      | M-1 |                                                       | BMP4                |
| Patterning of vessel                                | M-1 | CTNNB1                                                |                     |
| Metabolism by thymocytes                            | M-1 | EGR1                                                  |                     |
| Assembly of mural cells                             | M-1 | SMAD2, SMAD3                                          |                     |
| Quantity of tubulovesicular structures              | M-1 |                                                       |                     |
| Arrest in proliferation of cells                    | M-1 | AKT1, CCND3, CDKN2B, CTNNB1, E2F1, EGR1, IGF1R, SMAD2 | BMP4, HIPK2, TP63   |
| Morphology of dendritic spines                      | M-1 | PFN2, PSEN1                                           | DOCK10              |
| Interphase of kidney cell lines                     | M-1 | ALOX15, ANXA2, CCND3, E2F1                            |                     |
| Development of axial mesendoderm                    | M-1 | SMAD2, SMAD3                                          |                     |
| Enlargement of third cerebral ventricle             | M-1 | PSEN1                                                 |                     |
| Cell-cell adhesion of breast cell lines             | M-1 | CTNNB1                                                |                     |
| Volume of bone                                      | M-1 | IGFBP5, MFAP2                                         | SMURF1              |

|                                                                         |     |                                                     |                                    |
|-------------------------------------------------------------------------|-----|-----------------------------------------------------|------------------------------------|
| Clustering of melanosomes                                               | M-1 |                                                     | SYTL2                              |
| Synthesis of phosphatidylinositol 5-phosphate                           | M-1 |                                                     | MTMR2                              |
| Endothelial barrier function of vascular endothelial cells              | M-1 | ANXA2, CRADD                                        |                                    |
| Function of endothelial cells                                           | M-1 | IGF1R, ITGA5                                        |                                    |
| Function of synapse                                                     | M-1 | PSEN1                                               | MTMR2                              |
| Formation of somites                                                    | M-1 |                                                     |                                    |
| Quantity of hippocampal neurons                                         | M-1 | PSEN1                                               |                                    |
| Remodeling of basement membrane                                         | M-1 | HAS2                                                |                                    |
| Stereotypy                                                              | M-1 |                                                     |                                    |
| Function of excitatory synapses                                         | M-1 |                                                     | MTMR2                              |
| Morphology of right ventricle                                           | M-1 |                                                     | EPAS1                              |
| Conversion of arginine                                                  | M-1 |                                                     |                                    |
| Pigmentation of retinal pigment epithelium                              | M-1 | PSEN1                                               |                                    |
| Homologous pairing of chromosomes                                       | M-1 | SYCP3                                               |                                    |
| Migration of neocortical neurons                                        | M-1 |                                                     | BMP4                               |
| Formation of microspikes                                                | M-1 | AKT1                                                |                                    |
| Morphology of nervous system                                            | M-1 | AKT1, CTNNB1, EGR1, ESR2, IGF1R, MAP1B, PFN2, PSEN1 | ALDH1A2, BMP4, DOCK10, HIPK2, NDE1 |
| Quantity of neurofibrillary tangles                                     | M-1 | PSEN1                                               |                                    |
| Synapsis                                                                | M-1 | SYCP3                                               |                                    |
| Mineralization of bone marrow stromal cells                             | M-1 | JAG1, PSEN1                                         | JAG1                               |
| Clonal expansion of mononuclear phagocyte progenitors                   | M-1 | CSF1R                                               |                                    |
| Morphology of chromosomes                                               | M-1 | CHD4                                                | MEN1                               |
| Morphogenesis of ciliary body                                           | M-1 | JAG1                                                | JAG1                               |
| Patterning of embryo                                                    | M-1 | CTNNB1, E2F1, PSEN1                                 | ALDH1A2                            |
| Hippocampal learning                                                    | M-1 |                                                     | TP63                               |
| Shrinkage of cerebral cortex                                            | M-1 | PSEN1                                               |                                    |
| Arrest in cell cycle progression of mesothelioma cell lines             | M-1 |                                                     | TP63                               |
| Cell-cell adhesion of kidney cell lines                                 | M-1 | CTNNB1                                              |                                    |
| Morphology of exocrine cells                                            | M-1 | CTNNB1, E2F1                                        |                                    |
| Conversion of choline-phospholipid                                      | M-1 |                                                     | ENPP2                              |
| Development of extraembryonic ectoderm                                  | M-1 | CTNNB1                                              |                                    |
| Development of second branchial arch                                    | M-1 | PSEN1                                               |                                    |
| Binding of membrane rafts                                               | M-1 |                                                     |                                    |
| Formation of excitatory synapses                                        | M-1 |                                                     |                                    |
| Adhesion of hepatocytes                                                 | M-1 | SMAD2, SMAD3                                        |                                    |
| Delay in growth of organism                                             | M-1 |                                                     |                                    |
| Response of fibroblasts                                                 | M-1 | AKT1, THBS1                                         |                                    |
| Formation of occipital bone                                             | M-1 |                                                     |                                    |
| Fusion of insulin granule                                               | M-1 |                                                     |                                    |
| Survival of kidney cancer cell lines                                    | M-1 | IGF1R                                               |                                    |
| Survival of mononuclear phagocyte progenitors                           | M-1 | CSF1R                                               |                                    |
| Pathfinding of axons                                                    | M-1 |                                                     |                                    |
| Gap junctional intercellular communication of neuronal progenitor cells | M-1 |                                                     |                                    |
| Differentiation of hair cells                                           | M-1 | CTNNB1                                              |                                    |
| Volume of trabecular bone                                               | M-1 | IGFBP5, MFAP2                                       |                                    |
| Signaling of vascular smooth muscle cells                               | M-1 | IGF1R, THBS1                                        |                                    |
| Penetration of microtubules                                             | M-1 |                                                     |                                    |

|                                                                   |     |             |         |
|-------------------------------------------------------------------|-----|-------------|---------|
| Long term depression of collateral synapses                       | M-1 |             |         |
| Size of thyroid gland                                             | M-1 | AKT1, IGF1R |         |
| Mitochondrial cell death of squamous cell carcinoma cell lines    | M-1 | AKT1        |         |
| Formation of coronary vessel                                      | M-1 | CDKN2B      | ALDH1A2 |
| Differentiation of bile duct                                      | M-1 | JAG1        | JAG1    |
| Rearrangement of cells                                            | M-1 | ETV5        |         |
| Homologous recombination of chromosomes                           | M-1 | AKT1, SYCP3 |         |
| Arrest in cell cycle progression of sarcoma cell lines            | M-1 | IGF1R       | YAP1    |
| Abnormal morphology of chromosomes                                | M-1 | CHD4        |         |
| Cell spreading of endothelial cells                               | M-2 |             |         |
| Length of absolute anatomical region                              | M-2 |             |         |
| Apoptosis of skin cancer cell lines                               | M-2 |             |         |
| Morphology of breast cancer cell lines                            | M-2 |             |         |
| Homing of helper T lymphocytes                                    | M-2 |             |         |
| Anoikis of adenocarcinoma cell lines                              | M-2 |             |         |
| Polarization of decidual macrophages                              | M-2 |             |         |
| Inhibition of Th1 cells                                           | M-2 |             |         |
| Myelination of Schwann cells                                      | M-2 |             |         |
| Ploidy of epithelial cells                                        | M-2 |             |         |
| Morphology of tumor cell lines                                    | M-2 |             |         |
| Emigration of antigen presenting cells                            | M-2 |             |         |
| Release of blood cells                                            | M-2 |             |         |
| Cell death of skin cancer cell lines                              | M-2 |             |         |
| Metabolism of adenosine                                           | M-2 |             |         |
| Localization of cholesterol                                       | M-2 |             |         |
| Induction of Th2 cells                                            | M-2 |             |         |
| Inactivation of macrophages                                       | M-2 |             |         |
| G1 phase of epidermal cells                                       | M-2 |             |         |
| Mitogenesis of T lymphocytes                                      | M-2 |             |         |
| Suppression of helper T lymphocytes                               | M-2 |             |         |
| Frequency of Th1 cells                                            | M-2 |             |         |
| Re-epithelialization                                              | M-2 |             |         |
| Morphogenesis of hair follicle                                    | M-2 |             |         |
| Translocation of L-amino acid                                     | M-2 |             |         |
| Loss of brain cells                                               | M-2 |             |         |
| Writhing                                                          | M-2 |             |         |
| Epithelial-mesenchymal transition of colorectal cancer cell lines | M-2 |             |         |
| Beta-oxidation of very long chain fatty acid                      | M-2 |             |         |
| Length of colon                                                   | M-2 |             |         |
| Anoikis of intestinal cell lines                                  | M-2 |             |         |
| Differentiation of M2c macrophages                                | M-2 |             |         |
| Apoptosis of intestinal cell lines                                | M-2 |             |         |
| Apoptosis of BMMC cells                                           | M-2 |             |         |
| Regulation of osteoblasts                                         | M-2 |             |         |
| Activation of lamellipodia                                        | M-2 |             |         |
| Formation of colony forming unit osteoblasts                      | M-2 |             |         |
| Density of synaptic vesicles                                      | M-2 |             |         |
| Formation of palate                                               | M-2 |             |         |
| Cell viability of hippocampal neurons                             | M-2 |             |         |
| Priming of leukocyte cell lines                                   | M-2 |             |         |
| Adhesion of synovial fibroblasts                                  | M-2 |             |         |

|                                                    |     |
|----------------------------------------------------|-----|
| Proliferation of induced regulatory T-lymphocyte   | M-2 |
| Morphology of actin cytoskeleton                   | M-2 |
| Synthesis of thromboxane B2                        | M-2 |
| Arrest in proliferation of leukocytes              | M-2 |
| Activation of vascular endothelial tissue          | M-2 |
| Morphology of sarcomere                            | M-2 |
| Morphology of Golgi apparatus                      | M-2 |
| Morphology of brain cells                          | M-2 |
| Production of mucus                                | M-2 |
| Survival of plasmacytoid dendritic cells           | M-2 |
| Differentiation of macrophage-like cells           | M-2 |
| Differentiation of naive B cells                   | M-2 |
| Outgrowth of breast cancer cell lines              | M-2 |
| Response of bronchial epithelial cells             | M-2 |
| Mitogenesis of leukocytes                          | M-2 |
| Development of memory natural killer cells         | M-2 |
| Synthesis of genomic DNA                           | M-2 |
| Onset of differentiation of cells                  | M-2 |
| Injury of kidney cell lines                        | M-2 |
| Arrest in proliferation of embryonic cell lines    | M-2 |
| Stimulation of synovial fibroblasts                | M-2 |
| Cell movement of Th2 cells                         | M-2 |
| Beta-oxidation of lignoceric acid                  | M-2 |
| G1/S phase transition of epidermal cells           | M-2 |
| Apoptosis of endometrial cancer cell lines         | M-2 |
| Development of aortic arch                         | M-2 |
| Killing of Leishmania major                        | M-2 |
| Quantity of homocysteine                           | M-2 |
| Development of cerebral cortex                     | M-2 |
| Fragmentation of nucleus                           | M-2 |
| Suppression of bone marrow-derived dendritic cells | M-2 |
| Movement of myeloma cell lines                     | M-2 |
| Morphology of cerebral cortex cells                | M-2 |
| Proliferation of bronchial epithelial cells        | M-2 |
| Quantity of cellular inclusion bodies              | M-2 |
| G1 phase of keratinocytes                          | M-2 |
| Response of lung cancer cell lines                 | M-2 |
| Differentiation of Ab-secreting B cells            | M-2 |
| Co-stimulation of blood cells                      | M-2 |
| Induction of PBMCs                                 | M-2 |
| Induction of naive T lymphocytes                   | M-2 |
| Demethylation of DNA                               | M-2 |
| Contraction of smooth muscle cells                 | M-2 |
| Translocation of glutamine family amino acid       | M-2 |
| Cell movement of helper T lymphocytes              | M-2 |
| G1 phase of carcinoma cell lines                   | M-2 |
| Re-epithelialization of skin                       | M-2 |
| Cell movement of prostate cell lines               | M-2 |

|                                                               |     |           |               |
|---------------------------------------------------------------|-----|-----------|---------------|
| Polarization of macrophage cancer cell lines                  | M-2 |           |               |
| Differentiation of cytotoxic T cells                          | M-2 |           |               |
| Anoikis of prostate cancer cell lines                         | M-2 |           |               |
| Oversecretion of mucus                                        | M-2 |           |               |
| Loss of cerebral cortex cells                                 | M-2 |           |               |
| Induction of antigen presenting cells                         | M-2 |           |               |
| Development of artery                                         | M-2 |           |               |
| Recruitment of protein                                        | M-2 |           |               |
| Contact growth inhibition of kidney cancer cell lines         | M-2 |           |               |
| Apoptosis of trophoblast cells                                | M-2 |           |               |
| Generation of monocyte-derived dendritic cells                | M-2 |           |               |
| Proliferation of memory B cells                               | M-2 |           |               |
| Quantity of Staphylococcus aureus                             | M-2 |           |               |
| Sprouting of sensory neurons                                  | M-2 |           |               |
| Differentiation of effector cytotoxic T lymphocytes           | M-2 |           |               |
| Generation of Tr1 cells                                       | M-2 |           |               |
| Formation of brain                                            | M-3 | PRL       |               |
| Breakage of double-stranded DNA                               | M-3 | PCNA, PRL | PCNA          |
| Cell-cell contact of tumor cell lines                         | M-3 |           | LGALS8        |
| Proliferation of mammary duct                                 | M-3 | PRL       |               |
| Chemotaxis of skin cell lines                                 | M-3 | CD36      |               |
| Quantity of cell-associated matrix                            | M-3 | VCAN      |               |
| Proliferation of epiblast cells                               | M-3 |           |               |
| Association of DNA damage focus                               | M-3 | PCNA      | PCNA          |
| Formation of airspace                                         | M-3 | FGF9      |               |
| Cell spreading of gonadal cell lines                          | M-3 |           | ITGA4, LGALS8 |
| Derepression of RNA                                           | M-3 |           |               |
| Quantity of hibernating gland                                 | M-3 | ADAM12    |               |
| G2/M phase transition of fibroblast cell lines                | M-3 |           |               |
| Proliferation of mammary alveolus                             | M-3 | PRL       |               |
| Electrical resistance of breast cell lines                    | M-3 | PRL       |               |
| Delay in mitosis of tumor cell lines                          | M-3 | AURKA     |               |
| Delay in mitosis of cervical cancer cell lines                | M-3 | AURKA     |               |
| Assembly of central spindle                                   | M-3 | AURKA     |               |
| Synthesis of steroid hormone                                  | M-3 | FGF9, PRL |               |
| Fusion of myoblasts                                           | M-3 | ADAM12    |               |
| Arrest in cell cycle progression of embryonic stem cell lines | M-3 |           |               |
| Maturation of oocytes                                         | M-3 |           |               |
| Healing of gonadal cell lines                                 | M-3 |           |               |
| Binding of hematopoietic progenitor cells                     | M-3 | PRL       | ITGA4         |
| Removal of cystine                                            | M-3 | PRL       |               |
| Adhesion of bronchial epithelial cells                        | M-3 |           | ITGA4         |
| Mitogenesis of endometrial stromal cells                      | M-3 | FGF9      |               |
| Budding of lobules of mammary gland                           | M-3 | PRL       |               |
| Generation of actin filaments                                 | M-3 | PRL       |               |
| Nucleation of filaments                                       | M-3 |           |               |
| Arrest in oogenesis                                           | M-3 |           |               |
| Generation of membrane ruffles                                | M-3 | PRL       |               |
| Development of epithelial bud                                 | M-3 | FGF9      |               |
| Regulation of granulosa cells                                 | M-3 | PRL       |               |



|                                                                |     |           |               |
|----------------------------------------------------------------|-----|-----------|---------------|
| Differentiation of reactive astrocytes                         | M-3 | VCAN      |               |
| Incorporation of 15-(4-iodophenyl)-3-methylpentadecanoic acid  | M-3 | CD36      |               |
| Arrest in cell rolling of leukocytes                           | M-3 |           | ITGA4         |
| Development of cecum                                           | M-3 | FGF9      |               |
| Remyelination of posterior funiculus                           | M-3 | PRL       |               |
| Regeneration of tibia                                          | M-3 | FGF9      |               |
| Binding of antigen presenting cells                            | M-3 |           | ITGA4         |
| Cell movement of gonadal cell lines                            | M-3 | ADAM12    | ITGA4, LGALS8 |
| Delay in G1/S phase transition of prostate cancer cell lines   | M-3 |           |               |
| Attachment of endometrial cancer cell lines                    | M-3 | CD36      |               |
| Meiosis of germ cells                                          | M-3 | AURKA     |               |
| Acetylation of chromatin                                       | M-3 | PCNA      | PCNA          |
| Arrest in cleavage of embryo                                   | M-3 |           |               |
| Clearance of Plasmodium                                        | M-3 | CD36      |               |
| Delay in initiation of cell spreading of gonadal cell lines    | M-3 |           |               |
| Enlargement of prostate gland                                  | M-3 | PRL       |               |
| Differentiation of microvasculature                            | M-3 | FGF9      |               |
| Adhesion of sarcoma cell lines                                 | M-3 | VCAN      | ITGA4         |
| Binding of cord blood cells                                    | M-3 |           | ITGA4         |
| Micronucleation of breast cancer cell lines                    | M-3 |           |               |
| Arrest in cell movement of myeloid cells                       | M-3 |           | ITGA4         |
| Binding of plasmid DNA                                         | M-3 | PCNA      | PCNA          |
| Relaxation of mesenteric artery                                | M-3 |           |               |
| Attachment of embryonic cancer cell lines                      | M-3 | CD36      |               |
| Aneuploidy                                                     | M-3 | AURKA     |               |
| Modulation of microtubules                                     | M-3 | AURKA     |               |
| Quantity of hair follicle                                      | M-3 | FGF9      |               |
| Recruitment of hyaluronic acid                                 | M-3 | VCAN      |               |
| Mitotic catastrophe of rhabdoid cell lines                     | M-3 | AURKA     |               |
| Cell spreading of bladder cancer cell lines                    | M-3 |           | LGALS8        |
| Accumulation of pancreatic cancer cell lines                   | M-3 | AURKA     |               |
| Caspase-independent cell death of pancreatic cancer cell lines | M-3 | AURKA     |               |
| Differentiation of mammary gland                               | M-3 | PRL       |               |
| Thickness of vascular smooth muscle cells                      | M-3 |           |               |
| Cell-cell adhesion of vascular endothelial cells               | M-3 |           | LGALS8        |
| Quantity of spindle cells                                      | M-3 | VCAN      |               |
| Delay in mitosis of breast cancer cell lines                   | M-3 |           |               |
| Remyelination                                                  | M-3 | PRL       |               |
| Cell rolling of mononuclear leukocytes                         | M-3 |           | ITGA4         |
| Synthesis of pregnenolone                                      | M-3 | FGF9, PRL |               |
| Fusion of chorion                                              | M-3 |           | ITGA4         |
| Morphogenesis of gland                                         | M-3 | PRL       |               |
| Sensitivity of gonadal cell lines                              | M-3 | PCNA      | PCNA          |
| Relaxation of mesenteric resistance artery                     | M-3 |           |               |
| Synthesis of catecholamine                                     | M-3 | PRL       |               |

|                                                          |        |             |       |
|----------------------------------------------------------|--------|-------------|-------|
| Density of sinusoid                                      | M-3    |             |       |
| Chemotaxis of endothelial cell lines                     | M-3    | CD36        |       |
| Cell rolling of blood cells                              | M-3    | CD36        | ITGA4 |
| Elastogenesis of fibroblasts                             | M-3    | VCAN        |       |
| Size of gonad                                            | M-3    |             |       |
| Morphology of reproductive system                        | M-3    | PRL         |       |
| Relaxation of artery                                     | M-3    | PRL         |       |
| Attraction of phagocytes                                 | M-3    | VCAN        |       |
| Quantity of intramyocellular lipid store                 | M-3    |             |       |
| Survival of rhabdoid cell lines                          | M-3    | AURKA       |       |
| Contractility of dermal fibroblasts                      | M-3    | VCAN        |       |
| Outgrowth of dorsal root ganglion cells                  | M-3    | VCAN        |       |
| Binding of T lymphoblasts                                | M-3    |             | ITGA4 |
| Neovascularization of tibia                              | M-3    | FGF9        |       |
| Mutagenesis of gene                                      | M-3    | PCNA        | PCNA  |
| S phase of fibroblast cell lines                         | M-3    |             |       |
| Senescence of embryonic cell lines                       | M-3    | VCAN        |       |
| Fusion of allantois                                      | M-3    |             | ITGA4 |
| Proliferation of embryonic tissue                        | M-3    | FGF9        |       |
| Arborization of mammary duct                             | M-3    | PRL         |       |
| Migration of mesonephric cells                           | M-3    | FGF9        |       |
| Delay in initiation of clearance of pneumocytes          | M-3    | CD36        |       |
| Generation of filaments                                  | M-3    | PRL         |       |
| Binding of T lymphocytes                                 | M-3    | PRL         | ITGA4 |
| Adhesion of hepatic stellate cells                       | M-3    | ADAM12      |       |
| Uptake of omega-(4-iodophenyl)pentadecanoic acid         | M-3    | CD36        |       |
| Depletion of hyaluronic acid                             | M-3    | VCAN        |       |
| Function of blood cells                                  | M-3    | CD36        |       |
| Branching of mammary gland                               | M-3    | PRL         |       |
| Delay in cell cycle progression of tumor cell lines      | M-3    | AURKA, PCNA | PCNA  |
| Chemotaxis of vascular endothelial cells                 | M-3    | CD36        |       |
| Expansion of basal stem cells                            | M-3    |             |       |
| Depletion of polysaccharide                              | M-3    | CD36, VCAN  |       |
| Growth of genital organ                                  | M-3    | FGF9, PRL   |       |
| Growth of decidua                                        | M-3    | PRL         |       |
| Recruitment of leukemia cell lines                       | M-3    |             | ITGA4 |
| Isovolumetric relaxation time of left ventricle          | M-3    | THBS4       |       |
| Differentiation of pulmonary alveolus                    | M-3    | FGF9, PRL   |       |
| Density of intrasyncytial bays                           | M-3    |             |       |
| Binding of p53 consensus binding site                    | M-3    |             |       |
| Morphology of smooth muscle cells                        | M-3    |             |       |
| Apoptosis of rhabdoid cell lines                         | M-3    | AURKA       |       |
| Aneuploidy of embryonic cell lines                       | EGA1-1 |             |       |
| Catabolism of D-glucose                                  | EGA1-1 |             |       |
| Myelination of central nervous system                    | EGA1-1 |             |       |
| G1 phase of lung cell lines                              | EGA1-1 |             |       |
| Arrest in cell cycle progression of B lymphocytes        | EGA1-1 |             |       |
| Delay in cell cycle progression of fibroblast cell lines | EGA1-1 |             |       |
| Entry into mitosis of fibroblast cell lines              | EGA1-1 |             |       |

|                                                            |        |
|------------------------------------------------------------|--------|
| Entry into cell cycle progression of fibroblast cell lines | EGA1-1 |
| Entry into S phase of epithelial cell lines                | EGA1-1 |
| G1/S phase transition of lung cell lines                   | EGA1-1 |
| Myelination of corpus callosum                             | EGA1-1 |
| Size of hepatocytes                                        | EGA1-1 |
| Rearrangement of chromosomes                               | EGA1-1 |
| Cloning of cells                                           | EGA1-1 |
| Aneuploidy of fibroblast cell lines                        | EGA1-1 |
| Duplication of body axis                                   | EGA1-1 |
| Delay in cell cycle progression                            | EGA1-1 |
| G1 phase of fibroblast cell lines                          | EGA1-1 |
| Apoptosis of squamous cell carcinoma cell lines            | EGA1-1 |
| Stimulation of fibroblast cell lines                       | EGA1-1 |
| Colony survival of tumor cell lines                        | EGA1-1 |
| Arrest in proliferation of lung cell lines                 | EGA1-1 |
| Repair of cervical cancer cell lines                       | EGA1-1 |
| Transcription of mRNA                                      | EGA1-1 |
| Differentiation of plasma cells                            | EGA1-1 |
| G1 phase of kidney cell lines                              | EGA1-1 |
| Size of tumor cell lines                                   | EGA1-1 |
| Accumulation of tumor cell lines                           | EGA1-1 |
| Self-renewal of lymphatic system cells                     | EGA1-1 |
| Synthesis of rRNA                                          | EGA1-1 |
| Mobilization of mononuclear leukocytes                     | EGA1-1 |
| Cell survival of tumor cell lines                          | EGA1-1 |
| Depletion of ATP                                           | EGA1-1 |
| Proliferation of synovial fibroblasts                      | EGA1-1 |
| Incorporation of octanoic acid                             | EGA1-1 |
| G1 phase of uterine cell lines                             | EGA1-1 |
| Ploidy of keratinocytes                                    | EGA1-1 |
| Expansion of T-cell zone                                   | EGA1-1 |
| Cloning of melanoma cell lines                             | EGA1-1 |
| Formation of marginal stream                               | EGA1-1 |
| Gene amplification of B-lymphocyte derived cell lines      | EGA1-1 |
| Mitosis of Schwann cells                                   | EGA1-1 |
| Retention of granulocyte progenitors                       | EGA1-1 |
| Size of lymphatic sinus                                    | EGA1-1 |
| Entrance of DNA                                            | EGA1-1 |
| Morphology of Tip cells                                    | EGA1-1 |
| Entry into S phase of melanoma cell lines                  | EGA1-1 |
| Circulation of daunorubicin                                | EGA1-1 |
| Localization of cortical interneurons                      | EGA1-1 |
| Polyploidization of B-lymphocyte derived cell lines        | EGA1-1 |
| Formation of extrachromosomal cores                        | EGA1-1 |
| Flow of lymphatic fluid                                    | EGA1-1 |
| Polyploidization of epithelial cell lines                  | EGA1-1 |
| Quantity of lymphatic sinus                                | EGA1-1 |
| Initiation of differentiation of epidermal cells           | EGA1-1 |
| Proliferation of photoreceptors                            | EGA1-1 |
| Methylation of L-arginine                                  | EGA1-1 |

|                                                           |        |
|-----------------------------------------------------------|--------|
| Replicative senescence of ovarian cancer cell lines       | EGA1-1 |
| Maintenance of central memory cytotoxic T cells           | EGA1-1 |
| Killing of B cell hybridoma cells                         | EGA1-1 |
| Formation of replication fork                             | EGA1-1 |
| Arrest in G1/S phase transition of endothelial cell lines | EGA1-1 |
| Influx of nitrate                                         | EGA1-1 |
| Cell division of lymphoma cell lines                      | EGA1-1 |
| Polyploidization of kidney cell lines                     | EGA1-1 |
| Delay in G1/S phase transition of chondrocytes            | EGA1-1 |
| Retention of pro-B lymphocytes                            | EGA1-1 |
| Elimination of leukemia cell lines                        | EGA1-1 |
| Immortalization of leukocyte cell lines                   | EGA1-1 |
| Arrest in G1/S phase transition of breast cell lines      | EGA1-1 |
| Maturation of lymphatic system cells                      | EGA1-1 |
| Activation of mitochondria                                | EGA1-1 |
| Arrest in G2/M phase transition                           | EGA1-1 |
| Mitosis of cervical cancer cell lines                     | EGA1-1 |
| Entry into S phase of fibroblasts                         | EGA1-1 |
| Interphase of melanoma cell lines                         | EGA1-1 |
| Morphology of mitotic spindle                             | EGA1-1 |
| Morphology of osteoclasts                                 | EGA1-1 |
| Entry into S phase of fibroblast cell lines               | EGA1-1 |
| Formation of spindle apparatus                            | EGA1-1 |
| Accumulation of glutamine                                 | EGA1-1 |
| Engraftment of hematopoietic progenitor cells             | EGA1-1 |
| Fusion of styloid process of temporal bone                | EGA1-1 |
| Quantity of alpha-tocopherol phosphate                    | EGA1-1 |
| Invasion of B cell hybridoma cells                        | EGA1-1 |
| Cytostasis of gonadal cell lines                          | EGA1-1 |
| Catabolism of glutamine                                   | EGA1-1 |
| Invasion by boundary cap cells                            | EGA1-1 |
| DNA damage response of colorectal cancer cell lines       | EGA1-1 |
| Area of aortic valve                                      | EGA1-1 |
| Formation of mucus                                        | EGA1-1 |
| Differentiation of cholangiocarcinoma cell lines          | EGA1-1 |
| Arrest in G2/M phase transition of keratinocytes          | EGA1-1 |
| Senescence of B lymphocytes                               | EGA1-1 |
| Reactivation of fibroblasts                               | EGA1-1 |
| Quantity of spirochete                                    | EGA1-1 |
| Entry into S phase of intestinal cell lines               | EGA1-1 |
| Initiation of alveolization                               | EGA1-1 |
| Arrest in G0/G1 phase transition of endothelial cells     | EGA1-1 |
| Accumulation of skin cancer cell lines                    | EGA1-1 |
| Beta-oxidation of octanoic acid                           | EGA1-1 |
| Transmigration of endothelial tissue                      | EGA1-1 |

|                                                              |        |
|--------------------------------------------------------------|--------|
| Maintenance of memory natural killer cells                   | EGA1-1 |
| Deficiency of non-plasmacytoid dendritic cells               | EGA1-1 |
| Expansion of pro-B lymphocytes                               | EGA1-1 |
| Migration of dental pulp stem cells                          | EGA1-1 |
| Radioresistance of hepatoma cell lines                       | EGA1-1 |
| Cloning of fibroblast cell lines                             | EGA1-1 |
| Proliferation of pancreatic duct cells                       | EGA1-1 |
| Extravasation of hepatoma cell lines                         | EGA1-1 |
| Mid-G1 phase                                                 | EGA1-1 |
| Tubulation of tumor cell lines                               | EGA1-1 |
| Preservation of elastic lamina                               | EGA1-1 |
| Homing of progenitor cells                                   | EGA1-1 |
| Arrest in G0/G1 phase transition of rhabdoid cell lines      | EGA1-1 |
| Termination of cell cycle progression of fibroblasts         | EGA1-1 |
| Senescence of B-lymphoid cells                               | EGA1-1 |
| Segmentation of occipital bone                               | EGA1-1 |
| Extravasation of colorectal cancer cell lines                | EGA1-1 |
| Quantity of apoptotic oligodendrocytes                       | EGA1-1 |
| Radioresistance of cervical cancer cell lines                | EGA1-1 |
| Killing of macrophage cancer cell lines                      | EGA1-1 |
| Conversion of bile acid                                      | EGA1-1 |
| Accumulation of colonocytes                                  | EGA1-1 |
| Area of endothelial tube                                     | EGA1-1 |
| Cell cycle progression of brain cancer cell lines            | EGA1-1 |
| Expansion of pro-T lymphocytes                               | EGA1-1 |
| Proliferation of lymphocyte precursor cells                  | EGA1-1 |
| Morphology of mesenchymal stem cells                         | EGA1-1 |
| Segmentation of basilar bone                                 | EGA1-1 |
| Size of brain cancer cell lines                              | EGA1-1 |
| Invasion of lung cancer cell lines                           | EGA1-1 |
| Migration of mesenchymal stem cells                          | EGA1-1 |
| Binding of guanosine 5'-O-(3-thiotriphosphate)               | EGA1-1 |
| Arrest in G1 phase of embryonic cell lines                   | EGA1-1 |
| Arrest in interphase of kidney cell lines                    | EGA1-1 |
| Mass of mitochondria                                         | EGA1-1 |
| Proliferation of lung cell lines                             | EGA1-1 |
| G1 phase of fibroblasts                                      | EGA1-1 |
| Size of lymphatic system cells                               | EGA1-1 |
| Invasion of cervical cancer cell lines                       | EGA1-1 |
| Quantity of oligodendrocytes                                 | EGA1-1 |
| Resorption of bone                                           | EGA1-1 |
| Maturation of lymphocytes                                    | EGA1-1 |
| Arrest in sub-G1 phase of squamous cell carcinoma cell lines | EGA1-1 |

|                                                                          |        |
|--------------------------------------------------------------------------|--------|
| Delay in initiation of differentiation of induced pluripotent stem cells | EGA1-1 |
| Deletion of chromosomes                                                  | EGA1-1 |
| Accumulation of kidney cell lines                                        | EGA1-1 |
| Colony survival of lymphoma cell lines                                   | EGA1-1 |
| Stimulation of embryonic cell lines                                      | EGA1-1 |
| Polyploidy of fibroblast cell lines                                      | EGA1-1 |
| Synthesis of acetyl-coenzyme A                                           | EGA1-1 |
| Size of lymphoma cell lines                                              | EGA1-1 |
| Length of endothelial tube                                               | EGA1-1 |
| Thickness of tunica intima                                               | EGA1-1 |
| Cell polarity formation of colorectal cancer cell lines                  | EGA1-1 |
| Polarization of CD4+ T-lymphocytes                                       | EGA1-1 |
| Morphology of fibrous cap                                                | EGA1-1 |
| Binding of CD4+ T-lymphocytes                                            | EGA1-1 |
| Arrest in G1 phase of erythroblasts                                      | EGA1-1 |
| Morphology of cortical projection neurons                                | EGA1-1 |
| Quantity of 1-palmitoyl-2-glutaryl-sn-glycero-3-phosphorylcholine        | EGA1-1 |
| Homologous recombination repair of cervical cancer cell lines            | EGA1-1 |
| Delay in cell cycle progression of epithelial cell lines                 | EGA1-1 |
| Poly(ADP-ribosyl)ation of protein                                        | EGA1-1 |
| Migration of gastrointestinal stromal tumor cell lines                   | EGA1-1 |
| Arrest in cell cycle progression of hepatocytes                          | EGA1-1 |
| Chemotaxis of cerebellar granule cell                                    | EGA1-1 |
| Function of aortic valve                                                 | EGA1-1 |
| Trafficking of hematopoietic progenitor cells                            | EGA1-1 |
| Quantity of 1-palmitoyl-2-(5-oxovaleroyl)-sn-glycero-3-phosphorylcholine | EGA1-1 |
| Proliferation of central memory cytotoxic T cells                        | EGA1-1 |
| Outgrowth of ovarian cancer cell lines                                   | EGA1-1 |
| Development of organ of Corti                                            | EGA1-1 |
| Homing of inflammatory leukocytes                                        | EGA1-1 |
| Cell cycle progression of skeletal muscle satellite cells                | EGA1-1 |
| Differentiation of sebocytes                                             | EGA1-1 |
| Deamination of adenosine                                                 | EGA1-1 |
| Formation of kinetochore microtubule                                     | EGA1-1 |
| Uptake of lipoprotein                                                    | EGA1-1 |
| Pre-TCR checkpoint of pro-T3 thymocytes                                  | EGA1-1 |
| Initiation of S phase                                                    | EGA1-1 |
| Expansion of hematopoietic progenitor cells                              | EGA1-1 |
| Meiotic nondisjunction                                                   | EGA1-1 |
| Self-renewal of cells                                                    | EGA1-1 |
| Homologous recombination of cells                                        | EGA2-1 |
| Repression of RNA                                                        | EGA2-1 |
| Pluripotency of embryonic cell lines                                     | EGA2-1 |

|                                                             |        |             |       |
|-------------------------------------------------------------|--------|-------------|-------|
| Cell viability of colorectal cancer cell lines              | EGA2-1 |             |       |
| Pluripotency of embryonic stem cell lines                   | EGA2-1 |             |       |
| Proliferation of embryonic stem cells                       | EGA2-1 |             |       |
| Synthesis of protein                                        | EGA2-1 |             |       |
| Inhibition of leukocytes                                    | EGA2-1 |             |       |
| Hydrolysis of nucleotide                                    | EGA2-1 |             |       |
| Formation of ribosome                                       | EGA2-1 |             |       |
| Processing of rRNA                                          | EGA2-1 |             |       |
| Biosynthesis of nucleoside triphosphate                     | EGA2-1 |             |       |
| Autophagy of embryonic cell lines                           | EGA2-1 |             |       |
| Permeability of intestine                                   | EGA2-1 |             |       |
| Autophagy of bone cancer cell lines                         | EGA2-1 |             |       |
| G2/M phase                                                  | EGA2-1 |             |       |
| Cell death of sarcoma cell lines                            | EGA2-2 | DPP4, HSPA5 | LAMP1 |
| Cell death of bone cancer cell lines                        | EGA2-2 | DPP4        | LAMP1 |
| Hydrolysis of ATP                                           | EGA2-1 |             |       |
| Processing of RNA                                           | EGA2-1 |             |       |
| Cell viability of breast cancer cell lines                  | EGA2-1 |             |       |
| Synthesis of protein                                        | EGA2-2 | HSPA5       |       |
| Translation                                                 | EGA2-2 | HSPA5       |       |
| Differentiation of embryonic tissue                         | EGA2-1 |             |       |
| Cell death of colorectal cancer cell lines                  | EGA2-1 |             |       |
| Initiation of transcription                                 | EGA2-1 |             |       |
| Translation                                                 | EGA2-1 |             |       |
| Cell death of ovarian cancer cell lines                     | EGA2-1 |             |       |
| Apoptosis of ovarian cancer cell lines                      | EGA2-1 |             |       |
| Formation of microtubules                                   | EGA2-1 |             |       |
| G2/M phase of tumor cell lines                              | EGA2-1 |             |       |
| Internalization of protein                                  | EGA2-1 |             |       |
| Contraction of heart ventricle                              | EGA2-1 |             |       |
| Decay of RNA                                                | EGA2-1 |             |       |
| Cell viability of gastrointestinal stromal tumor cell lines | EGA2-1 |             |       |
| Cell proliferation of carcinoma cell lines                  | EGA2-1 |             |       |
| G1 phase of tumor cell lines                                | EGA2-1 |             |       |
| Cell death of pheochromocytoma cell lines                   | EGA2-1 |             |       |
| Degradation of mitochondria                                 | EGA2-1 |             |       |
| Cell death of bone cancer cell lines                        | EGA2-1 |             |       |
| Cell death of immune cells                                  | EGA2-4 | SLC2A1      |       |
| Cell death of central nervous system cells                  | EGA2-1 |             |       |
| Invasion of stomach cancer cell lines                       | EGA2-1 |             |       |
| Cell death of melanoma cell lines                           | EGA2-1 |             |       |
| Quantity of hematopoietic progenitor cells                  | EGA2-2 |             |       |
| Premature senescence of fibroblast cell lines               | EGA2-1 |             |       |
| Interphase of fibroblast cell lines                         | EGA2-1 |             |       |
| Cell proliferation of carcinoma cell lines                  | EGA2-2 |             | EPCAM |
| Interphase of colorectal cancer cell lines                  | EGA2-1 |             |       |
| Apoptosis of synovial fibroblasts                           | EGA2-1 |             |       |
| Amplification of centrosome                                 | EGA2-1 |             |       |
| Maturation of connective tissue                             | EGA2-2 |             |       |

|                                                   |        |
|---------------------------------------------------|--------|
| G2 phase of tumor cell lines                      | EGA2-1 |
| Cell death of stem cells                          | EGA2-1 |
| Cell death of sarcoma cell lines                  | EGA2-1 |
| Repair of DNA                                     | EGA2-2 |
| Cytostasis of connective tissue cells             | EGA2-1 |
| Size of dendritic trees                           | EGA2-1 |
| Initiation of S phase of kidney cell lines        | EGA2-1 |
| Cell death of spleen-derived dendritic cells      | EGA2-1 |
| Mitosis of fibroblast cell lines                  | EGA2-1 |
| Quantity of ursodeoxycholic acid                  | EGA2-1 |
| Stabilization of mitochondria                     | EGA2-1 |
| Mitochondrial membrane potential                  | EGA2-1 |
| Calcium homeostasis of endoplasmic reticulum      | EGA2-1 |
| Arrest in G1 phase                                | EGA2-1 |
| Initiation of synthesis of protein                | EGA2-1 |
| Formation of nucleosomes                          | EGA2-1 |
| Arrest in G1 phase of tumor cell lines            | EGA2-1 |
| Arrest in growth of neuronal progenitor cells     | EGA2-1 |
| Cell cycle progression of fibroblasts             | EGA2-1 |
| Arrest in interphase of tumor cell lines          | EGA2-1 |
| Development of embryonic stem cells               | EGA2-1 |
| Cell death of megakaryocytes                      | EGA2-1 |
| Mitotic exit of cervical cancer cell lines        | EGA2-1 |
| Apoptosis of bone marrow-derived neutrophils      | EGA2-1 |
| Aggregation of skin cell lines                    | EGA2-1 |
| Arrest in G1 phase of lung cancer cell lines      | EGA2-1 |
| Implantation of embryo                            | EGA2-1 |
| Cell cycle progression of bone cancer cell lines  | EGA2-1 |
| G2/M phase of colorectal cancer cell lines        | EGA2-1 |
| Aggregation of carcinoma cell lines               | EGA2-1 |
| Morphology of epithelial cell lines               | EGA2-1 |
| Arrest in G1 phase of breast cancer cell lines    | EGA2-1 |
| G2/M phase of breast cell lines                   | EGA2-1 |
| Binding of chromosomes                            | EGA2-1 |
| G2 phase of colorectal cancer cell lines          | EGA2-1 |
| G1 phase of breast cancer cell lines              | EGA2-1 |
| Arrest in G2 phase                                | EGA2-1 |
| Production of C18-ceramide                        | EGA2-1 |
| Cell cycle progression of connective tissue cells | EGA2-1 |
| Arrest in G2/M phase of tumor cell lines          | EGA2-1 |
| Arrest in G2/M phase                              | EGA2-1 |
| Formation of apoptosome                           | EGA2-1 |
| Aggregation of epithelial cell lines              | EGA2-1 |
| Morphology of Peyer's patches                     | EGA2-1 |
| Decay of mRNA                                     | EGA2-1 |



|                                                           |        |      |
|-----------------------------------------------------------|--------|------|
| Killing of bone marrow-derived dendritic cells            | EGA2-1 |      |
| Elongation of protein                                     | EGA2-1 |      |
| Morphology of muscle cell lines                           | EGA2-1 |      |
| Arrest in cell cycle progression of muscle cells          | EGA2-1 |      |
| Opening of permeability transition pores                  | EGA2-1 |      |
| Synthesis of retinyl ester                                | EGA2-1 |      |
| Transmission of lipopolysaccharide                        | EGA2-1 |      |
| Production of natural killer precursor cells              | EGA2-1 |      |
| Mitosis of liver cells                                    | EGA2-1 |      |
| Proliferation of glandular epithelial cells               | EGA2-1 |      |
| Arrest in interphase                                      | EGA2-1 |      |
| Cell survival of fibroblast cell lines                    | EGA2-1 |      |
| Annealing of hnRNA                                        | EGA2-1 |      |
| Differentiation of reticulocytes                          | EGA2-1 |      |
| Arrest in growth of keratinocytes                         | EGA2-1 |      |
| Maturation of rRNA                                        | EGA2-1 |      |
| Permeability of mitochondrial outer membrane              | EGA2-1 |      |
| Homeostasis of metal ion                                  | EGA2-1 |      |
| Recruitment of vesicles                                   | EGA2-1 |      |
| Arrest in G2 phase of tumor cell lines                    | EGA2-1 |      |
| Survival of yeast                                         | EGA2-1 |      |
| Import of green fluorescent protein                       | EGA2-1 |      |
| Structural integrity of nucleosomes                       | EGA2-1 |      |
| Delay in mitosis                                          | EGA2-1 |      |
| Migratory capacity of melanoma cell lines                 | EGA2-1 |      |
| Morphology of chromatin                                   | EGA2-1 |      |
| Replication of genomic DNA                                | EGA2-1 |      |
| Exit from G1 phase                                        | EGA2-1 |      |
| Formation of ribosome                                     | EGA2-2 |      |
| Vacuolation of melanocytes                                | EGA2-2 | CTSV |
| Cell viability of mast cells                              | EGA2-2 |      |
| Initiation of cohesion of sister telomere                 | EGA2-2 |      |
| Scaling of inner root sheath                              | EGA2-2 | CTSV |
| Thickening of cardiomyocytes                              | EGA2-2 |      |
| Proliferation of melanocytes                              | EGA2-2 | CTSV |
| Quantity of lung tissue                                   | EGA2-2 |      |
| Maturation of red blood cells                             | EGA2-2 |      |
| Degradation of chromosomes                                | EGA2-2 |      |
| Attachment of desmosomes                                  | EGA2-2 |      |
| Re-entry into M phase of lung cell lines                  | EGA2-2 |      |
| Recovery of heart ventricle                               | EGA2-2 |      |
| Damage of cellular membrane                               | EGA2-2 |      |
| Proliferation of peripheral blood leukocytes              | EGA2-2 | DPP4 |
| Initiation of S phase of smooth muscle cells              | EGA2-2 |      |
| Oxidative stress response of macrophage cancer cell lines | EGA2-2 |      |
| Arrest in G1 phase of carcinoma cell lines                | EGA2-2 |      |
| Transmembrane transport of D-glucose                      | EGA2-2 |      |

|                                                            |        |       |       |
|------------------------------------------------------------|--------|-------|-------|
| Quantity of LH                                             | EGA2-2 |       |       |
| Migration of podocytes                                     | EGA2-2 | CTSV  |       |
| Radiosensitivity of lung cell lines                        | EGA2-2 |       |       |
| Colony formation of Helicobacter pylori 10700              | EGA2-2 |       |       |
| Binding of mitochondria                                    | EGA2-2 |       |       |
| Maturation of hematopoietic progenitor cells               | EGA2-2 |       |       |
| Quantity of carcinoma cell lines                           | EGA2-2 |       |       |
| Maturation of satellite cells                              | EGA2-2 |       |       |
| Polyploidization of colorectal cancer cell lines           | EGA2-2 |       |       |
| Cell viability of leukemia cell lines                      | EGA2-2 | HSPA5 |       |
| Contraction of arteriole                                   | EGA2-2 |       |       |
| Arrest in G2/M phase transition of leukemia cell lines     | EGA2-2 | DPP4  |       |
| Organization of myoepithelial cells                        | EGA2-2 |       |       |
| Maturation of osteoclasts                                  | EGA2-2 |       |       |
| Healing of gastric mucosa                                  | EGA2-2 |       |       |
| Folding of protein                                         | EGA2-2 | HSPA5 |       |
| Thickness of gingiva                                       | EGA2-2 | CTSV  |       |
| Migration of prostate cancer cells                         | EGA2-2 | DPP4  |       |
| Metabolism by embryonic cell lines                         | EGA2-2 |       | EPCAM |
| Morphogenesis of mammary alveolus                          | EGA2-2 |       |       |
| Metabolism by fibroblast cell lines                        | EGA2-2 |       | EPCAM |
| Disassembly of actin filaments                             | EGA2-2 |       | CAP1  |
| Import of DNA                                              | EGA2-2 |       |       |
| Cell viability of leukocyte cell lines                     | EGA2-2 |       |       |
| Stabilization of chromosomes                               | EGA2-2 |       |       |
| Interphase of embryonic cell lines                         | EGA2-2 |       |       |
| Breakdown of heme                                          | EGA2-2 |       |       |
| Attachment of intermediate filaments                       | EGA2-2 |       |       |
| Stress response of tumor cell lines                        | EGA2-2 | HSPA5 |       |
| Pluripotency of fibroblast cell lines                      | EGA2-2 |       |       |
| Oxidative stress response of melanoma cell lines           | EGA2-2 |       |       |
| Morphology of heart cells                                  | EGA2-2 |       |       |
| Metabolism by squamous cell carcinoma cell lines           | EGA2-2 |       | EPCAM |
| Quantity of intestinal cells                               | EGA2-2 |       |       |
| Fusion of chromosomes                                      | EGA2-2 |       |       |
| Cell viability of stem cells                               | EGA2-2 |       |       |
| Formation of epidermis                                     | EGA2-2 | CTSV  |       |
| Dissociation of chromosomes                                | EGA2-2 |       |       |
| Organization of luminal epithelial cells                   | EGA2-2 |       |       |
| Organization of muscle cells                               | EGA2-2 |       |       |
| Reprogramming of embryonic cell lines                      | EGA2-2 |       |       |
| Quantity of ribosome                                       | EGA2-2 |       |       |
| Killing of Staphylococcus aureus subsp. aureus str. Newman | EGA2-2 | CTSV  |       |
| Stimulation of CD8+ T lymphocyte                           | EGA2-2 |       |       |
| Oxidative stress response of tumor cell lines              | EGA2-2 |       |       |
| S phase of carcinoma cell lines                            | EGA2-2 |       |       |
| Stabilization of desmosomes                                | EGA2-2 |       |       |
| Generation of bilirubin                                    | EGA2-2 |       |       |

|                                                            |        |       |       |
|------------------------------------------------------------|--------|-------|-------|
| Deposition of vascular smooth muscle cells                 | EGA2-2 |       |       |
| Cell viability of endothelial cells                        | EGA2-2 | HSPA5 |       |
| Aneuploidy of ovarian cancer cell lines                    | EGA2-2 |       |       |
| Accumulation of vascular smooth muscle cells               | EGA2-2 |       |       |
| Quantity of lung cancer cell lines                         | EGA2-2 |       |       |
| Morphology of intercalated disks                           | EGA2-2 |       |       |
| Sealing of cellular membrane                               | EGA2-2 |       | LAMP1 |
| Double-stranded DNA break repair of cells                  | EGA2-2 |       |       |
| S phase of lung cancer cell lines                          | EGA2-2 |       |       |
| Apoptosis of gastric mucous cells                          | EGA2-2 |       |       |
| Dedifferentiation of gonadal cell lines                    | EGA2-2 |       |       |
| Permeability transition of mitochondria                    | EGA2-2 | HSPA5 |       |
| Dissociation of vesicles                                   | EGA2-2 |       |       |
| Synthesis of neurotransmitter                              | EGA2-2 |       |       |
| Outgrowth of dendrites                                     | EGA2-2 |       |       |
| Survival of smooth muscle cell lines                       | EGA2-2 |       |       |
| Binding of ribosome                                        | EGA2-2 | HSPA5 |       |
| Metabolism by kidney cell lines                            | EGA2-2 |       | EPCAM |
| Formation of hair follicle                                 | EGA2-2 | CTSV  |       |
| Alignment of actin filaments                               | EGA2-2 |       |       |
| Reorganization of cytoskeleton                             | EGA2-2 |       |       |
| Concentration of reactive oxygen species                   | EGA2-2 |       |       |
| Metabolism by epithelial cell lines                        | EGA2-2 |       | EPCAM |
| Cleavage of heme                                           | EGA2-2 |       |       |
| Maturation of bone marrow-derived immature dendritic cells | EGA2-2 |       |       |
| Maturation of myoblasts                                    | EGA2-2 |       |       |
| Cytokinesis of ovarian cancer cell lines                   | EGA2-2 |       |       |
| Formation of gamma H2AX nuclear focus                      | EGA2-2 |       |       |
| Arrest in differentiation of melanoma cell lines           | EGA2-2 | DPP4  |       |
| Injury of mitochondrial membrane                           | EGA2-2 |       |       |
| Radiosensitivity of tumor cell lines                       | EGA2-2 |       |       |
| Concentration of linoleic acid                             | EGA2-2 | HSPA5 |       |
| Quantity of prostatic duct                                 | EGA2-2 |       |       |
| Viability                                                  | EGA2-2 |       |       |
| Transport of calcifediol                                   | EGA2-2 |       |       |
| Translocation of chromosomes                               | EGA2-2 |       |       |
| Thickness of fibrous cap                                   | EGA2-2 |       |       |
| Proliferation of basal keratinocytes                       | EGA2-2 | CTSV  |       |
| Arrest in interphase of carcinoma cell lines               | EGA2-2 |       |       |
| Homeostasis of bilirubin                                   | EGA2-2 |       |       |
| Conversion of heme                                         | EGA2-2 |       |       |
| Oxidation of heme                                          | EGA2-2 |       |       |
| Secretion of taurocholic acid                              | EGA2-2 |       |       |
| Differentiation of prostatic tissue                        | EGA2-2 |       |       |
| Phosphorylation of glucose-6-phosphate                     | EGA2-2 |       |       |
| Dedifferentiation of ovarian cancer cell lines             | EGA2-2 |       |       |
| Survival of heart                                          | EGA2-2 |       |       |

|                                                           |        |        |
|-----------------------------------------------------------|--------|--------|
| Quantity of keratin intermediate filaments                | EGA2-2 |        |
| Formation of desmosomes                                   | EGA2-2 |        |
| Morphology of myofibrils                                  | EGA2-2 |        |
| Cell-cell adhesion of keratinocyte cancer cell lines      | EGA2-2 |        |
| Uptake of calcifediol                                     | EGA2-2 |        |
| Reprogramming of embryonic stem cell lines                | EGA2-2 |        |
| Differentiation of embryonic tissue                       | EGA2-4 |        |
| Cell death of ovarian cancer cell lines                   | EGA2-4 |        |
| Invasion of stomach cancer cell lines                     | EGA2-4 |        |
| Mitochondrial membrane potential                          | EGA2-4 |        |
| Opening of permeability transition pores                  | EGA2-4 |        |
| Uptake of D-glucose                                       | EGA2-4 | SLC2A1 |
| Invasion of fibroblast cell lines                         | EGA2-4 |        |
| Formation of pseudopodia                                  | EGA2-4 | AHNAK  |
| Epithelial-mesenchymal transition of melanoma cell lines  | EGA2-4 | AHNAK  |
| Secretion of lactic acid                                  | EGA2-4 | SLC2A1 |
| Recruitment of vascular smooth muscle cells               | EGA2-4 |        |
| Dynamics of actin cytoskeleton                            | EGA2-4 | AHNAK  |
| Activation of heart                                       | EGA2-4 | SLC2A1 |
| Apoptosis of B-lymphocyte derived cell lines              | EGA2-4 | SLC2A1 |
| Invasion of rhabdomyosarcoma cell lines                   | EGA2-4 | SLC2A1 |
| Transport of D-glucose                                    | EGA2-4 | SLC2A1 |
| Quantity of colorectal cancer cell lines                  | EGA2-4 |        |
| Expansion of natural killer cells                         | EGA2-4 |        |
| Glycolysis of leukocyte cell lines                        | EGA2-4 | SLC2A1 |
| Remodeling of heart                                       | EGA2-4 |        |
| Function of left ventricle                                | EGA2-4 | SLC2A1 |
| Transport of dehydroascorbic acid                         | EGA2-4 | SLC2A1 |
| Cell viability of germ cell tumor cell lines              | EGA2-4 |        |
| Formation of kidney                                       | EGA2-4 |        |
| Dilation of left ventricle                                | EGA2-4 | SLC2A1 |
| Cell death of heart tissue                                | EGA2-4 |        |
| Glycolysis of lung cancer cell lines                      | EGA2-4 | SLC2A1 |
| Development of sensory organ                              | EGA2-4 |        |
| Development of interventricular sulcus                    | EGA2-4 |        |
| Sudden death                                              | EGA2-4 |        |
| Arrest in cell cycle progression of fibroblast cell lines | EGA2-4 | AHNAK  |
| Formation of utricle                                      | EGA2-4 |        |
| Development of lateral plate mesoderm                     | EGA2-4 |        |
| Metabolism of lamivudine                                  | EGA2-4 | PGK1   |
| Formation of pulmonary alveolus                           | EGA2-4 |        |
| Transport of galactose                                    | EGA2-4 | SLC2A1 |
| Fragility of epidermis                                    | EGA2-4 |        |
| Transmembrane potential of mitochondria                   | EGA2-4 |        |
| Uptake of 2-deoxyglucose                                  | EGA2-4 | SLC2A1 |
| Apoptosis of germ cell tumor cell lines                   | EGA2-4 |        |

|                                                                 |        |                           |            |        |                  |
|-----------------------------------------------------------------|--------|---------------------------|------------|--------|------------------|
| Modulation of D-glucose                                         | EGA2-4 | SLC2A1                    |            |        |                  |
| Apoptosis of embryonic stem cells                               | EGA2-4 | SLC2A1                    |            |        |                  |
| Development of trophoblast cells                                | EGA2-4 |                           |            |        |                  |
| Cell death of thymocytes                                        | EGA2-4 |                           |            |        |                  |
| Differentiation of ectoderm                                     | EGA2-4 |                           |            |        |                  |
| Permeability of epidermis                                       | EGA2-4 |                           |            |        |                  |
| Organization of podocytes                                       | EGA2-4 |                           |            |        |                  |
| Epithelial-mesenchymal transition of prostate cancer cell lines | EGA2-4 | AHNAK                     |            |        |                  |
| Epithelial-mesenchymal transition of fibrosarcoma cell lines    | EGA2-4 | AHNAK                     |            |        |                  |
| Transport of mannose                                            | EGA2-4 | SLC2A1                    |            |        |                  |
| Colony formation of stomach cancer cell lines                   | EGA2-4 |                           |            |        |                  |
| Formation of renal glomerulus                                   | EGA2-4 |                           |            |        |                  |
| Activation of hepatic stellate cells                            | EGA3-1 | IL1A, IL6, LGALS3         | IL6        | LGALS3 | IL6              |
| Synthesis of purine nucleotide                                  | EGA3-1 | IL6, PINK1                | IL6        |        | IL6              |
| Proliferation of multilineage progenitor cells                  | EGA3-1 | IL6                       | IL6        |        | IL6              |
| Lifespan of organism                                            | EGA3-1 | CEBPB, LAMB1, NPC2        |            |        | CEBPB            |
| Autophagy                                                       | EGA3-1 | CEBPB, IL6, PINK1         | IL6        | TRIB3  | CEBPB, IL6       |
| Apoptosis of heart                                              | EGA3-1 | IL6                       | IL6        |        | IL6              |
| Apoptosis of leukocyte cell lines                               | EGA3-1 | CEBPB, ERBB2, IL6, LGALS3 | ERBB2, IL6 | LGALS3 | CEBPB, IL6       |
| Maturation of dendritic cells                                   | EGA3-1 | ELF3, IL1A, IL6           | ELF3, IL6  |        | IL6              |
| Apoptosis of hematopoietic cell lines                           | EGA3-1 | CEBPB, ERBB2, IL6, LGALS3 | ERBB2, IL6 | LGALS3 | CEBPB, IL6       |
| Synthesis of ATP                                                | EGA3-1 | IL6, PINK1                | IL6        |        | IL6              |
| Apoptosis of central nervous system cells                       | EGA3-1 |                           |            |        |                  |
| Secretion of fatty acid                                         | EGA3-1 | ACSL4, IL1A, NPC2         |            |        |                  |
| Oxidation of long chain fatty acid                              | EGA3-1 | ACSL4, IL6                | IL6        | ACOX1  | IL6              |
| Osteoclastogenesis of leukocytes                                | EGA3-1 | IL1A, IL6                 | IL6        |        | IL6              |
| Growth of blastocyst                                            | EGA3-1 |                           |            |        | POU5F1           |
| Quantity of germ cells                                          | EGA3-1 | IL1A, IL6                 | IL6        |        | IL6              |
| Cell death of hematopoietic cell lines                          | EGA3-1 | CEBPB, ERBB2, IL6, LGALS3 | ERBB2, IL6 | LGALS3 | CEBPB, IL6       |
| Concentration of corticosterone                                 | EGA3-1 | IL1A, IL6                 | IL6        |        | IL6              |
| Cell death of kidney cancer cell lines                          | EGA3-1 | IL6                       | IL6        |        | IL6              |
| Lipolysis of lipid                                              | EGA3-1 | IL6                       | IL6        |        | IL6              |
| Entry into mitosis                                              | EGA3-1 |                           |            |        | POU5F1           |
| Concentration of acyl-coenzyme A                                | EGA3-1 |                           |            |        |                  |
| Transport of steroid                                            | EGA3-1 | IL6, NPC2                 | IL6        |        | IL6              |
| Quantity of breast cancer cell lines                            | EGA3-1 | ERBB2, IL6                | ERBB2, IL6 |        | IL6, POU5F1      |
| Secretion of prostaglandin E2                                   | EGA3-1 | ACSL4, IL1A, NPC2         |            |        |                  |
| Generation of reactive oxygen species                           | EGA3-1 | IL6, LGALS3, PINK1        | IL6        | LGALS3 | IL6              |
| Quantity of lactic acid                                         | EGA3-1 | ERBB2                     | ERBB2      |        |                  |
| Development of tumor cell lines                                 | EGA3-1 | CEBPB, ERBB2, IL6         | ERBB2, IL6 |        | CEBPB, FLNA, IL6 |
| Lipolysis                                                       | EGA3-1 | IL6, NPC2, PPP2R5A        | IL6        |        | IL6              |
| Cell death of myeloid cells                                     | EGA3-1 | CEBPB, IL6, LGALS3        | IL6        | LGALS3 | CEBPB, IL6       |
| Apoptosis of peritoneal macrophages                             | EGA3-1 | CEBPB, LGALS3             |            | LGALS3 | CEBPB            |
| Proliferation of antigen presenting cells                       | EGA3-1 | ERBB2, IL6, LGALS3        | ERBB2, IL6 | LGALS3 | IL6              |
| Quantity of anion                                               | EGA3-1 | IL1A, IL6                 | IL6        |        | IL6              |
| Osteoclastogenesis                                              | EGA3-1 | IL1A, IL6                 | IL6        |        | FLNA, IL6        |
| Apoptosis of granulocytes                                       | EGA3-1 | IL6                       | IL6        |        | IL6              |
| Concentration of glutathione                                    | EGA3-1 | ERBB2, IL1A, IL6, LGALS3  | ERBB2, IL6 | LGALS3 | IL6              |
| Quantity of reactive oxygen species                             | EGA3-2 | PTGS2                     |            |        |                  |
| Growth of organism                                              | EGA3-1 | CSE1L, ERBB2, GPD2, IL6   | ERBB2, IL6 | ACOX1  | IL6, POU5F1      |
| Activation of muscle cells                                      | EGA3-1 | IL1A, LGALS3, NPC2        |            | LGALS3 |                  |
| Expansion of myeloid cells                                      | EGA3-1 | ERBB2, IL1A, IL6          | ERBB2, IL6 |        | IL6              |
| Sensitivity of cells                                            | EGA3-1 | CLDN4, ERBB2              | ERBB2      |        |                  |
| Apoptosis of myeloid cells                                      | EGA3-1 | CEBPB, IL6, LGALS3        | IL6        | LGALS3 | CEBPB, IL6       |

|                                                           |        |                  |     |       |            |
|-----------------------------------------------------------|--------|------------------|-----|-------|------------|
| Cell death of motor neurons                               | EGA3-1 |                  |     |       |            |
| Growth of yeast                                           | EGA3-2 | LIG1             |     |       |            |
| Osteoclastogenesis of macrophages                         | EGA3-1 | IL1A, IL6        | IL6 |       | IL6        |
| Differentiation of adipocytes                             | EGA3-1 | CEBPB, IL6       | IL6 | TRIB3 | CEBPB, IL6 |
| Insulin sensitivity                                       | EGA3-1 |                  |     |       |            |
| Adipogenesis of adipocytes                                | EGA3-1 | CEBPB, IL6, NPC2 | IL6 |       | CEBPB, IL6 |
| Oxidation of long chain fatty acid                        | EGA3-2 |                  |     |       |            |
| Expression of prostaglandin E2                            | EGA3-2 | PTGS2            |     |       |            |
| Outgrowth of neuroblasts                                  | EGA3-2 | ITGA6            |     |       |            |
| Induction of multinucleated cells                         | EGA3-2 | PTGS2            |     |       |            |
| Delay in healing of tibia                                 | EGA3-2 | PTGS2            |     |       |            |
| Invasion by stromal cell lines                            | EGA3-2 | PTGS2            |     |       |            |
| Migration of stromal cell lines                           | EGA3-2 | PTGS2            |     |       |            |
| Synthesis of 12S-hydroxy-5Z 8E 10E-heptadecatrienoic acid | EGA3-2 | PTGS2            |     |       |            |
| Oxidation of oleic acid                                   | EGA3-2 |                  |     |       |            |
| Generation of eicosapentenoic acid                        | EGA3-2 | PTGS2            |     |       |            |
| Growth of Saccharomyces cerevisiae                        | EGA3-2 | LIG1             |     |       |            |
| Quantity of 11-dehydro-thromboxane B2                     | EGA3-2 | PTGS2            |     |       |            |
| Stimulation of renin angiotensin system                   | EGA3-2 | PTGS2            |     |       |            |
| Nucleation of cells                                       | EGA3-2 | RHOD             |     |       |            |
| Recruitment of stromal cells                              | EGA3-2 | PTGS2            |     |       |            |
| Concentration of phosphatidylserine                       | EGA3-2 | PTGS2            |     |       |            |
| Interphase of fibroblasts                                 | EGA3-2 | POLK             |     |       |            |
| Synthesis of 11(R)-HETE                                   | EGA3-2 | PTGS2            |     |       |            |
| Mutagenesis of embryonic stem cells                       | EGA3-2 | POLK             |     |       |            |
| Density of hair follicle                                  | EGA3-2 | PTGS2            |     |       |            |
| Homeostasis of rodents                                    | EGA3-2 | PTGS2            |     |       |            |
| Area of mammary alveolus                                  | EGA3-2 | USF2             |     |       |            |
| Assembly of lipoprotein                                   | EGA3-2 |                  |     |       |            |
| Proliferation of erythroblasts                            | EGA3-2 |                  |     |       |            |
| Apoptosis of uterine cell lines                           | EGA3-2 | PTGS2            |     |       |            |
| Interaction of Schwann cells                              | EGA3-2 | ITGA6            |     |       |            |
| Invasion by uterine cell lines                            | EGA3-2 | PTGS2            |     |       |            |
| Binding of skin cell lines                                | EGA3-2 | ITGA6            |     |       |            |
| Development of proamniotic cavity                         | EGA3-2 |                  |     |       |            |
| Cell spreading of connective tissue cells                 | EGA3-2 | RHOD             |     |       |            |
| Vascular permeability of ear                              | EGA3-2 | PTGS2            |     |       |            |
| Survival of uterine cell lines                            | EGA3-2 | PTGS2            |     |       |            |
| Colony formation of cervical cancer cell lines            | EGA3-2 | USF2             |     |       |            |
| Incidence of fibrous tissue                               | EGA3-2 | PTGS2            |     |       |            |
| Delay in organismal death                                 | EGA3-2 |                  |     |       |            |
| Survival of stromal cell lines                            | EGA3-2 | PTGS2            |     |       |            |
| Invasion of ovarian cancer cell lines                     | EGA3-2 | CLDN3, PTGS2     |     |       |            |
| Proliferation of vascular tissue                          | EGA3-2 | PTGS2            |     |       |            |
| Synthesis of prostaglandin G2                             | EGA3-2 | PTGS2            |     |       |            |
| Angiogenesis of stromal tissue                            | EGA3-2 | PTGS2            |     |       |            |
| Beta-oxidation of long chain fatty acid                   | EGA3-2 |                  |     |       |            |
| Mass of mammary gland tissue                              | EGA3-2 | USF2             |     |       |            |
| Stabilization of filopodia                                | EGA3-2 | ITGA6            |     |       |            |
| Ossification of cardiac muscle                            | EGA3-3 |                  |     |       |            |
| Morphology of neuromuscular junctions                     | EGA3-3 |                  |     |       |            |
| Quantity of postsynaptic membrane                         | EGA3-3 |                  |     |       |            |
| Ossification of skeletal muscle                           | EGA3-3 |                  |     |       |            |

|                                                      |        |
|------------------------------------------------------|--------|
| Morphology of myotendinous junctions                 | EGA3-3 |
| Infiltration by connective tissue cells              | EGA3-3 |
| Folding of postsynaptic membrane                     | EGA3-3 |
| Accumulation of intramyocellular lipid store         | EGA3-3 |
| Lipolysis of lipid                                   | EGA3-4 |
| Quantity of lactic acid                              | EGA3-4 |
| Development of tumor cell lines                      | EGA3-4 |
| Differentiation of adipocytes                        | EGA3-4 |
| Synthesis of cholesterol ester                       | EGA3-4 |
| Quantity of peroxisomes                              | EGA3-4 |
| Oxidation of palmitoyl-coenzyme A                    | EGA3-4 |
| Oxidation of oleic acid                              | EGA3-4 |
| Delay in organismal death                            | EGA3-4 |
| Invasion of ovarian cancer cell lines                | EGA3-4 |
| Utilization of D-glucose                             | EGA3-4 |
| Chemotaxis of vascular smooth muscle cells           | EGA3-4 |
| Synthesis of ketone body                             | EGA3-4 |
| Development of breast cell lines                     | EGA3-4 |
| Hydrolysis of protein                                | EGA3-4 |
| Steroidogenesis of hormone                           | EGA3-4 |
| Spermatogenesis                                      | EGA3-4 |
| Synthesis of glycerol                                | EGA3-4 |
| Quantity of mitochondrial cristae                    | EGA3-4 |
| Synthesis of hormone                                 | EGA3-4 |
| Colony formation of ovarian cancer cell lines        | EGA3-4 |
| Mitogenesis                                          | EGA3-4 |
| Secretion of cholesterol                             | EGA3-4 |
| Migration of bladder cancer cell lines               | EGA3-4 |
| Removal of cholesterol                               | EGA3-4 |
| Conversion of retinol                                | EGA3-4 |
| Size of peroxisomes                                  | EGA3-4 |
| Fragmentation of cells                               | EGA3-4 |
| Formation of testis                                  | EGA3-4 |
| Accumulation of stearic acid                         | EGA3-4 |
| Redistribution of phospholipid                       | EGA3-4 |
| Colony formation of fibroblasts                      | EGA3-4 |
| Quantity of carnitine                                | EGA3-4 |
| Secretion of leukotriene B4                          | EGA3-4 |
| Adipogenesis of triacylglycerol                      | EGA3-4 |
| Cell viability of eye cell lines                     | EGA3-4 |
| Synthesis of acylglycerol                            | EGA3-4 |
| Density of mitochondrial cristae                     | EGA3-4 |
| Accumulation of phosphatidylinositol 4 5-diphosphate | EGA3-4 |
| Regeneration of peripheral nerve                     | EGA3-4 |
| Behavior                                             | EGA3-4 |
| Concentration of testosterone                        | EGA3-4 |
| Apoptosis of lymphocytes                             | EGA3-4 |
| Elongation of neurites                               | EGA3-4 |
| Mass of epididymal fat                               | EGA3-4 |
| Mass of liver                                        | EGA3-4 |
| Accumulation of oleic acid                           | EGA3-4 |
| Ingestion by mice                                    | EGA3-4 |
| Cell movement of vascular smooth muscle cells        | EGA3-4 |
| Function of heart ventricle                          | EGA3-4 |

|                                                   |        |
|---------------------------------------------------|--------|
| Colony survival of lung cancer cell lines         | EGA3-4 |
| Formation of membrane blebs                       | EGA3-4 |
| Quantity of lipid peroxide                        | EGA3-4 |
| Formation of skin                                 | EGA3-4 |
| Proliferation of vascular smooth muscle cells     | EGA3-4 |
| Regulation of L-glutamic acid                     | EGA3-4 |
| Absorption of cholesterol                         | EGA3-4 |
| Catabolism of lipoprotein                         | EGA3-4 |
| Generation of superoxide                          | EGA3-4 |
| Accumulation of palmitic acid                     | EGA3-4 |
| Binding of DNA endogenous promoter                | EGA3-4 |
| Retention of phosphatidylinositol 4 5-diphosphate | EGA3-4 |
| Metabolism of terpenoid                           | EGA3-4 |
| Regulation of cholesterol                         | EGA3-4 |
| Quantity of segmented filamentous bacterium       | EGA3-4 |
| Mitogenesis of hepatocytes                        | EGA3-4 |
| Binding of NF-kappa B response element            | EGA3-4 |
| Differentiation of spermatogonia                  | EGA3-4 |
| Development of forelimb                           | EGA3-4 |
| Recovery of heart                                 | EGA3-4 |
| Synthesis of urea                                 | EGA3-4 |
| Ingestion of ethanol                              | EGA3-4 |
| Apoptosis of fibroblasts                          | EGA3-4 |
| Development of liver                              | EGA3-4 |
| Development of B lymphocytes                      | EGA3-4 |
| Formation of ketone body                          | EGA3-4 |
| Modification of chromatin                         | EGA3-4 |
| Concentration of cholesterol                      | EGA3-4 |
| Place preference                                  | EGA3-4 |
| Quantity of stratum corneum                       | EGA3-4 |
| G1/S phase transition of fibroblasts              | EGA3-4 |
| Function of peroxisomes                           | EGA3-4 |
| Transport of fatty acid                           | EGA3-4 |
| Size of atrium                                    | EGA3-4 |
| Breakdown of mitochondrial outer membrane         | EGA3-4 |
| Apoptosis of leukocytes                           | EGA3-4 |
| Oxidation of fat                                  | EGA3-4 |
| Function of mitochondria                          | EGA3-4 |
| Proliferation of peroxisomes                      | EGA3-4 |
| Excretion of sterol                               | EGA3-4 |
| Quantity of endothelial progenitor cells          | EGA3-4 |
| Development of breast cancer cell lines           | EGA3-4 |
| Secretion of triacylglycerol                      | EGA3-4 |
| Morphology of embryonic cell lines                | EGA3-4 |
| Homeostasis of lipid                              | EGA3-4 |
| Synthesis of tretinoin                            | EGA3-4 |
| Adipogenesis of liver                             | EGA3-4 |
| Regulation of triacylglycerol                     | EGA3-4 |
| Reorganization of actin                           | EGA3-4 |
| Trafficking of cells                              | EGA3-4 |
| Tubulogenesis of endothelial cell lines           | EGA3-4 |



|                                                    |        |       |     |       |
|----------------------------------------------------|--------|-------|-----|-------|
| Oxidation of 9-methylpentadecanoic acid            | EGA3-4 |       |     |       |
| Regulation of D-glucose                            | EGA3-4 |       |     |       |
| Apoptosis of bone marrow-derived mast cells        | EGA3-4 |       |     |       |
| Cycling of D-glucose                               | EGA3-4 |       |     |       |
| Binding of Ca <sup>2+</sup>                        | EGA3-4 |       |     |       |
| Accumulation of linoleic acid                      | EGA3-4 |       |     |       |
| Degradation of leukotriene B <sub>4</sub>          | EGA3-4 |       |     |       |
| Response of hepatocytes                            | EGA3-4 |       |     |       |
| Mass of adipose tissue                             | EGA3-4 |       |     |       |
| Generation of immunosuppressive regulatory B cells | EGA3-4 |       |     |       |
| Cocaine seeking behavior                           | EGA3-4 |       |     |       |
| Clustering of phosphatidylinositol 4 5-diphosphate | EGA3-4 |       |     |       |
| Nocifensive behavior                               | EGA3-4 |       |     |       |
| Tubulogenesis                                      | EGA3-4 |       |     |       |
| Quantity of actin cytoskeleton                     | EGA3-4 |       |     |       |
| Infiltration by lipid                              | EGA3-4 |       |     |       |
| Metabolism of amino acids                          | EGA3-4 |       |     |       |
| Morphology of fibroblast cell lines                | EGA3-4 |       |     |       |
| Metabolism by adipose tissue                       | EGA3-4 |       |     |       |
| Adipogenesis                                       | EGA3-4 |       |     |       |
| Uptake of bile salt                                | EGA3-4 |       |     |       |
| Conduction of heart                                | EGA3-4 |       |     |       |
| Excision repair                                    | EGA3-4 |       |     |       |
| Storage of lipid                                   | EGA3-4 |       |     |       |
| Production of taurocholic acid                     | EGA3-4 |       |     |       |
| Differentiation of eosinophils                     | EGA3-4 |       |     |       |
| Apoptosis of superior cervical ganglion neurons    | EGA3-4 |       |     |       |
| Synthesis of 2-arachidonoylglycerol                | EGA3-4 |       |     |       |
| Synthesis of testosterone                          | EGA3-4 |       |     |       |
| G1/S phase transition                              | EGA3-4 |       |     |       |
| Synthesis of lipoprotein                           | EGA3-4 |       |     |       |
| Development of endocrine region of pancreas        | EGA3-4 |       |     |       |
| Transport of mitochondria                          | EGA3-4 |       |     |       |
| G1/S phase transition of smooth muscle cells       | EGA3-4 |       |     |       |
| Cell viability of ovarian cancer cell lines        | EGA3-4 |       |     |       |
| Disappearance of D-glucose                         | EGA3-4 |       |     |       |
| Synthesis of carnitine                             | EGA3-4 |       |     |       |
| Development of digestive system                    | EGA3-4 |       |     |       |
| Esterification of cholesterol                      | EGA3-4 |       |     |       |
| Uptake of 9-methylpentadecanoic acid               | EGA3-4 |       |     |       |
| Delay in formation of stratum corneum              | EGA3-4 |       |     |       |
| Mass of fat pad                                    | EGA3-4 |       |     |       |
| Binding of AP1 response element                    | EGA3-4 |       |     |       |
| Tubulogenesis of endothelial cells                 | EGA3-4 |       |     |       |
| Differentiation of B lymphoblastoid cell lines     | EGA3-1 | IL6   | IL6 | IL6   |
| Function of gastrointestinal tract                 | EGA3-1 | IL6   | IL6 | IL6   |
| Necroptosis                                        | EGA3-1 |       |     |       |
| Quantity of stearyl-coenzyme A                     | EGA3-1 |       |     |       |
| Adipogenesis of lipid                              | EGA3-1 | CEBPB |     | CEBPB |

|                                                                 |        |                     |             |        |           |
|-----------------------------------------------------------------|--------|---------------------|-------------|--------|-----------|
| Desaturation of palmitoyl-coenzyme A                            | EGA3-1 |                     |             |        |           |
| Accumulation of anion                                           | EGA3-1 | IL6                 | IL6         |        | IL6       |
| Distribution of mitochondria                                    | EGA3-1 | PINK1               |             |        |           |
| Formation of basement membrane                                  | EGA3-1 | LAMB1               |             |        |           |
| Cleavage of protein binding site                                | EGA3-1 | CEBPB               |             |        | CEBPB     |
| Binding of AP1/CRE element                                      | EGA3-1 |                     |             |        |           |
| Recovery of ATP                                                 | EGA3-1 |                     |             |        |           |
| Diffusion of K+                                                 | EGA3-1 |                     |             |        |           |
| Synthesis of cholesterol ester                                  | EGA3-1 |                     |             |        |           |
| Quantity of 1-palmitoyl-2-linoleoyl-sn-glycero-3-phosphocholine | EGA3-1 |                     |             | LPCAT3 |           |
| Clathrin mediated endocytosis by breast cancer cell lines       | EGA3-1 | ERBB2               | ERBB2       |        |           |
| DNA damage response of breast cell lines                        | EGA3-1 |                     |             |        |           |
| Desaturation of stearoyl-coenzyme A                             | EGA3-1 |                     |             |        |           |
| Secretion of sterol                                             | EGA3-1 |                     |             | LPCAT3 |           |
| Morphology of epithelial cells                                  | EGA3-1 | ERBB2               | ERBB2       |        | POU5F1    |
| Quantity of megakaryocytes                                      | EGA3-1 | IL1A                |             |        | FLNA      |
| Binding of breast cell lines                                    | EGA3-1 | ELF3, ERBB2, LGALS3 | ELF3, ERBB2 | LGALS3 |           |
| Thrombopoiesis                                                  | EGA3-1 | IL1A, IL6           | IL6         |        | FLNA, IL6 |
| Development of germinal center                                  | EGA3-1 |                     |             |        |           |
| Concentration of long chain fatty acid                          | EGA3-1 |                     |             |        |           |
| Conversion of L-proline                                         | EGA3-1 |                     |             | OAT    |           |
| Growth of focal adhesions                                       | EGA3-1 |                     |             |        | FLNA      |
| Glycogenolysis                                                  | EGA3-1 | CEBPB               |             |        | CEBPB     |
| Lipolysis of fatty acid                                         | EGA3-1 | IL6                 | IL6         |        | IL6       |
| Expansion of myeloid progenitor cells                           | EGA3-1 | IL6                 | IL6         |        | IL6       |
| Initiation of cell movement of neurons                          | EGA3-1 |                     |             |        | FLNA      |
| Sensitivity of connective tissue cells                          | EGA3-1 |                     |             |        |           |
| Entry into mitosis of tumor cell lines                          | EGA3-1 |                     |             |        | POU5F1    |
| Stimulation of synovial cells                                   | EGA3-1 | IL1A, IL6           | IL6         |        | IL6       |
| Concentration of 18:1(n-9) fatty acids                          | EGA3-1 |                     |             |        |           |
| Polarity of epithelial cells                                    | EGA3-1 | ERBB2               | ERBB2       |        |           |
| Development of pancreatic cancer cell lines                     | EGA3-1 | CEBPB               |             |        | CEBPB     |
| Distribution of bladder cancer cell lines                       | EGA3-1 |                     |             |        | POU5F1    |
| Quantity of S-adenosylmethionine                                | EGA3-1 | SHMT1               |             |        |           |
| Recovery of hematopoietic cells                                 | EGA3-1 | IL6                 | IL6         |        | IL6       |
| Stimulation of steroid                                          | EGA3-1 | IL1A, IL6           | IL6         |        | IL6       |
| Cell spreading of fibrosarcoma cell lines                       | EGA3-1 |                     |             |        | FLNA      |
| Senescence of breast cancer cell lines                          | EGA3-1 | ERBB2               | ERBB2       |        |           |
| Concentration of glycerol                                       | EGA3-1 | GPD2                |             |        |           |
| Regulation of connective tissue cells                           | EGA3-1 | ERBB2               | ERBB2       |        |           |
| Binding of cAMP response element                                | EGA3-1 | CEBPB, ERBB2        | ERBB2       |        | CEBPB     |
| Accumulation of tetracosahexaenoic acid                         | EGA3-1 |                     |             | ACOX1  |           |
| Quantity of nitrite                                             | EGA3-1 | IL1A, IL6           | IL6         |        | IL6       |
| Quantity of fat                                                 | EGA3-1 |                     |             |        |           |
| Arrest in G1 phase of melanoma cell lines                       | EGA3-1 | IL1A, IL6           | IL6         |        | IL6       |
| Cell-cell contact of synovial cells                             | EGA3-1 | IL6                 | IL6         |        | IL6       |
| Activation of tamoxifen                                         | EGA3-1 | ERBB2               | ERBB2       |        |           |
| Invasion of intestinal cell lines                               | EGA3-1 | IL6                 | IL6         |        | IL6       |
| Self-renewal of embryonic stem cells                            | EGA3-1 |                     |             |        | POU5F1    |
| Incorporation of phosphatidylinositol                           | EGA3-1 | ACSL4               |             |        |           |

|                                                      |        |              |       |        |             |
|------------------------------------------------------|--------|--------------|-------|--------|-------------|
| Initiation of migration of leukemia cell lines       | EGA3-1 |              |       |        | FLNA        |
| Function of gonad                                    | EGA3-1 | CEBPB, IL6   | IL6   |        | CEBPB, IL6  |
| Sensitivity of fibroblast cell lines                 | EGA3-1 | CLDN4        |       |        |             |
| Quantity of peroxisomes                              | EGA3-1 |              |       | ACOX1  |             |
| Oxidation of palmitoyl-coenzyme A                    | EGA3-1 |              |       | ACOX1  |             |
| Desaturation of palmitoleic acid                     | EGA3-1 |              |       |        |             |
| Efficiency of neuromuscular junctions                | EGA3-1 | ERBB2        | ERBB2 |        |             |
| Delay in S phase of fibroblasts                      | EGA3-1 |              |       |        |             |
| Cell spreading of skin cancer cell lines             | EGA3-1 | ERBB2        | ERBB2 |        | SDC4        |
| Induction of CD4+ T-lymphocytes                      | EGA3-1 | IL6          | IL6   |        | IL6         |
| Apoptosis of stria vascularis cells                  | EGA3-1 |              |       |        |             |
| Transduction of cells                                | EGA3-1 | IL6          | IL6   |        | IL6, POU5F1 |
| Modification of long-chain acyl-coenzyme A           | EGA3-1 |              |       | ACOX1  |             |
| Fragmentation of genomic DNA                         | EGA3-1 | IL6          | IL6   |        | IL6         |
| Formation of asters                                  | EGA3-1 | CSE1L        |       |        |             |
| Quantity of palmitoyl-coenzyme A                     | EGA3-1 |              |       |        |             |
| Conversion of L-amino acid                           | EGA3-1 |              |       | OAT    |             |
| Autophagy of mitochondria                            | EGA3-1 | PINK1        |       |        |             |
| Closure of embryonic tissue                          | EGA3-1 | SHMT1        |       |        | SDC4        |
| Arrest in mitosis                                    | EGA3-1 | CSE1L        |       |        | CCT4        |
| Stimulation of fibroblasts                           | EGA3-1 | IL1A, LGALS3 |       | LGALS3 | POU5F1      |
| Cardiovascular toxicity property of trastuzumab      | EGA3-1 | ERBB2        | ERBB2 |        |             |
| Expansion of granulocytes                            | EGA3-1 | IL6          | IL6   |        | IL6         |
| Regulation of hormone                                | EGA3-1 |              |       |        |             |
| Hypermaturation of dendritic cells                   | EGA3-1 | ELF3         | ELF3  |        |             |
| Cell spreading of RPE cells                          | EGA3-1 | LGALS3       |       | LGALS3 |             |
| Dedifferentiation of trophectoderm cells             | EGA3-1 |              |       |        | POU5F1      |
| Angiogenesis of brain                                | EGA3-1 | IL6          | IL6   |        | IL6         |
| Stimulation of hepatoma cell lines                   | EGA3-1 | IL1A, IL6    | IL6   |        | IL6         |
| Glomerular filtration rate of kidney                 | EGA3-1 |              |       |        |             |
| Quantity of Cajal-Retzius neurons                    | EGA3-1 | APLP2        |       |        | APLP2       |
| Apoptosis of endometrial cells                       | EGA3-1 | CEBPB        |       |        | CEBPB       |
| Color of bile                                        | EGA3-1 | IL6          | IL6   |        | IL6         |
| Aggregation of F-actin                               | EGA3-1 | SHROOM3      |       |        |             |
| Quantity of monounsaturated fatty acids              | EGA3-1 |              |       |        |             |
| Activation of enteric neurons                        | EGA3-1 | IL6          | IL6   |        | IL6         |
| Hydrolysis of fatty acid                             | EGA3-1 | IL6          | IL6   |        | IL6         |
| Activation of adenohipophysis                        | EGA3-1 | IL6          | IL6   |        | IL6         |
| Double-stranded DNA break repair of tumor cell lines | EGA3-1 |              |       |        |             |
| Defasciculation of motor nerve                       | EGA3-1 | ERBB2        | ERBB2 |        |             |
| Concentration of malonyl-coenzyme A                  | EGA3-1 |              |       |        |             |
| Accumulation of primary spermatocytes                | EGA3-1 |              |       |        |             |
| Dispersal of nuclear bodies                          | EGA3-1 |              |       |        |             |
| Binding of p53 response element                      | EGA3-1 | CEBPB        |       |        | CEBPB       |
| Cell cycle progression of neurons                    | EGA3-1 |              |       |        | FLNA        |
| Development of induced pluripotent stem cells        | EGA3-1 |              |       |        | POU5F1      |
| Cell division of hepatocytes                         | EGA3-1 |              |       |        |             |
| Onset of cell death                                  | EGA3-1 |              |       |        |             |
| Survival of hepatic stellate cells                   | EGA3-1 | IL6          | IL6   |        | IL6         |
| Stimulation of prostaglandin                         | EGA3-1 | IL1A, IL6    | IL6   |        | IL6         |
| Binding of C/EBP binding site                        | EGA3-1 | CEBPB, IL6   | IL6   | TRIB3  | CEBPB, IL6  |

|                                                    |        |                    |            |        |            |
|----------------------------------------------------|--------|--------------------|------------|--------|------------|
| Activation-induced cell death of CD8+ T lymphocyte | EGA3-1 | IL1A, IL6          | IL6        |        | IL6        |
| Proliferation of microglia                         | EGA3-1 | ERBB2, IL6, LGALS3 | ERBB2, IL6 | LGALS3 | IL6        |
| Cytotoxicity of fibroblasts                        | EGA3-1 |                    |            |        |            |
| Downregulation of steroid                          | EGA3-1 |                    |            |        |            |
| Differentiation of Th22 cells                      | EGA3-1 | IL6                | IL6        |        | IL6        |
| Fat body mass                                      | EGA3-1 | IL6                | IL6        |        | IL6        |
| Morphology of trabecula                            | EGA3-1 | IL6                | IL6        |        | IL6        |
| Stimulation of prostaglandin E2                    | EGA3-1 | IL1A               |            |        |            |
| Ovulation of ovary                                 | EGA3-1 | CEBPB, IL6         | IL6        |        | CEBPB, IL6 |
| Release of steroid hormone                         | EGA3-1 | IL1A               |            |        |            |
| G2 phase of fibroblasts                            | EGA3-1 |                    |            |        |            |
| Incorporation of arachidonic acid                  | EGA3-1 | ACSL4              |            |        |            |
| Development of muscle spindle                      | EGA3-1 | ERBB2              | ERBB2      |        |            |
| Synthesis of sphinganine                           | EGA3-1 |                    |            |        |            |
| Development of peripheral blood leukocytes         | EGA3-1 | IL6                | IL6        |        | IL6        |
| Activation of hypothalamic neurons                 | EGA3-1 |                    |            |        |            |
| Downregulation of norepinephrine                   | EGA3-1 | IL6                | IL6        |        | IL6        |
| Attachment of RPE cells                            | EGA3-1 | LGALS3             |            | LGALS3 |            |
| Incorporation of carbohydrate                      | EGA3-1 | ACSL4              |            |        |            |
| Cellular infiltration by inflammatory monocytes    | EGA3-1 | IL6                | IL6        |        | IL6        |
| Conversion of choline                              | EGA3-1 | CHDH               |            |        |            |
| Accumulation of fatty acid                         | EGA3-1 |                    |            | ACOX1  |            |
| Activation of smooth muscle cells                  | EGA3-1 | IL1A, NPC2         |            |        |            |
| Delamination of neural crest cells                 | EGA3-1 |                    |            |        |            |
| Concentration of glycine                           | EGA3-1 | ERBB2              | ERBB2      |        |            |
| Proliferation of plasma cells                      | EGA3-1 | IL6                | IL6        |        | IL6        |
| Contraction of ventricular myocytes                | EGA3-1 |                    |            |        |            |
| Turnover of bone                                   | EGA3-1 | IL6                | IL6        |        | IL6        |
| Arrest in mitosis of cervical cancer cell lines    | EGA3-1 | CSE1L              |            |        | CCT4       |
| Segregation of cells                               | EGA3-1 | APLP2              |            |        | APLP2      |
| Cell viability of bone marrow stromal cells        | EGA3-1 |                    |            |        |            |
| Cytotoxicity of fibroblast cell lines              | EGA3-1 | ERBB2              | ERBB2      |        |            |
| Proliferation of trophoblast cells                 | EGA3-1 |                    |            |        | POU5F1     |
| Glycogenolysis of liver                            | EGA3-1 |                    |            |        |            |
| Morphology of stomach cancer cell lines            | EGA3-1 |                    |            |        | POU5F1     |
| Clearance of Trypanosoma cruzi Tulahuen strain     | EGA3-1 | LGALS3             |            | LGALS3 |            |
| Cell cycle progression of cortical neurons         | EGA3-1 |                    |            |        |            |
| Accumulation of asialo GM2 ganglioside             | EGA3-1 | NPC2               |            |        |            |
| Weakness of hindlimb                               | EGA3-1 | IL6                | IL6        |        | IL6        |
| Morphology of mitochondria                         | EGA3-1 | PINK1              |            |        |            |
| Interconnectivity of mitochondria                  | EGA3-1 | PINK1              |            |        |            |
| Regulation of regulatory T lymphocytes             | EGA3-1 | IL6                | IL6        |        | IL6        |
| Conversion of coenzyme A                           | EGA3-1 |                    |            |        |            |
| Migration of colon carcinoma cells                 | EGA3-1 | IL6                | IL6        |        | IL6        |
| Closure of neural tube                             | EGA3-1 | SHMT1              |            |        | SDC4       |
| Accumulation of palmitoleic acid                   | EGA3-1 |                    |            |        |            |
| Transcytosis                                       | EGA3-1 |                    |            |        | FLNA       |
| Synthesis of phosphatidylethanolamine              | EGA3-1 |                    |            |        |            |
| Bone mineral density of trabecula                  | EGA3-1 |                    |            |        |            |
| Ruffling of cell periphery                         | EGA3-1 |                    |            |        | FLNA       |

|                                                    |        |                                             |              |                  |      |            |
|----------------------------------------------------|--------|---------------------------------------------|--------------|------------------|------|------------|
| Desaturation of palmitic acid                      | EGA3-1 |                                             |              |                  |      |            |
| Activation of vagus nerve                          | EGA3-1 |                                             |              |                  |      |            |
| Daytime core body temperature                      | EGA3-1 |                                             |              |                  |      |            |
| Orientation of cells                               | EGA3-1 | CSE1L, IL1A, IL6                            | IL6          |                  |      | IL6, SDC4  |
| Migration of tumor cells                           | EGA3-1 | CSE1L, DSG2, ERBB2, IL6,<br>LGALS3          | ERBB2, IL6   | LGALS3           |      | IL6        |
| Hydrolysis of lipid                                | EGA3-1 | IL6                                         | IL6          |                  |      | IL6        |
| Autophagy of cells                                 | EGA3-1 | CEBPB, IL6, PINK1                           | IL6          | TRIB3            |      | CEBPB, IL6 |
| Release of carbohydrate                            | EGA3-1 | IL1A, IL6                                   | IL6          |                  |      | IL6        |
| Growth of organism                                 | EGA3-2 | ITGA6, LIG1, PTGS2, USF2                    |              |                  |      |            |
| Growth of uterus                                   | EGA3-1 | CEBPB                                       |              |                  |      | CEBPB      |
| Activation of brain                                | EGA3-1 | IL6, WWC1                                   | IL6          |                  |      | IL6        |
| Release of glycerol                                | EGA3-1 | IL6                                         | IL6          |                  |      | IL6        |
| Metabolism of carbohydrate                         | EGA4-1 | DUSP6, NFKB1                                | NFKB1        | IGF1, SLC37A4    | SPP1 |            |
| Synthesis of carbohydrate                          | EGA4-1 | DUSP6, NFKB1                                | NFKB1        | IGF1, SLC37A4    | SPP1 |            |
| Activation of blood cells                          | EGA4-1 | HSPB8, NFKB1, PTGES                         | NFKB1        | CD63, IGF1       | SPP1 |            |
| Fatty acid metabolism                              | EGA4-1 | ABCG2, DECR1, EPHX2, FOXA1,<br>NFKB1, PTGES | NFKB1        | IGF1, UGCG       |      |            |
| Differentiation of central nervous<br>system cells | EGA4-1 |                                             |              | IGF1             |      |            |
| Cell movement of hepatoma cell lines               | EGA4-1 | SPARC                                       |              | IGF1             | SPP1 |            |
| Activation of myeloid cells                        | EGA4-1 | PTGES                                       |              | CD63, IGF1       | SPP1 |            |
| Stimulation of cells                               | EGA4-1 | PTGES                                       |              | IGF1             | SPP1 |            |
| Synthesis of D-glucose                             | EGA4-1 | DUSP6, NFKB1                                | NFKB1        | SLC37A4          |      |            |
| Transport of carboxylic acid                       | EGA4-1 | ABCG2                                       |              | IGF1, SLCO2B1    |      |            |
| Quantity of neurites                               | EGA4-1 |                                             |              | IGF1             | MYO6 |            |
| Differentiation of brain cells                     | EGA4-1 |                                             |              | IGF1             |      |            |
| Release of metal                                   | EGA4-1 |                                             |              | IGF1             | SPP1 |            |
| Quantity of blood vessel                           | EGA4-1 | SPARC                                       |              |                  |      |            |
| Quantity of bone cells                             | EGA4-1 | NFKB1, SPARC                                | NFKB1        | IGF1             | SPP1 |            |
| Proliferation of chondrocytes                      | EGA4-1 | NFKB1                                       | NFKB1        | IGF1             |      |            |
| Branching of axons                                 | EGA4-1 |                                             |              | UGCG             |      |            |
| Cell movement of leukocytes                        | EGA4-1 | EPHX2, NFKB1, PTGES, SPARC,<br>TIMP3        | NFKB1, TIMP3 | CD63, QPCT       | SPP1 |            |
| Axonogenesis                                       | EGA4-1 |                                             |              | IGF1, UGCG       |      |            |
| Cell movement of blood cells                       | EGA4-1 | EPHX2, NFKB1, PTGES, SPARC,<br>TIMP3        | NFKB1, TIMP3 | CD63, IGF1, QPCT | SPP1 |            |
| Cell movement of endothelial cells                 | EGA4-1 | SPARC, TIMP3                                | TIMP3        | CD63, IGF1       | SPP1 |            |
| Quantity of lymphocytes                            | EGA4-1 | ABCG2, EPHX2, NFKB1, PSMB9                  | NFKB1        | IGF1             | SPP1 |            |
| Quantity of connective tissue cells                | EGA4-1 | NFKB1, SPARC                                | NFKB1        | IGF1, UGCG       | SPP1 |            |
| Phosphorylation of protein                         | EGA4-1 |                                             |              | IGF1             | SPP1 |            |
| Cell viability of central nervous system<br>cells  | EGA4-1 | HSPB8                                       |              | IGF1             |      |            |
| Transport of ion                                   | EGA4-1 |                                             |              | IGF1, SLCO2B1    |      |            |
| Cellular infiltration by leukocytes                | EGA4-1 | EPHX2, NFKB1, PTGES, SPARC,<br>TIMP3        | NFKB1, TIMP3 |                  | SPP1 |            |
| Transport of cation                                | EGA4-1 |                                             |              | IGF1             |      |            |
| Quantity of lymphatic system cells                 | EGA4-1 | ABCG2, EPHX2, NFKB1, PSMB9                  | NFKB1        | IGF1             | SPP1 |            |
| Quantity of glycosylceramide                       | EGA4-1 |                                             |              | IGF1, UGCG       |      |            |
| Chemotaxis of myeloid cells                        | EGA4-1 |                                             |              |                  | SPP1 |            |
| Quantity of glycosphingolipid                      | EGA4-1 | ABCG2                                       |              | IGF1, UGCG       |      |            |
| Limb development                                   | EGA4-1 |                                             |              | IGF1             |      |            |
| Tyrosine phosphorylation of protein                | EGA4-1 |                                             |              | IGF1             | SPP1 |            |
| Cell movement of myeloid cells                     | EGA4-1 | EPHX2, PTGES, TIMP3                         | TIMP3        | QPCT             | SPP1 |            |
| Growth of limb                                     | EGA4-1 |                                             |              | IGF1             |      |            |
| Fusion of vesicles                                 | EGA4-1 | LAMP2                                       |              |                  | SPP1 |            |
| Cell viability of connective tissue cells          | EGA4-1 | NFKB1, PDCD4                                | NFKB1        | IGF1             | SPP1 |            |
| Quantity of mononuclear leukocytes                 | EGA4-1 | ABCG2, EPHX2, NFKB1, PSMB9                  | NFKB1        | IGF1             | SPP1 |            |
| Migration of prostate cancer cell lines            | EGA4-1 |                                             |              | IGF1             |      |            |
| Differentiation of oligodendrocytes                | EGA4-1 |                                             |              | IGF1             |      |            |

|                                              |        |                                   |              |            |            |
|----------------------------------------------|--------|-----------------------------------|--------------|------------|------------|
| Binding of fibroblast cell lines             | EGA4-1 |                                   |              | IGF1       | SPP1       |
| Quantity of smooth muscle cells              | EGA4-1 | PTGES, TIMP3                      | TIMP3        | IGF1       |            |
| Cell viability of brain cells                | EGA4-1 | HSPB8                             |              | IGF1       |            |
| Cellular infiltration by blood cells         | EGA4-1 | EPHX2, NFKB1, PTGES, SPARC, TIMP3 | NFKB1, TIMP3 |            | SPP1       |
| Quantity of filaments                        | EGA4-1 |                                   |              |            | RTKN, SPP1 |
| Homeostasis of ion                           | EGA4-1 | NFKB1                             | NFKB1        | IGF1       |            |
| Quantity of actin filaments                  | EGA4-1 |                                   |              |            | RTKN, SPP1 |
| Cellular infiltration                        | EGA4-1 | EPHX2, NFKB1, PTGES, SPARC, TIMP3 | NFKB1, TIMP3 |            | SPP1       |
| Metabolism of hydrogen peroxide              | EGA4-1 | ABCG2                             |              |            |            |
| Cell death of eye cells                      | EGA4-1 | TIMP3                             | TIMP3        | IGF1       |            |
| Accumulation of glycosphingolipid            | EGA4-1 |                                   |              | UGCG       |            |
| Quantity of cerebroside                      | EGA4-1 |                                   |              | IGF1, UGCG |            |
| Quantity of muscle                           | EGA4-1 | PTGES, TIMP3                      | TIMP3        | IGF1       |            |
| Accumulation of carbohydrate                 | EGA4-1 |                                   |              | SLC37A4    |            |
| Apoptosis of bone marrow cell lines          | EGA4-1 | PLAC8                             |              | IGF1       |            |
| Binding of endothelial cells                 | EGA4-1 | SPARC, TIMP3                      | TIMP3        | CD63       | SPP1       |
| Accumulation of polysaccharide               | EGA4-1 |                                   |              | SLC37A4    |            |
| Cell death of retinal cells                  | EGA4-1 | TIMP3                             | TIMP3        | IGF1       |            |
| Transport of metal                           | EGA4-1 |                                   |              | IGF1       |            |
| Cell movement of epithelial cell lines       | EGA4-1 | NFKB1                             | NFKB1        | IGF1       | SPP1       |
| Quantity of antigen presenting cells         | EGA4-1 | EPHX2, NFKB1                      | NFKB1        | IGF1       | SPP1       |
| Colony formation of breast cancer cell lines | EGA4-1 | DUSP6, SPARC                      |              |            | SPP1       |
| Quantity of brain cells                      | EGA4-1 | HSPB8                             |              | IGF1       |            |
| Apoptosis of pheochromocytoma cell lines     | EGA4-1 |                                   |              | IGF1       |            |
| Cellular infiltration by lymphocytes         | EGA4-1 | NFKB1, PTGES, SPARC, TIMP3        | NFKB1, TIMP3 |            |            |
| Signaling of cells                           | EGA4-1 | SPARC                             |              | IGF1       |            |
| Steroid metabolism                           | EGA4-1 | FOXA1                             |              | IGF1       | CYP51A1    |
| Proliferation of brain cells                 | EGA4-1 |                                   |              | IGF1       |            |
| Morphology of mesangial cells                | EGA4-1 | SPARC                             |              | IGF1       |            |
| Synthesis of cartilage matrix                | EGA4-1 |                                   |              | IGF1       |            |
| Accumulation of ganglioside                  | EGA4-1 |                                   |              |            |            |
| Morphology of muscle                         | EGA4-1 | FZD4, HSPB8, NFKB1, PTGES         | NFKB1        | IGF1       | SPP1       |
| Dissemination of prostate cancer cell lines  | EGA4-1 |                                   |              | IGF1       |            |
| Release of cholesterol                       | EGA4-1 |                                   |              |            |            |
| Mass of skeletal muscle                      | EGA4-1 | FZD4                              |              | IGF1       | SPP1       |
| Morphology of vessel                         | EGA4-1 | PTGES                             |              | IGF1       | SPP1       |
| Excitation of neurons                        | EGA4-1 |                                   |              | IGF1       |            |
| Neurogenesis of hippocampus                  | EGA4-1 | HSPB8                             |              | IGF1       |            |
| Formation of cochlear duct                   | EGA4-1 |                                   |              | IGF1       |            |
| Morphology of gland                          | EGA4-1 | EPHX2                             |              | IGF1       |            |
| Development of chondrocytes                  | EGA4-1 |                                   |              |            |            |
| Migration of multiple myeloma cells          | EGA4-1 |                                   |              | IGF1       | SPP1       |
| Inhibition of mRNA                           | EGA4-1 |                                   |              | IGF1       |            |
| Morphology of bone                           | EGA4-1 |                                   |              | IGF1       | SPP1       |
| Morphology of blood vessel                   | EGA4-1 | PTGES                             |              | IGF1       | SPP1       |
| Distribution of lipid                        | EGA4-1 |                                   |              | UGCG       |            |
| Movement of actin filaments                  | EGA4-1 |                                   |              |            | MYO6       |
| Area of muscle cells                         | EGA4-1 |                                   |              | IGF1       |            |
| Survival of osteoclasts                      | EGA4-1 | NFKB1                             | NFKB1        |            | SPP1       |
| Proliferation of anterior pituitary cells    | EGA4-1 |                                   |              | IGF1       |            |
| Adhesion of neuroglia                        | EGA4-1 |                                   |              |            |            |
| Stabilization of intercellular junctions     | EGA4-1 |                                   |              | IGF1       |            |
| Relengthening of cardiomyocytes              | EGA4-1 |                                   |              | IGF1       |            |
| Chondrogenesis of fibroblast cell lines      | EGA4-1 |                                   |              |            |            |
| Catabolism of hydrogen peroxide              | EGA4-1 | ABCG2                             |              |            |            |
| Transport of rosuvastatin                    | EGA4-1 | ABCG2                             |              | SLCO2B1    |            |

|                                                |        |              |       |         |         |
|------------------------------------------------|--------|--------------|-------|---------|---------|
| Invasion of myeloma cell lines                 | EGA4-1 |              |       | IGF1    |         |
| Homeostasis of neurons                         | EGA4-1 | NFKB1        | NFKB1 |         |         |
| Morphology of cellular protrusions             | EGA4-1 | FOXA1, SPARC |       | IGF1    | MYO6    |
| Proliferation of stromal cell lines            | EGA4-1 |              |       | IGF1    |         |
| Size of leukocytes                             | EGA4-1 |              |       |         |         |
| Chondrogenesis of embryonic cell lines         | EGA4-1 |              |       |         |         |
| Vacuolation of epithelial cells                | EGA4-1 | SPARC        |       |         |         |
| Pyknosis                                       | EGA4-1 |              |       |         |         |
| Diameter of cells                              | EGA4-1 | SPARC        |       | IGF1    | SPP1    |
| Thickening of basement membrane                | EGA4-1 |              |       | IGF1    |         |
| Size of bone                                   | EGA4-1 |              |       | IGF1    | SPP1    |
| Release of hydrogen peroxide                   | EGA4-1 |              |       | IGF1    |         |
| Recruitment of phospholipid                    | EGA4-1 |              |       |         |         |
| Active avoidance response                      | EGA4-1 | NFKB1        | NFKB1 |         |         |
| Morphology of trabecular bone                  | EGA4-1 |              |       | IGF1    |         |
| Binding of phospholipid                        | EGA4-1 |              |       | IGF1    |         |
| Mass of extensor muscle                        | EGA4-1 |              |       | IGF1    | SPP1    |
| Neurogenesis of brain cells                    | EGA4-1 |              |       | IGF1    |         |
| Neuroprotection of tumor cell lines            | EGA4-1 |              |       |         |         |
| Cell viability of vascular smooth muscle cells | EGA4-1 |              |       | IGF1    |         |
| Density of microglia                           | EGA4-1 | SPARC        |       |         |         |
| Rearrangement of actin stress fibers           | EGA4-1 |              |       | IGF1    |         |
| Modification of connective tissue              | EGA4-1 |              |       | IGF1    |         |
| Accumulation of glycogen                       | EGA4-1 |              |       | SLC37A4 |         |
| Morphology of neurons                          | EGA4-1 | FOXA1, NFKB1 | NFKB1 | IGF1    | MYO6    |
| Mitogenesis of fibroblast cell lines           | EGA4-1 | SPARC        |       | IGF1    |         |
| Density of macrophages                         | EGA4-1 | SPARC        |       |         |         |
| Migration of endometrial cancer cell lines     | EGA4-1 | FOXA1        |       | IGF1    |         |
| Metabolism of cholesterol                      | EGA4-1 |              |       |         | CYP51A1 |
| Regeneration of bone                           | EGA4-1 |              |       |         |         |
| Mitogenesis of central nervous system cells    | EGA4-1 |              |       | IGF1    |         |
| Diameter of myofiber                           | EGA4-1 |              |       | IGF1    | SPP1    |
| Attachment of connective tissue cells          | EGA4-1 | SPARC        |       |         | SPP1    |
| Quantity of sulfatides                         | EGA4-1 |              |       | IGF1    |         |
| Activation of osteoblasts                      | EGA4-1 |              |       | IGF1    | SPP1    |
| Quantity of neuroblasts                        | EGA4-1 |              |       |         |         |
| Morphology of pancreas                         | EGA4-1 | EPHX2        |       | IGF1    |         |
| Cell spreading of endothelial cell lines       | EGA4-1 | SPARC        |       |         |         |
| Quantity of osteoblasts                        | EGA4-1 | NFKB1, SPARC | NFKB1 |         |         |
| Binding of cholesterol                         | EGA4-1 |              |       |         |         |
| Generation of embryonic cell lines             | EGA4-1 |              |       | IGF1    |         |
| Homeostasis of Ca <sup>2+</sup>                | EGA4-1 | NFKB1        | NFKB1 | IGF1    |         |
| Quantity of ganglioside GD3                    | EGA4-1 |              |       | UGCG    |         |
| Volume of cerebrum                             | EGA4-1 |              |       | IGF1    |         |
| Proliferation of cerebral cortex cells         | EGA4-1 |              |       | IGF1    |         |
| Damage of tumor cell lines                     | EGA4-1 |              |       |         | SPP1    |
| Stimulation of red blood cells                 | EGA4-1 |              |       | IGF1    |         |
| Aggregation of filaments                       | EGA4-1 | SPARC        |       |         |         |
| Movement of endocrine cell lines               | EGA4-1 |              |       | IGF1    | SPP1    |
| Thickness of cortical bone                     | EGA4-1 |              |       | IGF1    |         |
| Quantity of glucosylceramide                   | EGA4-1 |              |       | UGCG    |         |
| Surface area of bone                           | EGA4-1 |              |       | IGF1    |         |
| Proliferation of hippocampal cells             | EGA4-1 |              |       | IGF1    |         |
| Deposition of proteoglycan                     | EGA4-1 |              |       | IGF1    |         |
| Binding of embryonic cell lines                | EGA4-1 | TIMP3        | TIMP3 |         |         |
| Size of pancreas                               | EGA4-1 | EPHX2        |       | IGF1    |         |
| Binding of cell surface                        | EGA4-1 | SPARC        |       | IGF1    |         |

|                                                    |        |                         |            |      |                  |
|----------------------------------------------------|--------|-------------------------|------------|------|------------------|
| Density of synapse                                 | EGA4-1 |                         |            |      |                  |
| Regression of embryonic tissue                     | EGA4-1 |                         |            |      |                  |
| Healing of epithelial tissue                       | EGA4-1 | NFKB1                   | NFKB1      |      | SPP1             |
| Storage of glycogen                                | EGA4-1 |                         |            |      |                  |
| Binding of fibroblasts                             | EGA4-1 | SPARC                   |            | IGF1 | SPP1             |
| Invasion of lymphoma cell lines                    | EGA4-1 |                         |            | IGF1 |                  |
| Morphology of muscle cells                         | EGA4-1 | HSPB8, NFKB1, PTGES     | NFKB1      | IGF1 | SPP1             |
| Cytotoxicity of neurons                            | EGA4-1 |                         |            | IGF1 |                  |
| Adhesion of smooth muscle cells                    | EGA4-1 |                         |            |      | SPP1             |
| Differentiation of cholinergic neurons             | EGA4-1 |                         |            | IGF1 |                  |
| Distribution of cholesterol                        | EGA4-1 |                         |            |      |                  |
| Shape change of endothelial cell lines             | EGA4-1 | SPARC                   |            |      |                  |
| Stimulation of brain cells                         | EGA4-1 |                         |            | IGF1 |                  |
| Cell viability of muscle cells                     | EGA4-1 | HSPB8                   |            | IGF1 |                  |
| Anxiety-like behavior                              | EGA4-1 | NFKB1                   | NFKB1      | IGF1 |                  |
| Context memory                                     | EGA4-1 |                         |            | QPCT |                  |
| Oxidation of cholesterol                           | EGA4-1 |                         |            |      |                  |
| Stimulation of chondrocytes                        | EGA4-1 |                         |            | IGF1 |                  |
| Mitogenesis of neuroglia                           | EGA4-1 |                         |            | IGF1 |                  |
| Length of muscle cells                             | EGA4-1 |                         |            | IGF1 | SPP1             |
| Calcification of cells                             | EGA4-1 |                         |            |      | SPP1             |
| Differentiation of stromal cell lines              | EGA4-1 |                         |            | IGF1 |                  |
| Morphology of prostate cell lines                  | EGA4-1 |                         |            | IGF1 |                  |
| Morphology of skeletal muscle                      | EGA4-1 | FZD4                    |            | IGF1 | SPP1             |
| Shortening of cardiomyocytes                       | EGA4-1 |                         |            | IGF1 |                  |
| Area of cells                                      | EGA4-1 |                         |            | IGF1 |                  |
| Growth of metatarsal bone                          | EGA4-1 |                         |            | IGF1 |                  |
| Size of islets of Langerhans                       | EGA4-1 | EPHX2                   |            |      |                  |
| Branching of axons                                 | EGA4-2 | ETV4                    |            |      |                  |
| Cell movement of endothelial cells                 | EGA4-2 | CDH2, COL4A1, FN1, GAS6 | FN1        |      | CDH2, FN1        |
| Migration of prostate cancer cell lines            | EGA4-2 | CDH11, FN1              | FN1        |      | CAPN2, FN1       |
| Cell movement of fibrosarcoma cell lines           | EGA4-2 | CDH2, ETV4, FN1         | FN1        |      | CDH2, FN1        |
| Polarization of cells                              | EGA4-2 | CDH2, FN1               | FN1, IL12B |      | CDH2, FN1        |
| Cell movement of sarcoma cell lines                | EGA4-2 | CDH2, ETV4, FN1         | FN1        |      | CAPN2, CDH2, FN1 |
| Migration of vascular endothelial cells            | EGA4-2 | FN1, GAS6               | FN1        |      | FN1              |
| Chemotaxis of tumor cell lines                     | EGA4-2 | ETV4, FN1, GAS6         | FN1        |      | CAPN2, FN1       |
| Extension of cellular protrusions                  | EGA4-2 | CDH2, FN1, GAS6         | FN1        |      | CDH2, FN1        |
| Binding of phosphatidic acid                       | EGA4-2 | FN1, GAS6               | FN1        |      | FN1              |
| Cell death of trophoblast                          | EGA4-2 |                         |            |      | CAPN2            |
| Structural integrity of Reichert's membrane        | EGA4-2 | COL4A1                  |            |      |                  |
| Aggregation of fibroblasts                         | EGA4-2 | CDH11                   |            |      |                  |
| Cell death of endothelial cell lines               | EGA4-2 | CDH2, FN1               | FN1        |      | CDH2, CTSD, FN1  |
| Arrest in differentiation of fibroblast cell lines | EGA4-2 | FN1                     | FN1        |      | FN1              |
| Elongation of actin stress fibers                  | EGA4-2 | FN1                     | FN1        |      | FN1              |
| Retraction of pseudopodia                          | EGA4-2 | FN1                     | FN1        |      | FN1              |
| Invasion of Streptococcus sp group A               | EGA4-2 | FN1                     | FN1        |      | FN1              |
| Binding of adipose cell lines                      | EGA4-2 | FN1                     | FN1        |      | FN1              |
| Morphogenesis of cardiovascular system             | EGA4-2 | ADAM19, GAS6            |            |      |                  |
| Fertility                                          | EGA4-2 |                         |            |      |                  |
| Aggregation of myoblasts                           | EGA4-2 | CDH2                    |            |      | CDH2             |
| Localization of actin stress fibers                | EGA4-2 | FN1                     | FN1        |      | FN1              |
| Quantity of Cryptococcus neoformans                | EGA4-2 |                         | IL12B      |      |                  |
| Shape change of kidney cell lines                  | EGA4-2 | FN1                     | FN1        |      | FN1              |
| Morphology of thyroid cells                        | EGA4-2 | FN1                     | FN1        |      | FN1              |



|                                                                          |        |           |     |            |
|--------------------------------------------------------------------------|--------|-----------|-----|------------|
| Entry into G1/S phase transition of microvascular endothelial cells      | EGA4-2 | FN1       | FN1 | FN1        |
| Cell spreading of ovarian cancer cell lines                              | EGA4-2 | FN1       | FN1 | FN1        |
| Morphology of nucleoli                                                   | EGA4-2 |           |     | MTCP1      |
| Replacement of serum                                                     | EGA4-2 | FN1       | FN1 | FN1        |
| Re-entry into cell cycle progression of breast cell lines                | EGA4-2 | GAS6      |     |            |
| Chemotaxis of brain cancer cell lines                                    | EGA4-2 | GAS6      |     |            |
| Onset of differentiation of keratinocyte cancer cell lines               | EGA4-2 | FN1       | FN1 | FN1        |
| Reabsorption of cholesterol                                              | EGA4-2 | FLOT2     |     |            |
| Haptotaxis of neuroblastoma cell lines                                   | EGA4-2 | FN1       | FN1 | FN1        |
| Tubulation by bone cancer cell lines                                     | EGA4-2 |           |     |            |
| Differentiation of proplatelets                                          | EGA4-2 | FN1       | FN1 | FN1        |
| Entry into S phase of skin cell lines                                    | EGA4-2 | FN1       | FN1 | FN1        |
| Cell spreading by hematopoietic cell lines                               | EGA4-2 | FN1       | FN1 | FN1        |
| Reorganization of F-actin                                                | EGA4-2 | FN1       | FN1 | FN1        |
| Quantity of vessel                                                       | EGA4-2 |           |     |            |
| Extension of microvascular endothelial cells                             | EGA4-2 | FN1       | FN1 | FN1        |
| Activation of chondrocytes                                               | EGA4-2 | FN1       | FN1 | FN1        |
| Maintenance of embryonic stem cells                                      | EGA4-2 | FN1       | FN1 | FN1        |
| Thickness of arterial wall                                               | EGA4-2 |           |     |            |
| Assembly of fibroblast cell lines                                        | EGA4-2 | CDH2      |     | CDH2       |
| Binding of mesothelial cells                                             | EGA4-2 | FN1       | FN1 | FN1        |
| Detachment of cells                                                      | EGA4-2 | FN1       | FN1 | CAPN2, FN1 |
| Size of heart                                                            | EGA4-2 | CDH2, FN1 | FN1 | CDH2, FN1  |
| Size of muscle                                                           | EGA4-2 | FN1       | FN1 | FN1        |
| Epithelial to mesenchymal transdifferentiation of lung cancer cell lines | EGA4-2 |           |     |            |
| Morphogenesis of heart                                                   | EGA4-2 | ADAM19    |     |            |
| Delay in cell death of T lymphocytes                                     | EGA4-2 |           |     | CTSD       |
| Formation of fibronectin matrix                                          | EGA4-2 | FN1       | FN1 | FN1        |
| Structure of synapse                                                     | EGA4-2 | CDH2      |     | CDH2       |
| Remyelination of sciatic nerve                                           | EGA4-2 | ADAM19    |     |            |
| Formation of heart ventricle                                             | EGA4-2 | ADAM19    |     |            |
| Haptotaxis of breast cancer cell lines                                   | EGA4-2 | FN1       | FN1 | FN1        |
| Binding of gonadal cell lines                                            | EGA4-2 | FN1       | FN1 | FN1        |
| Formation of colorectal cancer cell lines                                | EGA4-2 | FN1       | FN1 | FN1        |
| Collapse of growth cone                                                  | EGA4-2 |           |     | CAPN2      |
| Haptotaxis of cells                                                      | EGA4-2 | FN1       | FN1 | FN1        |
| Cell spreading of squamous cell carcinoma cell lines                     | EGA4-2 | FN1       | FN1 | FN1        |
| Epithelial to mesenchymal transdifferentiation of carcinoma cell lines   | EGA4-2 |           |     |            |
| Shrinkage of fibroblasts                                                 | EGA4-2 |           |     | CTSD       |
| Healing of cornea                                                        | EGA4-2 | FN1       | FN1 | FN1        |
| Detachment of tumor cell lines                                           | EGA4-2 | FN1       | FN1 | FN1        |
| Assembly of ovarian cancer cell lines                                    | EGA4-2 | CDH2      |     | CDH2       |
| Shape change of epithelial cell lines                                    | EGA4-2 | FN1       | FN1 | FN1        |
| Development of adrenal medulla                                           | EGA4-2 |           |     |            |
| Proliferation of adrenal glomerulosa cells                               | EGA4-2 | FN1       | FN1 | FN1        |
| Transport of nucleus                                                     | EGA4-2 | FN1       | FN1 | FN1        |

|                                                                       |        |           |       |            |
|-----------------------------------------------------------------------|--------|-----------|-------|------------|
| Cell spreading of epithelial cell lines                               | EGA4-2 | FN1       | FN1   | FN1        |
| Clearance of Francisella tularensis                                   | EGA4-2 |           | IL12B |            |
| Migration of bone cancer cell lines                                   | EGA4-2 | FN1       | FN1   | CAPN2, FN1 |
| Stimulation of adrenal glomerulosa cells                              | EGA4-2 | FN1       | FN1   | FN1        |
| Anoikis of lung cancer cell lines                                     | EGA4-2 | COL4A1    |       |            |
| Chemotaxis of rhabdomyosarcoma cell lines                             | EGA4-2 | FN1       | FN1   | FN1        |
| Radioresistance of lung cancer cell lines                             | EGA4-2 | FN1       | FN1   | FN1        |
| Selection of endothelial cells                                        | EGA4-2 | FN1       | FN1   | FN1        |
| Fibrogenesis of fibronectin matrix                                    | EGA4-2 | FN1       | FN1   | FN1        |
| Chemotaxis of sarcoma cell lines                                      | EGA4-2 | ETV4, FN1 | FN1   | FN1        |
| Adhesion of astrocytes                                                | EGA4-2 | FN1       | FN1   | FN1        |
| Cytotoxicity of squamous cell carcinoma cell lines                    | EGA4-2 | FN1       | FN1   | FN1        |
| Proteolysis of peptide                                                | EGA4-2 |           |       | CTSD       |
| Morphogenesis of head                                                 | EGA4-2 | CDH2, FN1 | FN1   | CDH2, FN1  |
| Induction of focal adhesions                                          | EGA4-2 | FN1       | FN1   | FN1        |
| Delay in apoptosis of embryonic cell lines                            | EGA4-2 | FN1       | FN1   | FN1        |
| Binding of mural cells                                                | EGA4-2 | CDH2      |       | CDH2       |
| Development of effector dendritic cells                               | EGA4-2 | FN1       | FN1   | FN1        |
| Cell movement of neuroblastoma cell lines                             | EGA4-2 | FN1       | FN1   | CAPN2, FN1 |
| Cell spreading of lung cell lines                                     | EGA4-2 | FN1       | FN1   | FN1        |
| Stimulation of microglia                                              | EGA4-2 | FN1       | FN1   | FN1        |
| Formation of muscle cells                                             | EGA4-2 | FN1       | FN1   | FN1        |
| Architecture of pneumocytes                                           | EGA4-2 | CDH11     |       |            |
| Outgrowth of fibroblasts                                              | EGA4-2 |           |       | CTSD       |
| Attachment of eye cell lines                                          | EGA4-2 | FN1       | FN1   | FN1        |
| Quantity of muscle cells                                              | EGA4-2 | CDH11     |       |            |
| Apoptosis of oligodendrocytes                                         | EGA4-2 | GAS6      |       |            |
| Adhesion of neuroepithelial cells                                     | EGA4-2 | FN1       | FN1   | FN1        |
| Morphology of vessel component                                        | EGA4-2 |           |       |            |
| Outgrowth of growth cone                                              | EGA4-2 | FN1       | FN1   | FN1        |
| Attachment of bone-marrow-derived monocyte/macrophage precursor cells | EGA4-2 | FN1       | FN1   | FN1        |
| Shape change of cervical cancer cell lines                            | EGA4-2 | FN1       | FN1   | FN1        |
| Cell movement of lung cancer cell lines                               | EGA4-2 | ETV4, FN1 | FN1   | FN1        |
| Organization of sarcomere                                             | EGA4-2 | FN1       | FN1   | FN1        |
| Morphology of yolk sac                                                | EGA4-2 | CDH2      |       | CDH2       |
| Deadhesion of cells                                                   | EGA4-2 |           |       | CAPN2      |
| Transduction of multilineage progenitor cells                         | EGA4-2 | FN1       | FN1   | FN1        |
| Detachment of hematopoietic progenitor cells                          | EGA4-2 | FN1       | FN1   | FN1        |
| Maturation of focal adhesions                                         | EGA4-2 | FN1       | FN1   | FN1        |
| Cell rounding of tumor cell lines                                     | EGA4-2 | FN1       | FN1   | FN1        |
| Replication of cells                                                  | EGA4-2 |           | IL12B | CTSD       |
| Cell spreading of breast cell lines                                   | EGA4-2 | FN1       | FN1   | FN1        |
| Size of renal calyx                                                   | EGA4-2 |           |       |            |
| Size of pericardial cavity                                            | EGA4-2 | CDH2      |       | CDH2       |
| Relaxation of airway                                                  | EGA4-2 | FN1       | FN1   | FN1        |
| Chemotaxis of fibrosarcoma cell lines                                 | EGA4-2 | ETV4      |       |            |
| Transmigration of T lymphocytes                                       | EGA4-2 | COL4A1    |       |            |
| Hydrolysis of proteoglycan                                            | EGA4-2 |           |       | CTSD       |

|                                                           |        |             |            |            |
|-----------------------------------------------------------|--------|-------------|------------|------------|
| Delay in rearrangement of cytoskeleton                    | EGA4-2 | FN1         | FN1        | FN1        |
| Antiapoptosis of stomach cancer cell lines                | EGA4-2 | FN1         | FN1        | FN1        |
| Transdifferentiation of mesenchymal cells                 | EGA4-2 | COL4A1      |            |            |
| Aggregation of ventricular myocytes                       | EGA4-2 | CDH2        |            | CDH2       |
| Shape change of melanoma cell lines                       | EGA4-2 | FN1         | FN1        | FN1        |
| Binding of focal adhesions                                | EGA4-2 | FN1         | FN1        | FN1        |
| Innervation of forelimb                                   | EGA4-2 |             |            |            |
| Quantity of myofibroblasts                                | EGA4-2 | CDH11       |            |            |
| Quantity of fibroblasts                                   | EGA4-2 | CDH11, FN1  | FN1        | FN1        |
| Ingestion of cells                                        | EGA4-2 | FN1         | FN1, IL12B | FN1        |
| Ingestion by peritoneal macrophages                       | EGA4-2 |             | IL12B      |            |
| Formation of aortic valve                                 | EGA4-2 | ADAM19      |            |            |
| Release of proteoglycan                                   | EGA4-2 | FN1         | FN1        | FN1        |
| Morphogenesis of medial ganglionic eminences              | EGA4-2 | CDH2        |            | CDH2       |
| Formation of adipose tissue                               | EGA4-2 |             |            |            |
| Cell-cell adhesion of fibroblast cell lines               | EGA4-2 | CDH11       |            |            |
| Formation of pulmonary valve                              | EGA4-2 | ADAM19      |            |            |
| Cell spreading of bone cancer cell lines                  | EGA4-2 | FN1         | FN1        | CAPN2, FN1 |
| Binding of caveolae                                       | EGA4-2 | CAVIN2      |            |            |
| Aggregation of cortical neurons                           | EGA4-2 | CDH2        |            | CDH2       |
| Uptake of thymocytes                                      | EGA4-2 | GAS6        |            |            |
| Arrest in mid-G1 phase of microvascular endothelial cells | EGA4-2 | FN1         | FN1        | FN1        |
| Accumulation of breast cancer cell lines                  | EGA4-2 |             |            |            |
| Cell spreading of eye cell lines                          | EGA4-2 | FN1         | FN1        | FN1        |
| Adhesion of Yersinia pestis                               | EGA4-2 | FN1         | FN1        | FN1        |
| Ingestion of red blood cells                              | EGA4-2 |             | IL12B      |            |
| Delay in formation of focal adhesions                     | EGA4-2 | FN1         | FN1        | FN1        |
| Dynamics of cell-matrix contacts                          | EGA4-2 | FN1         | FN1        | FN1        |
| Interaction of stromal cell lines                         | EGA4-2 | FN1         | FN1        | FN1        |
| Cell movement of neuroglia                                | EGA4-2 | FN1, GAS6   | FN1        | FN1        |
| Length of vascular sprout                                 | EGA4-2 | GAS6        |            |            |
| Contact growth inhibition of endothelial cell lines       | EGA4-2 |             |            |            |
| Degeneration of extracellular matrix                      | EGA4-2 |             | IL12B      |            |
| Attachment of leukemia cell lines                         | EGA4-2 | FN1         | FN1        | FN1        |
| Angiogenesis of chorioallantoic membrane                  | EGA4-2 | FN1         | FN1        | FN1        |
| Formation of basal layer of epidermis                     | EGA4-2 | CDH11       |            |            |
| Permeability of connective tissue cells                   | EGA4-2 | COL4A1      |            |            |
| Adhesion of E. coli                                       | EGA4-2 | FN1         | FN1        | FN1        |
| Transmigration of lymphocytes                             | EGA4-2 | COL4A1, FN1 | FN1        | FN1        |
| Degradation of autophagosomes                             | EGA4-2 |             |            | CTSD       |
| Cell spreading of keratinocyte cancer cell lines          | EGA4-2 | FN1         | FN1        | FN1        |
| Anoikis of squamous cell carcinoma cell lines             | EGA4-2 | FN1         | FN1        | FN1        |
| Morphogenesis of kidney                                   | EGA4-2 |             |            |            |
| Proliferation of microvascular endothelial cells          | EGA4-2 | FN1, GAS6   | FN1        | FN1        |
| Detachment of cervical cancer cell lines                  | EGA4-2 | FN1         | FN1        | FN1        |

|                                                           |        |             |     |     |
|-----------------------------------------------------------|--------|-------------|-----|-----|
| Delay in formation of actin stress fibers                 | EGA4-2 | FN1         | FN1 | FN1 |
| Release of specific granules                              | EGA4-2 | FN1         | FN1 | FN1 |
| Structural integrity of basement membrane                 | EGA4-2 | COL4A1      |     |     |
| Anoikis of carcinoma cell lines                           | EGA4-2 | COL4A1, FN1 | FN1 | FN1 |
| Binding of carbohydrate                                   | EGA4-2 | FN1, GAS6   | FN1 | FN1 |
| Ingestion of Streptococcus sp group A                     | EGA4-2 | FN1         | FN1 | FN1 |
| Formation of connective tissue                            | EGA4-2 |             |     |     |
| Accumulation of protein fragment                          | EGA4-2 | FN1         | FN1 | FN1 |
| Development of tail bud                                   | EGA4-2 | FN1         | FN1 | FN1 |
| Differentiation of dorsal root ganglion cells             | EGA4-2 | ETV4        |     |     |
| Branching of oligodendrocytes                             | EGA4-2 | GAS6        |     |     |
| Tubulation by sarcoma cell lines                          | EGA4-2 |             |     |     |
| Formation of atrioventricular canal cushion               | EGA4-2 | FN1         | FN1 | FN1 |
| Formation of actin cytoskeleton                           | EGA4-2 | FN1         | FN1 | FN1 |
| Invasion of fibrosarcoma cell lines                       | EGA4-2 | ETV4, FN1   | FN1 | FN1 |
| Quantity of bone cells                                    | EGA4-3 |             |     |     |
| Quantity of lymphocytes                                   | EGA4-3 |             |     |     |
| Quantity of connective tissue cells                       | EGA4-3 |             |     |     |
| Binding of endothelial cells                              | EGA4-3 |             |     |     |
| Quantity of osteoblasts                                   | EGA4-3 |             |     |     |
| Cell movement of sarcoma cell lines                       | EGA4-3 |             |     |     |
| Recruitment of cells                                      | EGA4-3 |             |     |     |
| Differentiation of bone cells                             | EGA4-3 |             |     |     |
| Proliferation of liver cells                              | EGA4-3 |             |     |     |
| Cell movement of granulocytes                             | EGA4-3 |             |     |     |
| Proliferation of hepatic stellate cells                   | EGA4-3 |             |     |     |
| Survival of soft tissue                                   | EGA4-3 |             |     |     |
| Transendothelial migration of leukocytes                  | EGA4-3 |             |     |     |
| Translocation of galactosylceramide                       | EGA4-3 |             |     |     |
| Expression of mRNA                                        | EGA4-3 |             |     |     |
| Development of microvasculature                           | EGA4-3 |             |     |     |
| Destruction of cancer cells                               | EGA4-3 |             |     |     |
| Response of helper T lymphocytes                          | EGA4-3 |             |     |     |
| Delay in initiation of differentiation of lung cell lines | EGA4-3 |             |     |     |
| Cell viability of neuroglia                               | EGA4-3 |             |     |     |
| Development of bone marrow cells                          | EGA4-3 |             |     |     |
| Sequestration of cholesterol                              | EGA4-3 |             |     |     |
| Cell movement of endothelial cell lines                   | EGA4-3 |             |     |     |
| Cleavage of coumarin                                      | EGA4-3 |             |     |     |
| Accumulation of granules                                  | EGA4-3 |             |     |     |
| Relaxation of vascular smooth muscle cells                | EGA4-3 |             |     |     |
| Migration of glioblastoma cells                           | EGA4-3 |             |     |     |
| Binding of splenocytes                                    | EGA4-3 |             |     |     |
| Translocation of lactosylceramide                         | EGA4-3 |             |     |     |
| Stabilization of myelin sheath                            | EGA4-3 |             |     |     |
| Structure of myelin sheath                                | EGA4-3 |             |     |     |
| Polarization of lymphoma cell lines                       | EGA4-3 |             |     |     |
| Dissemination of diffuse large B-cell lymphoma cells      | EGA4-3 |             |     |     |
| Proliferation of hepatic stellate cells/myofibroblasts    | EGA4-3 |             |     |     |
| Cellular infiltration by granulocytes                     | EGA4-3 |             |     |     |

|                                                                   |           |        |
|-------------------------------------------------------------------|-----------|--------|
| Accumulation of lysosome                                          | EGA4-3    |        |
| Cell movement of bone cancer cell lines                           | EGA4-3    |        |
| Clonal expansion of Th2 cells                                     | EGA4-3    |        |
| Myelination                                                       | EGA4-3    |        |
| Cell death of type 1 macrophages                                  | EGA4-3    |        |
| Cell death of exocrine cells                                      | EGA4-3    |        |
| Adhesion of leukemia cell lines                                   | EGA4-3    |        |
| Elongation of B lymphocytes                                       | EGA4-3    |        |
| Size of T-cell zone                                               | EGA4-3    |        |
| Survival of oligodendrocytes                                      | EGA4-3    |        |
| Translocation of glucosylceramide                                 | EGA4-3    |        |
| Dissemination of tumor cell lines                                 | EGA4-3    |        |
| Elimination of red blood cells                                    | EGA4-3    |        |
| Replicative senescence of fibroblast cell lines                   | EGA4-4    |        |
| Colony formation of breast cell lines                             | BL-Down-1 | ID4    |
| Development of gastrointestinal tract                             | BL-Down-1 |        |
| Mislocalization of melanosomes                                    | BL-Down-1 |        |
| Weakness of dentin                                                | BL-Down-1 |        |
| Depolarization of hair cells                                      | BL-Down-1 |        |
| Synthesis of UDP-N-acetyl-D-galactosamine                         | BL-Down-1 |        |
| Development of stereocilia                                        | BL-Down-1 |        |
| Transepithelial electrical resistance of breast cancer cell lines | BL-Down-1 | ID1    |
| Degradation of photoreceptors                                     | BL-Down-1 |        |
| Cell survival of cardiomyocytes                                   | BL-Down-1 | FBXO32 |
| Colony formation of epithelial cell lines                         | BL-Down-1 | ID4    |
| Activation of vascular endothelial cells                          | BL-Down-1 | ID1    |
| Movement of melanosomes                                           | BL-Down-1 |        |
| Glycolysis of hepatoma cell lines                                 | BL-Down-1 | ID1    |
| Self-renewal of colorectal cancer cell lines                      | BL-Down-1 | ID1    |
| Transmigration of vascular endothelial cells                      | BL-Down-1 | ID1    |
| Signaling of astrocytes                                           | BL-Down-1 |        |
| Length of telomeres                                               | BL-Down-1 | ID1    |
| Binding of GATA-4 binding site                                    | BL-Down-1 | ID1    |
| Binding of Nkx2.5 binding site                                    | BL-Down-1 | ID1    |
| Accumulation of carcinoma cell lines                              | BL-Down-1 | ID1    |
| Cytostasis of smooth muscle cells                                 | BL-Down-1 | ID1    |
| Size of white adipocytes                                          | BL-Down-1 | ID1    |
| G1 phase of bone cancer cell lines                                | BL-Down-1 | NPAT   |
| Premature senescence of breast cancer cell lines                  | BL-Down-1 | ID1    |
| Neurogenesis of neuroepithelial cells                             | BL-Down-1 | ID1    |
| Response of astrocytes                                            | BL-Down-1 |        |
| Blood pressure                                                    | BL-Down-1 | STK39  |
| Movement of organelle                                             | BL-Down-1 |        |
| Accumulation of lung cancer cell lines                            | BL-Down-1 | ID1    |
| Re-entry into cell cycle progression of fibroblast cell lines     | BL-Down-1 | ID1    |
| Differentiation of pro-T3 thymocytes                              | BL-Down-1 | ID1    |
